# Supplementary material for: Selective cell cycle arrest in glioblastoma cell lines by quantum molecular resonance alone or in combination with temozolomide
Source: PubMed Central journal article supplement (PMC9427848; doi:10.1038/s41416-022-01865-9), 2022-06-17
Supplement: 41416_2022_1865_MOESM3_ESM.pdf [file 41416_2022_1865_MOESM3_ESM.pdf]

**Supplementary Table 2: List of proteins identified as differentially expressed between QMR-stimulated A172 cells and untreated A172 cells.**

For each protein, Master Protein Accessions number (Uniprot), Description, Prot. Fold change (QMR-stimulated cells/Untreated cells) and p-value are reported. Prot. Fold change are given as log<sub>2</sub>-fold changes, while p-value as -log<sub>2</sub> (p-value). Statistical confidence was assessed when p-value < 0.05, corresponding to -log<sub>2</sub> (p-value) of 4.32.

| Master Protein Accessions | Description                                                                                                                                | Prot. Fold change (QMR/CON) | p-value  |
|---------------------------|--------------------------------------------------------------------------------------------------------------------------------------------|-----------------------------|----------|
| P0DMV8                    | Heat shock 70 kDa protein 1A OS=Homo sapiens OX=9606 GN=HSPA1A PE=1 SV=1                                                                   | 1,100507731                 | 27,67607 |
| Q92598                    | Heat shock protein 105 kDa OS=Homo sapiens OX=9606 GN=HSPH1 PE=1 SV=1                                                                      | 0,766016297                 | 26,29133 |
| P05067                    | Amyloid-beta precursor protein OS=Homo sapiens OX=9606 GN=APP PE=1 SV=3                                                                    | 1,238685396                 | 20,88259 |
| Q86VI3                    | Ras GTPase-activating-like protein IQGAP3 OS=Homo sapiens OX=9606 GN=IQGAP3 PE=1 SV=2                                                      | -0,409947188                | 18,13224 |
| Q70J99                    | Protein unc-13 homolog D OS=Homo sapiens OX=9606 GN=UNC13D PE=1 SV=1                                                                       | -0,526101103                | 16,8476  |
| P07900                    | Heat shock protein HSP 90-alpha OS=Homo sapiens OX=9606 GN=HSP90AA1 PE=1 SV=5                                                              | 0,408210295                 | 15,97805 |
| Q9UIG0                    | Tyrosine-protein kinase BAZ1B OS=Homo sapiens OX=9606 GN=BAZ1B PE=1 SV=2                                                                   | -0,585779337                | 15,83447 |
| P19022                    | Cadherin-2 OS=Homo sapiens OX=9606 GN=CDH2 PE=1 SV=4                                                                                       | 0,654397699                 | 15,78797 |
| Q14980                    | Nuclear mitotic apparatus protein 1 OS=Homo sapiens OX=9606 GN=NUMA1 PE=1 SV=2                                                             | -0,324504926                | 15,34378 |
| Q15149                    | Plectin OS=Homo sapiens OX=9606 GN=PLEC PE=1 SV=3                                                                                          | -0,145333337                | 14,86967 |
| Q14573                    | Inositol 1,4,5-trisphosphate receptor type 3 OS=Homo sapiens OX=9606 GN=ITPR3 PE=1 SV=2                                                    | -0,46701753                 | 13,58753 |
| P11021                    | Endoplasmic reticulum chaperone BiP OS=Homo sapiens OX=9606 GN=HSPA5 PE=1 SV=2                                                             | 0,424757819                 | 13,48377 |
| Q9UI42                    | Carboxypeptidase A4 OS=Homo sapiens OX=9606 GN=CPA4 PE=1 SV=2                                                                              | 0,943419525                 | 13,35155 |
| Q5UIP0                    | Telomere-associated protein RIF1 OS=Homo sapiens OX=9606 GN=RIF1 PE=1 SV=2                                                                 | -0,529760454                | 12,56023 |
| P05997                    | ADP-ribosylation factor OS=Homo sapiens OX=9606 GN=COL5A2 PE=1 SV=3                                                                        | -0,628981492                | 12,1749  |
| O14578                    | Citron Rho-interacting kinase OS=Homo sapiens OX=9606 GN=CIT PE=1 SV=2                                                                     | -0,922172648                | 12,1157  |
| P38159                    | RNA-binding motif protein, X chromosome OS=Homo sapiens OX=9606 GN=RBMX PE=1 SV=3                                                          | -0,590758409                | 11,28239 |
| Q8N6H7                    | ADP-ribosylation factor GTPase-activating protein 2 OS=Homo sapiens OX=9606 GN=ARFGAP2 PE=1 SV=1                                           | -0,742148552                | 11,15986 |
| Q9NZV1                    | Cysteine-rich motor neuron 1 protein OS=Homo sapiens OX=9606 GN=CRIM1 PE=1 SV=1                                                            | 1,123502861                 | 11,05439 |
| Q03252                    | Lamin-B2 OS=Homo sapiens OX=9606 GN=LMNB2 PE=1 SV=4                                                                                        | -0,40085882                 | 10,9707  |
| Q16881                    | Thioredoxin reductase 1, cytoplasmic OS=Homo sapiens OX=9606 GN=TXNRD1 PE=1 SV=3                                                           | 0,450778428                 | 10,83938 |
| O94925                    | Glutaminase kidney isoform, mitochondrial OS=Homo sapiens OX=9606 GN=GLS PE=1 SV=1                                                         | 0,47776665                  | 10,57246 |
| Q8N3D4                    | EH domain-binding protein 1-like protein 1 OS=Homo sapiens OX=9606 GN=EHP1L1 PE=1 SV=2                                                     | -0,520139427                | 10,5068  |
| Q04727                    | Transducin-like enhancer protein 4 OS=Homo sapiens OX=9606 GN=MLE4 PE=1 SV=3                                                               | -0,571111414                | 10,3133  |
| Q9NTJ3                    | Structural maintenance of chromosomes protein 4 OS=Homo sapiens OX=9606 GN=SMC4 PE=1 SV=2                                                  | -0,298907275                | 10,20581 |
| Q96FV9                    | THO complex subunit 1 OS=Homo sapiens OX=9606 GN=THOC1 PE=1 SV=1                                                                           | 1,176746538                 | 10,10459 |
| Q9Y4L1                    | Hypoxia up-regulated protein 1 OS=Homo sapiens OX=9606 GN=HYOU1 PE=1 SV=1                                                                  | 0,355835752                 | 9,96849  |
| Q6P2Q9                    | Pre-mRNA-processing-splicing factor 8 OS=Homo sapiens OX=9606 GN=PRPF8 PE=1 SV=2                                                           | -0,213324703                | 9,87812  |
| P26358                    | DNA (cytosine-5)-methyltransferase 1 OS=Homo sapiens OX=9606 GN=DNMT1 PE=1 SV=2                                                            | -0,384676926                | 9,800383 |
| P31943                    | Heterogeneous nuclear ribonucleoprotein H OS=Homo sapiens OX=9606 GN=HNRNPH1 PE=1 SV=4                                                     | -0,526676355                | 9,774646 |
| Q9Y4P3                    | Transducin beta-like protein 2 OS=Homo sapiens OX=9606 GN=TL2 PE=1 SV=1                                                                    | -0,693148944                | 9,676369 |
| Q9NRZ9                    | Lymphoid-specific helicase OS=Homo sapiens OX=9606 GN=HELLS PE=1 SV=1                                                                      | -0,650116748                | 9,61945  |
| Q9UQE7                    | Structural maintenance of chromosomes protein 3 OS=Homo sapiens OX=9606 GN=SMC3 PE=1 SV=2                                                  | -0,33016746                 | 9,569587 |
| Q8IVT2                    | Mitotic interactor and substrate of PLK1 OS=Homo sapiens OX=9606 GN=MISP PE=1 SV=1                                                         | -0,581359229                | 9,494459 |
| P26022                    | Pentraxin-related protein PTX3 OS=Homo sapiens OX=9606 GN=PTX3 PE=1 SV=3                                                                   | 0,947085739                 | 9,489922 |
| Q96I85                    | CDK5 regulatory subunit-associated protein 3 OS=Homo sapiens OX=9606 GN=CDK5RAP3 PE=1 SV=2                                                 | -0,609344397                | 9,485461 |
| P25205                    | DNA replication licensing factor MCM3 OS=Homo sapiens OX=9606 GN=MCM3 PE=1 SV=3                                                            | -0,327887062                | 9,47227  |
| Q9H0D6                    | 5'-3' exoribonuclease 2 OS=Homo sapiens OX=9606 GN=XRN2 PE=1 SV=1                                                                          | -0,478846169                | 9,434629 |
| O95466                    | Formin-like protein 1 OS=Homo sapiens OX=9606 GN=FMNL1 PE=1 SV=3                                                                           | -0,462835121                | 9,392634 |
| P13667                    | Protein disulfide-isomerase A4 OS=Homo sapiens OX=9606 GN=PDISA4 PE=1 SV=2                                                                 | 0,319879941                 | 9,352209 |
| P07384                    | Calpain-1 catalytic subunit OS=Homo sapiens OX=9606 GN=CAPN1 PE=1 SV=1                                                                     | -0,333787959                | 9,080745 |
| P35052                    | Glycocalyx OS=Homo sapiens OX=9606 GN=GPC1 PE=1 SV=2                                                                                       | 0,496121937                 | 9,054547 |
| Q9UHD1                    | Cysteine and histidine-rich domain-containing protein 1 OS=Homo sapiens OX=9606 GN=CHORDC1 PE=1 SV=2                                       | 0,613412784                 | 8,99118  |
| Q96T51                    | RUN and FYVE domain-containing protein 1 OS=Homo sapiens OX=9606 GN=RUFY1 PE=1 SV=2                                                        | 0,420934982                 | 8,910553 |
| P11047                    | Laminin subunit gamma-1 OS=Homo sapiens OX=9606 GN=LAMC1 PE=1 SV=3                                                                         | 0,322761281                 | 8,848569 |
| P20700                    | Lamin-B1 OS=Homo sapiens OX=9606 GN=LMNB1 PE=1 SV=2                                                                                        | -0,298189085                | 8,763174 |
| O95757                    | Heat shock 70 kDa protein 4L OS=Homo sapiens OX=9606 GN=HSPA4L PE=1 SV=3                                                                   | 0,540999649                 | 8,693131 |
| Q49915                    | GMP synthase [glutamine-hydrolyzing] OS=Homo sapiens OX=9606 GN=GMPS PE=1 SV=1                                                             | -0,352366265                | 8,646388 |
| Q9UBP9                    | PTB domain-containing engulfment adapter protein 1 OS=Homo sapiens OX=9606 GN=ENGULP1 PE=1 SV=1                                            | 1,109645531                 | 8,583771 |
| P07602                    | Prosaposin OS=Homo sapiens OX=9606 GN=PSAP PE=1 SV=2                                                                                       | 0,460244073                 | 8,583546 |
| P52701                    | DNA mismatch repair protein Msh6 OS=Homo sapiens OX=9606 GN=MSH6 PE=1 SV=2                                                                 | -0,306641242                | 8,392816 |
| Q99426                    | Tubulin-folding cofactor B OS=Homo sapiens OX=9606 GN=TBCB PE=1 SV=2                                                                       | -0,648051479                | 8,350125 |
| Q15021                    | Condensin complex subunit 1 OS=Homo sapiens OX=9606 GN=NCAPD2 PE=1 SV=3                                                                    | -0,284244895                | 8,321293 |
| P33991                    | DNA replication licensing factor MCM4 OS=Homo sapiens OX=9606 GN=MCM4 PE=1 SV=5                                                            | -0,330567775                | 8,315138 |
| P22626                    | Heterogeneous nuclear ribonucleoproteins A2/B1 OS=Homo sapiens OX=9606 GN=HNRNPA2B1 PE=1 SV=2                                              | -0,421075673                | 8,272437 |
| Q9Y266                    | Nuclear migration protein nudC OS=Homo sapiens OX=9606 GN=NUDC PE=1 SV=1                                                                   | -0,446708947                | 8,251116 |
| Q8N5S9                    | Calcium/calmodulin-dependent protein kinase kinase 1 OS=Homo sapiens OX=9606 GN=CAMKK1 PE=1 SV=2                                           | -0,712383799                | 8,247057 |
| Q14683                    | Structural maintenance of chromosomes protein 1A OS=Homo sapiens OX=9606 GN=SMC1A PE=1 SV=2                                                | -0,324807975                | 8,105624 |
| P31040                    | Succinate dehydrogenase [ubiquinone] flavoprotein subunit, mitochondrial OS=Homo sapiens OX=9606 GN=SDHA PE=1 SV=1                         | -0,508817672                | 8,052184 |
| Q8IVF2                    | Protein AHNK2 OS=Homo sapiens OX=9606 GN=AHNK2 PE=1 SV=2                                                                                   | -0,143105355                | 8,030647 |
| P32004                    | Neural cell adhesion molecule L1 OS=Homo sapiens OX=9606 GN=L1CAM PE=1 SV=2                                                                | 0,390273196                 | 8,030518 |
| Q9Y618                    | Nuclear receptor corepressor 2 OS=Homo sapiens OX=9606 GN=NCOR2 PE=1 SV=3                                                                  | -0,466903993                | 7,98653  |
| Q96DT5                    | Dynein heavy chain 11, axonemal OS=Homo sapiens OX=9606 GN=DNAH11 PE=1 SV=4                                                                | -0,66378416                 | 7,912597 |
| Q9Y6R4                    | Mitogen-activated protein kinase kinase kinase 4 OS=Homo sapiens OX=9606 GN=MAP3K4 PE=1 SV=2                                               | -4,931300587                | 7,905637 |
| P35555                    | Fibrillin-1 OS=Homo sapiens OX=9606 GN=FBN1 PE=1 SV=4                                                                                      | 0,31127404                  | 7,812346 |
| Q12841                    | Follistatin-related protein 1 OS=Homo sapiens OX=9606 GN=FSTL1 PE=1 SV=1                                                                   | 0,495163343                 | 7,780212 |
| Q555J5                    | Heterochromatin protein 1-binding protein 3 OS=Homo sapiens OX=9606 GN=HP1BP3 PE=1 SV=1                                                    | -0,605809655                | 7,729926 |
| Q14181                    | DNA polymerase alpha subunit B OS=Homo sapiens OX=9606 GN=POLA2 PE=1 SV=2                                                                  | -0,765037388                | 7,702432 |
| O60814                    | Histone H2B type 1-K OS=Homo sapiens OX=9606 GN=HIST1H2BK PE=1 SV=3                                                                        | -0,849255497                | 7,66532  |
| P26373                    | 60S ribosomal protein L13 OS=Homo sapiens OX=9606 GN=RPL13 PE=1 SV=4                                                                       | -0,600692635                | 7,654261 |
| Q9BXF6                    | Rab11 family-interacting protein 5 OS=Homo sapiens OX=9606 GN=RAB11FIP5 PE=1 SV=1                                                          | -0,46917322                 | 7,651168 |
| P33993                    | DNA replication licensing factor MCM7 OS=Homo sapiens OX=9606 GN=MCM7 PE=1 SV=4                                                            | -0,323126327                | 7,632501 |
| O60264                    | SWI/SNF-related matrix-associated actin-dependent regulator of chromatin subfamily A member 5 OS=Homo sapiens OX=9606 GN=SMARCA5 PE=1 SV=2 | -0,342771568                | 7,625586 |
| P49757                    | Protein numb homolog OS=Homo sapiens OX=9606 GN=NUMB PE=1 SV=2                                                                             | 0,637834872                 | 7,589886 |
| Q86XP3                    | ATP-dependent RNA helicase DDX42 OS=Homo sapiens OX=9606 GN=DDX42 PE=1 SV=1                                                                | -0,394674035                | 7,57431  |
| Q14839                    | Chromodomain-helicase-DNA-binding protein 4 OS=Homo sapiens OX=9606 GN=CHD4 PE=1 SV=2                                                      | -0,263528369                | 7,572811 |
| P16035                    | Metalloproteinase inhibitor 2 OS=Homo sapiens OX=9606 GN=TIMP2 PE=1 SV=2                                                                   | 1,144000206                 | 7,568129 |
| P42892                    | Endothelin-converting enzyme 1 OS=Homo sapiens OX=9606 GN=ECE1 PE=1 SV=2                                                                   | -0,462546009                | 7,511679 |
| Q14320                    | Protein FAM50A OS=Homo sapiens OX=9606 GN=FAM50A PE=1 SV=2                                                                                 | 0,589475059                 | 7,488025 |
| P31153                    | S-adenosylmethionine synthase isoform type-2 OS=Homo sapiens OX=9606 GN=MAT2A PE=1 SV=1                                                    | -0,42751927                 | 7,449081 |
| Q9Y3P9                    | Rab GTPase-activating protein 1 OS=Homo sapiens OX=9606 GN=RABGAP1 PE=1 SV=3                                                               | 0,389270418                 | 7,432667 |
| O95361                    | Tripartite motif-containing protein 16 OS=Homo sapiens OX=9606 GN=TRIM16 PE=1 SV=3                                                         | 0,400022992                 | 7,41638  |
| P04114                    | Apolipoprotein B-100 OS=Homo sapiens OX=9606 GN=APOB PE=1 SV=2                                                                             | -0,816849389                | 7,380933 |
| P46779                    | 60S ribosomal protein L28 OS=Homo sapiens OX=9606 GN=RPL28 PE=1 SV=3                                                                       | -0,671175268                | 7,37651  |

|        |                                                                                                                 |              |          |
|--------|-----------------------------------------------------------------------------------------------------------------|--------------|----------|
| A6NHR9 | Structural maintenance of chromosomes flexible hinge domain-containing protein 1 OS=Homo sapiens OX=9606 GN=SMC | -0,315285313 | 7,366322 |
| Q4J6C6 | Prolyl endopeptidase-like OS=Homo sapiens OX=9606 GN=PREPL PE=1 SV=1                                            | 0,620301065  | 7,354225 |
| P20908 | Collagen alpha-1(V) chain OS=Homo sapiens OX=9606 GN=COL5A1 PE=1 SV=3                                           | -0,395341713 | 7,298596 |
| P16949 | Stathmin OS=Homo sapiens OX=9606 GN=STMN1 PE=1 SV=3                                                             | -0,904083096 | 7,173686 |
| Q9UJY1 | Heat shock protein beta-8 OS=Homo sapiens OX=9606 GN=HSPB8 PE=1 SV=1                                            | 0,710554028  | 7,133103 |
| Q9NSD9 | Phenylalanine-tRNA ligase beta subunit OS=Homo sapiens OX=9606 GN=FARSB PE=1 SV=3                               | -0,367435131 | 7,126147 |
| O75534 | Cold shock domain-containing protein E1 OS=Homo sapiens OX=9606 GN=CSD1 PE=1 SV=2                               | -0,302248878 | 7,114836 |
| P30405 | Peptidyl-prolyl cis-trans isomerase F, mitochondrial OS=Homo sapiens OX=9606 GN=PPIF PE=1 SV=1                  | -1,037115513 | 6,98212  |
| P52272 | Heterogeneous nuclear ribonucleoprotein M OS=Homo sapiens OX=9606 GN=HNRNPM PE=1 SV=3                           | -0,238405771 | 6,878542 |
| P00374 | Dihydrofolate reductase OS=Homo sapiens OX=9606 GN=DHFR PE=1 SV=2                                               | -0,685478459 | 6,866056 |
| Q92900 | Regulator of nonsense transcripts 1 OS=Homo sapiens OX=9606 GN=UPF1 PE=1 SV=2                                   | 0,26707213   | 6,841371 |
| P04792 | Heat shock protein beta-1 OS=Homo sapiens OX=9606 GN=HSPB1 PE=1 SV=2                                            | 0,388099715  | 6,830711 |
| P54577 | Tyrosine--tRNA ligase, cytoplasmic OS=Homo sapiens OX=9606 GN=YARS PE=1 SV=4                                    | 0,346036528  | 6,792228 |
| P55735 | Protein SEC13 homolog OS=Homo sapiens OX=9606 GN=SEC13 PE=1 SV=3                                                | 0,427295907  | 6,773318 |
| Q96PK6 | RNA-binding protein 14 OS=Homo sapiens OX=9606 GN=RBM14 PE=1 SV=2                                               | -0,385174827 | 6,760901 |
| P32322 | Pyroline-5-carboxylate reductase 1, mitochondrial OS=Homo sapiens OX=9606 GN=PYCR1 PE=1 SV=2                    | 0,611417394  | 6,650592 |
| P36551 | Oxygen-dependent coproporphyrinogen-III oxidase, mitochondrial OS=Homo sapiens OX=9606 GN=CPOX PE=1 SV=3        | 0,568181193  | 6,646307 |
| P05121 | Plasminogen activator inhibitor 1 OS=Homo sapiens OX=9606 GN=SERPINE1 PE=1 SV=1                                 | 0,420056329  | 6,622644 |
| Q14315 | Filamin-C OS=Homo sapiens OX=9606 GN=FLNC PE=1 SV=3                                                             | 0,182015141  | 6,602201 |
| Q13217 | DnaJ homolog subfamily C member 3 OS=Homo sapiens OX=9606 GN=DNAJC3 PE=1 SV=1                                   | 0,528566607  | 6,578384 |
| Q96T88 | E3 ubiquitin-protein ligase UHRF1 OS=Homo sapiens OX=9606 GN=UHRF1 PE=1 SV=1                                    | -0,377354058 | 6,574862 |
| Q6P179 | Endoplasmic reticulum aminopeptidase 2 OS=Homo sapiens OX=9606 GN=ERAP2 PE=1 SV=2                               | -0,470308287 | 6,500147 |
| O14777 | Kinetochore protein NDC80 homolog OS=Homo sapiens OX=9606 GN=NDC80 PE=1 SV=1                                    | -0,397119312 | 6,449328 |
| P48741 | #N/D                                                                                                            | 0,942310795  | 6,429107 |
| O43143 | Pre-mRNA-splicing factor ATP-dependent RNA helicase DHX15 OS=Homo sapiens OX=9606 GN=DHX15 PE=1 SV=2            | 0,324489304  | 6,418941 |
| P49841 | Glycogen synthase kinase-3 beta OS=Homo sapiens OX=9606 GN=GSK3B PE=1 SV=2                                      | 0,643950046  | 6,417271 |
| P54652 | #N/D                                                                                                            | 0,591202061  | 6,401597 |
| O75935 | Dynactin subunit 3 OS=Homo sapiens OX=9606 GN=DCTN3 PE=1 SV=1                                                   | -0,642088185 | 6,396969 |
| Q6VY07 | Phosphofurin acidic cluster sorting protein 1 OS=Homo sapiens OX=9606 GN=PACS1 PE=1 SV=2                        | -0,549644476 | 6,392322 |
| Q9H0W8 | Protein SMG9 OS=Homo sapiens OX=9606 GN=SMG9 PE=1 SV=1                                                          | -0,934562845 | 6,382462 |
| O15294 | UDP-N-acetylglucosamine--peptide N-acetylglucosaminyltransferase 110 kDa subunit OS=Homo sapiens OX=9606 GN=OG  | 0,322273888  | 6,357134 |
| Q15035 | Translocating chain-associated membrane protein 2 OS=Homo sapiens OX=9606 GN=TRAM2 PE=1 SV=1                    | 1,332234709  | 6,306937 |
| Q96AC1 | Fermitin family homolog 2 OS=Homo sapiens OX=9606 GN=FERMT2 PE=1 SV=1                                           | 0,293374192  | 6,282414 |
| P38606 | V-type proton ATPase catalytic subunit A OS=Homo sapiens OX=9606 GN=ATP6V1A PE=1 SV=2                           | 0,297198692  | 6,218693 |
| Q96F22 | Abasic site processing protein HMCES OS=Homo sapiens OX=9606 GN=HMCES PE=1 SV=1                                 | -0,689862796 | 6,217497 |
| Q14978 | Nucleolar and coiled-body phosphoprotein 1 OS=Homo sapiens OX=9606 GN=NOLC1 PE=1 SV=2                           | -0,476300707 | 6,200439 |
| Q14847 | LIM and SH3 domain protein 1 OS=Homo sapiens OX=9606 GN=LASP1 PE=1 SV=2                                         | 0,385436669  | 6,196311 |
| P26640 | Valine--tRNA ligase OS=Homo sapiens OX=9606 GN=VARS PE=1 SV=4                                                   | -0,232706446 | 6,168296 |
| Q9NUW8 | Tyrosyl-DNA phosphodiesterase 1 OS=Homo sapiens OX=9606 GN=TDP1 PE=1 SV=2                                       | -0,675001352 | 6,141814 |
| Q8TAQ2 | SWI/SNF complex subunit SMARCC2 OS=Homo sapiens OX=9606 GN=SMARCC2 PE=1 SV=1                                    | -0,32918341  | 6,114339 |
| Q9UDT6 | CAP-Gly domain-containing linker protein 2 OS=Homo sapiens OX=9606 GN=CLIP2 PE=1 SV=1                           | 0,567726633  | 6,110606 |
| Q02790 | Peptidyl-prolyl cis-trans isomerase FKBP4 OS=Homo sapiens OX=9606 GN=FKBP4 PE=1 SV=3                            | 0,305385447  | 6,083424 |
| P53794 | Sodium/myo-inositol cotransporter OS=Homo sapiens OX=9606 GN=SLC5A3 PE=1 SV=2                                   | 1,091249868  | 6,079101 |
| Q9B268 | Putative FERM domain-containing protein FRMD8P1 OS=Homo sapiens OX=9606 GN=FRMD8P1 PE=5 SV=2                    | -1,477291437 | 6,044246 |
| P07951 | Tropomyosin beta chain OS=Homo sapiens OX=9606 GN=TPM2 PE=1 SV=1                                                | -1,078945046 | 6,024314 |
| Q8IY17 | Neuropathy target esterase OS=Homo sapiens OX=9606 GN=PNPLA6 PE=1 SV=3                                          | 0,491256511  | 6,017629 |
| P86791 | Vacuolar fusion protein CCZ1 homolog OS=Homo sapiens OX=9606 GN=CCZ1 PE=1 SV=1                                  | -1,480770545 | 6,007626 |
| Q92922 | SWI/SNF complex subunit SMARCC1 OS=Homo sapiens OX=9606 GN=SMARCC1 PE=1 SV=3                                    | -0,558214582 | 5,992198 |
| P62191 | 26S proteasome regulatory subunit 4 OS=Homo sapiens OX=9606 GN=PSMC1 PE=1 SV=1                                  | -0,301803794 | 5,982247 |
| P42167 | Lamina-associated polypeptide 2, isoforms beta/gamma OS=Homo sapiens OX=9606 GN=TMPO PE=1 SV=2                  | -0,388289023 | 5,966849 |
| P28300 | Protein-lysine 6-oxidase OS=Homo sapiens OX=9606 GN=LOX PE=1 SV=2                                               | 0,661984814  | 5,952077 |
| P23229 | Integrin alpha-6 OS=Homo sapiens OX=9606 GN=ITGA6 PE=1 SV=5                                                     | -0,350316498 | 5,939486 |
| Q9H9Y6 | DNA-directed RNA polymerase I subunit RPA2 OS=Homo sapiens OX=9606 GN=POLR1B PE=1 SV=2                          | 0,86161417   | 5,93218  |
| P25685 | DnaJ homolog subfamily B member 1 OS=Homo sapiens OX=9606 GN=DNAJB1 PE=1 SV=4                                   | 0,417109077  | 5,906861 |
| P78357 | Contactin-associated protein 1 OS=Homo sapiens OX=9606 GN=CNTNAP1 PE=1 SV=1                                     | -0,514020436 | 5,901945 |
| Q92616 | eIF-2-alpha kinase activator GCN1 OS=Homo sapiens OX=9606 GN=GCN1 PE=1 SV=6                                     | 0,151670021  | 5,886434 |
| Q8IWR1 | Tripartite motif-containing protein 59 OS=Homo sapiens OX=9606 GN=TRIM59 PE=1 SV=1                              | -0,672833626 | 5,875547 |
| Q99707 | Methionine synthase OS=Homo sapiens OX=9606 GN=MTR PE=1 SV=2                                                    | -0,433695679 | 5,862973 |
| Q8NB90 | ATPase family protein 2 homolog OS=Homo sapiens OX=9606 GN=SPATA5 PE=1 SV=3                                     | -0,508465911 | 5,825294 |
| P11279 | Lysosome-associated membrane glycoprotein 1 OS=Homo sapiens OX=9606 GN=LAMP1 PE=1 SV=3                          | -0,727821879 | 5,820399 |
| Q8NB72 | Kinetochore protein Spc24 OS=Homo sapiens OX=9606 GN=SPC24 PE=1 SV=2                                            | -0,725272087 | 5,799827 |
| Q14444 | Caprin-1 OS=Homo sapiens OX=9606 GN=CAPRIN1 PE=1 SV=2                                                           | -0,366058568 | 5,796488 |
| Q9Y230 | RuvB-like 2 OS=Homo sapiens OX=9606 GN=RUVBL2 PE=1 SV=3                                                         | -0,36566528  | 5,772082 |
| Q15642 | Cdc42-interacting protein 4 OS=Homo sapiens OX=9606 GN=TRIP10 PE=1 SV=3                                         | 0,427819513  | 5,761171 |
| Q8WVY7 | Ubiquitin-like domain-containing CTD phosphatase 1 OS=Homo sapiens OX=9606 GN=UBLCP1 PE=1 SV=2                  | -0,538365779 | 5,744315 |
| P56945 | Breast cancer anti-estrogen resistance protein 1 OS=Homo sapiens OX=9606 GN=BCAR1 PE=1 SV=2                     | -0,407950762 | 5,738392 |
| P12236 | ADP/ATP translocase 3 OS=Homo sapiens OX=9606 GN=SLC25A6 PE=1 SV=4                                              | -0,31399347  | 5,722995 |
| P17813 | Endoglin OS=Homo sapiens OX=9606 GN=ENG PE=1 SV=2                                                               | 0,445091799  | 5,694073 |
| Q5JV50 | Intracellular hyaluronan-binding protein 4 OS=Homo sapiens OX=9606 GN=HABP4 PE=1 SV=1                           | -0,821341913 | 5,674844 |
| Q9HBL8 | NmrA-like family domain-containing protein 1 OS=Homo sapiens OX=9606 GN=NMRAL1 PE=1 SV=1                        | -1,002358059 | 5,673539 |
| Q92597 | Protein NDRG1 OS=Homo sapiens OX=9606 GN=NDRG1 PE=1 SV=1                                                        | 0,707382197  | 5,654708 |
| P46821 | Microtubule-associated protein 1B OS=Homo sapiens OX=9606 GN=MAP1B PE=1 SV=2                                    | 0,146069597  | 5,603639 |
| Q04637 | Eukaryotic translation initiation factor 4 gamma 1 OS=Homo sapiens OX=9606 GN=EIF4G1 PE=1 SV=4                  | -0,210032015 | 5,589431 |
| Q9H2U1 | ATP-dependent DNA/RNA helicase DHX36 OS=Homo sapiens OX=9606 GN=DHX36 PE=1 SV=2                                 | -0,437068434 | 5,564287 |
| P50748 | Kinetochore-associated protein 1 OS=Homo sapiens OX=9606 GN=KNCTC1 PE=1 SV=1                                    | -0,416354729 | 5,563045 |
| Q99959 | Plakophilin-2 OS=Homo sapiens OX=9606 GN=PKP2 PE=1 SV=2                                                         | 0,489354203  | 5,561337 |
| P46778 | 60S ribosomal protein L21 OS=Homo sapiens OX=9606 GN=RPL21 PE=1 SV=2                                            | -0,566367453 | 5,5597   |
| O00622 | CCN family member 1 OS=Homo sapiens OX=9606 GN=CCN1 PE=1 SV=1                                                   | 1,311211042  | 5,532306 |
| Q969M7 | NEDD8-conjugating enzyme UBE2F OS=Homo sapiens OX=9606 GN=UBE2F PE=1 SV=1                                       | -1,519009522 | 5,521599 |
| P55060 | Exportin-2 OS=Homo sapiens OX=9606 GN=CSE1L PE=1 SV=3                                                           | -0,191120719 | 5,516734 |
| P06454 | Prothymosin alpha OS=Homo sapiens OX=9606 GN=PTMA PE=1 SV=2                                                     | -0,687817523 | 5,494465 |
| Q7L014 | Probable ATP-dependent RNA helicase DDX46 OS=Homo sapiens OX=9606 GN=DDX46 PE=1 SV=2                            | -0,266493454 | 5,470879 |
| P18031 | Tyrosine-protein phosphatase non-receptor type 1 OS=Homo sapiens OX=9606 GN=PTPN1 PE=1 SV=1                     | 0,376859931  | 5,454379 |
| P30046 | D-dopachrome decarboxylase OS=Homo sapiens OX=9606 GN=DDT PE=1 SV=3                                             | -0,786808931 | 5,449156 |
| O95365 | Zinc finger and BTB domain-containing protein 7A OS=Homo sapiens OX=9606 GN=ZBTB7A PE=1 SV=1                    | -1,716323563 | 5,446129 |
| Q725L9 | Interferon regulatory factor 2-binding protein 2 OS=Homo sapiens OX=9606 GN=IRF2BP2 PE=1 SV=2                   | -0,681144918 | 5,439452 |
| P04181 | Ornithine aminotransferase, mitochondrial OS=Homo sapiens OX=9606 GN=OAT PE=1 SV=1                              | 0,479997159  | 5,432043 |
| O14776 | Transcription elongation regulator 1 OS=Homo sapiens OX=9606 GN=TCERG1 PE=1 SV=2                                | 0,28765388   | 5,412681 |
| O15355 | Protein phosphatase 1G OS=Homo sapiens OX=9606 GN=PPM1G PE=1 SV=1                                               | -0,388011807 | 5,373811 |
| O75208 | Ubiquinone biosynthesis protein COQ9, mitochondrial OS=Homo sapiens OX=9606 GN=COQ9 PE=1 SV=1                   | -0,762044136 | 5,356462 |
| Q9NVH6 | Trimethyllysine dioxygenase, mitochondrial OS=Homo sapiens OX=9606 GN=TMLHE PE=1 SV=1                           | 0,124505619  | 5,348471 |

|        |                                                                                                                   |              |          |
|--------|-------------------------------------------------------------------------------------------------------------------|--------------|----------|
| O15013 | Rho guanine nucleotide exchange factor 10 OS=Homo sapiens OX=9606 GN=ARHGEF10 PE=1 SV=4                           | 0,38593372   | 5,336009 |
| Q13435 | Splicing factor 3B subunit 2 OS=Homo sapiens OX=9606 GN=SF3B2 PE=1 SV=2                                           | -0,260989017 | 5,309081 |
| O00233 | 26S proteasome non-ATPase regulatory subunit 9 OS=Homo sapiens OX=9606 GN=PSMD9 PE=1 SV=3                         | -0,595116393 | 5,302369 |
| P61587 | Rho-related GTP-binding protein RhoE OS=Homo sapiens OX=9606 GN=RND3 PE=1 SV=1                                    | 1,227113298  | 5,278166 |
| O15230 | Laminin subunit alpha-5 OS=Homo sapiens OX=9606 GN=LAMA5 PE=1 SV=8                                                | 0,660984538  | 5,27214  |
| P51648 | Aldehyde dehydrogenase family 3 member A2 OS=Homo sapiens OX=9606 GN=ALDH3A2 PE=1 SV=1                            | 0,418532551  | 5,265371 |
| Q27181 | Inverted formin-2 OS=Homo sapiens OX=9606 GN=INF2 PE=1 SV=2                                                       | -0,214531418 | 5,26145  |
| O95905 | Protein ecdysoless homolog OS=Homo sapiens OX=9606 GN=ECD PE=1 SV=1                                               | -0,658821379 | 5,254092 |
| Q14690 | Protein RRP5 homolog OS=Homo sapiens OX=9606 GN=PRDC11 PE=1 SV=3                                                  | -0,39817058  | 5,250394 |
| Q8WXI7 | Mucin-16 OS=Homo sapiens OX=9606 GN=MUC16 PE=1 SV=3                                                               | -1,432335195 | 5,244283 |
| Q9HD33 | 39S ribosomal protein L47, mitochondrial OS=Homo sapiens OX=9606 GN=MRPL47 PE=1 SV=2                              | -0,657497648 | 5,243038 |
| Q9NV11 | Fanconi anemia group I protein OS=Homo sapiens OX=9606 GN=FANCI PE=1 SV=4                                         | -0,340171697 | 5,233762 |
| O95864 | Acyl-CoA 6-desaturase OS=Homo sapiens OX=9606 GN=FADS2 PE=1 SV=1                                                  | -0,536602813 | 5,225358 |
| Q6PGP7 | Tetratricopeptide repeat protein 37 OS=Homo sapiens OX=9606 GN=TTC37 PE=1 SV=1                                    | -0,396567645 | 5,222941 |
| P62820 | Ras-related protein Rab-1A OS=Homo sapiens OX=9606 GN=RAB1A PE=1 SV=3                                             | 0,39625911   | 5,217659 |
| Q96QD8 | Sodium-coupled neutral amino acid transporter 2 OS=Homo sapiens OX=9606 GN=SLC38A2 PE=1 SV=2                      | 2,04726514   | 5,212591 |
| P12277 | Creatine kinase B-type OS=Homo sapiens OX=9606 GN=CKB PE=1 SV=1                                                   | -0,584725335 | 5,199907 |
| Q9Y520 | Protein PRRC2C OS=Homo sapiens OX=9606 GN=PRRC2C PE=1 SV=4                                                        | -0,251978962 | 5,186192 |
| Q5SRE5 | Nucleoporin NUP188 homolog OS=Homo sapiens OX=9606 GN=NUP188 PE=1 SV=1                                            | -0,308220848 | 5,17948  |
| P25440 | Bromodomain-containing protein 2 OS=Homo sapiens OX=9606 GN=BRD2 PE=1 SV=2                                        | 1,205993753  | 5,166198 |
| Q06010 | Protein diaphanous homolog 1 OS=Homo sapiens OX=9606 GN=DIAPH1 PE=1 SV=2                                          | -0,227079123 | 5,157093 |
| Q9NQ29 | Putative RNA-binding protein Luc7-like 1 OS=Homo sapiens OX=9606 GN=LUC7L PE=1 SV=1                               | 0,458947815  | 5,14127  |
| Q723K3 | Pogo transposable element with ZNF domain OS=Homo sapiens OX=9606 GN=POGZ PE=1 SV=2                               | -0,432861734 | 5,140879 |
| Q12873 | Chromodomain-helicase-DNA-binding protein 3 OS=Homo sapiens OX=9606 GN=CHD3 PE=1 SV=3                             | -0,290724099 | 5,13701  |
| P30153 | Serine/threonine-protein phosphatase 2A 65 kDa regulatory subunit A alpha isoform OS=Homo sapiens OX=9606 GN=PPP1 | -0,277227956 | 5,136861 |
| Q9HCC0 | Methylcrotonoyl-CoA carboxylase beta chain, mitochondrial OS=Homo sapiens OX=9606 GN=MCCC2 PE=1 SV=1              | -0,432341073 | 5,133092 |
| Q09666 | Neuroblast differentiation-associated protein AHNAK OS=Homo sapiens OX=9606 GN=AHNAK PE=1 SV=2                    | -0,074972772 | 5,126681 |
| P20962 | Parathyromin OS=Homo sapiens OX=9606 GN=PTMS PE=1 SV=2                                                            | -1,176525417 | 5,118787 |
| Q9H653 | Epidermal growth factor receptor kinase substrate 8-like protein 2 OS=Homo sapiens OX=9606 GN=EPS8L2 PE=1 SV=2    | -0,270050764 | 5,107236 |
| P08195 | 4F2 cell-surface antigen heavy chain OS=Homo sapiens OX=9606 GN=SLC3A2 PE=1 SV=3                                  | 0,288942782  | 5,092879 |
| O95453 | Poly(A)-specific ribonuclease PARN OS=Homo sapiens OX=9606 GN=PARN PE=1 SV=1                                      | -0,639007101 | 5,087875 |
| O94973 | AP-2 complex subunit alpha-2 OS=Homo sapiens OX=9606 GN=AP2A2 PE=1 SV=2                                           | -0,296203324 | 5,08778  |
| Q9HBM1 | Kinetochore protein Spc25 OS=Homo sapiens OX=9606 GN=SPC25 PE=1 SV=1                                              | -0,573048891 | 5,084342 |
| Q9BT25 | HAUS augmin-like complex subunit 8 OS=Homo sapiens OX=9606 GN=HAUS8 PE=1 SV=3                                     | -0,880562644 | 5,07901  |
| P63244 | Receptor of activated protein C kinase 1 OS=Homo sapiens OX=9606 GN=RACK1 PE=1 SV=3                               | -0,312607445 | 5,07766  |
| P55290 | Cadherin-13 OS=Homo sapiens OX=9606 GN=CDH13 PE=1 SV=1                                                            | 0,522804858  | 5,069621 |
| Q13155 | Aminoacyl tRNA synthase complex-interacting multifunctional protein 2 OS=Homo sapiens OX=9606 GN=AIMP2 PE=1 SV=1  | -0,483954744 | 5,060895 |
| Q9Y4K0 | Lysyl oxidase homolog 2 OS=Homo sapiens OX=9606 GN=LOXL2 PE=1 SV=1                                                | 0,343372186  | 5,059587 |
| Q86UX7 | Fermitin family homolog 3 OS=Homo sapiens OX=9606 GN=FERMT3 PE=1 SV=1                                             | -0,521374896 | 5,053458 |
| P14635 | G2/mitotic-specific cyclin-B1 OS=Homo sapiens OX=9606 GN=CCNB1 PE=1 SV=1                                          | 0,569221056  | 5,046362 |
| O00468 | Agrin OS=Homo sapiens OX=9606 GN=AGRN PE=1 SV=6                                                                   | 0,56752152   | 5,029485 |
| O00154 | Cytosolic acyl coenzyme A thioester hydrolase OS=Homo sapiens OX=9606 GN=ACOT7 PE=1 SV=3                          | 0,450792563  | 5,028717 |
| Q6NYC8 | Phostensin OS=Homo sapiens OX=9606 GN=PPP1R18 PE=1 SV=1                                                           | -0,384935672 | 5,024309 |
| P16520 | Guanine nucleotide-binding protein G(I)/G(S)/G(T) subunit beta-3 OS=Homo sapiens OX=9606 GN=GNB3 PE=1 SV=1        | -0,385969313 | 5,003753 |
| P06737 | Glycogen phosphorylase, liver form OS=Homo sapiens OX=9606 GN=PYGL PE=1 SV=4                                      | 0,300450821  | 4,999036 |
| P50454 | Serpin H1 OS=Homo sapiens OX=9606 GN=SERPINH1 PE=1 SV=2                                                           | 0,27828048   | 4,998192 |
| Q13724 | Mannosyl-oligosaccharide glucosidase OS=Homo sapiens OX=9606 GN=MOGS PE=1 SV=5                                    | 0,265590957  | 4,987722 |
| P31350 | Ribonucleoside-diphosphate reductase subunit M2 OS=Homo sapiens OX=9606 GN=RRM2 PE=1 SV=1                         | -0,421655403 | 4,97348  |
| Q01581 | Hydroxymethylglutaryl-CoA synthase, cytoplasmic OS=Homo sapiens OX=9606 GN=HMGC1S PE=1 SV=2                       | -0,399004641 | 4,952243 |
| Q01130 | Serine/arginine-rich splicing factor 2 OS=Homo sapiens OX=9606 GN=SRSF2 PE=1 SV=4                                 | -0,710740752 | 4,935646 |
| Q9Y6M1 | Insulin-like growth factor 2 mRNA-binding protein 2 OS=Homo sapiens OX=9606 GN=IGF2BP2 PE=1 SV=2                  | 0,419111434  | 4,935542 |
| P00533 | Epidermal growth factor receptor OS=Homo sapiens OX=9606 GN=EGFR PE=1 SV=2                                        | -0,289772068 | 4,934144 |
| Q9H7D0 | Dedicator of cytokinesis protein 5 OS=Homo sapiens OX=9606 GN=DOCK5 PE=1 SV=3                                     | -0,363475587 | 4,930204 |
| Q3V6T2 | Girdin OS=Homo sapiens OX=9606 GN=CCDC88A PE=1 SV=2                                                               | -0,705911078 | 4,90229  |
| Q8IWB7 | WD repeat and FYVE domain-containing protein 1 OS=Homo sapiens OX=9606 GN=WDFY1 PE=1 SV=1                         | 0,507518575  | 4,896644 |
| Q9BQG0 | Myb-binding protein 1A OS=Homo sapiens OX=9606 GN=MYBBP1A PE=1 SV=2                                               | -0,218822676 | 4,885599 |
| Q16850 | Lanosterol 14-alpha demethylase OS=Homo sapiens OX=9606 GN=CYP51A1 PE=1 SV=3                                      | -0,842260004 | 4,882202 |
| P09486 | SPARC OS=Homo sapiens OX=9606 GN=SPARC PE=1 SV=1                                                                  | 0,505350931  | 4,872083 |
| Q9NZN4 | EH domain-containing protein 2 OS=Homo sapiens OX=9606 GN=EHD2 PE=1 SV=2                                          | -0,287072304 | 4,870044 |
| Q14566 | DNA replication licensing factor MCM6 OS=Homo sapiens OX=9606 GN=MCM6 PE=1 SV=1                                   | -0,224631238 | 4,851272 |
| O75475 | PC4 and SFRS1-interacting protein OS=Homo sapiens OX=9606 GN=PSIP1 PE=1 SV=1                                      | -0,392632082 | 4,850545 |
| P49023 | Paxillin OS=Homo sapiens OX=9606 GN=PXN PE=1 SV=3                                                                 | 0,286193086  | 4,84922  |
| Q14558 | Phosphoribosyl pyrophosphate synthase-associated protein 1 OS=Homo sapiens OX=9606 GN=PRPSAP1 PE=1 SV=2           | -0,467017212 | 4,847605 |
| Q8NOX7 | Spartin OS=Homo sapiens OX=9606 GN=SPART PE=1 SV=1                                                                | 0,344951411  | 4,846367 |
| P24330 | Aldo-keto reductase family 1 member C3 OS=Homo sapiens OX=9606 GN=AKR1C3 PE=1 SV=4                                | 0,546980457  | 4,824829 |
| Q9NP72 | Ras-related protein Rab-18 OS=Homo sapiens OX=9606 GN=RAB18 PE=1 SV=1                                             | 0,546933209  | 4,824356 |
| P51114 | Fragile X mental retardation syndrome-related protein 1 OS=Homo sapiens OX=9606 GN=FXR1 PE=1 SV=3                 | 0,248478971  | 4,811335 |
| Q8TCS8 | Polyribonucleotide nucleotidyltransferase 1, mitochondrial OS=Homo sapiens OX=9606 GN=PNPT1 PE=1 SV=2             | -0,341838425 | 4,78788  |
| Q9NV70 | Exocyst complex component 1 OS=Homo sapiens OX=9606 GN=EXOC1 PE=1 SV=4                                            | -0,369000885 | 4,754056 |
| O60566 | Mitotic checkpoint serine/threonine-protein kinase BUB1 beta OS=Homo sapiens OX=9606 GN=BUB1B PE=1 SV=3           | 0,494479359  | 4,748803 |
| P61160 | Actin-related protein 2 OS=Homo sapiens OX=9606 GN=ACTR2 PE=1 SV=1                                                | -0,352886117 | 4,740793 |
| Q63HR2 | #N/D                                                                                                              | -1,037592145 | 4,732433 |
| Q86UU1 | Pleckstrin homology-like domain family B member 1 OS=Homo sapiens OX=9606 GN=PHLDB1 PE=1 SV=1                     | 0,296141802  | 4,712006 |
| P84098 | 60S ribosomal protein L19 OS=Homo sapiens OX=9606 GN=RPL19 PE=1 SV=1                                              | -0,535664248 | 4,711591 |
| O75828 | Carbonyl reductase [NADPH] 3 OS=Homo sapiens OX=9606 GN=CBR3 PE=1 SV=3                                            | -0,403551303 | 4,70409  |
| Q15554 | Telomeric repeat-binding factor 2 OS=Homo sapiens OX=9606 GN=TERF2 PE=1 SV=3                                      | -1,043346342 | 4,694031 |
| P23634 | Plasma membrane calcium-transporting ATPase 4 OS=Homo sapiens OX=9606 GN=ATP2B4 PE=1 SV=2                         | 0,295234615  | 4,692071 |
| Q9UN86 | Ras GTPase-activating protein-binding protein 2 OS=Homo sapiens OX=9606 GN=G3BP2 PE=1 SV=2                        | 0,454468329  | 4,689609 |
| Q96760 | Bifunctional polyphosphatase/kinase OS=Homo sapiens OX=9606 GN=PNKP PE=1 SV=1                                     | -0,589834571 | 4,66926  |
| P23921 | Ribonucleoside-diphosphate reductase large subunit OS=Homo sapiens OX=9606 GN=RRM1 PE=1 SV=1                      | -0,225861431 | 4,661472 |
| P06703 | Protein S100-A6 OS=Homo sapiens OX=9606 GN=S100A6 PE=1 SV=1                                                       | -0,36289126  | 4,651074 |
| Q13200 | 26S proteasome non-ATPase regulatory subunit 2 OS=Homo sapiens OX=9606 GN=PSMD2 PE=1 SV=3                         | -0,171919661 | 4,640752 |
| Q93008 | Probable ubiquitin carboxyl-terminal hydrolase FAF-X OS=Homo sapiens OX=9606 GN=USP9X PE=1 SV=3                   | 0,159341526  | 4,625079 |
| Q8N766 | ER membrane protein complex subunit 1 OS=Homo sapiens OX=9606 GN=EMC1 PE=1 SV=1                                   | -0,36116698  | 4,622078 |
| P00403 | Cytochrome c oxidase subunit 2 OS=Homo sapiens OX=9606 GN=MT-CO2 PE=1 SV=1                                        | -0,792828449 | 4,62099  |
| Q16531 | DNA damage-binding protein 1 OS=Homo sapiens OX=9606 GN=DDB1 PE=1 SV=1                                            | -0,197996232 | 4,586259 |
| Q9UQ35 | Serine/arginine repetitive matrix protein 2 OS=Homo sapiens OX=9606 GN=SRRM2 PE=1 SV=2                            | 0,235640788  | 4,584979 |
| P43686 | 26S proteasome regulatory subunit 6B OS=Homo sapiens OX=9606 GN=PSMCA4 PE=1 SV=2                                  | -0,255613539 | 4,579262 |
| Q8NBF6 | Late secretory pathway protein AVL9 homolog OS=Homo sapiens OX=9606 GN=AVL9 PE=1 SV=1                             | -0,784280687 | 4,574987 |
| O76021 | Ribosomal L1 domain-containing protein 1 OS=Homo sapiens OX=9606 GN=RSL1D1 PE=1 SV=3                              | -0,318286751 | 4,56647  |
| P61254 | 60S ribosomal protein L26 OS=Homo sapiens OX=9606 GN=RPL26 PE=1 SV=1                                              | -0,416623277 | 4,558535 |

|        |                                                                                                                |              |          |
|--------|----------------------------------------------------------------------------------------------------------------|--------------|----------|
| P10809 | 60 kDa heat shock protein, mitochondrial OS=Homo sapiens OX=9606 GN=HSPD1 PE=1 SV=2                            | 0,197027433  | 4,553496 |
| O00264 | Membrane-associated progesterone receptor component 1 OS=Homo sapiens OX=9606 GN=PGRMC1 PE=1 SV=3              | 0,655501262  | 4,548914 |
| O75190 | Dnaj homolog subfamily B member 6 OS=Homo sapiens OX=9606 GN=DNAJB6 PE=1 SV=2                                  | 0,519021959  | 4,544499 |
| Q9BTY7 | Protein HGH1 homolog OS=Homo sapiens OX=9606 GN=HGH1 PE=1 SV=1                                                 | -0,778424378 | 4,543325 |
| Q8TCE6 | Protein FAM45A OS=Homo sapiens OX=9606 GN=FAM45A PE=2 SV=1                                                     | -0,476157721 | 4,540752 |
| Q9NVF8 | Bcl-2-associated transcription factor 1 OS=Homo sapiens OX=9606 GN=BCLAF1 PE=1 SV=2                            | -0,316851734 | 4,53861  |
| Q9Y399 | 28S ribosomal protein S2, mitochondrial OS=Homo sapiens OX=9606 GN=MRP52 PE=1 SV=1                             | -0,573734656 | 4,530386 |
| P40855 | Peroxisomal biogenesis factor 19 OS=Homo sapiens OX=9606 GN=PEX19 PE=1 SV=1                                    | -0,355683226 | 4,530073 |
| Q06210 | Glutamine--fructose-6-phosphate aminotransferase [isomerizing] 1 OS=Homo sapiens OX=9606 GN=GFPT1 PE=1 SV=3    | 0,237507266  | 4,510753 |
| Q13362 | Serine/threonine-protein phosphatase 2A 56 kDa regulatory subunit gamma isoform OS=Homo sapiens OX=9606 GN=PPF | -0,57059318  | 4,503193 |
| O00203 | AP-3 complex subunit beta-1 OS=Homo sapiens OX=9606 GN=AP3B1 PE=1 SV=3                                         | -0,224351427 | 4,50295  |
| Q9H8G6 | Intraflagellar transport protein 122 homolog OS=Homo sapiens OX=9606 GN=IFT122 PE=1 SV=2                       | -0,460904433 | 4,496014 |
| P14866 | Heterogeneous nuclear ribonucleoprotein L OS=Homo sapiens OX=9606 GN=HNRNPL PE=1 SV=2                          | -0,264351147 | 4,495274 |
| P41240 | Tyrosine-protein kinase CSK OS=Homo sapiens OX=9606 GN=CSK PE=1 SV=1                                           | -0,36913477  | 4,478067 |
| Q3YEC7 | Rab-like protein 6 OS=Homo sapiens OX=9606 GN=RABL6 PE=1 SV=2                                                  | -0,47044284  | 4,475809 |
| Q96KBS | Lymphokine-activated killer T-cell-originated protein kinase OS=Homo sapiens OX=9606 GN=PBK PE=1 SV=3          | -0,410585019 | 4,475758 |
| P46783 | 40S ribosomal protein S10 OS=Homo sapiens OX=9606 GN=RPS10 PE=1 SV=1                                           | -0,387981106 | 4,473699 |
| Q13243 | Serine/arginine-rich splicing factor 5 OS=Homo sapiens OX=9606 GN=SRSF5 PE=1 SV=1                              | -0,765111053 | 4,470917 |
| Q9BUP3 | Oxidoreductase HTATIP2 OS=Homo sapiens OX=9606 GN=HTATIP2 PE=1 SV=2                                            | 0,983468289  | 4,467731 |
| Q68E01 | Integrator complex subunit 3 OS=Homo sapiens OX=9606 GN=INTS3 PE=1 SV=1                                        | -0,43650907  | 4,463725 |
| Q04917 | 14-3-3 protein eta OS=Homo sapiens OX=9606 GN=YWHAH PE=1 SV=4                                                  | -0,367794137 | 4,456948 |
| O00116 | Alkylidihydroxyacetonephosphate synthase, peroxisomal OS=Homo sapiens OX=9606 GN=AGPS PE=1 SV=1                | 0,302123622  | 4,452807 |
| Q6DKI1 | 60S ribosomal protein L7-like 1 OS=Homo sapiens OX=9606 GN=RPL7L1 PE=1 SV=2                                    | -0,641809521 | 4,451327 |
| O43913 | Origin recognition complex subunit 5 OS=Homo sapiens OX=9606 GN=ORC5 PE=1 SV=1                                 | -0,980833317 | 4,450809 |
| P55145 | Mesencephalic astrocyte-derived neurotrophic factor OS=Homo sapiens OX=9606 GN=MANF PE=1 SV=3                  | 0,760922613  | 4,448012 |
| Q9Y4G6 | Talin-2 OS=Homo sapiens OX=9606 GN=TLN2 PE=1 SV=4                                                              | -0,312159248 | 4,447791 |
| P00750 | Tissue-type plasminogen activator OS=Homo sapiens OX=9606 GN=PLAT PE=1 SV=1                                    | 0,508529725  | 4,438855 |
| Q8IY33 | MICAL-like protein 2 OS=Homo sapiens OX=9606 GN=MICAL2 PE=1 SV=1                                               | -0,803753689 | 4,434377 |
| P11388 | DNA topoisomerase 2-alpha OS=Homo sapiens OX=9606 GN=TOP2A PE=1 SV=3                                           | 0,204591009  | 4,430424 |
| Q15019 | Septin-2 OS=Homo sapiens OX=9606 GN=SEPTIN2 PE=1 SV=1                                                          | -0,268051873 | 4,425384 |
| P10909 | Clusterin OS=Homo sapiens OX=9606 GN=CLU PE=1 SV=1                                                             | 0,973174276  | 4,422861 |
| Q5JPE7 | Nodal modulator 2 OS=Homo sapiens OX=9606 GN=NOMO2 PE=1 SV=1                                                   | 0,221208329  | 4,41259  |
| Q6PJG6 | BRCA1-associated ATM activator 1 OS=Homo sapiens OX=9606 GN=BRAT1 PE=1 SV=2                                    | -0,274000524 | 4,398179 |
| P46013 | Proliferation marker protein Ki-67 OS=Homo sapiens OX=9606 GN=MKI67 PE=1 SV=2                                  | -0,281146047 | 4,385464 |
| Q08117 | TLE family member 5 OS=Homo sapiens OX=9606 GN=TLE5 PE=1 SV=4                                                  | -0,748903333 | 4,381954 |
| P04818 | Thymidylate synthase OS=Homo sapiens OX=9606 GN=TYMS PE=1 SV=3                                                 | -0,403443199 | 4,378093 |
| Q9GZP8 | Immortalization up-regulated protein OS=Homo sapiens OX=9606 GN=IMUP PE=1 SV=1                                 | -1,506531561 | 4,375642 |
| Q9HA64 | Ketosamine-3-kinase OS=Homo sapiens OX=9606 GN=FN3KRP PE=1 SV=2                                                | -0,501886384 | 4,37186  |
| O15347 | High mobility group protein B3 OS=Homo sapiens OX=9606 GN=HMGB3 PE=1 SV=4                                      | -0,554393494 | 4,362499 |
| P49591 | Serine--tRNA ligase, cytoplasmic OS=Homo sapiens OX=9606 GN=SARS PE=1 SV=3                                     | 0,27957549   | 4,351643 |
| P02786 | Transferrin receptor protein 1 OS=Homo sapiens OX=9606 GN=TFRC PE=1 SV=2                                       | 0,427446671  | 4,34992  |
| P42858 | Huntingtin OS=Homo sapiens OX=9606 GN=HTT PE=1 SV=2                                                            | -0,552778804 | 4,348434 |
| Q8NFF5 | FAD synthase OS=Homo sapiens OX=9606 GN=FLAD1 PE=1 SV=1                                                        | -0,36036451  | 4,3402   |
| O15067 | Phosphoribosylformylglycinamide synthase OS=Homo sapiens OX=9606 GN=PFAS PE=1 SV=4                             | -0,235525092 | 4,331958 |
| Q13131 | 5'-AMP-activated protein kinase catalytic subunit alpha-1 OS=Homo sapiens OX=9606 GN=PRKAA1 PE=1 SV=4          | -0,496756586 | 4,320078 |
| Q9NUU7 | ATP-dependent RNA helicase DDX19A OS=Homo sapiens OX=9606 GN=DDX19A PE=1 SV=1                                  | 0,737520025  | 4,318938 |
| Q15185 | Prostaglandin E synthase 3 OS=Homo sapiens OX=9606 GN=PTGES3 PE=1 SV=1                                         | 0,496053262  | 4,312976 |
| P21333 | Filamin-A OS=Homo sapiens OX=9606 GN=FLNA PE=1 SV=4                                                            | -0,093600684 | 4,293507 |
| Q9NPD8 | Ubiquitin-conjugating enzyme E2 T OS=Homo sapiens OX=9606 GN=UBE2T PE=1 SV=1                                   | -0,546272219 | 4,291684 |
| O15066 | Kinesin-like protein KIF3B OS=Homo sapiens OX=9606 GN=KIF3B PE=1 SV=1                                          | 0,493299602  | 4,28516  |
| Q9Y5J9 | Mitochondrial import inner membrane translocase subunit Tim8 B OS=Homo sapiens OX=9606 GN=TIMM8B PE=1 SV=1     | -0,352556474 | 4,285153 |
| Q9Y448 | Small kinetochore-associated protein OS=Homo sapiens OX=9606 GN=KNSTRN PE=1 SV=2                               | -0,934002552 | 4,277633 |
| Q14240 | Eukaryotic initiation factor 4A-II OS=Homo sapiens OX=9606 GN=EIF4A2 PE=1 SV=2                                 | 0,617202282  | 4,274285 |
| P30520 | Adenylosuccinate synthetase isozyme 2 OS=Homo sapiens OX=9606 GN=ADSS PE=1 SV=3                                | -0,3255019   | 4,257788 |
| Q9BRQ8 | Apoptosis-inducing factor 2 OS=Homo sapiens OX=9606 GN=AIFM2 PE=1 SV=1                                         | -0,72575754  | 4,253362 |
| P0DPD5 | #N/D                                                                                                           | -0,488649397 | 4,252128 |
| Q5T6F2 | Ubiquitin-associated protein 2 OS=Homo sapiens OX=9606 GN=UBAP2 PE=1 SV=1                                      | -0,613667771 | 4,248685 |
| P30040 | Endoplasmic reticulum resident protein 29 OS=Homo sapiens OX=9606 GN=ERP29 PE=1 SV=4                           | 0,450453531  | 4,248609 |
| P62857 | 40S ribosomal protein S28 OS=Homo sapiens OX=9606 GN=RPS28 PE=1 SV=1                                           | -0,925446661 | 4,245395 |
| P09651 | Heterogeneous nuclear ribonucleoprotein A1 OS=Homo sapiens OX=9606 GN=HNRNPA1 PE=1 SV=5                        | -0,301554131 | 4,24419  |
| Q14011 | Cold-inducible RNA-binding protein OS=Homo sapiens OX=9606 GN=CIRBP PE=1 SV=1                                  | -0,72390883  | 4,243013 |
| Q53E24 | Centrosomal protein of 55 kDa OS=Homo sapiens OX=9606 GN=CEP55 PE=1 SV=3                                       | -0,338350081 | 4,241504 |
| P01024 | #N/D                                                                                                           | 0,72352328   | 4,240853 |
| P29692 | Elongation factor 1-delta OS=Homo sapiens OX=9606 GN=EEF1D PE=1 SV=5                                           | -0,259902741 | 4,238784 |
| Q86X55 | Histone-arginine methyltransferase CARM1 OS=Homo sapiens OX=9606 GN=CARM1 PE=1 SV=3                            | -0,353564297 | 4,233794 |
| Q9H078 | Caseinolytic peptidase B protein homolog OS=Homo sapiens OX=9606 GN=CLPB PE=1 SV=1                             | 0,392797879  | 4,23287  |
| O94874 | E3 UFM1-protein ligase 1 OS=Homo sapiens OX=9606 GN=UFL1 PE=1 SV=2                                             | -0,259522556 | 4,230139 |
| P20585 | DNA mismatch repair protein Msh3 OS=Homo sapiens OX=9606 GN=MSH3 PE=1 SV=4                                     | -0,721301023 | 4,228395 |
| Q16512 | Serine/threonine-protein kinase N1 OS=Homo sapiens OX=9606 GN=PKN1 PE=1 SV=2                                   | -0,417212957 | 4,221607 |
| Q4VC31 | Coiled-coil domain-containing protein 58 OS=Homo sapiens OX=9606 GN=CCDC58 PE=1 SV=1                           | 0,719282568  | 4,217064 |
| Q9P227 | #N/D                                                                                                           | -1,051192694 | 4,206867 |
| Q9C035 | Tripartite motif-containing protein 5 OS=Homo sapiens OX=9606 GN=TRIM5 PE=1 SV=1                               | -1,974823825 | 4,205203 |
| P13797 | Plastin-3 OS=Homo sapiens OX=9606 GN=PLS3 PE=1 SV=4                                                            | 0,289352771  | 4,197807 |
| Q9NV52 | 39S ribosomal protein S18a, mitochondrial OS=Homo sapiens OX=9606 GN=MRPS18A PE=1 SV=1                         | -2,58643406  | 4,196247 |
| O60884 | Dnaj homolog subfamily A member 2 OS=Homo sapiens OX=9606 GN=DNAJA2 PE=1 SV=1                                  | 0,321676943  | 4,191192 |
| Q93009 | Ubiquitin carboxyl-terminal hydrolase 7 OS=Homo sapiens OX=9606 GN=USP7 PE=1 SV=2                              | -0,196695336 | 4,18512  |
| P09543 | 2',3'-cyclic-nucleotide 3'-phosphodiesterase OS=Homo sapiens OX=9606 GN=CNP PE=1 SV=2                          | -0,257231823 | 4,178161 |
| Q9NV93 | Probable ATP-dependent RNA helicase DDX56 OS=Homo sapiens OX=9606 GN=DDX56 PE=1 SV=1                           | -0,388498206 | 4,174364 |
| Q9UBP0 | Spastin OS=Homo sapiens OX=9606 GN=SPAST PE=1 SV=1                                                             | 0,906489881  | 4,173293 |
| Q9NVV4 | CXXC motif containing zinc binding protein OS=Homo sapiens OX=9606 GN=CZIB PE=1 SV=1                           | -0,710521952 | 4,167727 |
| Q13616 | Cullin-1 OS=Homo sapiens OX=9606 GN=CUL1 PE=1 SV=2                                                             | -0,27875059  | 4,162181 |
| P60983 | Glia maturation factor beta OS=Homo sapiens OX=9606 GN=GMFB PE=1 SV=2                                          | -0,600005954 | 4,149343 |
| P17844 | Probable ATP-dependent RNA helicase DDX5 OS=Homo sapiens OX=9606 GN=DDX5 PE=1 SV=1                             | -0,233105833 | 4,145183 |
| Q9Y588 | Nucleoside diphosphate kinase 7 OS=Homo sapiens OX=9606 GN=NME7 PE=1 SV=1                                      | 0,705964584  | 4,141959 |
| Q96FJ0 | AMSH-like protease OS=Homo sapiens OX=9606 GN=STAMBPL1 PE=1 SV=2                                               | 0,705926518  | 4,141744 |
| Q6PCE3 | Glucose 1,6-bisphosphate synthase OS=Homo sapiens OX=9606 GN=PGM2L1 PE=1 SV=3                                  | -0,347647337 | 4,14158  |
| O95167 | NADH dehydrogenase [ubiquinone] 1 alpha subcomplex subunit 3 OS=Homo sapiens OX=9606 GN=NDUFA3 PE=1 SV=1       | -0,466274578 | 4,141378 |
| Q60502 | Protein O-GlcNAcase OS=Homo sapiens OX=9606 GN=OGA PE=1 SV=2                                                   | -0,232439196 | 4,128437 |
| Q13177 | Serine/threonine-protein kinase PAK 2 OS=Homo sapiens OX=9606 GN=PAK2 PE=1 SV=3                                | -0,261495665 | 4,121948 |
| P51398 | 28S ribosomal protein S29, mitochondrial OS=Homo sapiens OX=9606 GN=DAP3 PE=1 SV=1                             | -0,439125312 | 4,119904 |
| Q2M389 | WASH complex subunit 4 OS=Homo sapiens OX=9606 GN=WASHC4 PE=1 SV=2                                             | 0,276473432  | 4,115539 |

|        |                                                                                                            |              |          |
|--------|------------------------------------------------------------------------------------------------------------|--------------|----------|
| Q9UNH7 | Sorting nexin-6 OS=Homo sapiens OX=9606 GN=SNX6 PE=1 SV=1                                                  | -0,317274032 | 4,11482  |
| Q15029 | 116 kDa U5 small nuclear ribonucleoprotein component OS=Homo sapiens OX=9606 GN=EFTUD2 PE=1 SV=1           | -0,191440751 | 4,110654 |
| Q9UMS0 | NFU1 iron-sulfur cluster scaffold homolog, mitochondrial OS=Homo sapiens OX=9606 GN=NFU1 PE=1 SV=2         | -0,698594024 | 4,100137 |
| Q96KG9 | N-terminal kinase-like protein OS=Homo sapiens OX=9606 GN=SCYL1 PE=1 SV=1                                  | 0,30444121   | 4,097637 |
| Q6EMK4 | Vasorin OS=Homo sapiens OX=9606 GN=VASN PE=1 SV=1                                                          | 0,696862429  | 4,090285 |
| Q8IZ07 | Ankyrin repeat domain-containing protein 13A OS=Homo sapiens OX=9606 GN=ANKRD13A PE=1 SV=3                 | -0,344181505 | 4,087735 |
| Q8NC51 | Plasminogen activator inhibitor 1 RNA-binding protein OS=Homo sapiens OX=9606 GN=SERBP1 PE=1 SV=2          | -0,235707282 | 4,084117 |
| P30101 | Protein disulfide-isomerase A3 OS=Homo sapiens OX=9606 GN=PDIA3 PE=1 SV=4                                  | 0,2058249    | 4,078582 |
| Q03154 | Aminoacylase-1 OS=Homo sapiens OX=9606 GN=ACY1 PE=1 SV=1                                                   | -0,405615316 | 4,076519 |
| Q8IXI2 | Mitochondrial Rho GTPase 1 OS=Homo sapiens OX=9606 GN=RHOT1 PE=1 SV=2                                      | 0,880474736  | 4,072812 |
| P35237 | Serpin B6 OS=Homo sapiens OX=9606 GN=SERPINB6 PE=1 SV=3                                                    | 0,282824536  | 4,069004 |
| Q9NXT5 | Ethylmalonyl-CoA decarboxylase OS=Homo sapiens OX=9606 GN=ECHDC1 PE=1 SV=2                                 | 0,471504668  | 4,064673 |
| P55809 | Succinyl-CoA:3-ketoacid coenzyme A transferase 1, mitochondrial OS=Homo sapiens OX=9606 GN=OXCT1 PE=1 SV=1 | -0,434179932 | 4,063748 |
| O94905 | Erlin-2 OS=Homo sapiens OX=9606 GN=ERLIN2 PE=1 SV=1                                                        | -0,291992282 | 4,062683 |
| P02511 | Alpha-crystallin B chain OS=Homo sapiens OX=9606 GN=CRYAB PE=1 SV=2                                        | 1,334848021  | 4,054287 |
| Q01889 | HLA class I histocompatibility antigen, B-7 alpha chain OS=Homo sapiens OX=9606 GN=HLA-B PE=1 SV=3         | -0,358776465 | 4,045753 |
| P33992 | DNA replication licensing factor MCM5 OS=Homo sapiens OX=9606 GN=MCM5 PE=1 SV=5                            | -0,204492597 | 4,040833 |
| Q9Y5J5 | Pleckstrin homology-like domain family A member 3 OS=Homo sapiens OX=9606 GN=PHLDA3 PE=1 SV=1              | 0,418871418  | 4,036328 |
| Q9HD15 | Retinoid receptor RNA activator 1 OS=Homo sapiens OX=9606 GN=RA1 PE=1 SV=1                                 | -0,686549862 | 4,031404 |
| O60749 | Sorting nexin-2 OS=Homo sapiens OX=9606 GN=SNX2 PE=1 SV=2                                                  | -0,264480681 | 4,030458 |
| P18669 | Phosphoglycerate mutase 1 OS=Homo sapiens OX=9606 GN=PGAM1 PE=1 SV=2                                       | 0,300444231  | 4,025236 |
| Q9BVJ7 | Dual specificity protein phosphatase 23 OS=Homo sapiens OX=9606 GN=DUSP23 PE=1 SV=1                        | -0,515627856 | 4,022951 |
| Q2NL82 | Pre-rRNA-processing protein TSR1 homolog OS=Homo sapiens OX=9606 GN=TSR1 PE=1 SV=1                         | -0,289862292 | 4,022529 |
| O15031 | Plexin-B2 OS=Homo sapiens OX=9606 GN=PLXNB2 PE=1 SV=3                                                      | 0,311895894  | 4,021963 |
| Q9BV44 | THUMP domain-containing protein 3 OS=Homo sapiens OX=9606 GN=THUMP3 PE=1 SV=1                              | -0,514615682 | 4,014038 |
| Q9H2P0 | Activity-dependent neuroprotector homeobox protein OS=Homo sapiens OX=9606 GN=ADNP PE=1 SV=1               | -0,339338876 | 4,012716 |
| P02545 | Prelamin-A/C OS=Homo sapiens OX=9606 GN=LMNA PE=1 SV=1                                                     | -0,157271193 | 4,010732 |
| Q9Y2R4 | Probable ATP-dependent RNA helicase DDX52 OS=Homo sapiens OX=9606 GN=DDX52 PE=1 SV=3                       | 0,864630302  | 4,010732 |
| Q15738 | Sterol-4-alpha-carboxylate 3-dehydrogenase, decarboxylating OS=Homo sapiens OX=9606 GN=NSDHL PE=1 SV=2     | -0,299161433 | 4,002231 |
| Q6YHU6 | Thyroid adenoma-associated protein OS=Homo sapiens OX=9606 GN=THADA PE=1 SV=1                              | -0,513203005 | 4,001594 |
| P11413 | Glucose-6-phosphate 1-dehydrogenase OS=Homo sapiens OX=9606 GN=G6PD PE=1 SV=4                              | 0,196481492  | 3,996813 |
| Q9C0H2 | Protein tweety homolog 3 OS=Homo sapiens OX=9606 GN=TTYH3 PE=1 SV=3                                        | -0,679742087 | 3,992339 |
| Q14195 | Dihydropyrimidinase-related protein 3 OS=Homo sapiens OX=9606 GN=DPYSL3 PE=1 SV=1                          | -0,231885988 | 3,991218 |
| O14786 | Neurophilin-1 OS=Homo sapiens OX=9606 GN=NRP1 PE=1 SV=3                                                    | -0,427627911 | 3,989399 |
| Q13442 | 28 kDa heat- and acid-stable phosphoprotein OS=Homo sapiens OX=9606 GN=PDAP1 PE=1 SV=1                     | -0,574661088 | 3,96346  |
| Q9Y5Q8 | General transcription factor 3C polypeptide 5 OS=Homo sapiens OX=9606 GN=GTF3C5 PE=1 SV=2                  | -0,352940877 | 3,961026 |
| Q9NVN2 | Histone chaperone ASF1B OS=Homo sapiens OX=9606 GN=ASF1B PE=1 SV=1                                         | -0,850517764 | 3,954868 |
| Q96A49 | Synapse-associated protein 1 OS=Homo sapiens OX=9606 GN=SYAP1 PE=1 SV=1                                    | -0,371775646 | 3,947757 |
| O43175 | D-3-phosphoglycerate dehydrogenase OS=Homo sapiens OX=9606 GN=PHGDH PE=1 SV=4                              | 0,285837785  | 3,946946 |
| Q9BVU0 | Kanadaplin OS=Homo sapiens OX=9606 GN=SLC4A1AP PE=1 SV=1                                                   | 0,371459485  | 3,943888 |
| Q9Y3E7 | Charged multivesicular body protein 3 OS=Homo sapiens OX=9606 GN=CHMP3 PE=1 SV=3                           | -0,570818882 | 3,935107 |
| O95229 | ZW10 interactor OS=Homo sapiens OX=9606 GN=ZW10 PE=1 SV=2                                                  | -0,845244647 | 3,933855 |
| P06400 | Retinoblastoma-associated protein OS=Homo sapiens OX=9606 GN=RB1 PE=1 SV=2                                 | -0,319170434 | 3,926643 |
| P18887 | DNA repair protein XRCC1 OS=Homo sapiens OX=9606 GN=XRCC1 PE=1 SV=2                                        | -0,504504229 | 3,924878 |
| P08174 | Complement decay-accelerating factor OS=Homo sapiens OX=9606 GN=CD55 PE=1 SV=4                             | 0,504490325  | 3,924756 |
| Q8N543 | Prolyl 3-hydroxylase OGFOD1 OS=Homo sapiens OX=9606 GN=OGFOD1 PE=1 SV=1                                    | -0,667724157 | 3,923    |
| P16401 | Histone H1.5 OS=Homo sapiens OX=9606 GN=HIST1H1B PE=1 SV=3                                                 | -0,369731239 | 3,920165 |
| Q6NYC1 | Bifunctional arginine demethylase and lysyl-hydroxylase JMJD6 OS=Homo sapiens OX=9606 GN=JMJD6 PE=1 SV=1   | 0,457152395  | 3,919257 |
| Q9UJ70 | N-acetyl-D-glucosamine kinase OS=Homo sapiens OX=9606 GN=NAGK PE=1 SV=4                                    | -0,275003784 | 3,91615  |
| Q13868 | Exosome complex component RRP4 OS=Homo sapiens OX=9606 GN=EXOSC2 PE=1 SV=2                                 | -0,665266662 | 3,908763 |
| Q15393 | Splicing factor 3B subunit 3 OS=Homo sapiens OX=9606 GN=SF3B3 PE=1 SV=4                                    | -0,17969189  | 3,906259 |
| Q9UKF6 | Cleavage and polyadenylation specificity factor subunit 3 OS=Homo sapiens OX=9606 GN=CPSF3 PE=1 SV=1       | -0,391834187 | 3,904676 |
| Q8TCG1 | Protein CIP2A OS=Homo sapiens OX=9606 GN=CIP2A PE=1 SV=2                                                   | -0,274235454 | 3,90122  |
| P49736 | DNA replication licensing factor MCM2 OS=Homo sapiens OX=9606 GN=MCM2 PE=1 SV=4                            | -0,199329861 | 3,895776 |
| P42704 | Leucine-rich PPR motif-containing protein, mitochondrial OS=Homo sapiens OX=9606 GN=LRPPRC PE=1 SV=3       | -0,136989977 | 3,883386 |
| Q8NEM7 | Transcription factor SPT20 homolog OS=Homo sapiens OX=9606 GN=SPT20H PE=1 SV=2                             | 0,619320513  | 3,879276 |
| Q14004 | Cyclin-dependent kinase 13 OS=Homo sapiens OX=9606 GN=CDK13 PE=1 SV=2                                      | 0,436993371  | 3,875745 |
| P24941 | Cyclin-dependent kinase 2 OS=Homo sapiens OX=9606 GN=CDK2 PE=1 SV=2                                        | -0,291995582 | 3,873644 |
| Q15154 | Pericentriolar material 1 protein OS=Homo sapiens OX=9606 GN=PCM1 PE=1 SV=5                                | -0,231988696 | 3,869575 |
| Q8TC07 | TBC1 domain family member 15 OS=Homo sapiens OX=9606 GN=TBC1D15 PE=1 SV=2                                  | 0,657105401  | 3,861338 |
| P61978 | Heterogeneous nuclear ribonucleoprotein K OS=Homo sapiens OX=9606 GN=HNRNPK PE=1 SV=1                      | -0,216985474 | 3,856978 |
| E7ETH6 | Zinc finger protein 587B OS=Homo sapiens OX=9606 GN=ZNF587B PE=1 SV=1                                      | 1,679656127  | 3,848891 |
| Q9HCD5 | Nuclear receptor coactivator 5 OS=Homo sapiens OX=9606 GN=NCOA5 PE=1 SV=2                                  | 0,495641715  | 3,84657  |
| Q8NEZ5 | F-box only protein 22 OS=Homo sapiens OX=9606 GN=FBXO22 PE=1 SV=1                                          | 0,558851487  | 3,846519 |
| Q6NVY1 | 3-hydroxyisobutyryl-CoA hydrolase, mitochondrial OS=Homo sapiens OX=9606 GN=HIBCH PE=1 SV=2                | 0,414163755  | 3,836782 |
| P17612 | cAMP-dependent protein kinase catalytic subunit alpha OS=Homo sapiens OX=9606 GN=PRKACA PE=1 SV=2          | -0,363081536 | 3,830606 |
| P14735 | Insulin-degrading enzyme OS=Homo sapiens OX=9606 GN=IDE PE=1 SV=4                                          | -0,220275178 | 3,826954 |
| Q9NX40 | OCIA domain-containing protein 1 OS=Homo sapiens OX=9606 GN=OCIA1 PE=1 SV=1                                | -0,447896457 | 3,825434 |
| P31942 | Heterogeneous nuclear ribonucleoprotein H3 OS=Homo sapiens OX=9606 GN=HNRNPH3 PE=1 SV=2                    | -0,362693825 | 3,825393 |
| O95235 | Kinesin-like protein KIF20A OS=Homo sapiens OX=9606 GN=KIF20A PE=1 SV=1                                    | -0,385381945 | 3,824468 |
| Q9H4A4 | Aminopeptidase B OS=Homo sapiens OX=9606 GN=RNPEP PE=1 SV=2                                                | -0,207400368 | 3,822265 |
| P04406 | Glyceraldehyde-3-phosphate dehydrogenase OS=Homo sapiens OX=9606 GN=GAPDH PE=1 SV=3                        | 0,219879562  | 3,817281 |
| Q3ZCQ8 | Mitochondrial import inner membrane translocase subunit TIM50 OS=Homo sapiens OX=9606 GN=TIMM50 PE=1 SV=2  | -0,412274689 | 3,815396 |
| P56192 | Methionine-tRNA ligase, cytoplasmic OS=Homo sapiens OX=9606 GN=MARS PE=1 SV=2                              | 0,224419285  | 3,811782 |
| P28074 | Proteasome subunit beta type-5 OS=Homo sapiens OX=9606 GN=PSMB5 PE=1 SV=3                                  | 0,361604895  | 3,810758 |
| Q9Y3B4 | Splicing factor 3B subunit 6 OS=Homo sapiens OX=9606 GN=SF3B6 PE=1 SV=1                                    | -0,647976169 | 3,808031 |
| O75665 | Oral-facial-digital syndrome 1 protein OS=Homo sapiens OX=9606 GN=OFD1 PE=1 SV=1                           | -0,385283084 | 3,797737 |
| Q14CX7 | N-alpha-acetyltransferase 25, NatB auxiliary subunit OS=Homo sapiens OX=9606 GN=NAA25 PE=1 SV=1            | -0,340928119 | 3,787567 |
| Q9NUQ6 | SPATS2-like protein OS=Homo sapiens OX=9606 GN=SPATS2L PE=1 SV=2                                           | -0,245923663 | 3,78565  |
| Q6P6B7 | Ankyrin repeat domain-containing protein 16 OS=Homo sapiens OX=9606 GN=ANKRD16 PE=1 SV=1                   | -0,963439432 | 3,778834 |
| P52895 | Aldo-keto reductase family 1 member C2 OS=Homo sapiens OX=9606 GN=AKR1C2 PE=1 SV=3                         | 0,297448108  | 3,774979 |
| Q14141 | Septin-6 OS=Homo sapiens OX=9606 GN=SEPTIN6 PE=1 SV=4                                                      | -0,642090419 | 3,773519 |
| Q13740 | CD166 antigen OS=Homo sapiens OX=9606 GN=ALCAM PE=1 SV=2                                                   | 0,251671044  | 3,763673 |
| P51532 | Transcription activator BRG1 OS=Homo sapiens OX=9606 GN=SMARCA4 PE=1 SV=2                                  | -0,266935476 | 3,76018  |
| Q9HSQ4 | Dimethyladenosine transferase 2, mitochondrial OS=Homo sapiens OX=9606 GN=TFB2M PE=1 SV=1                  | -0,801339244 | 3,755923 |
| Q9H0V9 | VIP36-like protein OS=Homo sapiens OX=9606 GN=LMAN2L PE=1 SV=1                                             | 0,485250602  | 3,745483 |
| Q9H357 | Tyrosine-protein phosphatase non-receptor type 23 OS=Homo sapiens OX=9606 GN=PTPN23 PE=1 SV=1              | -0,251142565 | 3,752785 |
| O00291 | Huntingtin-interacting protein 1 OS=Homo sapiens OX=9606 GN=HIP1 PE=1 SV=5                                 | -0,544375263 | 3,738818 |
| Q9NR56 | Sorting nexin-15 OS=Homo sapiens OX=9606 GN=SNX15 PE=1 SV=1                                                | 0,518402039  | 3,737951 |
| Q8IVD9 | NudC domain-containing protein 3 OS=Homo sapiens OX=9606 GN=NUDCD3 PE=1 SV=3                               | -0,30707993  | 3,730868 |
| Q9HSZ1 | Probable ATP-dependent RNA helicase DHX35 OS=Homo sapiens OX=9606 GN=DHX35 PE=1 SV=2                       | 0,639800937  | 3,730613 |

|        |                                                                                                                  |              |          |
|--------|------------------------------------------------------------------------------------------------------------------|--------------|----------|
| P49593 | Protein phosphatase 1F OS=Homo sapiens OX=9606 GN=PPM1F PE=1 SV=3                                                | -0,482499135 | 3,730198 |
| Q12959 | Disks large homolog 1 OS=Homo sapiens OX=9606 GN=DLG1 PE=1 SV=2                                                  | -0,294651314 | 3,727604 |
| P13984 | General transcription factor IIF subunit 2 OS=Homo sapiens OX=9606 GN=GTTF2F PE=1 SV=2                           | -0,437596658 | 3,721029 |
| Q9UBS4 | DnaI homolog subfamily B member 11 OS=Homo sapiens OX=9606 GN=DNAIB11 PE=1 SV=1                                  | 0,35446782   | 3,715044 |
| Q7KZF4 | Staphylococcal nuclease domain-containing protein 1 OS=Homo sapiens OX=9606 GN=SND1 PE=1 SV=1                    | -0,162591549 | 3,706629 |
| Q08AF3 | Schlafen family member 5 OS=Homo sapiens OX=9606 GN=SLFN5 PE=2 SV=1                                              | -1,485594066 | 3,701498 |
| Q9Y375 | Complex I intermediate-associated protein 30, mitochondrial OS=Homo sapiens OX=9606 GN=NDUFAF1 PE=1 SV=2         | 0,921744574  | 3,696641 |
| Q5VT79 | Annexin A8-like protein 1 OS=Homo sapiens OX=9606 GN=ANXA8L1 PE=2 SV=2                                           | -0,304494023 | 3,689289 |
| Q95433 | Activator of 90 kDa heat shock protein ATPase homolog 1 OS=Homo sapiens OX=9606 GN=AHSA1 PE=1 SV=1               | 0,2717651    | 3,685702 |
| Q08257 | Quinone oxidoreductase OS=Homo sapiens OX=9606 GN=CRYZ PE=1 SV=1                                                 | 0,536941252  | 3,683289 |
| Q9H488 | GDP-fucose protein O-fucosyltransferase 1 OS=Homo sapiens OX=9606 GN=POFUT1 PE=1 SV=1                            | -0,400329714 | 3,680351 |
| P48449 | Lanosterol synthase OS=Homo sapiens OX=9606 GN=LSS PE=1 SV=1                                                     | -0,262542593 | 3,676022 |
| P57740 | Nuclear pore complex protein Nup107 OS=Homo sapiens OX=9606 GN=NUP107 PE=1 SV=1                                  | -0,27043263  | 3,66122  |
| Q95104 | SR-related and CTD-associated factor 4 OS=Homo sapiens OX=9606 GN=SCAF4 PE=1 SV=3                                | -0,533948373 | 3,660894 |
| O15270 | Serine palmitoyltransferase 2 OS=Homo sapiens OX=9606 GN=SPTLC2 PE=1 SV=1                                        | 0,622828117  | 3,659796 |
| O00148 | ATP-dependent RNA helicase DDX39A OS=Homo sapiens OX=9606 GN=DDX39A PE=1 SV=2                                    | -0,239911101 | 3,658204 |
| P28799 | Progranulin OS=Homo sapiens OX=9606 GN=GRN PE=1 SV=2                                                             | 0,349943271  | 3,654559 |
| P35612 | Beta-adducin OS=Homo sapiens OX=9606 GN=ADD2 PE=1 SV=3                                                           | -0,253166379 | 3,646994 |
| P02458 | #N/D                                                                                                             |              |          |
| Q9BSY4 | Coiled-coil-helix-coiled-coil-helix domain-containing protein 5 OS=Homo sapiens OX=9606 GN=CHCHD5 PE=1 SV=1      | -1,021058742 | 3,636257 |
| Q9HOA0 | RNA cytidine acetyltransferase OS=Homo sapiens OX=9606 GN=NAT10 PE=1 SV=2                                        | -0,208077385 | 3,635652 |
| Q8N8A6 | ATP-dependent RNA helicase DDX51 OS=Homo sapiens OX=9606 GN=DDX51 PE=1 SV=3                                      | -1,058108236 | 3,630664 |
| Q8TDQ7 | Glucosamine-6-phosphate isomerase 2 OS=Homo sapiens OX=9606 GN=GNDPA2 PE=1 SV=1                                  | -0,771158521 | 3,630483 |
| Q14684 | Ribosomal RNA processing protein 1 homolog B OS=Homo sapiens OX=9606 GN=RRP1B PE=1 SV=3                          | -0,314275894 | 3,628879 |
| Q96120 | PRKC apoptosis WT1 regulator protein OS=Homo sapiens OX=9606 GN=PAWR PE=1 SV=1                                   | 0,395463692  | 3,625439 |
| P27797 | Calreticulin OS=Homo sapiens OX=9606 GN=CALR PE=1 SV=1                                                           | 0,211859997  | 3,623034 |
| Q658P3 | Metalloreductase STEAP3 OS=Homo sapiens OX=9606 GN=STEAP3 PE=1 SV=2                                              | -0,470240417 | 3,621243 |
| O00221 | NF-kappa-B inhibitor epsilon OS=Homo sapiens OX=9606 GN=NFKBIE PE=1 SV=3                                         | 0,428351314  | 3,618599 |
| Q9Y4X5 | E3 ubiquitin-protein ligase ARIH1 OS=Homo sapiens OX=9606 GN=ARIH1 PE=1 SV=2                                     | 0,321121643  | 3,617751 |
| O95372 | AcyI-protein thioesterase 2 OS=Homo sapiens OX=9606 GN=LYPLA2 PE=1 SV=1                                          | 0,368361553  | 3,613787 |
| Q66AY3 | Peptidyl-prolyl cis-trans isomerase FKBP10 OS=Homo sapiens OX=9606 GN=FKBP10 PE=1 SV=1                           | -0,244270147 | 3,61209  |
| O15069 | NAC-alpha domain-containing protein 1 OS=Homo sapiens OX=9606 GN=NACAD PE=1 SV=3                                 | 1,122360909  | 3,605777 |
| O00339 | Matrilin-2 OS=Homo sapiens OX=9606 GN=MATN2 PE=1 SV=4                                                            | 1,208610471  | 3,603807 |
| Q9NZQ3 | NCK-interacting protein with SH3 domain OS=Homo sapiens OX=9606 GN=NCKIPSD PE=1 SV=1                             | -0,966938342 | 3,603159 |
| P62753 | 40S ribosomal protein S6 OS=Homo sapiens OX=9606 GN=RPS6 PE=1 SV=1                                               | 0,39321788   | 3,600118 |
| P28331 | NADH-ubiquinone oxidoreductase 75 kDa subunit, mitochondrial OS=Homo sapiens OX=9606 GN=NDUFS1 PE=1 SV=3         | -0,220294254 | 3,599613 |
| P49792 | E3 SUMO-protein ligase RanBP2 OS=Homo sapiens OX=9606 GN=RANBP2 PE=1 SV=2                                        | -0,155559464 | 3,596516 |
| Q9BVQ7 | Spermatogenesis-associated protein 5-like protein 1 OS=Homo sapiens OX=9606 GN=SPATA5L1 PE=1 SV=2                | 0,252552427  | 3,59274  |
| P36776 | Lon protease homolog, mitochondrial OS=Homo sapiens OX=9606 GN=LONP1 PE=1 SV=2                                   | 0,202262753  | 3,591547 |
| P27695 | DNA-(apurinic or apyrimidinic site) lyase OS=Homo sapiens OX=9606 GN=APEX1 PE=1 SV=2                             | -0,32716271  | 3,590529 |
| Q9ULX3 | RNA-binding protein NOB1 OS=Homo sapiens OX=9606 GN=NOB1 PE=1 SV=1                                               | -0,524227529 | 3,587998 |
| P51858 | Hepatoma-derived growth factor OS=Homo sapiens OX=9606 GN=HDGF PE=1 SV=1                                         | -0,266191335 | 3,583599 |
| Q92995 | Ubiquitin carboxyl-terminal hydrolase 13 OS=Homo sapiens OX=9606 GN=USP13 PE=1 SV=2                              | -0,609964148 | 3,583196 |
| Q8NCF5 | NFATC2-interacting protein OS=Homo sapiens OX=9606 GN=NFATC2IP PE=1 SV=1                                         | -1,123707664 | 3,581545 |
| Q96P11 | Probable 28S rRNA (cytosine-C(5))-methyltransferase OS=Homo sapiens OX=9606 GN=NSUN5 PE=1 SV=2                   | -0,818597997 | 3,578628 |
| Q9Y4C2 | TRPM8 channel-associated factor 1 OS=Homo sapiens OX=9606 GN=TCAF1 PE=1 SV=3                                     | -0,326194223 | 3,576741 |
| P61513 | 60S ribosomal protein L37a OS=Homo sapiens OX=9606 GN=RPL37A PE=1 SV=2                                           | -0,608206659 | 3,572691 |
| P13489 | Ribonuclease inhibitor OS=Homo sapiens OX=9606 GN=RNH1 PE=1 SV=2                                                 | 0,21870971   | 3,563544 |
| Q95239 | Chromosome-associated kinesin KIF4A OS=Homo sapiens OX=9606 GN=KIF4A PE=1 SV=3                                   | -0,223676661 | 3,559291 |
| O43592 | Exportin-T OS=Homo sapiens OX=9606 GN=XPOT PE=1 SV=2                                                             | 0,223440588  | 3,553989 |
| Q4G0J3 | La-related protein 7 OS=Homo sapiens OX=9606 GN=LARP7 PE=1 SV=1                                                  | -0,518837414 | 3,547479 |
| Q95347 | Structural maintenance of chromosomes protein 2 OS=Homo sapiens OX=9606 GN=SMC2 PE=1 SV=2                        | -0,163406143 | 3,539331 |
| Q69YN2 | CWF19-like protein 1 OS=Homo sapiens OX=9606 GN=CWF19L1 PE=1 SV=2                                                | -0,460839362 | 3,537899 |
| P19387 | DNA-directed RNA polymerase II subunit RPB3 OS=Homo sapiens OX=9606 GN=POLR2C PE=1 SV=2                          | -0,516110059 | 3,526951 |
| Q86U44 | N6-adenosine-methyltransferase catalytic subunit OS=Homo sapiens OX=9606 GN=METT13 PE=1 SV=2                     | 0,314655247  | 3,522415 |
| P49418 | Amphiphysin OS=Homo sapiens OX=9606 GN=AMPH PE=1 SV=1                                                            | 0,339848304  | 3,520187 |
| Q9618  | Leucine-rich repeat and calponin homology domain-containing protein 3 OS=Homo sapiens OX=9606 GN=LRCH3 PE=1 SV=1 | 0,417368156  | 3,516122 |
| Q13619 | Cullin-4A OS=Homo sapiens OX=9606 GN=CUL4A PE=1 SV=3                                                             | 0,281941742  | 3,51421  |
| P49903 | Selenide, water dikinase 1 OS=Homo sapiens OX=9606 GN=SEPHS1 PE=1 SV=2                                           | 0,383480555  | 3,490513 |
| O94822 | E3 ubiquitin-protein ligase listerin OS=Homo sapiens OX=9606 GN=LTN1 PE=1 SV=6                                   | 0,226005024  | 3,490276 |
| O43488 | Aflatoxin B1 aldehyde reductase member 2 OS=Homo sapiens OX=9606 GN=AKR7A2 PE=1 SV=3                             | -0,45502426  | 3,486191 |
| A0JNW5 | UHRF1-binding protein 1-like OS=Homo sapiens OX=9606 GN=UHRF1BP1L PE=1 SV=2                                      | 0,72015227   | 3,482057 |
| Q96EK7 | Constitutive coactivator of peroxisome proliferator-activated receptor gamma OS=Homo sapiens OX=9606 GN=FAM120B  | -0,876818331 | 3,475683 |
| Q02218 | 2-oxoglutarate dehydrogenase, mitochondrial OS=Homo sapiens OX=9606 GN=OGDH PE=1 SV=3                            | -0,190334706 | 3,473596 |
| P17096 | High mobility group protein HMG-I/HMG-Y OS=Homo sapiens OX=9606 GN=HMGA1 PE=1 SV=3                               | -0,73257828  | 3,466357 |
| Q16537 | Serine/threonine-protein phosphatase 2A 56 kDa regulatory subunit epsilon isoform OS=Homo sapiens OX=9606 GN=PPP | -0,452135868 | 3,460497 |
| Q95352 | Ubiquitin-like modifier-activating enzyme ATG7 OS=Homo sapiens OX=9606 GN=ATG7 PE=1 SV=1                         | -0,355751072 | 3,45867  |
| Q15477 | Helicase SKI2W OS=Homo sapiens OX=9606 GN=SKI2L PE=1 SV=3                                                        | -0,411471821 | 3,456464 |
| Q16270 | Insulin-like growth factor-binding protein 7 OS=Homo sapiens OX=9606 GN=IGFBP7 PE=1 SV=1                         | 0,451336784  | 3,453388 |
| Q14966 | Zinc finger protein 638 OS=Homo sapiens OX=9606 GN=ZNF638 PE=1 SV=2                                              | 0,506261065  | 3,452683 |
| Q68C22 | Tensin-3 OS=Homo sapiens OX=9606 GN=TNS3 PE=1 SV=2                                                               | -0,213684714 | 3,44998  |
| Q9UPY8 | Microtubule-associated protein RP/EB family member 3 OS=Homo sapiens OX=9606 GN=MAPRE3 PE=1 SV=1                 | 0,379772909  | 3,448862 |
| Q8TC22 | CD99 antigen-like protein 2 OS=Homo sapiens OX=9606 GN=CD99L2 PE=1 SV=1                                          | -0,587595836 | 3,448791 |
| Q9GZM5 | Protein YIPF3 OS=Homo sapiens OX=9606 GN=YIPF3 PE=1 SV=1                                                         | -1,050625083 | 3,439369 |
| Q95302 | Peptidyl-prolyl cis-trans isomerase FKBP9 OS=Homo sapiens OX=9606 GN=FKBP9 PE=1 SV=2                             | -0,249583813 | 3,431022 |
| Q2TAL8 | Glutamine-rich protein 1 OS=Homo sapiens OX=9606 GN=QRICH1 PE=1 SV=1                                             | -0,332975527 | 3,429194 |
| Q95340 | Bifunctional 3'-phosphoadenosine 5'-phosphosulfate synthase 2 OS=Homo sapiens OX=9606 GN=PAPSS2 PE=1 SV=2        | 0,191962037  | 3,426627 |
| Q9NZ08 | Endoplasmic reticulum aminopeptidase 1 OS=Homo sapiens OX=9606 GN=ERAP1 PE=1 SV=3                                | -0,28792836  | 3,425555 |
| P62910 | 60S ribosomal protein L32 OS=Homo sapiens OX=9606 GN=RPL32 PE=1 SV=2                                             | -0,352522437 | 3,419107 |
| P26368 | Splicing factor U2AF 65 kDa subunit OS=Homo sapiens OX=9606 GN=U2AF2 PE=1 SV=4                                   | -0,275899379 | 3,413893 |
| O43299 | AP-5 complex subunit zeta-1 OS=Homo sapiens OX=9606 GN=AP5Z1 PE=1 SV=2                                           | -0,535499064 | 3,410555 |
| Q9UDY8 | Mucosa-associated lymphoid tissue lymphoma translocation protein 1 OS=Homo sapiens OX=9606 GN=MALT1 PE=1 SV=1    | 0,350844165  | 3,398567 |
| P78347 | General transcription factor II-I OS=Homo sapiens OX=9606 GN=GTF2I PE=1 SV=2                                     | -0,158820656 | 3,398139 |
| P37802 | Transgelin-2 OS=Homo sapiens OX=9606 GN=TAGLN2 PE=1 SV=3                                                         | 0,211366574  | 3,398016 |
| P46379 | Large proline-rich protein BAG6 OS=Homo sapiens OX=9606 GN=BAG6 PE=1 SV=2                                        | -0,221652743 | 3,397624 |
| O43824 | Putative GTP-binding protein 6 OS=Homo sapiens OX=9606 GN=GTPBP6 PE=2 SV=4                                       | -0,73510046  | 3,391686 |
| P40692 | DNA mismatch repair protein Mlh1 OS=Homo sapiens OX=9606 GN=MLH1 PE=1 SV=1                                       | -0,330124814 | 3,391574 |
| P78417 | Glutathione S-transferase omega-1 OS=Homo sapiens OX=9606 GN=GSTO1 PE=1 SV=2                                     | -0,273122619 | 3,368048 |
| Q9UKV5 | E3 ubiquitin-protein ligase AMFR OS=Homo sapiens OX=9606 GN=AMFR PE=1 SV=2                                       | -0,889774622 | 3,365167 |
| P18754 | Regulator of chromosome condensation OS=Homo sapiens OX=9606 GN=RCC1 PE=1 SV=1                                   | -0,440523578 | 3,357154 |
| P68032 | Actin, alpha cardiac muscle 1 OS=Homo sapiens OX=9606 GN=ACTC1 PE=1 SV=1                                         | 0,707111736  | 3,355673 |

|        |                                                                                                                     |               |          |
|--------|---------------------------------------------------------------------------------------------------------------------|---------------|----------|
| Q86V21 | Acetoacetyl-CoA synthetase OS=Homo sapiens OX=9606 GN=AACS PE=1 SV=1                                                | -0,347167659  | 3,353636 |
| Q81WZ3 | Ankyrin repeat and KH domain-containing protein 1 OS=Homo sapiens OX=9606 GN=ANKHD1 PE=1 SV=1                       | -0,271612778  | 3,343189 |
| P29372 | DNA-3-methyladenine glycosylase OS=Homo sapiens OX=9606 GN=MPG PE=1 SV=3                                            | -0,570190422  | 3,343178 |
| Q86Y56 | Dynein assembly factor 5, axonemal OS=Homo sapiens OX=9606 GN=DNAAF5 PE=1 SV=4                                      | -0,208901172  | 3,343049 |
| Q32P28 | Prolyl 3-hydroxylase 1 OS=Homo sapiens OX=9606 GN=P3H1 PE=1 SV=2                                                    | 0,230613638   | 3,337544 |
| Q6P9B6 | MTOR-associated protein MEAK7 OS=Homo sapiens OX=9606 GN=MEAK7 PE=1 SV=2                                            | 0,437737314   | 3,332349 |
| Q86Y37 | CDK2-associated and cullin domain-containing protein 1 OS=Homo sapiens OX=9606 GN=CACUL1 PE=1 SV=1                  | -0,568254265  | 3,331375 |
| O94763 | Unconventional prefoldin RPB5 interactor 1 OS=Homo sapiens OX=9606 GN=URI1 PE=1 SV=3                                | -0,568009216  | 3,329881 |
| Q04206 | Transcription factor p65 OS=Homo sapiens OX=9606 GN=RELA PE=1 SV=2                                                  | -0,344267136  | 3,318252 |
| Q9Y5Z7 | Host cell factor 2 OS=Homo sapiens OX=9606 GN=HCFC2 PE=1 SV=1                                                       | 1,014502957   | 3,316483 |
| Q5VZM2 | Ras-related GTP-binding protein B OS=Homo sapiens OX=9606 GN=RRAGB PE=1 SV=1                                        | 0,301922209   | 3,315759 |
| Q53GL7 | Protein mono-ADP-ribosyltransferase PARP10 OS=Homo sapiens OX=9606 GN=PARP10 PE=1 SV=2                              | 0,998796518   | 3,313811 |
| O94979 | Protein transport protein Sec31A OS=Homo sapiens OX=9606 GN=SEC31A PE=1 SV=3                                        | 0,172160184   | 3,312131 |
| Q9Y277 | Voltage-dependent anion-selective channel protein 3 OS=Homo sapiens OX=9606 GN=VDAC3 PE=1 SV=1                      | 0,307405562   | 3,311372 |
| Q9UIQ6 | Leucyl-cystinyl aminopeptidase OS=Homo sapiens OX=9606 GN=LNPEP PE=1 SV=3                                           | -0,242989869  | 3,308299 |
| P13473 | Lysosome-associated membrane glycoprotein 2 OS=Homo sapiens OX=9606 GN=LAMP2 PE=1 SV=2                              | 0,694459175   | 3,299985 |
| Q00577 | Transcriptional activator protein Pur-alpha OS=Homo sapiens OX=9606 GN=PURA PE=1 SV=2                               | -0,395707016  | 3,297208 |
| Q9UH86 | LIM domain and actin-binding protein 1 OS=Homo sapiens OX=9606 GN=LIMA1 PE=1 SV=1                                   | 0,211218269   | 3,287185 |
| Q13439 | Golgin subfamily A member 4 OS=Homo sapiens OX=9606 GN=GOLGA4 PE=1 SV=1                                             | 0,201790332   | 3,285551 |
| P13010 | X-ray repair cross-complementing protein 5 OS=Homo sapiens OX=9606 GN=XRCC5 PE=1 SV=3                               | -0,159227904  | 3,285383 |
| Q9BTE3 | Mini-chromosome maintenance complex-binding protein OS=Homo sapiens OX=9606 GN=MCMBP PE=1 SV=2                      | -0,258347523  | 3,284931 |
| P78346 | Ribonuclease P protein subunit p30 OS=Homo sapiens OX=9606 GN=PPP30 PE=1 SV=1                                       | -0,432295383  | 3,283899 |
| Q86W11 | Fibrocystin-L OS=Homo sapiens OX=9606 GN=PKHD1L1 PE=2 SV=2                                                          | 0,82660843    | 3,279395 |
| P82650 | 28S ribosomal protein S22, mitochondrial OS=Homo sapiens OX=9606 GN=MRPS22 PE=1 SV=1                                | -0,483036246  | 3,276764 |
| P14854 | Cytochrome c oxidase subunit 6B1 OS=Homo sapiens OX=9606 GN=COX6B1 PE=1 SV=2                                        | 0,687480377   | 3,269702 |
| Q9NUL3 | Double-stranded RNA-binding protein Staufin homolog 2 OS=Homo sapiens OX=9606 GN=STAU2 PE=1 SV=2                    | 0,555633735   | 3,254186 |
| Q5JSZ5 | Protein PRRC2B OS=Homo sapiens OX=9606 GN=PRRC2B PE=1 SV=2                                                          | -0,683689377  | 3,252122 |
| O15397 | Importin-8 OS=Homo sapiens OX=9606 GN=IPO8 PE=1 SV=2                                                                | -0,266036731  | 3,251807 |
| P26006 | Integrin alpha-3 OS=Homo sapiens OX=9606 GN=ITGA3 PE=1 SV=5                                                         | -0,204748732  | 3,251171 |
| Q9Y512 | Sorting and assembly machinery component 50 homolog OS=Homo sapiens OX=9606 GN=SAMM50 PE=1 SV=3                     | 0,554298041   | 3,245991 |
| P16615 | Sarcoplasmic/endoplasmic reticulum calcium ATPase 2 OS=Homo sapiens OX=9606 GN=ATP2A2 PE=1 SV=1                     | 0,199867371   | 3,242097 |
| P26639 | Threonine--tRNA ligase, cytoplasmic OS=Homo sapiens OX=9606 GN=TARS PE=1 SV=3                                       | 0,166943691   | 3,24066  |
| Q9Y570 | Protein phosphatase methylesterase 1 OS=Homo sapiens OX=9606 GN=PPME1 PE=1 SV=3                                     | 0,231779667   | 3,232329 |
| P68371 | Tubulin beta-4B chain OS=Homo sapiens OX=9606 GN=TUBB4B PE=1 SV=1                                                   | -0,313519694  | 3,228434 |
| Q9UFC0 | Leucine-rich repeat and WD repeat-containing protein 1 OS=Homo sapiens OX=9606 GN=LRWD1 PE=1 SV=2                   | 0,550512882   | 3,222741 |
| O94808 | Glutamine--fructose-6-phosphate aminotransferase [isomerizing] 2 OS=Homo sapiens OX=9606 GN=GFPT2 PE=1 SV=3         | -0,264242646  | 3,222551 |
| Q8NB05 | ATPase family AAA domain-containing protein 1 OS=Homo sapiens OX=9606 GN=ATAD1 PE=1 SV=1                            | -0,475717357  | 3,221123 |
| Q8N128 | Protein FAM177A1 OS=Homo sapiens OX=9606 GN=FAM177A1 PE=1 SV=1                                                      | 0,897635448   | 3,217496 |
| Q9H853 | Putative tubulin-like protein alpha-4B OS=Homo sapiens OX=9606 GN=TUBA4B PE=5 SV=2                                  | 1,878710037   | 3,215191 |
| P61221 | ATP-binding cassette sub-family E member 1 OS=Homo sapiens OX=9606 GN=ABCE1 PE=1 SV=1                               | -0,212891942  | 3,213657 |
| Q15910 | Histone-lysine N-methyltransferase EZH2 OS=Homo sapiens OX=9606 GN=EZH2 PE=1 SV=2                                   | -0,674307341  | 3,210336 |
| Q96RL7 | Vacuolar protein sorting-associated protein 13A OS=Homo sapiens OX=9606 GN=VPS13A PE=1 SV=2                         | 0,274097912   | 3,209089 |
| O95865 | N(G),N(G)-dimethylarginine dimethylaminohydrolase 2 OS=Homo sapiens OX=9606 GN=DDAH2 PE=1 SV=1                      | 0,299511845   | 3,201169 |
| Q86X02 | Cerebellar degeneration-related protein 2-like OS=Homo sapiens OX=9606 GN=CDR2L PE=1 SV=2                           | -0,72634613   | 3,198286 |
| Q9Y6W5 | Wiskott-Aldrich syndrome protein family member 2 OS=Homo sapiens OX=9606 GN=WASF2 PE=1 SV=3                         | 0,315370285   | 3,192745 |
| P37235 | Hippocalcin-like protein 1 OS=Homo sapiens OX=9606 GN=HPCAL1 PE=1 SV=3                                              | -0,385187804  | 3,191205 |
| P06865 | Beta-hexosaminidase subunit alpha OS=Homo sapiens OX=9606 GN=HEXA PE=1 SV=2                                         | -0,4211732448 | 3,189553 |
| P31948 | Stress-induced-phosphoprotein 1 OS=Homo sapiens OX=9606 GN=STIP1 PE=1 SV=1                                          | 0,153854807   | 3,188743 |
| P52292 | Immunin subunit alpha-1 OS=Homo sapiens OX=9606 GN=KPNA2 PE=1 SV=1                                                  | -0,23642679   | 3,187503 |
| Q08209 | Serine/threonine-protein phosphatase 2B catalytic subunit alpha isoform OS=Homo sapiens OX=9606 GN=PPP3CA PE=1 SV=1 | -0,470227656  | 3,179333 |
| Q8IVH2 | Forkhead box protein P4 OS=Homo sapiens OX=9606 GN=FOXP4 PE=1 SV=1                                                  | -0,834677688  | 3,173035 |
| Q15942 | Zyxin OS=Homo sapiens OX=9606 GN=ZYX PE=1 SV=1                                                                      | -0,243190221  | 3,171075 |
| Q14562 | ATP-dependent RNA helicase DHX8 OS=Homo sapiens OX=9606 GN=DHX8 PE=1 SV=1                                           | -0,419533954  | 3,170282 |
| Q9BPX3 | Condensin complex subunit 3 OS=Homo sapiens OX=9606 GN=NCAPG PE=1 SV=1                                              | -0,181491651  | 3,167389 |
| P35610 | Sterol O-acyltransferase 1 OS=Homo sapiens OX=9606 GN=SOAT1 PE=1 SV=3                                               | 0,354491084   | 3,166325 |
| Q9BQ61 | Telomerase RNA component interacting RNase OS=Homo sapiens OX=9606 GN=TRIR PE=1 SV=1                                | -0,541350863  | 3,166305 |
| Q9NPL8 | Complex I assembly factor TIMMDC1, mitochondrial OS=Homo sapiens OX=9606 GN=TIMMDC1 PE=1 SV=2                       | -0,939542652  | 3,164405 |
| Q6L8Q7 | 2',5'-phosphodiesterase 12 OS=Homo sapiens OX=9606 GN=PDE12 PE=1 SV=2                                               | 0,540133719   | 3,158791 |
| P50225 | Sulfotransferase 1A1 OS=Homo sapiens OX=9606 GN=SULT1A1 PE=1 SV=3                                                   | -0,417778089  | 3,154652 |
| Q07065 | Cytoskeleton-associated protein 4 OS=Homo sapiens OX=9606 GN=CKAP4 PE=1 SV=2                                        | 0,163723126   | 3,152821 |
| P62277 | 40S ribosomal protein S13 OS=Homo sapiens OX=9606 GN=RPS13 PE=1 SV=2                                                | -0,330189254  | 3,147361 |
| P52298 | Nuclear cap-binding protein subunit 2 OS=Homo sapiens OX=9606 GN=NCBP2 PE=1 SV=1                                    | 0,46581513    | 3,14571  |
| P43155 | Carnitine O-acetyltransferase OS=Homo sapiens OX=9606 GN=CRAT PE=1 SV=5                                             | -0,295338921  | 3,143242 |
| Q9NNX1 | Tuftelin OS=Homo sapiens OX=9606 GN=TUFT1 PE=1 SV=1                                                                 | -0,537193404  | 3,140623 |
| Q9BRU6 | Uncharacterized protein C7orf50 OS=Homo sapiens OX=9606 GN=C7orf50 PE=1 SV=1                                        | -0,536760883  | 3,137949 |
| P61289 | Proteasome activator complex subunit 3 OS=Homo sapiens OX=9606 GN=PSME3 PE=1 SV=1                                   | -0,294539151  | 3,132167 |
| Q9Y617 | Phosphoserine aminotransferase OS=Homo sapiens OX=9606 GN=PSAT1 PE=1 SV=2                                           | 0,226307389   | 3,128756 |
| P61225 | Ras-related protein Rap-2b OS=Homo sapiens OX=9606 GN=RAP2B PE=1 SV=1                                               | -0,925559189  | 3,128193 |
| Q9Y5K6 | CD2-associated protein OS=Homo sapiens OX=9606 GN=CD2AP PE=1 SV=1                                                   | 0,463182426   | 3,125636 |
| Q8TEX9 | Importin-4 OS=Homo sapiens OX=9606 GN=IPO4 PE=1 SV=2                                                                | -0,208531648  | 3,123385 |
| P28838 | Cytosol aminopeptidase OS=Homo sapiens OX=9606 GN=LAP3 PE=1 SV=3                                                    | -0,268224726  | 3,118264 |
| P51153 | Ras-related protein Rab-13 OS=Homo sapiens OX=9606 GN=RAB13 PE=1 SV=1                                               | -0,65329505   | 3,115613 |
| P23588 | Eukaryotic translation initiation factor 4B OS=Homo sapiens OX=9606 GN=EIF4B PE=1 SV=2                              | -0,208085855  | 3,114205 |
| Q14332 | Frizzled-2 OS=Homo sapiens OX=9606 GN=FZD2 PE=1 SV=1                                                                | -0,651530301  | 3,107612 |
| O43390 | Heterogeneous nuclear ribonucleoprotein R OS=Homo sapiens OX=9606 GN=HNRNPR PE=1 SV=1                               | -0,207702493  | 3,106317 |
| O95373 | Importin-7 OS=Homo sapiens OX=9606 GN=IPO7 PE=1 SV=1                                                                | 0,155076874   | 3,104294 |
| P02751 | Fibronectin OS=Homo sapiens OX=9606 GN=FN1 PE=1 SV=4                                                                | 0,30801516    | 3,102474 |
| Q0VDF9 | Heat shock 70 kDa protein 14 OS=Homo sapiens OX=9606 GN=HSPA14 PE=1 SV=1                                            | -0,247415938  | 3,099548 |
| Q6P587 | Acylpyruvate FAHD1, mitochondrial OS=Homo sapiens OX=9606 GN=FAHD1 PE=1 SV=2                                        | -0,649609333  | 3,098867 |
| Q9H1E5 | Thioredoxin-related transmembrane protein 4 OS=Homo sapiens OX=9606 GN=TMX4 PE=1 SV=1                               | -0,913839645  | 3,097554 |
| P48060 | Glioma pathogenesis-related protein 1 OS=Homo sapiens OX=9606 GN=GLIPR1 PE=1 SV=3                                   | 1,298500916   | 3,096635 |
| P51580 | Thiopurine S-methyltransferase OS=Homo sapiens OX=9606 GN=TPMT PE=1 SV=1                                            | -0,529731671  | 3,094419 |
| Q96P20 | Pseudouridylylase synthase 7 homolog OS=Homo sapiens OX=9606 GN=PU57 PE=1 SV=2                                      | -0,912545464  | 3,094154 |
| O75380 | NADH dehydrogenase [ubiquinone] iron-sulfur protein 6, mitochondrial OS=Homo sapiens OX=9606 GN=NDUF56 PE=1 SV=1    | -0,648403437  | 3,093379 |
| Q9NYV4 | Cyclin-dependent kinase 12 OS=Homo sapiens OX=9606 GN=CDK12 PE=1 SV=2                                               | -0,386066211  | 3,092857 |
| P07996 | Thrombospondin-1 OS=Homo sapiens OX=9606 GN=THBS1 PE=1 SV=2                                                         | 0,231201351   | 3,092317 |
| O95166 | Gamma-aminobutyric acid receptor-associated protein OS=Homo sapiens OX=9606 GN=GABARAP PE=1 SV=1                    | 0,399037738   | 3,091759 |
| Q8WY22 | BRI3-binding protein OS=Homo sapiens OX=9606 GN=BRI3BP PE=1 SV=1                                                    | -0,462295067  | 3,091495 |
| P30260 | Cell division cycle protein 27 homolog OS=Homo sapiens OX=9606 GN=CDC27 PE=1 SV=2                                   | 0,375164542   | 3,09045  |
| O14950 | Myosin regulatory light chain 12B OS=Homo sapiens OX=9606 GN=MYL12B PE=1 SV=2                                       | 0,306926342   | 3,088367 |
| Q9Y5K5 | Ubiquitin carboxyl-terminal hydrolase isozyme L5 OS=Homo sapiens OX=9606 GN=UCHL5 PE=1 SV=3                         | -0,277835409  | 3,086327 |

|        |                                                                                                             |              |          |
|--------|-------------------------------------------------------------------------------------------------------------|--------------|----------|
| P78330 | Phosphoserine phosphatase OS=Homo sapiens OX=9606 GN=PSPH PE=1 SV=2                                         | 0,457257588  | 3,080428 |
| Q9NUJ3 | T-complex protein 11-like protein 1 OS=Homo sapiens OX=9606 GN=TCP11L1 PE=1 SV=1                            | 0,346559242  | 3,078301 |
| Q7L2E3 | ATP-dependent RNA helicase DHX30 OS=Homo sapiens OX=9606 GN=DHX30 PE=1 SV=1                                 | -0,181130317 | 3,077096 |
| Q9Y2S7 | Polymerase delta-interacting protein 2 OS=Homo sapiens OX=9606 GN=POLDIP2 PE=1 SV=1                         | -0,373824708 | 3,077003 |
| Q9H7B2 | Ribosome production factor 2 homolog OS=Homo sapiens OX=9606 GN=RPF2 PE=1 SV=2                              | -0,526848938 | 3,076531 |
| Q02750 | Dual specificity mitogen-activated protein kinase kinase 1 OS=Homo sapiens OX=9606 GN=MAP2K1 PE=1 SV=2      | 0,346349394  | 3,075976 |
| Q9BQ39 | DNA-dependent RNA helicase DDX50 OS=Homo sapiens OX=9606 GN=DDX50 PE=1 SV=1                                 | -0,255170252 | 3,075719 |
| Q9Y679 | Ancient ubiquitous protein 1 OS=Homo sapiens OX=9606 GN=AUP1 PE=1 SV=2                                      | -0,456215393 | 3,072471 |
| P42566 | Epidermal growth factor receptor substrate 15 OS=Homo sapiens OX=9606 GN=EPS15 PE=1 SV=2                    | 0,276837988  | 3,071773 |
| Q92558 | Wiskott-Aldrich syndrome protein family member 1 OS=Homo sapiens OX=9606 GN=WASF1 PE=1 SV=1                 | -1,213011166 | 3,07138  |
| Q13043 | Serine/threonine-protein kinase 4 OS=Homo sapiens OX=9606 GN=STK4 PE=1 SV=2                                 | -0,323568205 | 3,067511 |
| Q9H4L5 | Oxysterol-binding protein-related protein 3 OS=Homo sapiens OX=9606 GN=OSBPL3 PE=1 SV=1                     | 0,407880882  | 3,066579 |
| Q9C0B0 | RING finger protein unknempt homolog OS=Homo sapiens OX=9606 GN=UNK PE=1 SV=2                               | 0,642258692  | 3,065353 |
| Q9NYL9 | Tropomodulin-3 OS=Homo sapiens OX=9606 GN=TMOD3 PE=1 SV=1                                                   | 0,237065498  | 3,063759 |
| A5PLN9 | Trafficking protein particle complex subunit 13 OS=Homo sapiens OX=9606 GN=TRAPPC13 PE=1 SV=2               | -0,900918704 | 3,063465 |
| P78527 | DNA-dependent protein kinase catalytic subunit OS=Homo sapiens OX=9606 GN=PRKDC PE=1 SV=3                   | -0,070240109 | 3,061061 |
| O94855 | Protein transport protein Sec24D OS=Homo sapiens OX=9606 GN=SEC24D PE=1 SV=2                                | 0,288819441  | 3,053218 |
| P57764 | Gasdermin-D OS=Homo sapiens OX=9606 GN=GSDMD PE=1 SV=1                                                      | -0,371311267 | 3,051791 |
| Q03164 | Histone-lysine N-methyltransferase 2A OS=Homo sapiens OX=9606 GN=KMT2A PE=1 SV=5                            | -0,602367036 | 3,051233 |
| Q723E5 | LisH domain-containing protein ARMC9 OS=Homo sapiens OX=9606 GN=ARMC9 PE=1 SV=3                             | 0,406109165  | 3,050819 |
| P52732 | Kinesin-like protein KIF11 OS=Homo sapiens OX=9606 GN=KIF11 PE=1 SV=2                                       | -0,236152045 | 3,047849 |
| Q9NR09 | Baculoviral IAP repeat-containing protein 6 OS=Homo sapiens OX=9606 GN=BIRC6 PE=1 SV=2                      | -0,141759429 | 3,047036 |
| O43395 | U4/U6 small nuclear ribonucleoprotein Prp3 OS=Homo sapiens OX=9606 GN=PRPF3 PE=1 SV=2                       | -0,263582504 | 3,046961 |
| P60981 | Destrin OS=Homo sapiens OX=9606 GN=DSTN PE=1 SV=3                                                           | 0,274963792  | 3,044471 |
| Q9Y2B9 | cAMP-dependent protein kinase inhibitor gamma OS=Homo sapiens OX=9606 GN=PKIG PE=2 SV=1                     | -0,906199019 | 3,042702 |
| Q9UJ50 | Calcium-binding mitochondrial carrier protein Aralar2 OS=Homo sapiens OX=9606 GN=SLC25A13 PE=1 SV=2         | -0,303363742 | 3,042303 |
| Q9H9J2 | 39S ribosomal protein L44, mitochondrial OS=Homo sapiens OX=9606 GN=MRPL44 PE=1 SV=1                        | -0,521100585 | 3,0408   |
| Q16186 | Proteasomal ubiquitin receptor ADRM1 OS=Homo sapiens OX=9606 GN=ADRM1 PE=1 SV=2                             | 0,342970601  | 3,038587 |
| Q8TB61 | Adenosine 3'-phospho 5'-phosphosulfate transporter 1 OS=Homo sapiens OX=9606 GN=SLC35B2 PE=1 SV=1           | -0,369906604 | 3,03771  |
| Q9UJZ1 | Stomatin-like protein 2, mitochondrial OS=Homo sapiens OX=9606 GN=STOML2 PE=1 SV=1                          | -0,342754486 | 3,036198 |
| Q01658 | Protein Dr1 OS=Homo sapiens OX=9606 GN=DR1 PE=1 SV=1                                                        | -0,890465835 | 3,035647 |
| P61758 | Prefoldin subunit 3 OS=Homo sapiens OX=9606 GN=VBP1 PE=1 SV=4                                               | -0,342570643 | 3,034165 |
| Q9NPA0 | ER membrane protein complex subunit 7 OS=Homo sapiens OX=9606 GN=EMC7 PE=1 SV=1                             | -0,888882567 | 3,031414 |
| O43324 | Eukaryotic translation elongation factor 1 epsilon-1 OS=Homo sapiens OX=9606 GN=EEF1E1 PE=1 SV=1            | -0,369110455 | 3,029731 |
| Q15274 | Nicotinate-nucleotide pyrophosphorylase [carboxylating] OS=Homo sapiens OX=9606 GN=QPRT PE=1 SV=3           | -0,368968816 | 3,028312 |
| P25686 | DnaJ homolog subfamily B member 2 OS=Homo sapiens OX=9606 GN=DNAJB2 PE=1 SV=3                               | 0,886719251  | 3,025623 |
| Q96603 | Phosphoglucomutase-2 OS=Homo sapiens OX=9606 GN=PGM2 PE=1 SV=4                                              | -0,301889948 | 3,023288 |
| P62750 | 60S ribosomal protein L23a OS=Homo sapiens OX=9606 GN=RPL23A PE=1 SV=1                                      | -0,319573765 | 3,019512 |
| O75643 | U5 small nuclear ribonucleoprotein 200 kDa helicase OS=Homo sapiens OX=9606 GN=SNRNP200 PE=1 SV=2           | -0,099729302 | 3,018067 |
| Q9H3R5 | Centromere protein H OS=Homo sapiens OX=9606 GN=CENPH PE=1 SV=1                                             | -0,882552324 | 3,014396 |
| P40123 | Adenylyl cyclase-associated protein 2 OS=Homo sapiens OX=9606 GN=CAP2 PE=1 SV=1                             | 0,251107328  | 3,010582 |
| P62937 | Peptidyl-prolyl cis-trans isomerase A OS=Homo sapiens OX=9606 GN=PIPA PE=1 SV=2                             | 0,261135519  | 3,009551 |
| Q92636 | Protein FAN OS=Homo sapiens OX=9606 GN=NSMAF PE=1 SV=2                                                      | -0,875074109 | 3,009485 |
| Q9BV20 | Methylthioribose-1-phosphate isomerase OS=Homo sapiens OX=9606 GN=MR11 PE=1 SV=1                            | 0,629243183  | 3,005634 |
| Q96HA8 | Protein N-terminal glutamine amidohydrolase OS=Homo sapiens OX=9606 GN=WDYHV1 PE=1 SV=2                     | -0,838660044 | 3,005621 |
| Q7L273 | BTB/POZ domain-containing protein KCTD9 OS=Homo sapiens OX=9606 GN=KCTD9 PE=1 SV=1                          | 0,628639587  | 3,002853 |
| Q14527 | Helicase-like transcription factor OS=Homo sapiens OX=9606 GN=HLTF PE=1 SV=2                                | -0,202629419 | 3,002585 |
| P52630 | Signal transducer and activator of transcription 2 OS=Homo sapiens OX=9606 GN=STAT2 PE=1 SV=1               | -0,39955864  | 2,992575 |
| P35232 | Prohibitin OS=Homo sapiens OX=9606 GN=PHB PE=1 SV=1                                                         | -0,240936041 | 2,991137 |
| P11362 | Fibroblast growth factor receptor 1 OS=Homo sapiens OX=9606 GN=FGFR1 PE=1 SV=3                              | -0,497175241 | 2,990732 |
| Q15758 | Neutral amino acid transporter B(O) OS=Homo sapiens OX=9606 GN=SLC1A5 PE=1 SV=2                             | 0,398469253  | 2,982892 |
| Q8TAT6 | Nuclear protein localization protein 4 homolog OS=Homo sapiens OX=9606 GN=NPLC4 PE=1 SV=3                   | -0,239967299 | 2,975027 |
| Q9UPY6 | #N/D                                                                                                        | -0,310362092 | 2,974361 |
| Q9Y5L0 | Transportin-3 OS=Homo sapiens OX=9606 GN=TNPO3 PE=1 SV=3                                                    | -0,224652685 | 2,974301 |
| Q9Y6G9 | Cytoplasmic dynein 1 light intermediate chain 1 OS=Homo sapiens OX=9606 GN=DYNC1L1 PE=1 SV=3                | 0,224597953  | 2,973321 |
| Q8WUH2 | Transforming growth factor-beta receptor-associated protein 1 OS=Homo sapiens OX=9606 GN=TGFBRAP1 PE=1 SV=1 | -0,576806293 | 2,970113 |
| Q99755 | Phosphatidylinositol 4-phosphate 5-kinase type-1 alpha OS=Homo sapiens OX=9606 GN=PIP5K1A PE=1 SV=1         | 0,620656753  | 2,965974 |
| O60346 | PH domain leucine-rich repeat-containing protein phosphatase 1 OS=Homo sapiens OX=9606 GN=PHLPP1 PE=1 SV=3  | 2,05760342   | 2,962642 |
| Q9NPJ6 | Mediator of RNA polymerase II transcription subunit 4 OS=Homo sapiens OX=9606 GN=MED4 PE=1 SV=1             | -0,460594774 | 2,960114 |
| P82664 | 28S ribosomal protein S10, mitochondrial OS=Homo sapiens OX=9606 GN=MRPS10 PE=1 SV=2                        | -1,382663149 | 2,957577 |
| Q58FF6 | Putative heat shock protein HSP 90-beta 4 OS=Homo sapiens OX=9606 GN=HSP90AB4 PE=5 SV=1                     | 0,360810928  | 2,957394 |
| Q96EK5 | KIF1-binding protein OS=Homo sapiens OX=9606 GN=KIF1BP PE=1 SV=1                                            | 0,22314337   | 2,947305 |
| Q8WXA3 | RUN and FYVE domain-containing protein 2 OS=Homo sapiens OX=9606 GN=RUFY2 PE=1 SV=3                         | -0,334459602 | 2,944697 |
| P28161 | Glutathione S-transferase Mu 2 OS=Homo sapiens OX=9606 GN=GSTM2 PE=1 SV=2                                   | 0,438874691  | 2,939913 |
| Q9BW83 | Intraflagellar transport protein 27 homolog OS=Homo sapiens OX=9606 GN=IFT27 PE=1 SV=1                      | 0,29074853   | 2,939447 |
| P61106 | Ras-related protein Rab-14 OS=Homo sapiens OX=9606 GN=RAB14 PE=1 SV=4                                       | 0,222591047  | 2,937446 |
| Q8N2K0 | Lysophosphatidylserine lipase ABHD12 OS=Homo sapiens OX=9606 GN=ABHD12 PE=1 SV=2                            | -0,280365165 | 2,937378 |
| O43707 | Alpha-actinin-4 OS=Homo sapiens OX=9606 GN=ACTN4 PE=1 SV=2                                                  | 0,136334288  | 2,931656 |
| P39023 | 60S ribosomal protein L3 OS=Homo sapiens OX=9606 GN=RPL3 PE=1 SV=2                                          | -0,204224164 | 2,931601 |
| P85037 | Forkhead box protein K1 OS=Homo sapiens OX=9606 GN=FOXP1 PE=1 SV=1                                          | 0,852064593  | 2,931563 |
| Q5GLZ8 | Probable E3 ubiquitin-protein ligase HERC4 OS=Homo sapiens OX=9606 GN=HERC4 PE=1 SV=1                       | -0,294432973 | 2,927465 |
| Q5VU43 | Myomegalin OS=Homo sapiens OX=9606 GN=PDE4DIP PE=1 SV=3                                                     | 0,893888277  | 2,926692 |
| Q03135 | Caveolin-1 OS=Homo sapiens OX=9606 GN=CAV1 PE=1 SV=4                                                        | -0,436637302 | 2,92279  |
| Q9Y237 | Peptidyl-prolyl cis-trans isomerase NIMA-interacting 4 OS=Homo sapiens OX=9606 GN=PIN4 PE=1 SV=1            | -0,502007642 | 2,921561 |
| Q99832 | T-complex protein 1 subunit eta OS=Homo sapiens OX=9606 GN=CCT7 PE=1 SV=2                                   | 0,152746838  | 2,920205 |
| O00401 | Neural Wiskott-Aldrich syndrome protein OS=Homo sapiens OX=9606 GN=WASL PE=1 SV=2                           | 0,39133139   | 2,919484 |
| P90669 | Cytochrome c oxidase subunit 6C OS=Homo sapiens OX=9606 GN=COX6C PE=1 SV=2                                  | -0,845412433 | 2,913226 |
| Q9NYB0 | Telomeric repeat-binding factor 2-interacting protein 1 OS=Homo sapiens OX=9606 GN=TERF2IP PE=1 SV=1        | 0,608936301  | 2,911503 |
| Q9Y508 | E3 ubiquitin-protein ligase RNF114 OS=Homo sapiens OX=9606 GN=RNF114 PE=1 SV=1                              | 0,435103056  | 2,911046 |
| O00170 | AH receptor-interacting protein OS=Homo sapiens OX=9606 GN=AIP PE=1 SV=2                                    | -0,278332899 | 2,909689 |
| Q96C01 | Protein FAM136A OS=Homo sapiens OX=9606 GN=FAM136A PE=1 SV=1                                                | -0,434499344 | 2,906425 |
| Q14152 | Eukaryotic translation initiation factor 3 subunit A OS=Homo sapiens OX=9606 GN=EIF3A PE=1 SV=1             | -0,10949151  | 2,905349 |
| Q02543 | 60S ribosomal protein L18a OS=Homo sapiens OX=9606 GN=RPL18A PE=1 SV=2                                      | -0,292656155 | 2,90473  |
| Q9UK39 | Nocturnin OS=Homo sapiens OX=9606 GN=NOCT PE=1 SV=2                                                         | 0,660127615  | 2,902811 |
| P08648 | Integrin alpha-5 OS=Homo sapiens OX=9606 GN=ITGA5 PE=1 SV=2                                                 | 0,235454483  | 2,900319 |
| P36167 | Dynein light chain 1, cytoplasmic OS=Homo sapiens OX=9606 GN=DYNLL1 PE=1 SV=1                               | -0,837750654 | 2,891992 |
| P12110 | Collagen alpha-2(VI) chain OS=Homo sapiens OX=9606 GN=COL6A2 PE=1 SV=4                                      | 0,604439181  | 2,890501 |
| Q9UKD2 | mRNA turnover protein 4 homolog OS=Homo sapiens OX=9606 GN=MRTO4 PE=1 SV=2                                  | -0,354636613 | 2,885056 |
| P82094 | TATA element modulatory factor OS=Homo sapiens OX=9606 GN=TMF1 PE=1 SV=2                                    | 0,354486126  | 2,883556 |
| Q722T5 | TRMT1-like protein OS=Homo sapiens OX=9606 GN=TRMT1L PE=1 SV=2                                              | 0,431460512  | 2,883158 |
| Q6PCB7 | Long-chain fatty acid transport protein 1 OS=Homo sapiens OX=9606 GN=SLC27A1 PE=1 SV=1                      | -0,495627903 | 2,881535 |

|        |                                                                                                        |              |          |
|--------|--------------------------------------------------------------------------------------------------------|--------------|----------|
| P61006 | Ras-related protein Rab-8A OS=Homo sapiens OX=9606 GN=RAB8A PE=1 SV=1                                  | 0,495195408  | 2,878819 |
| P49406 | 39S ribosomal protein L19, mitochondrial OS=Homo sapiens OX=9606 GN=MRPL19 PE=1 SV=2                   | -0,386304333 | 2,874866 |
| Q9NX62 | Inositol monophosphatase 3 OS=Homo sapiens OX=9606 GN=IMPAD1 PE=1 SV=1                                 | -0,43015352  | 2,873149 |
| Q96920 | FAST kinase domain-containing protein 4 OS=Homo sapiens OX=9606 GN=TBRG4 PE=1 SV=1                     | -0,251343342 | 2,861104 |
| Q15435 | Protein phosphatase 1 regulatory subunit 7 OS=Homo sapiens OX=9606 GN=PPP1R7 PE=1 SV=1                 | 0,250909493  | 2,854574 |
| Q8TD16 | Protein bicaudal D homolog 2 OS=Homo sapiens OX=9606 GN=BICD2 PE=1 SV=1                                | -0,273993216 | 2,850772 |
| Q8TEQ6 | Gem-associated protein 5 OS=Homo sapiens OX=9606 GN=GEMIN5 PE=1 SV=3                                   | -0,165217685 | 2,849563 |
| Q13148 | TAR DNA-binding protein 43 OS=Homo sapiens OX=9606 GN=TARDBP PE=1 SV=1                                 | -0,305274368 | 2,84883  |
| P27144 | Adenylate kinase 4, mitochondrial OS=Homo sapiens OX=9606 GN=AK4 PE=1 SV=1                             | 0,6652595    | 2,84395  |
| P49321 | Nuclear autoantigenic sperm protein OS=Homo sapiens OX=9606 GN=NASP PE=1 SV=2                          | -0,199715461 | 2,843654 |
| Q9Y316 | Protein MEMO1 OS=Homo sapiens OX=9606 GN=MEMO1 PE=1 SV=1                                               | 0,287804438  | 2,842846 |
| Q96FS4 | Signal-induced proliferation-associated protein 1 OS=Homo sapiens OX=9606 GN=SIPA1 PE=1 SV=1           | -0,483680968 | 2,84224  |
| Q9UKN8 | General transcription factor 3C polypeptide 4 OS=Homo sapiens OX=9606 GN=GTF3C4 PE=1 SV=2              | -0,260719645 | 2,839005 |
| P50851 | Lipopolysaccharide-responsive and beige-like anchor protein OS=Homo sapiens OX=9606 GN=LRBA PE=1 SV=4  | -1,882818381 | 2,838321 |
| P17066 | #N/D                                                                                                   | 0,816684931  | 2,832972 |
| O14641 | Segment polarity protein dishevelled homolog DVL-2 OS=Homo sapiens OX=9606 GN=DVL2 PE=1 SV=1           | -0,424265138 | 2,828046 |
| Q9Y6K5 | 2'-5'-oligoadenylate synthase 3 OS=Homo sapiens OX=9606 GN=OAS3 PE=1 SV=3                              | -0,380547847 | 2,82382  |
| P49005 | DNA polymerase delta subunit 2 OS=Homo sapiens OX=9606 GN=POLD2 PE=1 SV=1                              | -0,380494783 | 2,82335  |
| Q8WZ82 | Esterase OVCA2 OS=Homo sapiens OX=9606 GN=OVCA2 PE=1 SV=1                                              | -0,323176342 | 2,820921 |
| P33897 | ATP-binding cassette sub-family D member 1 OS=Homo sapiens OX=9606 GN=ABCD1 PE=1 SV=2                  | -0,302909636 | 2,820787 |
| P29084 | Transcription initiation factor IIE subunit beta OS=Homo sapiens OX=9606 GN=GTF2E2 PE=1 SV=1           | -0,348165259 | 2,820624 |
| P46934 | E3 ubiquitin-protein ligase NEDD4 OS=Homo sapiens OX=9606 GN=NEDD4 PE=1 SV=4                           | -0,379419063 | 2,813817 |
| Q99733 | Nucleosome assembly protein 1-like 4 OS=Homo sapiens OX=9606 GN=NAP1L4 PE=1 SV=1                       | 0,271177605  | 2,812703 |
| P07814 | Bifunctional glutamate/proline--tRNA ligase OS=Homo sapiens OX=9606 GN=EPRS PE=1 SV=5                  | 0,105437007  | 2,812553 |
| Q9BWZ7 | Nuclear pore complex protein Nup85 OS=Homo sapiens OX=9606 GN=NUP85 PE=1 SV=1                          | -0,258156577 | 2,802429 |
| P32189 | Glycerol kinase OS=Homo sapiens OX=9606 GN=GK PE=1 SV=3                                                | -0,805696261 | 2,801809 |
| Q07352 | mRNA decay activator protein ZFP36L1 OS=Homo sapiens OX=9606 GN=ZFP36L1 PE=1 SV=1                      | 0,585118095  | 2,799632 |
| Q3KQV9 | UDP-N-acetylhexosamine pyrophosphorylase-like protein 1 OS=Homo sapiens OX=9606 GN=UAP111 PE=1 SV=2    | 0,202707479  | 2,798789 |
| P09001 | 39S ribosomal protein L3, mitochondrial OS=Homo sapiens OX=9606 GN=MRPL3 PE=1 SV=1                     | -0,482373349 | 2,798107 |
| P27816 | Microtubule-associated protein 4 OS=Homo sapiens OX=9606 GN=MAP4 PE=1 SV=3                             | -0,131822024 | 2,795619 |
| P12814 | Alpha-actinin-1 OS=Homo sapiens OX=9606 GN=ACTN1 PE=1 SV=2                                             | 0,113615398  | 2,794165 |
| Q9BYN0 | Sulfiredoxin-1 OS=Homo sapiens OX=9606 GN=SRXN1 PE=1 SV=2                                              | 0,584097543  | 2,794804 |
| Q9UPX0 | Protein turtle homolog B OS=Homo sapiens OX=9606 GN=IGSF9B PE=2 SV=2                                   | -0,483549404 | 2,791603 |
| P52306 | Rap1 GTPase-GDP dissociation stimulator 1 OS=Homo sapiens OX=9606 GN=RAP1GDS1 PE=1 SV=3                | -0,207900955 | 2,788419 |
| P02795 | Metallothionein-2 OS=Homo sapiens OX=9606 GN=MT2A PE=1 SV=1                                            | -0,800796581 | 2,787831 |
| Q4G0F5 | Vacuolar protein sorting-associated protein 26B OS=Homo sapiens OX=9606 GN=VPS26B PE=1 SV=2            | -0,344466757 | 2,783878 |
| Q9GZ21 | N-alpha-acetyltransferase 50 OS=Homo sapiens OX=9606 GN=NAA50 PE=1 SV=1                                | 0,319384321  | 2,779515 |
| P19388 | DNA-directed RNA polymerases I, II, and III subunit RPABC1 OS=Homo sapiens OX=9606 GN=POLR2E PE=1 SV=4 | -0,34398485  | 2,779094 |
| P12270 | Nucleoprotein TPR OS=Homo sapiens OX=9606 GN=TPR PE=1 SV=3                                             | -0,111235101 | 2,77836  |
| Q86VN1 | Vacuolar protein-sorting-associated protein 36 OS=Homo sapiens OX=9606 GN=VPS36 PE=1 SV=1              | -0,479086542 | 2,777364 |
| Q63HN8 | E3 ubiquitin-protein ligase RNF213 OS=Homo sapiens OX=9606 GN=RNF213 PE=1 SV=3                         | -0,131043188 | 2,773044 |
| Q9BSH4 | Translational activator of cytochrome c oxidase 1 OS=Homo sapiens OX=9606 GN=TACO1 PE=1 SV=1           | -0,416755165 | 2,770501 |
| Q9UBF8 | Phosphatidylinositol 4-kinase beta OS=Homo sapiens OX=9606 GN=PI4KB PE=1 SV=1                          | -0,476579211 | 2,761527 |
| P07355 | Annexin A2 OS=Homo sapiens OX=9606 GN=ANXA2 PE=1 SV=2                                                  | 0,155960083  | 2,757842 |
| Q9H2W6 | 39S ribosomal protein L46, mitochondrial OS=Homo sapiens OX=9606 GN=MRPL46 PE=1 SV=1                   | -0,789240672 | 2,754655 |
| P14923 | Junction plakoglobin OS=Homo sapiens OX=9606 GN=JUP PE=1 SV=3                                          | -0,153279489 | 2,75344  |
| P11172 | Uridine 5'-monophosphate synthase OS=Homo sapiens OX=9606 GN=UMPS PE=1 SV=1                            | -0,226309657 | 2,75068  |
| Q15063 | Periostin OS=Homo sapiens OX=9606 GN=POSTN PE=1 SV=2                                                   | 1,766258401  | 2,749247 |
| Q9NYB9 | Abl interactor 2 OS=Homo sapiens OX=9606 GN=ABI2 PE=1 SV=1                                             | -0,474259015 | 2,746862 |
| P21589 | 5'-nucleotidase OS=Homo sapiens OX=9606 GN=NT5E PE=1 SV=1                                              | 0,189840015  | 2,746476 |
| O14974 | Protein phosphatase 1 regulatory subunit 12A OS=Homo sapiens OX=9606 GN=PPP1R12A PE=1 SV=1             | 0,170104297  | 2,746201 |
| Q9UHD9 | Ubiquilin-2 OS=Homo sapiens OX=9606 GN=UBQLN2 PE=1 SV=2                                                | -0,371715364 | 2,745611 |
| P30443 | HLA class I histocompatibility antigen, A-1 alpha chain OS=Homo sapiens OX=9606 GN=HLA-A PE=1 SV=1     | -0,315881622 | 2,741359 |
| Q96A26 | Protein FAM162A OS=Homo sapiens OX=9606 GN=FAM162A PE=1 SV=2                                           | -1,704035168 | 2,738725 |
| Q9H2D6 | TRIO and F-actin-binding protein OS=Homo sapiens OX=9606 GN=TRIOBP PE=1 SV=3                           | 0,357754275  | 2,737477 |
| Q13459 | Unconventional myosin-IXb OS=Homo sapiens OX=9606 GN=MYO9B PE=1 SV=3                                   | -0,189181294 | 2,733499 |
| P11766 | Alcohol dehydrogenase class-3 OS=Homo sapiens OX=9606 GN=ADH5 PE=1 SV=4                                | 0,253143318  | 2,731248 |
| Q9P273 | Teneurin-3 OS=Homo sapiens OX=9606 GN=TENM3 PE=2 SV=3                                                  | 0,180370393  | 2,730152 |
| Q14974 | Importin subunit beta-1 OS=Homo sapiens OX=9606 GN=KPNB1 PE=1 SV=2                                     | -0,137745976 | 2,729603 |
| Q96R56 | NudC domain-containing protein 1 OS=Homo sapiens OX=9606 GN=NUDCC1 PE=1 SV=2                           | 0,278713587  | 2,727694 |
| Q9BTW9 | Tubulin-specific chaperone D OS=Homo sapiens OX=9606 GN=TBCD PE=1 SV=2                                 | -0,162924967 | 2,726521 |
| P23743 | Diacylglycerol kinase alpha OS=Homo sapiens OX=9606 GN=DGKA PE=1 SV=3                                  | -0,242282893 | 2,725601 |
| Q9BQ70 | Transcription factor 25 OS=Homo sapiens OX=9606 GN=TCF25 PE=1 SV=1                                     | -0,278522642 | 2,725287 |
| Q8IWB9 | Testis-expressed protein 2 OS=Homo sapiens OX=9606 GN=TEX2 PE=1 SV=2                                   | -0,470681603 | 2,724231 |
| Q9NUP9 | Protein lin-7 homolog C OS=Homo sapiens OX=9606 GN=LIN7C PE=1 SV=1                                     | -0,568036782 | 2,71845  |
| P04632 | Calpain small subunit 1 OS=Homo sapiens OX=9606 GN=CAPN1 PE=1 SV=1                                     | -0,241542713 | 2,714613 |
| Q8N3P4 | Vacuolar protein sorting-associated protein 8 homolog OS=Homo sapiens OX=9606 GN=VPS8 PE=1 SV=3        | -0,506414593 | 2,713385 |
| P25705 | ATP synthase subunit alpha, mitochondrial OS=Homo sapiens OX=9606 GN=ATP5F1A PE=1 SV=1                 | -0,162302195 | 2,712161 |
| Q9NXR7 | BRIS1 and BRCA1-A complex member 2 OS=Homo sapiens OX=9606 GN=BABAM2 PE=1 SV=2                         | 0,468490507  | 2,710358 |
| Q9H0J9 | Protein mono-ADP-ribosyltransferase PARP12 OS=Homo sapiens OX=9606 GN=PARP12 PE=1 SV=1                 | 0,170023844  | 2,709318 |
| P62487 | DNA-directed RNA polymerase II subunit RPB7 OS=Homo sapiens OX=9606 GN=POLR2G PE=1 SV=1                | 0,773584678  | 2,709242 |
| P11498 | Pyruvate carboxylase, mitochondrial OS=Homo sapiens OX=9606 GN=PC PE=1 SV=2                            | 0,367497763  | 2,70832  |
| Q8IWR0 | Zinc finger CCCH domain-containing protein 7A OS=Homo sapiens OX=9606 GN=ZC3H7A PE=1 SV=1              | -0,565511246 | 2,706381 |
| Q99439 | Calponin-2 OS=Homo sapiens OX=9606 GN=CNN2 PE=1 SV=4                                                   | 0,263124615  | 2,704517 |
| Q9B2X2 | Uridine-cytidine kinase 2 OS=Homo sapiens OX=9606 GN=UCK2 PE=1 SV=1                                    | -0,770468884 | 2,700139 |
| Q6WCQ1 | Myosin phosphatase Rho-interacting protein OS=Homo sapiens OX=9606 GN=MPRIIP PE=1 SV=3                 | -0,156170557 | 2,699813 |
| Q9P265 | Disco-interacting protein 2 homolog B OS=Homo sapiens OX=9606 GN=DIP2B PE=1 SV=3                       | 0,240404621  | 2,697741 |
| Q12788 | Transducin beta-like protein 3 OS=Homo sapiens OX=9606 GN=TL3 PE=1 SV=2                                | 0,275969638  | 2,69315  |
| P39019 | 40S ribosomal protein S19 OS=Homo sapiens OX=9606 GN=RPS19 PE=1 SV=2                                   | -0,262160193 | 2,691631 |
| Q9UH16 | Probable ATP-dependent RNA helicase DDX20 OS=Homo sapiens OX=9606 GN=DDX20 PE=1 SV=2                   | 0,335013124  | 2,690229 |
| Q13573 | SNW domain-containing protein 1 OS=Homo sapiens OX=9606 GN=SNW1 PE=1 SV=1                              | -0,334697254 | 2,687107 |
| Q8IZL8 | Proline-, glutamic acid- and leucine-rich protein 1 OS=Homo sapiens OX=9606 GN=PELP1 PE=1 SV=2         | -0,249876493 | 2,685126 |
| Q9BX55 | AP-1 complex subunit mu-1 OS=Homo sapiens OX=9606 GN=AP1M1 PE=1 SV=3                                   | 0,222052623  | 2,681842 |
| Q92541 | RNA polymerase-associated protein RTF1 homolog OS=Homo sapiens OX=9606 GN=RTF1 PE=1 SV=4               | -0,291056036 | 2,68105  |
| Q9H0G5 | Nuclear speckle splicing regulatory protein 1 OS=Homo sapiens OX=9606 GN=NSRSP1 PE=1 SV=1              | -0,763860594 | 2,680762 |
| Q13505 | Metaxin-1 OS=Homo sapiens OX=9606 GN=MTX1 PE=1 SV=3                                                    | -0,46377089  | 2,680449 |
| Q04828 | Aldo-keto reductase family 1 member C1 OS=Homo sapiens OX=9606 GN=AKR1C1 PE=1 SV=1                     | 0,404772565  | 2,678663 |
| P11441 | Ubiquitin-like protein 4A OS=Homo sapiens OX=9606 GN=UBL4A PE=1 SV=1                                   | -0,404527376 | 2,676784 |
| Q9BW72 | HIG1 domain family member 2A, mitochondrial OS=Homo sapiens OX=9606 GN=HIGD2A PE=1 SV=1                | -0,761302732 | 2,673235 |
| P42226 | Signal transducer and activator of transcription 6 OS=Homo sapiens OX=9606 GN=STAT6 PE=1 SV=1          | -0,311689391 | 2,672545 |
| Q32M24 | Leucine-rich repeat flightless-interacting protein 1 OS=Homo sapiens OX=9606 GN=LRRFIP1 PE=1 SV=2      | 0,177555536  | 2,67208  |

|        |                                                                                                            |              |          |
|--------|------------------------------------------------------------------------------------------------------------|--------------|----------|
| Q8N201 | Integrator complex subunit 1 OS=Homo sapiens OX=9606 GN=INTS1 PE=1 SV=2                                    | -0,332965204 | 2,669997 |
| Q460N5 | Protein mono-ADP-ribosyltransferase PARP14 OS=Homo sapiens OX=9606 GN=PARP14 PE=1 SV=3                     | -0,461760024 | 2,667694 |
| Q9UBX3 | Mitochondrial dicarboxylate carrier OS=Homo sapiens OX=9606 GN=SLC25A10 PE=1 SV=2                          | -0,362876881 | 2,667508 |
| O14656 | Torsin-1A OS=Homo sapiens OX=9606 GN=TOR1A PE=1 SV=1                                                       | -0,403048387 | 2,665448 |
| Q96EX3 | WD repeat-containing protein 34 OS=Homo sapiens OX=9606 GN=WDR34 PE=1 SV=2                                 | -1,661084162 | 2,664057 |
| P19474 | E3 ubiquitin-protein ligase TRIM21 OS=Homo sapiens OX=9606 GN=TRIM21 PE=1 SV=1                             | 0,461081956  | 2,663392 |
| Q75368 | SH3 domain-binding glutamic acid-rich-like protein OS=Homo sapiens OX=9606 GN=SH3BGR1 PE=1 SV=1            | -0,461027908 | 2,663049 |
| Q5K651 | Sterile alpha motif domain-containing protein 9 OS=Homo sapiens OX=9606 GN=SAMD9 PE=1 SV=1                 | 0,190259598  | 2,662182 |
| Q9Y2X3 | Nucleolar protein 58 OS=Homo sapiens OX=9606 GN=NOP58 PE=1 SV=1                                            | -0,213509798 | 2,661732 |
| Q6PL24 | Protein TMED8 OS=Homo sapiens OX=9606 GN=TMED8 PE=1 SV=1                                                   | -0,30831721  | 2,651634 |
| P54132 | #N/D                                                                                                       | 0,217379931  | 2,650123 |
| Q9Y394 | Dehydrogenase/reductase SDR family member 7 OS=Homo sapiens OX=9606 GN=DHRS7 PE=1 SV=1                     | 0,458379312  | 2,646236 |
| Q92522 | Histone H1x OS=Homo sapiens OX=9606 GN=H1FX PE=1 SV=1                                                      | -0,329838064 | 2,639145 |
| Q16540 | 39S ribosomal protein L23, mitochondrial OS=Homo sapiens OX=9606 GN=MRPL23 PE=1 SV=1                       | -0,550608294 | 2,634821 |
| P49917 | DNA ligase 4 OS=Homo sapiens OX=9606 GN=LIG4 PE=1 SV=2                                                     | -0,747756124 | 2,633129 |
| Q86VP4 | Transcriptional repressor p66-alpha OS=Homo sapiens OX=9606 GN=GATAD2A PE=1 SV=1                           | -0,286917454 | 2,632606 |
| P61313 | 60S ribosomal protein L15 OS=Homo sapiens OX=9606 GN=RPL15 PE=1 SV=2                                       | -0,286908208 | 2,632498 |
| Q68CQ7 | Glycosyltransferase 8 domain-containing protein 1 OS=Homo sapiens OX=9606 GN=GLT8D1 PE=1 SV=2              | -0,52391875  | 2,627244 |
| P15924 | Desmoplakin OS=Homo sapiens OX=9606 GN=DSP PE=1 SV=3                                                       | -0,153030443 | 2,625225 |
| Q09028 | Histone-binding protein RBBP4 OS=Homo sapiens OX=9606 GN=RBBP4 PE=1 SV=3                                   | 0,304997528  | 2,623379 |
| Q14693 | Phosphatidate phosphatase LPIN1 OS=Homo sapiens OX=9606 GN=LPIN1 PE=1 SV=2                                 | -0,744399499 | 2,623128 |
| Q8WXH0 | Nesprin-2 OS=Homo sapiens OX=9606 GN=SYNE2 PE=1 SV=3                                                       | -0,743927499 | 2,621719 |
| Q9UNF1 | Melanoma-associated antigen D2 OS=Homo sapiens OX=9606 GN=MAGED2 PE=1 SV=2                                 | 0,158247382  | 2,619357 |
| P29317 | Ephrin type-A receptor 2 OS=Homo sapiens OX=9606 GN=EPHA2 PE=1 SV=2                                        | 0,187959114  | 2,618652 |
| Q9NP81 | Serine--tRNA ligase, mitochondrial OS=Homo sapiens OX=9606 GN=SARS2 PE=1 SV=1                              | -0,304559614 | 2,618651 |
| P16930 | Fumarylacetoacetase OS=Homo sapiens OX=9606 GN=FAH PE=1 SV=2                                               | -0,357323807 | 2,618532 |
| Q14789 | Golgin subfamily B member 1 OS=Homo sapiens OX=9606 GN=GOLGB1 PE=1 SV=2                                    | 0,120250035  | 2,615283 |
| Q96T76 | MMS19 nucleotide excision repair protein homolog OS=Homo sapiens OX=9606 GN=MMS19 PE=1 SV=2                | 0,174764787  | 2,614946 |
| Q9H6R4 | Nucleolar protein 6 OS=Homo sapiens OX=9606 GN=NOL6 PE=1 SV=2                                              | -0,256360506 | 2,614471 |
| Q9Y6M7 | Sodium bicarbonate cotransporter 3 OS=Homo sapiens OX=9606 GN=SLC4A7 PE=1 SV=2                             | 0,545694247  | 2,611098 |
| Q9HOE2 | Toll-interacting protein OS=Homo sapiens OX=9606 GN=TOLLIP PE=1 SV=1                                       | 0,326847697  | 2,609688 |
| Q8IX90 | Spindle and kinetochore-associated protein 3 OS=Homo sapiens OX=9606 GN=SKA3 PE=1 SV=2                     | -0,452295637 | 2,607575 |
| Q86UQ4 | ATP-binding cassette sub-family A member 13 OS=Homo sapiens OX=9606 GN=ABCA13 PE=2 SV=3                    | -0,490919566 | 2,606218 |
| Q8TD22 | [F-actin]-monooxygenase MICAL1 OS=Homo sapiens OX=9606 GN=MICAL1 PE=1 SV=2                                 | -0,217246229 | 2,604763 |
| Q6P2E9 | Enhancer of mRNA-decapping protein 4 OS=Homo sapiens OX=9606 GN=EDC4 PE=1 SV=1                             | 0,20964343   | 2,597444 |
| P18858 | DNA ligase 1 OS=Homo sapiens OX=9606 GN=LIG1 PE=1 SV=1                                                     | -0,558575494 | 2,597356 |
| Q9GZL7 | Ribosome biogenesis protein WDR12 OS=Homo sapiens OX=9606 GN=WDR12 PE=1 SV=2                               | -0,302510771 | 2,596554 |
| O15050 | TPR and ankyrin repeat-containing protein 1 OS=Homo sapiens OX=9606 GN=TRANK1 PE=2 SV=4                    | -0,924068442 | 2,592256 |
| P57678 | Gem-associated protein 4 OS=Homo sapiens OX=9606 GN=GEMIN4 PE=1 SV=2                                       | -0,325057366 | 2,592075 |
| Q53TN4 | Cytochrome b reductase 1 OS=Homo sapiens OX=9606 GN=CYBRD1 PE=1 SV=1                                       | 0,73374611   | 2,591215 |
| P42166 | Lamina-associated polypeptide 2, isoform alpha OS=Homo sapiens OX=9606 GN=TMPO PE=1 SV=2                   | -0,216380092 | 2,590946 |
| Q96HC4 | PDZ and LIM domain protein 5 OS=Homo sapiens OX=9606 GN=PDLIM5 PE=1 SV=5                                   | 0,30192493   | 2,590241 |
| P14625 | Endoplasmic reticulum protein OS=Homo sapiens OX=9606 GN=HSP90B1 PE=1 SV=1                                 | 0,124758175  | 2,58926  |
| Q9BSJ2 | Gamma-tubulin complex component 2 OS=Homo sapiens OX=9606 GN=TUBGCP2 PE=1 SV=2                             | -0,301590757 | 2,586642 |
| Q92968 | Peroxisomal membrane protein PEX13 OS=Homo sapiens OX=9606 GN=PEX13 PE=1 SV=2                              | -0,773826349 | 2,584328 |
| P43246 | DNA mismatch repair protein Msh2 OS=Homo sapiens OX=9606 GN=MSH2 PE=1 SV=1                                 | -0,146337155 | 2,582546 |
| P43304 | Glycerol-3-phosphate dehydrogenase, mitochondrial OS=Homo sapiens OX=9606 GN=GPD2 PE=1 SV=3                | -0,162620642 | 2,581791 |
| Q96MG7 | Non-structural maintenance of chromosomes element 3 homolog OS=Homo sapiens OX=9606 GN=NSMCE3 PE=1 SV=1    | -0,759995654 | 2,579362 |
| P46937 | Transcriptional coactivator YAP1 OS=Homo sapiens OX=9606 GN=YAP1 PE=1 SV=2                                 | 0,300523609  | 2,575154 |
| Q9Y697 | Cysteine desulfurase, mitochondrial OS=Homo sapiens OX=9606 GN=NFS1 PE=1 SV=3                              | 0,727298515  | 2,571775 |
| P09874 | Poly [ADP-ribose] polymerase 1 OS=Homo sapiens OX=9606 GN=PARP1 PE=1 SV=4                                  | -0,116360918 | 2,571014 |
| P49643 | DNA primase large subunit OS=Homo sapiens OX=9606 GN=PRIM2 PE=1 SV=2                                       | -0,300127879 | 2,570896 |
| Q96EP5 | DAZ-associated protein 1 OS=Homo sapiens OX=9606 GN=DAZAP1 PE=1 SV=1                                       | -0,300038282 | 2,569932 |
| Q96008 | Mitochondrial import receptor subunit TOM40 homolog OS=Homo sapiens OX=9606 GN=TOMM40 PE=1 SV=1            | -0,351425675 | 2,566602 |
| Q9NZM5 | Ribosome biogenesis protein NOPS3 OS=Homo sapiens OX=9606 GN=NOPS3 PE=1 SV=2                               | -0,536504286 | 2,566569 |
| P98179 | RNA-binding protein 3 OS=Homo sapiens OX=9606 GN=RBM3 PE=1 SV=1                                            | -0,389509122 | 2,561707 |
| Q8NBJ5 | Procollagen galactosyltransferase 1 OS=Homo sapiens OX=9606 GN=COLGALT1 PE=1 SV=1                          | 0,161411697  | 2,555581 |
| P62829 | 60S ribosomal protein L23 OS=Homo sapiens OX=9606 GN=RPL23 PE=1 SV=1                                       | -0,298531969 | 2,553738 |
| P11940 | Polyadenylate-binding protein 1 OS=Homo sapiens OX=9606 GN=PABPC1 PE=1 SV=2                                | -0,194675484 | 2,551891 |
| Q60825 | 6-phosphofructo-2-kinase/fructose-2,6-bisphosphatase 2 OS=Homo sapiens OX=9606 GN=PFKFB2 PE=1 SV=2         | 0,839131029  | 2,551874 |
| Q8NFV4 | Protein ABHD11 OS=Homo sapiens OX=9606 GN=ABHD11 PE=1 SV=1                                                 | -0,443397839 | 2,550934 |
| Q92845 | Kinesin-associated protein 3 OS=Homo sapiens OX=9606 GN=KIFAP3 PE=1 SV=2                                   | 0,387748782  | 2,548225 |
| P47755 | F-actin-capping protein subunit alpha-2 OS=Homo sapiens OX=9606 GN=CAPZA2 PE=1 SV=3                        | 0,264162097  | 2,545682 |
| Q96JM3 | Chromosome alignment-maintaining phosphoprotein 1 OS=Homo sapiens OX=9606 GN=CHAMP1 PE=1 SV=2              | -0,297608564 | 2,543821 |
| P15151 | Poliiovirus receptor OS=Homo sapiens OX=9606 GN=PVR PE=1 SV=2                                              | 0,717550322  | 2,542202 |
| O14618 | Copper chaperone for superoxide dismutase OS=Homo sapiens OX=9606 GN=CCS PE=1 SV=1                         | 0,44201512   | 2,542122 |
| P29401 | Transketolase OS=Homo sapiens OX=9606 GN=TKT PE=1 SV=3                                                     | 0,136245371  | 2,541126 |
| Q8IVG5 | Sterile alpha motif domain-containing protein 9-like OS=Homo sapiens OX=9606 GN=SAMD9L PE=1 SV=2           | -0,348447307 | 2,540416 |
| Q75962 | Triple functional domain protein OS=Homo sapiens OX=9606 GN=TRIO PE=1 SV=2                                 | -0,129129406 | 2,540259 |
| Q562R1 | Beta-actin-like protein 2 OS=Homo sapiens OX=9606 GN=ACTBL2 PE=1 SV=2                                      | 0,53064784   | 2,538082 |
| Q13444 | Disintegrin and metalloproteinase domain-containing protein 15 OS=Homo sapiens OX=9606 GN=ADAM15 PE=1 SV=4 | -0,71492628  | 2,534204 |
| P10599 | Thioredoxin OS=Homo sapiens OX=9606 GN=TXN PE=1 SV=3                                                       | -0,440498998 | 2,532457 |
| P52434 | DNA-directed RNA polymerases I, II, and III subunit RPABC3 OS=Homo sapiens OX=9606 GN=POLR2H PE=1 SV=4     | 0,385544552  | 2,531345 |
| Q02809 | Procollagen-lysine,2-oxoglutarate 5-dioxygenase 1 OS=Homo sapiens OX=9606 GN=PLOD1 PE=1 SV=2               | 0,174478952  | 2,529625 |
| Q9P0P0 | E3 ubiquitin-protein ligase RNF181 OS=Homo sapiens OX=9606 GN=RNF181 PE=1 SV=1                             | -0,439806981 | 2,528045 |
| Q92783 | Signal transducing adapter molecule 1 OS=Homo sapiens OX=9606 GN=STAM PE=1 SV=3                            | 0,262715135  | 2,527747 |
| Q8IWX8 | SURP and G-patch domain-containing protein 1 OS=Homo sapiens OX=9606 GN=SUGP1 PE=1 SV=2                    | -0,384288234 | 2,521726 |
| P09601 | Heme oxygenase 1 OS=Homo sapiens OX=9606 GN=HMOX1 PE=1 SV=1                                                | 0,527215794  | 2,521348 |
| P49427 | Ubiquitin-conjugating enzyme E2 R1 OS=Homo sapiens OX=9606 GN=CDC34 PE=1 SV=2                              | -0,438652424 | 2,520682 |
| Q9NXG6 | Transmembrane prolyl 4-hydroxylase OS=Homo sapiens OX=9606 GN=P4H1 PE=1 SV=2                               | 0,82769391   | 2,519121 |
| Q75348 | V-type proton ATPase subunit G 1 OS=Homo sapiens OX=9606 GN=ATP6V1G1 PE=1 SV=3                             | -0,526378601 | 2,517261 |
| Q13637 | Ras-related protein Rab-32 OS=Homo sapiens OX=9606 GN=RAB32 PE=1 SV=3                                      | 0,294765113  | 2,513326 |
| Q9UNW1 | Multiple inositol polyphosphate phosphatase 1 OS=Homo sapiens OX=9606 GN=MINPP1 PE=1 SV=1                  | 0,525396944  | 2,512468 |
| O00165 | HCLS1-associated protein X-1 OS=Homo sapiens OX=9606 GN=HAX1 PE=1 SV=2                                     | -0,382804018 | 2,510363 |
| P62280 | 40S ribosomal protein S11 OS=Homo sapiens OX=9606 GN=RPS11 PE=1 SV=3                                       | -0,218977028 | 2,509937 |
| Q43121 | Cell surface glycoprotein MUC18 OS=Homo sapiens OX=9606 GN=MCAM PE=1 SV=2                                  | 0,107987252  | 2,509413 |
| Q9UJU6 | Drebrin-like protein OS=Homo sapiens OX=9606 GN=DBNL PE=1 SV=1                                             | -0,186471594 | 2,500111 |
| O00470 | Homeobox protein Meis1 OS=Homo sapiens OX=9606 GN=MEIS1 PE=1 SV=1                                          | -0,605949704 | 2,499608 |
| P17707 | S-adenosylmethionine decarboxylase proenzyme OS=Homo sapiens OX=9606 GN=AMD1 PE=1 SV=2                     | 1,473472737  | 2,499    |
| Q9UDY2 | Tight junction protein ZO-2 OS=Homo sapiens OX=9606 GN=TJP2 PE=1 SV=2                                      | 0,147576939  | 2,497567 |
| Q9UHQ4 | B-cell receptor-associated protein 29 OS=Homo sapiens OX=9606 GN=BCAP29 PE=1 SV=2                          | -0,381130578 | 2,497554 |

|         |                                                                                                                       |              |          |
|---------|-----------------------------------------------------------------------------------------------------------------------|--------------|----------|
| Q12765  | Secernin-1 OS=Homo sapiens OX=9606 GN=SCRN1 PE=1 SV=2                                                                 | 0,210188062  | 2,492833 |
| Q9NY61  | Protein AATF OS=Homo sapiens OX=9606 GN=AATF PE=1 SV=1                                                                | -0,69970724  | 2,487503 |
| Q43847  | Nardilysin OS=Homo sapiens OX=9606 GN=NRDC PE=1 SV=3                                                                  | -0,185700003 | 2,4862   |
| Q92544  | Transmembrane 9 superfamily member 4 OS=Homo sapiens OX=9606 GN=TM9SF4 PE=1 SV=2                                      | 0,274302591  | 2,486115 |
| P54725  | UV excision repair protein RAD23 homolog A OS=Homo sapiens OX=9606 GN=RAD23A PE=1 SV=1                                | -0,259341421 | 2,486048 |
| Q9UDY4  | Dnaj homology subfamily B member 4 OS=Homo sapiens OX=9606 GN=DNAJB4 PE=1 SV=1                                        | 0,433189775  | 2,485823 |
| A4UGR9  | Xin actin-binding repeat-containing protein 2 OS=Homo sapiens OX=9606 GN=XIRP2 PE=1 SV=2                              | -0,581346016 | 2,485025 |
| Q02818  | Nucleobindin-1 OS=Homo sapiens OX=9606 GN=NUCB1 PE=1 SV=4                                                             | -0,340890856 | 2,474102 |
| Q9BX40  | Protein LSM14 homolog B OS=Homo sapiens OX=9606 GN=LSM14B PE=1 SV=1                                                   | 0,517522074  | 2,473928 |
| Q14662  | CD9 antigen OS=Homo sapiens OX=9606 GN=STX16 PE=1 SV=3                                                                | -0,517465643 | 2,473652 |
| Q16527  | Cysteine and glycine-rich protein 2 OS=Homo sapiens OX=9606 GN=CSR2 PE=1 SV=3                                         | 0,517327486  | 2,472974 |
| Q9GZU8  | PSME3-interacting protein OS=Homo sapiens OX=9606 GN=FAM192A PE=1 SV=1                                                | -0,430436965 | 2,468243 |
| P21926  | CD9 antigen OS=Homo sapiens OX=9606 GN=CD9 PE=1 SV=4                                                                  | 0,430163239  | 2,466495 |
| Q9H479  | Fructosamine-3-kinase OS=Homo sapiens OX=9606 GN=FN3K PE=1 SV=1                                                       | 0,51558726   | 2,464437 |
| Q13405  | 39S ribosomal protein L49, mitochondrial OS=Homo sapiens OX=9606 GN=MRPL49 PE=1 SV=1                                  | -0,515192939 | 2,462501 |
| Q8N857  | Protein enabled homolog OS=Homo sapiens OX=9606 GN=ENAH PE=1 SV=2                                                     | 0,179400703  | 2,458881 |
| P48729  | Casein kinase I isoform alpha OS=Homo sapiens OX=9606 GN=CSNK1A1 PE=1 SV=2                                            | -0,28962849  | 2,458418 |
| P67809  | Nuclease-sensitive element-binding protein 1 OS=Homo sapiens OX=9606 GN=YBX1 PE=1 SV=3                                | -0,271694899 | 2,456062 |
| Q99613  | Eukaryotic translation initiation factor 3 subunit C OS=Homo sapiens OX=9606 GN=EIF3C PE=1 SV=1                       | -0,153776499 | 2,455599 |
| Q14123  | Calcium/calmodulin-dependent 3',5'-cyclic nucleotide phosphodiesterase 1C OS=Homo sapiens OX=9606 GN=PDE1C PE=1 SV=1  | 0,145735878  | 2,455013 |
| P14209  | CD99 antigen OS=Homo sapiens OX=9606 GN=CD99 PE=1 SV=1                                                                | -0,513239405 | 2,452907 |
| Q05682  | Caldesmon OS=Homo sapiens OX=9606 GN=CALD1 PE=1 SV=3                                                                  | 0,174478282  | 2,449449 |
| Q9Y2W1  | Thyroid hormone receptor-associated protein 3 OS=Homo sapiens OX=9606 GN=THRAP3 PE=1 SV=2                             | -0,188526057 | 2,444295 |
| Q9BY32  | Inosine triphosphate pyrophosphatase OS=Homo sapiens OX=9606 GN=ITPA PE=1 SV=2                                        | -0,309931478 | 2,443987 |
| P13726  | Tissue factor OS=Homo sapiens OX=9606 GN=F3 PE=1 SV=1                                                                 | 0,511105766  | 2,442418 |
| Q6NUQ4  | Transmembrane protein 214 OS=Homo sapiens OX=9606 GN=TMEM214 PE=1 SV=2                                                | 0,214466469  | 2,44184  |
| Q8WVM7  | Cohesin subunit SA-1 OS=Homo sapiens OX=9606 GN=STAG1 PE=1 SV=3                                                       | -0,222351229 | 2,434177 |
| Q5EBL4  | RILP-like protein 1 OS=Homo sapiens OX=9606 GN=RILP1 PE=1 SV=1                                                        | -0,799208641 | 2,431999 |
| P06733  | Alpha-enolase OS=Homo sapiens OX=9606 GN=ENO1 PE=1 SV=2                                                               | -0,169452289 | 2,43146  |
| Q9UNF0  | Protein kinase C and casein kinase substrate in neurons protein 2 OS=Homo sapiens OX=9606 GN=PACSN2 PE=1 SV=2         | 0,268757737  | 2,42231  |
| P49748  | Very long-chain specific acyl-CoA dehydrogenase, mitochondrial OS=Homo sapiens OX=9606 GN=ACADVL PE=1 SV=1            | 0,139644165  | 2,421769 |
| Q9UJX6  | Anaphase-promoting complex subunit 2 OS=Homo sapiens OX=9606 GN=ANAPC2 PE=1 SV=1                                      | 1,12769009   | 2,420202 |
| P53007  | Tricarboxylate transport protein, mitochondrial OS=Homo sapiens OX=9606 GN=SLC25A1 PE=1 SV=2                          | -0,307367979 | 2,419025 |
| Q9NR30  | Nucleolar RNA helicase 2 OS=Homo sapiens OX=9606 GN=DDX21 PE=1 SV=5                                                   | -0,149074195 | 2,413879 |
| O00743  | Serine/threonine-protein phosphatase 6 catalytic subunit OS=Homo sapiens OX=9606 GN=PPP6C PE=1 SV=1                   | -0,240690109 | 2,408919 |
| Q9UDR5  | Alpha-aminoacidic semialdehyde synthase, mitochondrial OS=Homo sapiens OX=9606 GN=AASS PE=1 SV=1                      | 0,333135899  | 2,406245 |
| Q96RN5  | Mediator of RNA polymerase II transcription subunit 15 OS=Homo sapiens OX=9606 GN=MED15 PE=1 SV=2                     | 0,673408106  | 2,405526 |
| O75886  | Signal transducing adapter molecule 2 OS=Homo sapiens OX=9606 GN=STAM2 PE=1 SV=1                                      | 0,332867779  | 2,403902 |
| Q14739  | Delta(14)-sterol reductase OS=Homo sapiens OX=9606 GN=LBR PE=1 SV=2                                                   | -0,305716534 | 2,402966 |
| P28066  | Proteasome subunit alpha type-5 OS=Homo sapiens OX=9606 GN=PSMA5 PE=1 SV=3                                            | -0,252571541 | 2,402887 |
| Q9UPV0  | Centrosomal protein of 164 kDa OS=Homo sapiens OX=9606 GN=CEP164 PE=1 SV=3                                            | 0,889528261  | 2,399847 |
| Q9UMY4  | Sorting nexin-12 OS=Homo sapiens OX=9606 GN=SNX12 PE=1 SV=3                                                           | -0,332349974 | 2,39938  |
| Q8WNN8  | Arf-GAP with Rho-GAP domain, ANK repeat and PH domain-containing protein 3 OS=Homo sapiens OX=9606 GN=ARAP3 PE=1 SV=1 | -0,75161237  | 2,396819 |
| Q6NUK1  | Calcium-binding mitochondrial carrier protein 5CaMC-1 OS=Homo sapiens OX=9606 GN=SLC25A24 PE=1 SV=2                   | -0,180640088 | 2,395635 |
| Q96T37  | RNA-binding protein 15 OS=Homo sapiens OX=9606 GN=RBM15 PE=1 SV=2                                                     | 0,331736303  | 2,394021 |
| Q9H3Q1  | Cdc42 effector protein 4 OS=Homo sapiens OX=9606 GN=CDC42EP4 PE=1 SV=1                                                | -1,168061018 | 2,393582 |
| Q9NNW08 | DNA-directed RNA polymerase III subunit RPC2 OS=Homo sapiens OX=9606 GN=POLR3B PE=1 SV=2                              | 0,723890027  | 2,393527 |
| P24752  | Acetyl-CoA acetyltransferase, mitochondrial OS=Homo sapiens OX=9606 GN=ACAT1 PE=1 SV=1                                | -0,180438429 | 2,392049 |
| O95299  | NADH dehydrogenase [ubiquinone] 1 alpha subcomplex subunit 10, mitochondrial OS=Homo sapiens OX=9606 GN=NDUF          | -0,265826981 | 2,388737 |
| P08243  | Asparagine synthetase [glutamine-hydrolyzing] OS=Homo sapiens OX=9606 GN=ASNS PE=1 SV=4                               | 0,251358331  | 2,388058 |
| P35658  | Nuclear pore complex protein Nup214 OS=Homo sapiens OX=9606 GN=NUP214 PE=1 SV=2                                       | 0,180204878  | 2,387898 |
| Q7L804  | Rab11 family-interacting protein 2 OS=Homo sapiens OX=9606 GN=RAB11FIP2 PE=1 SV=1                                     | -1,344366819 | 2,387302 |
| P15559  | NAD(P)H dehydrogenase [quinone] 1 OS=Homo sapiens OX=9606 GN=NQO1 PE=1 SV=1                                           | 0,238936267  | 2,38619  |
| Q14498  | RNA-binding protein 39 OS=Homo sapiens OX=9606 GN=RBM39 PE=1 SV=2                                                     | 0,185158097  | 2,386024 |
| O95816  | BAG family molecular chaperone regulator 2 OS=Homo sapiens OX=9606 GN=BAG2 PE=1 SV=1                                  | 0,251181196  | 2,385895 |
| Q9BRF8  | Serine/threonine-protein phosphatase CPPED1 OS=Homo sapiens OX=9606 GN=CPPED1 PE=1 SV=3                               | 0,22819452   | 2,384529 |
| Q9UJX3  | Anaphase-promoting complex subunit 7 OS=Homo sapiens OX=9606 GN=ANAPC7 PE=1 SV=4                                      | -0,228000546 | 2,381885 |
| P04062  | Lysosomal acid glucosylceramidase OS=Homo sapiens OX=9606 GN=GBA PE=1 SV=3                                            | -0,227977631 | 2,381573 |
| Q8WXF1  | Paraspeckle component 1 OS=Homo sapiens OX=9606 GN=PSPC1 PE=1 SV=1                                                    | -0,190307446 | 2,379974 |
| Q8N806  | Putative E3 ubiquitin-protein ligase UBR7 OS=Homo sapiens OX=9606 GN=UBR7 PE=1 SV=2                                   | -0,416236243 | 2,377432 |
| Q8IY37  | Probable ATP-dependent RNA helicase DHX37 OS=Homo sapiens OX=9606 GN=DHX37 PE=1 SV=1                                  | 0,664084942  | 2,376074 |
| Q96P22  | Protein FAM111A OS=Homo sapiens OX=9606 GN=FAM111A PE=1 SV=2                                                          | -0,497245912 | 2,374026 |
| Q12789  | General transcription factor 3C polypeptide 1 OS=Homo sapiens OX=9606 GN=GTF3C1 PE=1 SV=4                             | -0,1627131   | 2,373313 |
| P82663  | 28S ribosomal protein S25, mitochondrial OS=Homo sapiens OX=9606 GN=MRPS25 PE=1 SV=1                                  | -0,663016565 | 2,372866 |
| Q8N5F7  | NF-kappa-B activating protein OS=Homo sapiens OX=9606 GN=NKAP PE=1 SV=1                                               | 0,719288885  | 2,370865 |
| Q1KMD3  | Heterogeneous nuclear ribonucleoprotein U-like protein 2 OS=Homo sapiens OX=9606 GN=HNRNPUL2 PE=1 SV=1                | -0,162543765 | 2,369977 |
| Q13557  | Calcium/calmodulin-dependent protein kinase type II subunit delta OS=Homo sapiens OX=9606 GN=CAMK2D PE=1 SV=3         | 0,302301842  | 2,369817 |
| Q9NRR8  | CDC42 small effector protein 1 OS=Homo sapiens OX=9606 GN=CDC42SE1 PE=1 SV=1                                          | 1,332978389  | 2,362488 |
| O43809  | Cleavage and polyadenylation specificity factor subunit 5 OS=Homo sapiens OX=9606 GN=NUDT21 PE=1 SV=1                 | -0,236991272 | 2,361052 |
| Q5T8P6  | RNA-binding protein 26 OS=Homo sapiens OX=9606 GN=RBM26 PE=1 SV=3                                                     | 0,413607152  | 2,3606   |
| O43264  | Centromere/kinetochore protein zw10 homolog OS=Homo sapiens OX=9606 GN=ZW10 PE=1 SV=3                                 | -0,217159949 | 2,359857 |
| Q9UBT2  | SUMO-activating enzyme subunit 2 OS=Homo sapiens OX=9606 GN=UBA2 PE=1 SV=2                                            | -0,16971146  | 2,359706 |
| Q92901  | 60S ribosomal protein L3-like OS=Homo sapiens OX=9606 GN=RPL3L PE=2 SV=3                                              | 1,408662318  | 2,358711 |
| Q9BT7E  | DCN1-like protein 5 OS=Homo sapiens OX=9606 GN=DCUN1D5 PE=1 SV=1                                                      | -0,465762637 | 2,356995 |
| P11717  | Cation-independent mannose-6-phosphate receptor OS=Homo sapiens OX=9606 GN=IGF2R PE=1 SV=3                            | 0,094268317  | 2,35536  |
| O75367  | Core histone macro-H2A.1 OS=Homo sapiens OX=9606 GN=H2AFY PE=1 SV=4                                                   | 0,208639775  | 2,354715 |
| Q4G0N4  | NAD kinase 2, mitochondrial OS=Homo sapiens OX=9606 GN=NADK2 PE=1 SV=2                                                | 0,787161099  | 2,353117 |
| Q9UPQ0  | LIM and calponin homology domains-containing protein 1 OS=Homo sapiens OX=9606 GN=LIMCH1 PE=1 SV=4                    | 0,412345022  | 2,352517 |
| Q4KMP7  | TBC1 domain family member 10B OS=Homo sapiens OX=9606 GN=TBC1D10B PE=1 SV=3                                           | -0,326965361 | 2,352408 |
| Q8TEA8  | D-aminoacyl-tRNA deacylase 1 OS=Homo sapiens OX=9606 GN=DTA1 PE=1 SV=2                                                | -0,412316532 | 2,352335 |
| Q9P2N5  | RNA-binding protein 27 OS=Homo sapiens OX=9606 GN=RBM27 PE=1 SV=2                                                     | -0,262511989 | 2,350891 |
| P41236  | Protein phosphatase inhibitor 2 OS=Homo sapiens OX=9606 GN=PPP1R2 PE=1 SV=2                                           | -0,492576535 | 2,350887 |
| Q8ND04  | Protein SMG8 OS=Homo sapiens OX=9606 GN=SMG8 PE=1 SV=1                                                                | -0,492449415 | 2,350256 |
| P22059  | Oxysterol-binding protein 1 OS=Homo sapiens OX=9606 GN=OSBP PE=1 SV=1                                                 | 0,225661985  | 2,350071 |
| Q99816  | Tumor susceptibility gene 101 protein OS=Homo sapiens OX=9606 GN=TSG101 PE=1 SV=2                                     | -0,236134878 | 2,350006 |
| Q9H900  | Protein zwilch homolog OS=Homo sapiens OX=9606 GN=ZWILCH PE=1 SV=2                                                    | -0,411936584 | 2,349901 |
| Q96EA4  | Protein Spindly OS=Homo sapiens OX=9606 GN=SPDL1 PE=1 SV=2                                                            | -0,165192189 | 2,349343 |
| O96000  | NADH dehydrogenase [ubiquinone] 1 beta subcomplex subunit 10 OS=Homo sapiens OX=9606 GN=NDUFB10 PE=1 SV=3             | -0,326409438 | 2,347565 |
| P10586  | Receptor-type tyrosine-protein phosphatase F OS=Homo sapiens OX=9606 GN=PTPRF PE=1 SV=2                               | 0,411370412  | 2,346275 |
| P49411  | Elongation factor Tu, mitochondrial OS=Homo sapiens OX=9606 GN=TUFM PE=1 SV=2                                         | -0,157766977 | 2,34397  |
| Q15262  | Receptor-type tyrosine-protein phosphatase kappa OS=Homo sapiens OX=9606 GN=PTPRK PE=1 SV=2                           | 0,561794855  | 2,34338  |

|        |                                                                                                           |              |          |
|--------|-----------------------------------------------------------------------------------------------------------|--------------|----------|
| P60604 | Ubiquitin-conjugating enzyme E2 G2 OS=Homo sapiens OX=9606 GN=UBE2G2 PE=1 SV=1                            | -0,490993739 | 2,343032 |
| Q8NFH4 | Nucleoporin Nup37 OS=Homo sapiens OX=9606 GN=NUP37 PE=1 SV=1                                              | -0,299470929 | 2,342394 |
| P20742 | Pregnancy zone protein OS=Homo sapiens OX=9606 GN=PZP PE=1 SV=4                                           | 0,473400885  | 2,339815 |
| P67870 | Casein kinase II subunit beta OS=Homo sapiens OX=9606 GN=CSNK2B PE=1 SV=1                                 | -0,299145207 | 2,339242 |
| Q9HBD1 | Roquin-2 OS=Homo sapiens OX=9606 GN=RC3H2 PE=1 SV=2                                                       | 0,850914102  | 2,33666  |
| Q9Y248 | DNA replication complex GINS protein PSF2 OS=Homo sapiens OX=9606 GN=GINS2 PE=1 SV=1                      | -0,409583732 | 2,33483  |
| Q9NKR5 | Ankyrin repeat domain-containing protein 10 OS=Homo sapiens OX=9606 GN=ANKRD10 PE=1 SV=2                  | 1,305732268  | 2,334548 |
| Q96FV2 | Secernin-2 OS=Homo sapiens OX=9606 GN=SCRN2 PE=1 SV=3                                                     | -0,324734886 | 2,332984 |
| B1ANS9 | WD repeat-containing protein 64 OS=Homo sapiens OX=9606 GN=WDR64 PE=2 SV=1                                | 0,209731012  | 2,330509 |
| O43665 | Regulator of G-protein signaling 10 OS=Homo sapiens OX=9606 GN=RG510 PE=1 SV=3                            | -0,359084076 | 2,329064 |
| P49454 | Centromere protein F OS=Homo sapiens OX=9606 GN=CENPF PE=1 SV=3                                           | 0,359054862  | 2,328841 |
| Q15370 | Elongin-B OS=Homo sapiens OX=9606 GN=ELOB PE=1 SV=1                                                       | -0,324161016 | 2,327989 |
| Q05209 | Tyrosine-protein phosphatase non-receptor type 12 OS=Homo sapiens OX=9606 GN=PTPN12 PE=1 SV=3             | 0,223918688  | 2,326434 |
| Q9UGV2 | Protein NDRG3 OS=Homo sapiens OX=9606 GN=NDRG3 PE=1 SV=2                                                  | 0,323943296  | 2,326095 |
| Q9UBU8 | Mortality factor 4-like protein 1 OS=Homo sapiens OX=9606 GN=MORF4L1 PE=1 SV=2                            | -0,323942718 | 2,32609  |
| P27361 | Mitogen-activated protein kinase 3 OS=Homo sapiens OX=9606 GN=MAPK3 PE=1 SV=4                             | 0,223819024  | 2,325085 |
| Q10713 | Mitochondrial-processing peptidase subunit alpha OS=Homo sapiens OX=9606 GN=PMPCA PE=1 SV=2               | -0,223718408 | 2,323723 |
| Q9NUD5 | Zinc finger CCHC domain-containing protein 3 OS=Homo sapiens OX=9606 GN=ZCCHC3 PE=1 SV=2                  | -0,687586326 | 2,32181  |
| Q5VU36 | Regulator of G-protein signaling 10 OS=Homo sapiens OX=9606 GN=SPATA31A5 PE=3 SV=1                        | 0,645934743  | 2,321146 |
| O75717 | WD repeat and HMG-box DNA-binding protein 1 OS=Homo sapiens OX=9606 GN=WDHD1 PE=1 SV=1                    | -0,322836294 | 2,316466 |
| Q06033 | Inter-alpha-trypsin inhibitor heavy chain H3 OS=Homo sapiens OX=9606 GN=ITH3 PE=1 SV=2                    | -0,48554591  | 2,315956 |
| Q9H3N1 | Thioredoxin-related transmembrane protein 1 OS=Homo sapiens OX=9606 GN=TMX1 PE=1 SV=1                     | -0,485218703 | 2,314328 |
| O95336 | 6-phosphogluconolactonase OS=Homo sapiens OX=9606 GN=PGLS PE=1 SV=2                                       | 0,223017245  | 2,314238 |
| Q96GG9 | DCN1-like protein 1 OS=Homo sapiens OX=9606 GN=DCUN1D1 PE=1 SV=1                                          | 0,322274583  | 2,311582 |
| P48163 | NADP-dependent malic enzyme OS=Homo sapiens OX=9606 GN=ME1 PE=1 SV=1                                      | 0,175743207  | 2,309179 |
| Q9BXM0 | Periaxin OS=Homo sapiens OX=9606 GN=PRX PE=1 SV=2                                                         | -1,288705589 | 2,308216 |
| Q96DB5 | Regulator of microtubule dynamics protein 1 OS=Homo sapiens OX=9606 GN=RMDN1 PE=1 SV=1                    | -0,295531635 | 2,304324 |
| P11908 | Ribose-phosphate pyrophosphokinase 2 OS=Homo sapiens OX=9606 GN=PRPS2 PE=1 SV=2                           | -0,213212986 | 2,303806 |
| Q9ULX6 | A-kinase anchor protein 8-like OS=Homo sapiens OX=9606 GN=AKAP8L PE=1 SV=4                                | 0,295433319  | 2,303375 |
| O14562 | Ubiquitin domain-containing protein UBFD1 OS=Homo sapiens OX=9606 GN=UBFD1 PE=1 SV=2                      | 0,355598864  | 2,302487 |
| Q722K8 | G protein-regulated inducer of neurite outgrowth 1 OS=Homo sapiens OX=9606 GN=GPRIN1 PE=1 SV=2            | -0,482765956 | 2,302115 |
| O75608 | Acyl-protein thioesterase 1 OS=Homo sapiens OX=9606 GN=LYPLA1 PE=1 SV=1                                   | -0,321159008 | 2,301886 |
| P09884 | DNA polymerase alpha catalytic subunit OS=Homo sapiens OX=9606 GN=POLA1 PE=1 SV=2                         | -0,212925219 | 2,299735 |
| Q96RE7 | Nucleus accumbens-associated protein 1 OS=Homo sapiens OX=9606 GN=NACC1 PE=1 SV=1                         | -0,274430056 | 2,297378 |
| Q9P059 | Transmembrane protein 14C OS=Homo sapiens OX=9606 GN=TMEM14C PE=1 SV=1                                    | -0,481503722 | 2,295826 |
| O75051 | Plexin-A2 OS=Homo sapiens OX=9606 GN=PLXNA2 PE=1 SV=4                                                     | 0,403411398  | 2,295276 |
| Q8NBM8 | Prenylcysteine oxidase-like OS=Homo sapiens OX=9606 GN=PCYOX1L PE=1 SV=2                                  | -0,638652375 | 2,294683 |
| P84101 | Small EDRK-rich factor 2 OS=Homo sapiens OX=9606 GN=SERF2 PE=1 SV=1                                       | -1,955256071 | 2,292356 |
| Q9Y314 | Nitric oxide synthase-interacting protein OS=Homo sapiens OX=9606 GN=NOSIP PE=1 SV=1                      | 0,221177536  | 2,289404 |
| Q92600 | CCR4-NOT transcription complex subunit 9 OS=Homo sapiens OX=9606 GN=CNOT9 PE=1 SV=1                       | 0,35372907   | 2,288236 |
| Q13418 | Integrin-linked protein kinase OS=Homo sapiens OX=9606 GN=ILK PE=1 SV=2                                   | -0,174543596 | 2,288041 |
| O15027 | Protein transport protein Sec16A OS=Homo sapiens OX=9606 GN=SEC16A PE=1 SV=4                              | 0,122770673  | 2,287033 |
| Q92466 | DNA damage-binding protein 2 OS=Homo sapiens OX=9606 GN=DDB2 PE=1 SV=1                                    | -0,231213823 | 2,286804 |
| Q02952 | A-kinase anchor protein 12 OS=Homo sapiens OX=9606 GN=AKAP12 PE=1 SV=4                                    | -0,102785507 | 2,285059 |
| Q53HC9 | EARP and GARP complex-interacting protein 1 OS=Homo sapiens OX=9606 GN=EIPR1 PE=1 SV=2                    | -0,293393161 | 2,283703 |
| Q15428 | Splicing factor 3A subunit 2 OS=Homo sapiens OX=9606 GN=SF3A2 PE=1 SV=2                                   | -0,230917312 | 2,28301  |
| Q9NVM6 | DNAJ homolog subfamily C member 17 OS=Homo sapiens OX=9606 GN=DNAJC17 PE=1 SV=1                           | -0,63473166  | 2,281999 |
| Q9BXP5 | Serrate RNA effector molecule homolog OS=Homo sapiens OX=9606 GN=SRRT PE=1 SV=1                           | -0,174093552 | 2,280165 |
| Q9BVC5 | Ashwin OS=Homo sapiens OX=9606 GN=C2orf49 PE=1 SV=1                                                       | -1,253973124 | 2,280036 |
| Q5TAQ9 | DDB1- and CUL4-associated factor 8 OS=Homo sapiens OX=9606 GN=DCAF8 PE=1 SV=1                             | -0,478073809 | 2,278717 |
| Q9UNN5 | FAS-associated factor 1 OS=Homo sapiens OX=9606 GN=FAF1 PE=1 SV=2                                         | -0,256038451 | 2,277391 |
| Q96R06 | Sperm-associated antigen 5 OS=Homo sapiens OX=9606 GN=SPAG5 PE=1 SV=2                                     | -0,255832028 | 2,275056 |
| O94966 | Ubiquitin carboxyl-terminal hydrolase 19 OS=Homo sapiens OX=9606 GN=USP19 PE=1 SV=2                       | -0,477239783 | 2,274553 |
| Q9P2J8 | Zinc finger protein 624 OS=Homo sapiens OX=9606 GN=ZNF624 PE=1 SV=3                                       | 1,03230344   | 2,273127 |
| Q15050 | Ribosome biogenesis regulatory protein homolog OS=Homo sapiens OX=9606 GN=RRS1 PE=1 SV=2                  | -0,399365484 | 2,269337 |
| P46734 | Dual specificity mitogen-activated protein kinase kinase 3 OS=Homo sapiens OX=9606 GN=MAP2K3 PE=1 SV=2    | 0,219435609  | 2,265961 |
| Q12931 | Heat shock protein 75 kDa, mitochondrial OS=Homo sapiens OX=9606 GN=TRAP1 PE=1 SV=3                       | -0,173083968 | 2,262531 |
| Q8WZA9 | Immunity-related GTPase family Q protein OS=Homo sapiens OX=9606 GN=IRGQ PE=1 SV=1                        | 0,241010063  | 2,262517 |
| P23368 | NAD-dependent malic enzyme, mitochondrial OS=Homo sapiens OX=9606 GN=ME2 PE=1 SV=1                        | -0,209936329 | 2,257578 |
| Q6ZNU1 | Neurobechin-like protein 2 OS=Homo sapiens OX=9606 GN=NBEAL2 PE=1 SV=2                                    | 0,189452671  | 2,257392 |
| P48378 | DNA-binding protein RFX2 OS=Homo sapiens OX=9606 GN=RFX2 PE=1 SV=2                                        | 1,999442345  | 2,255753 |
| Q7LG56 | Ribonucleoside-diphosphate reductase subunit M2 B OS=Homo sapiens OX=9606 GN=RRM2B PE=1 SV=1              | 0,473371216  | 2,255225 |
| Q9H814 | Phosphorylated adapter RNA export protein OS=Homo sapiens OX=9606 GN=PHAX PE=1 SV=1                       | 0,290202424  | 2,252996 |
| O14744 | Protein arginine N-methyltransferase 5 OS=Homo sapiens OX=9606 GN=PRMT5 PE=1 SV=4                         | 0,177349997  | 2,252751 |
| Q12830 | Nucleosome-remodeling factor subunit BPTF OS=Homo sapiens OX=9606 GN=BPTF PE=1 SV=3                       | 0,571718203  | 2,251156 |
| Q96CV9 | Optineurin OS=Homo sapiens OX=9606 GN=OPTN PE=1 SV=3                                                      | -0,182350701 | 2,248541 |
| Q86WR0 | Coiled-coil domain-containing protein 25 OS=Homo sapiens OX=9606 GN=CCDC25 PE=1 SV=2                      | -0,471735969 | 2,24704  |
| Q7L7X3 | Serine/threonine-protein kinase TAO1 OS=Homo sapiens OX=9606 GN=TAO1 PE=1 SV=1                            | 0,348091475  | 2,245307 |
| A6NCE7 | Microtubule-associated proteins 1A/1B light chain 3 beta 2 OS=Homo sapiens OX=9606 GN=MAP1LC3B2 PE=2 SV=1 | 0,494270886  | 2,24496  |
| Q95833 | Chloride intracellular channel protein 3 OS=Homo sapiens OX=9606 GN=CLIC3 PE=1 SV=2                       | 0,19386784   | 2,239979 |
| Q96C36 | Pyroline-5-carboxylate reductase 2 OS=Homo sapiens OX=9606 GN=PYCR2 PE=1 SV=1                             | -0,227433554 | 2,238571 |
| Q9NPG1 | Frizzled-3 OS=Homo sapiens OX=9606 GN=FZD3 PE=1 SV=1                                                      | 0,270112408  | 2,237779 |
| Q5T482 | Inactive glycosyltransferase 25 family member 3 OS=Homo sapiens OX=9606 GN=CERCAM PE=1 SV=1               | -0,383028549 | 2,237696 |
| Q5VW36 | Focadhesin OS=Homo sapiens OX=9606 GN=FOCAD PE=1 SV=1                                                     | -0,268578719 | 2,235981 |
| Q9UN37 | Vacuolar protein sorting-associated protein 4A OS=Homo sapiens OX=9606 GN=VPS4A PE=1 SV=1                 | -0,268564743 | 2,235835 |
| P82914 | 28S ribosomal protein S15, mitochondrial OS=Homo sapiens OX=9606 GN=MRPS15 PE=1 SV=1                      | -0,620229033 | 2,23476  |
| Q8IX12 | Cell division cycle and apoptosis regulator protein 1 OS=Homo sapiens OX=9606 GN=CCAR1 PE=1 SV=2          | 0,193505454  | 2,234462 |
| Q9H223 | EH domain-containing protein 4 OS=Homo sapiens OX=9606 GN=EHD4 PE=1 SV=1                                  | 0,176252718  | 2,234228 |
| Q96KQ7 | Histone-lysine N-methyltransferase EHMT2 OS=Homo sapiens OX=9606 GN=EHMT2 PE=1 SV=3                       | -0,619535051 | 2,232487 |
| A11020 | RNA-binding protein MEX3A OS=Homo sapiens OX=9606 GN=MEX3A PE=1 SV=1                                      | -0,505114792 | 2,231399 |
| Q9NX47 | E3 ubiquitin-protein ligase MARCH5 OS=Homo sapiens OX=9606 GN=MARCH5 PE=1 SV=1                            | -1,209232395 | 2,231322 |
| Q15637 | Splicing factor 1 OS=Homo sapiens OX=9606 GN=SF1 PE=1 SV=4                                                | -0,208054684 | 2,231158 |
| O43819 | Protein SCO2 homolog, mitochondrial OS=Homo sapiens OX=9606 GN=SCO2 PE=1 SV=3                             | -0,47573305  | 2,2256   |
| O75521 | Enoyl-CoA delta isomerase 2, mitochondrial OS=Homo sapiens OX=9606 GN=ECI2 PE=1 SV=4                      | 0,216278225  | 2,223645 |
| Q96A65 | Exocyst complex component 4 OS=Homo sapiens OX=9606 GN=EXOC4 PE=1 SV=1                                    | 0,154899259  | 2,221157 |
| Q9UKM9 | RNA-binding protein Raly OS=Homo sapiens OX=9606 GN=RALY PE=1 SV=1                                        | -0,225999392 | 2,220347 |
| P17174 | Aspartate aminotransferase, cytoplasmic OS=Homo sapiens OX=9606 GN=GOT1 PE=1 SV=3                         | 0,175338414  | 2,218833 |
| O60216 | Double-strand-break repair protein rad21 homolog OS=Homo sapiens OX=9606 GN=RAD21 PE=1 SV=2               | -0,225824593 | 2,218128 |
| P28070 | Proteasome subunit beta type-4 OS=Homo sapiens OX=9606 GN=PSMB4 PE=1 SV=4                                 | -0,286473432 | 2,217203 |
| P51610 | Host cell factor 1 OS=Homo sapiens OX=9606 GN=HCFC1 PE=1 SV=2                                             | -0,128833016 | 2,216552 |
| O15126 | Secretory carrier-associated membrane protein 1 OS=Homo sapiens OX=9606 GN=SCAMP1 PE=1 SV=2               | -0,344243239 | 2,216037 |

|        |                                                                                                                   |              |          |
|--------|-------------------------------------------------------------------------------------------------------------------|--------------|----------|
| Q9UKV3 | Apoptotic chromatin condensation inducer in the nucleus OS=Homo sapiens OX=9606 GN=ACIN1 PE=1 SV=2                | 0,175168622  | 2,215978 |
| Q7L775 | EPM2A-interacting protein 1 OS=Homo sapiens OX=9606 GN=EPM2AIP1 PE=1 SV=1                                         | -0,390490633 | 2,212415 |
| Q8WTS6 | Histone-lysine N-methyltransferase SETD7 OS=Homo sapiens OX=9606 GN=SETD7 PE=1 SV=1                               | 0,464592189  | 2,211238 |
| P17301 | Integrin alpha-2 OS=Homo sapiens OX=9606 GN=ITGA2 PE=1 SV=1                                                       | 0,265944753  | 2,208459 |
| Q13042 | Cell division cycle protein 16 homolog OS=Homo sapiens OX=9606 GN=CDC16 PE=1 SV=2                                 | 0,265631131  | 2,205187 |
| Q9BVP2 | Guanine nucleotide-binding protein-like 3 OS=Homo sapiens OX=9606 GN=GNL3 PE=1 SV=2                               | -0,342800018 | 2,205068 |
| P06493 | Cyclin-dependent kinase 1 OS=Homo sapiens OX=9606 GN=CDK1 PE=1 SV=3                                               | -0,19140364  | 2,202546 |
| P55265 | Double-stranded RNA-specific adenosine deaminase OS=Homo sapiens OX=9606 GN=ADAR PE=1 SV=4                        | -0,122624858 | 2,200132 |
| Q9Y536 | #N/D                                                                                                              | 0,462299614  | 2,199727 |
| Q8WUA2 | Peptidyl-prolyl cis-trans isomerase-like 4 OS=Homo sapiens OX=9606 GN=PP14 PE=1 SV=1                              | 0,30929257   | 2,199086 |
| P61086 | Ubiquitin-conjugating enzyme E2 K OS=Homo sapiens OX=9606 GN=UBE2K PE=1 SV=3                                      | -0,214260625 | 2,196725 |
| Q86X12 | Condensin-2 complex subunit G2 OS=Homo sapiens OX=9606 GN=NCAPG2 PE=1 SV=1                                        | -0,264795812 | 2,196476 |
| Q9Y6A5 | Transforming acidic coiled-coil-containing protein 3 OS=Homo sapiens OX=9606 GN=TACC3 PE=1 SV=1                   | -0,284245917 | 2,195872 |
| Q9Y2R5 | 28S ribosomal protein S17, mitochondrial OS=Homo sapiens OX=9606 GN=MRPS17 PE=1 SV=1                              | -0,460314877 | 2,189754 |
| P40429 | 60S ribosomal protein L13a OS=Homo sapiens OX=9606 GN=RPL13A PE=1 SV=2                                            | -0,23474577  | 2,187368 |
| Q05932 | Folypolyglutamate synthase, mitochondrial OS=Homo sapiens OX=9606 GN=FPFS PE=1 SV=3                               | -0,34040026  | 2,186838 |
| Q9NXE8 | Pre-mRNA-splicing factor CWC25 homolog OS=Homo sapiens OX=9606 GN=CWC25 PE=1 SV=1                                 | 0,622392391  | 2,186063 |
| Q13263 | Transcription intermediary factor 1-beta OS=Homo sapiens OX=9606 GN=TRIM28 PE=1 SV=5                              | -0,127472585 | 2,18491  |
| P49458 | Signal recognition particle 9 kDa protein OS=Homo sapiens OX=9606 GN=SRP9 PE=1 SV=2                               | -0,339882629 | 2,179805 |
| Q13144 | Translation initiation factor eIF-2B subunit epsilon OS=Homo sapiens OX=9606 GN=EIF2B5 PE=1 SV=3                  | -0,263490334 | 2,182879 |
| P00441 | Superoxide dismutase [Cu-Zn] OS=Homo sapiens OX=9606 GN=SOD1 PE=1 SV=2                                            | 0,339521605  | 2,180166 |
| O00469 | Procollagen-lysine,2-oxoglutarate 5-dioxygenase 2 OS=Homo sapiens OX=9606 GN=PLOD2 PE=1 SV=2                      | 0,178128659  | 2,179805 |
| P00505 | Aspartate aminotransferase, mitochondrial OS=Homo sapiens OX=9606 GN=GOT2 PE=1 SV=3                               | 0,173009729  | 2,179786 |
| P22304 | Iduronate 2-sulfatase OS=Homo sapiens OX=9606 GN=IDS PE=1 SV=1                                                    | -0,728057704 | 2,17828  |
| Q969G3 | SWI/SNF-related matrix-associated actin-dependent regulator of chromatin subfamily E member 1 OS=Homo sapiens OX= | -0,247013715 | 2,17585  |
| Q96KM6 | Zinc finger protein 512B OS=Homo sapiens OX=9606 GN=ZNF512B PE=1 SV=1                                             | -0,597341401 | 2,173153 |
| Q76M96 | Coiled-coil domain-containing protein 80 OS=Homo sapiens OX=9606 GN=CCDC80 PE=1 SV=1                              | -0,306254485 | 2,172872 |
| Q724H3 | HD domain-containing protein 2 OS=Homo sapiens OX=9606 GN=HDDC2 PE=1 SV=1                                         | -0,384083164 | 2,171305 |
| P49589 | Cysteine--tRNA ligase, cytoplasmic OS=Homo sapiens OX=9606 GN=CARS PE=1 SV=3                                      | 0,14307542   | 2,17023  |
| Q9H0U3 | Magnesium transporter protein 1 OS=Homo sapiens OX=9606 GN=MAGT1 PE=1 SV=1                                        | -0,455684912 | 2,16646  |
| Q8NFW8 | N-acetylneuraminatase cytidylyltransferase OS=Homo sapiens OX=9606 GN=CMAS PE=1 SV=2                              | 0,337493658  | 2,164774 |
| P82933 | 28S ribosomal protein S9, mitochondrial OS=Homo sapiens OX=9606 GN=MRPS9 PE=1 SV=2                                | -0,26169667  | 2,164226 |
| Q6P996 | Pyridoxal-dependent decarboxylase domain-containing protein 1 OS=Homo sapiens OX=9606 GN=PDxDC1 PE=1 SV=2         | 0,163021861  | 2,162919 |
| Q96AE4 | Far upstream element-binding protein 1 OS=Homo sapiens OX=9606 GN=FUBP1 PE=1 SV=3                                 | -0,142686095 | 2,162299 |
| Q969T9 | WW domain-binding protein 2 OS=Homo sapiens OX=9606 GN=WBP2 PE=1 SV=1                                             | 0,304641236  | 2,15897  |
| Q99700 | Ataxin-2 OS=Homo sapiens OX=9606 GN=ATXN2 PE=1 SV=2                                                               | 0,280236157  | 2,15757  |
| Q96A33 | Coiled-coil domain-containing protein 47 OS=Homo sapiens OX=9606 GN=CCDC47 PE=1 SV=1                              | 0,202622811  | 2,155412 |
| Q8N1F7 | Nuclear pore complex protein Nup93 OS=Homo sapiens OX=9606 GN=NUP93 PE=1 SV=2                                     | -0,13469049  | 2,155145 |
| O00483 | Cytochrome c oxidase subunit NDUFA4 OS=Homo sapiens OX=9606 GN=NDUFA4 PE=1 SV=1                                   | -0,453141897 | 2,153648 |
| Q9ULH7 | Myocardin-related transcription factor B OS=Homo sapiens OX=9606 GN=MYOBT PE=1 SV=3                               | -0,178513727 | 2,152359 |
| Q15084 | Protein disulfide-isomerase A6 OS=Homo sapiens OX=9606 GN=PDISA6 PE=1 SV=1                                        | 0,176317954  | 2,150542 |
| Q9HAU6 | Putative translationally-controlled tumor protein-like protein TPT1P8 OS=Homo sapiens OX=9606 GN=TPT1P8 PE=5 SV=2 | -1,136732322 | 2,149007 |
| Q71RC2 | La-related protein 4 OS=Homo sapiens OX=9606 GN=LARP4 PE=1 SV=3                                                   | 0,260130874  | 2,147971 |
| Q9NR19 | Acetyl-coenzyme A synthetase, cytoplasmic OS=Homo sapiens OX=9606 GN=ACSS2 PE=1 SV=1                              | -0,451990548 | 2,147844 |
| Q14353 | Guanidinoacetate N-methyltransferase OS=Homo sapiens OX=9606 GN=GAMT PE=1 SV=1                                    | -0,279190928 | 2,147606 |
| O96005 | Cleft lip and palate transmembrane protein 1 OS=Homo sapiens OX=9606 GN=CLPTM1 PE=1 SV=1                          | -0,334704687 | 2,143622 |
| O43765 | Small glutamine-rich tetrapeptide repeat-containing protein alpha OS=Homo sapiens OX=9606 GN=SGTA PE=1 SV=1       | 0,219839217  | 2,142534 |
| Q8IV48 | 3'-5' exoribonuclease 1 OS=Homo sapiens OX=9606 GN=ERI1 PE=1 SV=3                                                 | -0,334514619 | 2,142181 |
| O43426 | Synaptotagmin-1 OS=Homo sapiens OX=9606 GN=SYNJ1 PE=1 SV=2                                                        | 0,334488854  | 2,141985 |
| Q9NQH7 | #N/D                                                                                                              | 0,298193494  | 2,141611 |
| P50613 | Cyclin-dependent kinase 7 OS=Homo sapiens OX=9606 GN=CDK7 PE=1 SV=1                                               | -0,450594011 | 2,140801 |
| P23246 | Splicing factor, proline- and glutamine-rich OS=Homo sapiens OX=9606 GN=SFPQ PE=1 SV=2                            | -0,147431212 | 2,13981  |
| Q9Y5X2 | Sorting nexin-8 OS=Homo sapiens OX=9606 GN=SNX8 PE=1 SV=1                                                         | -0,302089108 | 2,137005 |
| P12235 | ADP/ATP translocase 1 OS=Homo sapiens OX=9606 GN=SLC25A4 PE=1 SV=4                                                | 0,378654973  | 2,136474 |
| Q9H0X9 | Oxysterol-binding protein-related protein 5 OS=Homo sapiens OX=9606 GN=OSBPL5 PE=1 SV=1                           | -0,301829497 | 2,134772 |
| Q8TB72 | Pumilio homolog 2 OS=Homo sapiens OX=9606 GN=PUM2 PE=1 SV=2                                                       | -0,378388725 | 2,134766 |
| Q86TP1 | Exopolyphosphatase PRUNE1 OS=Homo sapiens OX=9606 GN=PRUNE1 PE=1 SV=2                                             | -0,58511596  | 2,134654 |
| O15381 | Nuclear valosin-containing protein-like OS=Homo sapiens OX=9606 GN=NVL PE=1 SV=1                                  | -0,589314113 | 2,132385 |
| Q9GZV4 | #N/D                                                                                                              | 0,333205234  | 2,132257 |
| O00754 | Lysosomal alpha-mannosidase OS=Homo sapiens OX=9606 GN=MAN2B1 PE=1 SV=3                                           | -0,219003052 | 2,132031 |
| O75152 | Zinc finger CCHC domain-containing protein 11A OS=Homo sapiens OX=9606 GN=ZC3H11A PE=1 SV=3                       | 0,30143575   | 2,131387 |
| P11216 | Glycogen phosphorylase, brain form OS=Homo sapiens OX=9606 GN=PYGB PE=1 SV=5                                      | 0,115002294  | 2,130153 |
| P04040 | Catalase OS=Homo sapiens OX=9606 GN=CAT PE=1 SV=3                                                                 | 0,193289829  | 2,129898 |
| Q15022 | Polycomb protein SUZ12 OS=Homo sapiens OX=9606 GN=SUZ12 PE=1 SV=3                                                 | -0,448290367 | 2,129175 |
| Q9UH88 | Septin-9 OS=Homo sapiens OX=9606 GN=SEPTIN9 PE=1 SV=2                                                             | -0,126988796 | 2,128609 |
| Q969V3 | Nicalin OS=Homo sapiens OX=9606 GN=NCLN PE=1 SV=2                                                                 | -0,21839439  | 2,124395 |
| Q8NF91 | Nesprin-1 OS=Homo sapiens OX=9606 GN=SYNE1 PE=1 SV=4                                                              | -0,218075193 | 2,120393 |
| Q96GX5 | Serine/threonine-protein kinase greatwall OS=Homo sapiens OX=9606 GN=MASTL PE=1 SV=1                              | -0,446323762 | 2,119243 |
| Q9Y6Y8 | SEC23-interacting protein OS=Homo sapiens OX=9606 GN=SEC23IP PE=1 SV=1                                            | -0,164671219 | 2,117413 |
| Q96CS2 | HAUS augmin-like complex subunit 1 OS=Homo sapiens OX=9606 GN=HAUS1 PE=1 SV=1                                     | -0,584813699 | 2,117291 |
| P53677 | AP-3 complex subunit mu-2 OS=Homo sapiens OX=9606 GN=AP3M2 PE=2 SV=1                                              | -0,444503764 | 2,110045 |
| O00471 | Exocyst complex component 5 OS=Homo sapiens OX=9606 GN=EXOC5 PE=1 SV=1                                            | 0,275223995  | 2,109871 |
| Q9H4A5 | Golgi phosphoprotein 3-like OS=Homo sapiens OX=9606 GN=GOLPH3L PE=1 SV=1                                          | -0,444167638 | 2,108345 |
| Q9UBP6 | tRNA (guanine-N(7))-methyltransferase OS=Homo sapiens OX=9606 GN=METT1L PE=1 SV=1                                 | -0,404462003 | 2,103862 |
| Q01081 | Splicing factor U2AF 35 kDa subunit OS=Homo sapiens OX=9606 GN=U2AF1 PE=1 SV=3                                    | -0,255700869 | 2,102129 |
| Q9Y2X7 | ARF GTPase-activating protein GIT1 OS=Homo sapiens OX=9606 GN=GIT1 PE=1 SV=2                                      | -0,191281252 | 2,100999 |
| P39060 | Collagen alpha-1(XVIII) chain OS=Homo sapiens OX=9606 GN=COL18A1 PE=1 SV=5                                        | 0,373038387  | 2,100435 |
| O14979 | Heterogeneous nuclear ribonucleoprotein D-like OS=Homo sapiens OX=9606 GN=HNRNPDL PE=1 SV=3                       | -0,240229472 | 2,100258 |
| P26038 | Moesin OS=Homo sapiens OX=9606 GN=MSN PE=1 SV=3                                                                   | 0,115192161  | 2,09749  |
| Q9H9E3 | Conserved oligomeric Golgi complex subunit 4 OS=Homo sapiens OX=9606 GN=COG4 PE=1 SV=3                            | -0,328521302 | 2,096792 |
| O96007 | Molybdopterin synthase catalytic subunit OS=Homo sapiens OX=9606 GN=MOCS2 PE=1 SV=1                               | -0,441478831 | 2,094745 |
| Q9Y3A5 | Ribosome maturation protein SBDS OS=Homo sapiens OX=9606 GN=SBDS PE=1 SV=4                                        | 0,190630614  | 2,091664 |
| P05413 | Fatty acid-binding protein, heart OS=Homo sapiens OX=9606 GN=FABP3 PE=1 SV=4                                      | 0,440170766  | 2,088124 |
| P27658 | Collagen alpha-1(VIII) chain OS=Homo sapiens OX=9606 GN=COL8A1 PE=1 SV=2                                          | 1,105693099  | 2,087431 |
| Q9UBP4 | Dickkopf-related protein 3 OS=Homo sapiens OX=9606 GN=DKK3 PE=1 SV=2                                              | 0,439945451  | 2,086983 |
| Q8WVD3 | E3 ubiquitin-protein ligase RNF138 OS=Homo sapiens OX=9606 GN=RNF138 PE=1 SV=1                                    | -0,286937761 | 2,08582  |
| Q6NZ12 | Caveolae-associated protein 1 OS=Homo sapiens OX=9606 GN=CAVIN1 PE=1 SV=1                                         | 0,190151347  | 2,084796 |
| Q9H9B1 | Histone-lysine N-methyltransferase EHMT1 OS=Homo sapiens OX=9606 GN=EHMT1 PE=1 SV=4                               | -0,370402391 | 2,083523 |
| P18859 | ATP synthase-coupling factor 6, mitochondrial OS=Homo sapiens OX=9606 GN=ATP5PF PE=1 SV=1                         | -0,574027895 | 2,080921 |
| Q8IVL0 | Neuron navigator 3 OS=Homo sapiens OX=9606 GN=NAV3 PE=1 SV=3                                                      | 0,427155431  | 2,079955 |
| Q8TCF1 | AN1-type zinc finger protein 1 OS=Homo sapiens OX=9606 GN=ZFAND1 PE=1 SV=1                                        | -1,076268105 | 2,076906 |

|        |                                                                                                                   |              |          |
|--------|-------------------------------------------------------------------------------------------------------------------|--------------|----------|
| Q9P107 | GEM-interacting protein OS=Homo sapiens OX=9606 GN=GMIP PE=1 SV=2                                                 | 0,349953938  | 2,076547 |
| Q96125 | Splicing factor 45 OS=Homo sapiens OX=9606 GN=RBM17 PE=1 SV=1                                                     | 0,271662229  | 2,0761   |
| Q8IX01 | SURP and G-patch domain-containing protein 2 OS=Homo sapiens OX=9606 GN=SUGP2 PE=1 SV=2                           | 0,182966685  | 2,075909 |
| P19623 | Spermidine synthase OS=Homo sapiens OX=9606 GN=SRM PE=1 SV=1                                                      | -0,252907965 | 2,073341 |
| Q6ZKV5 | Protein O-mannosyl-transferase TMTC3 OS=Homo sapiens OX=9606 GN=TMTC3 PE=1 SV=2                                   | 0,325416575  | 2,073315 |
| Q92973 | Transportin-1 OS=Homo sapiens OX=9606 GN=TNPO1 PE=1 SV=2                                                          | 0,122506537  | 2,070869 |
| Q9P035 | Very-long-chain (3R)-3-hydroxyacyl-CoA dehydratase 3 OS=Homo sapiens OX=9606 GN=HACD3 PE=1 SV=2                   | 0,270972713  | 2,069575 |
| Q9UBS8 | E3 ubiquitin-protein ligase RNF14 OS=Homo sapiens OX=9606 GN=RNF14 PE=1 SV=1                                      | -1,712154018 | 2,069263 |
| P01112 | GTPase HRAS OS=Homo sapiens OX=9606 GN=HRAS PE=1 SV=1                                                             | 0,569915049  | 2,066698 |
| Q9P015 | 39S ribosomal protein L15, mitochondrial OS=Homo sapiens OX=9606 GN=MRPL15 PE=1 SV=1                              | -0,324523533 | 2,066567 |
| Q8N392 | Rho GTPase-activating protein 18 OS=Homo sapiens OX=9606 GN=ARHGAP18 PE=1 SV=3                                    | -0,150099672 | 2,066543 |
| P49642 | DNA primase small subunit OS=Homo sapiens OX=9606 GN=PRIM1 PE=1 SV=1                                              | -0,367474864 | 2,064742 |
| Q9UG63 | ATP-binding cassette sub-family F member 2 OS=Homo sapiens OX=9606 GN=ABCF2 PE=1 SV=2                             | 0,170939431  | 2,064395 |
| Q05397 | Focal adhesion kinase 1 OS=Homo sapiens OX=9606 GN=PTK2 PE=1 SV=2                                                 | -0,251851352 | 2,062473 |
| P24386 | #N/D                                                                                                              | -0,234173474 | 2,061704 |
| O60508 | Pre-mRNA-processing factor 17 OS=Homo sapiens OX=9606 GN=CDC40 PE=1 SV=1                                          | 0,83955549   | 2,061116 |
| P60510 | Serine/threonine-protein phosphatase 4 catalytic subunit OS=Homo sapiens OX=9606 GN=PPP4C PE=1 SV=1               | 0,323782303  | 2,060968 |
| Q9H2V7 | Protein spinster homolog 1 OS=Homo sapiens OX=9606 GN=SPNS1 PE=1 SV=1                                             | -1,27199761  | 2,06075  |
| Q6IC80 | Desumoylating isopeptidase 1 OS=Homo sapiens OX=9606 GN=DESI1 PE=1 SV=1                                           | -1,063061661 | 2,060713 |
| Q9UI15 | Transgelin-3 OS=Homo sapiens OX=9606 GN=TAGLN3 PE=1 SV=2                                                          | 0,567800892  | 2,059798 |
| Q8IZ83 | Aldehyde dehydrogenase family 16 member A1 OS=Homo sapiens OX=9606 GN=ALDH16A1 PE=1 SV=2                          | -0,236516015 | 2,05916  |
| Q92797 | Sympleskin OS=Homo sapiens OX=9606 GN=SYMPK PE=1 SV=2                                                             | -0,188357363 | 2,05915  |
| O43237 | Cytoplasmic dynein 1 light intermediate chain 2 OS=Homo sapiens OX=9606 GN=DYNC1LI2 PE=1 SV=1                     | 0,223911905  | 2,058981 |
| O60826 | Coiled-coil domain-containing protein 22 OS=Homo sapiens OX=9606 GN=CCDC22 PE=1 SV=1                              | -0,251348923 | 2,05731  |
| O14519 | Cyclin-dependent kinase 2-associated protein 1 OS=Homo sapiens OX=9606 GN=CDK2AP1 PE=1 SV=1                       | -0,433868114 | 2,056182 |
| A8CG34 | Nuclear envelope pore membrane protein POM 121C OS=Homo sapiens OX=9606 GN=POM121C PE=1 SV=3                      | -0,322820327 | 2,053704 |
| Q9NRW1 | Ras-related protein Rab-6B OS=Homo sapiens OX=9606 GN=RAB6B PE=1 SV=1                                             | 0,3651404    | 2,049768 |
| Q2TB90 | Putative hexokinase HKDC1 OS=Homo sapiens OX=9606 GN=HKDC1 PE=1 SV=3                                              | 0,667144525  | 2,046961 |
| Q9BRT3 | Migration and invasion enhancer 1 OS=Homo sapiens OX=9606 GN=MIEN1 PE=1 SV=1                                      | -0,563380112 | 2,044746 |
| Q9NWH9 | SABF-like transcription modulator OS=Homo sapiens OX=9606 GN=SLTM PE=1 SV=2                                       | -0,211921916 | 2,043666 |
| Q9YU2  | Protein TSSC4 OS=Homo sapiens OX=9606 GN=TSSC4 PE=1 SV=3                                                          | -0,561693324 | 2,038991 |
| P40121 | Macrophage-capping protein OS=Homo sapiens OX=9606 GN=CAPG PE=1 SV=2                                              | -0,186857762 | 2,037788 |
| P16278 | Beta-galactosidase OS=Homo sapiens OX=9606 GN=GLB1 PE=1 SV=2                                                      | 0,221853895  | 2,034826 |
| P36871 | Phosphoglucomutase-1 OS=Homo sapiens OX=9606 GN=PGM1 PE=1 SV=3                                                    | 0,141922067  | 2,033739 |
| Q8TCG2 | Phosphatidylinositol 4-kinase type 2-beta OS=Homo sapiens OX=9606 GN=PI4K2B PE=1 SV=1                             | -1,040731397 | 2,032952 |
| Q7Z422 | SUZ domain-containing protein 1 OS=Homo sapiens OX=9606 GN=SZR1 PE=1 SV=1                                         | 0,429202238  | 2,032495 |
| Q9P0U1 | Mitochondrial import receptor subunit TOM7 homolog OS=Homo sapiens OX=9606 GN=TOMM7 PE=1 SV=1                     | -1,040272724 | 2,032377 |
| O43566 | Regulator of G-protein signaling 14 OS=Homo sapiens OX=9606 GN=RGS14 PE=1 SV=4                                    | -0,625218093 | 2,031753 |
| Q14692 | Ribosome biogenesis protein BMS1 homolog OS=Homo sapiens OX=9606 GN=BMS1 PE=1 SV=1                                | -0,36232915  | 2,031698 |
| Q9Y3C8 | Ubiquitin-fold modifier-conjugating enzyme 1 OS=Homo sapiens OX=9606 GN=UFC1 PE=1 SV=3                            | 0,289740794  | 2,031213 |
| O60306 | RNA helicase aquarius OS=Homo sapiens OX=9606 GN=AQR PE=1 SV=4                                                    | 0,179941849  | 2,031088 |
| Q6STE5 | #N/D                                                                                                              | -0,36213059  | 2,030464 |
| Q96FC9 | ATP-dependent DNA helicase DDX11 OS=Homo sapiens OX=9606 GN=DDX11 PE=1 SV=1                                       | 0,181130206  | 2,027333 |
| O15530 | 3-phosphoinositide-dependent protein kinase 1 OS=Homo sapiens OX=9606 GN=PDPK1 PE=1 SV=1                          | 0,42800972   | 2,026436 |
| Q86Y33 | Cell division cycle protein 20 homolog B OS=Homo sapiens OX=9606 GN=CD20B PE=1 SV=3                               | -1,202495009 | 2,026333 |
| Q9HCP0 | Casein kinase I isoform gamma-1 OS=Homo sapiens OX=9606 GN=CSNK1G1 PE=1 SV=1                                      | 0,244231441  | 2,026063 |
| Q9Y2Y0 | ADP-ribosylation factor-like protein 2-binding protein OS=Homo sapiens OX=9606 GN=ARL2BP PE=1 SV=1                | -0,248185245 | 2,024865 |
| P30613 | Pyruvate kinase PKLR OS=Homo sapiens OX=9606 GN=PKLR PE=1 SV=2                                                    | 0,467845462  | 2,024819 |
| Q9NS16 | Bromodomain and WD repeat-containing protein 1 OS=Homo sapiens OX=9606 GN=BRWD1 PE=1 SV=4                         | -0,082832332 | 2,023386 |
| Q14126 | Desmoglein-2 OS=Homo sapiens OX=9606 GN=DSG2 PE=1 SV=2                                                            | 0,168325663  | 2,022953 |
| Q99611 | Selenide, water dikinase 2 OS=Homo sapiens OX=9606 GN=SEPHS2 PE=1 SV=3                                            | -0,746901709 | 2,022847 |
| P10301 | Ras-related protein R-Ras OS=Homo sapiens OX=9606 GN=RRAS PE=1 SV=1                                               | -0,265984766 | 2,022491 |
| O15085 | Rho guanine nucleotide exchange factor 11 OS=Homo sapiens OX=9606 GN=ARHGEF11 PE=1 SV=1                           | -0,399515953 | 2,021939 |
| P16435 | NADPH-cytochrome P450 reductase OS=Homo sapiens OX=9606 GN=POR PE=1 SV=2                                          | 0,158953237  | 2,020664 |
| Q06481 | Amyloid-like protein 2 OS=Homo sapiens OX=9606 GN=APLP2 PE=1 SV=2                                                 | 0,555956544  | 2,019366 |
| Q5V289 | DENN domain-containing protein 4C OS=Homo sapiens OX=9606 GN=DENND4C PE=1 SV=3                                    | 0,318201108  | 2,018859 |
| A5YKK6 | CCR4-NOT transcription complex subunit 1 OS=Homo sapiens OX=9606 GN=CNOT1 PE=1 SV=2                               | 0,124040072  | 2,018603 |
| P80217 | Interferon-induced 35 kDa protein OS=Homo sapiens OX=9606 GN=IFI35 PE=1 SV=5                                      | -0,247472515 | 2,017572 |
| Q8NBN3 | Transmembrane protein 87A OS=Homo sapiens OX=9606 GN=TMEM87A PE=1 SV=3                                            | 0,368036103  | 2,016674 |
| Q9HB07 | UPP0160 protein MYG1, mitochondrial OS=Homo sapiens OX=9606 GN=C12orf10 PE=1 SV=2                                 | -0,23257554  | 2,015771 |
| P98194 | Calcium-sporting ATPase type 2C member 1 OS=Homo sapiens OX=9606 GN=ATP2C1 PE=1 SV=3                              | 0,317704724  | 2,015118 |
| O00161 | Synaptosomal-associated protein 23 OS=Homo sapiens OX=9606 GN=SNAP23 PE=1 SV=1                                    | 0,247167637  | 2,014455 |
| Q99985 | Semaphorin-3C OS=Homo sapiens OX=9606 GN=SEMA3C PE=2 SV=2                                                         | -0,17297542  | 2,013551 |
| Q96DI7 | U5 small nuclear ribonucleoprotein 40 kDa protein OS=Homo sapiens OX=9606 GN=SNRNP40 PE=1 SV=1                    | -0,21996099  | 2,012675 |
| P04843 | Dolichyl-diphosphooligosaccharide-protein glycosyltransferase subunit 1 OS=Homo sapiens OX=9606 GN=RPN1 PE=1 SV=5 | 0,132665408  | 2,012161 |
| Q00587 | Cdc42 effector protein 1 OS=Homo sapiens OX=9606 GN=CDC42EP1 PE=1 SV=1                                            | 0,375726329  | 2,01065  |
| Q95817 | BAG family molecular chaperone regulator 3 OS=Homo sapiens OX=9606 GN=BAG3 PE=1 SV=3                              | 0,137768082  | 2,009264 |
| Q13426 | DNA repair protein XRCC4 OS=Homo sapiens OX=9606 GN=XRCC4 PE=1 SV=2                                               | -0,552544456 | 2,007657 |
| P05026 | Sodium/potassium-transporting ATPase subunit beta-1 OS=Homo sapiens OX=9606 GN=ATP1B1 PE=1 SV=1                   | 0,316669383  | 2,007318 |
| O75431 | Metaxin-2 OS=Homo sapiens OX=9606 GN=MTX2 PE=1 SV=1                                                               | -0,246425174 | 2,006866 |
| Q9NWK5 | 39S ribosomal protein L39, mitochondrial OS=Homo sapiens OX=9606 GN=MRPL39 PE=1 SV=3                              | -0,286866909 | 2,006713 |
| Q7Z3J2 | VPS35 endosomal protein sorting factor-like OS=Homo sapiens OX=9606 GN=VPS35L PE=1 SV=2                           | -0,167163676 | 2,004619 |
| E9PAV3 | Nascent polypeptide-associated complex subunit alpha, muscle-specific form OS=Homo sapiens OX=9606 GN=NACA PE=1   | -0,316232291 | 2,004026 |
| Q8TD55 | Pleckstrin homology domain-containing family O member 2 OS=Homo sapiens OX=9606 GN=PLEKH02 PE=1 SV=1              | -0,551201048 | 2,00304  |
| Q8N6R0 | eEF1A lysine and N-terminal methyltransferase OS=Homo sapiens OX=9606 GN=eEF1AKNMT PE=1 SV=1                      | -0,263598837 | 2,000045 |
| P11142 | Heat shock cognate 71 kDa protein OS=Homo sapiens OX=9606 GN=HSPA8 PE=1 SV=1                                      | -0,132049169 | 1,999706 |
| Q14157 | Ubiquitin-associated protein 2-like OS=Homo sapiens OX=9606 GN=UBAP2L PE=1 SV=2                                   | -0,153642334 | 1,99941  |
| Q15020 | Squamous cell carcinoma antigen recognized by T-cells 3 OS=Homo sapiens OX=9606 GN=SART3 PE=1 SV=1                | 0,191168517  | 1,998296 |
| P61326 | Protein mago nashi homolog OS=Homo sapiens OX=9606 GN=MAGOH PE=1 SV=1                                             | -0,285836841 | 1,997941 |
| Q15024 | Exosome complex component RRP42 OS=Homo sapiens OX=9606 GN=EXOSC7 PE=1 SV=3                                       | 0,549448522  | 1,997701 |
| Q13427 | Peptidyl-prolyl cis-trans isomerase G OS=Homo sapiens OX=9606 GN=PPIG PE=1 SV=2                                   | 0,315143288  | 1,995827 |
| P60520 | Gamma-aminobutyric acid receptor-associated protein-like 2 OS=Homo sapiens OX=9606 GN=GABARAPL2 PE=1 SV=1         | 0,356624267  | 1,995161 |
| P15880 | 40S ribosomal protein S2 OS=Homo sapiens OX=9606 GN=RP52 PE=1 SV=2                                                | -0,177408389 | 1,993779 |
| Q08123 | tRNA (cytosine(34)-C(5))-methyltransferase OS=Homo sapiens OX=9606 GN=NSUN2 PE=1 SV=2                             | -0,146094509 | 1,99366  |
| Q94967 | WD repeat-containing protein 47 OS=Homo sapiens OX=9606 GN=WDR47 PE=1 SV=1                                        | 0,370828155  | 1,993635 |
| Q9NT99 | Leucine-rich repeat-containing protein 4B OS=Homo sapiens OX=9606 GN=LRRC4B PE=2 SV=3                             | -0,339832968 | 1,992486 |
| O60739 | Eukaryotic translation initiation factor 1b OS=Homo sapiens OX=9606 GN=EIF1B PE=1 SV=2                            | 1,008806486  | 1,992409 |
| O14737 | Programmed cell death protein 5 OS=Homo sapiens OX=9606 GN=PDCD5 PE=1 SV=3                                        | 0,262410985  | 1,988889 |
| Q03013 | Glutathione S-transferase Mu 4 OS=Homo sapiens OX=9606 GN=GSTM4 PE=1 SV=3                                         | -0,42046177  | 1,988035 |
| Q9BTT0 | Acidic leucine-rich nuclear phosphoprotein 32 family member E OS=Homo sapiens OX=9606 GN=ANP32E PE=1 SV=1         | -0,314087458 | 1,987881 |
| Q965U4 | Oxysterol-binding protein-related protein 9 OS=Homo sapiens OX=9606 GN=OSBPL9 PE=1 SV=2                           | -0,217825891 | 1,987769 |

|         |                                                                                                                       |              |          |
|---------|-----------------------------------------------------------------------------------------------------------------------|--------------|----------|
| O43670  | BUB3-interacting and GLEBS motif-containing protein ZNF207 OS=Homo sapiens OX=9606 GN=ZNF207 PE=1 SV=1                | -0,420388872 | 1,987664 |
| Q6Y288  | Beta-1,3-glucosyltransferase OS=Homo sapiens OX=9606 GN=B3GLCT PE=1 SV=2                                              | -1,004046153 | 1,986276 |
| P51808  | Dynein light chain Tctex-type 3 OS=Homo sapiens OX=9606 GN=DYLNLT3 PE=1 SV=1                                          | 0,546312502  | 1,986201 |
| Q9UI30  | Multifunctional methyltransferase subunit TRM112-like protein OS=Homo sapiens OX=9606 GN=TRMT112 PE=1 SV=1            | 0,419394915  | 1,982601 |
| Q05519  | Serine/arginine-rich splicing factor 11 OS=Homo sapiens OX=9606 GN=SRSF11 PE=1 SV=1                                   | -0,283837401 | 1,980939 |
| O76024  | Wolframin OS=Homo sapiens OX=9606 GN=WFS1 PE=1 SV=2                                                                   | -0,197806194 | 1,98078  |
| Q13123  | Protein Red OS=Homo sapiens OX=9606 GN=IK PE=1 SV=3                                                                   | -0,261474527 | 1,980103 |
| P33316  | Deoxyuridine 5'-triphosphate nucleotidohydrolase, mitochondrial OS=Homo sapiens OX=9606 GN=DUT PE=1 SV=4              | -0,312959006 | 1,979393 |
| P82909  | 28S ribosomal protein S36, mitochondrial OS=Homo sapiens OX=9606 GN=MRPS36 PE=1 SV=2                                  | -0,544006191 | 1,978238 |
| Q9BT23  | LIM domain-containing protein 2 OS=Homo sapiens OX=9606 GN=LIMD2 PE=1 SV=1                                            | 0,311374753  | 1,978121 |
| P13674  | Prolyl 4-hydroxylase subunit alpha-1 OS=Homo sapiens OX=9606 GN=P4HA1 PE=1 SV=2                                       | 0,152271831  | 1,975891 |
| Q92785  | Zinc finger protein ubi-d4 OS=Homo sapiens OX=9606 GN=DPF2 PE=1 SV=2                                                  | -0,353507256 | 1,975183 |
| P05204  | Non-histone chromosomal protein HMG-17 OS=Homo sapiens OX=9606 GN=HMGN2 PE=1 SV=3                                     | -0,994557849 | 1,97398  |
| O00186  | Syntaxin-binding protein 3 OS=Homo sapiens OX=9606 GN=STXB3 PE=1 SV=2                                                 | 0,228729775  | 1,973649 |
| Q13057  | Bifunctional coenzyme A synthase OS=Homo sapiens OX=9606 GN=COASY PE=1 SV=4                                           | -0,216566785 | 1,97312  |
| O94906  | Pre-mRNA-processing factor 6 OS=Homo sapiens OX=9606 GN=PRPF6 PE=1 SV=1                                               | -0,133144371 | 1,971251 |
| O00142  | Thymidine kinase 2, mitochondrial OS=Homo sapiens OX=9606 GN=TK2 PE=1 SV=4                                            | -0,690093357 | 1,964489 |
| Q99808  | Equilibrative nucleoside transporter 1 OS=Homo sapiens OX=9606 GN=SLC29A1 PE=1 SV=3                                   | -0,415776918 | 1,964159 |
| Q00613  | Heat shock factor protein 1 OS=Homo sapiens OX=9606 GN=HSF1 PE=1 SV=1                                                 | -0,986396781 | 1,963308 |
| Q86X24  | Spermatogenesis-associated serine-rich protein 2 OS=Homo sapiens OX=9606 GN=SPATS2 PE=1 SV=1                          | 0,351488811  | 1,962251 |
| Q7L576  | Cytoplasmic FMR1-interacting protein 1 OS=Homo sapiens OX=9606 GN=CYFIP1 PE=1 SV=1                                    | -0,14111856  | 1,96168  |
| O95551  | Tyrosyl-DNA phosphodiesterase 2 OS=Homo sapiens OX=9606 GN=TDPE2 PE=1 SV=1                                            | 0,608817314  | 1,959842 |
| Q07960  | Rho GTPase-activating protein 1 OS=Homo sapiens OX=9606 GN=ARHGAP1 PE=1 SV=1                                          | -0,151309331 | 1,959431 |
| Q99460  | 26S proteasome non-ATPase regulatory subunit 1 OS=Homo sapiens OX=9606 GN=PSMD1 PE=1 SV=2                             | 0,110981677  | 1,959393 |
| Q7L1Q6  | Basic leucine zipper and W2 domain-containing protein 1 OS=Homo sapiens OX=9606 GN=BZW1 PE=1 SV=1                     | -0,144132718 | 1,958297 |
| Q99519  | Sialidase-1 OS=Homo sapiens OX=9606 GN=NEU1 PE=1 SV=1                                                                 | 0,5382211    | 1,958208 |
| P31939  | Bifunctional purine biosynthesis protein PURH OS=Homo sapiens OX=9606 GN=ATIC PE=1 SV=3                               | -0,119254814 | 1,956532 |
| P30530  | Tyrosine-protein kinase receptor UFO OS=Homo sapiens OX=9606 GN=AXL PE=1 SV=4                                         | -0,174859568 | 1,95649  |
| P40938  | Replication factor C subunit 3 OS=Homo sapiens OX=9606 GN=RFC3 PE=1 SV=2                                              | 0,280891046  | 1,955926 |
| Q9NZC9  | SWI/SNF-related matrix-associated actin-dependent regulator of chromatin subfamily A-like protein 1 OS=Homo sapiens ( | -0,537407863 | 1,955386 |
| A11070  | Acetolactate synthase-like protein OS=Homo sapiens OX=9606 GN=ILVBL PE=1 SV=2                                         | -0,21496106  | 1,954481 |
| Q8NEM2  | SHC SH2 domain-binding protein 1 OS=Homo sapiens OX=9606 GN=SHCBP1 PE=1 SV=3                                          | -0,258337769 | 1,95073  |
| P16220  | Cyclic AMP-responsive element-binding protein 1 OS=Homo sapiens OX=9606 GN=CREB1 PE=1 SV=2                            | -0,412487215 | 1,947376 |
| O9Y315  | Deoxyribose-phosphate aldolase OS=Homo sapiens OX=9606 GN=DERA PE=1 SV=2                                              | -0,349138725 | 1,947197 |
| Q9H270  | Vacuolar protein sorting-associated protein 11 homolog OS=Homo sapiens OX=9606 GN=VPS11 PE=1 SV=1                     | 0,534882071  | 1,946612 |
| Q13363  | C-terminal-binding protein 1 OS=Homo sapiens OX=9606 GN=CTBP1 PE=1 SV=2                                               | -0,257856702 | 1,946234 |
| O5W111  | SPRY domain-containing protein 7 OS=Homo sapiens OX=9606 GN=SPRYD7 PE=1 SV=2                                          | 0,257781347  | 1,945529 |
| Q96CN4  | EVIS-like protein OS=Homo sapiens OX=9606 GN=EVISL PE=1 SV=1                                                          | -0,527164681 | 1,943521 |
| Q13257  | Mitotic spindle assembly checkpoint protein MAD2A OS=Homo sapiens OX=9606 GN=MAD2L1 PE=1 SV=1                         | -0,308093723 | 1,942843 |
| O8NEZ2  | Vacuolar protein sorting-associated protein 37A OS=Homo sapiens OX=9606 GN=VPS37A PE=1 SV=1                           | 0,278493111  | 1,935618 |
| Q12768  | WASH complex subunit 5 OS=Homo sapiens OX=9606 GN=WASHC5 PE=1 SV=1                                                    | -0,149833318 | 1,934282 |
| Q96A35  | 39S ribosomal protein L24, mitochondrial OS=Homo sapiens OX=9606 GN=MRLP24 PE=1 SV=1                                  | -0,409885211 | 1,934092 |
| Q9NWWY4 | Histone PARylation factor 1 OS=Homo sapiens OX=9606 GN=HPF1 PE=1 SV=2                                                 | -0,278312778 | 1,934082 |
| Q86Y82  | Syntaxin-12 OS=Homo sapiens OX=9606 GN=STX12 PE=1 SV=1                                                                | 0,3468623    | 1,932619 |
| A6NDG6  | Glycerol-3-phosphate phosphatase OS=Homo sapiens OX=9606 GN=PGP PE=1 SV=1                                             | 0,213019317  | 1,932006 |
| Q14997  | Proteasome activator complex subunit 4 OS=Homo sapiens OX=9606 GN=PSME4 PE=1 SV=2                                     | -0,212912567 | 1,930772 |
| O15084  | Serine/threonine-protein phosphatase 6 regulatory ankyrin repeat subunit A OS=Homo sapiens OX=9606 GN=ANKRD28 P       | -0,346498622 | 1,93029  |
| Q96FX7  | tRNA (adenine(58)-N(1))-methyltransferase catalytic subunit TRMT61A OS=Homo sapiens OX=9606 GN=TRMT61A PE=1 SV=1      | -0,961109744 | 1,929874 |
| Q8NFH5  | Nucleoporin NUP35 OS=Homo sapiens OX=9606 GN=NUP35 PE=1 SV=1                                                          | 0,306312448  | 1,929481 |
| Q96BN8  | Ubiquitin thioesterase otulin OS=Homo sapiens OX=9606 GN=OTULIN PE=1 SV=3                                             | 0,34632744   | 1,929194 |
| P56385  | ATP synthase subunit e, mitochondrial OS=Homo sapiens OX=9606 GN=ATP5ME PE=1 SV=2                                     | 0,529758233  | 1,928767 |
| Q9NQL2  | Ras-related GTP-binding protein D OS=Homo sapiens OX=9606 GN=RRAGD PE=1 SV=1                                          | -0,528806743 | 1,925447 |
| Q9Y5J1  | U3 small nucleolar RNA-associated protein 18 homolog OS=Homo sapiens OX=9606 GN=UTP18 PE=1 SV=3                       | 0,866534527  | 1,924611 |
| Q567U6  | Coiled-coil domain-containing protein 93 OS=Homo sapiens OX=9606 GN=CCDC93 PE=1 SV=2                                  | 0,277123467  | 1,924019 |
| Q57SU3  | Rho GTPase-activating protein 21 OS=Homo sapiens OX=9606 GN=ARHGAP21 PE=1 SV=2                                        | 0,284455845  | 1,922459 |
| Q08AD1  | Calmodulin-regulated spectrin-associated protein 2 OS=Homo sapiens OX=9606 GN=CAMSAP2 PE=1 SV=3                       | 0,193269551  | 1,922405 |
| P49116  | Nuclear receptor subfamily 2 group C member 2 OS=Homo sapiens OX=9606 GN=NR2C2 PE=1 SV=1                              | 0,904300754  | 1,921143 |
| Q8IWE2  | Protein NXP2 OS=Homo sapiens OX=9606 GN=FAM114A1 PE=1 SV=2                                                            | 0,276598901  | 1,919584 |
| Q15645  | Pachytene checkpoint protein 2 homolog OS=Homo sapiens OX=9606 GN=TRIP13 PE=1 SV=2                                    | -0,185310879 | 1,919353 |
| Q92621  | Nuclear pore complex protein Nup205 OS=Homo sapiens OX=9606 GN=NUP205 PE=1 SV=3                                       | -0,117417892 | 1,916458 |
| Q68CQ4  | Digestive organ expansion factor homolog OS=Homo sapiens OX=9606 GN=DIEXF PE=1 SV=2                                   | 0,950240408  | 1,91528  |
| P16402  | Histone H1.3 OS=Homo sapiens OX=9606 GN=HIST1H1D PE=1 SV=2                                                            | -0,25453765  | 1,915268 |
| Q9C0C4  | Semaphorin-4C OS=Homo sapiens OX=9606 GN=SEMA4C PE=1 SV=2                                                             | -0,95003711  | 1,915006 |
| Q68D10  | Protein SPT2 homolog OS=Homo sapiens OX=9606 GN=SPTY2D1 PE=1 SV=3                                                     | 0,393498326  | 1,91472  |
| Q10570  | Cleavage and polyadenylation specificity factor subunit 1 OS=Homo sapiens OX=9606 GN=CPF1 PE=1 SV=2                   | 0,211494533  | 1,914406 |
| Q13938  | Calcyphosin OS=Homo sapiens OX=9606 GN=CAPS PE=1 SV=2                                                                 | -0,525558423 | 1,914095 |
| P68104  | Elongation factor 1-alpha 1 OS=Homo sapiens OX=9606 GN=EEF1A1 PE=1 SV=1                                               | 0,161373519  | 1,914088 |
| Q02388  | Collagen alpha-1(VII) chain OS=Homo sapiens OX=9606 GN=COL7A1 PE=1 SV=2                                               | -0,254180695 | 1,911943 |
| Q96199  | Succinate--CoA ligase [GDP-forming] subunit beta, mitochondrial OS=Homo sapiens OX=9606 GN=SUCLG2 PE=1 SV=2           | -0,161175491 | 1,911016 |
| Q92520  | Protein FAM3C OS=Homo sapiens OX=9606 GN=FAM3C PE=1 SV=1                                                              | -0,405302305 | 1,910673 |
| Q8IZ69  | tRNA (uracil-5)-methyltransferase homolog A OS=Homo sapiens OX=9606 GN=TRMT2A PE=1 SV=2                               | -0,946766104 | 1,910588 |
| Q9NP77  | RNA polymerase II subunit A C-terminal domain phosphatase SSU72 OS=Homo sapiens OX=9606 GN=SSU72 PE=1 SV=1            | 0,303720617  | 1,910059 |
| O15182  | Centrin-3 OS=Homo sapiens OX=9606 GN=CETN3 PE=1 SV=2                                                                  | -0,524401033 | 1,910045 |
| Q969U7  | Proteasome assembly chaperone 2 OS=Homo sapiens OX=9606 GN=PSMG2 PE=1 SV=1                                            | -0,3034555   | 1,908704 |
| Q9H3F6  | BTB/POZ domain-containing adapter for CUL3-mediated RhoA degradation protein 3 OS=Homo sapiens OX=9606 GN=KCT         | 0,943424778  | 1,906062 |
| P52565  | Rho GDP-dissociation inhibitor 1 OS=Homo sapiens OX=9606 GN=ARHGDI1 PE=1 SV=3                                         | -0,18431442  | 1,906021 |
| A0FGR8  | Extended synaptotagmin-2 OS=Homo sapiens OX=9606 GN=ESYT2 PE=1 SV=1                                                   | -0,184144486 | 1,90375  |
| Q9UPT8  | Zinc finger CCH domain-containing protein 4 OS=Homo sapiens OX=9606 GN=ZC3H4 PE=1 SV=3                                | -0,253241351 | 1,903202 |
| Q16658  | Fascin OS=Homo sapiens OX=9606 GN=FSCN1 PE=1 SV=3                                                                     | -0,134941011 | 1,902118 |
| Q8IXM6  | Nurim OS=Homo sapiens OX=9606 GN=NRM PE=1 SV=1                                                                        | 0,343588612  | 1,902009 |
| Q8NB14  | Golgi membrane protein 1 OS=Homo sapiens OX=9606 GN=GOLM1 PE=1 SV=1                                                   | 0,222070789  | 1,901249 |
| Q07866  | Kinesin light chain 1 OS=Homo sapiens OX=9606 GN=KLC1 PE=1 SV=2                                                       | -0,151704161 | 1,900242 |
| Q13151  | Heterogeneous nuclear ribonucleoprotein A0 OS=Homo sapiens OX=9606 GN=HNRNPA0 PE=1 SV=1                               | -0,252899582 | 1,900023 |
| Q8TED1  | Probable glutathione peroxidase 8 OS=Homo sapiens OX=9606 GN=GPX8 PE=1 SV=2                                           | 0,252735514  | 1,898497 |
| Q13084  | 39S ribosomal protein L28, mitochondrial OS=Homo sapiens OX=9606 GN=MRLP28 PE=1 SV=4                                  | -0,402766177 | 1,897702 |
| P46087  | Probable 28S rRNA (cytosine(4447)-C(5))-methyltransferase OS=Homo sapiens OX=9606 GN=NOP2 PE=1 SV=2                   | -0,209964211 | 1,896787 |
| Q9NP61  | ADP-ribosylation factor GTPase-activating protein 3 OS=Homo sapiens OX=9606 GN=ARFGAP3 PE=1 SV=1                      | 0,520118963  | 1,895032 |
| Q00973  | Beta-1,4 N-acetylgalactosaminyltransferase 1 OS=Homo sapiens OX=9606 GN=B4GALNT1 PE=1 SV=2                            | -0,519464822 | 1,892735 |
| O00625  | Pira OS=Homo sapiens OX=9606 GN=PIR PE=1 SV=1                                                                         | 0,273170724  | 1,890641 |
| P56545  | C-terminal-binding protein 2 OS=Homo sapiens OX=9606 GN=CTBP2 PE=1 SV=1                                               | -0,221050633 | 1,890219 |
| P25788  | Proteasome subunit alpha type-3 OS=Homo sapiens OX=9606 GN=PSMA3 PE=1 SV=2                                            | -0,220907001 | 1,888667 |

|        |                                                                                                            |              |          |
|--------|------------------------------------------------------------------------------------------------------------|--------------|----------|
| Q9C0B7 | Transport and Golgi organization protein 6 homolog OS=Homo sapiens OX=9606 GN=TANGO6 PE=1 SV=2             | -0,449718476 | 1,887828 |
| Q92769 | Histone deacetylase 2 OS=Homo sapiens OX=9606 GN=HDAC2 PE=1 SV=2                                           | -0,220711863 | 1,886559 |
| Q94804 | Serine/threonine-protein kinase 10 OS=Homo sapiens OX=9606 GN=STK10 PE=1 SV=1                              | -0,234518423 | 1,886089 |
| Q9H0H5 | Rac GTPase-activating protein 1 OS=Homo sapiens OX=9606 GN=RACGAP1 PE=1 SV=1                               | -0,272436902 | 1,884456 |
| A3KN83 | Protein strawberry notch homolog 1 OS=Homo sapiens OX=9606 GN=SBNO1 PE=1 SV=1                              | -0,516724955 | 1,883104 |
| P12109 | Collagen alpha-1(VI) chain OS=Homo sapiens OX=9606 GN=COL6A1 PE=1 SV=3                                     | -0,198773684 | 1,882423 |
| P62993 | Growth factor receptor-bound protein 2 OS=Homo sapiens OX=9606 GN=GRB2 PE=1 SV=1                           | 0,182463083  | 1,881326 |
| Q9Y2K3 | Myosin-15 OS=Homo sapiens OX=9606 GN=MYH15 PE=1 SV=5                                                       | 0,924553667  | 1,880265 |
| Q9UPT9 | Ubiquitin carboxyl-terminal hydrolase 22 OS=Homo sapiens OX=9606 GN=USP22 PE=1 SV=2                        | -0,922769563 | 1,877805 |
| P15008 | 26S proteasome non-ATPase regulatory subunit 6 OS=Homo sapiens OX=9606 GN=PSMD6 PE=1 SV=1                  | -0,146470677 | 1,877405 |
| Q0JRZ9 | F-BAR domain only protein 2 OS=Homo sapiens OX=9606 GN=FCHO2 PE=1 SV=2                                     | 0,271283783  | 1,874743 |
| P01137 | Transforming growth factor beta-1 proprotein OS=Homo sapiens OX=9606 GN=TGFBI PE=1 SV=2                    | -0,397875821 | 1,872671 |
| Q9Y5Z4 | Heme-binding protein 2 OS=Homo sapiens OX=9606 GN=HEBP2 PE=1 SV=1                                          | -0,298645806 | 1,872101 |
| Q02878 | 60S ribosomal protein L6 OS=Homo sapiens OX=9606 GN=RPL6 PE=1 SV=3                                         | -0,149956475 | 1,871587 |
| Q5JSH3 | WD repeat-containing protein 44 OS=Homo sapiens OX=9606 GN=WDR44 PE=1 SV=1                                 | 0,433608397  | 1,871475 |
| Q10471 | Protein-L N-acetylgalactosaminyltransferase 2 OS=Homo sapiens OX=9606 GN=GALNT2 PE=1 SV=1                  | -0,146080506 | 1,870843 |
| P22061 | Protein-L isoaspartate(D-aspartate) O-methyltransferase OS=Homo sapiens OX=9606 GN=PCMT1 PE=1 SV=4         | -0,181577539 | 1,869548 |
| Q01804 | OTU domain-containing protein 4 OS=Homo sapiens OX=9606 GN=OTUD4 PE=1 SV=4                                 | -0,270643093 | 1,869351 |
| P17535 | Transcription factor jun-D OS=Homo sapiens OX=9606 GN=JUND PE=1 SV=3                                       | 0,170254442  | 1,866673 |
| P43307 | Translocon-associated protein subunit alpha OS=Homo sapiens OX=9606 GN=SSR1 PE=1 SV=3                      | 0,336527444  | 1,866496 |
| O15056 | Synaptotagmin-2 OS=Homo sapiens OX=9606 GN=SYNJ2 PE=1 SV=3                                                 | -0,511788964 | 1,865709 |
| Q9BRT2 | Ubiquinol-cytochrome-c reductase complex assembly factor 2 OS=Homo sapiens OX=9606 GN=UQC2 PE=1 SV=1       | 0,913947085  | 1,865586 |
| Q99442 | Translocation protein SEC62 OS=Homo sapiens OX=9606 GN=SEC62 PE=1 SV=1                                     | 0,336309164  | 1,865101 |
| Q966P6 | Scavenger receptor class F member 2 OS=Homo sapiens OX=9606 GN=SCARF2 PE=1 SV=5                            | -0,396384384 | 1,865032 |
| Q8IYU8 | Calcium uptake protein 2, mitochondrial OS=Homo sapiens OX=9606 GN=MICU2 PE=1 SV=2                         | -0,511583177 | 1,864984 |
| Q99436 | Proteasome subunit beta type-7 OS=Homo sapiens OX=9606 GN=PSMB7 PE=1 SV=1                                  | -0,218362331 | 1,86123  |
| Q9Y4A5 | Transformation/transcription domain-associated protein OS=Homo sapiens OX=9606 GN=TRRAP PE=1 SV=3          | -0,196704351 | 1,857392 |
| Q8TDB6 | E3 ubiquitin-protein ligase DTX3L OS=Homo sapiens OX=9606 GN=DTX3L PE=1 SV=1                               | -0,231633164 | 1,857089 |
| Q9UBV2 | Protein sel-1 homolog 1 OS=Homo sapiens OX=9606 GN=SEL1L PE=1 SV=3                                         | 0,33504239   | 1,857004 |
| Q00169 | Phosphatidylinositol transfer protein alpha isoform OS=Homo sapiens OX=9606 GN=PITPNA PE=1 SV=2            | -0,231431005 | 1,855061 |
| Q12882 | Dihydropyrimidine dehydrogenase [NADP(+)] OS=Homo sapiens OX=9606 GN=DPYD PE=1 SV=2                        | -0,508310877 | 1,853419 |
| Q13576 | Ras GTPase-activating-like protein IQGAP2 OS=Homo sapiens OX=9606 GN=IQGAP2 PE=1 SV=4                      | -0,393510072 | 1,850303 |
| O00330 | Pyruvate dehydrogenase protein X component, mitochondrial OS=Homo sapiens OX=9606 GN=PDHX PE=1 SV=3        | -0,506982392 | 1,848718 |
| O15334 | Lethal(2) giant larvae protein homolog 1 OS=Homo sapiens OX=9606 GN=LLGL1 PE=1 SV=3                        | -0,247329095 | 1,848374 |
| Q99575 | Ribonucleases P/MRP protein subunit POP1 OS=Homo sapiens OX=9606 GN=POP1 PE=1 SV=2                         | -0,247156788 | 1,846781 |
| Q9BYW2 | Histone-lysine N-methyltransferase SETD2 OS=Homo sapiens OX=9606 GN=SETD2 PE=1 SV=3                        | -0,310174041 | 1,84558  |
| Q9Y3B9 | RRP15-like protein OS=Homo sapiens OX=9606 GN=RRP15 PE=1 SV=2                                              | -0,899428705 | 1,845279 |
| O43639 | Cytoplasmic protein NCK2 OS=Homo sapiens OX=9606 GN=NCK2 PE=1 SV=2                                         | 0,343465927  | 1,844487 |
| O15379 | Histone deacetylase 3 OS=Homo sapiens OX=9606 GN=HDAC3 PE=1 SV=2                                           | 1,230408478  | 1,842139 |
| Q6NSJ5 | Volume-regulated anion channel subunit LRRC8E OS=Homo sapiens OX=9606 GN=LRRC8E PE=1 SV=2                  | 0,332336328  | 1,839715 |
| Q724Q2 | HEAT repeat-containing protein 3 OS=Homo sapiens OX=9606 GN=HEATR3 PE=1 SV=2                               | -0,246278174 | 1,838664 |
| Q96K17 | Transcription factor BTF3 homolog 4 OS=Homo sapiens OX=9606 GN=BTF3L4 PE=1 SV=1                            | -0,294138696 | 1,838471 |
| Q8NCA5 | Protein FAM98A OS=Homo sapiens OX=9606 GN=FAM98A PE=1 SV=2                                                 | -0,216203311 | 1,838033 |
| Q96EL3 | 39S ribosomal protein L53, mitochondrial OS=Homo sapiens OX=9606 GN=MRPL53 PE=1 SV=1                       | -0,893159302 | 1,836432 |
| Q9Y2H0 | Disks large-associated protein 4 OS=Homo sapiens OX=9606 GN=DLGAP4 PE=1 SV=3                               | -0,194949558 | 1,83624  |
| Q99584 | Protein S100-A13 OS=Homo sapiens OX=9606 GN=S100A13 PE=1 SV=1                                              | -0,502886746 | 1,834198 |
| Q9C0E8 | Endoplasmic reticulum junction formation protein lunapark OS=Homo sapiens OX=9606 GN=LNPK PE=1 SV=2        | -0,266351445 | 1,8333   |
| Q9UKV8 | Protein argonaute-2 OS=Homo sapiens OX=9606 GN=AGO2 PE=1 SV=3                                              | 0,389921743  | 1,831904 |
| Q9BZL1 | Ubiquitin-like protein 5 OS=Homo sapiens OX=9606 GN=UBL5 PE=1 SV=1                                         | -0,330928851 | 1,830726 |
| Q9NVV2 | Integrator complex subunit 10 OS=Homo sapiens OX=9606 GN=INTS10 PE=1 SV=2                                  | 0,888361076  | 1,82963  |
| Q01433 | AMP deaminase 2 OS=Homo sapiens OX=9606 GN=AMPD2 PE=1 SV=2                                                 | 0,194361068  | 1,829162 |
| Q9ULT8 | E3 ubiquitin-protein ligase HECTD1 OS=Homo sapiens OX=9606 GN=HECTD1 PE=1 SV=3                             | 0,123333255  | 1,826579 |
| Q15678 | Tyrosine-protein phosphatase non-receptor type 14 OS=Homo sapiens OX=9606 GN=PTPN14 PE=1 SV=2              | -0,20361589  | 1,824171 |
| P53396 | ATP-citrate synthase OS=Homo sapiens OX=9606 GN=ACLY PE=1 SV=3                                             | -0,092305102 | 1,823897 |
| O15523 | ATP-dependent RNA helicase DDX3Y OS=Homo sapiens OX=9606 GN=DDX3Y PE=1 SV=2                                | 0,388234342  | 1,823247 |
| Q8NFF3 | Nucleoporin Nup43 OS=Homo sapiens OX=9606 GN=NUP43 PE=1 SV=1                                               | 0,388122159  | 1,822672 |
| P62269 | 40S ribosomal protein S18 OS=Homo sapiens OX=9606 GN=RPS18 PE=1 SV=3                                       | -0,214678137 | 1,821691 |
| P15374 | Ubiquitin carboxyl-terminal hydrolase isozyme L3 OS=Homo sapiens OX=9606 GN=UCHL3 PE=1 SV=1                | -0,387744674 | 1,820735 |
| Q9P2R7 | Succinate-CoA ligase [ADP-forming] subunit beta, mitochondrial OS=Homo sapiens OX=9606 GN=SUCLA2 PE=1 SV=3 | 0,203254814  | 1,820064 |
| A6NDU8 | UPF0600 protein C5orf51 OS=Homo sapiens OX=9606 GN=C5orf51 PE=1 SV=1                                       | -0,264583232 | 1,818484 |
| P32780 | General transcription factor IIH subunit 1 OS=Homo sapiens OX=9606 GN=GTF2H1 PE=1 SV=1                     | -0,498384366 | 1,818194 |
| P11233 | Ras-related protein Raf-A OS=Homo sapiens OX=9606 GN=RALA PE=1 SV=1                                        | -0,243998226 | 1,817636 |
| Q9NXH8 | Torsin-4A OS=Homo sapiens OX=9606 GN=TOR4A PE=1 SV=2                                                       | -0,227656489 | 1,817294 |
| P35611 | Alpha-adducin OS=Homo sapiens OX=9606 GN=ADD1 PE=1 SV=2                                                    | -0,127699011 | 1,817224 |
| P09525 | Annexin A4 OS=Homo sapiens OX=9606 GN=ANXA4 PE=1 SV=4                                                      | -0,133105435 | 1,81611  |
| Q5VSL9 | Striatin-interacting protein 1 OS=Homo sapiens OX=9606 GN=STRIP1 PE=1 SV=1                                 | -0,328551517 | 1,815549 |
| Q96CW1 | AP-2 complex subunit mu OS=Homo sapiens OX=9606 GN=AP2M1 PE=1 SV=2                                         | -0,13908314  | 1,811705 |
| Q14139 | Ubiquitin conjugation factor E4 A OS=Homo sapiens OX=9606 GN=UBE4A PE=1 SV=2                               | -0,496317492 | 1,810832 |
| O76080 | AN1-type zinc finger protein 5 OS=Homo sapiens OX=9606 GN=ZFAND5 PE=1 SV=1                                 | -0,495758641 | 1,80884  |
| Q15345 | Leucine-rich repeat-containing protein 41 OS=Homo sapiens OX=9606 GN=LRRC41 PE=1 SV=3                      | 0,385403714  | 1,80872  |
| P82930 | 28S ribosomal protein S34, mitochondrial OS=Homo sapiens OX=9606 GN=MRPS34 PE=1 SV=2                       | -0,494025073 | 1,802656 |
| Q8IYB7 | DIS3-like exonuclease 2 OS=Homo sapiens OX=9606 GN=DIS3L2 PE=1 SV=4                                        | 0,493530104  | 1,800889 |
| P16383 | GC-rich sequence DNA-binding factor 2 OS=Homo sapiens OX=9606 GN=GCFC2 PE=1 SV=2                           | -0,867941653 | 1,800365 |
| Q15366 | Poly(rC)-binding protein 2 OS=Homo sapiens OX=9606 GN=PBCP2 PE=1 SV=1                                      | -0,192192336 | 1,799927 |
| P41440 | Folate transporter 1 OS=Homo sapiens OX=9606 GN=SLC19A1 PE=1 SV=3                                          | -0,867576827 | 1,799837 |
| Q15382 | GTP-binding protein Rheb OS=Homo sapiens OX=9606 GN=RHEB PE=1 SV=1                                         | -0,225818553 | 1,798972 |
| Q9HD26 | Golgi-associated PDZ and coiled-coil motif-containing protein OS=Homo sapiens OX=9606 GN=GOPC PE=1 SV=1    | 0,288799357  | 1,798735 |
| Q727G8 | Vacuolar protein sorting-associated protein 13B OS=Homo sapiens OX=9606 GN=VPS13B PE=1 SV=2                | 0,400235012  | 1,798472 |
| Q8NF37 | Lysophosphatidylcholine acyltransferase 1 OS=Homo sapiens OX=9606 GN=LPCAT1 PE=1 SV=2                      | 0,3257974    | 1,797977 |
| P09936 | Ubiquitin carboxyl-terminal hydrolase isozyme L1 OS=Homo sapiens OX=9606 GN=UCHL1 PE=1 SV=2                | 0,176050707  | 1,796556 |
| Q12996 | Cleavage stimulation factor subunit 3 OS=Homo sapiens OX=9606 GN=CSTF3 PE=1 SV=1                           | -0,241695358 | 1,796449 |
| Q8NSC6 | S1 RNA-binding domain-containing protein 1 OS=Homo sapiens OX=9606 GN=SRBD1 PE=1 SV=2                      | -0,382990939 | 1,796332 |
| P14678 | Small nuclear ribonucleoprotein-associated proteins B and B' OS=Homo sapiens OX=9606 GN=SNRPB PE=1 SV=2    | -0,225498903 | 1,79579  |
| Q8NH49 | Atlantin-2 OS=Homo sapiens OX=9606 GN=ATL2 PE=1 SV=2                                                       | -0,325382092 | 1,795328 |
| Q96EB1 | Elongator complex protein 4 OS=Homo sapiens OX=9606 GN=ELP4 PE=1 SV=2                                      | -0,864171825 | 1,794905 |
| P62258 | 14-3-3 protein epsilon OS=Homo sapiens OX=9606 GN=YWHAE PE=1 SV=1                                          | -0,141510082 | 1,794567 |
| O43286 | Beta-1,4-galactosyltransferase 5 OS=Homo sapiens OX=9606 GN=B4GALT5 PE=1 SV=1                              | -0,268616635 | 1,793714 |
| Q96EK6 | Glucosamine 6-phosphate N-acetyltransferase OS=Homo sapiens OX=9606 GN=GPNPAT1 PE=1 SV=1                   | -0,491013018 | 1,791895 |
| Q9Y5Q0 | Fatty acid desaturase 3 OS=Homo sapiens OX=9606 GN=FADS3 PE=1 SV=1                                         | 0,381860134  | 1,790254 |
| O75663 | TIP41-like protein OS=Homo sapiens OX=9606 GN=TIPRL PE=1 SV=2                                              | 0,200637311  | 1,79037  |
| Q13158 | FAS-associated death domain protein OS=Homo sapiens OX=9606 GN=FADD PE=1 SV=1                              | -0,3245048   | 1,789733 |

|         |                                                                                                                 |              |          |
|---------|-----------------------------------------------------------------------------------------------------------------|--------------|----------|
| Q14344  | Guanine nucleotide-binding protein subunit alpha-13 OS=Homo sapiens OX=9606 GN=GNA13 PE=1 SV=2                  | 0,224889983  | 1,789733 |
| Q96HS1  | Serine/threonine-protein phosphatase PGAM5, mitochondrial OS=Homo sapiens OX=9606 GN=PGAM5 PE=1 SV=2            | 0,260804502  | 1,786894 |
| Q96RT1  | Erbin OS=Homo sapiens OX=9606 GN=ERBIN PE=1 SV=2                                                                | -0,144707803 | 1,786421 |
| Q9NRW7  | Vacuolar protein sorting-associated protein 45 OS=Homo sapiens OX=9606 GN=VPS45 PE=1 SV=1                       | -0,153049068 | 1,78638  |
| P82675  | 28S ribosomal protein S5, mitochondrial OS=Homo sapiens OX=9606 GN=MRPS5 PE=1 SV=2                              | -0,48945617  | 1,786325 |
| Q4L180  | Filamin A-interacting protein 1-like OS=Homo sapiens OX=9606 GN=FILIP1L PE=1 SV=2                               | 0,323925547  | 1,78604  |
| P07196  | Neurofilament light polypeptide OS=Homo sapiens OX=9606 GN=NEFL PE=1 SV=3                                       | -0,152872007 | 1,783696 |
| Q8WWW12 | PEST proteolytic signal-containing nuclear protein OS=Homo sapiens OX=9606 GN=PCNP PE=1 SV=2                    | -0,240270845 | 1,78337  |
| Q86W50  | RNA N6-adenosine-methyltransferase METTL16 OS=Homo sapiens OX=9606 GN=METTL16 PE=1 SV=2                         | -0,380250885 | 1,782257 |
| P50213  | Isocitrate dehydrogenase [NAD] subunit alpha, mitochondrial OS=Homo sapiens OX=9606 GN=IDH3A PE=1 SV=1          | -0,199587803 | 1,778501 |
| Q96F07  | Cytoplasmic FMR1-interacting protein 2 OS=Homo sapiens OX=9606 GN=CFYFIP2 PE=1 SV=2                             | -0,162402748 | 1,777471 |
| Q9HCU5  | Proactin regulatory element-binding protein OS=Homo sapiens OX=9606 GN=PREB PE=1 SV=2                           | -0,259656899 | 1,777321 |
| Q98Q52  | Zinc phosphodiesterase ELAC protein 2 OS=Homo sapiens OX=9606 GN=ELAC2 PE=1 SV=2                                | -0,137053946 | 1,777199 |
| Q969N2  | GPI transamidase component PIG-T OS=Homo sapiens OX=9606 GN=PIGT PE=1 SV=1                                      | 0,322175449  | 1,774884 |
| P78314  | SH3 domain-binding protein 2 OS=Homo sapiens OX=9606 GN=SH3BP2 PE=1 SV=2                                        | 1,828897807  | 1,774581 |
| Q9UKI8  | Serine/threonine-protein kinase tousled-like 1 OS=Homo sapiens OX=9606 GN=TLK1 PE=1 SV=2                        | -0,718602132 | 1,773347 |
| Q8N335  | Glycerol-3-phosphate dehydrogenase 1-like protein OS=Homo sapiens OX=9606 GN=GPD1L PE=1 SV=1                    | 0,378099661  | 1,771203 |
| Q92733  | Proline-rich protein PRCC OS=Homo sapiens OX=9606 GN=PRCC PE=1 SV=1                                             | 0,485060165  | 1,77057  |
| P40926  | Malate dehydrogenase, mitochondrial OS=Homo sapiens OX=9606 GN=MDH2 PE=1 SV=3                                   | 0,156720994  | 1,770518 |
| O43181  | NADH dehydrogenase [ubiquinone] iron-sulfur protein 4, mitochondrial OS=Homo sapiens OX=9606 GN=NDUFS4 PE=1 SV  | -0,377738968 | 1,76935  |
| Q9Y2G3  | Probable phospholipid-transporting ATPase IF OS=Homo sapiens OX=9606 GN=ATP11B PE=1 SV=2                        | 0,132380264  | 1,768807 |
| Q86W42  | THO complex subunit 6 homolog OS=Homo sapiens OX=9606 GN=THOC6 PE=1 SV=1                                        | 0,845663161  | 1,767841 |
| Q8TDX7  | Serine/threonine-protein kinase Nek7 OS=Homo sapiens OX=9606 GN=NEK7 PE=1 SV=1                                  | -0,161629736 | 1,766543 |
| P20290  | Transcription factor BTF3 OS=Homo sapiens OX=9606 GN=BTF3 PE=1 SV=1                                             | 0,222346413  | 1,764482 |
| Q9P013  | Spliceosome-associated protein CWC15 homolog OS=Homo sapiens OX=9606 GN=CWC15 PE=1 SV=2                         | -0,843233025 | 1,764255 |
| P48454  | Serine/threonine-protein phosphatase 2B catalytic subunit gamma isoform OS=Homo sapiens OX=9606 GN=PPP3CC PE=1  | 0,933264771  | 1,763988 |
| Q13601  | KRR1 small subunit processome component homolog OS=Homo sapiens OX=9606 GN=KRR1 PE=1 SV=4                       | -0,37653886  | 1,763181 |
| Q9ULS6  | Potassium voltage-gated channel subfamily S member 2 OS=Homo sapiens OX=9606 GN=KCNK2 PE=1 SV=2                 | 0,842312855  | 1,762895 |
| O43805  | Sjogren syndrome nuclear autoantigen 1 OS=Homo sapiens OX=9606 GN=SSNA1 PE=1 SV=2                               | -0,320231134 | 1,762497 |
| Q8WXI9  | Transcriptional repressor p66-beta OS=Homo sapiens OX=9606 GN=GATAD2B PE=1 SV=1                                 | -0,198143707 | 1,762206 |
| O14733  | Dual specificity mitogen-activated protein kinase kinase 7 OS=Homo sapiens OX=9606 GN=MAP2K7 PE=1 SV=2          | 0,405147763  | 1,762019 |
| P16989  | Y-box-binding protein 3 OS=Homo sapiens OX=9606 GN=YBX3 PE=1 SV=4                                               | -0,188695934 | 1,76143  |
| P11277  | Spectrin beta chain, erythrocytic OS=Homo sapiens OX=9606 GN=SPTB PE=1 SV=5                                     | 0,283714618  | 1,761006 |
| Q9UGR2  | Zinc finger CCHC domain-containing protein 7B OS=Homo sapiens OX=9606 GN=ZC3H7B PE=1 SV=2                       | -0,283714245 | 1,761003 |
| Q9NZN8  | CCR4-NOT transcription complex subunit 2 OS=Homo sapiens OX=9606 GN=CNOT2 PE=1 SV=1                             | -0,482076554 | 1,759852 |
| Q8IY18  | Structural maintenance of chromosomes protein 5 OS=Homo sapiens OX=9606 GN=SMC5 PE=1 SV=2                       | 0,838315041  | 1,756974 |
| Q93050  | V-type proton ATPase 116 kDa subunit a isoform 1 OS=Homo sapiens OX=9606 GN=ATP6V0A1 PE=1 SV=3                  | -0,481069215 | 1,75623  |
| Q9BX68  | Histidine triad nucleotide-binding protein 2, mitochondrial OS=Homo sapiens OX=9606 GN=HINT2 PE=1 SV=1          | -0,318894173 | 1,753982 |
| P49006  | MARCKS-related protein OS=Homo sapiens OX=9606 GN=MARCKS1L PE=1 SV=2                                            | -0,374682429 | 1,753637 |
| Q9H054  | Probable ATP-dependent RNA helicase DDX47 OS=Homo sapiens OX=9606 GN=DDX47 PE=1 SV=1                            | 0,221125608  | 1,752394 |
| Q8N5V2  | Ephexin-1 OS=Homo sapiens OX=9606 GN=NGEF PE=1 SV=2                                                             | -0,221083653 | 1,751979 |
| Q9BWS9  | Chitinase domain-containing protein 1 OS=Homo sapiens OX=9606 GN=CHID1 PE=1 SV=1                                | 0,374336947  | 1,751861 |
| Q9Y2Q9  | 28S ribosomal protein S28, mitochondrial OS=Homo sapiens OX=9606 GN=MRPS28 PE=1 SV=1                            | -0,479738835 | 1,751442 |
| Q8TDD1  | ATP-dependent RNA helicase DDX54 OS=Homo sapiens OX=9606 GN=DDX54 PE=1 SV=2                                     | -0,282184944 | 1,749678 |
| P11234  | Ras-related protein Ral-B OS=Homo sapiens OX=9606 GN=RALB PE=1 SV=1                                             | 0,318051105  | 1,748614 |
| P49821  | NADH dehydrogenase [ubiquinone] flavoprotein 1, mitochondrial OS=Homo sapiens OX=9606 GN=NDUFB1 PE=1 SV=4       | -0,207717353 | 1,747593 |
| P53621  | Coatomer subunit alpha OS=Homo sapiens OX=9606 GN=COPA PE=1 SV=2                                                | -0,083460243 | 1,746703 |
| Q9H9Q2  | COP9 signalosome complex subunit 7b OS=Homo sapiens OX=9606 GN=COP57B PE=1 SV=1                                 | -0,281663039 | 1,745815 |
| Q5TCZ1  | SH3 and PX domain-containing protein 2A OS=Homo sapiens OX=9606 GN=SH3PXD2A PE=1 SV=1                           | -0,830774214 | 1,745749 |
| O15427  | Monocarboxylate transporter 4 OS=Homo sapiens OX=9606 GN=SLC16A3 PE=1 SV=1                                      | -0,281128994 | 1,741864 |
| Q15043  | Zinc transporter ZIP14 OS=Homo sapiens OX=9606 GN=SLC39A14 PE=1 SV=3                                            | 0,372253459  | 1,741146 |
| Q5T200  | Zinc finger CCHC domain-containing protein 13 OS=Homo sapiens OX=9606 GN=ZC3H13 PE=1 SV=1                       | -0,371978799 | 1,739733 |
| Q07954  | Prolow-density lipoprotein receptor-related protein 1 OS=Homo sapiens OX=9606 GN=LRP1 PE=1 SV=2                 | -0,064647953 | 1,738769 |
| O15231  | Zinc finger protein 185 OS=Homo sapiens OX=9606 GN=ZNF185 PE=1 SV=3                                             | 0,316265221  | 1,737248 |
| Q9NS87  | Kinesin-like protein KIF15 OS=Homo sapiens OX=9606 GN=KIF15 PE=1 SV=1                                           | -0,475365724 | 1,735671 |
| Q9P258  | Protein RCC2 OS=Homo sapiens OX=9606 GN=RCC2 PE=1 SV=2                                                          | 0,149608718  | 1,734456 |
| Q86US8  | Telomerase-binding protein EST1A OS=Homo sapiens OX=9606 GN=SMG6 PE=1 SV=2                                      | 0,823002062  | 1,734101 |
| Q14137  | Ribosome biogenesis protein BOP1 OS=Homo sapiens OX=9606 GN=BOP1 PE=1 SV=2                                      | -0,370853992 | 1,733947 |
| Q9BV14  | Nucleolar complex protein 4 homolog OS=Homo sapiens OX=9606 GN=NOC4L PE=1 SV=1                                  | -0,219130774 | 1,732685 |
| O75787  | Renin receptor OS=Homo sapiens OX=9606 GN=ATP6AP2 PE=1 SV=2                                                     | 0,254828323  | 1,732614 |
| Q9HOR4  | Haloacid dehalogenase-like hydrolase domain-containing protein 2 OS=Homo sapiens OX=9606 GN=HDHD2 PE=1 SV=1     | -0,821667196 | 1,732093 |
| Q9H1E3  | Nuclear ubiquitously casein and cyclin-dependent kinase substrate 1 OS=Homo sapiens OX=9606 GN=NUCKS1 PE=1 SV=1 | -0,473954668 | 1,730582 |
| P46976  | Glycogenin-1 OS=Homo sapiens OX=9606 GN=GYG1 PE=1 SV=4                                                          | 0,253872736  | 1,729215 |
| Q01831  | DNA repair protein complementing XP-C cells OS=Homo sapiens OX=9606 GN=XPC PE=1 SV=4                            | -0,473262504 | 1,728081 |
| Q99523  | Soritin OS=Homo sapiens OX=9606 GN=SORT1 PE=1 SV=3                                                              | -0,314675012 | 1,727135 |
| Q965T3  | Paired amphipathic helix protein Sin3a OS=Homo sapiens OX=9606 GN=SIN3A PE=1 SV=2                               | -0,253353242 | 1,724907 |
| P49770  | Translation initiation factor eIF-2B subunit beta OS=Homo sapiens OX=9606 GN=EIF2B2 PE=1 SV=3                   | 0,314320927  | 1,72488  |
| Q8NBK3  | Formylglycine-generating enzyme OS=Homo sapiens OX=9606 GN=SUMF1 PE=1 SV=3                                      | -0,749551479 | 1,722226 |
| Q9HCM4  | Band 4.1-like protein 5 OS=Homo sapiens OX=9606 GN=EPB41L5 PE=1 SV=3                                            | 0,471490588  | 1,721673 |
| Q5T310  | G patch domain-containing protein 4 OS=Homo sapiens OX=9606 GN=GPATCH4 PE=1 SV=2                                | -0,814705099 | 1,721578 |
| Q9Y639  | Neuroplastin OS=Homo sapiens OX=9606 GN=NPTN PE=1 SV=2                                                          | 0,313658178  | 1,720666 |
| Q6VNO2  | Ran-binding protein 10 OS=Homo sapiens OX=9606 GN=RANBP10 PE=1 SV=1                                             | 0,36818081   | 1,720194 |
| Q9UBJ2  | ATP-binding cassette sub-family D member 2 OS=Homo sapiens OX=9606 GN=ABCD2 PE=1 SV=1                           | 1,230379434  | 1,719559 |
| Q8N5K1  | CDGSH iron-sulfur domain-containing protein 2 OS=Homo sapiens OX=9606 GN=CISD2 PE=1 SV=1                        | 0,470894848  | 1,719518 |
| Q5JSL3  | Dedicator of cytokinesis protein 11 OS=Homo sapiens OX=9606 GN=DOCK11 PE=1 SV=2                                 | 0,888463548  | 1,718862 |
| Q9HC35  | Echinoderm microtubule-associated protein-like 4 OS=Homo sapiens OX=9606 GN=EML4 PE=1 SV=3                      | -0,194232482 | 1,718281 |
| Q8N163  | Cell cycle and apoptosis regulator protein 2 OS=Homo sapiens OX=9606 GN=CCAR2 PE=1 SV=2                         | -0,124889594 | 1,718157 |
| Q9UBU9  | Nuclear RNA export factor 1 OS=Homo sapiens OX=9606 GN=NXF1 PE=1 SV=1                                           | 0,20469036   | 1,715623 |
| O43294  | Transforming growth factor beta-1-induced transcript 1 protein OS=Homo sapiens OX=9606 GN=TGFBI1 PE=1 SV=2      | -0,277342495 | 1,713886 |
| O43752  | Syntaxin-6 OS=Homo sapiens OX=9606 GN=STX6 PE=1 SV=1                                                            | 0,36690636   | 1,713635 |
| O60488  | Long-chain-fatty-acid--CoA ligase 4 OS=Homo sapiens OX=9606 GN=ACSL4 PE=1 SV=2                                  | 0,157819515  | 1,712998 |
| P14543  | Nidogen-1 OS=Homo sapiens OX=9606 GN=NID1 PE=1 SV=3                                                             | 0,808257969  | 1,711784 |
| Q8WUI4  | Histone deacetylase 7 OS=Homo sapiens OX=9606 GN=HDAC7 PE=1 SV=2                                                | -0,312242453 | 1,711666 |
| P78406  | mRNA export factor OS=Homo sapiens OX=9606 GN=RAE1 PE=1 SV=1                                                    | -0,193499716 | 1,710086 |
| O94903  | Pyridoxal phosphate homeostasis protein OS=Homo sapiens OX=9606 GN=PLPBP PE=1 SV=1                              | 0,366187752  | 1,709937 |
| Q99829  | Copine-1 OS=Homo sapiens OX=9606 GN=CPNE1 PE=1 SV=1                                                             | 0,157532978  | 1,708993 |
| Q96IH8  | Ras-associating and dilute domain-containing protein OS=Homo sapiens OX=9606 GN=RADIL PE=1 SV=5                 | 0,522098811  | 1,708799 |
| O43615  | Mitochondrial import inner membrane translocase subunit TIM44 OS=Homo sapiens OX=9606 GN=TIMM44 PE=1 SV=2       | 0,184137691  | 1,70747  |
| Q9UGL1  | #N/D                                                                                                            | -0,678356373 | 1,706712 |
| P08708  | 40S ribosomal protein S17 OS=Homo sapiens OX=9606 GN=RP517 PE=1 SV=2                                            | -0,231843355 | 1,706429 |
| Q9BZE1  | 39S ribosomal protein L37, mitochondrial OS=Homo sapiens OX=9606 GN=MRPL37 PE=1 SV=2                            | -0,216319673 | 1,705005 |

|        |                                                                                                                 |              |          |
|--------|-----------------------------------------------------------------------------------------------------------------|--------------|----------|
| P05114 | Non-histone chromosomal protein HMG-14 OS=Homo sapiens OX=9606 GN=HMGN1 PE=1 SV=3                               | -0,250853408 | 1,704204 |
| Q86SF2 | N-acetylgalactosaminyltransferase 7 OS=Homo sapiens OX=9606 GN=GALNT7 PE=1 SV=1                                 | -0,25078721  | 1,703657 |
| Q9H7L9 | Sin3 histone deacetylase corepressor complex component SDS3 OS=Homo sapiens OX=9606 GN=SUDS3 PE=1 SV=2          | 0,135730322  | 1,703017 |
| Q9UN51 | Protein timeless homolog OS=Homo sapiens OX=9606 GN=TIMELESS PE=1 SV=2                                          | -0,466310178 | 1,702904 |
| O14879 | Interferon-induced protein with tetratricopeptide repeats 3 OS=Homo sapiens OX=9606 GN=IFIT3 PE=1 SV=1          | 0,425364853  | 1,700921 |
| Q9NZL4 | Hsp70-binding protein 1 OS=Homo sapiens OX=9606 GN=HSPBP1 PE=1 SV=2                                             | 0,156869572  | 1,699731 |
| Q7LSY9 | E3 ubiquitin-protein transferase MAEA OS=Homo sapiens OX=9606 GN=MAEA PE=1 SV=1                                 | -0,364007081 | 1,698712 |
| Q96PD2 | Discoidin, CUB and LCCL domain-containing protein 2 OS=Homo sapiens OX=9606 GN=DCBLD2 PE=1 SV=1                 | -0,151771153 | 1,698559 |
| Q9H0P0 | Cytosolic 5'-nucleotidase 3A OS=Homo sapiens OX=9606 GN=NT5C3A PE=1 SV=3                                        | 0,465103673  | 1,698524 |
| P14314 | Glucosidase 2 subunit beta OS=Homo sapiens OX=9606 GN=PRKCSH PE=1 SV=2                                          | -0,142982145 | 1,697689 |
| P42574 | Caspase-3 OS=Homo sapiens OX=9606 GN=CASP3 PE=1 SV=2                                                            | -0,275090696 | 1,697279 |
| Q13506 | NGFI-A-binding protein 1 OS=Homo sapiens OX=9606 GN=NAB1 PE=1 SV=2                                              | 0,798697359  | 1,697155 |
| Q9UBC2 | Epidermal growth factor receptor substrate 15-like 1 OS=Homo sapiens OX=9606 GN=EPS15L1 PE=1 SV=1               | -0,126294274 | 1,6955   |
| P0DP25 | Calmodulin-3 OS=Homo sapiens OX=9606 GN=CALM3 PE=1 SV=1                                                         | -0,182843131 | 1,692233 |
| Q93100 | Phosphorylase b kinase regulatory subunit beta OS=Homo sapiens OX=9606 GN=PHKB PE=1 SV=3                        | -0,462544796 | 1,689226 |
| Q9UI09 | NADH dehydrogenase [ubiquinone] 1 alpha subcomplex subunit 12 OS=Homo sapiens OX=9606 GN=NDUFA12 PE=1 SV=1      | -0,792611768 | 1,687777 |
| Q93074 | Mediator of RNA polymerase II transcription subunit 12 OS=Homo sapiens OX=9606 GN=MED12 PE=1 SV=4               | -0,461955156 | 1,687081 |
| Q9Y6A4 | Cilia- and flagella-associated protein 20 OS=Homo sapiens OX=9606 GN=CFAP20 PE=1 SV=1                           | -0,361547488 | 1,686049 |
| Q9Y4E8 | Ubiquitin carboxyl-terminal hydrolase 15 OS=Homo sapiens OX=9606 GN=USP15 PE=1 SV=3                             | 0,201497119  | 1,682067 |
| Q9NR46 | Endophilin-B2 OS=Homo sapiens OX=9606 GN=SH3GLB2 PE=1 SV=1                                                      | -0,173779928 | 1,677628 |
| Q9BQE5 | Apolipoprotein L2 OS=Homo sapiens OX=9606 GN=APOL2 PE=1 SV=1                                                    | -0,228664826 | 1,677606 |
| Q9HAS0 | Protein Njmu-R1 OS=Homo sapiens OX=9606 GN=C17orf75 PE=1 SV=2                                                   | -0,306847114 | 1,677404 |
| P32969 | 60S ribosomal protein L9 OS=Homo sapiens OX=9606 GN=RPL9 PE=1 SV=1                                              | -0,213445188 | 1,676814 |
| P19367 | Hexokinase-1 OS=Homo sapiens OX=9606 GN=HK1 PE=1 SV=3                                                           | -0,092600976 | 1,676511 |
| Q9Y2R9 | 28S ribosomal protein S7, mitochondrial OS=Homo sapiens OX=9606 GN=MRPS7 PE=1 SV=2                              | 0,247481131  | 1,676353 |
| Q16576 | Histone-binding protein RBBP7 OS=Homo sapiens OX=9606 GN=RBBP7 PE=1 SV=1                                        | 0,160529904  | 1,674367 |
| O43432 | Eukaryotic translation initiation factor 4 gamma 3 OS=Homo sapiens OX=9606 GN=EIF4G3 PE=1 SV=2                  | 0,190175206  | 1,673042 |
| O60762 | Dolichol-phosphate mannosyltransferase subunit 1 OS=Homo sapiens OX=9606 GN=DPM1 PE=1 SV=1                      | 0,228142452  | 1,67288  |
| P04080 | Cystatin-B OS=Homo sapiens OX=9606 GN=CSTB PE=1 SV=2                                                            | 0,306028306  | 1,67221  |
| Q9Y2B0 | Protein canopy homolog 2 OS=Homo sapiens OX=9606 GN=CNPY2 PE=1 SV=1                                             | 0,227987063  | 1,671475 |
| Q8IZU2 | WD repeat-containing protein 17 OS=Homo sapiens OX=9606 GN=WDR17 PE=2 SV=2                                      | 0,781908839  | 1,67116  |
| O60220 | Mitochondrial import inner membrane translocase subunit Tim8 A OS=Homo sapiens OX=9606 GN=TIMM8A PE=1 SV=1      | 0,780259267  | 1,668585 |
| Q99590 | Protein SCAF11 OS=Homo sapiens OX=9606 GN=SCAF11 PE=1 SV=2                                                      | 0,35784192   | 1,666965 |
| Q7L5N1 | COP9 signalosome complex subunit 6 OS=Homo sapiens OX=9606 GN=COP56 PE=1 SV=1                                   | -0,200031961 | 1,666729 |
| Q02241 | Kinesin-like protein KIF23 OS=Homo sapiens OX=9606 GN=KIF23 PE=1 SV=3                                           | 0,227408546  | 1,666245 |
| Q96AB3 | Isochorismatase domain-containing protein 2 OS=Homo sapiens OX=9606 GN=ISOC2 PE=1 SV=1                          | -0,304589728 | 1,663087 |
| Q9H6U6 | Breast carcinoma-amplified sequence 3 OS=Homo sapiens OX=9606 GN=BCAS3 PE=1 SV=3                                | 0,774888389  | 1,660173 |
| Q9UPN7 | Serine/threonine-protein phosphatase 6 regulatory subunit 1 OS=Homo sapiens OX=9606 GN=PPP6R1 PE=1 SV=5         | -0,172181635 | 1,658    |
| O00443 | Phosphatidylinositol 4-phosphate 3-kinase C2 domain-containing subunit alpha OS=Homo sapiens OX=9606 GN=PIK3C2A | -0,172122031 | 1,657269 |
| O43747 | AP-1 complex subunit gamma-1 OS=Homo sapiens OX=9606 GN=API1 PE=1 SV=5                                          | -0,121436616 | 1,656488 |
| Q15233 | Non-POU domain-containing octamer-binding protein OS=Homo sapiens OX=9606 GN=NONO PE=1 SV=4                     | -0,133058722 | 1,656401 |
| Q7K285 | Transcription elongation factor SPT6 OS=Homo sapiens OX=9606 GN=SUPT6H PE=1 SV=2                                | 0,106747472  | 1,654962 |
| Q86T12 | Dipeptidyl peptidase 9 OS=Homo sapiens OX=9606 GN=PPP9 PE=1 SV=3                                                | -0,126753012 | 1,654815 |
| Q9Y3C0 | WASH complex subunit 3 OS=Homo sapiens OX=9606 GN=WASHC3 PE=1 SV=1                                              | 0,303248988  | 1,654588 |
| Q00534 | Cyclin-dependent kinase 6 OS=Homo sapiens OX=9606 GN=CDK6 PE=1 SV=1                                             | -0,158984381 | 1,653736 |
| Q13867 | Bleomycin hydrolase OS=Homo sapiens OX=9606 GN=BLMH PE=1 SV=1                                                   | 0,1441241    | 1,652727 |
| Q8IYD1 | Eukaryotic peptide chain release factor GTP-binding subunit ERF3B OS=Homo sapiens OX=9606 GN=GSPT2 PE=1 SV=2    | -0,419875683 | 1,651647 |
| O43402 | ER membrane protein complex subunit 8 OS=Homo sapiens OX=9606 GN=EMC8 PE=1 SV=1                                 | -0,452167858 | 1,651381 |
| Q9B526 | Endoplasmic reticulum resident protein 44 OS=Homo sapiens OX=9606 GN=ERP44 PE=1 SV=1                            | 0,153370714  | 1,651148 |
| Q9P0J0 | NADH dehydrogenase [ubiquinone] 1 alpha subcomplex subunit 13 OS=Homo sapiens OX=9606 GN=NDUFA13 PE=1 SV=3      | -0,354721591 | 1,650892 |
| O43493 | Trans-Golgi network integral membrane protein 2 OS=Homo sapiens OX=9606 GN=TGNL2 PE=1 SV=3                      | 0,198428352  | 1,649984 |
| Q15717 | ELAV-like protein 1 OS=Homo sapiens OX=9606 GN=ELAVL1 PE=1 SV=2                                                 | 0,18805416   | 1,649526 |
| O14964 | Hepatocyte growth factor-regulated tyrosine kinase substrate OS=Homo sapiens OX=9606 GN=HGS PE=1 SV=1           | -0,143892169 | 1,6493   |
| Q96E77 | Pentatricopeptide repeat domain-containing protein 3, mitochondrial OS=Homo sapiens OX=9606 GN=PTCD3 PE=1 SV=3  | 0,210391056  | 1,646989 |
| Q9BP23 | Polyadenylate-binding protein-interacting protein 2 OS=Homo sapiens OX=9606 GN=PAIP2 PE=1 SV=1                  | -0,733562066 | 1,645932 |
| Q92665 | 28S ribosomal protein S31, mitochondrial OS=Homo sapiens OX=9606 GN=MRPS31 PE=1 SV=3                            | -0,763997129 | 1,642989 |
| P53004 | Biliverdin reductase A OS=Homo sapiens OX=9606 GN=BLVRA PE=1 SV=2                                               | -0,139377812 | 1,64257  |
| Q5T280 | Putative methyltransferase C9orf114 OS=Homo sapiens OX=9606 GN=SPOUT1 PE=1 SV=3                                 | -0,763573526 | 1,642317 |
| O14763 | Tumor necrosis factor receptor superfamily member 10B OS=Homo sapiens OX=9606 GN=TNFRSF10B PE=1 SV=2            | 0,224537959  | 1,64035  |
| P20929 | Nebulin OS=Homo sapiens OX=9606 GN=NEB PE=1 SV=5                                                                | 0,144413955  | 1,638528 |
| Q15437 | Protein transport protein Sec23B OS=Homo sapiens OX=9606 GN=SEC23B PE=1 SV=2                                    | 0,131838072  | 1,636757 |
| P60842 | Eukaryotic initiation factor 4A-I OS=Homo sapiens OX=9606 GN=EIF4A1 PE=1 SV=1                                   | -0,105762911 | 1,635054 |
| Q96CW5 | Gamma-tubulin complex component 3 OS=Homo sapiens OX=9606 GN=TUBGCP3 PE=1 SV=2                                  | -0,351545608 | 1,634529 |
| P18124 | 60S ribosomal protein L7 OS=Homo sapiens OX=9606 GN=RPL7 PE=1 SV=1                                              | -0,152149136 | 1,634292 |
| P37268 | Squalene synthase OS=Homo sapiens OX=9606 GN=FDFT1 PE=1 SV=1                                                    | -0,208930251 | 1,63277  |
| Q9BXR0 | Queuine tRNA-ribosyltransferase catalytic subunit 1 OS=Homo sapiens OX=9606 GN=QTRT1 PE=1 SV=3                  | -0,299773652 | 1,632578 |
| Q9UHB9 | Signal recognition particle subunit SRP68 OS=Homo sapiens OX=9606 GN=SRP68 PE=1 SV=2                            | -0,147149424 | 1,63225  |
| P52907 | F-actin-capping protein subunit alpha-1 OS=Homo sapiens OX=9606 GN=CAPZA1 PE=1 SV=3                             | 0,186469852  | 1,632022 |
| O60701 | UDP-glucose 6-dehydrogenase OS=Homo sapiens OX=9606 GN=UGDH PE=1 SV=1                                           | 0,117607138  | 1,631717 |
| Q92620 | Pre-mRNA-splicing factor ATP-dependent RNA helicase PRP16 OS=Homo sapiens OX=9606 GN=DHX38 PE=1 SV=2            | 0,196492316  | 1,629828 |
| Q5VTL8 | Pre-mRNA-splicing factor 38B OS=Homo sapiens OX=9606 GN=PRPF38B PE=1 SV=1                                       | 0,241821847  | 1,629816 |
| Q9B223 | #N/D                                                                                                            | 0,495524     | 1,628365 |
| P24928 | DNA-directed RNA polymerase II subunit RPB1 OS=Homo sapiens OX=9606 GN=POLR2A PE=1 SV=2                         | -0,162821005 | 1,6255   |
| Q04760 | Lactoylglutathione lyase OS=Homo sapiens OX=9606 GN=GLO1 PE=1 SV=4                                              | -0,208140508 | 1,625097 |
| P29966 | Myristoylated alanine-rich C-kinase substrate OS=Homo sapiens OX=9606 GN=MARCKS PE=1 SV=4                       | 0,169299772  | 1,622782 |
| Q9ULC4 | Malignant T-cell-amplified sequence 1 OS=Homo sapiens OX=9606 GN=MCTS1 PE=1 SV=1                                | 0,222580077  | 1,622742 |
| Q9H8K9 | Serine methyltransferase OS=Homo sapiens OX=9606 GN=AS3MT PE=1 SV=3                                             | -0,168901208 | 1,61793  |
| Q96QC0 | Serine/threonine-protein phosphatase 1 regulatory subunit 10 OS=Homo sapiens OX=9606 GN=PPP1R10 PE=1 SV=1       | -0,264253846 | 1,617707 |
| Q9H2M9 | Rab3 GTPase-activating protein non-catalytic subunit OS=Homo sapiens OX=9606 GN=RAB3GAP2 PE=1 SV=1              | 0,119231099  | 1,61751  |
| Q7Z7K0 | COX assembly mitochondrial protein homolog OS=Homo sapiens OX=9606 GN=CMC1 PE=1 SV=1                            | -0,442684122 | 1,616605 |
| Q6NZ67 | Mitotic-spindle organizing protein 2B OS=Homo sapiens OX=9606 GN=MZT2B PE=1 SV=1                                | -0,747457293 | 1,616564 |
| Q92979 | Ribosomal RNA small subunit methyltransferase NEP1 OS=Homo sapiens OX=9606 GN=EMG1 PE=1 SV=4                    | -0,240200788 | 1,616533 |
| Q06495 | Sodium-dependent phosphate transport protein 2A OS=Homo sapiens OX=9606 GN=SLC34A1 PE=1 SV=1                    | 0,513429938  | 1,616427 |
| Q9H299 | SH3 domain-binding glutamic acid-rich-like protein 3 OS=Homo sapiens OX=9606 GN=SH3BGLR3 PE=1 SV=1              | -0,264078328 | 1,616423 |
| Q6YHK3 | CD109 antigen OS=Homo sapiens OX=9606 GN=CD109 PE=1 SV=2                                                        | -0,184530579 | 1,610667 |
| Q9B4Y3 | Charged multivesicular body protein 4a OS=Homo sapiens OX=9606 GN=CHMP4A PE=1 SV=3                              | 0,29621184   | 1,610048 |
| P35659 | Protein DEK OS=Homo sapiens OX=9606 GN=DEK PE=1 SV=1                                                            | -0,168249854 | 1,610008 |
| Q8IVM0 | Coiled-coil domain-containing protein 50 OS=Homo sapiens OX=9606 GN=CCDC50 PE=1 SV=1                            | -0,184465681 | 1,609953 |
| Q9H6D7 | HAUS augmin-like complex subunit 4 OS=Homo sapiens OX=9606 GN=HAUSA PE=1 SV=1                                   | -0,439934936 | 1,606427 |
| Q9H7D7 | WD repeat-containing protein 26 OS=Homo sapiens OX=9606 GN=WDR26 PE=1 SV=3                                      | -0,220742121 | 1,606251 |
| P62314 | Small nuclear ribonucleoprotein Sm D1 OS=Homo sapiens OX=9606 GN=SNRPD1 PE=1 SV=1                               | 0,345554606  | 1,603656 |

|        |                                                                                                                    |              |          |
|--------|--------------------------------------------------------------------------------------------------------------------|--------------|----------|
| Q03001 | Dystonin OS=Homo sapiens OX=9606 GN=DST PE=1 SV=4                                                                  | 0,043671108  | 1,600825 |
| Q07666 | KH domain-containing, RNA-binding, signal transduction-associated protein 1 OS=Homo sapiens OX=9606 GN=KHDRBS1 P   | -0,205570917 | 1,60019  |
| Q9UBEO | SUMO-activating enzyme subunit 1 OS=Homo sapiens OX=9606 GN=SAE1 PE=1 SV=1                                         | -0,144860187 | 1,599723 |
| Q9NY27 | Serine/threonine-protein phosphatase 4 regulatory subunit 2 OS=Homo sapiens OX=9606 GN=PPP4R2 PE=1 SV=3            | -0,2945727   | 1,599691 |
| P62244 | 40S ribosomal protein S15a OS=Homo sapiens OX=9606 GN=RPS15A PE=1 SV=2                                             | -0,238095979 | 1,59932  |
| O14828 | Secretory carrier-associated membrane protein 3 OS=Homo sapiens OX=9606 GN=SCAMP3 PE=1 SV=3                        | 0,219889635  | 1,598615 |
| Q9H0L4 | Cleavage stimulation factor subunit 2 tau variant OS=Homo sapiens OX=9606 GN=CSTF2T PE=1 SV=1                      | -0,437536524 | 1,597650 |
| Q8WWM7 | Ataxin-2-like protein OS=Homo sapiens OX=9606 GN=ATXN2L PE=1 SV=2                                                  | -0,11803571  | 1,596519 |
| Q8N5A5 | Zinc finger CCHC-type with G patch domain-containing protein OS=Homo sapiens OX=9606 GN=ZGPAT PE=1 SV=3            | -0,735061888 | 1,596496 |
| Q9Y5S9 | RNA-binding protein 8A OS=Homo sapiens OX=9606 GN=RBM8A PE=1 SV=1                                                  | -0,193209256 | 1,595799 |
| Q96J01 | THO complex subunit 3 OS=Homo sapiens OX=9606 GN=THOC3 PE=1 SV=1                                                   | -0,261129362 | 1,594877 |
| P06576 | ATP synthase subunit beta, mitochondrial OS=Homo sapiens OX=9606 GN=ATP5F1B PE=1 SV=3                              | -0,117935861 | 1,59477  |
| Q9Y2Z4 | Tyrosine--tRNA ligase, mitochondrial OS=Homo sapiens OX=9606 GN=YARS2 PE=1 SV=2                                    | -0,343770433 | 1,594461 |
| Q7Z5K2 | Wings apart-like protein homolog OS=Homo sapiens OX=9606 GN=WAPL PE=1 SV=1                                         | 0,293618431  | 1,593664 |
| P17480 | Nucleolar transcription factor 1 OS=Homo sapiens OX=9606 GN=UBTF PE=1 SV=1                                         | -0,154325525 | 1,592033 |
| Q9BT40 | Inositol polyphosphate 5-phosphatase K OS=Homo sapiens OX=9606 GN=INPP5K PE=1 SV=3                                 | -0,435658832 | 1,59072  |
| Q9BV86 | N-terminal Xaa-Pro-Lys N-methyltransferase 1 OS=Homo sapiens OX=9606 GN=NTMT1 PE=1 SV=3                            | 0,34288564   | 1,589901 |
| Q9NYU2 | UDP-glucose:glycoprotein glucosyltransferase 1 OS=Homo sapiens OX=9606 GN=UGGT1 PE=1 SV=3                          | -0,08686651  | 1,589514 |
| P11117 | Lysosomal acid phosphatase OS=Homo sapiens OX=9606 GN=ACP2 PE=1 SV=3                                               | -0,260387746 | 1,589465 |
| O75122 | CLIP-associating protein 2 OS=Homo sapiens OX=9606 GN=CLASP2 PE=1 SV=3                                             | 0,166358166  | 1,587069 |
| Q15056 | Eukaryotic translation initiation factor 4H OS=Homo sapiens OX=9606 GN=EIF4H PE=1 SV=5                             | -0,148705161 | 1,587068 |
| Q9UKA4 | A-kinase anchor protein 11 OS=Homo sapiens OX=9606 GN=AKAP11 PE=1 SV=1                                             | 0,259955272  | 1,586311 |
| O75691 | Small subunit processome component 20 homolog OS=Homo sapiens OX=9606 GN=UTP20 PE=1 SV=3                           | -0,153814405 | 1,585308 |
| Q9Y496 | Kinesin-like protein KIF3A OS=Homo sapiens OX=9606 GN=KIF3A PE=1 SV=4                                              | -0,236264183 | 1,584369 |
| P01023 | Alpha-2-macroglobulin OS=Homo sapiens OX=9606 GN=A2M PE=1 SV=3                                                     | 0,259609878  | 1,583793 |
| Q00535 | Cyclin-dependent kinase 5 OS=Homo sapiens OX=9606 GN=CDK5 PE=1 SV=3                                                | -0,259511588 | 1,583076 |
| O00767 | Acyl-CoA desaturase OS=Homo sapiens OX=9606 GN=SCD PE=1 SV=2                                                       | -0,726703765 | 1,582835 |
| Q7Z3B4 | Nucleoporin p54 OS=Homo sapiens OX=9606 GN=NUP54 PE=1 SV=2                                                         | 0,191791728  | 1,581166 |
| Q00796 | Sorbitol dehydrogenase OS=Homo sapiens OX=9606 GN=SORD PE=1 SV=4                                                   | -0,191744693 | 1,580681 |
| Q8NEF9 | Serum response factor-binding protein 1 OS=Homo sapiens OX=9606 GN=SRFBP1 PE=1 SV=1                                | 0,725084831  | 1,580176 |
| Q9H5V9 | VPF0428 protein CXorf56 OS=Homo sapiens OX=9606 GN=CXorf56 PE=1 SV=1                                               | 0,72485052   | 1,579791 |
| O75391 | Sperm-associated antigen 7 OS=Homo sapiens OX=9606 GN=SPAG7 PE=1 SV=2                                              | 0,259041748  | 1,579652 |
| Q9Y486 | DDB1- and CUL4-associated factor 1 OS=Homo sapiens OX=9606 GN=DCAF1 PE=1 SV=3                                      | -0,217759667 | 1,579574 |
| O00555 | Protein kinase C delta type OS=Homo sapiens OX=9606 GN=PRKCD PE=1 SV=2                                             | -0,258548244 | 1,576056 |
| P08397 | Porphobilinogen deaminase OS=Homo sapiens OX=9606 GN=HMBS PE=1 SV=2                                                | 0,290767907  | 1,575674 |
| Q8TC79 | Minor histocompatibility antigen H13 OS=Homo sapiens OX=9606 GN=HM13 PE=1 SV=1                                     | 0,217242419  | 1,574958 |
| Q9NQA3 | Wash protein family homolog 6 OS=Homo sapiens OX=9606 GN=WASH6P PE=1 SV=3                                          | -0,431040368 | 1,573669 |
| Q9Y2G5 | GDP-fucose protein O-fucosyltransferase 2 OS=Homo sapiens OX=9606 GN=POFUT2 PE=1 SV=3                              | 0,258219822  | 1,573664 |
| Q8TER5 | Rho guanine nucleotide exchange factor 40 OS=Homo sapiens OX=9606 GN=ARHGEF40 PE=1 SV=3                            | 0,33973158   | 1,573645 |
| Q13526 | Peptidyl-prolyl cis-trans isomerase NIMA-interacting 1 OS=Homo sapiens OX=9606 GN=PINI1 PE=1 SV=1                  | -0,202783827 | 1,573286 |
| Q9Y2W6 | Tudor and KH domain-containing protein OS=Homo sapiens OX=9606 GN=TRDKH PE=1 SV=2                                  | -0,339253544 | 1,571181 |
| Q9HCS7 | Pre-mRNA-splicing factor SYF1 OS=Homo sapiens OX=9606 GN=XAB2 PE=1 SV=2                                            | -0,202493759 | 1,570492 |
| Q13423 | NAD(P) transhydrogenase, mitochondrial OS=Homo sapiens OX=9606 GN=NNT PE=1 SV=3                                    | 0,142770778  | 1,57022  |
| Q13033 | Striatin-3 OS=Homo sapiens OX=9606 GN=STRN3 PE=1 SV=3                                                              | 0,338907246  | 1,569396 |
| Q9HC98 | Serine/threonine-protein kinase Nek6 OS=Homo sapiens OX=9606 GN=NEK6 PE=1 SV=2                                     | 0,682581429  | 1,569368 |
| Q6Z517 | Rho family-interacting cell polarization regulator 1 OS=Homo sapiens OX=9606 GN=RIPOR1 PE=1 SV=1                   | 0,202370756  | 1,569308 |
| Q9H977 | WD repeat-containing protein 54 OS=Homo sapiens OX=9606 GN=WDR54 PE=1 SV=1                                         | -0,429709208 | 1,568745 |
| P20340 | Ras-related protein Rab-6A OS=Homo sapiens OX=9606 GN=RAB6A PE=1 SV=3                                              | -0,33829551  | 1,566243 |
| Q99490 | Arf-GAP with GTPase, ANK repeat and PH domain-containing protein 2 OS=Homo sapiens OX=9606 GN=AGAP2 PE=1 SV=2      | -0,480792806 | 1,566088 |
| Q15269 | Periodic tryptophan protein 2 homolog OS=Homo sapiens OX=9606 GN=PWP2 PE=2 SV=2                                    | 0,338072492  | 1,565094 |
| Q9Y6K9 | NF-kappa-B essential modulator OS=Homo sapiens OX=9606 GN=IKBK G PE=1 SV=2                                         | 0,180278328  | 1,564118 |
| Q9UHX1 | Poly(U)-binding-splicing factor PUF60 OS=Homo sapiens OX=9606 GN=PUF60 PE=1 SV=1                                   | -0,134132741 | 1,563444 |
| P36542 | ATP synthase subunit gamma, mitochondrial OS=Homo sapiens OX=9606 GN=ATP5F1C PE=1 SV=1                             | -0,201676402 | 1,562627 |
| P10636 | Microtubule-associated protein tau OS=Homo sapiens OX=9606 GN=MAPT PE=1 SV=5                                       | 0,33747729   | 1,562026 |
| Q8NHP8 | Putative phospholipase B-like 2 OS=Homo sapiens OX=9606 GN=PLBD2 PE=1 SV=2                                         | -0,233249641 | 1,559828 |
| Q6PD74 | Alpha- and gamma-adaptin-binding protein p34 OS=Homo sapiens OX=9606 GN=AAGAB PE=1 SV=1                            | -0,427235767 | 1,559585 |
| Q00403 | Transcription initiation factor IIB OS=Homo sapiens OX=9606 GN=GTF2B PE=1 SV=1                                     | 0,712462905  | 1,559313 |
| P23193 | Transcription elongation factor A protein 1 OS=Homo sapiens OX=9606 GN=TCEA1 PE=1 SV=2                             | -0,179638252 | 1,557144 |
| Q9UL12 | Sarcosine dehydrogenase, mitochondrial OS=Homo sapiens OX=9606 GN=SRDH PE=1 SV=1                                   | 0,336445424  | 1,556708 |
| P33981 | Dual specificity protein kinase TTK OS=Homo sapiens OX=9606 GN=TTK PE=1 SV=2                                       | -0,426405651 | 1,556508 |
| P51148 | Ras-related protein Rab-5C OS=Homo sapiens OX=9606 GN=RAB5C PE=1 SV=2                                              | 0,189385005  | 1,556404 |
| P21964 | Catechol O-methyltransferase OS=Homo sapiens OX=9606 GN=COMT PE=1 SV=2                                             | 0,163775141  | 1,555905 |
| Q9BZQ8 | Protein Niban OS=Homo sapiens OX=9606 GN=FAM129A PE=1 SV=1                                                         | -0,151546018 | 1,55557  |
| Q9H254 | Spectrin beta chain, non-erythrocytic 4 OS=Homo sapiens OX=9606 GN=SPTBN4 PE=1 SV=2                                | -0,425795865 | 1,554247 |
| Q96JP5 | E3 ubiquitin-protein ligase ZFP91 OS=Homo sapiens OX=9606 GN=ZFP91 PE=1 SV=1                                       | 0,708855579  | 1,553305 |
| P19320 | #N/D                                                                                                               | -0,707374012 | 1,55315  |
| Q96RKO | Protein capicua homolog OS=Homo sapiens OX=9606 GN=CIC PE=1 SV=2                                                   | -0,707601626 | 1,551212 |
| Q6Z712 | E3 ubiquitin-protein ligase UBR3 OS=Homo sapiens OX=9606 GN=UBR3 PE=2 SV=2                                         | -0,424253968 | 1,548528 |
| Q9Y5B6 | PAX3- and PAX7-binding protein 1 OS=Homo sapiens OX=9606 GN=PAXBP1 PE=1 SV=2                                       | 0,424163719  | 1,548193 |
| O60287 | Nucleolar pre-ribosomal-associated protein 1 OS=Homo sapiens OX=9606 GN=URB1 PE=1 SV=4                             | -0,200173619 | 1,548193 |
| Q8IWT6 | Volume-regulated anion channel subunit LRRC8A OS=Homo sapiens OX=9606 GN=LRRC8A PE=1 SV=1                          | 0,214203778  | 1,547904 |
| Q6P3W7 | SCY1-like protein 2 OS=Homo sapiens OX=9606 GN=SCYL2 PE=1 SV=1                                                     | -0,178660799 | 1,546511 |
| Q9NTK5 | Obg-like ATPase 1 OS=Homo sapiens OX=9606 GN=OLA1 PE=1 SV=2                                                        | -0,141061976 | 1,546222 |
| Q01970 | 1-phosphatidylinositol 4,5-bisphosphate phosphodiesterase beta-3 OS=Homo sapiens OX=9606 GN=PLCB3 PE=1 SV=2        | -0,110621684 | 1,546052 |
| Q9HA00 | Guanine nucleotide-binding protein subunit beta-4 OS=Homo sapiens OX=9606 GN=GNB4 PE=1 SV=3                        | -0,162849475 | 1,544782 |
| P52747 | Zinc finger protein 143 OS=Homo sapiens OX=9606 GN=ZNF143 PE=1 SV=2                                                | -0,703489316 | 1,54433  |
| Q9H583 | HEAT repeat-containing protein 1 OS=Homo sapiens OX=9606 GN=HEATR1 PE=1 SV=3                                       | -0,120154226 | 1,544272 |
| O00629 | Importin subunit alpha-3 OS=Homo sapiens OX=9606 GN=KPNA4 PE=1 SV=1                                                | 0,156372514  | 1,544046 |
| Q07812 | Apoptosis regulator BAX OS=Homo sapiens OX=9606 GN=BAX PE=1 SV=1                                                   | 0,25414121   | 1,544007 |
| P50750 | Cyclin-dependent kinase 9 OS=Homo sapiens OX=9606 GN=CDK9 PE=1 SV=3                                                | -0,285637203 | 1,543348 |
| P49662 | Caspase-4 OS=Homo sapiens OX=9606 GN=CASP4 PE=1 SV=1                                                               | 0,247729781  | 1,541953 |
| Q15003 | Condensin complex subunit 2 OS=Homo sapiens OX=9606 GN=NCAPH PE=1 SV=3                                             | -0,150489908 | 1,541785 |
| Q58717 | Putative ATP-dependent RNA helicase TDRD12 OS=Homo sapiens OX=9606 GN=TDRD12 PE=2 SV=2                             | 0,435569705  | 1,541037 |
| P30154 | Serine/threonine-protein phosphatase 2A 65 kDa regulatory subunit A beta isoform OS=Homo sapiens OX=9606 GN=PPP2R2 | 0,156105389  | 1,540699 |
| Q8N668 | COMM domain-containing protein 1 OS=Homo sapiens OX=9606 GN=COMMD1 PE=1 SV=1                                       | -0,700795628 | 1,539808 |
| Q9Y2U5 | Mitogen-activated protein kinase kinase kinase 2 OS=Homo sapiens OX=9606 GN=MAP3K2 PE=1 SV=2                       | -0,699588474 | 1,537778 |
| Q9Y3D8 | Adenylate kinase isoenzyme 6 OS=Homo sapiens OX=9606 GN=AK6 PE=1 SV=1                                              | 0,420809921  | 1,535736 |
| O75970 | Multiple PDZ domain protein OS=Homo sapiens OX=9606 GN=MPDZ PE=1 SV=2                                              | 0,187272464  | 1,534755 |
| Q6ZW77 | Lysophospholipid acyltransferase 2 OS=Homo sapiens OX=9606 GN=MBOAT2 PE=2 SV=2                                     | 0,697792509  | 1,534754 |
| O14617 | AP-3 complex subunit delta-1 OS=Homo sapiens OX=9606 GN=AP3D1 PE=1 SV=1                                            | -0,104106763 | 1,533913 |
| Q8NEW0 | Zinc transporter 7 OS=Homo sapiens OX=9606 GN=SLC30A7 PE=2 SV=1                                                    | 0,420224178  | 1,533558 |

|        |                                                                                                            |              |          |
|--------|------------------------------------------------------------------------------------------------------------|--------------|----------|
| Q9NSCS | Homer protein homolog 3 OS=Homo sapiens OX=9606 GN=HOMER3 PE=1 SV=2                                        | -0,229934499 | 1,53293  |
| Q15363 | Transmembrane emp24 domain-containing protein 2 OS=Homo sapiens OX=9606 GN=TMED2 PE=1 SV=1                 | -0,21246949  | 1,532511 |
| Q8WYA0 | Intraflagellar transport protein 81 homolog OS=Homo sapiens OX=9606 GN=IFT81 PE=1 SV=1                     | -0,696449542 | 1,532488 |
| Q8IXB1 | DnaI homolog subfamily C member 10 OS=Homo sapiens OX=9606 GN=DNAIC10 PE=1 SV=2                            | -0,177340928 | 1,532186 |
| P49137 | MAP kinase-activated protein kinase 2 OS=Homo sapiens OX=9606 GN=MAPKAPK2 PE=1 SV=1                        | -0,252304282 | 1,530681 |
| O60831 | PRA1 family protein 2 OS=Homo sapiens OX=9606 GN=PRAF2 PE=1 SV=1                                           | -0,33131112  | 1,530248 |
| Q9UPN3 | Microtubule-actin cross-linking factor 1, isoforms 1/2/3/5 OS=Homo sapiens OX=9606 GN=MACF1 PE=1 SV=4      | 0,050435001  | 1,528677 |
| Q96DH6 | RNA-binding protein Musashi homolog 2 OS=Homo sapiens OX=9606 GN=MSI2 PE=1 SV=1                            | -0,198097178 | 1,528304 |
| P16333 | Cytoplasmic protein NCK1 OS=Homo sapiens OX=9606 GN=NCK1 PE=1 SV=1                                         | -0,229327071 | 1,528012 |
| P52594 | Arf-GAP domain and FG repeat-containing protein 1 OS=Homo sapiens OX=9606 GN=AGFG1 PE=1 SV=2               | -0,211906936 | 1,527526 |
| P09619 | Platelet-derived growth factor receptor beta OS=Homo sapiens OX=9606 GN=PDGFRB PE=1 SV=1                   | -0,251860845 | 1,527467 |
| O75312 | Zinc finger protein ZPR1 OS=Homo sapiens OX=9606 GN=ZPR1 PE=1 SV=1                                         | 0,251768452  | 1,526798 |
| Q8WZ42 | Titin OS=Homo sapiens OX=9606 GN=TTN PE=1 SV=4                                                             | 0,418322597  | 1,526485 |
| Q13492 | Phosphatidylinositol-binding clathrin assembly protein OS=Homo sapiens OX=9606 GN=PICALM PE=1 SV=2         | 0,128034045  | 1,524889 |
| Q14008 | Cytoskeleton-associated protein 5 OS=Homo sapiens OX=9606 GN=CKAP5 PE=1 SV=3                               | 0,066239966  | 1,524632 |
| A2RRP1 | Neuroblastoma-amplified sequence OS=Homo sapiens OX=9606 GN=NBA5 PE=1 SV=2                                 | -0,282279597 | 1,522233 |
| Q9Y5M8 | Signal recognition particle receptor subunit beta OS=Homo sapiens OX=9606 GN=SRPRB PE=1 SV=3               | 0,17624771   | 1,520349 |
| P0DPB6 | DNA-directed RNA polymerases I and III subunit RPAC2 OS=Homo sapiens OX=9606 GN=POLR1D PE=1 SV=1           | 0,688829616  | 1,519583 |
| Q9P2E7 | Protocadherin-10 OS=Homo sapiens OX=9606 GN=PCDH10 PE=2 SV=2                                               | -0,328868085 | 1,517659 |
| Q9UH62 | Armadillo repeat-containing X-linked protein 3 OS=Homo sapiens OX=9606 GN=ARMCX3 PE=1 SV=1                 | 0,686784292  | 1,516103 |
| Q9Y4K1 | Beta/gamma crystallin domain-containing protein 1 OS=Homo sapiens OX=9606 GN=CRYBG1 PE=1 SV=3              | -0,227777132 | 1,515478 |
| Q16637 | Survival motor neuron protein OS=Homo sapiens OX=9606 GN=SNN1 PE=1 SV=1                                    | 0,686199904  | 1,515107 |
| P22681 | E3 ubiquitin-protein ligase CBL OS=Homo sapiens OX=9606 GN=CBL PE=1 SV=2                                   | -0,169074512 | 1,514815 |
| P69905 | Hemoglobin subunit alpha OS=Homo sapiens OX=9606 GN=HBA1 PE=1 SV=2                                         | 1,141719873  | 1,514584 |
| P08579 | U2 small nuclear ribonucleoprotein B'' OS=Homo sapiens OX=9606 GN=SNRBP2 PE=1 SV=1                         | -0,281049324 | 1,514504 |
| O96033 | Molybdopterin synthase sulfur carrier subunit OS=Homo sapiens OX=9606 GN=MOCS2 PE=1 SV=1                   | 0,28104171   | 1,514456 |
| Q9NZW5 | MAGUK p55 subfamily member 6 OS=Homo sapiens OX=9606 GN=MPP6 PE=1 SV=2                                     | -0,414867058 | 1,513614 |
| P14618 | Pyruvate kinase PKM OS=Homo sapiens OX=9606 GN=PKM PE=1 SV=4                                               | 0,085626316  | 1,513511 |
| Q8IV38 | Ankyrin repeat and MYND domain-containing protein 2 OS=Homo sapiens OX=9606 GN=ANKMY2 PE=1 SV=1            | -0,328042842 | 1,513407 |
| O00192 | Armadillo repeat protein deleted in velo-cardio-facial syndrome OS=Homo sapiens OX=9606 GN=ARVCF PE=1 SV=1 | -0,467004134 | 1,512143 |
| P55036 | 26S proteasome non-ATPase regulatory subunit 4 OS=Homo sapiens OX=9606 GN=PSMD4 PE=1 SV=1                  | -0,167065704 | 1,509769 |
| Q86X83 | COMMD domain-containing protein 2 OS=Homo sapiens OX=9606 GN=COMMD2 PE=1 SV=2                              | -0,280135728 | 1,508767 |
| P30519 | Heme oxygenase 2 OS=Homo sapiens OX=9606 GN=HMOX2 PE=1 SV=2                                                | -0,153499175 | 1,508165 |
| Q14146 | Unhealthy ribosome biogenesis protein 2 homolog OS=Homo sapiens OX=9606 GN=URB2 PE=1 SV=2                  | 0,91438367   | 1,507313 |
| P61204 | ADP-ribosylation factor 3 OS=Homo sapiens OX=9606 GN=ARF3 PE=1 SV=2                                        | -0,175006664 | 1,506943 |
| P04424 | Argininosuccinate lyase OS=Homo sapiens OX=9606 GN=ASL PE=1 SV=4                                           | -0,681137226 | 1,50646  |
| Q9NXG2 | THUMP domain-containing protein 1 OS=Homo sapiens OX=9606 GN=THUMP1 PE=1 SV=2                              | 0,17495768   | 1,506415 |
| P35580 | Myosin-10 OS=Homo sapiens OX=9606 GN=MYH10 PE=1 SV=3                                                       | -0,060675233 | 1,505444 |
| Q6P1X5 | Transcription initiation factor TFIID subunit 2 OS=Homo sapiens OX=9606 GN=TAF2 PE=1 SV=3                  | -0,16542685  | 1,505126 |
| P04439 | HLA class I histocompatibility antigen, A-3 alpha chain OS=Homo sapiens OX=9606 GN=HLA-A PE=1 SV=2         | -0,279506542 | 1,504818 |
| Q9H2I4 | Phosducin-like protein 3 OS=Homo sapiens OX=9606 GN=PDCL3 PE=1 SV=1                                        | -0,15941201  | 1,503686 |
| Q8WUM4 | Programmed cell death 6-interacting protein OS=Homo sapiens OX=9606 GN=PDCC6IP PE=1 SV=1                   | -0,08517327  | 1,503132 |
| Q9BRG1 | Vacuolar protein-sorting-associated protein 25 OS=Homo sapiens OX=9606 GN=VPS25 PE=1 SV=1                  | -0,226244319 | 1,503103 |
| Q9NYH9 | U3 small nucleolar RNA-associated protein 6 homolog OS=Homo sapiens OX=9606 GN=UTP6 PE=2 SV=2              | -0,678505781 | 1,501949 |
| Q92604 | Acyl-CoA:lysophosphatidylglycerol acyltransferase 1 OS=Homo sapiens OX=9606 GN=LPGAT1 PE=1 SV=1            | -0,208987003 | 1,501712 |
| Q8N129 | Protein canopy homolog 4 OS=Homo sapiens OX=9606 GN=CNPY4 PE=2 SV=1                                        | -0,278947344 | 1,501309 |
| Q9UL26 | Ras-related protein Rab-22A OS=Homo sapiens OX=9606 GN=RAB22A PE=1 SV=2                                    | -0,678052615 | 1,501171 |
| P18206 | Vinculin OS=Homo sapiens OX=9606 GN=VCL PE=1 SV=4                                                          | 0,068396579  | 1,50083  |
| P33527 | Multidrug resistance-associated protein 1 OS=Homo sapiens OX=9606 GN=ABCC1 PE=1 SV=3                       | -0,183890791 | 1,50027  |
| P61247 | 40S ribosomal protein S3a OS=Homo sapiens OX=9606 GN=RP53A PE=1 SV=2                                       | -0,120213704 | 1,499735 |
| Q15004 | PCNA-associated factor OS=Homo sapiens OX=9606 GN=PCLAF PE=1 SV=1                                          | -0,41095257  | 1,499008 |
| Q9H6K5 | Proline-rich protein 36 OS=Homo sapiens OX=9606 GN=PRR36 PE=1 SV=2                                         | -0,676525554 | 1,498547 |
| Q8TBX8 | Phosphatidylinositol 5-phosphate 4-kinase type-2 gamma OS=Homo sapiens OX=9606 GN=PIP4K2C PE=1 SV=3        | 0,325134943  | 1,498425 |
| P20248 | Cyclin-A2 OS=Homo sapiens OX=9606 GN=CCNA2 PE=1 SV=2                                                       | 0,32498721   | 1,497664 |
| Q9UNL2 | Translocon-associated protein subunit gamma OS=Homo sapiens OX=9606 GN=SSR3 PE=1 SV=1                      | 0,330163447  | 1,497594 |
| Q12802 | A-kinase anchor protein 13 OS=Homo sapiens OX=9606 GN=AKAP13 PE=1 SV=2                                     | 0,194872025  | 1,497542 |
| P06756 | Integrin alpha-V OS=Homo sapiens OX=9606 GN=ITGAV PE=1 SV=2                                                | 0,183481752  | 1,496113 |
| Q15397 | Pumilio homolog 3 OS=Homo sapiens OX=9606 GN=PUM3 PE=1 SV=3                                                | -0,194571986 | 1,494688 |
| P47897 | Glutamine--tRNA ligase OS=Homo sapiens OX=9606 GN=QARS PE=1 SV=1                                           | -0,084783471 | 1,494224 |
| Q9NTM9 | Copper homeostasis protein cutC homolog OS=Homo sapiens OX=9606 GN=CUTC PE=1 SV=1                          | -0,673286017 | 1,492969 |
| P54136 | Arginine--tRNA ligase, cytoplasmic OS=Homo sapiens OX=9606 GN=RARS PE=1 SV=2                               | -0,095355382 | 1,488526 |
| Q9Y303 | N-acetylglucosamine-6-phosphate deacetylase OS=Homo sapiens OX=9606 GN=AMDHD2 PE=1 SV=2                    | -0,224423392 | 1,48843  |
| Q13107 | Ubiquitin carboxyl-terminal hydrolase 4 OS=Homo sapiens OX=9606 GN=USP4 PE=1 SV=3                          | 0,246461409  | 1,488425 |
| Q16563 | Synaptophysin-like protein 1 OS=Homo sapiens OX=9606 GN=SYPL1 PE=1 SV=1                                    | 0,276700158  | 1,487218 |
| O60684 | Importin subunit alpha-7 OS=Homo sapiens OX=9606 GN=KPNA6 PE=1 SV=1                                        | -0,146171636 | 1,485818 |
| Q53GQ0 | Very-long-chain 3-oxoacyl-CoA reductase OS=Homo sapiens OX=9606 GN=HSD17B12 PE=1 SV=2                      | -0,157884875 | 1,485535 |
| O00255 | Menin OS=Homo sapiens OX=9606 GN=MEN1 PE=1 SV=4                                                            | -0,406801118 | 1,485438 |
| P35916 | Vascular endothelial growth factor receptor 3 OS=Homo sapiens OX=9606 GN=FLT4 PE=1 SV=3                    | 0,455197939  | 1,484973 |
| Q5BJF2 | Sigma intracellular receptor 2 OS=Homo sapiens OX=9606 GN=TMEM97 PE=1 SV=1                                 | -0,66856586  | 1,484809 |
| P42766 | 60S ribosomal protein L35 OS=Homo sapiens OX=9606 GN=RPL35 PE=1 SV=2                                       | -0,322377932 | 1,484223 |
| Q9BXW9 | Fanconi anemia group D2 protein OS=Homo sapiens OX=9606 GN=FANCD2 PE=1 SV=2                                | -0,193425678 | 1,483798 |
| Q9BTV5 | Fibronectin type III and SPRY domain-containing protein 1 OS=Homo sapiens OX=9606 GN=FSD1 PE=1 SV=1        | -0,245560394 | 1,481927 |
| P14621 | Acylphosphatase 2 OS=Homo sapiens OX=9606 GN=ACYP2 PE=1 SV=2                                               | -0,666289832 | 1,480862 |
| Q5T0F9 | Coiled-coil and C2 domain-containing protein 1B OS=Homo sapiens OX=9606 GN=CC2D1B PE=1 SV=1                | -0,321319817 | 1,478773 |
| P78316 | Nucleolar protein 14 OS=Homo sapiens OX=9606 GN=NOP14 PE=1 SV=3                                            | -0,245097086 | 1,478588 |
| Q96AQ6 | Pre-B-cell leukemia transcription factor-interacting protein 1 OS=Homo sapiens OX=9606 GN=PBXIP1 PE=1 SV=1 | 0,157273263  | 1,478283 |
| Q96RQ3 | Methylcrotonoyl-CoA carboxylase subunit alpha, mitochondrial OS=Homo sapiens OX=9606 GN=MCCCA1 PE=1 SV=3   | -0,405358674 | 1,478091 |
| Q9NQ57 | Inner centromere protein OS=Homo sapiens OX=9606 GN=INCENP PE=1 SV=3                                       | -0,801235632 | 1,477744 |
| Q5M775 | Cytospin-B OS=Homo sapiens OX=9606 GN=SPEC11 PE=1 SV=1                                                     | -0,405096894 | 1,477111 |
| Q8N2G8 | GH3 domain-containing protein OS=Homo sapiens OX=9606 GN=GHDC PE=1 SV=2                                    | -0,253119477 | 1,476841 |
| Q14596 | Next to BRCA1 gene 1 protein OS=Homo sapiens OX=9606 GN=NBR1 PE=1 SV=3                                     | 0,624719735  | 1,476694 |
| P28065 | Proteasome subunit beta type-9 OS=Homo sapiens OX=9606 GN=PSMB9 PE=1 SV=2                                  | -0,404861357 | 1,476229 |
| A40I9  | GTP-binding protein 10 OS=Homo sapiens OX=9606 GN=GTPBP10 PE=1 SV=1                                        | -0,404763121 | 1,475861 |
| Q9BZG1 | Ras-related protein Rab-34 OS=Homo sapiens OX=9606 GN=RAB34 PE=1 SV=1                                      | -0,181287319 | 1,473865 |
| Q9NS69 | Mitochondrial import receptor subunit TOM22 homolog OS=Homo sapiens OX=9606 GN=TOMM22 PE=1 SV=3            | 0,274522511  | 1,473577 |
| P16083 | Ribosyl(dihydro)nicotinamide dehydrogenase [quinone] OS=Homo sapiens OX=9606 GN=NQO2 PE=1 SV=5             | 0,320142297  | 1,472709 |
| Q15018 | BRIS complex subunit Abraxas 2 OS=Homo sapiens OX=9606 GN=ABRAXAS2 PE=1 SV=2                               | -0,320087299 | 1,472426 |
| O00411 | DNA-directed RNA polymerase, mitochondrial OS=Homo sapiens OX=9606 GN=POLRMT PE=1 SV=2                     | 0,403683423  | 1,471817 |
| P55268 | Laminin subunit beta-2 OS=Homo sapiens OX=9606 GN=LAMB2 PE=1 SV=2                                          | 0,660883252  | 1,471451 |
| Q2PPJ7 | #N/D                                                                                                       | -1,147803643 | 1,470981 |
| P57723 | Poly(rC)-binding protein 4 OS=Homo sapiens OX=9606 GN=PCBP4 PE=2 SV=1                                      | -0,243785536 | 1,469141 |

|        |                                                                                                                     |              |          |
|--------|---------------------------------------------------------------------------------------------------------------------|--------------|----------|
| P09972 | Fructose-bisphosphate aldolase C OS=Homo sapiens OX=9606 GN=ALDOC PE=1 SV=2                                         | 0,142003327  | 1,467946 |
| Q9Y3B3 | Transmembrane emp24 domain-containing protein 7 OS=Homo sapiens OX=9606 GN=TMED7 PE=1 SV=2                          | 0,243455758  | 1,466768 |
| P43034 | Platelet-activating factor acetylhydrolase IB subunit alpha OS=Homo sapiens OX=9606 GN=PFAFH1B1 PE=1 SV=2           | -0,12416265  | 1,466159 |
| Q96QG7 | Myotubularin-related protein 9 OS=Homo sapiens OX=9606 GN=MTMR9 PE=1 SV=1                                           | -0,657242287 | 1,465086 |
| P00367 | Glutamate dehydrogenase 1, mitochondrial OS=Homo sapiens OX=9606 GN=GLUD1 PE=1 SV=2                                 | -0,124046874 | 1,464415 |
| P46776 | 60S ribosomal protein L27a OS=Homo sapiens OX=9606 GN=RPL27A PE=1 SV=2                                              | -0,272978364 | 1,463914 |
| Q5V725 | Serine/threonine-protein kinase MRCK alpha OS=Homo sapiens OX=9606 GN=CDC42BP2 PE=1 SV=1                            | -0,221277411 | 1,463152 |
| Q9BPX6 | Calcium uptake protein 1, mitochondrial OS=Homo sapiens OX=9606 GN=MICU1 PE=1 SV=1                                  | 0,318278276  | 1,463111 |
| Q9UKG1 | DCC-interacting protein 13-alpha OS=Homo sapiens OX=9606 GN=APPL1 PE=1 SV=1                                         | -0,318197756 | 1,462696 |
| O94887 | FERM, ARHGGEF and pleckstrin domain-containing protein 2 OS=Homo sapiens OX=9606 GN=FARP2 PE=1 SV=3                 | 0,655440828  | 1,461929 |
| O43252 | Bifunctional 3'-phosphoadenosine 5'-phosphosulfate synthase 1 OS=Homo sapiens OX=9606 GN=PAPSS1 PE=1 SV=2           | -0,134963565 | 1,461552 |
| Q9Y490 | Talin-1 OS=Homo sapiens OX=9606 GN=TLN1 PE=1 SV=3                                                                   | 0,05079805   | 1,460091 |
| Q9P2K5 | Myelin expression factor 2 OS=Homo sapiens OX=9606 GN=MYEF2 PE=1 SV=3                                               | 0,155729865  | 1,460032 |
| Q99729 | Heterogeneous nuclear ribonucleoprotein A/B OS=Homo sapiens OX=9606 GN=HNRNPAB PE=1 SV=2                            | -0,220880461 | 1,459968 |
| O43660 | Pleiotropic regulator 1 OS=Homo sapiens OX=9606 GN=PLRG1 PE=1 SV=1                                                  | -0,179684645 | 1,457673 |
| Q6DN12 | Multiple C2 and transmembrane domain-containing protein 2 OS=Homo sapiens OX=9606 GN=MCTP2 PE=1 SV=3                | -0,652515516 | 1,456791 |
| O14531 | Dihydropyrimidinase-related protein 4 OS=Homo sapiens OX=9606 GN=DPYSL4 PE=1 SV=2                                   | -0,203872716 | 1,456749 |
| Q99973 | Telomerase protein component 1 OS=Homo sapiens OX=9606 GN=TEP1 PE=1 SV=2                                            | 0,175848992  | 1,456031 |
| Q96PU8 | Protein quaking OS=Homo sapiens OX=9606 GN=QKI PE=1 SV=1                                                            | -0,24172482  | 1,454321 |
| P49257 | Protein ERGIC-53 OS=Homo sapiens OX=9606 GN=LMAN1 PE=1 SV=2                                                         | 0,162079824  | 1,453379 |
| Q96AX1 | Vacuolar protein sorting-associated protein 33A OS=Homo sapiens OX=9606 GN=VPS33A PE=1 SV=1                         | 0,219776053  | 1,45112  |
| Q9UKX7 | Nuclear pore complex protein Nup50 OS=Homo sapiens OX=9606 GN=NUP50 PE=1 SV=2                                       | -0,161824819 | 1,450511 |
| P18077 | 60S ribosomal protein L35a OS=Homo sapiens OX=9606 GN=RPL35A PE=1 SV=2                                              | -0,203141962 | 1,450351 |
| P07093 | Glia-derived nexin OS=Homo sapiens OX=9606 GN=SERPINE2 PE=1 SV=1                                                    | -0,189760371 | 1,449114 |
| Q96GC5 | 39S ribosomal protein L48, mitochondrial OS=Homo sapiens OX=9606 GN=MRPL48 PE=1 SV=2                                | -0,648028863 | 1,448882 |
| Q8WU76 | Sec1 family domain-containing protein 2 OS=Homo sapiens OX=9606 GN=SCFD2 PE=1 SV=2                                  | -0,513422543 | 1,447857 |
| P18084 | Integrin beta-5 OS=Homo sapiens OX=9606 GN=ITGB5 PE=1 SV=1                                                          | -0,315165677 | 1,447086 |
| Q72460 | CLIP-associating protein 1 OS=Homo sapiens OX=9606 GN=CLASP1 PE=1 SV=1                                              | 0,094681844  | 1,446077 |
| Q6P2C8 | Mediator of RNA polymerase II transcription subunit 27 OS=Homo sapiens OX=9606 GN=MED27 PE=1 SV=1                   | -0,646249271 | 1,445736 |
| Q9H330 | Transmembrane protein 245 OS=Homo sapiens OX=9606 GN=TMEM245 PE=1 SV=3                                              | -0,270058295 | 1,445661 |
| Q9NRW3 | DNA c->du-editing enzyme APOBEC-3C OS=Homo sapiens OX=9606 GN=APOBEC3C PE=1 SV=2                                    | 0,240353161  | 1,44447  |
| Q9NRG9 | Aladin OS=Homo sapiens OX=9606 GN=AAAS PE=1 SV=1                                                                    | -0,240342743 | 1,444396 |
| Q9Y678 | Coatomer subunit gamma-1 OS=Homo sapiens OX=9606 GN=COPG1 PE=1 SV=1                                                 | 0,07805525   | 1,443866 |
| Q9NRV9 | Heme-binding protein 1 OS=Homo sapiens OX=9606 GN=HEBP1 PE=1 SV=1                                                   | 0,202227757  | 1,442356 |
| P49721 | Proteasome subunit beta type-2 OS=Homo sapiens OX=9606 GN=PSMB2 PE=1 SV=1                                           | -0,154166116 | 1,44161  |
| P57772 | Selenocysteine-specific elongation factor OS=Homo sapiens OX=9606 GN=EEFSEC PE=1 SV=4                               | -0,3952722   | 1,440244 |
| Q9UPN4 | Centrosomal protein of 131 kDa OS=Homo sapiens OX=9606 GN=CPEP131 PE=1 SV=3                                         | 0,64214546   | 1,438461 |
| O14976 | Cyclin-G-associated kinase OS=Homo sapiens OX=9606 GN=GAK PE=1 SV=2                                                 | -0,201723926 | 1,437954 |
| Q9NUM4 | Transmembrane protein 106B OS=Homo sapiens OX=9606 GN=TMEM106B PE=1 SV=2                                            | -0,394660705 | 1,437944 |
| P25490 | Transcriptional repressor protein YY1 OS=Homo sapiens OX=9606 GN=YY1 PE=1 SV=2                                      | 0,313237074  | 1,437116 |
| P36915 | Guanine nucleotide-binding protein-like 1 OS=Homo sapiens OX=9606 GN=GNL1 PE=1 SV=2                                 | -0,2686768   | 1,437035 |
| Q9Y5P6 | Mannose-1-phosphate guanylyltransferase beta OS=Homo sapiens OX=9606 GN=GMPPB PE=1 SV=2                             | 0,313203292  | 1,436986 |
| Q13618 | Cullin-3 OS=Homo sapiens OX=9606 GN=CUL3 PE=1 SV=2                                                                  | 0,129186041  | 1,436774 |
| P39656 | Dolichyl-diphosphooligosaccharide--protein glycosyltransferase 48 kDa subunit OS=Homo sapiens OX=9606 GN=DDOST1     | 0,168367999  | 1,4358   |
| Q86WJ1 | Chromodomain-helicase-DNA-binding protein 1-like OS=Homo sapiens OX=9606 GN=CHD1L PE=1 SV=3                         | -0,640534767 | 1,435597 |
| Q9BT09 | Protein canopy homolog 3 OS=Homo sapiens OX=9606 GN=CNPY3 PE=1 SV=1                                                 | 0,201257087  | 1,433878 |
| Q9BV38 | WD repeat-containing protein 18 OS=Homo sapiens OX=9606 GN=WDR18 PE=1 SV=2                                          | -0,201157342 | 1,433008 |
| Q6ZMK1 | Cysteine and histidine-rich protein 1 OS=Homo sapiens OX=9606 GN=CYHR1 PE=1 SV=2                                    | -0,638279094 | 1,43158  |
| Q92503 | SEC14-like protein 1 OS=Homo sapiens OX=9606 GN=SEC14L1 PE=1 SV=2                                                   | -0,312136409 | 1,431496 |
| P28676 | Grancalcin OS=Homo sapiens OX=9606 GN=GCA PE=1 SV=2                                                                 | -0,238460544 | 1,430898 |
| P84243 | Histone H3.3 OS=Homo sapiens OX=9606 GN=H3F3A PE=1 SV=2                                                             | -0,311737661 | 1,429445 |
| Q96BH1 | E3 ubiquitin-protein ligase RNF25 OS=Homo sapiens OX=9606 GN=RNF25 PE=1 SV=1                                        | -0,311609274 | 1,428784 |
| P12956 | X-ray repair cross-complementing protein 6 OS=Homo sapiens OX=9606 GN=XRCC6 PE=1 SV=2                               | -0,090938736 | 1,427471 |
| A0AVT1 | Ubiquitin-like modifier-activating enzyme 6 OS=Homo sapiens OX=9606 GN=UBA6 PE=1 SV=1                               | 0,108149369  | 1,426561 |
| O14735 | CDP-diacylglycerol--inositol 3-phosphatidylyltransferase OS=Homo sapiens OX=9606 GN=CDIPT PE=1 SV=1                 | -0,391615989 | 1,426484 |
| O43674 | NADH dehydrogenase [ubiquinone] 1 beta subcomplex subunit 5, mitochondrial OS=Homo sapiens OX=9606 GN=NDUFB5        | -0,391093617 | 1,424517 |
| Q724H8 | Protein O-glucosyltransferase 3 OS=Homo sapiens OX=9606 GN=POGLUT3 PE=1 SV=2                                        | -0,152612342 | 1,423374 |
| Q3MHD2 | Protein LSM12 homolog OS=Homo sapiens OX=9606 GN=LSM12 PE=1 SV=2                                                    | -0,390540465 | 1,422433 |
| P56182 | Ribosomal RNA processing protein 1 homolog A OS=Homo sapiens OX=9606 GN=RRP1 PE=1 SV=1                              | -0,237089926 | 1,421084 |
| Q13630 | GDP-L-fucose synthase OS=Homo sapiens OX=9606 GN=TSTA3 PE=1 SV=1                                                    | -0,152414284 | 1,421054 |
| O00178 | GTP-binding protein 1 OS=Homo sapiens OX=9606 GN=GTPBP1 PE=1 SV=3                                                   | 0,632274664  | 1,420844 |
| Q16836 | Hydroxyacyl-coenzyme A dehydrogenase, mitochondrial OS=Homo sapiens OX=9606 GN=HADH PE=1 SV=3                       | -0,186684249 | 1,420167 |
| O95628 | CCR4-NOT transcription complex subunit 4 OS=Homo sapiens OX=9606 GN=CNOT4 PE=1 SV=3                                 | -0,306451978 | 1,419751 |
| Q15545 | Transcription initiation factor TFIID subunit 7 OS=Homo sapiens OX=9606 GN=TAIF7 PE=1 SV=1                          | 0,389767554  | 1,419352 |
| Q8NAV1 | Pre-mRNA-splicing factor 38A OS=Homo sapiens OX=9606 GN=PRPF38A PE=1 SV=1                                           | 0,309589019  | 1,418991 |
| O43379 | WD repeat-containing protein 62 OS=Homo sapiens OX=9606 GN=WDR62 PE=1 SV=4                                          | -0,265683711 | 1,418369 |
| P15529 | Membrane cofactor protein OS=Homo sapiens OX=9606 GN=CD46 PE=1 SV=3                                                 | -0,309259307 | 1,416695 |
| Q8NCN5 | Pyruvate dehydrogenase phosphatase regulatory subunit, mitochondrial OS=Homo sapiens OX=9606 GN=PDPR PE=1 SV=1      | 0,388997262  | 1,416617 |
| Q6N063 | 2-oxoglutarate and iron-dependent oxygenase domain-containing protein 2 OS=Homo sapiens OX=9606 GN=OGFOD2 PE=1 SV=2 | -0,571143284 | 1,41626  |
| Q14192 | Four and a half LIM domains protein 2 OS=Homo sapiens OX=9606 GN=FHL2 PE=1 SV=3                                     | 0,236369613  | 1,415931 |
| P49441 | Inositol polyphosphate 1-phosphatase OS=Homo sapiens OX=9606 GN=INPP1 PE=1 SV=1                                     | 0,308864915  | 1,414666 |
| P24534 | Elongation factor 1-beta OS=Homo sapiens OX=9606 GN=EEF1B2 PE=1 SV=3                                                | -0,15857006  | 1,414059 |
| Q15648 | Mediator of RNA polymerase II transcription subunit 1 OS=Homo sapiens OX=9606 GN=MED1 PE=1 SV=4                     | -0,235971198 | 1,413082 |
| Q12974 | Protein tyrosine phosphatase type IVA 2 OS=Homo sapiens OX=9606 GN=PTP4A2 PE=1 SV=1                                 | -0,627792351 | 1,41279  |
| Q6PI48 | Aspartate--tRNA ligase, mitochondrial OS=Homo sapiens OX=9606 GN=DARS2 PE=1 SV=1                                    | -0,198676734 | 1,411401 |
| Q96MW5 | Conserved oligomeric Golgi complex subunit 8 OS=Homo sapiens OX=9606 GN=COG8 PE=1 SV=2                              | 0,626936068  | 1,411248 |
| Q86WX3 | Active regulator of SIRT1 OS=Homo sapiens OX=9606 GN=RPS19BP1 PE=1 SV=1                                             | 0,125812761  | 1,411135 |
| O14730 | Serine/threonine-protein kinase RIO3 OS=Homo sapiens OX=9606 GN=RIO3 PE=1 SV=2                                      | -0,626659731 | 1,41075  |
| Q9UH65 | Switch-associated protein 70 OS=Homo sapiens OX=9606 GN=SWAP70 PE=1 SV=1                                            | 0,117408553  | 1,410586 |
| Q9BTC8 | Metastasis-associated protein MTA3 OS=Homo sapiens OX=9606 GN=MTA3 PE=1 SV=2                                        | -0,198449229 | 1,409423 |
| Q6ZTR5 | Cilia- and flagella-associated protein 47 OS=Homo sapiens OX=9606 GN=CFAP47 PE=2 SV=5                               | 0,314418398  | 1,408117 |
| Q86TB3 | Alpha-protein kinase 2 OS=Homo sapiens OX=9606 GN=ALPK2 PE=2 SV=3                                                   | 0,623975338  | 1,405904 |
| Q70UQ0 | Inhibitor of nuclear factor kappa-B kinase-interacting protein OS=Homo sapiens OX=9606 GN=IKBP PE=1 SV=1            | 0,151110564  | 1,405813 |
| Q8WWWQ | PH-interacting protein OS=Homo sapiens OX=9606 GN=PHIP PE=1 SV=2                                                    | -0,091582223 | 1,405447 |
| P13591 | Neural cell adhesion molecule 1 OS=Homo sapiens OX=9606 GN=NCAM1 PE=1 SV=3                                          | 0,385636406  | 1,403937 |
| Q12866 | Tyrosine-protein kinase Mer OS=Homo sapiens OX=9606 GN=MERTK PE=1 SV=2                                              | 0,741698214  | 1,401925 |
| Q9NV06 | DDB1- and CUL4-associated factor 13 OS=Homo sapiens OX=9606 GN=DCAF13 PE=1 SV=2                                     | -0,621759796 | 1,401896 |
| Q5HYI7 | Metaxin-3 OS=Homo sapiens OX=9606 GN=MTX3 PE=1 SV=2                                                                 | -0,880018908 | 1,401727 |
| Q8NCX0 | Coiled-coil domain-containing protein 150 OS=Homo sapiens OX=9606 GN=CCDC150 PE=1 SV=2                              | 0,447675557  | 1,40087  |
| Q9Y3Z3 | Deoxynucleoside triphosphate triphosphohydrolase SAMHD1 OS=Homo sapiens OX=9606 GN=SAMHD1 PE=1 SV=2                 | 0,165049862  | 1,400606 |
| O43301 | Heat shock 70 kDa protein 12A OS=Homo sapiens OX=9606 GN=HSPA12A PE=1 SV=2                                          | 0,213383197  | 1,400127 |

|         |                                                                                                                  |              |          |
|---------|------------------------------------------------------------------------------------------------------------------|--------------|----------|
| O43172  | U4/U6 small nuclear ribonucleoprotein Prp4 OS=Homo sapiens OX=9606 GN=PRPF4 PE=1 SV=2                            | 0,13943883   | 1,399848 |
| Q8NHG7  | Small VCP/p97-interacting protein OS=Homo sapiens OX=9606 GN=SVIP PE=1 SV=1                                      | -0,069323807 | 1,398348 |
| P31327  | Carbamoyl-phosphate synthase [ammonia], mitochondrial OS=Homo sapiens OX=9606 GN=CPS1 PE=1 SV=2                  | -0,383883486 | 1,397318 |
| P26885  | Peptidyl-prolyl cis-trans isomerase FKBP2 OS=Homo sapiens OX=9606 GN=FKBP2 PE=1 SV=2                             | 0,383865674  | 1,39725  |
| Q02447  | Transcription factor Sp3 OS=Homo sapiens OX=9606 GN=SP3 PE=1 SV=3                                                | -0,619170791 | 1,397201 |
| O94760  | N(G),N(G)-dimethylarginine dimethylaminohydrolase 1 OS=Homo sapiens OX=9606 GN=DDAH1 PE=1 SV=3                   | 0,233641604  | 1,396646 |
| Q16587  | Zinc finger protein 74 OS=Homo sapiens OX=9606 GN=ZNF74 PE=1 SV=3                                                | -0,618648498 | 1,396253 |
| P22234  | Multifunctional protein ADE2 OS=Homo sapiens OX=9606 GN=PAICS PE=1 SV=3                                          | -0,119396641 | 1,394905 |
| Q8WU20  | B-cell CLL/lymphoma 7 protein family member C OS=Homo sapiens OX=9606 GN=BCL7C PE=1 SV=3                         | -0,617699873 | 1,394529 |
| Q6AI08  | HEAT repeat-containing protein 6 OS=Homo sapiens OX=9606 GN=HEATR6 PE=1 SV=1                                     | 0,261643968  | 1,393226 |
| A8MXV4  | Nucleoside diphosphate-linked moiety X motif 19 OS=Homo sapiens OX=9606 GN=NUDT19 PE=1 SV=1                      | -0,261563837 | 1,392728 |
| Q8WX92  | Negative elongation factor B OS=Homo sapiens OX=9606 GN=NELFB PE=1 SV=1                                          | -0,19639346  | 1,391582 |
| Q5VVK3  | Proteasome adapter and scaffold protein ECM29 OS=Homo sapiens OX=9606 GN=ECPAS PE=1 SV=2                         | -0,085449045 | 1,391173 |
| Q16543  | Hsp90 co-chaperone Cdc37 OS=Homo sapiens OX=9606 GN=CDC37 PE=1 SV=1                                              | -0,138606551 | 1,389331 |
| P56524  | Histone deacetylase 4 OS=Homo sapiens OX=9606 GN=HDAC4 PE=1 SV=3                                                 | -0,434589554 | 1,388586 |
| Q9BZQ6  | ER degradation-enhancing alpha-mannosidase-like protein 3 OS=Homo sapiens OX=9606 GN=EDEM3 PE=1 SV=2             | -0,447078773 | 1,388557 |
| Q14318  | Peptidyl-prolyl cis-trans isomerase FKBP8 OS=Homo sapiens OX=9606 GN=FKBP8 PE=1 SV=2                             | -0,18320797  | 1,387636 |
| P00568  | Adenylate kinase isoenzyme 1 OS=Homo sapiens OX=9606 GN=AK1 PE=1 SV=3                                            | -0,149527382 | 1,387371 |
| Q13029  | PR domain zinc finger protein 2 OS=Homo sapiens OX=9606 GN=PRDM2 PE=1 SV=3                                       | -0,969676006 | 1,386804 |
| O75155  | Cullin-associated NEDD8-dissociated protein 2 OS=Homo sapiens OX=9606 GN=CAND2 PE=1 SV=3                         | -0,498531209 | 1,385601 |
| Q9UIW2  | Plexin-A1 OS=Homo sapiens OX=9606 GN=PLXNA1 PE=1 SV=3                                                            | -0,380731546 | 1,385403 |
| Q13409  | Cytoplasmic dynein 1 intermediate chain 2 OS=Homo sapiens OX=9606 GN=DYNC1I2 PE=1 SV=3                           | 0,143486138  | 1,385159 |
| P21283  | V-type proton ATPase subunit C 1 OS=Homo sapiens OX=9606 GN=ATP6V1C1 PE=1 SV=4                                   | -0,172439146 | 1,385078 |
| Q6IA69  | Glutamine-dependent NAD(+) synthetase OS=Homo sapiens OX=9606 GN=NADSYN1 PE=1 SV=3                               | -0,380633663 | 1,385033 |
| O75323  | Protein NipSnap homolog 2 OS=Homo sapiens OX=9606 GN=NIPSNAP2 PE=1 SV=1                                          | -0,260175184 | 1,384099 |
| O75533  | Splicing factor 3B subunit 1 OS=Homo sapiens OX=9606 GN=SF3B1 PE=1 SV=3                                          | -0,07106877  | 1,382376 |
| Q15631  | Translin OS=Homo sapiens OX=9606 GN=TSN PE=1 SV=1                                                                | 0,172149211  | 1,382194 |
| Q13464  | Rho-associated protein kinase 1 OS=Homo sapiens OX=9606 GN=ROCK1 PE=1 SV=1                                       | 0,121740154  | 1,381658 |
| Q14671  | Pumilio homolog 1 OS=Homo sapiens OX=9606 GN=PUM1 PE=1 SV=3                                                      | 0,195239089  | 1,381588 |
| O43768  | Alpha-endosulfine OS=Homo sapiens OX=9606 GN=ENSA PE=1 SV=1                                                      | -0,182438391 | 1,38046  |
| Q6UWP7  | Lysocardiolipin acyltransferase 1 OS=Homo sapiens OX=9606 GN=LCLAT1 PE=1 SV=1                                    | -0,302162294 | 1,380209 |
| Q13206  | Probable ATP-dependent RNA helicase DDX10 OS=Homo sapiens OX=9606 GN=DDX10 PE=1 SV=2                             | 0,15661782   | 1,377904 |
| O75044  | SLIT-ROBO Rho GTPase-activating protein 2 OS=Homo sapiens OX=9606 GN=SRGAP2 PE=1 SV=3                            | -0,182114579 | 1,377444 |
| Q9NRR5  | Ubiquitin-4 OS=Homo sapiens OX=9606 GN=UBQLN4 PE=1 SV=2                                                          | 0,194574896  | 1,375845 |
| P18440  | Arylamine N-acetyltransferase 1 OS=Homo sapiens OX=9606 GN=NAT1 PE=1 SV=2                                        | 0,750585726  | 1,375675 |
| P40939  | Trifunctional enzyme subunit alpha, mitochondrial OS=Homo sapiens OX=9606 GN=HADHA PE=1 SV=2                     | -0,092475519 | 1,37484  |
| Q8ND90  | Paraneoplastic antigen Ma1 OS=Homo sapiens OX=9606 GN=PNMA1 PE=1 SV=2                                            | -0,377854011 | 1,374507 |
| Q9Y5B9  | FACT complex subunit SPT16 OS=Homo sapiens OX=9606 GN=SUPT16H PE=1 SV=1                                          | -0,097271807 | 1,374507 |
| Q6ZS11  | Ras and Rab interactor-like protein OS=Homo sapiens OX=9606 GN=RINL PE=2 SV=2                                    | -0,605725119 | 1,372633 |
| Q9H993  | Damage-control phosphatase ARMT1 OS=Homo sapiens OX=9606 GN=ARMT1 PE=1 SV=1                                      | -0,181564387 | 1,372323 |
| Q13330  | Metastasis-associated protein MTA1 OS=Homo sapiens OX=9606 GN=MTA1 PE=1 SV=2                                     | -0,377085341 | 1,371602 |
| P68036  | Ubiquitin-conjugating enzyme E2 L3 OS=Homo sapiens OX=9606 GN=UBE2L3 PE=1 SV=1                                   | -0,230149732 | 1,371578 |
| O00541  | Pescadillo homolog OS=Homo sapiens OX=9606 GN=PES1 PE=1 SV=1                                                     | -0,154725093 | 1,371344 |
| Q9BTE6  | Alanyl-tRNA editing protein Aarsd1 OS=Homo sapiens OX=9606 GN=AARSD1 PE=1 SV=2                                   | -0,258117358 | 1,371325 |
| O43678  | NADH dehydrogenase [ubiquinone] 1 alpha subcomplex subunit 2 OS=Homo sapiens OX=9606 GN=NDUFA2 PE=1 SV=3         | -0,376993671 | 1,371255 |
| Q16644  | MAP kinase-activated protein kinase 3 OS=Homo sapiens OX=9606 GN=MAPKAPK3 PE=1 SV=1                              | -0,768035105 | 1,369722 |
| Q9NRR4  | Ribonuclease 3 OS=Homo sapiens OX=9606 GN=DROSHA PE=1 SV=2                                                       | -0,232549624 | 1,369607 |
| Q14197  | Peptidyl-tRNA hydrolase ICT1, mitochondrial OS=Homo sapiens OX=9606 GN=MRPL58 PE=1 SV=1                          | -0,603807437 | 1,369103 |
| Q9UPZ3  | Hermansky-Pudlak syndrome 5 protein OS=Homo sapiens OX=9606 GN=HPS5 PE=1 SV=2                                    | -0,603108421 | 1,367815 |
| Q9NXX8  | F-box/LRR-repeat protein 12 OS=Homo sapiens OX=9606 GN=FBXL12 PE=1 SV=1                                          | -0,602897746 | 1,367426 |
| Q9H2K8  | Serine/threonine-protein kinase TAO3 OS=Homo sapiens OX=9606 GN=TAOK3 PE=1 SV=2                                  | 0,60260352   | 1,366884 |
| Q9NVX2  | Notchless protein homolog 1 OS=Homo sapiens OX=9606 GN=NLE1 PE=1 SV=4                                            | -0,144915709 | 1,366326 |
| Q9NQG5  | Regulation of nuclear pre-mRNA domain-containing protein 1B OS=Homo sapiens OX=9606 GN=RPRD1B PE=1 SV=1          | 0,22939714   | 1,366228 |
| Q9Y287  | Integral membrane protein 2B OS=Homo sapiens OX=9606 GN=ITM2B PE=1 SV=1                                          | 0,601948039  | 1,365674 |
| Q14694  | Ubiquitin carboxyl-terminal hydrolase 10 OS=Homo sapiens OX=9606 GN=USP10 PE=1 SV=2                              | -0,124086825 | 1,36532  |
| P52179  | Myomesin-1 OS=Homo sapiens OX=9606 GN=MYOM1 PE=1 SV=2                                                            | -0,601585804 | 1,365006 |
| P53597  | Succinate--CoA ligase [ADP/GDP-forming] subunit alpha, mitochondrial OS=Homo sapiens OX=9606 GN=SUCLG1 PE=1 SV=1 | -0,193208118 | 1,364046 |
| O14949  | Cytochrome b-c1 complex subunit 8 OS=Homo sapiens OX=9606 GN=UQCRCQ PE=1 SV=4                                    | -0,298996032 | 1,363945 |
| Q9BS16  | Centromere protein K OS=Homo sapiens OX=9606 GN=CENPK PE=1 SV=1                                                  | -0,600546777 | 1,363086 |
| Q6S193  | Protein FAM111B OS=Homo sapiens OX=9606 GN=FAM111B PE=1 SV=1                                                     | -0,599527161 | 1,361201 |
| P16157  | Ankyrin-1 OS=Homo sapiens OX=9606 GN=ANK1 PE=1 SV=3                                                              | 0,136352604  | 1,360972 |
| P78344  | Eukaryotic translation initiation factor 4 gamma 2 OS=Homo sapiens OX=9606 GN=EIF4G2 PE=1 SV=1                   | 0,087600221  | 1,360699 |
| Q9BRR6  | ADP-dependent glucokinase OS=Homo sapiens OX=9606 GN=ADPGK PE=1 SV=1                                             | 0,208391968  | 1,360589 |
| Q9NWWZ5 | Uridine-cytidine kinase-like 1 OS=Homo sapiens OX=9606 GN=UCKL1 PE=1 SV=2                                        | -0,38854237  | 1,360081 |
| P41743  | Protein kinase C iota type OS=Homo sapiens OX=9606 GN=PRKI PE=1 SV=2                                             | -0,140203572 | 1,359976 |
| Q13685  | Angio-associated migratory cell protein OS=Homo sapiens OX=9606 GN=AAMP PE=1 SV=2                                | -0,256198503 | 1,359427 |
| P61586  | Transforming protein RhoA OS=Homo sapiens OX=9606 GN=RHOA PE=1 SV=1                                              | 0,208185252  | 1,358957 |
| P08236  | Beta-glucuronidase OS=Homo sapiens OX=9606 GN=GUSB PE=1 SV=2                                                     | -0,598313476 | 1,358955 |
| Q12849  | G-rich sequence factor 1 OS=Homo sapiens OX=9606 GN=GRSF1 PE=1 SV=3                                              | -0,192578763 | 1,358621 |
| Q9NSE4  | Isoleucine--tRNA ligase, mitochondrial OS=Homo sapiens OX=9606 GN=IARS2 PE=1 SV=2                                | -0,091616733 | 1,358566 |
| Q9BT88  | Synaptotagmin-11 OS=Homo sapiens OX=9606 GN=SYT11 PE=1 SV=2                                                      | 0,597690414  | 1,3578   |
| Q15147  | 1-phosphatidylinositol 4,5-bisphosphate phosphodiesterase beta-4 OS=Homo sapiens OX=9606 GN=PLCB4 PE=1 SV=3      | 0,131468902  | 1,357421 |
| Q9BU14  | DNA-directed RNA polymerase III subunit RPC3 OS=Homo sapiens OX=9606 GN=POLR3C PE=1 SV=1                         | 0,595022072  | 1,356829 |
| Q8NHQ1  | Centrosomal protein of 70 kDa OS=Homo sapiens OX=9606 GN=CEP70 PE=1 SV=2                                         | -0,368586004 | 1,356662 |
| Q14145  | Kelch-like ECH-associated protein 1 OS=Homo sapiens OX=9606 GN=KEAP1 PE=1 SV=2                                   | 0,081996301  | 1,356111 |
| Q13509  | Tubulin beta-3 chain OS=Homo sapiens OX=9606 GN=TUBB3 PE=1 SV=2                                                  | -0,135946103 | 1,355877 |
| P23284  | Peptidyl-prolyl cis-trans isomerase B OS=Homo sapiens OX=9606 GN=PPIB PE=1 SV=2                                  | 0,141001     | 1,355125 |
| Q72627  | E3 ubiquitin-protein ligase HUWE1 OS=Homo sapiens OX=9606 GN=HUWE1 PE=1 SV=3                                     | -0,055272456 | 1,355001 |
| Q96KP4  | Cytosolic non-specific dipeptidase OS=Homo sapiens OX=9606 GN=CNDP2 PE=1 SV=2                                    | 0,116691585  | 1,354981 |
| Q92629  | Delta-sarcoglycan OS=Homo sapiens OX=9606 GN=SGCD PE=1 SV=2                                                      | -1,187119759 | 1,354808 |
| O75616  | GTPase Era, mitochondrial OS=Homo sapiens OX=9606 GN=ERAL1 PE=1 SV=2                                             | -0,386156349 | 1,354748 |
| Q13823  | Nucleolar GTP-binding protein 2 OS=Homo sapiens OX=9606 GN=GNL2 PE=1 SV=1                                        | -0,255320795 | 1,353399 |
| O75586  | Mediator of RNA polymerase II transcription subunit 6 OS=Homo sapiens OX=9606 GN=MED6 PE=1 SV=2                  | 0,595415782  | 1,353558 |
| Q9NRX2  | 39S ribosomal protein L17, mitochondrial OS=Homo sapiens OX=9606 GN=MRPL17 PE=1 SV=1                             | -0,296807079 | 1,352707 |
| P68400  | Casein kinase II subunit alpha OS=Homo sapiens OX=9606 GN=CSNK2A1 PE=1 SV=1                                      | 0,146420746  | 1,351393 |
| Q27AA2  | Isoamyl acetate-hydrolyzing esterase 1 homolog OS=Homo sapiens OX=9606 GN=IAH1 PE=1 SV=1                         | 0,594127377  | 1,351186 |
| P61764  | Syntaxin-binding protein 1 OS=Homo sapiens OX=9606 GN=STXB1 PE=1 SV=1                                            | 0,152897132  | 1,351169 |
| Q9H0B6  | Kinesin light chain 2 OS=Homo sapiens OX=9606 GN=KLC2 PE=1 SV=1                                                  | -0,146311718 | 1,350136 |
| Q9H0H0  | Integrator complex subunit 2 OS=Homo sapiens OX=9606 GN=INTS2 PE=1 SV=2                                          | 0,370765405  | 1,347638 |
| Q96GD4  | Aurora kinase B OS=Homo sapiens OX=9606 GN=AURKB PE=1 SV=3                                                       | -0,295792216 | 1,347498 |
| Q72478  | ATP-dependent RNA helicase DHX29 OS=Homo sapiens OX=9606 GN=DHX29 PE=1 SV=2                                      | -0,107855131 | 1,345241 |

|         |                                                                                                                  |              |          |
|---------|------------------------------------------------------------------------------------------------------------------|--------------|----------|
| P08758  | Annexin A5 OS=Homo sapiens OX=9606 GN=ANXA5 PE=1 SV=2                                                            | 0,105467042  | 1,344828 |
| P48637  | Glutathione synthetase OS=Homo sapiens OX=9606 GN=GSS PE=1 SV=1                                                  | 0,113069545  | 1,344778 |
| Q9Y2V7  | Conserved oligomeric Golgi complex subunit 6 OS=Homo sapiens OX=9606 GN=COG6 PE=1 SV=2                           | 0,286391542  | 1,343764 |
| Q16555  | Dihydropyrimidinase-related protein 2 OS=Homo sapiens OX=9606 GN=DPYSL2 PE=1 SV=1                                | 0,097216972  | 1,342177 |
| Q8NHP6  | Motile sperm domain-containing protein 2 OS=Homo sapiens OX=9606 GN=MOSPD2 PE=1 SV=1                             | 0,190612868  | 1,341709 |
| Q6AWC8  | Putative uncharacterized protein LOC100129027 OS=Homo sapiens OX=9606 PE=5 SV=1                                  | 0,486142055  | 1,34103  |
| Q96GM8  | Target of EGR1 protein 1 OS=Homo sapiens OX=9606 GN=TOE1 PE=1 SV=1                                               | -0,368997311 | 1,340924 |
| Q14914  | Prostaglandin reductase 1 OS=Homo sapiens OX=9606 GN=PTGR1 PE=1 SV=2                                             | 0,588453842  | 1,340608 |
| P35249  | Replication factor C subunit 4 OS=Homo sapiens OX=9606 GN=RFC4 PE=1 SV=2                                         | -0,190482296 | 1,340587 |
| Q8N3T6  | Transmembrane protein 132C OS=Homo sapiens OX=9606 GN=TMEM132C PE=2 SV=3                                         | -0,900642479 | 1,340517 |
| Q16718  | NADH dehydrogenase [ubiquinone] 1 alpha subcomplex subunit 5 OS=Homo sapiens OX=9606 GN=NDUFA5 PE=1 SV=3         | 0,253135833  | 1,340468 |
| Q9BTD8  | RNA-binding protein 42 OS=Homo sapiens OX=9606 GN=RBM42 PE=1 SV=1                                                | 0,36872923   | 1,339905 |
| P30837  | Aldehyde dehydrogenase X, mitochondrial OS=Homo sapiens OX=9606 GN=ALDH1B1 PE=1 SV=3                             | -0,205737242 | 1,339661 |
| Q96A72  | Protein mago nashi homolog 2 OS=Homo sapiens OX=9606 GN=MAGOHB PE=1 SV=1                                         | -1,085290337 | 1,339422 |
| Q9BYD2  | 39S ribosomal protein L9, mitochondrial OS=Homo sapiens OX=9606 GN=MRPL9 PE=1 SV=2                               | -0,368564629 | 1,33928  |
| Q6P1L8  | 39S ribosomal protein L14, mitochondrial OS=Homo sapiens OX=9606 GN=MRPL14 PE=1 SV=1                             | -0,252780489 | 1,33827  |
| Q8WWI5  | Choline transporter-like protein 1 OS=Homo sapiens OX=9606 GN=SLC44A1 PE=1 SV=1                                  | -0,587006283 | 1,3379   |
| Q9NVE5  | Ubiquitin carboxyl-terminal hydrolase 40 OS=Homo sapiens OX=9606 GN=USP40 PE=1 SV=3                              | -0,586919016 | 1,337736 |
| Q96DV4  | 39S ribosomal protein L38, mitochondrial OS=Homo sapiens OX=9606 GN=MRPL38 PE=1 SV=2                             | -0,225236369 | 1,33672  |
| Q8TES7  | Fas-binding factor 1 OS=Homo sapiens OX=9606 GN=FBF1 PE=1 SV=2                                                   | -0,586374918 | 1,336717 |
| Q5CZC0  | Fibrous sheath-interacting protein 2 OS=Homo sapiens OX=9606 GN=FSIP2 PE=2 SV=4                                  | -0,173058506 | 1,335478 |
| Q86WB0  | Nuclear-interacting partner of ALK OS=Homo sapiens OX=9606 GN=ZC3HC1 PE=1 SV=1                                   | 0,252304937  | 1,33533  |
| Q12874  | Splicing factor 3A subunit 3 OS=Homo sapiens OX=9606 GN=SF3A3 PE=1 SV=1                                          | 0,129696969  | 1,334457 |
| Q9NUY8  | TBC1 domain family member 23 OS=Homo sapiens OX=9606 GN=TBC1D23 PE=1 SV=3                                        | 0,224910247  | 1,334418 |
| P63165  | Small ubiquitin-related modifier 1 OS=Homo sapiens OX=9606 GN=SUMO1 PE=1 SV=1                                    | -0,251882683 | 1,332711 |
| Q75792  | Ribonuclease H2 subunit A OS=Homo sapiens OX=9606 GN=RNASEH2A PE=1 SV=2                                          | -0,292885409 | 1,332585 |
| Q6ZRY4  | RNA-binding protein with multiple splicing 2 OS=Homo sapiens OX=9606 GN=RBPMS2 PE=1 SV=1                         | -0,583672917 | 1,331649 |
| Q8IY52  | Uncharacterized protein KIAA2013 OS=Homo sapiens OX=9606 GN=KIAA2013 PE=1 SV=1                                   | -0,583447808 | 1,331226 |
| P78536  | Disintegrin and metalloproteinase domain-containing protein 17 OS=Homo sapiens OX=9606 GN=ADAM17 PE=1 SV=1       | 0,292606051  | 1,331152 |
| Q9BU0E  | Mediator of RNA polymerase II transcription subunit 18 OS=Homo sapiens OX=9606 GN=MED18 PE=1 SV=1                | 0,548854219  | 1,330393 |
| Q9BTFM9 | Ubiquitin-related modifier 1 OS=Homo sapiens OX=9606 GN=URM1 PE=1 SV=1                                           | -0,366224172 | 1,330385 |
| Q75369  | Filamin-B OS=Homo sapiens OX=9606 GN=FLNB PE=1 SV=2                                                              | -0,044373755 | 1,328843 |
| Q7L0J3  | Synaptic vesicle glycoprotein 2A OS=Homo sapiens OX=9606 GN=SV2A PE=1 SV=1                                       | -0,581595672 | 1,327744 |
| Q03518  | Antigen peptide transporter 1 OS=Homo sapiens OX=9606 GN=TAP1 PE=1 SV=2                                          | 0,223951683  | 1,327641 |
| Q9BZE4  | Nucleolar GTP-binding protein 1 OS=Homo sapiens OX=9606 GN=GTPBP4 PE=1 SV=3                                      | -0,114790254 | 1,327144 |
| Q9NRX1  | RNA-binding protein PNO1 OS=Homo sapiens OX=9606 GN=PNO1 PE=1 SV=1                                               | -0,250903804 | 1,326673 |
| Q5T160  | Probable arginine-tRNA ligase, mitochondrial OS=Homo sapiens OX=9606 GN=RARS2 PE=1 SV=1                          | 0,8411369    | 1,326669 |
| P49753  | Acyl-coenzyme A thioesterase 2, mitochondrial OS=Homo sapiens OX=9606 GN=ACOT2 PE=1 SV=6                         | -0,580685542 | 1,326031 |
| Q9NRX4  | 14 kDa phosphohistidine phosphatase OS=Homo sapiens OX=9606 GN=PHPT1 PE=1 SV=1                                   | 0,203968153  | 1,325753 |
| Q09161  | Nuclear cap-binding protein subunit 1 OS=Homo sapiens OX=9606 GN=NCBP1 PE=1 SV=1                                 | 0,109111253  | 1,325641 |
| P35221  | Catenin alpha-1 OS=Homo sapiens OX=9606 GN=CTNNA1 PE=1 SV=1                                                      | 0,077216473  | 1,325053 |
| P43490  | Nicotinamide phosphoribosyltransferase OS=Homo sapiens OX=9606 GN=NAMPT PE=1 SV=1                                | 0,12882647   | 1,323219 |
| P55854  | Small ubiquitin-related modifier 3 OS=Homo sapiens OX=9606 GN=SUMO3 PE=1 SV=2                                    | -0,578939845 | 1,32274  |
| Q95825  | Quinone oxidoreductase-like protein 1 OS=Homo sapiens OX=9606 GN=CRYZL1 PE=1 SV=2                                | 0,203371666  | 1,321071 |
| Q5VIR6  | Vacuolar protein sorting-associated protein 53 homolog OS=Homo sapiens OX=9606 GN=VPS53 PE=1 SV=1                | 0,203340376  | 1,320826 |
| Q9Y305  | Acyl-coenzyme A thioesterase 9, mitochondrial OS=Homo sapiens OX=9606 GN=ACOT9 PE=1 SV=2                         | -0,111432686 | 1,320219 |
| Q9NVU0  | DNA-directed RNA polymerase III subunit RPC5 OS=Homo sapiens OX=9606 GN=POLR3E PE=1 SV=1                         | -0,107584089 | 1,319995 |
| Q9NV96  | Cell cycle control protein 50A OS=Homo sapiens OX=9606 GN=TMEM30A PE=1 SV=1                                      | -0,362996189 | 1,318105 |
| Q9H4A3  | Serine/threonine-protein kinase WNK1 OS=Homo sapiens OX=9606 GN=WNK1 PE=1 SV=2                                   | -0,362894774 | 1,317719 |
| Q86WAB8 | Lon protease homolog 2, peroxisomal OS=Homo sapiens OX=9606 GN=LONP2 PE=1 SV=1                                   | -0,362808877 | 1,317392 |
| P49773  | Histidine triad nucleotide-binding protein 1 OS=Homo sapiens OX=9606 GN=HINT1 PE=1 SV=2                          | 0,17559048   | 1,317034 |
| Q94856  | Neurofascin OS=Homo sapiens OX=9606 GN=NFASC PE=1 SV=4                                                           | 0,36267882   | 1,316897 |
| Q9NS91  | E3 ubiquitin-protein ligase RAD18 OS=Homo sapiens OX=9606 GN=RAD18 PE=1 SV=2                                     | -0,128333858 | 1,316873 |
| Q00610  | Clathrin heavy chain 1 OS=Homo sapiens OX=9606 GN=CLTC PE=1 SV=5                                                 | -0,051958612 | 1,316775 |
| Q86YS6  | Ras-related protein Rab-43 OS=Homo sapiens OX=9606 GN=RAB43 PE=1 SV=1                                            | -0,24926972  | 1,316587 |
| Q9H3P7  | Golgi resident protein GCP60 OS=Homo sapiens OX=9606 GN=ACBD3 PE=1 SV=4                                          | 0,137639595  | 1,314817 |
| P63104  | 14-3-3 protein zeta/delta OS=Homo sapiens OX=9606 GN=YWHAZ PE=1 SV=1                                             | 0,105898332  | 1,314423 |
| Q13510  | Acid ceramidase OS=Homo sapiens OX=9606 GN=ASAH1 PE=1 SV=5                                                       | -0,187305659 | 1,313373 |
| Q8IU66  | Histone H2A type 2-B OS=Homo sapiens OX=9606 GN=HIST2H2AB PE=1 SV=3                                              | -0,289088462 | 1,313119 |
| Q6NKR4  | TELO2-interacting protein 2 OS=Homo sapiens OX=9606 GN=TTI2 PE=1 SV=1                                            | -0,573578122 | 1,312599 |
| Q5H9R7  | Serine/threonine-protein phosphatase 6 regulatory subunit 3 OS=Homo sapiens OX=9606 GN=PPP6R3 PE=1 SV=2          | -0,105711278 | 1,311149 |
| P62633  | Cellular nucleic acid-binding protein OS=Homo sapiens OX=9606 GN=CNBP PE=1 SV=1                                  | 0,202006075  | 1,310366 |
| Q16775  | Hydroxyacylglutathione hydrolase, mitochondrial OS=Homo sapiens OX=9606 GN=HAGH PE=1 SV=2                        | -0,156199639 | 1,307946 |
| Q75251  | NADH dehydrogenase [ubiquinone] iron-sulfur protein 7, mitochondrial OS=Homo sapiens OX=9606 GN=NDUFS7 PE=1 SV=1 | -0,288042231 | 1,307758 |
| Q00303  | Eukaryotic translation initiation factor 3 subunit F OS=Homo sapiens OX=9606 GN=EIF3F PE=1 SV=1                  | 0,136711912  | 1,307358 |
| Q00267  | Transcription elongation factor SPT5 OS=Homo sapiens OX=9606 GN=SUPT5H PE=1 SV=1                                 | -0,098662883 | 1,302645 |
| Q15162  | Phospholipid scramblase 1 OS=Homo sapiens OX=9606 GN=PLSCR1 PE=1 SV=1                                            | -0,568167868 | 1,302313 |
| Q43837  | Isocitrate dehydrogenase [NAD] subunit beta, mitochondrial OS=Homo sapiens OX=9606 GN=IDH3B PE=1 SV=2            | 0,173930633  | 1,301777 |
| P0DPH7  | Tubulin alpha-3C chain OS=Homo sapiens OX=9606 GN=TUBA3C PE=1 SV=1                                               | 0,091577473  | 1,301646 |
| Q9BSC4  | Nucleolar protein 10 OS=Homo sapiens OX=9606 GN=NOL10 PE=1 SV=1                                                  | -0,567560824 | 1,301155 |
| Q9BQA9  | Cytochrome b-245 chaperone 1 OS=Homo sapiens OX=9606 GN=CYBC1 PE=1 SV=1                                          | 0,286669906  | 1,300728 |
| Q8NGY2  | Leucine-rich repeat-containing protein 17 OS=Homo sapiens OX=9606 GN=LRRC17 PE=2 SV=1                            | 0,116043165  | 1,300557 |
| Q6NUM9  | All-trans-retinol 13,14-reductase OS=Homo sapiens OX=9606 GN=RETSAT PE=1 SV=2                                    | -0,16381881  | 1,300028 |
| Q9BUJ0  | EF-hand domain-containing protein D1 OS=Homo sapiens OX=9606 GN=EFHD1 PE=1 SV=1                                  | -0,358057913 | 1,299295 |
| P43897  | Elongation factor Ts, mitochondrial OS=Homo sapiens OX=9606 GN=TSFM PE=1 SV=2                                    | -0,185652743 | 1,299266 |
| P26641  | Elongation factor 1-gamma OS=Homo sapiens OX=9606 GN=EEF1G PE=1 SV=3                                             | -0,09473651  | 1,298884 |
| Q9ULE0  | Protein WWC3 OS=Homo sapiens OX=9606 GN=WWC3 PE=1 SV=3                                                           | -1,278818677 | 1,298727 |
| Q15533  | Tapasin OS=Homo sapiens OX=9606 GN=TAPBP PE=1 SV=1                                                               | -0,566219054 | 1,298595 |
| Q9HAU5  | Regulator of nonsense transcripts 2 OS=Homo sapiens OX=9606 GN=UPF2 PE=1 SV=1                                    | 0,357771118  | 1,298201 |
| Q75569  | Interferon-inducible double-stranded RNA-dependent protein kinase activator A OS=Homo sapiens OX=9606 GN=PRKRA F | 0,286110844  | 1,297865 |
| Q53EP0  | Fibronectin type III domain-containing protein 3B OS=Homo sapiens OX=9606 GN=FNDC3B PE=1 SV=2                    | 0,185452035  | 1,297556 |
| Q75747  | Phosphatidylinositol 4-phosphate 3-kinase C2 domain-containing subunit gamma OS=Homo sapiens OX=9606 GN=PIK3C2   | -0,280604009 | 1,296487 |
| Q04323  | UBX domain-containing protein 1 OS=Homo sapiens OX=9606 GN=UBXN1 PE=1 SV=2                                       | 0,173346356  | 1,296147 |
| Q95232  | Luc7-like protein 3 OS=Homo sapiens OX=9606 GN=LUC7L3 PE=1 SV=2                                                  | 0,147695038  | 1,294231 |
| Q14966  | Ras-related protein Rab-7L1 OS=Homo sapiens OX=9606 GN=RAB29 PE=1 SV=1                                           | 0,564049018  | 1,293582 |
| Q14061  | Cytochrome c oxidase copper chaperone OS=Homo sapiens OX=9606 GN=COX17 PE=1 SV=2                                 | 0,194684132  | 1,292696 |
| Q9Y3A3  | MOB-like protein phocein OS=Homo sapiens OX=9606 GN=MOB4 PE=1 SV=1                                               | 0,285024433  | 1,292302 |
| Q12923  | Tyrosine-protein phosphatase non-receptor type 13 OS=Homo sapiens OX=9606 GN=PTPN13 PE=1 SV=2                    | -0,223175659 | 1,29156  |
| Q96A9   | Vesicle transport through interaction with t-SNAREs homolog 1A OS=Homo sapiens OX=9606 GN=VTI1A PE=1 SV=2        | 0,506455471  | 1,290819 |
| Q9NVU7  | Protein SDA1 homolog OS=Homo sapiens OX=9606 GN=SDAD1 PE=1 SV=3                                                  | -0,283873899 | 1,286413 |
| A6NHX0  | Cytosolic arginine sensor for mTORC1 subunit 2 OS=Homo sapiens OX=9606 GN=CASTOR2 PE=1 SV=3                      | -0,559465801 | 1,285657 |

|        |                                                                                                                       |              |          |
|--------|-----------------------------------------------------------------------------------------------------------------------|--------------|----------|
| P40222 | Alpha-taxilin OS=Homo sapiens OX=9606 GN=TXLNA PE=1 SV=3                                                              | -0,154022134 | 1,285422 |
| Q98XB4 | Oxysterol-binding protein-related protein 11 OS=Homo sapiens OX=9606 GN=OSBPL11 PE=1 SV=2                             | 0,162296686  | 1,285163 |
| Q9NV17 | ATPase family AAA domain-containing protein 3A OS=Homo sapiens OX=9606 GN=ATAD3A PE=1 SV=2                            | 0,162213639  | 1,284353 |
| Q9Y4F1 | FERM, ARHGEF and pleckstrin domain-containing protein 1 OS=Homo sapiens OX=9606 GN=FARP1 PE=1 SV=1                    | -0,140486498 | 1,283451 |
| Q9NVV4 | Poly(A) RNA polymerase, mitochondrial OS=Homo sapiens OX=9606 GN=MTPAP PE=1 SV=1                                      | 0,158543015  | 1,283107 |
| O75113 | NEDD4-binding protein 1 OS=Homo sapiens OX=9606 GN=N4BP1 PE=1 SV=4                                                    | -0,835318811 | 1,282766 |
| P07588 | Cathepsin B OS=Homo sapiens OX=9606 GN=CTSB PE=1 SV=3                                                                 | 0,171763629  | 1,281927 |
| A6NKD9 | Coiled-coil domain-containing protein 85C OS=Homo sapiens OX=9606 GN=CCDC85C PE=1 SV=1                                | -0,282644341 | 1,280121 |
| O75822 | Eukaryotic translation initiation factor 3 subunit J OS=Homo sapiens OX=9606 GN=EIF3J PE=1 SV=2                       | 0,161748816  | 1,279824 |
| Q575C0 | Syntaxin-binding protein 5 OS=Homo sapiens OX=9606 GN=STXB5 PE=1 SV=1                                                 | -0,176419286 | 1,278624 |
| P07339 | Cathepsin D OS=Homo sapiens OX=9606 GN=CTSD PE=1 SV=1                                                                 | 0,121376362  | 1,278446 |
| O95793 | Double-stranded RNA-binding protein Staufin homolog 1 OS=Homo sapiens OX=9606 GN=STAU1 PE=1 SV=2                      | -0,103584159 | 1,278279 |
| Q641Q2 | WASH complex subunit 2A OS=Homo sapiens OX=9606 GN=WASHC2A PE=1 SV=3                                                  | -0,899984753 | 1,277394 |
| Q12834 | Cell division cycle protein 20 homolog OS=Homo sapiens OX=9606 GN=CDC20 PE=1 SV=2                                     | -0,281952122 | 1,27658  |
| Q9HC07 | Transmembrane protein 165 OS=Homo sapiens OX=9606 GN=TMEM165 PE=1 SV=1                                                | -0,554545041 | 1,276177 |
| P49750 | YLP motif-containing protein 1 OS=Homo sapiens OX=9606 GN=YLPM1 PE=1 SV=4                                             | -0,197414259 | 1,274512 |
| O60427 | Acyl-CoA (8-3)-desaturase OS=Homo sapiens OX=9606 GN=FADS1 PE=1 SV=3                                                  | -0,281413134 | 1,273823 |
| O43920 | NADH dehydrogenase [ubiquinone] iron-sulfur protein 5 OS=Homo sapiens OX=9606 GN=NDUF55 PE=1 SV=3                     | 0,281370418  | 1,273605 |
| O00115 | Deoxyribonuclease-2-alpha OS=Homo sapiens OX=9606 GN=DNASE2 PE=1 SV=2                                                 | -0,281199953 | 1,272733 |
| Q6DN90 | IQ motif and SEC7 domain-containing protein 1 OS=Homo sapiens OX=9606 GN=IQSEC1 PE=1 SV=1                             | -0,552743804 | 1,272696 |
| Q8N6T3 | ADP-ribosylation factor GTPase-activating protein 1 OS=Homo sapiens OX=9606 GN=ARFGAP1 PE=1 SV=2                      | 0,160989381  | 1,272432 |
| A6NIH7 | Protein unc-119 homolog B OS=Homo sapiens OX=9606 GN=UNC119B PE=1 SV=1                                                | -0,350974367 | 1,272261 |
| Q7Z434 | Mitochondrial antiviral-signaling protein OS=Homo sapiens OX=9606 GN=MAVS PE=1 SV=2                                   | 0,16094652   | 1,272015 |
| O75182 | Paired amphipathic helix protein Sin3b OS=Homo sapiens OX=9606 GN=SIN3B PE=1 SV=2                                     | 0,281015035  | 1,271787 |
| O00425 | Insulin-like growth factor 2 mRNA-binding protein 3 OS=Homo sapiens OX=9606 GN=IGFBP3 PE=1 SV=2                       | 0,124795992  | 1,271573 |
| Q13671 | Ras and Rab interactor 1 OS=Homo sapiens OX=9606 GN=RIN1 PE=1 SV=4                                                    | -0,280917067 | 1,271286 |
| Q9H845 | Acyl-CoA dehydrogenase family member 9, mitochondrial OS=Homo sapiens OX=9606 GN=ACAD9 PE=1 SV=1                      | -0,110922247 | 1,271088 |
| Q9GZT6 | Coiled-coil domain-containing protein 90B, mitochondrial OS=Homo sapiens OX=9606 GN=CCDC90B PE=1 SV=2                 | -0,551826622 | 1,270997 |
| Q15257 | Serine/threonine-protein phosphatase 2A activator OS=Homo sapiens OX=9606 GN=PTPA PE=1 SV=3                           | -0,152529751 | 1,270048 |
| P05455 | Lipin domain OS=Homo sapiens OX=9606 GN=SSB PE=1 SV=2                                                                 | 0,110797794  | 1,269297 |
| Q96CT7 | Coiled-coil domain-containing protein 124 OS=Homo sapiens OX=9606 GN=CCDC124 PE=1 SV=1                                | 0,196543814  | 1,267774 |
| O15269 | Serine palmitoyltransferase 1 OS=Homo sapiens OX=9606 GN=SPTLC1 PE=1 SV=1                                             | 0,196438108  | 1,266918 |
| Q7Z392 | Trafficking protein particle complex subunit 11 OS=Homo sapiens OX=9606 GN=TRAPP11 PE=1 SV=2                          | -1,115786828 | 1,265767 |
| Q70E73 | Ras-associated and pleckstrin domain-containing protein 1 OS=Homo sapiens OX=9606 GN=RAPH1 PE=1 SV=3                  | 0,169849443  | 1,264458 |
| Q13617 | Cullin-2 OS=Homo sapiens OX=9606 GN=CUL2 PE=1 SV=2                                                                    | -0,110419716 | 1,263862 |
| Q8IWC1 | MAP7 domain-containing protein 3 OS=Homo sapiens OX=9606 GN=MAP7D3 PE=1 SV=2                                          | 0,823887904  | 1,263724 |
| Q985D7 | Cancer-related nucleoside-triphosphatase OS=Homo sapiens OX=9606 GN=NTPCR PE=1 SV=1                                   | -0,181402863 | 1,263166 |
| O43159 | Ribosomal RNA-processing protein 8 OS=Homo sapiens OX=9606 GN=RRP8 PE=1 SV=2                                          | -0,347642576 | 1,259528 |
| Q9H446 | RWD domain-containing protein 1 OS=Homo sapiens OX=9606 GN=RWDD1 PE=1 SV=1                                            | 0,545756195  | 1,259134 |
| Q92804 | TATA-binding protein-associated factor 2N OS=Homo sapiens OX=9606 GN=TAFA15 PE=1 SV=1                                 | 0,23989584   | 1,258943 |
| Q9BVJ6 | U3 small nucleolar RNA-associated protein 14 homolog A OS=Homo sapiens OX=9606 GN=UTP14A PE=1 SV=1                    | -0,195357774 | 1,258526 |
| Q9BZL6 | #N/D                                                                                                                  | 0,193776621  | 1,258417 |
| Q8NB46 | Serine/threonine-protein phosphatase 6 regulatory ankyrin repeat subunit C OS=Homo sapiens OX=9606 GN=ANKRD52 P       | -0,159502923 | 1,257999 |
| Q9ULV0 | Unconventional myosin-Vb OS=Homo sapiens OX=9606 GN=MYO5B PE=1 SV=3                                                   | -0,347128658 | 1,257563 |
| P53611 | Geranylgeranyl transferase type-2 subunit beta OS=Homo sapiens OX=9606 GN=RABGGTB PE=1 SV=2                           | -0,346719899 | 1,255999 |
| O94851 | [F-actin]-monooxygenase MICAL2 OS=Homo sapiens OX=9606 GN=MICAL2 PE=1 SV=1                                            | -0,138039195 | 1,255732 |
| P17931 | Galectin-3 OS=Homo sapiens OX=9606 GN=LGALS3 PE=1 SV=5                                                                | -0,194991943 | 1,255687 |
| Q92963 | GTP-binding protein Rit1 OS=Homo sapiens OX=9606 GN=RIT1 PE=1 SV=1                                                    | 0,543667045  | 1,25505  |
| Q14493 | Histone RNA hairpin-binding protein OS=Homo sapiens OX=9606 GN=SLBP PE=1 SV=1                                         | 0,531671394  | 1,254195 |
| O75150 | E3 ubiquitin-protein ligase BRE1B OS=Homo sapiens OX=9606 GN=RN4F04 PE=1 SV=5                                         | -0,123403105 | 1,253873 |
| O75718 | Cartilage-associated protein OS=Homo sapiens OX=9606 GN=CRTAP PE=1 SV=1                                               | 0,127674537  | 1,253472 |
| Q8TAE8 | Growth arrest and DNA damage-inducible proteins-interacting protein 1 OS=Homo sapiens OX=9606 GN=GADD45GIP1 PE        | -0,213247865 | 1,252408 |
| O15127 | Secretory carrier-associated membrane protein 2 OS=Homo sapiens OX=9606 GN=SCAMP2 PE=1 SV=2                           | 0,542162952  | 1,252125 |
| Q9NVN8 | Guanine nucleotide-binding protein-like 3-like protein OS=Homo sapiens OX=9606 GN=GNL3L PE=1 SV=1                     | 0,277045831  | 1,2515   |
| P02792 | Ferritin light chain OS=Homo sapiens OX=9606 GN=FTL PE=1 SV=2                                                         | -0,213063115 | 1,251117 |
| Q96C86 | m7GpppX diphosphatase OS=Homo sapiens OX=9606 GN=DCPS PE=1 SV=2                                                       | -0,212939931 | 1,250256 |
| Q6PKG0 | La-related protein 1 OS=Homo sapiens OX=9606 GN=LARP1 PE=1 SV=2                                                       | -0,088511843 | 1,246808 |
| Q96C90 | Protein phosphatase 1 regulatory subunit 14B OS=Homo sapiens OX=9606 GN=PPP1R14B PE=1 SV=3                            | 0,275834851  | 1,245316 |
| Q13424 | Alpha-1-syntrophin OS=Homo sapiens OX=9606 GN=SNTA1 PE=1 SV=1                                                         | -0,538517643 | 1,244991 |
| P48507 | Glutamate--cysteine ligase regulatory subunit OS=Homo sapiens OX=9606 GN=GCLM PE=1 SV=1                               | 0,275623683  | 1,244237 |
| Q9NVH2 | Integrator complex subunit 7 OS=Homo sapiens OX=9606 GN=INTS7 PE=1 SV=1                                               | -0,538000919 | 1,243977 |
| Q9BR19 | DNA replication complex GINS protein SLD5 OS=Homo sapiens OX=9606 GN=GINS4 PE=1 SV=1                                  | -0,537893423 | 1,243766 |
| P43378 | Tyrosine-protein phosphatase non-receptor type 9 OS=Homo sapiens OX=9606 GN=PTPN9 PE=1 SV=1                           | -0,211891696 | 1,242936 |
| Q9Y221 | 60S ribosome subunit biogenesis protein NIP7 homolog OS=Homo sapiens OX=9606 GN=NIP7 PE=1 SV=1                        | 0,343254344  | 1,242738 |
| O14646 | Chromodomain-helicase-DNA-binding protein 1 OS=Homo sapiens OX=9606 GN=CHD1 PE=1 SV=2                                 | 0,275315838  | 1,242666 |
| Q9UKG9 | Peroxisomal carnitine O-octanoyltransferase OS=Homo sapiens OX=9606 GN=CROT PE=1 SV=2                                 | 0,34322976   | 1,242644 |
| Q8NDT2 | Putative RNA-binding protein 15B OS=Homo sapiens OX=9606 GN=RBM15B PE=1 SV=3                                          | -0,343155818 | 1,242361 |
| Q14202 | Zinc finger MYM-type protein 3 OS=Homo sapiens OX=9606 GN=ZMYM3 PE=1 SV=2                                             | -0,274962876 | 1,240864 |
| Q96B26 | Exosome complex component RRP43 OS=Homo sapiens OX=9606 GN=EXOSC8 PE=1 SV=1                                           | 0,211585457  | 1,2408   |
| P19525 | Interferon-induced, double-stranded RNA-activated protein kinase OS=Homo sapiens OX=9606 GN=EIF2AK2 PE=1 SV=2         | -0,114976075 | 1,24057  |
| Q08380 | Galectin-3-binding protein OS=Homo sapiens OX=9606 GN=LGALS3BP PE=1 SV=1                                              | 0,136641098  | 1,239977 |
| Q05086 | Ubiquitin-protein ligase E3A OS=Homo sapiens OX=9606 GN=UBE3A PE=1 SV=4                                               | 0,178629258  | 1,239739 |
| Q8TF01 | Arginine/serine-rich protein PNISR OS=Homo sapiens OX=9606 GN=PNISR PE=1 SV=2                                         | 0,539105678  | 1,238961 |
| O60568 | Multifunctional procollagen lysine hydroxylase and glycosyltransferase LH3 OS=Homo sapiens OX=9606 GN=PLOD3 PE=1 SV=1 | 0,094795242  | 1,238756 |
| P12268 | Inosine-5'-monophosphate dehydrogenase 2 OS=Homo sapiens OX=9606 GN=IMPDH2 PE=1 SV=2                                  | 0,094794971  | 1,238567 |
| O75223 | Gamma-glutamylcyclotransferase OS=Homo sapiens OX=9606 GN=GGCT PE=1 SV=1                                              | -0,178428954 | 1,238051 |
| Q9Y6D5 | Brefeldin A-inhibited guanine nucleotide-exchange protein 2 OS=Homo sapiens OX=9606 GN=ARFGEF2 PE=1 SV=3              | -0,211057539 | 1,237118 |
| P31749 | RAC-alpha serine/threonine-protein kinase OS=Homo sapiens OX=9606 GN=AKT1 PE=1 SV=2                                   | -0,235967988 | 1,234903 |
| Q9BSJ8 | Extended synaptotagmin-1 OS=Homo sapiens OX=9606 GN=ESYT1 PE=1 SV=1                                                   | -0,075755686 | 1,234108 |
| Q9HA77 | Probable cytosine--tRNA ligase, mitochondrial OS=Homo sapiens OX=9606 GN=CARS2 PE=1 SV=1                              | 0,340643885  | 1,232741 |
| Q8NBX0 | Saccharopine dehydrogenase-like oxidoreductase OS=Homo sapiens OX=9606 GN=SCCPDH PE=1 SV=1                            | 0,14189653   | 1,231603 |
| O60942 | mRNA-capping enzyme OS=Homo sapiens OX=9606 GN=RNGTT PE=1 SV=1                                                        | 0,340334981  | 1,231558 |
| P08582 | Melanotransferrin OS=Homo sapiens OX=9606 GN=MELTF PE=1 SV=2                                                          | -0,177585952 | 1,230954 |
| Q99615 | DnaJ homolog subfamily C member 7 OS=Homo sapiens OX=9606 GN=DNAJC7 PE=1 SV=2                                         | 0,100516558  | 1,230875 |
| P05496 | ATP synthase F(0) complex subunit C1, mitochondrial OS=Homo sapiens OX=9606 GN=ATP5MC1 PE=1 SV=2                      | -0,530870454 | 1,229943 |
| Q96P47 | Arf-GAP with GTPase, ANK repeat and PH domain-containing protein 3 OS=Homo sapiens OX=9606 GN=AGAP3 PE=1 SV=2         | -0,530723519 | 1,229652 |
| Q9Y295 | Developmentally-regulated GTP-binding protein 1 OS=Homo sapiens OX=9606 GN=DRG1 PE=1 SV=1                             | -0,125704467 | 1,229444 |
| Q92543 | Sorting nexin-19 OS=Homo sapiens OX=9606 GN=SNX19 PE=1 SV=2                                                           | 0,350623458  | 1,229219 |
| Q9UII2 | ATPase inhibitor, mitochondrial OS=Homo sapiens OX=9606 GN=ATP5IF1 PE=1 SV=1                                          | -0,339606586 | 1,228767 |
| Q13948 | #N/D                                                                                                                  | -0,209817844 | 1,22848  |
| P46781 | 40S ribosomal protein S9 OS=Homo sapiens OX=9606 GN=RP59 PE=1 SV=3                                                    | -0,114073486 | 1,228417 |

|        |                                                                                                                       |              |          |
|--------|-----------------------------------------------------------------------------------------------------------------------|--------------|----------|
| Q9NTZ6 | RNA-binding protein 12 OS=Homo sapiens OX=9606 GN=RBM12 PE=1 SV=1                                                     | -0,156430916 | 1,22831  |
| Q17RY0 | Cytoplasmic polyadenylation element-binding protein 4 OS=Homo sapiens OX=9606 GN=CPEB4 PE=1 SV=1                      | 0,339142652  | 1,226989 |
| Q9UN16 | Dual specificity protein phosphatase 12 OS=Homo sapiens OX=9606 GN=DUSP12 PE=1 SV=1                                   | -0,272155826 | 1,22654  |
| Q8IXM3 | 39S ribosomal protein L41, mitochondrial OS=Homo sapiens OX=9606 GN=MRPL41 PE=1 SV=1                                  | -0,529005915 | 1,226257 |
| Q9UHD2 | Serine/threonine-protein kinase TBK1 OS=Homo sapiens OX=9606 GN=TBK1 PE=1 SV=1                                        | -0,191066075 | 1,22531  |
| Q9HS01 | ESF1 homolog OS=Homo sapiens OX=9606 GN=ESF1 PE=1 SV=1                                                                | 0,271787427  | 1,224661 |
| O95470 | Sphingosine-1-phosphate lyase 1 OS=Homo sapiens OX=9606 GN=SGPL1 PE=1 SV=3                                            | -0,176819324 | 1,224509 |
| Q9NRZ7 | 1-acyl-sn-glycerol-3-phosphate acyltransferase gamma OS=Homo sapiens OX=9606 GN=AGPAT3 PE=1 SV=1                      | -0,271704527 | 1,224238 |
| Q15121 | Astrocytic phosphoprotein PEA-15 OS=Homo sapiens OX=9606 GN=PEA15 PE=1 SV=2                                           | 0,190781356  | 1,223113 |
| Q2KHT3 | Protein CLEC16A OS=Homo sapiens OX=9606 GN=CLEC16A PE=1 SV=2                                                          | 0,265267604  | 1,222758 |
| O43719 | HIV Tat-specific factor 1 OS=Homo sapiens OX=9606 GN=HTATSF1 PE=1 SV=1                                                | -0,526907391 | 1,222101 |
| Q96559 | Ran-binding protein 9 OS=Homo sapiens OX=9606 GN=RANBP9 PE=1 SV=1                                                     | -0,271264003 | 1,221992 |
| Q52LJ0 | Protein FAM98B OS=Homo sapiens OX=9606 GN=FAM98B PE=1 SV=2                                                            | -0,165088147 | 1,221277 |
| Q96758 | Msx2-interacting protein OS=Homo sapiens OX=9606 GN=SPEN PE=1 SV=1                                                    | 0,86358371   | 1,22119  |
| Q4KMQ1 | Taperin OS=Homo sapiens OX=9606 GN=TPRN PE=1 SV=2                                                                     | -0,18297193  | 1,218976 |
| Q9HAV4 | Exportin-5 OS=Homo sapiens OX=9606 GN=XPO5 PE=1 SV=1                                                                  | -0,085462674 | 1,21858  |
| O95870 | Phosphatidylserine lipase ABHD16A OS=Homo sapiens OX=9606 GN=ABHD16A PE=1 SV=3                                        | 0,270454919  | 1,217867 |
| Q96PE3 | Type I inositol 3,4-bisphosphate 4-phosphatase OS=Homo sapiens OX=9606 GN=INPP4A PE=1 SV=1                            | 0,653070901  | 1,21737  |
| P06746 | DNA polymerase beta OS=Homo sapiens OX=9606 GN=POLB PE=1 SV=3                                                         | -0,23308045  | 1,217275 |
| O60870 | DNA/RNA-binding protein KIN17 OS=Homo sapiens OX=9606 GN=KIN PE=1 SV=2                                                | 0,183295027  | 1,21725  |
| P62249 | 40S ribosomal protein S16 OS=Homo sapiens OX=9606 GN=RPS16 PE=1 SV=2                                                  | -0,164592339 | 1,216802 |
| Q96582 | Ubiquitin-like protein 7 OS=Homo sapiens OX=9606 GN=UBL7 PE=1 SV=2                                                    | 0,523952738  | 1,216236 |
| Q15291 | Retinoblastoma-binding protein 5 OS=Homo sapiens OX=9606 GN=RBBP5 PE=1 SV=2                                           | 0,207776997  | 1,214286 |
| P17812 | CTP synthase 1 OS=Homo sapiens OX=9606 GN=CTPS1 PE=1 SV=2                                                             | -0,106911364 | 1,213781 |
| Q99459 | Cell division cycle 5-like protein OS=Homo sapiens OX=9606 GN=CDC5L PE=1 SV=2                                         | 0,112939418  | 1,213199 |
| P45974 | Ubiquitin carboxyl-terminal hydrolase 5 OS=Homo sapiens OX=9606 GN=USP5 PE=1 SV=2                                     | -0,081112037 | 1,211215 |
| Q96C19 | EF-hand domain-containing protein D2 OS=Homo sapiens OX=9606 GN=EFHD2 PE=1 SV=1                                       | -0,174895645 | 1,208373 |
| Q6DD88 | Atlastin-3 OS=Homo sapiens OX=9606 GN=ATL3 PE=1 SV=1                                                                  | -0,109370217 | 1,207566 |
| P63261 | Actin, cytoplasmic 2 OS=Homo sapiens OX=9606 GN=ACTG1 PE=1 SV=1                                                       | 0,333905712  | 1,206907 |
| O14802 | DNA-directed RNA polymerase III subunit RPC1 OS=Homo sapiens OX=9606 GN=POLR3A PE=1 SV=2                              | 0,653245191  | 1,206839 |
| Q9UMX0 | Ubiquilin-1 OS=Homo sapiens OX=9606 GN=UBLN1 PE=1 SV=2                                                                | 0,123705637  | 1,205208 |
| Q06587 | E3 ubiquitin-protein ligase RING1 OS=Homo sapiens OX=9606 GN=RING1 PE=1 SV=2                                          | -0,333291611 | 1,20455  |
| Q16891 | MICOS complex subunit MIC60 OS=Homo sapiens OX=9606 GN=IMMT PE=1 SV=1                                                 | -0,0819955   | 1,204412 |
| P27708 | CAD protein OS=Homo sapiens OX=9606 GN=CAD PE=1 SV=3                                                                  | -0,056738052 | 1,20428  |
| O00458 | Interferon-related developmental regulator 1 OS=Homo sapiens OX=9606 GN=IFRD1 PE=1 SV=4                               | 0,517555519  | 1,20348  |
| Q99497 | Protein/nucleic acid deglycase DJ-1 OS=Homo sapiens OX=9606 GN=PARK7 PE=1 SV=2                                        | -0,123446977 | 1,202082 |
| Q8NOU8 | Vitamin K epoxide reductase complex subunit 1-like protein 1 OS=Homo sapiens OX=9606 GN=VKORC11 PE=1 SV=2             | 0,332264024  | 1,200606 |
| O14657 | Torsin-1B OS=Homo sapiens OX=9606 GN=TOR1B PE=1 SV=2                                                                  | 0,230107763  | 1,199168 |
| Q96L91 | E1A-binding protein p400 OS=Homo sapiens OX=9606 GN=EP400 PE=1 SV=4                                                   | -0,515316305 | 1,198997 |
| Q9BQQ3 | Golgi reassembly-stacking protein 1 OS=Homo sapiens OX=9606 GN=GORASP1 PE=1 SV=3                                      | -0,515246666 | 1,198858 |
| O15120 | 1-acyl-sn-glycerol-3-phosphate acyltransferase beta OS=Homo sapiens OX=9606 GN=AGPAT2 PE=1 SV=1                       | 0,746299429  | 1,197692 |
| P60660 | Myosin light polypeptide 6 OS=Homo sapiens OX=9606 GN=MYL6 PE=1 SV=2                                                  | -0,153066183 | 1,196013 |
| Q8N142 | Adenylosuccinate synthetase isozyme 1 OS=Homo sapiens OX=9606 GN=ADSS1L PE=1 SV=1                                     | 0,056508191  | 1,193906 |
| P55072 | Transitional endoplasmic reticulum ATPase OS=Homo sapiens OX=9606 GN=VCP PE=1 SV=4                                    | 0,059019696  | 1,193156 |
| Q16401 | 26S proteasome non-ATPase regulatory subunit 5 OS=Homo sapiens OX=9606 GN=PSMD5 PE=1 SV=3                             | -0,105440493 | 1,192975 |
| Q13614 | Myotubularin-related protein 2 OS=Homo sapiens OX=9606 GN=MTMR2 PE=1 SV=4                                             | 0,511931727  | 1,192203 |
| Q15843 | NEDD8 OS=Homo sapiens OX=9606 GN=NEDD8 PE=1 SV=1                                                                      | 0,265333426  | 1,191783 |
| Q9Y4K3 | TNF receptor-associated factor 6 OS=Homo sapiens OX=9606 GN=TRAF6 PE=1 SV=1                                           | -0,514395243 | 1,191365 |
| P51659 | Peroxisomal multifunctional enzyme type 2 OS=Homo sapiens OX=9606 GN=HSD17B4 PE=1 SV=3                                | -0,09010966  | 1,191034 |
| Q14571 | Inositol 1,4,5-trisphosphate receptor type 2 OS=Homo sapiens OX=9606 GN=ITPR2 PE=1 SV=2                               | 0,259603593  | 1,190767 |
| P42694 | Probable helicase with zinc finger domain OS=Homo sapiens OX=9606 GN=HELZ PE=1 SV=2                                   | 0,30753306   | 1,188602 |
| Q14012 | Calcium/calmodulin-dependent protein kinase type 1 OS=Homo sapiens OX=9606 GN=CAMK1 PE=1 SV=1                         | -0,204023505 | 1,188265 |
| Q726E9 | E3 ubiquitin-protein ligase RBBP6 OS=Homo sapiens OX=9606 GN=RBBP6 PE=1 SV=1                                          | 0,509855495  | 1,188025 |
| P0CG08 | Golgi pH regulator B OS=Homo sapiens OX=9606 GN=GPR89B PE=1 SV=1                                                      | 0,32885481   | 1,187515 |
| Q9BZK7 | F-box-like/WD repeat-containing protein TBL1XR1 OS=Homo sapiens OX=9606 GN=TBL1XR1 PE=1 SV=1                          | -0,122234147 | 1,187459 |
| Q16594 | Transcription initiation factor TFIIID subunit 9 OS=Homo sapiens OX=9606 GN=TAFA9 PE=1 SV=1                           | -0,509567193 | 1,187444 |
| Q9NZL9 | Methionine adenosyltransferase 2 subunit beta OS=Homo sapiens OX=9606 GN=MAT2B PE=1 SV=1                              | 0,131888257  | 1,186853 |
| O75818 | Ribonuclease P protein subunit p40 OS=Homo sapiens OX=9606 GN=RPP40 PE=1 SV=3                                         | -0,203564688 | 1,185092 |
| P46060 | Ran GTPase-activating protein 1 OS=Homo sapiens OX=9606 GN=RANGAP1 PE=1 SV=1                                          | -0,082221977 | 1,184864 |
| Q13098 | COP9 signalosome complex subunit 1 OS=Homo sapiens OX=9606 GN=GPS1 PE=1 SV=4                                          | -0,11404002  | 1,182808 |
| P98164 | Low-density lipoprotein receptor-related protein 2 OS=Homo sapiens OX=9606 GN=LRP2 PE=1 SV=3                          | 1,608761181  | 1,182766 |
| P36957 | Dihydrodipolyllysine-residue succinyltransferase component of 2-oxoglutarate dehydrogenase complex, mitochondrial OS= | -0,160704714 | 1,181866 |
| O43818 | U3 small nucleolar RNA-interacting protein 2 OS=Homo sapiens OX=9606 GN=RRP9 PE=1 SV=1                                | 0,263175645  | 1,180808 |
| Q13610 | Periodic tryptophan protein 1 homolog OS=Homo sapiens OX=9606 GN=PWP1 PE=1 SV=1                                       | -0,185231971 | 1,180478 |
| O14972 | Vacuolar protein sorting-associated protein 26C OS=Homo sapiens OX=9606 GN=VPS26C PE=1 SV=1                           | -0,326847773 | 1,179804 |
| O95749 | Geranylgeranyl pyrophosphate synthase OS=Homo sapiens OX=9606 GN=GGPS1 PE=1 SV=1                                      | -0,262855465 | 1,17918  |
| Q96DE0 | U8 snoRNA-decapping enzyme OS=Homo sapiens OX=9606 GN=NUDT16 PE=1 SV=2                                                | -0,180059937 | 1,179054 |
| Q98YD1 | 39S ribosomal protein L13, mitochondrial OS=Homo sapiens OX=9606 GN=MRPL13 PE=1 SV=1                                  | -0,262829606 | 1,179048 |
| Q9Y5V3 | Melanoma-associated antigen D1 OS=Homo sapiens OX=9606 GN=MAGED1 PE=1 SV=3                                            | -0,171372856 | 1,178958 |
| P98175 | RNA-binding protein 10 OS=Homo sapiens OX=9606 GN=RBM10 PE=1 SV=3                                                     | 0,151237343  | 1,178556 |
| O60888 | Protein CutA OS=Homo sapiens OX=9606 GN=CUTA PE=1 SV=2                                                                | 0,202609982  | 1,178495 |
| Q8IUI8 | Cytokine receptor-like factor 3 OS=Homo sapiens OX=9606 GN=CRLF3 PE=1 SV=2                                            | 0,326446644  | 1,178263 |
| Q9C0I1 | Myotubularin-related protein 12 OS=Homo sapiens OX=9606 GN=MTMR12 PE=1 SV=2                                           | 0,87747731   | 1,178189 |
| P30740 | Leukocyte elastase inhibitor OS=Homo sapiens OX=9606 GN=SERPIN8 PE=1 SV=1                                             | -0,171220567 | 1,177691 |
| P53814 | Smoothelin OS=Homo sapiens OX=9606 GN=SMTN PE=1 SV=7                                                                  | 0,18463933   | 1,175944 |
| Q96AV8 | Transcription factor E2F7 OS=Homo sapiens OX=9606 GN=E2F7 PE=1 SV=3                                                   | -0,313070863 | 1,175229 |
| Q9NQZ2 | Something about silencing protein 10 OS=Homo sapiens OX=9606 GN=JTP3 PE=1 SV=1                                        | -0,225799306 | 1,173    |
| P13987 | CD59 glycoprotein OS=Homo sapiens OX=9606 GN=CD59 PE=1 SV=1                                                           | 0,261534458  | 1,172466 |
| Q9H910 | Jupiter microtubule associated homolog 2 OS=Homo sapiens OX=9606 GN=JPT2 PE=1 SV=1                                    | -0,150529668 | 1,17182  |
| O14745 | Na(+)/H(+) exchange regulatory cofactor NHE-RF1 OS=Homo sapiens OX=9606 GN=SLC9A3R1 PE=1 SV=4                         | 0,106738451  | 1,171488 |
| Q9NV59 | Pyridoxine-5'-phosphate oxidase OS=Homo sapiens OX=9606 GN=PNPO PE=1 SV=1                                             | -0,170448027 | 1,171265 |
| P53999 | Activated RNA polymerase II transcriptional coactivator p15 OS=Homo sapiens OX=9606 GN=SUB1 PE=1 SV=3                 | 0,183917737  | 1,17043  |
| Q8NDI1 | EH domain-binding protein 1 OS=Homo sapiens OX=9606 GN=EHPB1 PE=1 SV=3                                                | -0,201325581 | 1,169632 |
| Q8N138 | ORM1-like protein 3 OS=Homo sapiens OX=9606 GN=ORMDL3 PE=1 SV=1                                                       | 0,500759497  | 1,169623 |
| Q9BRZ2 | E3 ubiquitin-protein ligase TRIM56 OS=Homo sapiens OX=9606 GN=TRIM56 PE=1 SV=3                                        | 0,260960074  | 1,169548 |
| O14908 | PDZ domain-containing protein GIPC1 OS=Homo sapiens OX=9606 GN=GIPC1 PE=1 SV=2                                        | -0,116631568 | 1,168907 |
| Q96PU4 | E3 ubiquitin-protein ligase UHRF2 OS=Homo sapiens OX=9606 GN=UHRF2 PE=1 SV=1                                          | -0,500329249 | 1,168749 |
| Q92870 | Amyloid-beta A4 precursor protein-binding family B member 2 OS=Homo sapiens OX=9606 GN=APBB2 PE=1 SV=3                | -0,375747886 | 1,168478 |
| Q69YN4 | Protein virilizer homolog OS=Homo sapiens OX=9606 GN=VIRMA PE=1 SV=2                                                  | -0,22484166  | 1,167196 |
| Q9NZZ3 | Charged multivesicular body protein 5 OS=Homo sapiens OX=9606 GN=CHMP5 PE=1 SV=1                                      | -0,224610948 | 1,165798 |
| Q9BW62 | Katanin p60 ATPase-containing subunit A-like 1 OS=Homo sapiens OX=9606 GN=KATNAL1 PE=1 SV=1                           | 0,169732946  | 1,165326 |

|        |                                                                                                                   |              |          |
|--------|-------------------------------------------------------------------------------------------------------------------|--------------|----------|
| Q99986 | Serine/threonine-protein kinase VRK1 OS=Homo sapiens OX=9606 GN=VRK1 PE=1 SV=1                                    | 0,231646615  | 1,164176 |
| Q9H497 | Torsin-3A OS=Homo sapiens OX=9606 GN=TOR3A PE=1 SV=1                                                              | -0,497906469 | 1,163819 |
| P42696 | RNA-binding protein 34 OS=Homo sapiens OX=9606 GN=RBM34 PE=1 SV=2                                                 | 0,497638715  | 1,163273 |
| P09211 | Glutathione S-transferase P OS=Homo sapiens OX=9606 GN=GSTP1 PE=1 SV=2                                            | 0,135438163  | 1,162902 |
| Q9BST9 | Rhotekin OS=Homo sapiens OX=9606 GN=RTKN PE=1 SV=2                                                                | -0,278838833 | 1,161624 |
| Q60506 | Heterogeneous nuclear ribonucleoprotein Q OS=Homo sapiens OX=9606 GN=SYNCRIP PE=1 SV=2                            | -0,112331845 | 1,16087  |
| Q9H8S9 | MOB kinase activator 1A OS=Homo sapiens OX=9606 GN=MOB1A PE=1 SV=4                                                | -0,158286778 | 1,160271 |
| Q9UIY4 | ADP-ribosylation factor-binding protein GGA2 OS=Homo sapiens OX=9606 GN=GGA2 PE=1 SV=3                            | 0,182573625  | 1,160175 |
| P22695 | Cytochrome b-c1 complex subunit 2, mitochondrial OS=Homo sapiens OX=9606 GN=UQCRC2 PE=1 SV=3                      | -0,129478129 | 1,160173 |
| Q9ULR0 | Pre-mRNA-splicing factor ISY1 homolog OS=Homo sapiens OX=9606 GN=ISY1 PE=1 SV=3                                   | -0,321652901 | 1,159831 |
| O75955 | Flotillin-1 OS=Homo sapiens OX=9606 GN=FLOT1 PE=1 SV=3                                                            | -0,135116029 | 1,159505 |
| Q3SXM5 | Inactive hydroxysteroid dehydrogenase-like protein 1 OS=Homo sapiens OX=9606 GN=HSDL1 PE=1 SV=3                   | 0,182470176  | 1,159386 |
| O00151 | PDZ and LIM domain protein 1 OS=Homo sapiens OX=9606 GN=PDLLM1 PE=1 SV=4                                          | 0,129397296  | 1,159282 |
| Q86W25 | NACHT, LRR and PYD domains-containing protein 13 OS=Homo sapiens OX=9606 GN=NLRP13 PE=2 SV=2                      | -0,208851056 | 1,158071 |
| Q7L8L6 | FAST kinase domain-containing protein 5, mitochondrial OS=Homo sapiens OX=9606 GN=FASTKD5 PE=1 SV=1               | -0,258571011 | 1,157417 |
| P15408 | Fos-related antigen 2 OS=Homo sapiens OX=9606 GN=FOSL2 PE=1 SV=1                                                  | 0,494707474  | 1,157292 |
| Q9BV73 | Centrosome-associated protein CEP250 OS=Homo sapiens OX=9606 GN=CEP250 PE=1 SV=2                                  | -0,293739481 | 1,157035 |
| P13073 | Cytochrome c oxidase subunit 4 isoform 1, mitochondrial OS=Homo sapiens OX=9606 GN=COX4I1 PE=1 SV=1               | -0,181998215 | 1,155791 |
| Q92692 | Nectin-2 OS=Homo sapiens OX=9606 GN=NECTIN2 PE=1 SV=1                                                             | 0,320460206  | 1,155243 |
| P53041 | Serine/threonine-protein phosphatase 5 OS=Homo sapiens OX=9606 GN=PPP5C PE=1 SV=1                                 | -0,128963738 | 1,154502 |
| P11532 | Dystrophin OS=Homo sapiens OX=9606 GN=DMD PE=1 SV=3                                                               | -0,222717125 | 1,154336 |
| Q16740 | ATP-dependent Clp protease proteolytic subunit, mitochondrial OS=Homo sapiens OX=9606 GN=CLPP PE=1 SV=1           | 0,181725904  | 1,153717 |
| Q9UIX5 | Anaphase-promoting complex subunit 4 OS=Homo sapiens OX=9606 GN=ANAPC4 PE=1 SV=2                                  | -0,319898639 | 1,153082 |
| P15121 | Aldo-keto reductase family 1 member B1 OS=Homo sapiens OX=9606 GN=AKR1B1 PE=1 SV=3                                | 0,128788897  | 1,152576 |
| P31689 | DnaJ homolog subfamily A member 1 OS=Homo sapiens OX=9606 GN=DNAJA1 PE=1 SV=2                                     | 0,119305035  | 1,152363 |
| Q6NXC6 | Armadillo repeat-containing protein 6 OS=Homo sapiens OX=9606 GN=ARMC6 PE=1 SV=2                                  | -0,168130531 | 1,152043 |
| Q6PL18 | ATPase family AAA domain-containing protein 2 OS=Homo sapiens OX=9606 GN=ATAD2 PE=1 SV=1                          | -0,222164785 | 1,150997 |
| Q9BWH6 | RNA polymerase II-associated protein 1 OS=Homo sapiens OX=9606 GN=RPAP1 PE=1 SV=3                                 | 0,319309079  | 1,150813 |
| O43663 | Protein regulator of cytokinesis 1 OS=Homo sapiens OX=9606 GN=PRC1 PE=1 SV=2                                      | 0,222066847  | 1,150405 |
| P12004 | Proliferating cell nuclear antigen OS=Homo sapiens OX=9606 GN=PCNA PE=1 SV=1                                      | -0,119055947 | 1,149393 |
| P84077 | ADP-ribosylation factor 1 OS=Homo sapiens OX=9606 GN=ARF1 PE=1 SV=2                                               | 0,221858616  | 1,149146 |
| Q9BWM7 | Sideroflexin-3 OS=Homo sapiens OX=9606 GN=SF3X3 PE=1 SV=3                                                         | 0,123459683  | 1,148854 |
| Q9UBR2 | Cathepsin Z OS=Homo sapiens OX=9606 GN=CTSZ PE=1 SV=1                                                             | -0,167723461 | 1,148674 |
| P19338 | Nucleolin OS=Homo sapiens OX=9606 GN=NCL PE=1 SV=3                                                                | -0,08435336  | 1,148377 |
| Q6UB35 | Monofunctional C1-tetrahydrofolate synthase, mitochondrial OS=Homo sapiens OX=9606 GN=MTHFD1L PE=1 SV=1           | -0,198154331 | 1,147804 |
| Q01167 | Forkhead box protein K2 OS=Homo sapiens OX=9606 GN=FOKK2 PE=1 SV=3                                                | -0,489227811 | 1,146068 |
| P27707 | Deoxycytidine kinase OS=Homo sapiens OX=9606 GN=DCK PE=1 SV=1                                                     | -0,221128085 | 1,144733 |
| Q6P1N0 | Coiled-coil and C2 domain-containing protein 1A OS=Homo sapiens OX=9606 GN=CC2D1A PE=1 SV=1                       | -0,111015819 | 1,144053 |
| P04004 | Vitronectin OS=Homo sapiens OX=9606 GN=VTN PE=1 SV=1                                                              | 0,853583928  | 1,14396  |
| Q9HB71 | Calcylin-binding protein OS=Homo sapiens OX=9606 GN=CACYBP PE=1 SV=2                                              | 0,127992207  | 1,143812 |
| Q9UIF8 | Bromodomain adjacent to zinc finger domain protein 2B OS=Homo sapiens OX=9606 GN=BAZ2B PE=1 SV=3                  | 0,294244217  | 1,143786 |
| Q56P03 | E2F-associated phosphoprotein OS=Homo sapiens OX=9606 GN=EAPP PE=1 SV=4                                           | -0,488023243 | 1,143592 |
| O15228 | Dihydroxyacetone phosphate acyltransferase OS=Homo sapiens OX=9606 GN=GNPAT PE=1 SV=1                             | -0,118562165 | 1,143512 |
| P00558 | Phosphoglycerate kinase 1 OS=Homo sapiens OX=9606 GN=PGK1 PE=1 SV=3                                               | -0,090750283 | 1,143418 |
| A0M266 | Shootin-1 OS=Homo sapiens OX=9606 GN=SHTN1 PE=1 SV=4                                                              | 0,255802367  | 1,143373 |
| Q13501 | Sequestosome-1 OS=Homo sapiens OX=9606 GN=SQSTM1 PE=1 SV=1                                                        | -0,110873178 | 1,142234 |
| Q86Y79 | Probable peptidyl-tRNA hydrolase OS=Homo sapiens OX=9606 GN=PTRH1 PE=1 SV=1                                       | -0,487268234 | 1,14204  |
| Q5JVF3 | PCI domain-containing protein 2 OS=Homo sapiens OX=9606 GN=PCID2 PE=1 SV=2                                        | -0,118424631 | 1,141875 |
| P82932 | 28S ribosomal protein S6, mitochondrial OS=Homo sapiens OX=9606 GN=MRPS6 PE=1 SV=3                                | 0,220616379  | 1,141643 |
| Q9UL63 | Muskelin OS=Homo sapiens OX=9606 GN=MKLN1 PE=1 SV=2                                                               | -0,486682802 | 1,140835 |
| Q9NVD7 | Alpha-parvin OS=Homo sapiens OX=9606 GN=PARVA PE=1 SV=1                                                           | -0,133322031 | 1,140636 |
| Q8IWB1 | Inositol 1,4,5-trisphosphate receptor-interacting protein OS=Homo sapiens OX=9606 GN=ITPRIP PE=1 SV=1             | 0,255248229  | 1,140564 |
| Q5VWZ2 | Lysophospholipase-like protein 1 OS=Homo sapiens OX=9606 GN=LYPLAL1 PE=1 SV=3                                     | -0,254768141 | 1,138131 |
| Q14938 | Nuclear factor 1 X-type OS=Homo sapiens OX=9606 GN=NFIX PE=1 SV=2                                                 | 0,315555532  | 1,136364 |
| Q9UBB6 | Neurochondrin OS=Homo sapiens OX=9606 GN=NCDN PE=1 SV=1                                                           | -0,315549335 | 1,136341 |
| Q9NVZ3 | Adaptin ear-binding coat-associated protein 2 OS=Homo sapiens OX=9606 GN=NECAP2 PE=1 SV=1                         | 0,219723297  | 1,136254 |
| Q15047 | Histone-lysine N-methyltransferase SETDB1 OS=Homo sapiens OX=9606 GN=SETDB1 PE=1 SV=1                             | -0,483727029 | 1,134742 |
| O75494 | Serine/arginine-rich splicing factor 10 OS=Homo sapiens OX=9606 GN=SRSF10 PE=1 SV=1                               | -0,254060155 | 1,134544 |
| P20042 | Eukaryotic translation initiation factor 2 subunit 2 OS=Homo sapiens OX=9606 GN=EIF2S2 PE=1 SV=2                  | -0,106803549 | 1,131887 |
| Q95487 | Protein transport protein Sec24B OS=Homo sapiens OX=9606 GN=SEC24B PE=1 SV=2                                      | -0,126896932 | 1,131795 |
| Q8NBA8 | DTW domain-containing protein 2 OS=Homo sapiens OX=9606 GN=DTWD2 PE=1 SV=1                                        | -0,471542364 | 1,130357 |
| Q15139 | Serine/threonine-protein kinase D1 OS=Homo sapiens OX=9606 GN=PRKD1 PE=1 SV=2                                     | -0,265519624 | 1,129934 |
| O96013 | Serine/threonine-protein kinase PAK 4 OS=Homo sapiens OX=9606 GN=PAK4 PE=1 SV=1                                   | -0,165283033 | 1,12853  |
| O75351 | Vacuolar protein sorting-associated protein 4B OS=Homo sapiens OX=9606 GN=VPS4B PE=1 SV=2                         | 0,138464278  | 1,127721 |
| Q06136 | 3-ketodihydroxyphingosine reductase OS=Homo sapiens OX=9606 GN=KDSR PE=1 SV=1                                     | 0,313275428  | 1,127583 |
| P58546 | Myotrophin OS=Homo sapiens OX=9606 GN=MTPN PE=1 SV=2                                                              | -0,178215133 | 1,127061 |
| P07910 | Heterogeneous nuclear ribonucleoproteins C1/C2 OS=Homo sapiens OX=9606 GN=HNRNPC PE=1 SV=4                        | 0,117146038  | 1,126695 |
| P50749 | Ras association domain-containing protein 2 OS=Homo sapiens OX=9606 GN=RASSF2 PE=1 SV=1                           | -0,312721773 | 1,12545  |
| Q14116 | Interleukin-18 OS=Homo sapiens OX=9606 GN=IL18 PE=1 SV=1                                                          | 0,217901571  | 1,125273 |
| Q8TCJ2 | Dolichyl-diphosphooligosaccharide--protein glycosyltransferase subunit STT3B OS=Homo sapiens OX=9606 GN=STT3B PE= | -0,131714502 | 1,123803 |
| E9PRG8 | Uncharacterized protein C11orf98 OS=Homo sapiens OX=9606 GN=C11orf98 PE=4 SV=2                                    | -0,477956972 | 1,1228   |
| O60841 | Eukaryotic translation initiation factor 5B OS=Homo sapiens OX=9606 GN=EIF5B PE=1 SV=4                            | 0,077511004  | 1,122571 |
| Q9P2W9 | Syntaxin-18 OS=Homo sapiens OX=9606 GN=STX18 PE=1 SV=1                                                            | -0,476917295 | 1,120641 |
| Q9UMZ2 | Synergism gamma OS=Homo sapiens OX=9606 GN=SYNRG PE=1 SV=2                                                        | -0,217048323 | 1,120136 |
| Q05639 | Elongation factor 1-alpha 2 OS=Homo sapiens OX=9606 GN=EEF1A2 PE=1 SV=1                                           | 0,093153221  | 1,119451 |
| O15254 | Peroxisomal acyl-coenzyme A oxidase 3 OS=Homo sapiens OX=9606 GN=ACOX3 PE=1 SV=2                                  | -0,476138058 | 1,119022 |
| Q9BZC7 | ATP-binding cassette sub-family A member 2 OS=Homo sapiens OX=9606 GN=ABCA2 PE=1 SV=4                             | -0,475699946 | 1,118111 |
| Q16610 | Extracellular matrix protein 1 OS=Homo sapiens OX=9606 GN=ECM1 PE=1 SV=2                                          | 0,100079988  | 1,118105 |
| Q6NZY4 | Zinc finger CCHC domain-containing protein 8 OS=Homo sapiens OX=9606 GN=ZCCHC8 PE=1 SV=2                          | -0,250596994 | 1,117013 |
| P08581 | Hepatocyte growth factor receptor OS=Homo sapiens OX=9606 GN=MET PE=1 SV=4                                        | -0,474274866 | 1,115146 |
| P09104 | Gamma-enolase OS=Homo sapiens OX=9606 GN=ENO2 PE=1 SV=3                                                           | 0,137140197  | 1,114566 |
| O15143 | Actin-related protein 2/3 complex subunit 1B OS=Homo sapiens OX=9606 GN=ARPC1B PE=1 SV=3                          | -0,11610929  | 1,11443  |
| P51692 | Signal transducer and activator of transcription 5B OS=Homo sapiens OX=9606 GN=STAT5B PE=1 SV=2                   | -0,17653778  | 1,114375 |
| P67812 | Signal peptidase complex catalytic subunit SEC11A OS=Homo sapiens OX=9606 GN=SEC11A PE=1 SV=1                     | 0,193175468  | 1,113703 |
| Q9UNX3 | 60S ribosomal protein L26-like 1 OS=Homo sapiens OX=9606 GN=RPL26L1 PE=1 SV=1                                     | -0,151022942 | 1,112276 |
| Q53E16 | Programmed cell death protein 4 OS=Homo sapiens OX=9606 GN=PDCD4 PE=1 SV=2                                        | 0,473064059  | 1,112623 |
| Q9UNY4 | Transcription termination factor 2 OS=Homo sapiens OX=9606 GN=TTF2 PE=1 SV=2                                      | -0,472822781 | 1,11212  |
| Q86YN1 | Dolichyldiphosphatase 1 OS=Homo sapiens OX=9606 GN=DOLPP1 PE=2 SV=1                                               | -0,326147991 | 1,112063 |
| Q9BYD3 | 39S ribosomal protein L4, mitochondrial OS=Homo sapiens OX=9606 GN=MRPL4 PE=1 SV=1                                | 0,192829778  | 1,111343 |
| Q92820 | Gamma-glutamyl hydrolase OS=Homo sapiens OX=9606 GN=GGH PE=1 SV=2                                                 | -0,192561267 | 1,109511 |
| O60563 | Cyclin-T1 OS=Homo sapiens OX=9606 GN=CCNT1 PE=1 SV=1                                                              | 0,308523951  | 1,109275 |

|        |                                                                                                               |              |          |
|--------|---------------------------------------------------------------------------------------------------------------|--------------|----------|
| O43865 | S-adenosylhomocysteine hydrolase-like protein 1 OS=Homo sapiens OX=9606 GN=AHCLY1 PE=1 SV=2                   | 0,162872103  | 1,108715 |
| Q9H936 | Mitochondrial glutamate carrier 1 OS=Homo sapiens OX=9606 GN=SLC25A22 PE=1 SV=1                               | -0,162804165 | 1,108158 |
| Q96K21 | Abcsin1/NoCut checkpoint regulator OS=Homo sapiens OX=9606 GN=ZFYVE19 PE=1 SV=3                               | -0,470659896 | 1,107606 |
| O75882 | Attractin OS=Homo sapiens OX=9606 GN=ATRN PE=1 SV=2                                                           | 0,364081889  | 1,107071 |
| Q6DKK2 | Tetratricopeptide repeat protein 19, mitochondrial OS=Homo sapiens OX=9606 GN=TTC19 PE=1 SV=4                 | -0,377169052 | 1,1065   |
| Q55WX8 | Protein odr-4 homolog OS=Homo sapiens OX=9606 GN=ODR4 PE=1 SV=1                                               | 0,469988646  | 1,106204 |
| P12429 | Annexin A3 OS=Homo sapiens OX=9606 GN=ANXA3 PE=1 SV=3                                                         | 0,108002909  | 1,105832 |
| Q9HDC9 | Adipocyte plasma membrane-associated protein OS=Homo sapiens OX=9606 GN=APMAP PE=1 SV=2                       | -0,115323858 | 1,105164 |
| Q9GZP4 | PITH domain-containing protein 1 OS=Homo sapiens OX=9606 GN=PITHD1 PE=1 SV=1                                  | -0,307356122 | 1,104773 |
| P33764 | Protein S100-A3 OS=Homo sapiens OX=9606 GN=S100A3 PE=1 SV=1                                                   | 0,469199812  | 1,104554 |
| Q9Y4D7 | Plexin-D1 OS=Homo sapiens OX=9606 GN=PLXND1 PE=1 SV=3                                                         | 0,111366416  | 1,104097 |
| Q9UBM7 | 7-dehydrocholesterol reductase OS=Homo sapiens OX=9606 GN=DHCR7 PE=1 SV=1                                     | 0,191704415  | 1,103667 |
| Q49AR2 | UPF0489 protein C5orf22 OS=Homo sapiens OX=9606 GN=C5orf22 PE=1 SV=2                                          | -0,468716881 | 1,103543 |
| Q13609 | Deoxyribonuclease gamma OS=Homo sapiens OX=9606 GN=DNASE1L3 PE=1 SV=1                                         | -1,433977102 | 1,103146 |
| Q86W92 | Liprin-beta-1 OS=Homo sapiens OX=9606 GN=PPFIBP1 PE=1 SV=2                                                    | -0,081641327 | 1,102611 |
| P35080 | Profilin-2 OS=Homo sapiens OX=9606 GN=PFN2 PE=1 SV=3                                                          | 0,191375877  | 1,101429 |
| P0DN79 | Cystathionine beta-synthase-like protein OS=Homo sapiens OX=9606 GN=CBSL PE=1 SV=1                            | 0,306485193  | 1,101416 |
| Q8NS84 | Tetratricopeptide repeat protein 39C OS=Homo sapiens OX=9606 GN=TTCT39C PE=2 SV=2                             | 0,467258692  | 1,10049  |
| Q07817 | Bcl-2-like protein 1 OS=Homo sapiens OX=9606 GN=BCL2L1 PE=1 SV=1                                              | 0,306153826  | 1,100378 |
| P08240 | Signal recognition particle receptor subunit alpha OS=Homo sapiens OX=9606 GN=SRPRA PE=1 SV=2                 | -0,096291956 | 1,100049 |
| O95810 | Caveolae-associated protein 2 OS=Homo sapiens OX=9606 GN=CAVIN2 PE=1 SV=3                                     | -0,110976658 | 1,099344 |
| Q96FN4 | Copine-2 OS=Homo sapiens OX=9606 GN=CPNE2 PE=1 SV=3                                                           | -0,305869533 | 1,099002 |
| Q96FZ7 | Charged multivesicular body protein 6 OS=Homo sapiens OX=9606 GN=CHMP6 PE=1 SV=3                              | 0,305845156  | 1,098948 |
| P22392 | Nucleoside diphosphate kinase B OS=Homo sapiens OX=9606 GN=NME2 PE=1 SV=1                                     | -0,246868769 | 1,098711 |
| Q9NQX3 | Gephyrin OS=Homo sapiens OX=9606 GN=GPHN PE=1 SV=1                                                            | 0,213366061  | 1,098012 |
| Q9NYS0 | NF-kappa-B inhibitor-interacting Ras-like protein 1 OS=Homo sapiens OX=9606 GN=NKIRAS1 PE=1 SV=1              | 0,46595081   | 1,097747 |
| P23786 | Carnitine O-palmitoyltransferase 2, mitochondrial OS=Homo sapiens OX=9606 GN=CPT2 PE=1 SV=2                   | -0,174281281 | 1,097361 |
| O95989 | Diphosphoinositol polyphosphate phosphohydrolase 1 OS=Homo sapiens OX=9606 GN=NUDT3 PE=1 SV=1                 | 0,608009499  | 1,097251 |
| P07954 | Fumarate hydratase, mitochondrial OS=Homo sapiens OX=9606 GN=FB PE=1 SV=3                                     | -0,089589704 | 1,096177 |
| Q96D71 | RalBP1-associated Eps domain-containing protein 1 OS=Homo sapiens OX=9606 GN=REPS1 PE=1 SV=3                  | -0,213010295 | 1,095879 |
| O60645 | Exocyst complex component 3 OS=Homo sapiens OX=9606 GN=EXOC3 PE=1 SV=3                                        | 0,19049985   | 1,095463 |
| Q14790 | Caspase-8 OS=Homo sapiens OX=9606 GN=CASP8 PE=1 SV=1                                                          | -0,123562746 | 1,095437 |
| Q13112 | Spermatin assembly factor 1 subunit B OS=Homo sapiens OX=9606 GN=CHAF1B PE=1 SV=1                             | -0,304655273 | 1,09436  |
| Q8TB22 | Proteoglycan-associated protein 20 OS=Homo sapiens OX=9606 GN=SPATA20 PE=2 SV=3                               | -0,464271403 | 1,094221 |
| Q9UKM7 | Endoplasmic reticulum mannosyl-oligosaccharide 1,2-alpha-mannosidase OS=Homo sapiens OX=9606 GN=MAN1B1 PE=1   | 0,142289145  | 1,094143 |
| P61966 | AP-1 complex subunit sigma-1A OS=Homo sapiens OX=9606 GN=AP1S1 PE=1 SV=1                                      | -0,245907578 | 1,093318 |
| Q8WVJ2 | NudC domain-containing protein 2 OS=Homo sapiens OX=9606 GN=NUDC2 PE=1 SV=1                                   | -0,212580643 | 1,093303 |
| Q9HD20 | Manganese-transporting ATPase 13A1 OS=Homo sapiens OX=9606 GN=ATP13A1 PE=1 SV=2                               | -0,095811896 | 1,093275 |
| Q9Y5L4 | Mitochondrial import inner membrane translocase subunit Tim13 OS=Homo sapiens OX=9606 GN=TIMM13 PE=1 SV=1     | -0,245873751 | 1,093148 |
| O95249 | Golgi SNAP receptor complex member 1 OS=Homo sapiens OX=9606 GN=GOSR1 PE=1 SV=1                               | 0,190011836  | 1,092143 |
| Q8IVL5 | Prolyl 3-hydroxylase 2 OS=Homo sapiens OX=9606 GN=P3H2 PE=1 SV=1                                              | 0,280199533  | 1,090529 |
| Q8NC56 | LEM domain-containing protein 2 OS=Homo sapiens OX=9606 GN=LEM2 PE=1 SV=1                                     | 0,160603584  | 1,09015  |
| Q14166 | Tubulin--tyrosine ligase-like protein 12 OS=Homo sapiens OX=9606 GN=TTLL12 PE=1 SV=2                          | 0,118268543  | 1,089767 |
| Q9NWB6 | Arginine and glutamate-rich protein 1 OS=Homo sapiens OX=9606 GN=ARGLU1 PE=1 SV=1                             | 0,303462549  | 1,08976  |
| Q92552 | 28S ribosomal protein S27, mitochondrial OS=Homo sapiens OX=9606 GN=MRPS27 PE=1 SV=3                          | -0,461995651 | 1,089434 |
| P40227 | T-complex protein 1 subunit zeta OS=Homo sapiens OX=9606 GN=CCT6A PE=1 SV=3                                   | 0,088977292  | 1,086913 |
| Q06609 | DNA repair protein RAD51 homolog 1 OS=Homo sapiens OX=9606 GN=RAD51 PE=1 SV=1                                 | 0,263781136  | 1,086501 |
| P53582 | Methionine aminopeptidase 1 OS=Homo sapiens OX=9606 GN=METAP1 PE=1 SV=2                                       | 0,160145678  | 1,086411 |
| Q96H55 | Unconventional myosin-XIX OS=Homo sapiens OX=9606 GN=MYO19 PE=1 SV=2                                          | -0,460352388 | 1,085971 |
| O00299 | Chloride intracellular channel protein 1 OS=Homo sapiens OX=9606 GN=CLIC1 PE=1 SV=4                           | 0,095169591  | 1,084233 |
| Q9Y623 | Myosin-4 OS=Homo sapiens OX=9606 GN=MYH4 PE=2 SV=2                                                            | -0,933729066 | 1,084059 |
| Q8NA72 | Centrosomal protein POC5 OS=Homo sapiens OX=9606 GN=POC5 PE=1 SV=2                                            | -0,459355028 | 1,083867 |
| Q8WVW3 | Reticulon-4-interacting protein 1, mitochondrial OS=Homo sapiens OX=9606 GN=RTN4IP1 PE=1 SV=2                 | -0,459135991 | 1,083404 |
| O60499 | Syntaxin-10 OS=Homo sapiens OX=9606 GN=STX10 PE=1 SV=1                                                        | -0,459084133 | 1,083295 |
| Q9NRN9 | Methyltransferase-like protein 5 OS=Homo sapiens OX=9606 GN=METT15 PE=1 SV=1                                  | 0,243844243  | 1,082909 |
| Q14258 | E3 ubiquitin/ISG15 ligase TRIM25 OS=Homo sapiens OX=9606 GN=TRIM25 PE=1 SV=2                                  | -0,088606579 | 1,081317 |
| O75844 | CAAX prenyl protease 1 homolog OS=Homo sapiens OX=9606 GN=ZMPSTE24 PE=1 SV=2                                  | 0,122242439  | 1,081134 |
| P27482 | Calmodulin-like protein 3 OS=Homo sapiens OX=9606 GN=CALML3 PE=1 SV=2                                         | 0,243447635  | 1,08091  |
| O75525 | #N/D                                                                                                          | -0,281408809 | 1,079792 |
| Q86X13 | Ankyrin repeat and LEM domain-containing protein 2 OS=Homo sapiens OX=9606 GN=ANKLE2 PE=1 SV=4                | -0,10267159  | 1,078107 |
| Q3KQU3 | MAP7 domain-containing protein 1 OS=Homo sapiens OX=9606 GN=MAP7D1 PE=1 SV=1                                  | -0,11713619  | 1,076999 |
| O75352 | Mannose-6-phosphate utilization defect 1 protein OS=Homo sapiens OX=9606 GN=MPDU1 PE=1 SV=2                   | -0,242525252 | 1,076261 |
| O43156 | TELO2-interacting protein 1 homolog OS=Homo sapiens OX=9606 GN=TTI1 PE=1 SV=3                                 | 0,14876019   | 1,076194 |
| Q9BUJ2 | Heterogeneous nuclear ribonucleoprotein U-like protein 1 OS=Homo sapiens OX=9606 GN=HNRNPUL1 PE=1 SV=2        | -0,084617936 | 1,075046 |
| Q9Y719 | Septin-5 OS=Homo sapiens OX=9606 GN=SEPTIN5 PE=1 SV=1                                                         | 0,542497921  | 1,073579 |
| Q9Y241 | HIG1 domain family member 1A, mitochondrial OS=Homo sapiens OX=9606 GN=HIGD1A PE=1 SV=1                       | 0,454233702  | 1,073032 |
| Q9NZM1 | Myoferlin OS=Homo sapiens OX=9606 GN=MYOF PE=1 SV=1                                                           | -0,038825913 | 1,07192  |
| Q86V81 | THO complex subunit 4 OS=Homo sapiens OX=9606 GN=ALYREF PE=1 SV=3                                             | -0,132751909 | 1,071271 |
| O00499 | Myc box-dependent-interacting protein 1 OS=Homo sapiens OX=9606 GN=BIN1 PE=1 SV=1                             | -0,105248035 | 1,071226 |
| O43396 | Thioredoxin-like protein 1 OS=Homo sapiens OX=9606 GN=TXNL1 PE=1 SV=3                                         | -0,126641571 | 1,071147 |
| P61812 | Transforming growth factor beta-2 proprotein OS=Homo sapiens OX=9606 GN=TGFBE2 PE=1 SV=1                      | 0,241493284  | 1,071062 |
| Q8WUP2 | Filamin-binding LIM protein 1 OS=Homo sapiens OX=9606 GN=FBLIM1 PE=1 SV=2                                     | -0,170685191 | 1,070369 |
| Q9ULAO | Aspartyl aminopeptidase OS=Homo sapiens OX=9606 GN=DNPEP PE=1 SV=1                                            | -0,148065066 | 1,070123 |
| Q99988 | Growth/differentiation factor 15 OS=Homo sapiens OX=9606 GN=GDF15 PE=1 SV=3                                   | -0,239704387 | 1,069891 |
| P08559 | Pyruvate dehydrogenase E1 component subunit alpha, somatic form, mitochondrial OS=Homo sapiens OX=9606 GN=PDH | -0,096514674 | 1,069142 |
| Q8IU8  | Ribosomal oxygenase 2 OS=Homo sapiens OX=9606 GN=RIOX2 PE=1 SV=1                                              | -0,297920033 | 1,068379 |
| O14602 | Eukaryotic translation initiation factor 1A, Y-chromosomal OS=Homo sapiens OX=9606 GN=EIF1AY PE=1 SV=4        | 0,174987601  | 1,067848 |
| Q9NWB7 | Intraflagellar transport protein 57 homolog OS=Homo sapiens OX=9606 GN=IFT57 PE=1 SV=1                        | 0,675258551  | 1,067845 |
| O00567 | Nucleolar protein 56 OS=Homo sapiens OX=9606 GN=NOP56 PE=1 SV=4                                               | -0,108354838 | 1,067525 |
| Q66K14 | TBC1 domain family member 9B OS=Homo sapiens OX=9606 GN=TBC1D9B PE=1 SV=3                                     | -0,120937677 | 1,067051 |
| Q15041 | ADP-ribosylation factor-like protein 6-interacting protein 1 OS=Homo sapiens OX=9606 GN=ARL6IP1 PE=1 SV=2     | -0,451336842 | 1,066881 |
| Q15643 | Thyroid receptor-interacting protein 11 OS=Homo sapiens OX=9606 GN=TRIP11 PE=1 SV=3                           | 0,157637019  | 1,065987 |
| Q96KR1 | Zinc finger RNA-binding protein OS=Homo sapiens OX=9606 GN=ZFR PE=1 SV=2                                      | -0,126020813 | 1,064752 |
| P09661 | U2 small nuclear ribonucleoprotein A' OS=Homo sapiens OX=9606 GN=SNRPA1 PE=1 SV=2                             | -0,157394059 | 1,064014 |
| Q13416 | Origin recognition complex subunit 2 OS=Homo sapiens OX=9606 GN=ORC2 PE=1 SV=2                                | -0,185780581 | 1,063443 |
| Q9BYX2 | TBC1 domain family member 2A OS=Homo sapiens OX=9606 GN=TBC1D2 PE=1 SV=3                                      | 0,089319332  | 1,062762 |
| Q96159 | Probable asparagine--tRNA ligase, mitochondrial OS=Homo sapiens OX=9606 GN=NARS2 PE=1 SV=3                    | -0,29642242  | 1,0626   |
| P35998 | 26S proteasome regulatory subunit 7 OS=Homo sapiens OX=9606 GN=PSMC2 PE=1 SV=3                                | -0,07921634  | 1,062193 |
| P00338 | L-lactate dehydrogenase A chain OS=Homo sapiens OX=9606 GN=LDAH PE=1 SV=2                                     | 0,095954585  | 1,061511 |
| Q9UNZ2 | NSFL1 cofactor p47 OS=Homo sapiens OX=9606 GN=NSFL1C PE=1 SV=2                                                | -0,098483734 | 1,06054  |
| Q9UHY8 | Fasciculation and elongation protein zeta-2 OS=Homo sapiens OX=9606 GN=FEZ2 PE=1 SV=2                         | -0,29558597  | 1,059371 |

|         |                                                                                                                 |              |          |
|---------|-----------------------------------------------------------------------------------------------------------------|--------------|----------|
| P10253  | Lysosomal alpha-glucosidase OS=Homo sapiens OX=9606 GN=GAA PE=1 SV=4                                            | -0,104109715 | 1,057023 |
| Q13247  | Serine/arginine-rich splicing factor 6 OS=Homo sapiens OX=9606 GN=SRSF6 PE=1 SV=2                               | -0,115347695 | 1,056921 |
| Q727F7  | 39S ribosomal protein L55, mitochondrial OS=Homo sapiens OX=9606 GN=MRLP55 PE=1 SV=1                            | -0,294853754 | 1,056545 |
| Q15746  | Myosin light chain kinase, smooth muscle OS=Homo sapiens OX=9606 GN=MYLK PE=1 SV=4                              | -0,09811499  | 1,055662 |
| O60232  | Protein ZNRD2 OS=Homo sapiens OX=9606 GN=ZNRD2 PE=1 SV=1                                                        | -0,094926708 | 1,055084 |
| Q9NZ01  | Very-long-chain enoyl-CoA reductase OS=Homo sapiens OX=9606 GN=TECR PE=1 SV=1                                   | -0,138044257 | 1,05469  |
| P03905  | NADH-ubiquinone oxidoreductase chain 4 OS=Homo sapiens OX=9606 GN=MT-ND4 PE=1 SV=1                              | -0,238108545 | 1,054003 |
| Q9Y6H1  | Coiled-coil-helix-coiled-coil-helix domain-containing protein 2 OS=Homo sapiens OX=9606 GN=CHCHD2 PE=1 SV=1     | -0,237899551 | 1,05298  |
| Q13309  | S-phase kinase-associated protein 2 OS=Homo sapiens OX=9606 GN=SKP2 PE=1 SV=2                                   | -0,412038012 | 1,052058 |
| P55010  | Eukaryotic translation initiation factor 5 OS=Homo sapiens OX=9606 GN=EIF5 PE=1 SV=2                            | -0,130699863 | 1,051186 |
| Q14956  | Transmembrane glycoprotein NMB OS=Homo sapiens OX=9606 GN=GPNMB PE=1 SV=2                                       | 0,443690219  | 1,050567 |
| Q9BU76  | Multiple myeloma tumor-associated protein 2 OS=Homo sapiens OX=9606 GN=MMTAG2 PE=1 SV=1                         | -0,293032006 | 1,049514 |
| Q15058  | Kinesin-like protein KIF14 OS=Homo sapiens OX=9606 GN=KIF14 PE=1 SV=1                                           | -0,237189754 | 1,049412 |
| P13716  | Delta-aminolevulinic acid dehydratase OS=Homo sapiens OX=9606 GN=ALAD PE=1 SV=1                                 | 0,292961005  | 1,04924  |
| Q9NZT2  | Opioid growth factor receptor OS=Homo sapiens OX=9606 GN=OGFR PE=1 SV=3                                         | -0,110477748 | 1,0485   |
| Q9Y6C9  | Mitochondrial carrier homolog 2 OS=Homo sapiens OX=9606 GN=MTCH2 PE=1 SV=1                                      | -0,130403285 | 1,048292 |
| Q6UVK1  | Chondroitin sulfate proteoglycan 4 OS=Homo sapiens OX=9606 GN=CSPG4 PE=1 SV=2                                   | -0,050769187 | 1,047886 |
| Q13308  | Inactive tyrosine-protein kinase 7 OS=Homo sapiens OX=9606 GN=PTK7 PE=1 SV=2                                    | -0,086328664 | 1,04713  |
| Q86YH6  | Decaprenyl-diphosphate synthase subunit 2 OS=Homo sapiens OX=9606 GN=PDS52 PE=1 SV=2                            | 0,442016533  | 1,046981 |
| Q86SX6  | Glutaredoxin-related protein 5, mitochondrial OS=Homo sapiens OX=9606 GN=GLRX5 PE=1 SV=2                        | -1,184727832 | 1,046387 |
| P54819  | Adenylate kinase 2, mitochondrial OS=Homo sapiens OX=9606 GN=AK2 PE=1 SV=2                                      | 0,130202303  | 1,046332 |
| P50452  | Serpin B8 OS=Homo sapiens OX=9606 GN=SERPINB8 PE=1 SV=2                                                         | -0,204618356 | 1,045753 |
| P49207  | 60S ribosomal protein L34 OS=Homo sapiens OX=9606 GN=RPL34 PE=1 SV=3                                            | -0,183155422 | 1,045715 |
| Q9GZT3  | SRA stem-loop-interacting RNA-binding protein, mitochondrial OS=Homo sapiens OX=9606 GN=SLIRP PE=1 SV=1         | -0,291771354 | 1,044648 |
| P68431  | Histone H3.1 OS=Homo sapiens OX=9606 GN=HIST1H3A PE=1 SV=2                                                      | -0,440667205 | 1,044068 |
| P35573  | Glycogen debranching enzyme OS=Homo sapiens OX=9606 GN=AGL PE=1 SV=3                                            | -0,182758965 | 1,043043 |
| Q722Z2  | Elongation factor-like GTPase 1 OS=Homo sapiens OX=9606 GN=EFL1 PE=1 SV=2                                       | -0,291268857 | 1,042708 |
| Q14331  | Protein FRG1 OS=Homo sapiens OX=9606 GN=FRG1 PE=1 SV=1                                                          | -0,154686158 | 1,042083 |
| Q2M2I8  | AP2-associated protein kinase 1 OS=Homo sapiens OX=9606 GN=AAK1 PE=1 SV=3                                       | 0,136436704  | 1,039849 |
| O75976  | Carboxypeptidase D OS=Homo sapiens OX=9606 GN=CPD PE=1 SV=2                                                     | 0,23524203   | 1,03963  |
| Q13895  | Bystin OS=Homo sapiens OX=9606 GN=BYSL PE=1 SV=3                                                                | -0,166555915 | 1,039565 |
| Q9Y446  | Plakophilin-3 OS=Homo sapiens OX=9606 GN=PKP3 PE=1 SV=1                                                         | -0,438286874 | 1,038972 |
| P22087  | rRNA 2'-O-methyltransferase fibrillar OS=Homo sapiens OX=9606 GN=PE=1 SV=2                                      | -0,136217792 | 1,037832 |
| Q9BXL7  | Caspase recruitment domain-containing protein 11 OS=Homo sapiens OX=9606 GN=CARD11 PE=1 SV=3                    | -0,437170022 | 1,036569 |
| Q58WW2  | DDB1- and CUL4-associated factor 6 OS=Homo sapiens OX=9606 GN=DCAF6 PE=1 SV=1                                   | -0,293577315 | 1,036278 |
| Q9BYE7  | Polycomb group RING finger protein 6 OS=Homo sapiens OX=9606 GN=PCGF6 PE=1 SV=2                                 | -0,436996464 | 1,036195 |
| Q9BXJ9  | N-alpha-acetyltransferase 15, NatA auxiliary subunit OS=Homo sapiens OX=9606 GN=NAA15 PE=1 SV=1                 | -0,074853335 | 1,033322 |
| P31483  | Nucleolin TIA-1 isoform p40 OS=Homo sapiens OX=9606 GN=TIA1 PE=1 SV=3                                           | -0,435233136 | 1,032395 |
| O00487  | 26S proteasome non-ATPase regulatory subunit 14 OS=Homo sapiens OX=9606 GN=PSMD14 PE=1 SV=1                     | -0,128749805 | 1,032196 |
| P18846  | Cyclic AMP-dependent transcription factor ATF-1 OS=Homo sapiens OX=9606 GN=ATF1 PE=1 SV=2                       | -0,082426015 | 1,032131 |
| Q29RF7  | Sister chromatid cohesion protein PDS5 homolog A OS=Homo sapiens OX=9606 GN=PDS5A PE=1 SV=1                     | -0,109017337 | 1,031594 |
| Q9Y5A7  | NEDD8 ultimate buster 1 OS=Homo sapiens OX=9606 GN=NUB1 PE=1 SV=2                                               | -0,202123962 | 1,030931 |
| Q12769  | Nuclear pore complex protein Nup160 OS=Homo sapiens OX=9606 GN=NUP160 PE=1 SV=3                                 | -0,091342315 | 1,030831 |
| Q15714  | TSC2 domain family protein 1 OS=Homo sapiens OX=9606 GN=TSC2D2 PE=1 SV=3                                        | 0,434866479  | 1,030664 |
| Q86X76  | Deaminated glutathione amidase OS=Homo sapiens OX=9606 GN=NIT1 PE=1 SV=2                                        | 0,233224768  | 1,029509 |
| P35222  | Catenin beta-1 OS=Homo sapiens OX=9606 GN=CTNNB1 PE=1 SV=1                                                      | 0,077186465  | 1,028724 |
| P35442  | Thrombospondin-2 OS=Homo sapiens OX=9606 GN=THBS2 PE=1 SV=2                                                     | 0,433424449  | 1,02849  |
| Q8WWQ1  | Soluble calcium-activated nucleotidase 1 OS=Homo sapiens OX=9606 GN=CANT1 PE=1 SV=1                             | -0,471833459 | 1,027895 |
| Q96BJ3  | Axin interactor, dorsalization-associated protein OS=Homo sapiens OX=9606 GN=AIDA PE=1 SV=1                     | -0,128288194 | 1,027714 |
| Q9P253  | Vacuolar protein sorting-associated protein 18 homolog OS=Homo sapiens OX=9606 GN=VPS18 PE=1 SV=2               | -0,180334596 | 1,026735 |
| Q727E8  | Ubiquitin-conjugating enzyme E2 Q1 OS=Homo sapiens OX=9606 GN=UBE2Q1 PE=1 SV=1                                  | -0,133892891 | 1,025751 |
| Q5MI27  | Serine/threonine-protein phosphatase 4 regulatory subunit 3B OS=Homo sapiens OX=9606 GN=PPP4R3B PE=1 SV=2       | 0,431904268  | 1,025204 |
| Q9UL15  | BAG family molecular chaperone regulator 5 OS=Homo sapiens OX=9606 GN=BAG5 PE=1 SV=1                            | -0,286520799 | 1,024377 |
| P37198  | Nuclear pore glycoprotein p62 OS=Homo sapiens OX=9606 GN=NUP62 PE=1 SV=3                                        | -0,152396843 | 1,02363  |
| Q15126  | Phosphomevalonate kinase OS=Homo sapiens OX=9606 GN=PMVK PE=1 SV=3                                              | -0,127696337 | 1,021976 |
| Q9BXU1  | Serine/threonine-protein kinase 31 OS=Homo sapiens OX=9606 GN=STK31 PE=2 SV=2                                   | 0,058143287  | 1,021974 |
| Q04721  | Neurogenic locus notch homolog protein 2 OS=Homo sapiens OX=9606 GN=NOTCH2 PE=1 SV=3                            | -0,231683501 | 1,021784 |
| P22314  | Ubiquitin-like modifier-activating enzyme 1 OS=Homo sapiens OX=9606 GN=UBA1 PE=1 SV=3                           | -0,056927672 | 1,020527 |
| Q86XN8  | RNA-binding protein MEX3D OS=Homo sapiens OX=9606 GN=MEX3D PE=1 SV=3                                            | -0,429717207 | 1,020469 |
| O14925  | Mitochondrial import inner membrane translocase subunit Tim23 OS=Homo sapiens OX=9606 GN=TIMM23 PE=1 SV=1       | -0,429619974 | 1,020258 |
| P78560  | Death domain-containing protein CRADD OS=Homo sapiens OX=9606 GN=CRADD PE=1 SV=1                                | -0,285211315 | 1,01932  |
| Q9NQY0  | Bridging integrator 3 OS=Homo sapiens OX=9606 GN=BIN3 PE=1 SV=1                                                 | -0,285091555 | 1,018858 |
| Q9Y6D6  | Brefeldin A-inhibited guanine nucleotide-exchange protein 1 OS=Homo sapiens OX=9606 GN=ARFGEP1 PE=1 SV=2        | 0,15441478   | 1,018134 |
| Q96N11  | Uncharacterized protein C7orf26 OS=Homo sapiens OX=9606 GN=C7orf26 PE=2 SV=1                                    | -0,140733453 | 1,018125 |
| P0C055  | Histone H2A.Z OS=Homo sapiens OX=9606 GN=H2AFZ PE=1 SV=2                                                        | -0,230912911 | 1,017924 |
| Q9HBH5  | Retinol dehydrogenase 14 OS=Homo sapiens OX=9606 GN=RDH14 PE=1 SV=1                                             | -0,199877035 | 1,017611 |
| Q13287  | N-myc-interactor OS=Homo sapiens OX=9606 GN=NMI PE=1 SV=2                                                       | 0,199871959  | 1,017581 |
| Q92759  | General transcription factor IIH subunit 4 OS=Homo sapiens OX=9606 GN=GTTF2H4 PE=1 SV=1                         | 0,230779884  | 1,017258 |
| Q32P41  | tRNA (guanine(37)-N1)-methyltransferase OS=Homo sapiens OX=9606 GN=TRMT5 PE=1 SV=2                              | -0,284519138 | 1,016648 |
| Q9UL03  | Integrator complex subunit 6 OS=Homo sapiens OX=9606 GN=INTS6 PE=1 SV=1                                         | -0,427791723 | 1,016292 |
| Q9NQC3  | Reticulon-4 OS=Homo sapiens OX=9606 GN=RTN4 PE=1 SV=2                                                           | -0,141819297 | 1,015971 |
| Q9NRF8  | CTP synthase 2 OS=Homo sapiens OX=9606 GN=CTPS2 PE=1 SV=1                                                       | 0,133831714  | 1,015918 |
| Q96ND0  | Protein FAM210A OS=Homo sapiens OX=9606 GN=FAM210A PE=1 SV=2                                                    | 0,427348007  | 1,015328 |
| P09110  | 3-ketoacyl-CoA thiolase, peroxisomal OS=Homo sapiens OX=9606 GN=ACAA1 PE=1 SV=2                                 | 0,151302124  | 1,014834 |
| P62906  | 60S ribosomal protein L10a OS=Homo sapiens OX=9606 GN=RPL10A PE=1 SV=2                                          | -0,133651615 | 1,014269 |
| Q96Q15  | Serine/threonine-protein kinase SMG1 OS=Homo sapiens OX=9606 GN=SMG1 PE=1 SV=3                                  | 0,230040424  | 1,013556 |
| Q8WUHQ  | Transmembrane protein 263 OS=Homo sapiens OX=9606 GN=TMEM263 PE=1 SV=1                                          | -0,283689269 | 1,013443 |
| Q9UL25  | Ras-related protein Rab-21 OS=Homo sapiens OX=9606 GN=RAB21 PE=1 SV=3                                           | -0,141511436 | 1,01332  |
| P15170  | Eukaryotic peptide chain release factor GTP-binding subunit ERF3A OS=Homo sapiens OX=9606 GN=GSPT1 PE=1 SV=1    | -0,100569442 | 1,013209 |
| Q18TAF3 | WD repeat-containing protein 48 OS=Homo sapiens OX=9606 GN=WDR48 PE=1 SV=1                                      | 0,198911589  | 1,011897 |
| Q9UQB8  | Brain-specific angiogenesis inhibitor 1-associated protein 2 OS=Homo sapiens OX=9606 GN=BAIAP2 PE=1 SV=1        | 0,080469039  | 1,010502 |
| Q969Q6  | Serine/threonine-protein phosphatase 2A regulatory subunit B'' subunit gamma OS=Homo sapiens OX=9606 GN=PPP2R3I | -0,424757974 | 1,009697 |
| Q13404  | Ubiquitin-conjugating enzyme E2 variant 1 OS=Homo sapiens OX=9606 GN=UBE2V1 PE=1 SV=2                           | -0,150634185 | 1,009476 |
| O00422  | Histone deacetylase complex subunit SAP18 OS=Homo sapiens OX=9606 GN=SAP18 PE=1 SV=1                            | 0,162390316  | 1,0087   |
| Q13951  | Core-binding factor subunit beta OS=Homo sapiens OX=9606 GN=CBFB PE=1 SV=2                                      | -0,177485553 | 1,007638 |
| P50542  | Peroxisomal targeting signal 1 receptor OS=Homo sapiens OX=9606 GN=PEX5 PE=1 SV=3                               | -0,423761706 | 1,007527 |
| P51617  | Interleukin-1 receptor-associated kinase 1 OS=Homo sapiens OX=9606 GN=IRAK1 PE=1 SV=2                           | -0,177447856 | 1,007385 |
| O95202  | Mitochondrial proton/calcium exchanger protein OS=Homo sapiens OX=9606 GN=LETM1 PE=1 SV=1                       | 0,106908808  | 1,007325 |
| Q06830  | Peroxioredoxin-1 OS=Homo sapiens OX=9606 GN=PRDX1 PE=1 SV=1                                                     | 0,106898706  | 1,007209 |
| Q9Y411  | Unconventional myosin-Va OS=Homo sapiens OX=9606 GN=MYO5A PE=1 SV=2                                             | -0,177220301 | 1,005863 |
| O94955  | Rho-related BTB domain-containing protein 3 OS=Homo sapiens OX=9606 GN=RHOBTB3 PE=1 SV=2                        | 0,281566347  | 1,005246 |

|        |                                                                                                                    |              |          |
|--------|--------------------------------------------------------------------------------------------------------------------|--------------|----------|
| P02794 | Ferritin heavy chain OS=Homo sapiens OX=9606 GN=FTH1 PE=1 SV=2                                                     | 0,161800292  | 1,004345 |
| Q14019 | Coactosin-like protein OS=Homo sapiens OX=9606 GN=COTL1 PE=1 SV=3                                                  | -0,14996866  | 1,004145 |
| P23381 | Tryptophan--tRNA ligase, cytoplasmic OS=Homo sapiens OX=9606 GN=WARS PE=1 SV=2                                     | -0,09980057  | 1,003765 |
| Q13425 | Beta-2-syntrophin OS=Homo sapiens OX=9606 GN=SNB2 PE=1 SV=1                                                        | -0,176841567 | 1,003331 |
| Q96B49 | Mitochondrial import receptor subunit TOM6 homolog OS=Homo sapiens OX=9606 GN=TOMM6 PE=1 SV=1                      | 0,421298956  | 1,002156 |
| P40763 | Signal transducer and activator of transcription 3 OS=Homo sapiens OX=9606 GN=STAT3 PE=1 SV=2                      | 0,069637449  | 1,00202  |
| Q9NRY6 | Phospholipid scramblase 3 OS=Homo sapiens OX=9606 GN=PLSCR3 PE=1 SV=2                                              | -0,421118064 | 1,001761 |
| Q9UIA9 | Exportin-7 OS=Homo sapiens OX=9606 GN=XPO7 PE=1 SV=3                                                               | -0,083232764 | 1,001209 |
| O14880 | Microsomal glutathione S-transferase 3 OS=Homo sapiens OX=9606 GN=MGST3 PE=1 SV=1                                  | 0,280372861  | 1,000637 |
| Q13011 | Delta(3,5)-Delta(2,4)-dienoyl-CoA isomerase, mitochondrial OS=Homo sapiens OX=9606 GN=ECH1 PE=1 SV=2               | -0,139910462 | 0,999564 |
| Q12846 | Syntaxin-4 OS=Homo sapiens OX=9606 GN=STX4 PE=1 SV=2                                                               | -0,196701196 | 0,998836 |
| P39748 | Flap endonuclease 1 OS=Homo sapiens OX=9606 GN=FEN1 PE=1 SV=1                                                      | -0,119557325 | 0,998802 |
| O15118 | NPC intracellular cholesterol transporter 1 OS=Homo sapiens OX=9606 GN=NPC1 PE=1 SV=2                              | -0,176099351 | 0,998373 |
| P13861 | cAMP-dependent protein kinase type II-alpha regulatory subunit OS=Homo sapiens OX=9606 GN=PRKAR2A PE=1 SV=2        | -0,106074545 | 0,997769 |
| O60282 | Kinesin heavy chain isoform 5C OS=Homo sapiens OX=9606 GN=KIF5C PE=1 SV=1                                          | -0,149139436 | 0,997512 |
| Q9C0J8 | pre-mRNA 3' end processing protein WDR33 OS=Homo sapiens OX=9606 GN=WDR33 PE=1 SV=2                                | 0,344905312  | 0,996589 |
| Q96FW1 | Ubiquitin thioesterase OTUB1 OS=Homo sapiens OX=9606 GN=OTUB1 PE=1 SV=2                                            | -0,119272227 | 0,99592  |
| Q9NXC5 | GATOR complex protein MIOS OS=Homo sapiens OX=9606 GN=MIOS PE=1 SV=2                                               | -0,417453574 | 0,993747 |
| O94964 | Protein SOGA1 OS=Homo sapiens OX=9606 GN=SOGA1 PE=1 SV=2                                                           | -0,148564101 | 0,992916 |
| Q99496 | E3 ubiquitin-protein ligase RING2 OS=Homo sapiens OX=9606 GN=RNFB2 PE=1 SV=1                                       | -0,195662047 | 0,992706 |
| Q69L93 | Kinesin-like protein KIF16B OS=Homo sapiens OX=9606 GN=KIF16B PE=1 SV=2                                            | 0,069367577  | 0,992117 |
| P04908 | Histone H2A type 1-B/E OS=Homo sapiens OX=9606 GN=HIST1H2AB PE=1 SV=2                                              | 0,225748203  | 0,992098 |
| P61981 | 14-3-3 protein gamma OS=Homo sapiens OX=9606 GN=YWHAG PE=1 SV=2                                                    | 0,109490249  | 0,991925 |
| Q8NEY1 | Neuron navigator 1 OS=Homo sapiens OX=9606 GN=NAV1 PE=1 SV=2                                                       | 0,148359837  | 0,991285 |
| Q99848 | Probable rRNA-processing protein EBP2 OS=Homo sapiens OX=9606 GN=EBNA1BP2 PE=1 SV=2                                | -0,138807127 | 0,990112 |
| P50897 | Palmitoyl-protein thioesterase 1 OS=Homo sapiens OX=9606 GN=PPT1 PE=1 SV=1                                         | 0,174769104  | 0,989498 |
| O43683 | Mitotic checkpoint serine/threonine-protein kinase BUB1 OS=Homo sapiens OX=9606 GN=BUB1 PE=1 SV=1                  | 0,441369408  | 0,988816 |
| O60763 | General vesicular transport factor p115 OS=Homo sapiens OX=9606 GN=USO1 PE=1 SV=2                                  | 0,092950652  | 0,988006 |
| Q96IX5 | ATP synthase membrane subunit DAPIT, mitochondrial OS=Homo sapiens OX=9606 GN=ATP5MD PE=1 SV=1                     | 0,414772187  | 0,987866 |
| Q99798 | Aconitate hydratase, mitochondrial OS=Homo sapiens OX=9606 GN=ACO2 PE=1 SV=2                                       | -0,080547599 | 0,986954 |
| O60869 | Endothelial differentiation-related factor 1 OS=Homo sapiens OX=9606 GN=EDF1 PE=1 SV=1                             | 0,138423097  | 0,986828 |
| Q86VX2 | COMM domain-containing protein 7 OS=Homo sapiens OX=9606 GN=COMM7 PE=1 SV=2                                        | 0,414298553  | 0,986826 |
| P18615 | Negative elongation factor E OS=Homo sapiens OX=9606 GN=NELFE PE=1 SV=3                                            | 0,130618819  | 0,986605 |
| Q9NWT1 | p21-activated protein kinase-interacting protein 1 OS=Homo sapiens OX=9606 GN=PAK1IP1 PE=1 SV=2                    | -0,414092377 | 0,986373 |
| Q6ZS25 | Rho guanine nucleotide exchange factor 18 OS=Homo sapiens OX=9606 GN=ARHGEF18 PE=1 SV=4                            | 0,276560424  | 0,985916 |
| P09960 | Leukotriene A-4 hydrolase OS=Homo sapiens OX=9606 GN=LTA4H PE=1 SV=2                                               | 0,0759159    | 0,985906 |
| P48556 | 26S proteasome non-ATPase regulatory subunit 8 OS=Homo sapiens OX=9606 GN=PSMD8 PE=1 SV=2                          | -0,11330695  | 0,985744 |
| P19784 | Casein kinase II subunit alpha' OS=Homo sapiens OX=9606 GN=CSNK2A2 PE=1 SV=1                                       | -0,174163123 | 0,985461 |
| Q9BUR5 | MICOS complex subunit MIC26 OS=Homo sapiens OX=9606 GN=APOO PE=1 SV=1                                              | -0,276220636 | 0,984603 |
| P45877 | Peptidyl-prolyl cis-trans isomerase C OS=Homo sapiens OX=9606 GN=PPIC PE=1 SV=1                                    | 0,275841686  | 0,983314 |
| Q8NBZ7 | UDP-glucuronic acid decarboxylase 1 OS=Homo sapiens OX=9606 GN=UXS1 PE=1 SV=1                                      | -0,626897699 | 0,982756 |
| Q16204 | Coiled-coil domain-containing protein 6 OS=Homo sapiens OX=9606 GN=CCDC6 PE=1 SV=2                                 | 0,117889484  | 0,981974 |
| P20839 | Inosine-5'-monophosphate dehydrogenase 1 OS=Homo sapiens OX=9606 GN=IMPDH1 PE=1 SV=2                               | 0,123533796  | 0,981863 |
| P13693 | Transcriptionally-controlled tumor protein OS=Homo sapiens OX=9606 GN=TPT1 PE=1 SV=1                               | 0,137700099  | 0,980651 |
| Q969X6 | U3 small nucleolar RNA-associated protein 4 homolog OS=Homo sapiens OX=9606 GN=UTP4 PE=1 SV=1                      | -0,411464747 | 0,980594 |
| Q14203 | Dynactin subunit 1 OS=Homo sapiens OX=9606 GN=DCTN1 PE=1 SV=3                                                      | 0,059961863  | 0,979984 |
| Q5W0Z9 | Palmitoyltransferase ZDHHC20 OS=Homo sapiens OX=9606 GN=ZDHHC20 PE=1 SV=1                                          | 0,063404288  | 0,978993 |
| Q92696 | Geranylgeranyl transferase type-2 subunit alpha OS=Homo sapiens OX=9606 GN=RABGGTA PE=1 SV=2                       | 0,274759729  | 0,978963 |
| Q8W0W1 | tRNA-splicing endonuclease subunit Sen15 OS=Homo sapiens OX=9606 GN=TSEN15 PE=1 SV=1                               | -0,410548807 | 0,978576 |
| P53609 | Geranylgeranyl transferase type-1 subunit beta OS=Homo sapiens OX=9606 GN=PGGT1B PE=1 SV=2                         | -0,410228607 | 0,977871 |
| Q9NR12 | PDZ and LIM domain protein 7 OS=Homo sapiens OX=9606 GN=PLIM7 PE=1 SV=1                                            | -0,097655991 | 0,977561 |
| Q12972 | Nuclear inhibitor of protein phosphatase 1 OS=Homo sapiens OX=9606 GN=PPP1R8 PE=1 SV=2                             | -0,273998509 | 0,976023 |
| P04844 | Dolichyl-diphosphooligosaccharide--protein glycosyltransferase subunit 2 OS=Homo sapiens OX=9606 GN=RPN2 PE=1 SV=1 | 0,089579832  | 0,975824 |
| Q8IYE0 | Coiled-coil domain-containing protein 146 OS=Homo sapiens OX=9606 GN=CCDC146 PE=1 SV=2                             | 0,514639249  | 0,973905 |
| Q14108 | Lysosome membrane protein 2 OS=Homo sapiens OX=9606 GN=SCARB2 PE=1 SV=2                                            | -0,129151174 | 0,973289 |
| Q15125 | 3-beta-hydroxysteroid-Delta(8),Delta(7)-isomerase OS=Homo sapiens OX=9606 GN=EBP PE=1 SV=3                         | 0,273078085  | 0,972469 |
| O75695 | Protein XRP2 OS=Homo sapiens OX=9606 GN=RP2 PE=1 SV=4                                                              | 0,157449531  | 0,972367 |
| Q96TA1 | Niban-like protein 1 OS=Homo sapiens OX=9606 GN=FAM129B PE=1 SV=3                                                  | -0,064200434 | 0,972366 |
| P39880 | Homeobox protein cut-like 1 OS=Homo sapiens OX=9606 GN=CUX1 PE=1 SV=3                                              | -0,407693928 | 0,972278 |
| Q9UBW8 | COP9 signalosome complex subunit 7a OS=Homo sapiens OX=9606 GN=COP57A PE=1 SV=1                                    | -0,221566028 | 0,971245 |
| Q9P287 | BRCA2 and CDKN1A-interacting protein OS=Homo sapiens OX=9606 GN=BCPIP PE=1 SV=1                                    | -0,221470705 | 0,970777 |
| O95861 | 3'((2'),5'-bisphosphate nucleotidase 1 OS=Homo sapiens OX=9606 GN=BPNT1 PE=1 SV=1                                  | 0,128759187  | 0,969741 |
| Q0ZG72 | Nexlin OS=Homo sapiens OX=9606 GN=NEXN PE=1 SV=1                                                                   | 0,406451987  | 0,969533 |
| Q9H4L4 | Sentrin-specific protease 3 OS=Homo sapiens OX=9606 GN=SEN3 PE=1 SV=2                                              | -0,22078545  | 0,967358 |
| Q96953 | Zinc finger protein 622 OS=Homo sapiens OX=9606 GN=ZNF622 PE=1 SV=1                                                | 0,405411074  | 0,967231 |
| O95456 | Proteasome assembly chaperone 1 OS=Homo sapiens OX=9606 GN=PSMG1 PE=1 SV=1                                         | -0,145246461 | 0,966514 |
| P40925 | Malate dehydrogenase, cytoplasmic OS=Homo sapiens OX=9606 GN=MDH1 PE=1 SV=4                                        | -0,103318796 | 0,966387 |
| Q9H8Y8 | Golgi reassembly-stacking protein 2 OS=Homo sapiens OX=9606 GN=GORASP2 PE=1 SV=3                                   | 0,135805971  | 0,964517 |
| P25786 | Proteasome subunit alpha type-1 OS=Homo sapiens OX=9606 GN=PSMA1 PE=1 SV=1                                         | -0,09105754  | 0,96361  |
| Q16799 | Reticulon-1 OS=Homo sapiens OX=9606 GN=RTN1 PE=1 SV=1                                                              | -0,403615718 | 0,963254 |
| Q12905 | Interleukin enhancer-binding factor 2 OS=Homo sapiens OX=9606 GN=ILF2 PE=1 SV=2                                    | 0,096362325  | 0,96185  |
| O60493 | Sorting nexin-3 OS=Homo sapiens OX=9606 GN=SNX3 PE=1 SV=3                                                          | -0,135441728 | 0,961422 |
| O15258 | Protein RER1 OS=Homo sapiens OX=9606 GN=RER1 PE=1 SV=1                                                             | 0,206075577  | 0,95934  |
| Q9BW71 | HIRA-interacting protein 3 OS=Homo sapiens OX=9606 GN=HIRP3 PE=1 SV=3                                              | 0,26901576   | 0,956786 |
| Q92905 | COP9 signalosome complex subunit 5 OS=Homo sapiens OX=9606 GN=COP55 PE=1 SV=4                                      | 0,120873721  | 0,956455 |
| Q9H173 | Nucleotide exchange factor SIL1 OS=Homo sapiens OX=9606 GN=SIL1 PE=1 SV=1                                          | 0,189486158  | 0,956411 |
| P42575 | Caspase-2 OS=Homo sapiens OX=9606 GN=CASP2 PE=1 SV=2                                                               | -0,169488253 | 0,954432 |
| Q96J02 | E3 ubiquitin-protein ligase Itchy homolog OS=Homo sapiens OX=9606 GN=ITCH PE=1 SV=2                                | -0,218101063 | 0,954009 |
| Q5QJ66 | Deoxy nucleotidyltransferase terminal-interacting protein 2 OS=Homo sapiens OX=9606 GN=DNTTIP2 PE=1 SV=2           | -0,218096861 | 0,953988 |
| P51570 | Galactokinase OS=Homo sapiens OX=9606 GN=GALK1 PE=1 SV=1                                                           | -0,092828401 | 0,953187 |
| P53384 | Cytosolic Fe-S cluster assembly factor NUBP1 OS=Homo sapiens OX=9606 GN=NUBP1 PE=1 SV=2                            | 0,143346412  | 0,951471 |
| Q9P2G1 | Ankyrin repeat and IBR domain-containing protein 1 OS=Homo sapiens OX=9606 GN=ANKIB1 PE=1 SV=3                     | 0,397683665  | 0,950073 |
| Q9UNE7 | E3 ubiquitin-protein ligase CHIP OS=Homo sapiens OX=9606 GN=STUB1 PE=1 SV=2                                        | 0,126577291  | 0,950052 |
| P34896 | Serine hydroxymethyltransferase, cytosolic OS=Homo sapiens OX=9606 GN=SHMT1 PE=1 SV=1                              | -0,217295905 | 0,950009 |
| P05141 | ADP/ATP translocase 2 OS=Homo sapiens OX=9606 GN=SLC25A5 PE=1 SV=7                                                 | -0,143004412 | 0,948769 |
| Q9UMX5 | Neudesin OS=Homo sapiens OX=9606 GN=NENF PE=1 SV=1                                                                 | -0,188134757 | 0,948501 |
| Q12888 | TP53-binding protein 1 OS=Homo sapiens OX=9606 GN=TP53BP1 PE=1 SV=2                                                | -0,089865513 | 0,948307 |
| Q9UFN0 | Protein NipSnap homolog 3A OS=Homo sapiens OX=9606 GN=NIPSNAP3A PE=1 SV=2                                          | -0,142745494 | 0,946725 |
| P62495 | Eukaryotic peptide chain release factor subunit 1 OS=Homo sapiens OX=9606 GN=ETF1 PE=1 SV=3                        | -0,083138301 | 0,946397 |
| Q99943 | 1-acyl-sn-glycerol-3-phosphate acyltransferase alpha OS=Homo sapiens OX=9606 GN=AGPAT1 PE=1 SV=2                   | 0,395823615  | 0,945926 |
| P49189 | 4-trimethylaminobutyraldehyde dehydrogenase OS=Homo sapiens OX=9606 GN=ALDH9A1 PE=1 SV=3                           | -0,105278464 | 0,945915 |

|        |                                                                                                                  |              |          |
|--------|------------------------------------------------------------------------------------------------------------------|--------------|----------|
| P49790 | Nuclear pore complex protein Nup153 OS=Homo sapiens OX=9606 GN=NUP153 PE=1 SV=2                                  | -0,098110501 | 0,945852 |
| Q9BUK6 | Protein misato homolog 1 OS=Homo sapiens OX=9606 GN=MSTO1 PE=1 SV=1                                              | -0,119756347 | 0,945836 |
| Q9NR45 | Sialic acid synthase OS=Homo sapiens OX=9606 GN=NANS PE=1 SV=2                                                   | -0,105248802 | 0,945593 |
| P63151 | Serine/threonine-protein phosphatase 2A 55 kDa regulatory subunit B alpha isoform OS=Homo sapiens OX=9606 GN=PPP | 0,098001552  | 0,944581 |
| Q9NQX4 | Unconventional myosin-Vc OS=Homo sapiens OX=9606 GN=MYO5C PE=1 SV=2                                              | 0,179251694  | 0,944393 |
| A9UHW6 | MIF4G domain-containing protein OS=Homo sapiens OX=9606 GN=MIF4GD PE=1 SV=1                                      | -0,39507622  | 0,944259 |
| O75964 | ATP synthase subunit g, mitochondrial OS=Homo sapiens OX=9606 GN=ATP5MG PE=1 SV=3                                | -0,265636909 | 0,943744 |
| Q8IX56 | Paralemmin-2 OS=Homo sapiens OX=9606 GN=PALM2 PE=1 SV=3                                                          | -0,394696859 | 0,943412 |
| Q1ED39 | Lysine-rich nucleolar protein 1 OS=Homo sapiens OX=9606 GN=KNOP1 PE=1 SV=1                                       | -0,265492372 | 0,943186 |
| Q08431 | Lactadherin OS=Homo sapiens OX=9606 GN=MFG8 PE=1 SV=3                                                            | 0,265324789  | 0,942539 |
| Q13393 | Phospholipase D1 OS=Homo sapiens OX=9606 GN=PLD1 PE=1 SV=1                                                       | -0,565167681 | 0,942251 |
| O95219 | Sorting nexin-4 OS=Homo sapiens OX=9606 GN=SNX4 PE=1 SV=1                                                        | -0,12568302  | 0,942012 |
| Q9Y4W2 | Ribosomal biogenesis protein LAS1L OS=Homo sapiens OX=9606 GN=LAS1L PE=1 SV=2                                    | -0,125663385 | 0,941836 |
| P54753 | Ephrin type-B receptor 3 OS=Homo sapiens OX=9606 GN=EPHB3 PE=1 SV=2                                              | 0,609669337  | 0,940351 |
| Q9Y5J7 | Mitochondrial import inner membrane translocase subunit Tim9 OS=Homo sapiens OX=9606 GN=TIMM9 PE=1 SV=1          | 0,393163915  | 0,939986 |
| O75147 | Obscure-like protein 1 OS=Homo sapiens OX=9606 GN=OBSL1 PE=1 SV=4                                                | -0,141881819 | 0,939914 |
| P49588 | Alanine--tRNA ligase, cytoplasmic OS=Homo sapiens OX=9606 GN=AARS PE=1 SV=2                                      | 0,060044099  | 0,939398 |
| P78371 | T-complex protein 1 subunit beta OS=Homo sapiens OX=9606 GN=CCT2 PE=1 SV=4                                       | -0,068111367 | 0,938903 |
| P35754 | Glutaredoxin-1 OS=Homo sapiens OX=9606 GN=GLRX PE=1 SV=2                                                         | 0,16713434   | 0,938887 |
| Q8IWW7 | E3 ubiquitin-protein ligase UBR1 OS=Homo sapiens OX=9606 GN=UBR1 PE=1 SV=1                                       | 0,113533713  | 0,938393 |
| P42695 | Condensin-2 complex subunit D3 OS=Homo sapiens OX=9606 GN=NCAPD3 PE=1 SV=2                                       | -0,152725467 | 0,937914 |
| P54760 | Ephrin type-B receptor 4 OS=Homo sapiens OX=9606 GN=EPHB4 PE=1 SV=2                                              | 0,214630002  | 0,936781 |
| Q9H3U1 | Protein unc-45 homolog A OS=Homo sapiens OX=9606 GN=UNC45A PE=1 SV=1                                             | 0,070205459  | 0,935732 |
| P04350 | Tubulin beta-4A chain OS=Homo sapiens OX=9606 GN=TUBB4A PE=1 SV=2                                                | 0,113181758  | 0,934895 |
| P17252 | Protein kinase C alpha type OS=Homo sapiens OX=9606 GN=PRKCA PE=1 SV=4                                           | -0,104235678 | 0,934618 |
| Q9UP83 | Conserved oligomeric Golgi complex subunit 5 OS=Homo sapiens OX=9606 GN=COG5 PE=1 SV=3                           | 0,263253652  | 0,934547 |
| Q9P000 | COMM domain-containing protein 9 OS=Homo sapiens OX=9606 GN=COMM9 PE=1 SV=2                                      | 0,124806558  | 0,93415  |
| P62834 | Ras-related protein Rap-1A OS=Homo sapiens OX=9606 GN=RAP1A PE=1 SV=1                                            | -0,390227601 | 0,933413 |
| P61916 | NPC intracellular cholesterol transporter 2 OS=Homo sapiens OX=9606 GN=NPC2 PE=1 SV=1                            | 0,165990321  | 0,931351 |
| Q96ME1 | F-box/LRR-repeat protein 18 OS=Homo sapiens OX=9606 GN=FBXL18 PE=1 SV=2                                          | -0,10389704  | 0,930958 |
| P41567 | Eukaryotic translation initiation factor 1 OS=Homo sapiens OX=9606 GN=EIF1 PE=1 SV=1                             | -0,140735712 | 0,930894 |
| Q96HE9 | Proline-rich protein 11 OS=Homo sapiens OX=9606 GN=PRR11 PE=1 SV=1                                               | -0,350360198 | 0,930004 |
| P07686 | Beta-hexosaminidase subunit beta OS=Homo sapiens OX=9606 GN=HEXB PE=1 SV=3                                       | -0,090938254 | 0,929717 |
| Q9P016 | Thymocyte nuclear protein 1 OS=Homo sapiens OX=9606 GN=THYN1 PE=1 SV=1                                           | 0,261774213  | 0,928838 |
| Q9UET6 | Putative tRNA (cytidine(32)/guanosine(34)-2'-O)-methyltransferase OS=Homo sapiens OX=9606 GN=FTSJ1 PE=1 SV=2     | -0,123070233 | 0,928734 |
| P35637 | RNA-binding protein FUS OS=Homo sapiens OX=9606 GN=FUS PE=1 SV=1                                                 | -0,13157566  | 0,928727 |
| P10768 | S-formylglutathione hydrolase OS=Homo sapiens OX=9606 GN=ESD PE=1 SV=2                                           | -0,112542239 | 0,928548 |
| Q9C0C9 | (E3-independent) E2 ubiquitin-conjugating enzyme OS=Homo sapiens OX=9606 GN=UBE2O PE=1 SV=3                      | 0,107771706  | 0,927899 |
| Q8IXQ6 | Protein mono-ADP-ribosyltransferase PARP9 OS=Homo sapiens OX=9606 GN=PARP9 PE=1 SV=2                             | 0,212800432  | 0,927717 |
| Q9UBT7 | Alpha-catulin OS=Homo sapiens OX=9606 GN=CTNNA1 PE=1 SV=2                                                        | 0,387522041  | 0,927342 |
| Q3B726 | DNA-directed RNA polymerase I subunit RPA43 OS=Homo sapiens OX=9606 GN=TWISTNB PE=1 SV=1                         | -0,387497885 | 0,927288 |
| Q9NQW7 | Xaa-Pro aminopeptidase 1 OS=Homo sapiens OX=9606 GN=XPNPEP1 PE=1 SV=3                                            | -0,107680756 | 0,926957 |
| Q9H8V3 | Protein ECT2 OS=Homo sapiens OX=9606 GN=ECT2 PE=1 SV=4                                                           | 0,212591516  | 0,926683 |
| Q14376 | UDP-glucose 4-epimerase OS=Homo sapiens OX=9606 GN=GALE PE=1 SV=2                                                | -0,151157546 | 0,926542 |
| C9JLW8 | Mapk-regulated corepressor-interacting protein 1 OS=Homo sapiens OX=9606 GN=MCRIPI1 PE=1 SV=1                    | -0,261074455 | 0,926138 |
| O75746 | Calcium-binding mitochondrial carrier protein Aralar1 OS=Homo sapiens OX=9606 GN=SLC25A12 PE=1 SV=2              | -0,103443731 | 0,926064 |
| Q96K76 | Ubiquitin carboxyl-terminal hydrolase 47 OS=Homo sapiens OX=9606 GN=USP47 PE=1 SV=3                              | 0,08575334   | 0,925421 |
| Q8N3V7 | Synaptotagmin OS=Homo sapiens OX=9606 GN=SYNPO PE=1 SV=2                                                         | 0,150944469  | 0,924999 |
| P52788 | Spermine synthase OS=Homo sapiens OX=9606 GN=SMS PE=1 SV=2                                                       | -0,090545591 | 0,924862 |
| Q9P2J5 | Leucine--tRNA ligase, cytoplasmic OS=Homo sapiens OX=9606 GN=LARS PE=1 SV=2                                      | -0,053056005 | 0,924803 |
| Q9BTE1 | Dynactin subunit 5 OS=Homo sapiens OX=9606 GN=DCTN5 PE=1 SV=1                                                    | -0,212205148 | 0,924771 |
| Q13620 | Cullin-4B OS=Homo sapiens OX=9606 GN=CUL4B PE=1 SV=4                                                             | 0,077891055  | 0,923448 |
| P80723 | Brain acid soluble protein 1 OS=Homo sapiens OX=9606 GN=BASP1 PE=1 SV=2                                          | -0,103168466 | 0,923095 |
| Q15691 | Microtubule-associated protein RP/EB family member 1 OS=Homo sapiens OX=9606 GN=MAPRE1 PE=1 SV=3                 | 0,093025792  | 0,921669 |
| Q16222 | UDP-N-acetylhexosamine pyrophosphorylase OS=Homo sapiens OX=9606 GN=UAP1 PE=1 SV=3                               | -0,074621702 | 0,921624 |
| Q8WWH5 | Probable tRNA pseudouridine synthase 1 OS=Homo sapiens OX=9606 GN=TRUB1 PE=1 SV=1                                | -0,183475983 | 0,921323 |
| O00461 | Golgi integral membrane protein 4 OS=Homo sapiens OX=9606 GN=GOLIM4 PE=1 SV=1                                    | -0,139488981 | 0,921106 |
| Q9BQE4 | Selenoprotein S OS=Homo sapiens OX=9606 GN=SELENOS PE=1 SV=3                                                     | 0,384032409  | 0,919493 |
| Q9Y5N6 | Origin recognition complex subunit 6 OS=Homo sapiens OX=9606 GN=ORC6 PE=1 SV=1                                   | 0,383767812  | 0,918897 |
| P40616 | ADP-ribosylation factor-like protein 1 OS=Homo sapiens OX=9606 GN=ARL1 PE=1 SV=1                                 | 0,183048005  | 0,918833 |
| Q9Y6M4 | Casein kinase I isoform gamma-3 OS=Homo sapiens OX=9606 GN=CSNK1G3 PE=1 SV=2                                     | -0,38363172  | 0,91859  |
| Q8TF30 | WASP homolog-associated protein with actin, membranes and microtubules OS=Homo sapiens OX=9606 GN=WHAMM P1       | -0,150363818 | 0,918581 |
| P83916 | Chromobox protein homolog 1 OS=Homo sapiens OX=9606 GN=CBX1 PE=1 SV=1                                            | 0,182999446  | 0,918551 |
| Q9H410 | Kinetochore-associated protein DSN1 homolog OS=Homo sapiens OX=9606 GN=DSN1 PE=1 SV=2                            | 0,382059379  | 0,918549 |
| Q08945 | FACT complex subunit SSRP1 OS=Homo sapiens OX=9606 GN=SSRP1 PE=1 SV=1                                            | 0,089951895  | 0,917536 |
| Q7Z3E2 | Coiled-coil domain-containing protein 186 OS=Homo sapiens OX=9606 GN=CCDC186 PE=1 SV=2                           | 0,382984079  | 0,91713  |
| Q96115 | Selenocysteine lyase OS=Homo sapiens OX=9606 GN=SCLY PE=1 SV=4                                                   | -0,382872953 | 0,91688  |
| Q5FWF5 | N-acetyltransferase ESCO1 OS=Homo sapiens OX=9606 GN=ESCO1 PE=1 SV=3                                             | -0,951205597 | 0,916817 |
| Q01085 | Nucleolysin TIAR OS=Homo sapiens OX=9606 GN=TIAL1 PE=1 SV=1                                                      | -0,122828474 | 0,916468 |
| Q9H6Z4 | Ran-binding protein 3 OS=Homo sapiens OX=9606 GN=RANBP3 PE=1 SV=1                                                | -0,09883191  | 0,9159   |
| P27348 | 14-3-3 protein theta OS=Homo sapiens OX=9606 GN=YWHAQ PE=1 SV=1                                                  | -0,102441208 | 0,915265 |
| Q9NRF2 | SH2B adapter protein 1 OS=Homo sapiens OX=9606 GN=SH2B1 PE=1 SV=3                                                | 0,196733823  | 0,915048 |
| A6NKF1 | SAC3 domain-containing protein 1 OS=Homo sapiens OX=9606 GN=SAC3D1 PE=1 SV=2                                     | -0,381720166 | 0,914279 |
| P36404 | ADP-ribosylation factor-like protein 2 OS=Homo sapiens OX=9606 GN=ARL2 PE=1 SV=4                                 | -0,163320499 | 0,913813 |
| Q92879 | CUGBP Elav-like family member 1 OS=Homo sapiens OX=9606 GN=CELF1 PE=1 SV=2                                       | -0,138402688 | 0,912598 |
| Q00013 | 55 kDa erythrocyte membrane protein OS=Homo sapiens OX=9606 GN=MPP1 PE=1 SV=2                                    | -0,149170113 | 0,912172 |
| Q8IWA4 | Mitofusin-1 OS=Homo sapiens OX=9606 GN=MFN1 PE=1 SV=3                                                            | -0,163050304 | 0,912043 |
| Q9UK99 | F-box only protein 3 OS=Homo sapiens OX=9606 GN=FBXO3 PE=1 SV=3                                                  | -0,380433116 | 0,911373 |
| Q9P2K8 | eIF-2-alpha kinase GCN2 OS=Homo sapiens OX=9606 GN=EIF2AK4 PE=1 SV=3                                             | -0,276932082 | 0,911188 |
| P49585 | Choline-phosphate cytidyltransferase A OS=Homo sapiens OX=9606 GN=PCYT1A PE=1 SV=2                               | -0,110752793 | 0,910885 |
| P51991 | Heterogeneous nuclear ribonucleoprotein A3 OS=Homo sapiens OX=9606 GN=HNRNPA3 PE=1 SV=2                          | -0,086905607 | 0,910615 |
| O75530 | Polycomb protein EED OS=Homo sapiens OX=9606 GN=EED PE=1 SV=2                                                    | -0,162773153 | 0,910226 |
| Q6PJ77 | Zinc finger CCHC domain-containing protein 14 OS=Homo sapiens OX=9606 GN=ZC3H14 PE=1 SV=1                        | 0,148770723  | 0,909291 |
| Q6NTF9 | Rhomboid domain-containing protein 2 OS=Homo sapiens OX=9606 GN=RHBD2 PE=2 SV=2                                  | 0,379285933  | 0,90878  |
| Q8WUQ7 | Cactin OS=Homo sapiens OX=9606 GN=CACTIN PE=1 SV=3                                                               | -0,379274766 | 0,908755 |
| P42773 | Cyclin-dependent kinase 4 inhibitor C OS=Homo sapiens OX=9606 GN=CDKN2C PE=1 SV=1                                | 0,208936238  | 0,908611 |
| P63279 | SUMO-conjugating enzyme UBC9 OS=Homo sapiens OX=9606 GN=UBE2I PE=1 SV=1                                          | 0,129150903  | 0,908366 |
| Q13428 | Treacle protein OS=Homo sapiens OX=9606 GN=TCOF1 PE=1 SV=3                                                       | 0,075201665  | 0,907811 |
| Q9B2J0 | Crooked neck-like protein 1 OS=Homo sapiens OX=9606 GN=CRNL1 PE=1 SV=4                                           | -0,162169899 | 0,906727 |
| P51452 | Dual specificity protein phosphatase 3 OS=Homo sapiens OX=9606 GN=DUSP3 PE=1 SV=1                                | 0,148298071  | 0,905883 |
| P12694 | 2-oxoisovalerate dehydrogenase subunit alpha, mitochondrial OS=Homo sapiens OX=9606 GN=BCKDHA PE=1 SV=2          | 0,37792206   | 0,905695 |

|         |                                                                                                                |              |          |
|---------|----------------------------------------------------------------------------------------------------------------|--------------|----------|
| P32298  | #N/D                                                                                                           | -1,208209776 | 0,905134 |
| O75880  | Protein SCO1 homolog, mitochondrial OS=Homo sapiens OX=9606 GN=SCO1 PE=1 SV=1                                  | -0,377646053 | 0,90507  |
| P53990  | IST1 homolog OS=Homo sapiens OX=9606 GN=IST1 PE=1 SV=1                                                         | 0,161871057  | 0,904321 |
| Q98WFF3 | RNA-binding protein 4 OS=Homo sapiens OX=9606 GN=RBM4 PE=1 SV=1                                                | -0,109941773 | 0,902859 |
| Q05707  | Collagen alpha-1(XIV) chain OS=Homo sapiens OX=9606 GN=COL14A1 PE=1 SV=3                                       | 0,601029394  | 0,902795 |
| Q9Y227  | Ectonucleoside triphosphate diphosphohydrolase 4 OS=Homo sapiens OX=9606 GN=ENTPD4 PE=1 SV=1                   | -0,376549017 | 0,902585 |
| Q075815 | Breast cancer anti-estrogen resistance protein 3 OS=Homo sapiens OX=9606 GN=BCAR3 PE=1 SV=1                    | -0,18022555  | 0,902445 |
| Q13542  | Eukaryotic translation initiation factor 4E-binding protein 2 OS=Homo sapiens OX=9606 GN=EIF4EBP2 PE=1 SV=1    | -0,136830228 | 0,90244  |
| P46108  | Adapter molecule crk OS=Homo sapiens OX=9606 GN=CRK PE=1 SV=2                                                  | 0,105294821  | 0,902327 |
| O43504  | Ragulator complex protein LAMTOR5 OS=Homo sapiens OX=9606 GN=LAMTOR5 PE=1 SV=1                                 | -0,254854839 | 0,902151 |
| Q92805  | Golgin subfamily A member 1 OS=Homo sapiens OX=9606 GN=GOLGA1 PE=1 SV=3                                        | -0,161414526 | 0,901336 |
| Q9P2T1  | GMP reductase 2 OS=Homo sapiens OX=9606 GN=GMPR2 PE=1 SV=1                                                     | 0,254619307  | 0,901243 |
| Q96544  | EKC/KEOPS complex subunit TP53RK OS=Homo sapiens OX=9606 GN=TP53RK PE=1 SV=2                                   | 0,375451256  | 0,900096 |
| P27694  | Replication protein A 70 kDa DNA-binding subunit OS=Homo sapiens OX=9606 GN=RPA1 PE=1 SV=2                     | -0,077939889 | 0,899878 |
| P48739  | Phosphatidylinositol transfer protein beta isoform OS=Homo sapiens OX=9606 GN=PITPNB PE=1 SV=2                 | 0,114642161  | 0,897632 |
| P52948  | Nuclear pore complex protein Nup98-Nup96 OS=Homo sapiens OX=9606 GN=NUP98 PE=1 SV=4                            | -0,074413707 | 0,896311 |
| Q96LD4  | E3 ubiquitin-protein ligase TRIM47 OS=Homo sapiens OX=9606 GN=TRIM47 PE=1 SV=2                                 | -0,109242182 | 0,89598  |
| P63313  | Thymosin beta-10 OS=Homo sapiens OX=9606 GN=TMSB10 PE=1 SV=2                                                   | 0,253243184  | 0,895938 |
| P52435  | DNA-directed RNA polymerase II subunit RPB11-a OS=Homo sapiens OX=9606 GN=POLR2J PE=1 SV=1                     | 0,206300106  | 0,895607 |
| Q9BVL2  | Nucleoporin p58/p45 OS=Homo sapiens OX=9606 GN=NUP58 PE=1 SV=1                                                 | -0,179034331 | 0,895545 |
| Q9BRT6  | Protein LLP homolog OS=Homo sapiens OX=9606 GN=LLPH PE=1 SV=1                                                  | -0,325771511 | 0,895485 |
| Q13586  | Stromal interaction molecule 1 OS=Homo sapiens OX=9606 GN=STIM1 PE=1 SV=3                                      | -0,17899819  | 0,895336 |
| O43374  | Ras GTPase-activating protein 4 OS=Homo sapiens OX=9606 GN=RASA4 PE=2 SV=2                                     | 0,503614385  | 0,895265 |
| Q15811  | Intersectin-1 OS=Homo sapiens OX=9606 GN=ITSN1 PE=1 SV=3                                                       | 0,120311311  | 0,894093 |
| Q724G1  | COMM domain-containing protein 6 OS=Homo sapiens OX=9606 GN=COMM6 PE=1 SV=1                                    | 0,252686686  | 0,893793 |
| P50502  | Hsc70-interacting protein OS=Homo sapiens OX=9606 GN=ST13 PE=1 SV=2                                            | 0,120090288  | 0,892135 |
| Q15181  | Inorganic pyrophosphatase OS=Homo sapiens OX=9606 GN=PPA1 PE=1 SV=2                                            | 0,093212937  | 0,889187 |
| Q9NW13  | RNA-binding protein 28 OS=Homo sapiens OX=9606 GN=RBM28 PE=1 SV=3                                              | 0,126786479  | 0,88862  |
| Q9UL46  | Proteasome activator complex subunit 2 OS=Homo sapiens OX=9606 GN=PSME2 PE=1 SV=4                              | 0,096351346  | 0,888314 |
| Q5JTH9  | RRP12-like protein OS=Homo sapiens OX=9606 GN=RRP12 PE=1 SV=2                                                  | -0,073798367 | 0,88736  |
| Q13049  | E3 ubiquitin-protein ligase TRIM32 OS=Homo sapiens OX=9606 GN=TRIM32 PE=1 SV=2                                 | -0,204525519 | 0,886866 |
| O76003  | Glutaredoxin-3 OS=Homo sapiens OX=9606 GN=GLRX3 PE=1 SV=2                                                      | 0,108252899  | 0,886278 |
| Q9HAV7  | GrpE protein homolog 1, mitochondrial OS=Homo sapiens OX=9606 GN=GRPEL1 PE=1 SV=2                              | -0,126411584 | 0,885499 |
| Q9BY42  | Replication termination factor 2 OS=Homo sapiens OX=9606 GN=RTF2 PE=1 SV=3                                     | 0,177053682  | 0,884092 |
| Q9Y243  | RAC-gamma serine/threonine-protein kinase OS=Homo sapiens OX=9606 GN=AKT3 PE=1 SV=1                            | -0,176983895 | 0,883689 |
| O00462  | Beta-mannosidase OS=Homo sapiens OX=9606 GN=MANBA PE=1 SV=3                                                    | -0,248313723 | 0,883037 |
| Q9NW64  | Pre-mRNA-splicing factor RBM22 OS=Homo sapiens OX=9606 GN=RBM22 PE=1 SV=1                                      | -0,203597448 | 0,8823   |
| Q16739  | Ceramide glucosyltransferase OS=Homo sapiens OX=9606 GN=UGCG PE=1 SV=1                                         | 0,367426596  | 0,881838 |
| Q8N568  | Serine/threonine-protein kinase DCLK2 OS=Homo sapiens OX=9606 GN=DCLK2 PE=1 SV=4                               | -0,0803308   | 0,881757 |
| Q9GZT8  | NIF3-like protein 1 OS=Homo sapiens OX=9606 GN=NIF3L1 PE=1 SV=2                                                | 0,125883516  | 0,881108 |
| Q9H3H3  | UPF0696 protein C11orf68 OS=Homo sapiens OX=9606 GN=C11orf68 PE=1 SV=3                                         | 0,134273103  | 0,880428 |
| P10321  | HLA class I histocompatibility antigen, Cw-7 alpha chain OS=Homo sapiens OX=9606 GN=HLA-C PE=1 SV=3            | 0,249124391  | 0,880067 |
| Q709C8  | Vacuolar protein sorting-associated protein 13C OS=Homo sapiens OX=9606 GN=VPS13C PE=1 SV=1                    | 0,082233461  | 0,879744 |
| O60725  | Protein-S-isoprenylcysteine O-methyltransferase OS=Homo sapiens OX=9606 GN=ICMT PE=1 SV=1                      | 0,366310695  | 0,87929  |
| Q9UJX2  | Cell division cycle protein 23 homolog OS=Homo sapiens OX=9606 GN=CDC23 PE=1 SV=3                              | 0,112672578  | 0,879244 |
| Q9NW88  | Integrator complex subunit 9 OS=Homo sapiens OX=9606 GN=INTS9 PE=1 SV=2                                        | 0,202939782  | 0,879066 |
| Q92556  | Engulfment and cell motility protein 1 OS=Homo sapiens OX=9606 GN=ELMO1 PE=1 SV=2                              | 0,366080708  | 0,878764 |
| P09914  | Interferon-induced protein with tetratricopeptide repeats 1 OS=Homo sapiens OX=9606 GN=IFIT1 PE=1 SV=2         | -0,08994917  | 0,878722 |
| Q9BT73  | Proteasome assembly chaperone 3 OS=Homo sapiens OX=9606 GN=PSMG3 PE=1 SV=1                                     | -0,176081239 | 0,878479 |
| P17900  | Ganglioside GM2 activator OS=Homo sapiens OX=9606 GN=GM2A PE=1 SV=4                                            | 0,357962329  | 0,878323 |
| Q9BW61  | DET1- and DDB1-associated protein 1 OS=Homo sapiens OX=9606 GN=DDA1 PE=1 SV=1                                  | -0,365782986 | 0,878084 |
| Q8N3F8  | MICAL-like protein 1 OS=Homo sapiens OX=9606 GN=MICAL1 PE=1 SV=2                                               | 0,248457438  | 0,877498 |
| Q00325  | Phosphate carrier protein, mitochondrial OS=Homo sapiens OX=9606 GN=SLC25A3 PE=1 SV=2                          | 0,107325546  | 0,877208 |
| Q9P0T7  | Transmembrane protein 9 OS=Homo sapiens OX=9606 GN=TMEM9 PE=1 SV=1                                             | -0,365283352 | 0,876942 |
| Q9UHG3  | Prenylcysteine oxidase 1 OS=Homo sapiens OX=9606 GN=PCYOX1 PE=1 SV=3                                           | 0,102811107  | 0,876878 |
| O00429  | Dynamin-1-like protein OS=Homo sapiens OX=9606 GN=DNM1L PE=1 SV=2                                              | 0,062384126  | 0,876323 |
| P05161  | Ubiquitin-like protein ISG15 OS=Homo sapiens OX=9606 GN=ISG15 PE=1 SV=5                                        | 0,247697332  | 0,87457  |
| Q5T1B0  | Axonemal dynein light chain domain-containing protein 1 OS=Homo sapiens OX=9606 GN=AXDND1 PE=2 SV=1            | -0,140260069 | 0,87455  |
| P26440  | Isovaleryl-CoA dehydrogenase, mitochondrial OS=Homo sapiens OX=9606 GN=IVD PE=1 SV=2                           | -0,364034344 | 0,874085 |
| P22670  | MHC class II regulatory factor RFX1 OS=Homo sapiens OX=9606 GN=RFX1 PE=1 SV=2                                  | 0,20189899   | 0,873952 |
| P13612  | Integrin alpha-4 OS=Homo sapiens OX=9606 GN=ITGA4 PE=1 SV=3                                                    | -1,055244813 | 0,873646 |
| Q8IY81  | Protein MB21D2 OS=Homo sapiens OX=9606 GN=MB21D2 PE=1 SV=3                                                     | -0,106807349 | 0,872151 |
| Q6PIU2  | Neutral cholesterol ester hydrolase 1 OS=Homo sapiens OX=9606 GN=NCEH1 PE=1 SV=3                               | -0,117795166 | 0,871868 |
| P41208  | Centrin-2 OS=Homo sapiens OX=9606 GN=CETN2 PE=1 SV=1                                                           | -0,156851123 | 0,871608 |
| O43427  | Acidic fibroblast growth factor intracellular-binding protein OS=Homo sapiens OX=9606 GN=FIBP PE=1 SV=3        | 0,362930484  | 0,871558 |
| P19404  | NADH dehydrogenase [ubiquinone] flavoprotein 2, mitochondrial OS=Homo sapiens OX=9606 GN=NDUFB2 PE=1 SV=2      | -0,156806001 | 0,871315 |
| P20645  | Cation-dependent mannose-6-phosphate receptor OS=Homo sapiens OX=9606 GN=M6PR PE=1 SV=1                        | 0,201208393  | 0,87056  |
| P50548  | ETS domain-containing transcription factor ERF OS=Homo sapiens OX=9606 GN=ERF PE=1 SV=2                        | 0,323600547  | 0,870216 |
| O75410  | Transforming acidic coiled-coil-containing protein 1 OS=Homo sapiens OX=9606 GN=TACC1 PE=1 SV=2                | -0,324509076 | 0,869926 |
| Q92608  | Dedicator of cytokinesis protein 2 OS=Homo sapiens OX=9606 GN=DOCK2 PE=1 SV=2                                  | -0,156570729 | 0,869788 |
| Q8TCT8  | Signal peptide peptidase-like 2A OS=Homo sapiens OX=9606 GN=SPPL2A PE=1 SV=2                                   | -0,36209557  | 0,869645 |
| Q7L4I2  | Arginine/serine-rich coiled-coil protein 2 OS=Homo sapiens OX=9606 GN=RSRC2 PE=1 SV=1                          | 0,362063236  | 0,869571 |
| O75794  | Cell division cycle protein 123 homolog OS=Homo sapiens OX=9606 GN=CDC123 PE=1 SV=1                            | -0,132860631 | 0,869488 |
| P53992  | Protein transport protein Sec24C OS=Homo sapiens OX=9606 GN=SEC24C PE=1 SV=3                                   | -0,075669496 | 0,868345 |
| P0C7P4  | #N/D                                                                                                           | -0,13270444  | 0,86828  |
| Q6ZT07  | TBC1 domain family member 9 OS=Homo sapiens OX=9606 GN=TBC1D9 PE=2 SV=2                                        | -0,360590486 | 0,866193 |
| Q8TF66  | Leucine-rich repeat-containing protein 15 OS=Homo sapiens OX=9606 GN=LRRC15 PE=2 SV=2                          | 0,091059034  | 0,864576 |
| P48735  | Isocitrate dehydrogenase [NADP], mitochondrial OS=Homo sapiens OX=9606 GN=IDH2 PE=1 SV=2                       | -0,085590321 | 0,864219 |
| Q96HP0  | #N/D                                                                                                           | 0,359426385  | 0,863521 |
| Q726K3  | Protein prenyltransferase alpha subunit repeat-containing protein 1 OS=Homo sapiens OX=9606 GN=PTAR1 PE=1 SV=2 | -0,244817648 | 0,863482 |
| Q8WXG9  | Adhesion G-protein coupled receptor V1 OS=Homo sapiens OX=9606 GN=ADGRV1 PE=1 SV=2                             | 0,547658917  | 0,863468 |
| Q9ULJ6  | Zinc finger MIZ domain-containing protein 1 OS=Homo sapiens OX=9606 GN=ZMIZ1 PE=1 SV=3                         | 0,921311666  | 0,863032 |
| Q6IA86  | Elongator complex protein 2 OS=Homo sapiens OX=9606 GN=ELP2 PE=1 SV=2                                          | -0,155179025 | 0,862618 |
| P61081  | NEDD8-conjugating enzyme Ubc12 OS=Homo sapiens OX=9606 GN=UBE2M PE=1 SV=1                                      | 0,123394365  | 0,860481 |
| Q9BQ24  | Zinc finger FYVE domain-containing protein 21 OS=Homo sapiens OX=9606 GN=ZFVYE21 PE=1 SV=1                     | -0,223509649 | 0,859979 |
| Q15424  | Scaffold attachment factor B1 OS=Homo sapiens OX=9606 GN=SAFB PE=1 SV=4                                        | 0,0767511    | 0,859225 |
| Q6KC79  | Nipped-B-like protein OS=Homo sapiens OX=9606 GN=NIPBL PE=1 SV=2                                               | -0,19869351  | 0,858225 |
| P34932  | Heat shock 70 kDa protein 4 OS=Homo sapiens OX=9606 GN=HSPA4 PE=1 SV=4                                         | -0,049843486 | 0,857294 |
| Q96GA7  | Serine dehydratase-like OS=Homo sapiens OX=9606 GN=SDSL PE=1 SV=1                                              | 0,122942229  | 0,856747 |
| P16150  | Leukosialin OS=Homo sapiens OX=9606 GN=SPN PE=1 SV=1                                                           | 0,356398488  | 0,85656  |
| P63098  | Calcineurin subunit B type 1 OS=Homo sapiens OX=9606 GN=PPP3R1 PE=1 SV=2                                       | 0,155074807  | 0,855621 |

|         |                                                                                                                       |              |          |
|---------|-----------------------------------------------------------------------------------------------------------------------|--------------|----------|
| Q8TBA6  | Golgin subfamily A member 5 OS=Homo sapiens OX=9606 GN=GOLGA5 PE=1 SV=3                                               | 0,242681829  | 0,855262 |
| P07942  | Laminin subunit beta-1 OS=Homo sapiens OX=9606 GN=LAMB1 PE=1 SV=2                                                     | 0,064046302  | 0,854469 |
| P51798  | H(+)/Cl(-) exchange transporter 7 OS=Homo sapiens OX=9606 GN=CLCN7 PE=1 SV=2                                          | 0,354538856  | 0,852276 |
| P26378  | ELAV-like protein 4 OS=Homo sapiens OX=9606 GN=ELAVL4 PE=1 SV=2                                                       | 0,241618437  | 0,851171 |
| Q8IWW9  | Codanin-1 OS=Homo sapiens OX=9606 GN=CDAN1 PE=1 SV=4                                                                  | -0,353902181 | 0,850809 |
| Q01995  | Transgelin OS=Homo sapiens OX=9606 GN=TAGLN PE=1 SV=4                                                                 | 0,089829292  | 0,85061  |
| Q99567  | Nuclear pore protein Nup88 OS=Homo sapiens OX=9606 GN=NUP88 PE=1 SV=2                                                 | 0,1219099    | 0,848236 |
| Q9Y6R0  | Numb-like protein OS=Homo sapiens OX=9606 GN=NUMBL PE=1 SV=1                                                          | -0,196539063 | 0,847678 |
| P04920  | Anion exchange protein 2 OS=Homo sapiens OX=9606 GN=SLC4A2 PE=1 SV=4                                                  | -0,352349792 | 0,847227 |
| Q8WUD4  | Coiled-coil domain-containing protein 12 OS=Homo sapiens OX=9606 GN=CCDC12 PE=1 SV=1                                  | 0,240559526  | 0,847098 |
| P46109  | Crk-like protein OS=Homo sapiens OX=9606 GN=CRKL PE=1 SV=1                                                            | -0,121751723 | 0,846934 |
| P62266  | 40S ribosomal protein S23 OS=Homo sapiens OX=9606 GN=RPS23 PE=1 SV=3                                                  | -0,170593261 | 0,846925 |
| P08238  | Heat shock protein HSP 90-beta OS=Homo sapiens OX=9606 GN=HSP90AB1 PE=1 SV=4                                          | 0,060604448  | 0,846254 |
| P46063  | ATP-dependent DNA helicase Q1 OS=Homo sapiens OX=9606 GN=RECQL PE=1 SV=3                                              | 0,068142018  | 0,845438 |
| Q9UIV1  | CCR4-NOT transcription complex subunit 7 OS=Homo sapiens OX=9606 GN=CNOT7 PE=1 SV=3                                   | -0,24008416  | 0,84527  |
| P30536  | Translocator protein OS=Homo sapiens OX=9606 GN=TSPO PE=1 SV=3                                                        | -0,195947961 | 0,844877 |
| Q56VL3  | OCIA domain-containing protein 2 OS=Homo sapiens OX=9606 GN=OCIAD2 PE=1 SV=1                                          | -0,114606051 | 0,843904 |
| Q69YQ0  | Cytospin-A OS=Homo sapiens OX=9606 GN=SPCC1L PE=1 SV=2                                                                | 0,239418771  | 0,842711 |
| Q92688  | Acidic leucine-rich nuclear phosphoprotein 32 family member B OS=Homo sapiens OX=9606 GN=ANP32B PE=1 SV=1             | -0,152326013 | 0,842336 |
| Q9Y4R8  | Telomere length regulation protein TEL2 homolog OS=Homo sapiens OX=9606 GN=TELO2 PE=1 SV=2                            | -0,103703381 | 0,842018 |
| Q9H5X1  | Cytosolic iron-sulfur assembly component 2A OS=Homo sapiens OX=9606 GN=CIAO2A PE=1 SV=1                               | 0,350016077  | 0,841834 |
| P45973  | Chromobox protein homolog 5 OS=Homo sapiens OX=9606 GN=CBX5 PE=1 SV=1                                                 | 0,152239333  | 0,841778 |
| Q12981  | Vesicle transport protein SEC20 OS=Homo sapiens OX=9606 GN=BNIP1 PE=1 SV=3                                            | 0,312105074  | 0,840142 |
| Q9HCG8  | Pre-mRNA-splicing factor CWC22 homolog OS=Homo sapiens OX=9606 GN=CWC22 PE=1 SV=3                                     | 0,194765736  | 0,839009 |
| Q9NUQ9  | Protein FAM49B OS=Homo sapiens OX=9606 GN=FAM49B PE=1 SV=1                                                            | 0,103382747  | 0,838921 |
| P49815  | Tuberin OS=Homo sapiens OX=9606 GN=TSC2 PE=1 SV=2                                                                     | -0,138855118 | 0,838421 |
| Q96566  | Chloride channel CLIC-like protein 1 OS=Homo sapiens OX=9606 GN=CLCC1 PE=1 SV=1                                       | 0,15149762   | 0,837    |
| Q9UK58  | Cyclin-L1 OS=Homo sapiens OX=9606 GN=CCNL1 PE=1 SV=1                                                                  | 0,3477193    | 0,836518 |
| P29353  | SHC-transforming protein 1 OS=Homo sapiens OX=9606 GN=SHC1 PE=1 SV=4                                                  | 0,108023152  | 0,836232 |
| P09429  | High mobility group protein B1 OS=Homo sapiens OX=9606 GN=HMGB1 PE=1 SV=3                                             | -0,11370086  | 0,836009 |
| P30876  | DNA-directed RNA polymerase II subunit RPB2 OS=Homo sapiens OX=9606 GN=POLR2B PE=1 SV=1                               | -0,113680774 | 0,835834 |
| Q03426  | Mevalonate kinase OS=Homo sapiens OX=9606 GN=MVK PE=1 SV=1                                                            | -0,347072547 | 0,835019 |
| Q8N8R5  | UPF0565 protein C2orf69 OS=Homo sapiens OX=9606 GN=C2orf69 PE=1 SV=1                                                  | -0,347037109 | 0,834937 |
| Q8N4H5  | Mitochondrial import receptor subunit TOM5 homolog OS=Homo sapiens OX=9606 GN=TOMM5 PE=1 SV=1                         | -0,346938668 | 0,834709 |
| Q9Y676  | 28S ribosomal protein S18b, mitochondrial OS=Homo sapiens OX=9606 GN=MRPS18B PE=1 SV=1                                | -0,346424569 | 0,833517 |
| P55884  | Eukaryotic translation initiation factor 3 subunit B OS=Homo sapiens OX=9606 GN=EIF3B PE=1 SV=3                       | -0,060701466 | 0,832479 |
| Q99757  | Thioredoxin, mitochondrial OS=Homo sapiens OX=9606 GN=TXN2 PE=1 SV=2                                                  | 0,145703108  | 0,83245  |
| P62070  | Ras-related protein R-Ras2 OS=Homo sapiens OX=9606 GN=RRAS2 PE=1 SV=1                                                 | 0,127990561  | 0,832017 |
| Q9NSI2  | Protein FAM207A OS=Homo sapiens OX=9606 GN=FAM207A PE=1 SV=2                                                          | -0,503179605 | 0,831068 |
| Q8WVX9  | Fatty acyl-CoA reductase 1 OS=Homo sapiens OX=9606 GN=FAR1 PE=1 SV=1                                                  | 0,167748145  | 0,83065  |
| Q00653  | Nuclear factor NF-kappa-B p100 subunit OS=Homo sapiens OX=9606 GN=NFKB2 PE=1 SV=4                                     | -0,344726183 | 0,829576 |
| P05166  | Propionyl-CoA carboxylase beta chain, mitochondrial OS=Homo sapiens OX=9606 GN=PCCB PE=1 SV=3                         | -0,23597476  | 0,829473 |
| Q15404  | Ras suppressor protein 1 OS=Homo sapiens OX=9606 GN=RSU1 PE=1 SV=3                                                    | 0,094236234  | 0,828202 |
| P29083  | General transcription factor IIE subunit 1 OS=Homo sapiens OX=9606 GN=GTTF2E1 PE=1 SV=2                               | -0,19243704  | 0,827646 |
| Q15025  | TNFAIP3-interacting protein 1 OS=Homo sapiens OX=9606 GN=TNIP1 PE=1 SV=2                                              | -0,343885545 | 0,827624 |
| Q9H3K6  | BolA-like protein 2 OS=Homo sapiens OX=9606 GN=BOLA2 PE=1 SV=1                                                        | -0,150027138 | 0,827546 |
| Q15650  | Activating signal cointegrator 1 OS=Homo sapiens OX=9606 GN=TRIP4 PE=1 SV=4                                           | 0,343767518  | 0,82735  |
| P08572  | Collagen alpha-2(IV) chain OS=Homo sapiens OX=9606 GN=COL4A2 PE=1 SV=4                                                | 0,343732681  | 0,827269 |
| Q6ZNC4  | Zinc finger protein 704 OS=Homo sapiens OX=9606 GN=ZNF704 PE=1 SV=1                                                   | 0,174605589  | 0,827083 |
| Q9Y6W3  | Calpain-7 OS=Homo sapiens OX=9606 GN=CAPN7 PE=1 SV=1                                                                  | -0,192265705 | 0,82681  |
| Q9NR31  | GTP-binding protein SAR1a OS=Homo sapiens OX=9606 GN=SAR1A PE=1 SV=1                                                  | 0,119298417  | 0,826801 |
| Q96HY7  | Probable 2-oxoglutarate dehydrogenase E1 component DHKTD1, mitochondrial OS=Homo sapiens OX=9606 GN=DHKTDL1           | -0,343400282 | 0,826497 |
| Q9Y4E1  | WASH complex subunit 2C OS=Homo sapiens OX=9606 GN=WASH2C PE=1 SV=4                                                   | 0,090688404  | 0,82621  |
| Q75175  | CCR4-NOT transcription complex subunit 3 OS=Homo sapiens OX=9606 GN=CNOT3 PE=1 SV=1                                   | -0,149768001 | 0,825882 |
| Q95983  | Methyl-CpG-binding domain protein 3 OS=Homo sapiens OX=9606 GN=MBD3 PE=1 SV=1                                         | 0,137072895  | 0,825821 |
| Q9UIJ7  | GTP:AMP phosphotransferase AK3, mitochondrial OS=Homo sapiens OX=9606 GN=AK3 PE=1 SV=4                                | -0,137060128 | 0,825731 |
| Q9GZQ3  | COMM domain-containing protein 5 OS=Homo sapiens OX=9606 GN=COMM5 PE=1 SV=1                                           | 0,234933612  | 0,825473 |
| P31946  | 14-3-3 protein beta/alpha OS=Homo sapiens OX=9606 GN=YWHAB PE=1 SV=3                                                  | 0,112432975  | 0,824981 |
| Q9Y2H2  | Phosphatidylinositol phosphatase SAC2 OS=Homo sapiens OX=9606 GN=INPP5F PE=1 SV=3                                     | -0,14961113  | 0,824875 |
| P18827  | Syndecan-1 OS=Homo sapiens OX=9606 GN=SDC1 PE=1 SV=3                                                                  | -0,234773837 | 0,824859 |
| Q13496  | Myotubularin OS=Homo sapiens OX=9606 GN=MTM1 PE=1 SV=2                                                                | -0,301226463 | 0,824821 |
| Q96HA7  | Tonsoku-like protein OS=Homo sapiens OX=9606 GN=TONSL PE=1 SV=2                                                       | 0,29949346   | 0,824307 |
| P62805  | Histone H4 OS=Homo sapiens OX=9606 GN=HIST1H4A PE=1 SV=2                                                              | 0,112293951  | 0,823774 |
| Q9Y2A7  | Nck-associated protein 1 OS=Homo sapiens OX=9606 GN=NCKAP1 PE=1 SV=1                                                  | -0,062120699 | 0,823684 |
| Q8WUX9  | Charged multivesicular body protein 7 OS=Homo sapiens OX=9606 GN=CHMP7 PE=1 SV=1                                      | 0,118882626  | 0,8234   |
| Q8WV41  | Sorting nexin-33 OS=Homo sapiens OX=9606 GN=SNX33 PE=1 SV=1                                                           | -0,191542307 | 0,823285 |
| P33176  | Kinesin-1 heavy chain OS=Homo sapiens OX=9606 GN=KIF5B PE=1 SV=1                                                      | -0,048141217 | 0,822142 |
| P06396  | Gelsolin OS=Homo sapiens OX=9606 GN=GSN PE=1 SV=1                                                                     | 0,07220263   | 0,820814 |
| O96011  | Peroxisomal membrane protein 11B OS=Homo sapiens OX=9606 GN=PEX11B PE=1 SV=1                                          | -0,340532472 | 0,819825 |
| P61201  | COP9 signalosome complex subunit 2 OS=Homo sapiens OX=9606 GN=COPS2 PE=1 SV=1                                         | 0,101304006  | 0,818916 |
| Q4V339  | COBW domain-containing protein 6 OS=Homo sapiens OX=9606 GN=CBWD6 PE=3 SV=1                                           | -0,339984691 | 0,818549 |
| Q96EE3  | Nucleoporin SEH1 OS=Homo sapiens OX=9606 GN=SEH1L PE=1 SV=3                                                           | 0,09685239   | 0,816623 |
| Q75131  | Copine-3 OS=Homo sapiens OX=9606 GN=CPNE3 PE=1 SV=1                                                                   | -0,081627836 | 0,816558 |
| P35241  | Radixin OS=Homo sapiens OX=9606 GN=RDX PE=1 SV=1                                                                      | -0,059683093 | 0,815749 |
| Q96H20  | Vacuolar-sorting protein SNF8 OS=Homo sapiens OX=9606 GN=SNF8 PE=1 SV=1                                               | -0,23218136  | 0,814904 |
| Q9NPA8  | Transcription and mRNA export factor ENY2 OS=Homo sapiens OX=9606 GN=ENY2 PE=1 SV=1                                   | -0,189804152 | 0,814824 |
| P48723  | Heat shock 70 kDa protein 13 OS=Homo sapiens OX=9606 GN=HSPA13 PE=1 SV=1                                              | 0,135508658  | 0,814797 |
| Q9P0U1  | [Pyruvate dehydrogenase [acetyl-transferring]]-phosphatase 1, mitochondrial OS=Homo sapiens OX=9606 GN=PDP1 PE=1 SV=1 | -0,338322906 | 0,814676 |
| Q6IAA8  | Regulator complex protein LAMTOR1 OS=Homo sapiens OX=9606 GN=LAMTOR1 PE=1 SV=2                                        | -0,135393381 | 0,813986 |
| Q96CM8  | Acyl-CoA synthetase family member 2, mitochondrial OS=Homo sapiens OX=9606 GN=ACSF2 PE=1 SV=2                         | 0,135269736  | 0,813116 |
| Q8IWIJ2 | GRIP and coiled-coil domain-containing protein 2 OS=Homo sapiens OX=9606 GN=GCC2 PE=1 SV=4                            | 0,164470113  | 0,811971 |
| Q8TEU7  | Rap guanine nucleotide exchange factor 6 OS=Homo sapiens OX=9606 GN=RAPGEF6 PE=1 SV=2                                 | 0,466872854  | 0,811674 |
| O15511  | Actin-related protein 2/3 complex subunit 5 OS=Homo sapiens OX=9606 GN=ARPC5 PE=1 SV=3                                | 0,147544662  | 0,811635 |
| Q75390  | Citrate synthase, mitochondrial OS=Homo sapiens OX=9606 GN=CS PE=1 SV=2                                               | -0,081199811 | 0,811454 |
| Q8IX04  | Ubiquitin-conjugating enzyme E2 variant 3 OS=Homo sapiens OX=9606 GN=UEVLD PE=1 SV=2                                  | -0,125286639 | 0,811382 |
| Q13111  | Chromatin assembly factor 1 subunit A OS=Homo sapiens OX=9606 GN=CHAF1A PE=1 SV=3                                     | -0,188945662 | 0,810649 |
| Q14C86  | GTPase-activating protein and VPS9 domain-containing protein 1 OS=Homo sapiens OX=9606 GN=GAPVD1 PE=1 SV=2            | 0,064568147  | 0,810483 |
| Q86X10  | Ral GTPase-activating protein subunit beta OS=Homo sapiens OX=9606 GN=RALGAPB PE=1 SV=1                               | 0,336429362  | 0,810257 |
| Q9NRY2  | SOSS complex subunit C OS=Homo sapiens OX=9606 GN=INIP PE=1 SV=1                                                      | -0,336114213 | 0,80952  |
| Q9ULV3  | Cip1-interacting zinc finger protein OS=Homo sapiens OX=9606 GN=CIZ1 PE=1 SV=2                                        | -0,230777373 | 0,809516 |
| Q6DHV7  | Adenosine deaminase-like protein OS=Homo sapiens OX=9606 GN=ADAL PE=2 SV=2                                            | 0,322463992  | 0,809379 |

|         |                                                                                                                   |              |          |
|---------|-------------------------------------------------------------------------------------------------------------------|--------------|----------|
| Q8TF05  | Serine/threonine-protein phosphatase 4 regulatory subunit 1 OS=Homo sapiens OX=9606 GN=PPP4R1 PE=1 SV=1           | 0,080996486  | 0,809032 |
| Q9Y6E0  | Serine/threonine-protein kinase 24 OS=Homo sapiens OX=9606 GN=STK24 PE=1 SV=1                                     | -0,124925069 | 0,808632 |
| Q96HQ2  | CDKN2AIP N-terminal-like protein OS=Homo sapiens OX=9606 GN=CDKN2AIPNL PE=1 SV=1                                  | -0,335564982 | 0,808237 |
| Q7Z3C6  | Autophagy-related protein 9A OS=Homo sapiens OX=9606 GN=ATG9A PE=1 SV=3                                           | 0,134486778  | 0,807614 |
| Q9UJW0  | Dynactin subunit 4 OS=Homo sapiens OX=9606 GN=DCTN4 PE=1 SV=1                                                     | -0,100034629 | 0,806761 |
| Q15532  | Protein S5XT OS=Homo sapiens OX=9606 GN=SS18 PE=1 SV=3                                                            | -0,334890672 | 0,806661 |
| P00390  | Glutathione reductase, mitochondrial OS=Homo sapiens OX=9606 GN=GSR PE=1 SV=2                                     | 0,083234908  | 0,806582 |
| P38571  | Lysosomal acid lipase/cholesteryl ester hydrolase OS=Homo sapiens OX=9606 GN=LIPA PE=1 SV=2                       | -0,187956288 | 0,805842 |
| Q9NVV7  | Pantothenate kinase 4 OS=Homo sapiens OX=9606 GN=PANK4 PE=1 SV=1                                                  | -0,334511042 | 0,805773 |
| P55212  | Caspase-6 OS=Homo sapiens OX=9606 GN=CASP6 PE=1 SV=2                                                              | -0,134164493 | 0,805351 |
| Q9Y5S2  | Serine/threonine-protein kinase MRCK beta OS=Homo sapiens OX=9606 GN=CDC42BPB PE=1 SV=2                           | 0,116468873  | 0,803727 |
| Q9Y3Y2  | Chromatin target of PRMT1 protein OS=Homo sapiens OX=9606 GN=CHTOP PE=1 SV=2                                      | 0,187417913  | 0,803228 |
| O76031  | ATP-dependent Clp protease ATP-binding subunit clpX-like, mitochondrial OS=Homo sapiens OX=9606 GN=CLPX PE=1 SV=1 | 0,099649326  | 0,803081 |
| Q7LBC6  | Lysine-specific demethylase 3B OS=Homo sapiens OX=9606 GN=KDM3B PE=1 SV=2                                         | -0,091789234 | 0,802691 |
| Q8NB37  | Glutamine amidotransferase-like class 1 domain-containing protein 1 OS=Homo sapiens OX=9606 GN=GATD1 PE=1 SV=1    | 0,134441214  | 0,801402 |
| Q9H4G0  | Band 4.1-like protein 1 OS=Homo sapiens OX=9606 GN=EPB41L1 PE=1 SV=2                                              | 0,116136527  | 0,801027 |
| P55210  | Caspase-7 OS=Homo sapiens OX=9606 GN=CASP7 PE=1 SV=1                                                              | 0,22856249   | 0,801019 |
| Q9Y5K8  | V-type proton ATPase subunit D OS=Homo sapiens OX=9606 GN=ATP6V1D PE=1 SV=1                                       | -0,186942439 | 0,80092  |
| Q9ULG6  | Cell cycle progression protein 1 OS=Homo sapiens OX=9606 GN=CCPG1 PE=1 SV=3                                       | -0,34703378  | 0,800112 |
| P30086  | Phosphatidylethanolamine-binding protein 1 OS=Homo sapiens OX=9606 GN=PBP1 PE=1 SV=3                              | 0,104040716  | 0,799833 |
| Q712K3  | Ubiquitin-conjugating enzyme E2 R2 OS=Homo sapiens OX=9606 GN=UBE2R2 PE=1 SV=1                                    | -0,162300065 | 0,799649 |
| O00764  | Pyridoxal kinase OS=Homo sapiens OX=9606 GN=PDXX PE=1 SV=1                                                        | -0,123566253 | 0,799317 |
| P62310  | U6 snRNA-associated Sm-like protein LSm3 OS=Homo sapiens OX=9606 GN=LSM3 PE=1 SV=2                                | -0,228136414 | 0,799385 |
| Q95070  | Protein YIF1A OS=Homo sapiens OX=9606 GN=YIF1A PE=1 SV=2                                                          | -0,331743422 | 0,799295 |
| Q9NVF7  | F-box only protein 28 OS=Homo sapiens OX=9606 GN=FBXO28 PE=1 SV=1                                                 | -0,331701316 | 0,799196 |
| Q9NYJ8  | TGF-beta-activated kinase 1 and MAP3K7-binding protein 2 OS=Homo sapiens OX=9606 GN=TAB2 PE=1 SV=1                | -0,339397895 | 0,799055 |
| P52597  | Heterogeneous nuclear ribonucleoprotein F OS=Homo sapiens OX=9606 GN=HNRNPF PE=1 SV=3                             | -0,088132514 | 0,798579 |
| P17405  | Sphingomyelin phosphodiesterase OS=Homo sapiens OX=9606 GN=SMPD1 PE=1 SV=5                                        | -0,123566253 | 0,798317 |
| Q15819  | Ubiquitin-conjugating enzyme E2 variant 2 OS=Homo sapiens OX=9606 GN=UBE2V2 PE=1 SV=4                             | -0,33083594  | 0,797168 |
| O95571  | Persulfide dioxygenase ETHE1, mitochondrial OS=Homo sapiens OX=9606 GN=ETHE1 PE=1 SV=2                            | -0,161811601 | 0,796888 |
| Q9ULP9  | TBC1 domain family member 24 OS=Homo sapiens OX=9606 GN=TBC1D24 PE=1 SV=2                                         | -0,052687978 | 0,796477 |
| P51948  | CDK-activating kinase assembly factor MAT1 OS=Homo sapiens OX=9606 GN=MNAT1 PE=1 SV=1                             | -0,330093391 | 0,795426 |
| P17858  | ATP-dependent 6-phosphofructokinase, liver type OS=Homo sapiens OX=9606 GN=PFKL PE=1 SV=6                         | -0,082260652 | 0,795361 |
| P63208  | S-phase kinase-associated protein 1 OS=Homo sapiens OX=9606 GN=SKP1 PE=1 SV=2                                     | 0,098837201  | 0,795338 |
| Q96MU7  | YTH domain-containing protein 1 OS=Homo sapiens OX=9606 GN=YTHDC1 PE=1 SV=3                                       | 0,329952336  | 0,795096 |
| Q96J92  | #N/D                                                                                                              | 0,186327628  | 0,794966 |
| Q6N069  | N-alpha-acetyltransferase 16, NatA auxiliary subunit OS=Homo sapiens OX=9606 GN=NAA16 PE=1 SV=2                   | 0,249271815  | 0,79447  |
| P02452  | Collagen alpha-1(I) chain OS=Homo sapiens OX=9606 GN=COL1A1 PE=1 SV=5                                             | 0,226795215  | 0,794243 |
| Q9UBL3  | Set1/Ash2 histone methyltransferase complex subunit ASH2 OS=Homo sapiens OX=9606 GN=ASH2L PE=1 SV=1               | -0,103377468 | 0,793811 |
| Q5J554  | Proteasome assembly chaperone 4 OS=Homo sapiens OX=9606 GN=PSMG4 PE=1 SV=5                                        | -0,226650828 | 0,793689 |
| Q15750  | TGF-beta-activated kinase 1 and MAP3K7-binding protein 1 OS=Homo sapiens OX=9606 GN=TAB1 PE=1 SV=1                | -0,328437805 | 0,791541 |
| Q07002  | Cyclin-dependent kinase 18 OS=Homo sapiens OX=9606 GN=CDK18 PE=1 SV=4                                             | 0,225991081  | 0,791161 |
| Q96L92  | Sorting nexin-27 OS=Homo sapiens OX=9606 GN=SNX27 PE=1 SV=2                                                       | 0,094298298  | 0,791142 |
| P50281  | Matrix metalloproteinase-14 OS=Homo sapiens OX=9606 GN=MMP14 PE=1 SV=3                                            | -0,114715732 | 0,78951  |
| Q9H3Z4  | DnaI homolog subfamily C member 5 OS=Homo sapiens OX=9606 GN=DNAJC5 PE=1 SV=1                                     | -0,326872238 | 0,787862 |
| P62995  | Transformer-2 protein homolog beta OS=Homo sapiens OX=9606 GN=TRA2B PE=1 SV=1                                     | -0,114505967 | 0,787813 |
| Q7Z7H5  | Transmembrane emp24 domain-containing protein 4 OS=Homo sapiens OX=9606 GN=TMED4 PE=1 SV=1                        | -0,15997283  | 0,786473 |
| P78559  | Microtubule-associated protein 1A OS=Homo sapiens OX=9606 GN=MAP1A PE=1 SV=6                                      | 0,040685666  | 0,78569  |
| Q9Y281  | Cofilin-2 OS=Homo sapiens OX=9606 GN=CFL2 PE=1 SV=1                                                               | -0,131315434 | 0,785411 |
| P13796  | Plastin-2 OS=Homo sapiens OX=9606 GN=LCP1 PE=1 SV=6                                                               | 0,159744199  | 0,785181 |
| P22307  | Non-specific lipid-transfer protein OS=Homo sapiens OX=9606 GN=SCLP2 PE=1 SV=2                                    | -0,102298154 | 0,784035 |
| Q9BQC3  | 2-{3-amino-3-carboxypropyl}histidine synthase subunit 2 OS=Homo sapiens OX=9606 GN=DPH2 PE=1 SV=1                 | -0,190854507 | 0,782617 |
| O76094  | Signal recognition particle subunit SRP72 OS=Homo sapiens OX=9606 GN=SRP72 PE=1 SV=3                              | 0,067866513  | 0,782553 |
| O00505  | Importin subunit alpha-4 OS=Homo sapiens OX=9606 GN=KPNA3 PE=1 SV=2                                               | 0,102128743  | 0,782504 |
| Q8WVW3  | U4/U6 small nuclear ribonucleoprotein Prp31 OS=Homo sapiens OX=9606 GN=PRPF31 PE=1 SV=2                           | 0,089828187  | 0,782398 |
| Q6UXN9  | WD repeat-containing protein 82 OS=Homo sapiens OX=9606 GN=WDR82 PE=1 SV=1                                        | 0,097456325  | 0,782216 |
| O00400  | Acetyl-coenzyme A transporter 1 OS=Homo sapiens OX=9606 GN=SLC3A1 PE=1 SV=1                                       | -0,459804733 | 0,780131 |
| Q9NT62  | Ubiquitin-like-conjugating enzyme ATG3 OS=Homo sapiens OX=9606 GN=ATG3 PE=1 SV=1                                  | -0,121085437 | 0,779563 |
| P46939  | Utrophin OS=Homo sapiens OX=9606 GN=UTRN PE=1 SV=2                                                                | -0,046003992 | 0,778612 |
| Q9COA0  | #N/D                                                                                                              | -0,153466512 | 0,778154 |
| Q5T1M5  | FK506-binding protein 15 OS=Homo sapiens OX=9606 GN=FKBP15 PE=1 SV=2                                              | 0,092887821  | 0,777161 |
| Q99797  | Mitochondrial intermediate peptidase OS=Homo sapiens OX=9606 GN=MIPPEP PE=1 SV=2                                  | -0,18197569  | 0,776872 |
| Q0VDG4  | Secernin-3 OS=Homo sapiens OX=9606 GN=SCRN3 PE=1 SV=1                                                             | -0,181804796 | 0,776046 |
| P15311  | Ezrin OS=Homo sapiens OX=9606 GN=EZR PE=1 SV=4                                                                    | -0,05814289  | 0,775945 |
| Q9NRL2  | Bromodomain adjacent to zinc finger domain protein 1A OS=Homo sapiens OX=9606 GN=BAZ1A PE=1 SV=2                  | -0,17548709  | 0,775398 |
| Q9Y2Q5  | Ragulator complex protein LAMTOR2 OS=Homo sapiens OX=9606 GN=LAMTOR2 PE=1 SV=1                                    | 0,321576281  | 0,77539  |
| Q9UNP9  | Peptidyl-prolyl cis-trans isomerase E OS=Homo sapiens OX=9606 GN=PPIE PE=1 SV=1                                   | -0,181646063 | 0,775279 |
| Q01196  | Runt-related transcription factor 1 OS=Homo sapiens OX=9606 GN=RUNX1 PE=1 SV=3                                    | 0,15787304   | 0,774619 |
| Q86WQ0  | Nuclear receptor 2C2-associated protein OS=Homo sapiens OX=9606 GN=NR2C2AP PE=1 SV=1                              | 0,22159894   | 0,77434  |
| P42126  | Enoyl-CoA delta isomerase 1, mitochondrial OS=Homo sapiens OX=9606 GN=ECI1 PE=1 SV=1                              | -0,119779636 | 0,769733 |
| Q9Y6E2  | Basic leucine zipper and W2 domain-containing protein 2 OS=Homo sapiens OX=9606 GN=BZW2 PE=1 SV=1                 | -0,088537378 | 0,769114 |
| P30044  | Peroxiredoxin-5, mitochondrial OS=Homo sapiens OX=9606 GN=PRDX5 PE=1 SV=4                                         | -0,105914115 | 0,768862 |
| Q9H773  | dCTP pyrophosphatase 1 OS=Homo sapiens OX=9606 GN=DCTPP1 PE=1 SV=1                                                | 0,100611571  | 0,76882  |
| P30419  | Glycylpeptide N-tetradecanoyltransferase 1 OS=Homo sapiens OX=9606 GN=NMT1 PE=1 SV=2                              | 0,088468008  | 0,768402 |
| Q15599  | Na(+)/H(+) exchange regulatory cofactor NHE-RF2 OS=Homo sapiens OX=9606 GN=SLC9A3R2 PE=1 SV=2                     | 0,095971763  | 0,768171 |
| Q9H7N4  | Splicing factor, arginine/serine-rich 19 OS=Homo sapiens OX=9606 GN=SCAF1 PE=1 SV=3                               | -0,180141328 | 0,768017 |
| Q69YH5  | Cell division cycle-associated protein 2 OS=Homo sapiens OX=9606 GN=CDCA2 PE=1 SV=2                               | 0,21992518   | 0,767936 |
| Q9Y3E5  | Peptidyl-tRNA hydrolase 2, mitochondrial OS=Homo sapiens OX=9606 GN=PTRH2 PE=1 SV=1                               | 0,180094217  | 0,76779  |
| Q92530  | Proteasome inhibitor PI31 subunit OS=Homo sapiens OX=9606 GN=PSMF1 PE=1 SV=2                                      | -0,156608453 | 0,767496 |
| Q8IVW4  | Cyclin-dependent kinase-like 3 OS=Homo sapiens OX=9606 GN=CDKL3 PE=1 SV=1                                         | -0,279691477 | 0,767466 |
| Q14746  | Conserved oligomeric Golgi complex subunit 2 OS=Homo sapiens OX=9606 GN=COG2 PE=1 SV=1                            | 0,156483209  | 0,767692 |
| Q9NY65  | #N/D                                                                                                              | -0,121771682 | 0,766626 |
| Q9NX46  | ADP-ribose glycohydrolase ARH3 OS=Homo sapiens OX=9606 GN=ADPRHL2 PE=1 SV=1                                       | 0,179825589  | 0,766494 |
| P51572  | B-cell receptor-associated protein 31 OS=Homo sapiens OX=9606 GN=BCAP31 PE=1 SV=3                                 | 0,091753711  | 0,765965 |
| P62424  | 60S ribosomal protein L7a OS=Homo sapiens OX=9606 GN=RPL7A PE=1 SV=2                                              | -0,085024673 | 0,765317 |
| Q8NFA0  | Ubiquitin carboxyl-terminal hydrolase 32 OS=Homo sapiens OX=9606 GN=USP32 PE=1 SV=1                               | -0,317142204 | 0,764914 |
| Q8WVWC4 | m-AAA protease-interacting protein 1, mitochondrial OS=Homo sapiens OX=9606 GN=MAIP1 PE=1 SV=1                    | -0,21910106  | 0,764784 |
| Q16539  | Mitogen-activated protein kinase 14 OS=Homo sapiens OX=9606 GN=MAPK14 PE=1 SV=3                                   | -0,11163151  | 0,764647 |
| Q12907  | Vesicular integral-membrane protein VIP36 OS=Homo sapiens OX=9606 GN=LMAN2 PE=1 SV=1                              | -0,105414171 | 0,764598 |
| Q6P5R6  | 60S ribosomal protein L22-like 1 OS=Homo sapiens OX=9606 GN=RPL22L1 PE=1 SV=2                                     | -0,31683005  | 0,764175 |
| P48059  | LIM and senescent cell antigen-like-containing domain protein 1 OS=Homo sapiens OX=9606 GN=LIMS1 PE=1 SV=4        | 0,139981287  | 0,763561 |

|        |                                                                                                                      |              |          |
|--------|----------------------------------------------------------------------------------------------------------------------|--------------|----------|
| P36639 | 7,8-dihydro-8-oxoguanine triphosphatase OS=Homo sapiens OX=9606 GN=NUDT1 PE=1 SV=3                                   | -0,139965961 | 0,763464 |
| Q01082 | Spectrin beta chain, non-erythrocytic 1 OS=Homo sapiens OX=9606 GN=SPTBN1 PE=1 SV=2                                  | -0,028408216 | 0,762054 |
| Q9HCH3 | Copine-5 OS=Homo sapiens OX=9606 GN=CPNE5 PE=1 SV=2                                                                  | -0,363979352 | 0,761685 |
| Q92575 | UBX domain-containing protein 4 OS=Homo sapiens OX=9606 GN=UBXN4 PE=1 SV=2                                           | -0,155515248 | 0,761349 |
| Q92538 | Golgi-specific brefeldin A-resistance guanine nucleotide exchange factor 1 OS=Homo sapiens OX=9606 GN=GBF1 PE=1 SV=1 | -0,067781272 | 0,761286 |
| P14373 | Zinc finger protein RFP OS=Homo sapiens OX=9606 GN=TRIM27 PE=1 SV=1                                                  | 0,357122993  | 0,761238 |
| O95400 | CD2 antigen cytoplasmic tail-binding protein 2 OS=Homo sapiens OX=9606 GN=CD2BP2 PE=1 SV=1                           | -0,118469493 | 0,75999  |
| Q01780 | Exosome component 10 OS=Homo sapiens OX=9606 GN=EXOSC10 PE=1 SV=2                                                    | -0,087503937 | 0,758522 |
| P50443 | Sulfate transporter OS=Homo sapiens OX=9606 GN=SLC26A2 PE=1 SV=2                                                     | 0,314441879  | 0,758519 |
| Q16762 | Thiosulfate sulfurtransferase OS=Homo sapiens OX=9606 GN=TST PE=1 SV=4                                               | -0,217299937 | 0,757899 |
| P50583 | Bis(5'-nucleosyl)-tetrakisphosphate [asymmetrical] OS=Homo sapiens OX=9606 GN=NUDT2 PE=1 SV=3                        | -0,177995619 | 0,757678 |
| P83876 | Thioredoxin-like protein 4A OS=Homo sapiens OX=9606 GN=TXNL4A PE=1 SV=1                                              | 0,177835109  | 0,756906 |
| Q9BRB3 | Phosphatidylinositol N-acetylglucosaminyltransferase subunit Q OS=Homo sapiens OX=9606 GN=PIGQ PE=1 SV=3             | 0,313727743  | 0,756826 |
| Q96GA3 | Protein LTV1 homolog OS=Homo sapiens OX=9606 GN=LTV1 PE=1 SV=1                                                       | -0,154682576 | 0,756672 |
| Q6P1M0 | Long-chain fatty acid transport protein 4 OS=Homo sapiens OX=9606 GN=SLC27A4 PE=1 SV=1                               | 0,216977052  | 0,756665 |
| P07711 | Cathepsin L1 OS=Homo sapiens OX=9606 GN=CTSL PE=1 SV=2                                                               | 0,216649292  | 0,755412 |
| Q96TC7 | Regulator of microtubule dynamics protein 3 OS=Homo sapiens OX=9606 GN=RMDN3 PE=1 SV=2                               | 0,216592447  | 0,755195 |
| P61224 | Ras-related protein Rap-1b OS=Homo sapiens OX=9606 GN=RAP1B PE=1 SV=1                                                | 0,126932318  | 0,754951 |
| Q9UKI2 | Cdc42 effector protein 3 OS=Homo sapiens OX=9606 GN=CDC42EP3 PE=1 SV=1                                               | -0,154342418 | 0,754763 |
| P62851 | 40S ribosomal protein S25 OS=Homo sapiens OX=9606 GN=RPS25 PE=1 SV=1                                                 | -0,312714793 | 0,754423 |
| Q9UJF2 | Ras GTPase-activating protein nGAP OS=Homo sapiens OX=9606 GN=RASAL2 PE=1 SV=2                                       | 0,154214256  | 0,754044 |
| Q9HOE9 | Bromodomain-containing protein 8 OS=Homo sapiens OX=9606 GN=BRD8 PE=1 SV=2                                           | -0,312490576 | 0,753891 |
| Q8NHU6 | Tudor domain-containing protein 7 OS=Homo sapiens OX=9606 GN=TDRD7 PE=1 SV=2                                         | 0,110253205  | 0,753597 |
| P61923 | Couator subunit zeta-1 OS=Homo sapiens OX=9606 GN=COPZ1 PE=1 SV=1                                                    | 0,126725275  | 0,753519 |
| Q9UH99 | SUN domain-containing protein 2 OS=Homo sapiens OX=9606 GN=SUN2 PE=1 SV=3                                            | -0,098869259 | 0,75318  |
| Q9P0K7 | Ankyrin OS=Homo sapiens OX=9606 GN=ANKK1 PE=1 SV=2                                                                   | -0,090295039 | 0,751626 |
| O60331 | Phosphatidylinositol 4-phosphate 5-kinase type-1 gamma OS=Homo sapiens OX=9606 GN=PIP5K1C PE=1 SV=2                  | 0,215445097  | 0,750812 |
| O43896 | Kinesin-like protein KIF1C OS=Homo sapiens OX=9606 GN=KIF1C PE=1 SV=3                                                | -0,215444955 | 0,750812 |
| Q9Y3B7 | 39S ribosomal protein L11, mitochondrial OS=Homo sapiens OX=9606 GN=MRPL11 PE=1 SV=1                                 | -0,215329183 | 0,750369 |
| Q9NQX4 | Exosome complex component RRP46 OS=Homo sapiens OX=9606 GN=EXOSC5 PE=1 SV=1                                          | -0,215306873 | 0,750284 |
| Q969X5 | Endoplasmic reticulum-Golgi intermediate compartment protein 1 OS=Homo sapiens OX=9606 GN=ERGIC1 PE=1 SV=1           | 0,137852723  | 0,750157 |
| O60518 | Ran-binding protein 6 OS=Homo sapiens OX=9606 GN=RANBP6 PE=1 SV=2                                                    | -0,109630301 | 0,748616 |
| Q9NVH1 | DnaJ homolog subfamily C member 11 OS=Homo sapiens OX=9606 GN=DNAJC11 PE=1 SV=2                                      | 0,214702458  | 0,747976 |
| Q5VVS8 | Terminal uridylyltransferase 7 OS=Homo sapiens OX=9606 GN=TUT7 PE=1 SV=1                                             | -0,309823172 | 0,747556 |
| Q9BQL6 | Fermitin family homolog 1 OS=Homo sapiens OX=9606 GN=FERMT1 PE=1 SV=1                                                | 0,159477025  | 0,747133 |
| Q15785 | Mitochondrial import receptor subunit TOM34 OS=Homo sapiens OX=9606 GN=TOMM34 PE=1 SV=2                              | 0,083255921  | 0,746552 |
| Q8IXO5 | Kelch-like protein 7 OS=Homo sapiens OX=9606 GN=KLHL7 PE=1 SV=2                                                      | 0,309347759  | 0,746425 |
| Q9H792 | Inactive tyrosine-protein kinase PEAK1 OS=Homo sapiens OX=9606 GN=PEAK1 PE=1 SV=4                                    | 0,309126261  | 0,745898 |
| P62873 | Guanine nucleotide-binding protein G(i)/G(s)/G(t) subunit beta-1 OS=Homo sapiens OX=9606 GN=GNB1 PE=1 SV=3           | 0,116572288  | 0,745716 |
| Q9UKL0 | REST corepressor 1 OS=Homo sapiens OX=9606 GN=RCOR1 PE=1 SV=2                                                        | -0,214026252 | 0,745395 |
| Q6IAN0 | Dehydrogenase/reductase SDR family member 7B OS=Homo sapiens OX=9606 GN=DHRS7B PE=1 SV=2                             | 0,213955948  | 0,745126 |
| Q08378 | Golgin subfamily A member 3 OS=Homo sapiens OX=9606 GN=GOLGA3 PE=1 SV=2                                              | 0,097946316  | 0,744928 |
| Q0PNE2 | Elongator complex protein 6 OS=Homo sapiens OX=9606 GN=ELP6 PE=1 SV=1                                                | 0,213450415  | 0,743197 |
| P83731 | 60S ribosomal protein L24 OS=Homo sapiens OX=9606 GN=RPL24 PE=1 SV=1                                                 | -0,136720357 | 0,743022 |
| O94888 | UBX domain-containing protein 7 OS=Homo sapiens OX=9606 GN=UBXN7 PE=1 SV=2                                           | -0,116192973 | 0,742883 |
| P46926 | Glucosamine-6-phosphate isomerase 1 OS=Homo sapiens OX=9606 GN=GNPDA1 PE=1 SV=1                                      | -0,093219281 | 0,742123 |
| Q9Y5X3 | Sorting nexin-5 OS=Homo sapiens OX=9606 GN=SNX5 PE=1 SV=1                                                            | -0,080059999 | 0,741871 |
| Q9UBQ6 | Exostosin-like 2 OS=Homo sapiens OX=9606 GN=EXTL2 PE=1 SV=1                                                          | -0,360079211 | 0,741307 |
| Q9UQ16 | Dynamin-3 OS=Homo sapiens OX=9606 GN=DNM3 PE=1 SV=4                                                                  | -0,499717673 | 0,741181 |
| P30041 | Peroxiredoxin-6 OS=Homo sapiens OX=9606 GN=PRDX6 PE=1 SV=3                                                           | 0,064808048  | 0,740875 |
| Q9Y312 | Protein AAR2 homolog OS=Homo sapiens OX=9606 GN=AAR2 PE=1 SV=2                                                       | 0,124856187  | 0,740617 |
| P15291 | Beta-1,4-galactosyltransferase 1 OS=Homo sapiens OX=9606 GN=B4GALT1 PE=1 SV=5                                        | -0,212612105 | 0,739998 |
| P49559 | Double-strand break repair protein MRE11 OS=Homo sapiens OX=9606 GN=MRE11 PE=1 SV=3                                  | 0,115430411  | 0,737202 |
| P62263 | 40S ribosomal protein S14 OS=Homo sapiens OX=9606 GN=RPS14 PE=1 SV=3                                                 | -0,124338062 | 0,737049 |
| Q9Y5P4 | Collagen type IV alpha-3-binding protein OS=Homo sapiens OX=9606 GN=COL4A3BP PE=1 SV=1                               | 0,11531862   | 0,73637  |
| O95071 | E3 ubiquitin-protein ligase UBR5 OS=Homo sapiens OX=9606 GN=UBR5 PE=1 SV=2                                           | -0,11525456  | 0,735894 |
| Q9UBQ0 | Vacuolar protein sorting-associated protein 29 OS=Homo sapiens OX=9606 GN=VPS29 PE=1 SV=1                            | -0,107985926 | 0,735504 |
| O95831 | Apoptosis-inducing factor 1, mitochondrial OS=Homo sapiens OX=9606 GN=AIFM1 PE=1 SV=1                                | 0,107937043  | 0,735115 |
| Q53GA4 | Pleckstrin homology-like domain family A member 2 OS=Homo sapiens OX=9606 GN=PHLDA2 PE=1 SV=2                        | -0,304539057 | 0,734974 |
| Q8TB52 | F-box only protein 30 OS=Homo sapiens OX=9606 GN=FBXO30 PE=1 SV=3                                                    | 0,15062138   | 0,733941 |
| O94776 | Metastasis-associated protein MTA2 OS=Homo sapiens OX=9606 GN=MTA2 PE=1 SV=1                                         | -0,06286236  | 0,732607 |
| P13804 | Electron transfer flavoprotein subunit alpha, mitochondrial OS=Homo sapiens OX=9606 GN=ETFA PE=1 SV=1                | 0,084895454  | 0,731952 |
| Q9Y3A6 | Transmembrane emp24 domain-containing protein 5 OS=Homo sapiens OX=9606 GN=TMED5 PE=1 SV=1                           | 0,840553122  | 0,731736 |
| Q9Y6G5 | COMM domain-containing protein 10 OS=Homo sapiens OX=9606 GN=COMM10 PE=1 SV=1                                        | -0,210226157 | 0,730899 |
| P78318 | Immunoglobulin-binding protein 1 OS=Homo sapiens OX=9606 GN=IGBP1 PE=1 SV=1                                          | -0,123411152 | 0,730675 |
| P52209 | 6-phosphogluconate dehydrogenase, decarboxylating OS=Homo sapiens OX=9606 GN=PGD PE=1 SV=3                           | -0,060233872 | 0,729836 |
| P22102 | Trifunctional purine biosynthetic protein adenosine-3 OS=Homo sapiens OX=9606 GN=GART PE=1 SV=1                      | -0,051268006 | 0,72965  |
| P40426 | Pre-B-cell leukemia transcription factor 3 OS=Homo sapiens OX=9606 GN=PBX3 PE=1 SV=1                                 | -0,302245272 | 0,7295   |
| Q9UID3 | Vacuolar protein sorting-associated protein 51 homolog OS=Homo sapiens OX=9606 GN=VPS51 PE=1 SV=2                    | -0,209752662 | 0,729094 |
| Q8N1G0 | Zinc finger protein 687 OS=Homo sapiens OX=9606 GN=ZNF687 PE=1 SV=1                                                  | 0,301787316  | 0,728406 |
| Q13595 | Transformer-2 protein homolog alpha OS=Homo sapiens OX=9606 GN=TRA2A PE=1 SV=1                                       | -0,171827092 | 0,728073 |
| P31146 | Coronin-1A OS=Homo sapiens OX=9606 GN=CORO1A PE=1 SV=4                                                               | -0,123012716 | 0,727939 |
| Q96552 | GPI transamidase component PIG-5 OS=Homo sapiens OX=9606 GN=PIGS PE=1 SV=3                                           | 0,101080191  | 0,727879 |
| Q9Y606 | tRNA pseudouridine synthase A OS=Homo sapiens OX=9606 GN=PUS1 PE=1 SV=3                                              | 0,301098411  | 0,727676 |
| Q96597 | Myeloid-associated differentiation marker OS=Homo sapiens OX=9606 GN=MYADM PE=1 SV=2                                 | 0,300685606  | 0,725773 |
| O43303 | Centriolar coiled-coil protein of 110 kDa OS=Homo sapiens OX=9606 GN=CCP110 PE=1 SV=3                                | 0,15889652   | 0,72543  |
| P31947 | 14-3-3 protein sigma OS=Homo sapiens OX=9606 GN=SFN PE=1 SV=1                                                        | 0,106514791  | 0,723819 |
| P04156 | Major prion protein OS=Homo sapiens OX=9606 GN=PRNP PE=1 SV=1                                                        | 0,208244991  | 0,72335  |
| Q9Y223 | Bifunctional UDP-N-acetylglucosamine 2-epimerase/N-acetylmannosamine kinase OS=Homo sapiens OX=9606 GN=GNE P         | -0,087312551 | 0,722521 |
| Q9BT78 | COP9 signalosome complex subunit 4 OS=Homo sapiens OX=9606 GN=COPS4 PE=1 SV=1                                        | -0,06969635  | 0,722408 |
| Q8IY22 | C-Maf-inducing protein OS=Homo sapiens OX=9606 GN=CMIP PE=1 SV=3                                                     | 0,207478989  | 0,720433 |
| Q9NTJ5 | Phosphatidylinositol phosphatase SAC1 OS=Homo sapiens OX=9606 GN=SACM1L PE=1 SV=2                                    | 0,095183152  | 0,720354 |
| P57088 | Transmembrane protein 33 OS=Homo sapiens OX=9606 GN=TMEM33 PE=1 SV=2                                                 | 0,147989965  | 0,719281 |
| Q8TED0 | U3 small nucleolar RNA-associated protein 15 homolog OS=Homo sapiens OX=9606 GN=UTP15 PE=1 SV=3                      | 0,207030999  | 0,718727 |
| O14530 | Thioredoxin domain-containing protein 9 OS=Homo sapiens OX=9606 GN=TXNDC9 PE=1 SV=2                                  | 0,105866639  | 0,718685 |
| Q00688 | Peptidyl-prolyl cis-trans isomerase FKBP3 OS=Homo sapiens OX=9606 GN=FKBP3 PE=1 SV=1                                 | -0,11293162  | 0,718653 |
| Q9N245 | CDGSH iron-sulfur domain-containing protein 1 OS=Homo sapiens OX=9606 GN=CISD1 PE=1 SV=1                             | 0,297330063  | 0,717744 |
| P10644 | cAMP-dependent protein kinase type I-alpha regulatory subunit OS=Homo sapiens OX=9606 GN=PRKAR1A PE=1 SV=1           | 0,08048299   | 0,717374 |
| P98170 | E3 ubiquitin-protein ligase XIAP OS=Homo sapiens OX=9606 GN=XIAP PE=1 SV=2                                           | 0,297082456  | 0,717151 |
| P41214 | Eukaryotic translation initiation factor 2D OS=Homo sapiens OX=9606 GN=EIF2D PE=1 SV=3                               | -0,099744988 | 0,716654 |
| Q9UN52 | COP9 signalosome complex subunit 3 OS=Homo sapiens OX=9606 GN=COPS3 PE=1 SV=3                                        | 0,080349579  | 0,715977 |

|        |                                                                                                                      |              |          |
|--------|----------------------------------------------------------------------------------------------------------------------|--------------|----------|
| P04216 | Thy-1 membrane glycoprotein OS=Homo sapiens OX=9606 GN=THY1 PE=1 SV=2                                                | 0,169233949  | 0,715681 |
| P03886 | NADH-ubiquinone oxidoreductase chain 1 OS=Homo sapiens OX=9606 GN=MT-ND1 PE=1 SV=1                                   | -0,296014094 | 0,714591 |
| Q5JRA6 | Transport and Golgi organization protein 1 homolog OS=Homo sapiens OX=9606 GN=MIA3 PE=1 SV=1                         | -0,121028533 | 0,714348 |
| P78362 | SRSF protein kinase 2 OS=Homo sapiens OX=9606 GN=SRPK2 PE=1 SV=3                                                     | 0,077462302  | 0,713362 |
| P55263 | Adenosine kinase OS=Homo sapiens OX=9606 GN=ADK PE=1 SV=2                                                            | -0,086368099 | 0,713364 |
| P23528 | Cofilin-1 OS=Homo sapiens OX=9606 GN=CFL1 PE=1 SV=3                                                                  | 0,074875382  | 0,711167 |
| Q9NVP1 | ATP-dependent RNA helicase DDX18 OS=Homo sapiens OX=9606 GN=DDX18 PE=1 SV=2                                          | -0,074856945 | 0,711464 |
| O75817 | Ribonuclease P protein subunit p20 OS=Homo sapiens OX=9606 GN=POP7 PE=1 SV=2                                         | 0,430362536  | 0,71061  |
| O43617 | Trafficking protein particle complex subunit 3 OS=Homo sapiens OX=9606 GN=TRAPP3 PE=1 SV=1                           | -0,13150029  | 0,710386 |
| Q96BD8 | Spindle and kinetochore-associated protein 1 OS=Homo sapiens OX=9606 GN=SKA1 PE=1 SV=1                               | -0,287909001 | 0,710053 |
| Q01518 | Adenylyl cyclase-associated protein 1 OS=Homo sapiens OX=9606 GN=CAP1 PE=1 SV=5                                      | -0,058777706 | 0,709057 |
| Q9H9B4 | Sideroflexin-1 OS=Homo sapiens OX=9606 GN=SFN1 PE=1 SV=4                                                             | -0,082617501 | 0,708946 |
| P49069 | Calcium signal-modulating cyclophilin ligand OS=Homo sapiens OX=9606 GN=CAMLG PE=1 SV=1                              | 0,15232214   | 0,708647 |
| Q15102 | Platelet-activating factor acetylhydrolase IB subunit gamma OS=Homo sapiens OX=9606 GN=PAFAH1B3 PE=1 SV=1            | 0,093847238  | 0,708545 |
| Q99627 | COP9 signalosome complex subunit 8 OS=Homo sapiens OX=9606 GN=COPS8 PE=1 SV=1                                        | -0,146055347 | 0,708538 |
| Q9BVC6 | Transmembrane protein 109 OS=Homo sapiens OX=9606 GN=TMEM109 PE=1 SV=1                                               | -0,204335278 | 0,70847  |
| O15382 | Branched-chain-amino-acid aminotransferase, mitochondrial OS=Homo sapiens OX=9606 GN=BCAT2 PE=1 SV=2                 | -0,167703958 | 0,708384 |
| Q5TGL8 | PX domain-containing protein 1 OS=Homo sapiens OX=9606 GN=PXDC1 PE=2 SV=3                                            | -0,293423862 | 0,708378 |
| Q96G23 | Ceramide synthase 2 OS=Homo sapiens OX=9606 GN=CERS2 PE=1 SV=1                                                       | 0,111528546  | 0,708292 |
| P59998 | Actin-related protein 2/3 complex subunit 4 OS=Homo sapiens OX=9606 GN=ARPC4 PE=1 SV=3                               | -0,120095452 | 0,707975 |
| P63220 | 40S ribosomal protein S21 OS=Homo sapiens OX=9606 GN=RPS21 PE=1 SV=1                                                 | -0,145861572 | 0,707463 |
| O00273 | DNA fragmentation factor subunit alpha OS=Homo sapiens OX=9606 GN=DFFA PE=1 SV=1                                     | 0,292989923  | 0,707336 |
| Q5TC12 | ATP synthase mitochondrial F1 complex assembly factor 1 OS=Homo sapiens OX=9606 GN=ATPAF1 PE=1 SV=1                  | -0,203831962 | 0,706556 |
| Q9H4M9 | EH domain-containing protein 1 OS=Homo sapiens OX=9606 GN=EHD1 PE=1 SV=2                                             | 0,05371014   | 0,706346 |
| Q95070 | Dynamin-2 OS=Homo sapiens OX=9606 GN=DNM2 PE=1 SV=2                                                                  | 0,059730991  | 0,706302 |
| O95819 | Mitogen-activated protein kinase kinase kinase kinase 4 OS=Homo sapiens OX=9606 GN=MAP4K4 PE=1 SV=2                  | -0,085625788 | 0,706188 |
| Q9BUL8 | Programmed cell death protein 10 OS=Homo sapiens OX=9606 GN=PDCD10 PE=1 SV=1                                         | -0,11121802  | 0,706002 |
| O95139 | NADH dehydrogenase [ubiquinone] 1 beta subcomplex subunit 6 OS=Homo sapiens OX=9606 GN=NDUFB6 PE=1 SV=3              | -0,203619358 | 0,705748 |
| Q9BW85 | Splicing factor YJU2 OS=Homo sapiens OX=9606 GN=YJU2 PE=1 SV=1                                                       | -0,166985128 | 0,70496  |
| Q9NX55 | Huntingtin-interacting protein K OS=Homo sapiens OX=9606 GN=HYPK PE=1 SV=2                                           | -0,291963019 | 0,704869 |
| Q9H061 | Transmembrane protein 126A OS=Homo sapiens OX=9606 GN=TMEM126A PE=1 SV=1                                             | -0,291886825 | 0,704686 |
| P36959 | #N/D                                                                                                                 | 0,042904925  | 0,704597 |
| Q9Y2E5 | Epididymis-specific alpha-mannosidase OS=Homo sapiens OX=9606 GN=MAN2B2 PE=1 SV=4                                    | -0,179566926 | 0,704327 |
| Q9NX63 | MICOS complex subunit MIC19 OS=Homo sapiens OX=9606 GN=CHCHD3 PE=1 SV=1                                              | -0,10399253  | 0,703887 |
| Q8N3X1 | Formin-binding protein 4 OS=Homo sapiens OX=9606 GN=FNBP4 PE=1 SV=3                                                  | 0,291425553  | 0,703578 |
| Q9Y5T5 | Ubiquitin carboxyl-terminal hydrolase 16 OS=Homo sapiens OX=9606 GN=USP16 PE=1 SV=1                                  | -0,119338992 | 0,702818 |
| P62491 | Ras-related protein Rab-11A OS=Homo sapiens OX=9606 GN=RAB11A PE=1 SV=3                                              | -0,081981397 | 0,702514 |
| P49916 | DNA ligase 3 OS=Homo sapiens OX=9606 GN=LIG3 PE=1 SV=2                                                               | -0,11074491  | 0,702517 |
| Q96HE7 | ERO1-like protein alpha OS=Homo sapiens OX=9606 GN=ERO1A PE=1 SV=2                                                   | 0,093108472  | 0,702035 |
| Q8WUY1 | Protein THEM6 OS=Homo sapiens OX=9606 GN=THEM6 PE=1 SV=2                                                             | -0,144814682 | 0,701664 |
| Q9HBL0 | Tensin-1 OS=Homo sapiens OX=9606 GN=TNS1 PE=1 SV=2                                                                   | -0,119146601 | 0,701508 |
| Q9NPE3 | H/ACA ribonucleoprotein complex subunit 3 OS=Homo sapiens OX=9606 GN=NOP10 PE=1 SV=1                                 | -0,290294782 | 0,700859 |
| Q9BVG3 | MKI67 FHA domain-interacting nucleolar phosphoprotein OS=Homo sapiens OX=9606 GN=NIFK PE=1 SV=1                      | -0,110473185 | 0,700517 |
| Q15014 | Mortality factor 4-like protein 2 OS=Homo sapiens OX=9606 GN=MORF4L2 PE=1 SV=1                                       | -0,290072077 | 0,700324 |
| O96028 | Histone-lysine N-methyltransferase NSD2 OS=Homo sapiens OX=9606 GN=NSD2 PE=1 SV=1                                    | -0,289885399 | 0,699875 |
| P06744 | Glucose-6-phosphate isomerase OS=Homo sapiens OX=9606 GN=GPI PE=1 SV=4                                               | -0,059262201 | 0,699812 |
| Q13596 | Sorting nexin-1 OS=Homo sapiens OX=9606 GN=SNX1 PE=1 SV=3                                                            | 0,088500237  | 0,698461 |
| P62917 | 60S ribosomal protein L8 OS=Homo sapiens OX=9606 GN=RPL8 PE=1 SV=2                                                   | 0,078642156  | 0,698167 |
| Q865R1 | Polypeptide N-acetylgalactosaminyltransferase 10 OS=Homo sapiens OX=9606 GN=GALNT10 PE=1 SV=2                        | -0,441131565 | 0,698138 |
| O75940 | Survival of motor neuron-related-splicing factor 30 OS=Homo sapiens OX=9606 GN=SMNDC1 PE=1 SV=1                      | 0,103124995  | 0,697062 |
| Q96AT9 | Ribulose-phosphate 3-epimerase OS=Homo sapiens OX=9606 GN=RPE PE=1 SV=1                                              | 0,165171548  | 0,696332 |
| Q9C0G0 | Zinc finger protein 407 OS=Homo sapiens OX=9606 GN=ZNF407 PE=1 SV=2                                                  | -0,491556613 | 0,696079 |
| O95478 | Ribosome biogenesis protein NSA2 homolog OS=Homo sapiens OX=9606 GN=NSA2 PE=1 SV=1                                   | -0,209877644 | 0,695803 |
| Q99447 | Ethanolamine-phosphate cytidyltransferase OS=Homo sapiens OX=9606 GN=PCYT2 PE=1 SV=1                                 | -0,078395603 | 0,695604 |
| P10155 | 60 kDa SS-A/Ro ribonucleoprotein OS=Homo sapiens OX=9606 GN=RO60 PE=1 SV=2                                           | 0,073328697  | 0,69445  |
| Q8ND56 | Protein LSM14 homolog A OS=Homo sapiens OX=9606 GN=LSM14A PE=1 SV=3                                                  | -0,143474099 | 0,69425  |
| Q969E4 | Transcription elongation factor A protein-like 3 OS=Homo sapiens OX=9606 GN=TCEAL3 PE=1 SV=1                         | -0,200490335 | 0,693861 |
| Q9POV3 | SH3 domain-binding protein 4 OS=Homo sapiens OX=9606 GN=SH3BP4 PE=1 SV=1                                             | 0,200256625  | 0,692974 |
| Q9UNM6 | 26S proteasome non-ATPase regulatory subunit 13 OS=Homo sapiens OX=9606 GN=PSMD13 PE=1 SV=2                          | -0,06123457  | 0,692956 |
| P62875 | DNA-directed RNA polymerases I, II, and III subunit RPABC5 OS=Homo sapiens OX=9606 GN=POLR2L PE=1 SV=1               | 0,200129693  | 0,692492 |
| Q5RI15 | Cytochrome c oxidase assembly protein COX20, mitochondrial OS=Homo sapiens OX=9606 GN=COX20 PE=1 SV=2                | 0,199731243  | 0,69098  |
| P35250 | Replication factor C subunit 2 OS=Homo sapiens OX=9606 GN=RFC2 PE=1 SV=3                                             | -0,087663147 | 0,690753 |
| Q5Y116 | Polynucleotide 5'-hydroxyl-kinase NOL9 OS=Homo sapiens OX=9606 GN=NOL9 PE=1 SV=1                                     | -0,14283043  | 0,690696 |
| Q8TA86 | Retinitis pigmentosa 9 protein OS=Homo sapiens OX=9606 GN=RP9 PE=1 SV=2                                              | 0,286070542  | 0,690689 |
| Q9Y657 | Spindlin-1 OS=Homo sapiens OX=9606 GN=SPIN1 PE=1 SV=3                                                                | 0,14257341   | 0,689278 |
| Q8TBC4 | NEDD8-activating enzyme E1 catalytic subunit OS=Homo sapiens OX=9606 GN=UBA3 PE=1 SV=2                               | -0,087478907 | 0,689059 |
| P38919 | Eukaryotic initiation factor 4A-III OS=Homo sapiens OX=9606 GN=EIF4A3 PE=1 SV=4                                      | -0,070670836 | 0,688629 |
| Q13485 | Mothers against decapentaplegic homolog 4 OS=Homo sapiens OX=9606 GN=SMAD4 PE=1 SV=1                                 | -0,142374056 | 0,688178 |
| P34949 | Mannose-6-phosphate isomerase OS=Homo sapiens OX=9606 GN=MPI PE=1 SV=2                                               | -0,163421599 | 0,688022 |
| Q9Y6Y0 | Influenza virus NS1A-binding protein OS=Homo sapiens OX=9606 GN=IVNS1ABP PE=1 SV=3                                   | 0,127866918  | 0,687848 |
| Q8IVU3 | Probable E3 ubiquitin-protein ligase HERC6 OS=Homo sapiens OX=9606 GN=HERC6 PE=1 SV=2                                | -0,103698195 | 0,687683 |
| Q9Y6A9 | Signal peptidase complex subunit 1 OS=Homo sapiens OX=9606 GN=SPCS1 PE=1 SV=4                                        | 0,198853264  | 0,687648 |
| Q8NFZ8 | Cell adhesion molecule 4 OS=Homo sapiens OX=9606 GN=CADM4 PE=1 SV=1                                                  | -0,117090598 | 0,687538 |
| P0CG30 | Glutathione S-transferase theta-2B OS=Homo sapiens OX=9606 GN=GSTT2B PE=1 SV=1                                       | -0,284754013 | 0,687515 |
| O95602 | DNA-directed RNA polymerase I subunit RPA1 OS=Homo sapiens OX=9606 GN=POLR1A PE=1 SV=2                               | -0,087221955 | 0,686699 |
| Q8NHV4 | Protein NEDD1 OS=Homo sapiens OX=9606 GN=NEDD1 PE=1 SV=1                                                             | 0,127618503  | 0,686313 |
| Q9UQ53 | Alpha-1,3-mannosyl-glycoprotein 4-beta-N-acetylglucosaminyltransferase B OS=Homo sapiens OX=9606 GN=MGAT4B PE=1 SV=1 | -0,198458641 | 0,686151 |
| O75934 | Pre-mRNA-splicing factor SPF27 OS=Homo sapiens OX=9606 GN=BCAS2 PE=1 SV=1                                            | 0,116862354  | 0,685991 |
| Q13185 | Chromobox protein homolog 3 OS=Homo sapiens OX=9606 GN=CBX3 PE=1 SV=4                                                | -0,108475307 | 0,685853 |
| P63000 | Ras-related C3 botulinum toxin substrate 1 OS=Homo sapiens OX=9606 GN=RAC1 PE=1 SV=1                                 | 0,141883211  | 0,685472 |
| P51809 | Vesicle-associated membrane protein 7 OS=Homo sapiens OX=9606 GN=VAMP7 PE=1 SV=3                                     | 0,091196093  | 0,685249 |
| P07947 | Tyrosine-protein kinase Yes OS=Homo sapiens OX=9606 GN=YES1 PE=1 SV=3                                                | -0,127305429 | 0,684379 |
| Q9NQC7 | Ubiquitin carboxyl-terminal hydrolase CYLD OS=Homo sapiens OX=9606 GN=CYLD PE=1 SV=1                                 | 0,28329752   | 0,684    |
| O00193 | Small acidic protein OS=Homo sapiens OX=9606 GN=SMAP PE=1 SV=1                                                       | 0,162560848  | 0,683394 |
| O43676 | NADH dehydrogenase [ubiquinone] 1 beta subcomplex subunit 3 OS=Homo sapiens OX=9606 GN=NDUFB3 PE=1 SV=3              | -0,162436594 | 0,683351 |
| P45984 | Mitogen-activated protein kinase 9 OS=Homo sapiens OX=9606 GN=MAPK9 PE=1 SV=2                                        | 0,141118678  | 0,683126 |
| P11802 | Cyclin-dependent kinase 4 OS=Homo sapiens OX=9606 GN=CDK4 PE=1 SV=2                                                  | -0,161969055 | 0,681136 |
| Q9H857 | 5'-nucleotidase domain-containing protein 2 OS=Homo sapiens OX=9606 GN=NT5DC2 PE=1 SV=1                              | -0,281990493 | 0,680844 |
| Q9Y2W2 | WW domain-binding protein 11 OS=Homo sapiens OX=9606 GN=WBP11 PE=1 SV=1                                              | 0,090690512  | 0,680828 |
| Q8TEM1 | Nuclear pore membrane glycoprotein 210 OS=Homo sapiens OX=9606 GN=NUP210 PE=1 SV=3                                   | 0,126701564  | 0,680651 |
| P61024 | Cyclin-dependent kinases regulatory subunit 1 OS=Homo sapiens OX=9606 GN=CKS1B PE=1 SV=1                             | -0,161801082 | 0,68034  |

|        |                                                                                                                  |              |          |
|--------|------------------------------------------------------------------------------------------------------------------|--------------|----------|
| Q6P109 | Methyltransferase-like protein 2B OS=Homo sapiens OX=9606 GN=METTL2B PE=1 SV=3                                   | 0,281496059  | 0,679649 |
| Q5JPI3 | Uncharacterized protein C3orf38 OS=Homo sapiens OX=9606 GN=C3orf38 PE=1 SV=1                                     | 0,196731367  | 0,679603 |
| Q9Y5A9 | YTH domain-containing family protein 2 OS=Homo sapiens OX=9606 GN=YTHDF2 PE=1 SV=2                               | -0,107608292 | 0,67951  |
| Q12904 | Aminoacyl tRNA synthase complex-interacting multifunctional protein 1 OS=Homo sapiens OX=9606 GN=AIMP1 PE=1 SV=5 | 0,08643222   | 0,679456 |
| Q9BRK5 | 45 kDa calcium-binding protein OS=Homo sapiens OX=9606 GN=SDF4 PE=1 SV=1                                         | -0,095233372 | 0,679033 |
| O15439 | Multidrug resistance-associated protein 4 OS=Homo sapiens OX=9606 GN=ABCC4 PE=1 SV=3                             | -0,107527831 | 0,678922 |
| Q14738 | Serine/threonine-protein phosphatase 2A 56 kDa regulatory subunit delta isoform OS=Homo sapiens OX=9606 GN=PPP2F | -0,074211693 | 0,678746 |
| Q14678 | KN motif and ankyrin repeat domain-containing protein 1 OS=Homo sapiens OX=9606 GN=KANK1 PE=1 SV=3               | 0,161135134  | 0,677187 |
| P02461 | Collagen alpha-1(III) chain OS=Homo sapiens OX=9606 GN=COL3A1 PE=1 SV=4                                          | -0,055452995 | 0,676811 |
| P49327 | Fatty acid synthase OS=Homo sapiens OX=9606 GN=FASN PE=1 SV=3                                                    | -0,026409971 | 0,675948 |
| O15305 | Phosphomannomutase 2 OS=Homo sapiens OX=9606 GN=PMM2 PE=1 SV=1                                                   | -0,106962128 | 0,674792 |
| O94817 | Ubiquitin-like protein ATG12 OS=Homo sapiens OX=9606 GN=ATG12 PE=1 SV=1                                          | 0,279474006  | 0,674761 |
| Q9Y3D9 | 28S ribosomal protein S23, mitochondrial OS=Homo sapiens OX=9606 GN=MRPS23 PE=1 SV=2                             | -0,195283859 | 0,674119 |
| Q96QK1 | Vacuolar protein sorting-associated protein 35 OS=Homo sapiens OX=9606 GN=VPS35 PE=1 SV=2                        | -0,04667016  | 0,674101 |
| Q9H2U2 | Inorganic pyrophosphatase 2, mitochondrial OS=Homo sapiens OX=9606 GN=PPA2 PE=1 SV=2                             | -0,125624126 | 0,67401  |
| Q9H9A7 | RecQ-mediated genome instability protein 1 OS=Homo sapiens OX=9606 GN=RMI1 PE=1 SV=3                             | -0,160431697 | 0,673859 |
| Q99598 | Translin-associated protein X OS=Homo sapiens OX=9606 GN=TSNAX PE=1 SV=1                                         | -0,106829391 | 0,673823 |
| Q96D46 | 60S ribosomal export protein NMD3 OS=Homo sapiens OX=9606 GN=NMD3 PE=1 SV=1                                      | -0,100102638 | 0,673402 |
| Q8N3R9 | MAGUK p55 subfamily member 5 OS=Homo sapiens OX=9606 GN=MPP5 PE=1 SV=3                                           | 0,139647675  | 0,673171 |
| Q9UGP8 | Translocation protein SEC63 homolog OS=Homo sapiens OX=9606 GN=SEC63 PE=1 SV=2                                   | 0,089721484  | 0,672372 |
| Q7L2J0 | 75K snRNA methylphosphate capping enzyme OS=Homo sapiens OX=9606 GN=MEPCE PE=1 SV=1                              | -0,194803364 | 0,672299 |
| Q9N256 | Formin-2 OS=Homo sapiens OX=9606 GN=FMN2 PE=1 SV=4                                                               | 0,278433056  | 0,672242 |
| Q9UMX1 | Suppressor of fused homolog OS=Homo sapiens OX=9606 GN=SUFU PE=1 SV=2                                            | -0,194784594 | 0,672228 |
| Q9UHB4 | NADPH-dependent diflavin oxidoreductase 1 OS=Homo sapiens OX=9606 GN=NDOR1 PE=1 SV=1                             | -0,139475387 | 0,672224 |
| Q9NRK6 | ATP-binding cassette sub-family B member 10, mitochondrial OS=Homo sapiens OX=9606 GN=ABCB10 PE=1 SV=2           | -0,160039573 | 0,672005 |
| O75694 | Nuclear pore complex protein Nup155 OS=Homo sapiens OX=9606 GN=NUP155 PE=1 SV=1                                  | 0,050662914  | 0,671757 |
| Q9P270 | SLAIN motif-containing protein 2 OS=Homo sapiens OX=9606 GN=SLAIN2 PE=1 SV=2                                     | 0,125252557  | 0,671723 |
| O94766 | Galactosylgalactosylxylosylprotein 3-beta-glucuronosyltransferase 3 OS=Homo sapiens OX=9606 GN=B3GAT3 PE=1 SV=2  | 0,278135253  | 0,671521 |
| Q8IUC4 | Rhopiliin-2 OS=Homo sapiens OX=9606 GN=RHPN2 PE=1 SV=1                                                           | 0,29707488   | 0,671385 |
| Q9N2I8 | Linin-like growth factor 2 mRNA-binding protein 1 OS=Homo sapiens OX=9606 GN=IGF2BP1 PE=1 SV=2                   | 0,076039016  | 0,671228 |
| O43314 | Inositol hexakisphosphate and diphosphoinositol-pentakisphosphate kinase 2 OS=Homo sapiens OX=9606 GN=PIPK2 PI   | -0,139196454 | 0,670692 |
| Q92599 | Septin-8 OS=Homo sapiens OX=9606 GN=SEPTIN8 PE=1 SV=4                                                            | -0,081919671 | 0,670625 |
| P30622 | CAP-Gly domain-containing linker protein 1 OS=Homo sapiens OX=9606 GN=CLIP1 PE=1 SV=2                            | 0,049092559  | 0,67058  |
| Q632Y3 | KN motif and ankyrin repeat domain-containing protein 2 OS=Homo sapiens OX=9606 GN=KANK2 PE=1 SV=1               | -0,075949434 | 0,670306 |
| P08651 | Nuclear factor 1 C-type OS=Homo sapiens OX=9606 GN=NFIC PE=1 SV=2                                                | -0,114528669 | 0,670215 |
| P61353 | 60S ribosomal protein L27 OS=Homo sapiens OX=9606 GN=RPL27 PE=1 SV=2                                             | -0,139030524 | 0,669782 |
| Q92572 | AP-3 complex subunit sigma-1 OS=Homo sapiens OX=9606 GN=AP3S1 PE=1 SV=1                                          | -0,106262421 | 0,669659 |
| Q14919 | Dr1-associated corepressor OS=Homo sapiens OX=9606 GN=DRAP1 PE=1 SV=3                                            | -0,114426891 | 0,669529 |
| Q8NHQ9 | ATP-dependent RNA helicase DDX55 OS=Homo sapiens OX=9606 GN=DDX55 PE=1 SV=3                                      | 0,27718561   | 0,669222 |
| Q9NQT5 | Exosome complex component RRP40 OS=Homo sapiens OX=9606 GN=EXOSC3 PE=1 SV=3                                      | -0,124761743 | 0,668704 |
| Q9Y2Q3 | Glutathione S-transferase kappa 1 OS=Homo sapiens OX=9606 GN=GSTK1 PE=1 SV=3                                     | -0,106125613 | 0,668694 |
| Q9Y3D3 | 28S ribosomal protein S16, mitochondrial OS=Homo sapiens OX=9606 GN=MRPS16 PE=1 SV=1                             | -0,159243615 | 0,668244 |
| Q68D91 | Metallo-beta-lactamase domain-containing protein 2 OS=Homo sapiens OX=9606 GN=MBLAC2 PE=1 SV=3                   | -0,27673359  | 0,668128 |
| Q9BWE0 | Replication initiator 1 OS=Homo sapiens OX=9606 GN=REPIN1 PE=1 SV=1                                              | 0,276648478  | 0,667921 |
| P53367 | Arfaptin-1 OS=Homo sapiens OX=9606 GN=ARFIP1 PE=1 SV=2                                                           | 0,093744275  | 0,666721 |
| Q99685 | Monoglyceride lipase OS=Homo sapiens OX=9606 GN=MGLL PE=1 SV=2                                                   | 0,099216117  | 0,666498 |
| P60891 | Ribose-phosphate pyrophosphokinase 1 OS=Homo sapiens OX=9606 GN=PRPS1 PE=1 SV=2                                  | 0,158779768  | 0,666053 |
| Q965Y0 | Integrator complex subunit 14 OS=Homo sapiens OX=9606 GN=INTS14 PE=1 SV=2                                        | -0,275450097 | 0,665018 |
| Q9H9T3 | Elongator complex protein 3 OS=Homo sapiens OX=9606 GN=ELP3 PE=1 SV=2                                            | -0,098953296 | 0,664454 |
| Q96J84 | Kin of IRRE-like protein 1 OS=Homo sapiens OX=9606 GN=KIRREL1 PE=1 SV=2                                          | 0,275196277  | 0,664402 |
| Q8IY81 | pre-rRNA 2'-O-ribose RNA methyltransferase FTSJ3 OS=Homo sapiens OX=9606 GN=FTSJ3 PE=1 SV=2                      | 0,113652104  | 0,66431  |
| Q99653 | Calcineurin B homologous protein 1 OS=Homo sapiens OX=9606 GN=CHP1 PE=1 SV=3                                     | 0,274887743  | 0,663654 |
| Q969T3 | Sorting nexin-21 OS=Homo sapiens OX=9606 GN=SNX21 PE=2 SV=1                                                      | 0,274755224  | 0,663333 |
| Q14232 | Translation initiation factor eIF-2B subunit alpha OS=Homo sapiens OX=9606 GN=EIF2B1 PE=1 SV=1                   | -0,137764076 | 0,662838 |
| Q6Y7W6 | GRB10-interacting GYF protein 2 OS=Homo sapiens OX=9606 GN=GIGYF2 PE=1 SV=1                                      | 0,063115813  | 0,662369 |
| Q9B7X1 | Nucleoporin NDC1 OS=Homo sapiens OX=9606 GN=NDC1 PE=1 SV=2                                                       | -0,274317982 | 0,662273 |
| P08865 | 40S ribosomal protein SA OS=Homo sapiens OX=9606 GN=RPSA PE=1 SV=4                                               | -0,068338572 | 0,662133 |
| Q15417 | Calponin-3 OS=Homo sapiens OX=9606 GN=CNN3 PE=1 SV=1                                                             | 0,088517565  | 0,661902 |
| P52888 | Thimet oligopeptidase OS=Homo sapiens OX=9606 GN=THOP1 PE=1 SV=2                                                 | -0,05884885  | 0,661429 |
| P25325 | 3-mercaptopyruvate sulfurtransferase OS=Homo sapiens OX=9606 GN=MPST PE=1 SV=3                                   | -0,113053471 | 0,660283 |
| Q9BZE9 | Tether containing UBX domain for GLUT4 OS=Homo sapiens OX=9606 GN=ASPSCR1 PE=1 SV=1                              | 0,104843406  | 0,659371 |
| Q96E11 | Ribosome-recycling factor, mitochondrial OS=Homo sapiens OX=9606 GN=MRRF PE=1 SV=1                               | 0,137126204  | 0,659345 |
| P17706 | Tyrosine-protein phosphatase non-receptor type 2 OS=Homo sapiens OX=9606 GN=PTNP2 PE=1 SV=2                      | -0,272712284 | 0,658377 |
| P54802 | Alpha-N-acetylglucosaminidase OS=Homo sapiens OX=9606 GN=NAGLU PE=1 SV=2                                         | 0,139515161  | 0,657823 |
| Q9Y421 | Protein FAM32A OS=Homo sapiens OX=9606 GN=FAM32A PE=1 SV=2                                                       | -0,272393216 | 0,657603 |
| O00506 | Serine/threonine-protein kinase 25 OS=Homo sapiens OX=9606 GN=STK25 PE=1 SV=1                                    | 0,12280797   | 0,656715 |
| P35269 | General transcription factor IIF subunit 1 OS=Homo sapiens OX=9606 GN=GTF2F1 PE=1 SV=2                           | 0,077367606  | 0,656624 |
| P16152 | Carbonyl reductase [NADPH] 1 OS=Homo sapiens OX=9606 GN=CBR1 PE=1 SV=3                                           | 0,083877321  | 0,65615  |
| Q9Y3A4 | Ribosomal RNA-processing protein 7 homolog A OS=Homo sapiens OX=9606 GN=RRP7A PE=1 SV=2                          | -0,190532386 | 0,656146 |
| P47756 | F-actin-capping protein subunit beta OS=Homo sapiens OX=9606 GN=CAPZB PE=1 SV=4                                  | -0,074485154 | 0,655272 |
| Q9H9C1 | Spermatogenesis-defective protein 39 homolog OS=Homo sapiens OX=9606 GN=VIPAS39 PE=1 SV=1                        | 0,297162264  | 0,654275 |
| P62847 | 40S ribosomal protein S24 OS=Homo sapiens OX=9606 GN=RPS24 PE=1 SV=1                                             | -0,156246189 | 0,654109 |
| O15498 | Synaptobrevin homolog YKT6 OS=Homo sapiens OX=9606 GN=YKT6 PE=1 SV=1                                             | 0,104096321  | 0,653953 |
| Q9Y6X9 | ATPase MORC2 OS=Homo sapiens OX=9606 GN=MORC2 PE=1 SV=2                                                          | -0,270836347 | 0,653822 |
| Q865Q0 | Pleckstrin homology-like domain family B member 2 OS=Homo sapiens OX=9606 GN=PHLDB2 PE=1 SV=2                    | 0,062414632  | 0,653787 |
| P05165 | Propionyl-CoA carboxylase alpha chain, mitochondrial OS=Homo sapiens OX=9606 GN=PCCA PE=1 SV=4                   | 0,270764879  | 0,653648 |
| Q15392 | Delta(24)-sterol reductase OS=Homo sapiens OX=9606 GN=DHCR24 PE=1 SV=2                                           | -0,122293051 | 0,653562 |
| Q14624 | Inter-alpha-trypsin inhibitor heavy chain H4 OS=Homo sapiens OX=9606 GN=ITIH4 PE=1 SV=4                          | 0,18984296   | 0,653541 |
| Q16666 | Gamma-interferon-inducible protein 16 OS=Homo sapiens OX=9606 GN=IFI16 PE=1 SV=3                                 | -0,060909108 | 0,653465 |
| Q8WUA4 | General transcription factor 3C polypeptide 2 OS=Homo sapiens OX=9606 GN=GTF3C2 PE=1 SV=2                        | -0,156083474 | 0,653343 |
| Q53759 | HCLS1-binding protein 3 OS=Homo sapiens OX=9606 GN=HS1BP3 PE=1 SV=1                                              | -0,156053544 | 0,653202 |
| Q96ED9 | Protein Hook homolog 2 OS=Homo sapiens OX=9606 GN=HOOK2 PE=1 SV=3                                                | 0,270560849  | 0,653153 |
| L0R819 | ASNSD1 upstream open reading frame protein OS=Homo sapiens OX=9606 GN=ASDURF PE=1 SV=1                           | -0,251908037 | 0,652799 |
| Q13547 | Histone deacetylase 1 OS=Homo sapiens OX=9606 GN=HDAC1 PE=1 SV=1                                                 | -0,087303876 | 0,651385 |
| O75688 | Protein phosphatase 1B OS=Homo sapiens OX=9606 GN=PPM1B PE=1 SV=1                                                | -0,103680437 | 0,650974 |
| O00399 | Dynactin subunit 6 OS=Homo sapiens OX=9606 GN=DCTN6 PE=1 SV=1                                                    | 0,188976984  | 0,650272 |
| Q96IU4 | Protein ABHD14B OS=Homo sapiens OX=9606 GN=ABHD14B PE=1 SV=1                                                     | -0,111514865 | 0,649958 |
| Q9Y613 | FH1/FH2 domain-containing protein 1 OS=Homo sapiens OX=9606 GN=FHOD1 PE=1 SV=3                                   | -0,188811018 | 0,649645 |
| Q7Z3U7 | Protein MON2 homolog OS=Homo sapiens OX=9606 GN=MON2 PE=1 SV=3                                                   | -0,091657264 | 0,649553 |
| Q96GQ7 | Probable ATP-dependent RNA helicase DDX27 OS=Homo sapiens OX=9606 GN=DDX27 PE=1 SV=2                             | -0,103475221 | 0,649455 |
| P28702 | Retinoic acid receptor RXR-beta OS=Homo sapiens OX=9606 GN=RXRB PE=1 SV=2                                        | 0,155170543  | 0,649048 |

|        |                                                                                                                |              |          |
|--------|----------------------------------------------------------------------------------------------------------------|--------------|----------|
| Q9P2E3 | NFX1-type zinc finger-containing protein 1 OS=Homo sapiens OX=9606 GN=ZNF1 PE=2 SV=2                           | -0,103407055 | 0,648962 |
| Q9Y2X9 | Zinc finger protein 281 OS=Homo sapiens OX=9606 GN=ZNF281 PE=1 SV=1                                            | 0,432512977  | 0,647455 |
| Q12979 | Active breakpoint cluster region-related protein OS=Homo sapiens OX=9606 GN=ABR PE=1 SV=2                      | -0,069405026 | 0,64731  |
| Q7Z7L7 | Protein zer-1 homolog OS=Homo sapiens OX=9606 GN=ZER1 PE=1 SV=1                                                | 0,183761514  | 0,647204 |
| Q8WXF7 | Atlastin-1 OS=Homo sapiens OX=9606 GN=ATL1 PE=1 SV=1                                                           | -0,134873838 | 0,64704  |
| P61088 | Ubiquitin-conjugating enzyme E2 N OS=Homo sapiens OX=9606 GN=UBE2N PE=1 SV=1                                   | -0,096550283 | 0,645833 |
| O75937 | DnaI homolog subfamily C member 8 OS=Homo sapiens OX=9606 GN=DNAI8C PE=1 SV=2                                  | 0,091118278  | 0,645136 |
| P02042 | Hemoglobin subunit delta OS=Homo sapiens OX=9606 GN=HBD PE=1 SV=2                                              | 0,267246405  | 0,645094 |
| Q9UB59 | SUN domain-containing ossification factor OS=Homo sapiens OX=9606 GN=SUCO PE=1 SV=1                            | 0,267231537  | 0,645057 |
| P12074 | Cytochrome c oxidase subunit 6A1, mitochondrial OS=Homo sapiens OX=9606 GN=COX6A1 PE=1 SV=4                    | -0,210988114 | 0,644743 |
| Q9Y5E1 | Protocadherin beta-9 OS=Homo sapiens OX=9606 GN=PCDHB9 PE=2 SV=2                                               | -0,644351785 | 0,644421 |
| P35268 | 60S ribosomal protein L22 OS=Homo sapiens OX=9606 GN=RPL22 PE=1 SV=2                                           | -0,15414634  | 0,644235 |
| P13798 | Acylamino-acid-releasing enzyme OS=Homo sapiens OX=9606 GN=APEH PE=1 SV=4                                      | 0,070968759  | 0,644221 |
| O94900 | Thymocyte selection-associated high mobility group box protein TOX OS=Homo sapiens OX=9606 GN=TOX PE=2 SV=3    | -0,13434839  | 0,644176 |
| P00846 | ATP synthase subunit a OS=Homo sapiens OX=9606 GN=MT-ATP6 PE=1 SV=1                                            | -0,266541315 | 0,643377 |
| Q9NP84 | Tumor necrosis factor receptor superfamily member 12A OS=Homo sapiens OX=9606 GN=TNFRSF12A PE=1 SV=1           | 0,589496294  | 0,643038 |
| Q9UHW9 | Solute carrier family 12 member 6 OS=Homo sapiens OX=9606 GN=SLC12A6 PE=1 SV=2                                 | 0,2666181736 | 0,642502 |
| P56377 | AP-1 complex subunit sigma-2 OS=Homo sapiens OX=9606 GN=AP1S2 PE=1 SV=1                                        | 0,2666119826 | 0,642351 |
| P13056 | Adenylosuccinate lyase OS=Homo sapiens OX=9606 GN=ADSL PE=1 SV=2                                               | -0,075896403 | 0,642138 |
| O43290 | U4/U6.U5 tri-snRNP-associated protein 1 OS=Homo sapiens OX=9606 GN=SART1 PE=1 SV=1                             | -0,068549415 | 0,641909 |
| Q9UI10 | Translation initiation factor eIF-2B subunit delta OS=Homo sapiens OX=9606 GN=EIF2B4 PE=1 SV=2                 | -0,120333205 | 0,641591 |
| Q9H8H0 | Nucleolar protein 11 OS=Homo sapiens OX=9606 GN=NOL11 PE=1 SV=1                                                | -0,186290089 | 0,641478 |
| Q8IYT4 | Katanin p60 ATPase-containing subunit A-like 2 OS=Homo sapiens OX=9606 GN=KATNAL2 PE=1 SV=3                    | -0,172368022 | 0,641416 |
| Q01813 | ATP-dependent 6-phosphofructokinase, platelet type OS=Homo sapiens OX=9606 GN=PFKP PE=1 SV=2                   | -0,051962223 | 0,640572 |
| Q9Y4B5 | Microtubule cross-linking factor 1 OS=Homo sapiens OX=9606 GN=MTCL1 PE=1 SV=5                                  | -0,136514218 | 0,640481 |
| Q9NX08 | COMM domain-containing protein 8 OS=Homo sapiens OX=9606 GN=COMM8 PE=1 SV=1                                    | -0,133592424 | 0,640058 |
| Q06787 | Synaptic functional regulator FMR1 OS=Homo sapiens OX=9606 GN=FMR1 PE=1 SV=1                                   | -0,095782959 | 0,639912 |
| Q9H1A4 | Anaphase-promoting complex subunit 1 OS=Homo sapiens OX=9606 GN=ANAPC1 PE=1 SV=1                               | -0,095765975 | 0,639781 |
| Q9Y343 | Sorting nexin-24 OS=Homo sapiens OX=9606 GN=SNX24 PE=1 SV=1                                                    | 0,436251565  | 0,638543 |
| P31949 | Protein S100-A11 OS=Homo sapiens OX=9606 GN=S100A11 PE=1 SV=2                                                  | -0,109765002 | 0,638257 |
| Q12851 | Mitogen-activated protein kinase kinase 2 OS=Homo sapiens OX=9606 GN=MAP4K2 PE=1 SV=2                          | -0,264116317 | 0,637471 |
| P41226 | Ubiquitin-like modifier-activating enzyme 7 OS=Homo sapiens OX=9606 GN=UBA7 PE=1 SV=2                          | -0,152641158 | 0,637171 |
| Q9P2B4 | CTTNBP2 N-terminal-like protein OS=Homo sapiens OX=9606 GN=CTTNBP2NL PE=1 SV=2                                 | -0,109587858 | 0,637074 |
| P54764 | Ephrin type-A receptor 4 OS=Homo sapiens OX=9606 GN=EPHA4 PE=1 SV=1                                            | 0,263130827  | 0,635069 |
| Q9Y263 | Phospholipase A-2-activating protein OS=Homo sapiens OX=9606 GN=PLAA PE=1 SV=2                                 | -0,056812842 | 0,634817 |
| Q8NEZ4 | Histone-lysine N-methyltransferase 2C OS=Homo sapiens OX=9606 GN=KMT2C PE=1 SV=3                               | -0,53568727  | 0,63459  |
| Q6UXH1 | Cysteine-rich with EGF-like domain protein 2 OS=Homo sapiens OX=9606 GN=CRELD2 PE=1 SV=1                       | 0,26288761   | 0,634476 |
| O60828 | Polyglutamine-binding protein 1 OS=Homo sapiens OX=9606 GN=PQB1 PE=1 SV=1                                      | 0,152009641  | 0,634211 |
| P20020 | Plasma membrane calcium-transporting ATPase 1 OS=Homo sapiens OX=9606 GN=ATP2B1 PE=1 SV=4                      | 0,085237852  | 0,633574 |
| Q5H9U9 | Probable ATP-dependent RNA helicase DDX60-like OS=Homo sapiens OX=9606 GN=DDX60L PE=2 SV=2                     | -0,262486463 | 0,633498 |
| O75874 | Isocitrate dehydrogenase [NADP] cytoplasmic OS=Homo sapiens OX=9606 GN=IDH1 PE=1 SV=2                          | -0,069937483 | 0,633361 |
| Q7L0Y3 | tRNA methyltransferase 10 homolog C OS=Homo sapiens OX=9606 GN=TRMT10C PE=1 SV=2                               | -0,094925252 | 0,633308 |
| Q15436 | Protein transport protein Sec23A OS=Homo sapiens OX=9606 GN=SEC23A PE=1 SV=2                                   | -0,051450292 | 0,633225 |
| Q8IYB3 | Serine/arginine repetitive matrix protein 1 OS=Homo sapiens OX=9606 GN=SRRM1 PE=1 SV=2                         | 0,094908541  | 0,633179 |
| Q8WXX5 | DnaI homolog subfamily C member 9 OS=Homo sapiens OX=9606 GN=DNAI9C PE=1 SV=1                                  | 0,089607901  | 0,632794 |
| O94830 | Phospholipase DDHD2 OS=Homo sapiens OX=9606 GN=DDHD2 PE=1 SV=2                                                 | -0,089583854 | 0,632598 |
| Q8WZA0 | Protein LZIC OS=Homo sapiens OX=9606 GN=LZIC PE=1 SV=1                                                         | 0,184144056  | 0,632051 |
| Q9C0C2 | 182 kDa tankyrase-1-binding protein OS=Homo sapiens OX=9606 GN=TNKS1BP1 PE=1 SV=4                              | -0,044143478 | 0,631621 |
| O00410 | Importin-5 OS=Homo sapiens OX=9606 GN=IPO5 PE=1 SV=4                                                           | -0,042005648 | 0,631576 |
| Q43633 | Charged multivesicular body protein 2a OS=Homo sapiens OX=9606 GN=CHMP2A PE=1 SV=1                             | 0,151340749  | 0,631078 |
| P51784 | Ubiquitin carboxyl-terminal hydrolase 11 OS=Homo sapiens OX=9606 GN=USP11 PE=1 SV=3                            | -0,089389642 | 0,631016 |
| O00213 | Amyloid-beta A4 precursor protein-binding family B member 1 OS=Homo sapiens OX=9606 GN=APBB1 PE=1 SV=2         | -0,183574426 | 0,629906 |
| P28482 | Mitogen-activated protein kinase 1 OS=Homo sapiens OX=9606 GN=MAPK1 PE=1 SV=3                                  | -0,063615678 | 0,629385 |
| Q8IWA0 | WD repeat-containing protein 75 OS=Homo sapiens OX=9606 GN=WDR75 PE=1 SV=1                                     | -0,150860155 | 0,628828 |
| O43149 | Zinc finger ZZ-type and EF-hand domain-containing protein 1 OS=Homo sapiens OX=9606 GN=ZFEF1 PE=1 SV=6         | 0,094266688  | 0,628247 |
| Q9H3Y8 | Pancreatic progenitor cell differentiation and proliferation factor OS=Homo sapiens OX=9606 GN=PPDPF PE=1 SV=1 | 0,26022591   | 0,627982 |
| Q5JWF2 | Guanine nucleotide-binding protein G(s) subunit alpha isoforms XLas OS=Homo sapiens OX=9606 GN=GNAS PE=1 SV=2  | 0,074442911  | 0,627901 |
| P62304 | Small nuclear ribonucleoprotein E OS=Homo sapiens OX=9606 GN=SNRPE PE=1 SV=1                                   | 0,183039082  | 0,627891 |
| P26374 | Rab protein geranyltransferase component A 2 OS=Homo sapiens OX=9606 GN=CHML PE=1 SV=2                         | 0,7272119733 | 0,627151 |
| Q8N1G4 | Leucine-rich repeat-containing protein 47 OS=Homo sapiens OX=9606 GN=LRR47 PE=1 SV=1                           | -0,06172846  | 0,626776 |
| O95155 | Ubiquitin conjugation factor E4 B OS=Homo sapiens OX=9606 GN=UBE4B PE=1 SV=1                                   | -0,088864338 | 0,626739 |
| Q9NZJ7 | Mitochondrial carrier homolog 1 OS=Homo sapiens OX=9606 GN=MTCH1 PE=1 SV=1                                     | -0,18245461  | 0,625693 |
| Q9NZB2 | Constitutive coactivator of PPAR-gamma-like protein 1 OS=Homo sapiens OX=9606 GN=FAM120A PE=1 SV=2             | -0,050922229 | 0,625668 |
| Q9UHV9 | Prefoldin subunit 2 OS=Homo sapiens OX=9606 GN=PFN2 PE=1 SV=1                                                  | -0,117688228 | 0,625505 |
| Q9GZN8 | UPF0687 protein C20orf27 OS=Homo sapiens OX=9606 GN=C20orf27 PE=1 SV=3                                         | 0,130777711  | 0,624772 |
| P10398 | Serine/threonine-protein kinase A-Raf OS=Homo sapiens OX=9606 GN=ARAF PE=1 SV=2                                | -0,182183097 | 0,624671 |
| Q99747 | Gamma-soluble NSF attachment protein OS=Homo sapiens OX=9606 GN=NAPG PE=1 SV=1                                 | 0,084198403  | 0,624655 |
| P28715 | DNA repair protein complementing XP-G cells OS=Homo sapiens OX=9606 GN=ERCC5 PE=1 SV=3                         | -0,181988917 | 0,623941 |
| O43491 | Band 4.1-like protein 2 OS=Homo sapiens OX=9606 GN=EPB41L2 PE=1 SV=1                                           | -0,052625773 | 0,623014 |
| Q9NVM9 | Integrator complex subunit 13 OS=Homo sapiens OX=9606 GN=INTS13 PE=1 SV=2                                      | -0,181643812 | 0,622643 |
| Q92974 | Rho guanine nucleotide exchange factor 2 OS=Homo sapiens OX=9606 GN=ARHGEF2 PE=1 SV=4                          | -0,041986486 | 0,622522 |
| O14980 | Exportin-1 OS=Homo sapiens OX=9606 GN=XPO1 PE=1 SV=1                                                           | -0,038040028 | 0,622303 |
| P22694 | cAMP-dependent protein kinase catalytic subunit beta OS=Homo sapiens OX=9606 GN=PRKACB PE=1 SV=2               | 0,306559767  | 0,622271 |
| Q15287 | RNA-binding protein with serine-rich domain 1 OS=Homo sapiens OX=9606 GN=RNPS1 PE=1 SV=1                       | 0,130236324  | 0,621839 |
| P37837 | Transaldolase OS=Homo sapiens OX=9606 GN=TALDO1 PE=1 SV=2                                                      | -0,066644998 | 0,621257 |
| Q68EM7 | Rho GTPase-activating protein 17 OS=Homo sapiens OX=9606 GN=ARHGAP17 PE=1 SV=1                                 | 0,062872753  | 0,620864 |
| Q9BTV4 | Transmembrane protein 43 OS=Homo sapiens OX=9606 GN=TMEM43 PE=1 SV=1                                           | 0,062826219  | 0,620331 |
| Q96B36 | Proline-rich AKT1 substrate 1 OS=Homo sapiens OX=9606 GN=AKT1S1 PE=1 SV=1                                      | 0,129911044  | 0,620078 |
| Q9Y296 | Trafficking protein particle complex subunit 4 OS=Homo sapiens OX=9606 GN=TRAPP4 PE=1 SV=1                     | 0,180621288  | 0,6188   |
| Q3LXA3 | Triokinase/FMN cyclase OS=Homo sapiens OX=9606 GN=TKFC PE=1 SV=2                                               | -0,076381866 | 0,618318 |
| P61619 | Protein transport protein Sec61 subunit alpha isoform 1 OS=Homo sapiens OX=9606 GN=SEC61A1 PE=1 SV=2           | 0,087797304  | 0,618071 |
| Q9Y653 | Adhesion G-protein coupled receptor G1 OS=Homo sapiens OX=9606 GN=ADGRG1 PE=1 SV=2                             | 0,256049289  | 0,617777 |
| Q8IWX5 | Centrosomal protein of 97 kDa OS=Homo sapiens OX=9606 GN=CEP97 PE=1 SV=1                                       | 0,068413801  | 0,617396 |
| O60292 | Signal-induced proliferation-associated 1-like protein 3 OS=Homo sapiens OX=9606 GN=SIPA1L3 PE=1 SV=3          | -0,129323534 | 0,6169   |
| Q8NFG4 | Folliculin OS=Homo sapiens OX=9606 GN=FLCN PE=1 SV=1                                                           | 0,148125418  | 0,616051 |
| O43772 | Mitochondrial carnitine/acylcarnitine carrier protein OS=Homo sapiens OX=9606 GN=SLC25A20 PE=1 SV=1            | -0,255308268 | 0,615964 |
| Q13432 | Protein unc-119 homolog A OS=Homo sapiens OX=9606 GN=UNC119 PE=1 SV=1                                          | 0,179819453  | 0,615788 |
| Q9Y310 | tRNA-splicing ligase RtcB homolog OS=Homo sapiens OX=9606 GN=RTCB PE=1 SV=1                                    | -0,066075926 | 0,615117 |
| O43293 | Death-associated protein kinase 3 OS=Homo sapiens OX=9606 GN=DAPK3 PE=1 SV=1                                   | 0,179637903  | 0,615106 |
| P62942 | Peptidyl-prolyl cis-trans isomerase FKBP1A OS=Homo sapiens OX=9606 GN=FKBP1A PE=1 SV=2                         | 0,128984539  | 0,615068 |
| Q8NBL1 | Protein O-glucosyltransferase 1 OS=Homo sapiens OX=9606 GN=POGLUT1 PE=1 SV=1                                   | 0,128954688  | 0,614907 |

|        |                                                                                                                   |              |          |
|--------|-------------------------------------------------------------------------------------------------------------------|--------------|----------|
| Q12797 | Aspartyl/asparaginyl beta-hydroxylase OS=Homo sapiens OX=9606 GN=ASPH PE=1 SV=3                                   | -0,068166639 | 0,614815 |
| Q9HCU8 | DNA polymerase delta subunit 4 OS=Homo sapiens OX=9606 GN=POLD4 PE=1 SV=1                                         | 0,069181311  | 0,613991 |
| Q95394 | Phosphoacetylglucosamine mutase OS=Homo sapiens OX=9606 GN=PGM3 PE=1 SV=1                                         | -0,065858555 | 0,612775 |
| Q9Y320 | Thioredoxin-related transmembrane protein 2 OS=Homo sapiens OX=9606 GN=TMX2 PE=1 SV=1                             | -0,105928382 | 0,612758 |
| P62879 | Guanine nucleotide-binding protein G(I)/G(S)/G(T) subunit beta-2 OS=Homo sapiens OX=9606 GN=GNB2 PE=1 SV=3        | 0,178917804  | 0,612402 |
| Q9UB88 | Protein CLN8 OS=Homo sapiens OX=9606 GN=CLN8 PE=1 SV=3                                                            | 0,253728371  | 0,612098 |
| Q9UPN9 | E3 ubiquitin-protein ligase TRIM33 OS=Homo sapiens OX=9606 GN=TRIM33 PE=1 SV=3                                    | -0,253472108 | 0,611471 |
| Q13191 | E3 ubiquitin-protein ligase CBL-B OS=Homo sapiens OX=9606 GN=CBLB PE=1 SV=2                                       | 0,178456427  | 0,610671 |
| Q9UK59 | Lariat debranching enzyme OS=Homo sapiens OX=9606 GN=DDR1 PE=1 SV=2                                               | -0,115211128 | 0,610514 |
| Q13625 | Apoptosis-stimulating of p53 protein 2 OS=Homo sapiens OX=9606 GN=TP53BP2 PE=1 SV=2                               | -0,098052602 | 0,610479 |
| P48681 | Nestin OS=Homo sapiens OX=9606 GN=NES PE=1 SV=2                                                                   | -0,032995863 | 0,608237 |
| Q9Y2H6 | Fibronectin type-III domain-containing protein 3A OS=Homo sapiens OX=9606 GN=FNDC3A PE=1 SV=4                     | 0,105119335  | 0,607409 |
| P09622 | Dihydropolypol dehydrogenase, mitochondrial OS=Homo sapiens OX=9606 GN=DLD PE=1 SV=2                              | -0,065342965 | 0,607223 |
| Q86VV6 | Stimulator of interferon genes protein OS=Homo sapiens OX=9606 GN=TMEM173 PE=1 SV=1                               | 0,146124106  | 0,606727 |
| O14672 | Disintegrin and metalloproteinase domain-containing protein 10 OS=Homo sapiens OX=9606 GN=ADAM10 PE=1 SV=1        | 0,097504534  | 0,606568 |
| Q14247 | Src substrate cactin OS=Homo sapiens OX=9606 GN=CTTN PE=1 SV=2                                                    | 0,050349065  | 0,604777 |
| Q13564 | NEDD8-activating enzyme E1 regulatory subunit OS=Homo sapiens OX=9606 GN=NAE1 PE=1 SV=1                           | 0,074897445  | 0,604468 |
| P49419 | Alpha-aminoacidic semialdehyde dehydrogenase OS=Homo sapiens OX=9606 GN=ALDH7A1 PE=1 SV=5                         | 0,0630397    | 0,602895 |
| Q66HR8 | H/ACA ribonucleoprotein complex non-core subunit NAF1 OS=Homo sapiens OX=9606 GN=NAF1 PE=1 SV=2                   | -0,4049962   | 0,602863 |
| Q14194 | Dihydropyrimidinase-related protein 1 OS=Homo sapiens OX=9606 GN=CRMP1 PE=1 SV=1                                  | 0,061268896  | 0,602563 |
| Q6IBW4 | Condensin-2 complex subunit H2 OS=Homo sapiens OX=9606 GN=NCAPH2 PE=1 SV=1                                        | -0,249684841 | 0,602192 |
| Q9NV11 | Cytochrome c oxidase assembly factor 4 homolog, mitochondrial OS=Homo sapiens OX=9606 GN=COA4 PE=1 SV=2           | 0,249644236  | 0,602092 |
| O14981 | TATA-binding protein-associated factor 172 OS=Homo sapiens OX=9606 GN=BTAF1 PE=1 SV=2                             | 0,104237671  | 0,60159  |
| Q9NZD2 | Glycolipid transfer protein OS=Homo sapiens OX=9606 GN=GLTP PE=1 SV=3                                             | 0,249336567  | 0,601338 |
| Q5T258 | Armadillo repeat-containing protein 4 OS=Homo sapiens OX=9606 GN=ARM4 PE=1 SV=1                                   | -0,144842339 | 0,600766 |
| Q15005 | Signal peptidase complex subunit 2 OS=Homo sapiens OX=9606 GN=SPC2 PE=1 SV=3                                      | -0,113535539 | 0,600414 |
| Q9NRM1 | Enamelin OS=Homo sapiens OX=9606 GN=ENAM PE=1 SV=3                                                                | 0,248920933  | 0,600319 |
| O15042 | U2 snRNP-associated SURP motif-containing protein OS=Homo sapiens OX=9606 GN=U2SURP PE=1 SV=2                     | -0,064683362 | 0,600153 |
| Q99614 | Tetratricopeptide repeat protein 1 OS=Homo sapiens OX=9606 GN=TTC1 PE=1 SV=1                                      | -0,074401023 | 0,599852 |
| Q676U5 | Autophagy-related protein 16-1 OS=Homo sapiens OX=9606 GN=ATG16L1 PE=1 SV=2                                       | -0,175402868 | 0,599222 |
| Q13813 | Spectrin alpha chain, non-erythrocytic 1 OS=Homo sapiens OX=9606 GN=SPTAN1 PE=1 SV=3                              | -0,021495466 | 0,598089 |
| O75306 | NADH dehydrogenase [ubiquinone] iron-sulfur protein 2, mitochondrial OS=Homo sapiens OX=9606 GN=NDUFS2 PE=1 SV=1  | 0,090283544  | 0,597832 |
| Q92576 | PHD finger protein 3 OS=Homo sapiens OX=9606 GN=PHF3 PE=1 SV=3                                                    | -0,243172121 | 0,597595 |
| P09038 | Fibroblast growth factor 2 OS=Homo sapiens OX=9606 GN=FGF2 PE=1 SV=3                                              | -0,125732843 | 0,597542 |
| Q95169 | NADH dehydrogenase [ubiquinone] 1 beta subcomplex subunit 8, mitochondrial OS=Homo sapiens OX=9606 GN=NDUFB8      | -0,247513926 | 0,596867 |
| Q8WVT3 | Trafficking protein particle complex subunit 12 OS=Homo sapiens OX=9606 GN=TRAPP12 PE=1 SV=3                      | -0,247347146 | 0,596458 |
| Q965T2 | Protein IWS1 homolog OS=Homo sapiens OX=9606 GN=IWS1 PE=1 SV=2                                                    | 0,112740421  | 0,595632 |
| Q9H0A8 | COMM domain-containing protein 4 OS=Homo sapiens OX=9606 GN=COMM4 PE=1 SV=1                                       | 0,095923724  | 0,595319 |
| Q53H12 | Acylglycerol kinase, mitochondrial OS=Homo sapiens OX=9606 GN=AGK PE=1 SV=2                                       | -0,112597532 | 0,594774 |
| P10619 | Lysosomal protective protein OS=Homo sapiens OX=9606 GN=CTSA PE=1 SV=2                                            | 0,089865006  | 0,594655 |
| Q9NRA8 | Eukaryotic translation initiation factor 4E transporter OS=Homo sapiens OX=9606 GN=EIF4ENIF1 PE=1 SV=2            | -0,246491131 | 0,594357 |
| Q86YR5 | G-protein-signaling modulator 1 OS=Homo sapiens OX=9606 GN=GPSM1 PE=1 SV=2                                        | -0,066086756 | 0,5932   |
| Q9UEY8 | Gamma-adducin OS=Homo sapiens OX=9606 GN=ADD3 PE=1 SV=1                                                           | 0,09550564   | 0,592351 |
| Q9NVC6 | Mediator of RNA polymerase II transcription subunit 17 OS=Homo sapiens OX=9606 GN=MED17 PE=1 SV=2                 | -0,245658154 | 0,592311 |
| Q8WWW9 | Cytoskeleton-associated protein 2 OS=Homo sapiens OX=9606 GN=CKAP2 PE=1 SV=1                                      | 0,142867443  | 0,591601 |
| P63010 | AP-2 complex subunit beta OS=Homo sapiens OX=9606 GN=AP2B1 PE=1 SV=1                                              | -0,039241788 | 0,591525 |
| Q96FQ6 | Protein S100-A16 OS=Homo sapiens OX=9606 GN=S100A16 PE=1 SV=1                                                     | -0,112023986 | 0,591331 |
| Q86522 | Trafficking protein particle complex subunit 6B OS=Homo sapiens OX=9606 GN=TRAPP6B PE=1 SV=1                      | 0,245160008  | 0,591088 |
| Q92540 | Protein SMG7 OS=Homo sapiens OX=9606 GN=SMG7 PE=1 SV=2                                                            | -0,173026068 | 0,590325 |
| P09496 | Clathrin light chain A OS=Homo sapiens OX=9606 GN=CLTA PE=1 SV=1                                                  | -0,095112476 | 0,589564 |
| Q9NXW2 | DnaJ ubiquitin subfamily B member 12 OS=Homo sapiens OX=9606 GN=DNAJB12 PE=1 SV=5                                 | 0,124182717  | 0,58922  |
| Q9NZ09 | Ubiquitin-associated protein 1 OS=Homo sapiens OX=9606 GN=UBAP1 PE=1 SV=1                                         | 0,123887095  | 0,587635 |
| Q8WYP5 | Protein ELYS OS=Homo sapiens OX=9606 GN=AHCTF1 PE=1 SV=3                                                          | 0,056923323  | 0,58754  |
| Q14680 | Maternal embryonic leucine zipper kinase OS=Homo sapiens OX=9606 GN=MELK PE=1 SV=3                                | -0,300710925 | 0,586746 |
| Q96EY4 | Translation machinery-associated protein 16 OS=Homo sapiens OX=9606 GN=TMA16 PE=1 SV=2                            | -0,167809443 | 0,586669 |
| P36969 | Phospholipid hydroperoxide glutathione peroxidase OS=Homo sapiens OX=9606 GN=GPX4 PE=1 SV=3                       | -0,141651276 | 0,585967 |
| Q9UI8C | Leucine carboxyl methyltransferase 1 OS=Homo sapiens OX=9606 GN=LCMT1 PE=1 SV=2                                   | -0,111106718 | 0,585832 |
| P05412 | Transcription factor AP-1 OS=Homo sapiens OX=9606 GN=JUN PE=1 SV=2                                                | -0,171805387 | 0,585762 |
| Q9HC36 | rRNA methyltransferase 3, mitochondrial OS=Homo sapiens OX=9606 GN=MRM3 PE=1 SV=2                                 | -0,17160741  | 0,585022 |
| Q8NB17 | Inactive C-alpha-formylglycine-generating enzyme 2 OS=Homo sapiens OX=9606 GN=SUMF2 PE=1 SV=2                     | 0,123376772  | 0,584901 |
| Q8N4Q1 | Mitochondrial intermembrane space import and assembly protein 40 OS=Homo sapiens OX=9606 GN=CHCHD4 PE=1 SV=1      | -0,141040606 | 0,583142 |
| O43464 | Serine protease HTRA2, mitochondrial OS=Homo sapiens OX=9606 GN=HTRA2 PE=1 SV=2                                   | 0,123003387  | 0,582886 |
| Q8N3C0 | Activating signal cointegrator 1 complex subunit 3 OS=Homo sapiens OX=9606 GN=ASCC3 PE=1 SV=3                     | 0,075702618  | 0,582881 |
| P07203 | Glutathione peroxidase 1 OS=Homo sapiens OX=9606 GN=GPX1 PE=1 SV=4                                                | 0,083424097  | 0,582831 |
| Q9Y2T2 | AP-3 complex subunit mu-1 OS=Homo sapiens OX=9606 GN=AP3M1 PE=1 SV=1                                              | 0,075599621  | 0,582831 |
| Q9NQ88 | Fructose-2,6-bisphosphatase TIGAR OS=Homo sapiens OX=9606 GN=TIGAR PE=1 SV=1                                      | 0,170689978  | 0,581594 |
| Q99996 | A-kinase anchor protein 9 OS=Homo sapiens OX=9606 GN=AKAP9 PE=1 SV=4                                              | 0,241080682  | 0,581061 |
| Q9GZ78 | Mitochondrial fission factor OS=Homo sapiens OX=9606 GN=MFF PE=1 SV=1                                             | -0,110288235 | 0,580934 |
| Q965B3 | Neurabin-2 OS=Homo sapiens OX=9606 GN=PPP1R9B PE=1 SV=3                                                           | -0,110054484 | 0,579537 |
| P26572 | Alpha-1,3-mannosyl-glycoprotein 2-beta-N-acetylglucosaminyltransferase OS=Homo sapiens OX=9606 GN=MGAT1 PE=1 SV=1 | -0,109986052 | 0,579128 |
| P50135 | Histamine N-methyltransferase OS=Homo sapiens OX=9606 GN=HNMT PE=1 SV=1                                           | 0,093588195  | 0,578781 |
| Q13347 | Eukaryotic translation initiation factor 3 subunit I OS=Homo sapiens OX=9606 GN=EIF3I PE=1 SV=1                   | -0,060792901 | 0,57818  |
| Q9H7C9 | Mth938 domain-containing protein OS=Homo sapiens OX=9606 GN=AAMDCE PE=1 SV=1                                      | -0,139847189 | 0,577626 |
| Q6ZMG9 | Ceramide synthase 6 OS=Homo sapiens OX=9606 GN=CERS6 PE=1 SV=1                                                    | -0,239677445 | 0,577609 |
| Q96646 | tRNA-dihydrouridine(47) synthase [NAD(P)(+)]-like OS=Homo sapiens OX=9606 GN=DUS3L PE=1 SV=2                      | -0,139826624 | 0,577531 |
| P08962 | CD63 antigen OS=Homo sapiens OX=9606 GN=CD63 PE=1 SV=2                                                            | -0,239481796 | 0,577128 |
| P02462 | Collagen alpha-1(IV) chain OS=Homo sapiens OX=9606 GN=COL4A1 PE=1 SV=4                                            | 0,109600989  | 0,576827 |
| P48960 | CD97 antigen OS=Homo sapiens OX=9606 GN=CD97 PE=1 SV=4                                                            | -0,071907077 | 0,576784 |
| Q9NQ55 | Suppressor of SWI4 1 homolog OS=Homo sapiens OX=9606 GN=PPAN PE=2 SV=1                                            | 0,109574098  | 0,576667 |
| P22090 | 40S ribosomal protein S4, Y isoform 1 OS=Homo sapiens OX=9606 GN=RPS4Y1 PE=1 SV=2                                 | 0,069131014  | 0,576513 |
| Q969H8 | Myeloid-derived growth factor OS=Homo sapiens OX=9606 GN=MYDGF PE=1 SV=1                                          | -0,109535806 | 0,576438 |
| P84095 | Rho-related GTP-binding protein RhoG OS=Homo sapiens OX=9606 GN=RHOGE PE=1 SV=1                                   | 0,109432537  | 0,575822 |
| Q6IQ49 | Replication stress response regulator SDE2 OS=Homo sapiens OX=9606 GN=SDE2 PE=1 SV=1                              | 0,169004833  | 0,575305 |
| Q9UGJ1 | Gamma-tubulin complex component 4 OS=Homo sapiens OX=9606 GN=TUBGCP4 PE=1 SV=1                                    | 0,238535433  | 0,574798 |
| Q8NBF2 | NHL repeat-containing protein 2 OS=Homo sapiens OX=9606 GN=NHLRC2 PE=1 SV=1                                       | 0,074640296  | 0,573505 |
| Q12933 | TNF receptor-associated factor 2 OS=Homo sapiens OX=9606 GN=TRAF2 PE=1 SV=2                                       | 0,138830087  | 0,572931 |
| Q99470 | Stromal cell-derived factor 2 OS=Homo sapiens OX=9606 GN=SDF2 PE=1 SV=2                                           | 0,168284326  | 0,572617 |
| Q9UBG0 | C-type mannose receptor 2 OS=Homo sapiens OX=9606 GN=MRC2 PE=1 SV=2                                               | 0,048923798  | 0,572591 |
| Q6P9B9 | Integrator complex subunit 5 OS=Homo sapiens OX=9606 GN=INTS5 PE=1 SV=1                                           | 0,13872903   | 0,572465 |
| P42677 | 40S ribosomal protein S27 OS=Homo sapiens OX=9606 GN=RPS27 PE=1 SV=3                                              | -0,035202563 | 0,572059 |
| Q96RU3 | Formin-binding protein 1 OS=Homo sapiens OX=9606 GN=FNBP1 PE=1 SV=2                                               | 0,120895287  | 0,57164  |

|        |                                                                                                                                          |              |          |
|--------|------------------------------------------------------------------------------------------------------------------------------------------|--------------|----------|
| Q96GX9 | Methylthioribulose-1-phosphate dehydratase OS=Homo sapiens OX=9606 GN=APIP PE=1 SV=1                                                     | 0,167907913  | 0,571214 |
| Q724V5 | Hepatoma-derived growth factor-related protein 2 OS=Homo sapiens OX=9606 GN=HDGFL2 PE=1 SV=1                                             | 0,086746134  | 0,571097 |
| Q15365 | Poly(rC)-binding protein 1 OS=Homo sapiens OX=9606 GN=PCBP1 PE=1 SV=2                                                                    | -0,081939191 | 0,570968 |
| Q98XK5 | Bcl-2-like protein 13 OS=Homo sapiens OX=9606 GN=BCL2L13 PE=1 SV=1                                                                       | 0,167737629  | 0,570579 |
| O75110 | Probable phospholipid-transporting ATPase IIA OS=Homo sapiens OX=9606 GN=ATP9A PE=1 SV=3                                                 | -0,188609843 | 0,569777 |
| Q9NP16 | mRNA-decapping enzyme 1A OS=Homo sapiens OX=9606 GN=DCP1A PE=1 SV=3                                                                      | 0,167506863  | 0,569719 |
| O43583 | Density-regulated protein OS=Homo sapiens OX=9606 GN=DENR PE=1 SV=2                                                                      | 0,120526909  | 0,569676 |
| Q5JT29 | Alanine--tRNA ligase, mitochondrial OS=Homo sapiens OX=9606 GN=AARS2 PE=1 SV=1                                                           | -0,092291797 | 0,569643 |
| Q8N7X0 | Androglobin OS=Homo sapiens OX=9606 GN=ADGB PE=2 SV=3                                                                                    | -0,23636727  | 0,569459 |
| Q14696 | LRP chaperone MESD OS=Homo sapiens OX=9606 GN=MESD PE=1 SV=2                                                                             | 0,099285448  | 0,569123 |
| A6ZK13 | Retrotransposon Gag-like protein 8B OS=Homo sapiens OX=9606 GN=RTL8C PE=1 SV=1                                                           | -0,236139435 | 0,568897 |
| Q92917 | G-patch domain and KOW motifs-containing protein OS=Homo sapiens OX=9606 GN=GPKOW PE=1 SV=2                                              | -0,074071243 | 0,568497 |
| P07311 | Acylphosphatase-1 OS=Homo sapiens OX=9606 GN=ACYP1 PE=1 SV=2                                                                             | 0,235964675  | 0,568467 |
| P41250 | Glycine--tRNA ligase OS=Homo sapiens OX=9606 GN=GARS PE=1 SV=3                                                                           | 0,046018487  | 0,567755 |
| Q9UEW8 | STE20/SPS1-related proline-alanine-rich protein kinase OS=Homo sapiens OX=9606 GN=STK39 PE=1 SV=3                                        | 0,108076855  | 0,56774  |
| O60507 | Protein-tyrosine sulfotransferase 1 OS=Homo sapiens OX=9606 GN=TPST1 PE=1 SV=1                                                           | -0,235662174 | 0,567721 |
| Q9ULK4 | Mediator of RNA polymerase II transcription subunit 23 OS=Homo sapiens OX=9606 GN=MED23 PE=1 SV=2                                        | -0,086289676 | 0,567667 |
| Q5T457 | E3 ubiquitin-protein ligase UBR4 OS=Homo sapiens OX=9606 GN=UBR4 PE=1 SV=1                                                               | -0,023414563 | 0,567344 |
| Q9Y211 | Nischarin OS=Homo sapiens OX=9606 GN=NISCH PE=1 SV=3                                                                                     | 0,235485186  | 0,567205 |
| Q96BX8 | MOB kinase activator 3A OS=Homo sapiens OX=9606 GN=MOB3A PE=1 SV=1                                                                       | -0,235460849 | 0,567225 |
| O94875 | Sorbin and SH3 domain-containing protein 2 OS=Homo sapiens OX=9606 GN=SORBS2 PE=1 SV=3                                                   | 0,235083062  | 0,566294 |
| Q9NT15 | Sister chromatid cohesion protein PDS5 homolog B OS=Homo sapiens OX=9606 GN=PDS5B PE=1 SV=1                                              | -0,051452848 | 0,566055 |
| Q9H4A6 | Golgi phosphoprotein 3 OS=Homo sapiens OX=9606 GN=GOLPH3 PE=1 SV=1                                                                       | 0,091758443  | 0,565893 |
| Q6R327 | Rapamycin-insensitive companion of mTOR OS=Homo sapiens OX=9606 GN=RICTOR PE=1 SV=1                                                      | 0,41821066   | 0,565753 |
| Q9BT22 | Chitobiosylidiphosphodolichol beta-mannosyltransferase OS=Homo sapiens OX=9606 GN=ALG1 PE=1 SV=2                                         | -0,234719798 | 0,565399 |
| Q8IWI9 | MAX gene-associated protein OS=Homo sapiens OX=9606 GN=MGA PE=1 SV=4                                                                     | -0,087339487 | 0,564552 |
| Q965B4 | SRSF protein kinase 1 OS=Homo sapiens OX=9606 GN=SRPK1 PE=1 SV=2                                                                         | -0,107445441 | 0,563984 |
| Q8NOT1 | Ribosomal biogenesis factor OS=Homo sapiens OX=9606 GN=RBIS PE=1 SV=4                                                                    | -0,047089917 | 0,563810 |
| P51970 | NADH dehydrogenase [ubiquinone] 1 alpha subcomplex subunit 8 OS=Homo sapiens OX=9606 GN=NDUFA8 PE=1 SV=3                                 | -0,098393533 | 0,563314 |
| Q15046 | Lysine--tRNA ligase OS=Homo sapiens OX=9606 GN=KARS PE=1 SV=3                                                                            | 0,046474426  | 0,562904 |
| P54578 | Ubiquitin carboxyl-terminal hydrolase 14 OS=Homo sapiens OX=9606 GN=USP14 PE=1 SV=3                                                      | 0,050129791  | 0,562742 |
| Q99595 | Mitochondrial import inner membrane translocase subunit Tim17-A OS=Homo sapiens OX=9606 GN=TIMM17A PE=1 SV=1                             | -0,233565943 | 0,562554 |
| Q14160 | Protein scribble homolog OS=Homo sapiens OX=9606 GN=SCRIB PE=1 SV=4                                                                      | 0,065244603  | 0,562311 |
| O95163 | Elongator complex protein 1 OS=Homo sapiens OX=9606 GN=ELP1 PE=1 SV=3                                                                    | -0,053474291 | 0,562004 |
| Q6ZW31 | Rho GTPase-activating protein SYDE1 OS=Homo sapiens OX=9606 GN=SYDE1 PE=1 SV=1                                                           | 0,13634126   | 0,561469 |
| Q92925 | SWI/SNF-related matrix-associated actin-dependent regulator of chromatin subfamily D member 2 OS=Homo sapiens OX=9606 GN=DCAF7 PE=1 SV=1 | -0,136332845 | 0,56143  |
| P61962 | DBP1- and CUL4-associated factor 7 OS=Homo sapiens OX=9606 GN=DCAF7 PE=1 SV=1                                                            | -0,098050016 | 0,56108  |
| Q96HY6 | DDRGK domain-containing protein 1 OS=Homo sapiens OX=9606 GN=DDRGK1 PE=1 SV=2                                                            | 0,106886579  | 0,560663 |
| Q9NRY5 | Protein FAM114A2 OS=Homo sapiens OX=9606 GN=FAM114A2 PE=1 SV=4                                                                           | 0,091012689  | 0,560657 |
| Q9BVK2 | Probable dolichyl pyrophosphate Glc1Man9GlcNAc2 alpha-1,3-glucosyltransferase OS=Homo sapiens OX=9606 GN=ALG8                            | 0,232765512  | 0,56058  |
| P16298 | Serine/threonine-protein phosphatase 2B catalytic subunit beta isoform OS=Homo sapiens OX=9606 GN=PPP3CB PE=1 SV=1                       | 0,106802683  | 0,560164 |
| P82979 | SAP domain-containing ribonucleoprotein OS=Homo sapiens OX=9606 GN=SARNP PE=1 SV=3                                                       | 0,09786584   | 0,559883 |
| P40937 | Replication factor C subunit 5 OS=Homo sapiens OX=9606 GN=RFC5 PE=1 SV=1                                                                 | -0,064996761 | 0,559863 |
| Q8N1B4 | Vacuolar factor sorting-associated protein 52 homolog OS=Homo sapiens OX=9606 GN=VPS52 PE=1 SV=1                                         | 0,135859895  | 0,559256 |
| Q13555 | Calcium/calmodulin-dependent protein kinase type II subunit gamma OS=Homo sapiens OX=9606 GN=CAMK2G PE=1 SV=1                            | -0,106560113 | 0,558724 |
| Q86TB9 | Protein PAT1 homolog 1 OS=Homo sapiens OX=9606 GN=PATL1 PE=1 SV=2                                                                        | 0,135665614  | 0,558363 |
| Q01650 | Large neutral amino acids transporter small subunit 1 OS=Homo sapiens OX=9606 GN=SLC7A5 PE=1 SV=2                                        | 0,135560864  | 0,557882 |
| Q9GZR7 | ATP-dependent RNA helicase DDX24 OS=Homo sapiens OX=9606 GN=DDX24 PE=1 SV=1                                                              | -0,076260403 | 0,557502 |
| Q9NP11 | Bromodomain-containing protein 7 OS=Homo sapiens OX=9606 GN=BRD7 PE=1 SV=1                                                               | -0,231475041 | 0,557397 |
| P0C221 | Coiled-coil domain-containing protein 175 OS=Homo sapiens OX=9606 GN=CCDC175 PE=4 SV=2                                                   | 0,092879739  | 0,557164 |
| P83436 | Conserved oligomeric Golgi complex subunit 7 OS=Homo sapiens OX=9606 GN=COG7 PE=1 SV=1                                                   | -0,164074334 | 0,556942 |
| O15504 | Nucleoporin-like protein 2 OS=Homo sapiens OX=9606 GN=NUPL2 PE=1 SV=1                                                                    | 0,231244187  | 0,556827 |
| Q14257 | Reticulocalbin-2 OS=Homo sapiens OX=9606 GN=RCN2 PE=1 SV=1                                                                               | -0,069716168 | 0,556688 |
| P13929 | #N/D                                                                                                                                     | 0,11798785   | 0,556172 |
| Q9BTT6 | Leucine-rich repeat-containing protein 1 OS=Homo sapiens OX=9606 GN=LRRC1 PE=1 SV=1                                                      | 0,230859108  | 0,555877 |
| P28340 | DNA polymerase delta catalytic subunit OS=Homo sapiens OX=9606 GN=POLD1 PE=1 SV=2                                                        | -0,064539114 | 0,55535  |
| A6NHL2 | Tubulin alpha chain-like 3 OS=Homo sapiens OX=9606 GN=TUBAL3 PE=1 SV=2                                                                   | -0,163321119 | 0,554143 |
| P55327 | Tumor protein D52 OS=Homo sapiens OX=9606 GN=TPD52 PE=1 SV=2                                                                             | -0,096851166 | 0,553297 |
| O15514 | DNA-directed RNA polymerase II subunit RPB4 OS=Homo sapiens OX=9606 GN=POLR2D PE=1 SV=1                                                  | -0,105628043 | 0,553198 |
| P29144 | Tripeptidyl-peptidase 2 OS=Homo sapiens OX=9606 GN=TPP2 PE=1 SV=4                                                                        | -0,0435231   | 0,553043 |
| Q6XZF7 | Dynamin-binding protein OS=Homo sapiens OX=9606 GN=DNMBP PE=1 SV=1                                                                       | 0,089756777  | 0,551863 |
| O60443 | Gasdermin-E OS=Homo sapiens OX=9606 GN=GSDME PE=1 SV=2                                                                                   | -0,072127037 | 0,551458 |
| Q01844 | RNA-binding protein EWS OS=Homo sapiens OX=9606 GN=EWSR1 PE=1 SV=1                                                                       | -0,117092426 | 0,551424 |
| Q9UHA3 | Probable ribosome biogenesis protein RLP24 OS=Homo sapiens OX=9606 GN=RSL24D1 PE=1 SV=1                                                  | -0,131498477 | 0,550429 |
| A1X2B3 | SH3 and PX domain-containing protein 2B OS=Homo sapiens OX=9606 GN=SH3PX2B PE=1 SV=3                                                     | 0,083901838  | 0,549791 |
| Q9Y265 | RuvB-like 1 OS=Homo sapiens OX=9606 GN=RUVBL1 PE=1 SV=1                                                                                  | -0,075335129 | 0,549785 |
| O15484 | Calpain-5 OS=Homo sapiens OX=9606 GN=CAPN5 PE=1 SV=2                                                                                     | -0,096283983 | 0,549623 |
| O95140 | Mitofusin-2 OS=Homo sapiens OX=9606 GN=MFN2 PE=1 SV=3                                                                                    | -0,133746595 | 0,549557 |
| Q9Y3D6 | Mitochondrial fission 1 protein OS=Homo sapiens OX=9606 GN=MF1 PE=1 SV=2                                                                 | -0,161899039 | 0,548861 |
| Q96P48 | Arf-GAP with Rho-GAP domain, ANK repeat and PH domain-containing protein 1 OS=Homo sapiens OX=9606 GN=ARAP1 F                            | -0,075203889 | 0,548692 |
| O60613 | Selenoprotein F OS=Homo sapiens OX=9606 GN=SELENOF PE=1 SV=4                                                                             | 0,22790242   | 0,548577 |
| Q9NU22 | Midasin OS=Homo sapiens OX=9606 GN=MDN1 PE=1 SV=2                                                                                        | 0,161822229  | 0,548576 |
| P48426 | Phosphatidylinositol 5-phosphate 4-kinase type-2 alpha OS=Homo sapiens OX=9606 GN=PIP4K2A PE=1 SV=2                                      | -0,096098148 | 0,54842  |
| Q9ULH0 | Kinase D-interacting substrate of 220 kDa OS=Homo sapiens OX=9606 GN=KIDINS220 PE=1 SV=3                                                 | 0,133459563  | 0,548242 |
| Q8N684 | Cleavage and polyadenylation specificity factor subunit 7 OS=Homo sapiens OX=9606 GN=CPSF7 PE=1 SV=1                                     | -0,083573687 | 0,547344 |
| P54709 | Sodium/potassium-transporting ATPase subunit beta-3 OS=Homo sapiens OX=9606 GN=ATP1B3 PE=1 SV=1                                          | 0,133093011  | 0,546563 |
| Q5T2T1 | MAGUK p55 subfamily member 7 OS=Homo sapiens OX=9606 GN=MPP7 PE=1 SV=1                                                                   | 0,078797932  | 0,546049 |
| Q14151 | Scaffold attachment factor B2 OS=Homo sapiens OX=9606 GN=SAFB2 PE=1 SV=1                                                                 | 0,104357321  | 0,54568  |
| P20674 | Cytochrome c oxidase subunit 5A, mitochondrial OS=Homo sapiens OX=9606 GN=COX5A PE=1 SV=2                                                | -0,095636286 | 0,545433 |
| Q99570 | Phosphoinositide 3-kinase regulatory subunit 4 OS=Homo sapiens OX=9606 GN=PIK3R4 PE=1 SV=3                                               | 0,074801846  | 0,545347 |
| O96019 | Actin-like protein 6A OS=Homo sapiens OX=9606 GN=ACTL6A PE=1 SV=1                                                                        | 0,065778339  | 0,544598 |
| Q7KZ17 | Serine/threonine-protein kinase MARK2 OS=Homo sapiens OX=9606 GN=MARK2 PE=1 SV=2                                                         | 0,081505575  | 0,544574 |
| Q70702 | 60S ribosomal protein L18 OS=Homo sapiens OX=9606 GN=RPL18 PE=1 SV=2                                                                     | -0,083139504 | 0,54411  |
| P11177 | Pyruvate dehydrogenase E1 component subunit beta, mitochondrial OS=Homo sapiens OX=9606 GN=PDHB PE=1 SV=3                                | 0,068322013  | 0,543982 |
| P29034 | Protein S100-A2 OS=Homo sapiens OX=9606 GN=S100A2 PE=1 SV=3                                                                              | -0,225955461 | 0,543767 |
| Q8NDV7 | Trinucleotide repeat-containing gene 6A protein OS=Homo sapiens OX=9606 GN=TNRC6A PE=1 SV=2                                              | 0,509231505  | 0,543338 |
| Q13568 | Interferon regulatory factor 5 OS=Homo sapiens OX=9606 GN=IRF5 PE=1 SV=2                                                                 | -0,109195783 | 0,543307 |
| Q6P1A2 | Lysophospholipid acyltransferase 5 OS=Homo sapiens OX=9606 GN=LPCAT3 PE=1 SV=1                                                           | 0,3420618    | 0,543302 |
| P16070 | CD44 antigen OS=Homo sapiens OX=9606 GN=CD44 PE=1 SV=3                                                                                   | -0,082975992 | 0,542893 |
| Q86V48 | Leucine zipper protein 1 OS=Homo sapiens OX=9606 GN=LUZP1 PE=1 SV=2                                                                      | -0,051781351 | 0,541681 |
| Q01973 | Inactive tyrosine-protein kinase transmembrane receptor ROR1 OS=Homo sapiens OX=9606 GN=ROR1 PE=1 SV=2                                   | 0,225047873  | 0,541524 |

|        |                                                                                                             |              |          |
|--------|-------------------------------------------------------------------------------------------------------------|--------------|----------|
| Q14676 | Mediator of DNA damage checkpoint protein 1 OS=Homo sapiens OX=9606 GN=MDC1 PE=1 SV=3                       | -0,131958761 | 0,541373 |
| Q9UNQ2 | Probable dimethyladenosine transferase OS=Homo sapiens OX=9606 GN=DIMT1 PE=1 SV=1                           | -0,103560593 | 0,540977 |
| Q14814 | Myocyte-specific enhancer factor 2D OS=Homo sapiens OX=9606 GN=MEF2D PE=1 SV=1                              | -0,224560081 | 0,540318 |
| P17987 | T-complex protein 1 subunit alpha OS=Homo sapiens OX=9606 GN=TCP1 PE=1 SV=1                                 | 0,044035431  | 0,539745 |
| P51531 | Probable global transcription activator SNF2L2 OS=Homo sapiens OX=9606 GN=SMARCA2 PE=1 SV=2                 | 0,224287777  | 0,539645 |
| Q96LB3 | Intraflagellar transport protein 74 homolog OS=Homo sapiens OX=9606 GN=IFT74 PE=1 SV=1                      | -0,258401306 | 0,539121 |
| Q14103 | Heterogeneous nuclear ribonucleoprotein D0 OS=Homo sapiens OX=9606 GN=HNRNPD PE=1 SV=1                      | -0,065182995 | 0,538973 |
| Q16851 | UTP--glucose-1-phosphate uridylyltransferase OS=Homo sapiens OX=9606 GN=UGP2 PE=1 SV=5                      | 0,054147397  | 0,538937 |
| P17980 | 26S proteasome regulatory subunit 6A OS=Homo sapiens OX=9606 GN=PSM3C PE=1 SV=3                             | -0,057173764 | 0,538874 |
| Q96M27 | Protein PRRC1 OS=Homo sapiens OX=9606 GN=PRRC1 PE=1 SV=1                                                    | -0,087753266 | 0,537892 |
| O43709 | Probable 18S rRNA (guanine-N(7))-methyltransferase OS=Homo sapiens OX=9606 GN=BUD23 PE=1 SV=2               | -0,131069043 | 0,537307 |
| O75030 | #N/D                                                                                                        | -0,223188946 | 0,536928 |
| Q03113 | Guanine nucleotide-binding protein subunit alpha-12 OS=Homo sapiens OX=9606 GN=GNA12 PE=1 SV=4              | -0,223047812 | 0,536579 |
| Q9P053 | ORM1-like protein 1 OS=Homo sapiens OX=9606 GN=ORMDL1 PE=1 SV=1                                             | -0,088177164 | 0,536458 |
| Q07021 | Complement component 1 Q subcomponent-binding protein, mitochondrial OS=Homo sapiens OX=9606 GN=C1QB P PE=1 | 0,082102564  | 0,536401 |
| Q9Y3R5 | Protein dopey-2 OS=Homo sapiens OX=9606 GN=DOP1B PE=1 SV=5                                                  | -0,158443929 | 0,536051 |
| Q6P1N9 | Putative deoxyribonuclease TATDN1 OS=Homo sapiens OX=9606 GN=TATDN1 PE=1 SV=2                               | -0,130614406 | 0,535231 |
| Q9Y311 | F-box only protein 7 OS=Homo sapiens OX=9606 GN=FBXO7 PE=1 SV=1                                             | 0,31440937   | 0,534675 |
| P21291 | Cysteine and glycine-rich protein 1 OS=Homo sapiens OX=9606 GN=CSR1 PE=1 SV=3                               | -0,067285275 | 0,534575 |
| Q12894 | Interferon-related developmental regulator 2 OS=Homo sapiens OX=9606 GN=IFRD2 PE=1 SV=3                     | -0,222179917 | 0,534432 |
| Q9H1R3 | Myosin light chain kinase 2, skeletal/cardiac muscle OS=Homo sapiens OX=9606 GN=MYLK2 PE=1 SV=3             | -0,31279325  | 0,534241 |
| Q9NRF9 | DNA polymerase epsilon subunit 3 OS=Homo sapiens OX=9606 GN=POLE3 PE=1 SV=1                                 | -0,157949845 | 0,534222 |
| Q13190 | Syntaxin-5 OS=Homo sapiens OX=9606 GN=STX5 PE=1 SV=2                                                        | -0,13017974  | 0,533248 |
| P53618 | Coatomer subunit beta OS=Homo sapiens OX=9606 GN=COPB1 PE=1 SV=3                                            | -0,038622153 | 0,533106 |
| Q9NR48 | Histone-lysine N-methyltransferase ASH1L OS=Homo sapiens OX=9606 GN=ASH1L PE=1 SV=2                         | 0,157887056  | 0,532948 |
| Q8WX93 | Palladin OS=Homo sapiens OX=9606 GN=PALLD PE=1 SV=3                                                         | -0,221410736 | 0,532529 |
| O15020 | Spectrin beta chain, non-erythrocytic 2 OS=Homo sapiens OX=9606 GN=SPTBN2 PE=1 SV=3                         | -0,157474244 | 0,532462 |
| O75340 | Programmed cell death protein 6 OS=Homo sapiens OX=9606 GN=PDC6 PE=1 SV=1                                   | -0,081478727 | 0,531774 |
| Q8TBC3 | SH3KBP1-binding protein 1 OS=Homo sapiens OX=9606 GN=SHKBP1 PE=1 SV=2                                       | -0,220992027 | 0,531493 |
| Q9H444 | Charged multivesicular body protein 4b OS=Homo sapiens OX=9606 GN=CHMP4B PE=1 SV=1                          | -0,06692907  | 0,531351 |
| Q8BZ29 | Director of cytokinesis protein 9 OS=Homo sapiens OX=9606 GN=DOCK9 PE=1 SV=2                                | -0,157141035 | 0,531229 |
| Q9H000 | Probable E3 ubiquitin-protein ligase makorin-2 OS=Homo sapiens OX=9606 GN=MKRN2 PE=1 SV=2                   | 0,129644387  | 0,530806 |
| C9JR28 | Aldo-keto reductase family 1 member B15 OS=Homo sapiens OX=9606 GN=AKR1B15 PE=1 SV=2                        | 0,156101231  | 0,530782 |
| P55769 | NHP2-like protein 1 OS=Homo sapiens OX=9606 GN=SNU13 PE=1 SV=3                                              | -0,101813391 | 0,530689 |
| Q8N122 | Regulatory-associated protein of mTOR OS=Homo sapiens OX=9606 GN=RPTOR PE=1 SV=1                            | 0,12925245   | 0,529202 |
| O14933 | Ubiquitin/ISG15-conjugating enzyme E2 L6 OS=Homo sapiens OX=9606 GN=UBE2L6 PE=1 SV=4                        | 0,081095284  | 0,528935 |
| P08123 | Collagen alpha-2(I) chain OS=Homo sapiens OX=9606 GN=COL1A2 PE=1 SV=7                                       | 0,056227333  | 0,528698 |
| Q9Y217 | Myotubularin-related protein 6 OS=Homo sapiens OX=9606 GN=MTMR6 PE=1 SV=3                                   | 0,072628706  | 0,527344 |
| Q03701 | CCAAT/enhancer-binding protein zeta OS=Homo sapiens OX=9606 GN=CEBPZ PE=1 SV=3                              | -0,066482785 | 0,527318 |
| Q9Y3D0 | Cytosolic iron-sulfur assembly component 2B OS=Homo sapiens OX=9606 GN=CIAO2B PE=1 SV=1                     | 0,155974783  | 0,526917 |
| Q8NCG7 | Sn1-specific diacylglycerol lipase beta OS=Homo sapiens OX=9606 GN=DAGLB PE=1 SV=2                          | 0,155798652  | 0,526266 |
| Q8NSW9 | Refilin-B OS=Homo sapiens OX=9606 GN=RFLNB PE=1 SV=1                                                        | -0,155689645 | 0,525863 |
| Q8N9N8 | Probable RNA-binding protein EIF1AD OS=Homo sapiens OX=9606 GN=EIF1AD PE=1 SV=1                             | -0,218701914 | 0,525825 |
| O95295 | SNARE-associated protein Snapin OS=Homo sapiens OX=9606 GN=SNAPIN PE=1 SV=1                                 | -0,128543101 | 0,52579  |
| O43708 | Maleylacetoacetate isomerase OS=Homo sapiens OX=9606 GN=GSTZ1 PE=1 SV=3                                     | 0,155576241  | 0,525444 |
| O75439 | Mitochondrial-processing peptidase subunit beta OS=Homo sapiens OX=9606 GN=PMPCB PE=1 SV=2                  | -0,069102949 | 0,525181 |
| Q6P3X3 | Tetraproline repeat protein 27 OS=Homo sapiens OX=9606 GN=TT27 PE=1 SV=1                                    | -0,15538583  | 0,524741 |
| P63241 | Eukaryotic translation initiation factor 5A-1 OS=Homo sapiens OX=9606 GN=EIF5A PE=1 SV=2                    | 0,100793928  | 0,524703 |
| Q9NPF5 | DNA methyltransferase 1-associated protein 1 OS=Homo sapiens OX=9606 GN=DMAP1 PE=1 SV=1                     | 0,138694832  | 0,524383 |
| P25208 | Nuclear transcription factor Y subunit beta OS=Homo sapiens OX=9606 GN=NFYB PE=1 SV=2                       | -0,217940195 | 0,523939 |
| Q9BPX5 | Actin-related protein 2/3 complex subunit 5-like protein OS=Homo sapiens OX=9606 GN=ARPC5L PE=1 SV=1        | 0,100625147  | 0,523713 |
| Q86VR2 | Reticulophagy regulator 3 OS=Homo sapiens OX=9606 GN=RETRG3 PE=1 SV=1                                       | 0,12807883   | 0,523677 |
| Q9H553 | Alpha-1,3/1,6-mannosyltransferase ALG2 OS=Homo sapiens OX=9606 GN=ALG2 PE=1 SV=1                            | 0,155076645  | 0,523599 |
| O15164 | Transcription intermediary factor 1-alpha OS=Homo sapiens OX=9606 GN=TRIM24 PE=1 SV=3                       | -0,111792144 | 0,523464 |
| Q9BRL6 | Serine/arginine-rich splicing factor 8 OS=Homo sapiens OX=9606 GN=SRSF8 PE=1 SV=1                           | -0,15503712  | 0,523453 |
| O75027 | RNA-binding cassette sub-family B member 7, mitochondrial OS=Homo sapiens OX=9606 GN=ABCB7 PE=1 SV=2        | -0,154865091 | 0,522818 |
| Q5JPH6 | Probable glutamate--tRNA ligase, mitochondrial OS=Homo sapiens OX=9606 GN=EAR2S2 PE=1 SV=2                  | 0,217472279  | 0,522778 |
| Q8NFC8 | Torsin-1A-interacting protein 2 OS=Homo sapiens OX=9606 GN=TOR1AIP2 PE=1 SV=1                               | -0,061179841 | 0,522466 |
| O14653 | Golgi SNAP receptor complex member 2 OS=Homo sapiens OX=9606 GN=GOSR2 PE=1 SV=2                             | -0,127690358 | 0,521291 |
| Q13443 | Disintegrin and metalloproteinase domain-containing protein 9 OS=Homo sapiens OX=9606 GN=ADAM9 PE=1 SV=1    | -0,080139839 | 0,521872 |
| Q00536 | Cyclin-dependent kinase 16 OS=Homo sapiens OX=9606 GN=CDK16 PE=1 SV=1                                       | 0,282908424  | 0,521284 |
| P18621 | 60S ribosomal protein L17 OS=Homo sapiens OX=9606 GN=RPL17 PE=1 SV=3                                        | -0,091775216 | 0,520586 |
| O15212 | Prefoldin subunit 6 OS=Homo sapiens OX=9606 GN=PFDN6 PE=1 SV=1                                              | -0,100019436 | 0,520164 |
| P53667 | LIM domain kinase 1 OS=Homo sapiens OX=9606 GN=LIMK1 PE=1 SV=3                                              | 0,245354     | 0,519123 |
| O75832 | 26S proteasome non-ATPase regulatory subunit 10 OS=Homo sapiens OX=9606 GN=PSMD10 PE=1 SV=1                 | -0,084986528 | 0,518719 |
| Q9BTL3 | RNA guanine-N7 methyltransferase activating subunit OS=Homo sapiens OX=9606 GN=RAMAC PE=1 SV=1              | -0,153560232 | 0,518001 |
| Q9H6T3 | RNA polymerase II-associated protein 3 OS=Homo sapiens OX=9606 GN=RPAP3 PE=1 SV=2                           | 0,071478944  | 0,51787  |
| Q5HYI8 | Rab-like protein 3 OS=Homo sapiens OX=9606 GN=RABL3 PE=1 SV=1                                               | -0,215427985 | 0,517716 |
| O43776 | Asparagine--tRNA ligase, cytoplasmic OS=Homo sapiens OX=9606 GN=NARS PE=1 SV=1                              | 0,053652059  | 0,517426 |
| Q9H6V9 | Lipid droplet-associated hydrolase OS=Homo sapiens OX=9606 GN=LDAH PE=1 SV=1                                | -0,153331625 | 0,517158 |
| P08237 | ATP-dependent 6-phosphofruktokinase, muscle type OS=Homo sapiens OX=9606 GN=PFKM PE=1 SV=2                  | 0,055133569  | 0,516991 |
| Q8N7H5 | RNA polymerase II-associated factor 1 homolog OS=Homo sapiens OX=9606 GN=PAF1 PE=1 SV=2                     | 0,074993701  | 0,516187 |
| Q92567 | Protein FAM168A OS=Homo sapiens OX=9606 GN=FAM168A PE=1 SV=2                                                | -0,214798136 | 0,516156 |
| Q9H5N1 | Rab GTPase-binding effector protein 2 OS=Homo sapiens OX=9606 GN=RABEP2 PE=1 SV=2                           | -0,084533333 | 0,515592 |
| Q14999 | Cullin-7 OS=Homo sapiens OX=9606 GN=CUL7 PE=1 SV=2                                                          | 0,099208277  | 0,515418 |
| Q9BTC0 | Death-inducer obliterator 1 OS=Homo sapiens OX=9606 GN=DIDO1 PE=1 SV=5                                      | 0,079258436  | 0,515374 |
| P30307 | M-phase inducer phosphatase 3 OS=Homo sapiens OX=9606 GN=CDC25C PE=1 SV=2                                   | 0,06278286   | 0,515342 |
| P03891 | NADH-ubiquinone oxidoreductase chain 2 OS=Homo sapiens OX=9606 GN=MT-ND2 PE=1 SV=2                          | -0,214436526 | 0,515126 |
| Q5T2E6 | Armado-like helical domain-containing protein 3 OS=Homo sapiens OX=9606 GN=ARMH3 PE=1 SV=1                  | -0,152735586 | 0,51496  |
| Q5SW79 | Centrosomal protein of 170 kDa OS=Homo sapiens OX=9606 GN=CEP170 PE=1 SV=1                                  | -0,035566242 | 0,51418  |
| P27449 | V-type proton ATPase 16 kDa proteolipid subunit OS=Homo sapiens OX=9606 GN=ATP6VOC PE=1 SV=1                | -0,213874015 | 0,513865 |
| P55795 | Heterogeneous nuclear ribonucleoprotein H2 OS=Homo sapiens OX=9606 GN=HNRNP2 PE=1 SV=1                      | -0,109959759 | 0,513858 |
| O95747 | Serine/threonine-protein kinase OSR1 OS=Homo sapiens OX=9606 GN=OSR1 PE=1 SV=1                              | -0,053270845 | 0,513242 |
| O75506 | Heat shock factor-binding protein 1 OS=Homo sapiens OX=9606 GN=HSBP1 PE=1 SV=1                              | 0,125778552  | 0,513229 |
| Q96EY5 | Multivesicular body subunit 12A OS=Homo sapiens OX=9606 GN=MVB12A PE=1 SV=1                                 | -0,213547756 | 0,513057 |
| Q75153 | Clustered mitochondria protein homolog OS=Homo sapiens OX=9606 GN=CLUH PE=1 SV=2                            | -0,050557871 | 0,512876 |
| Q9UJ68 | Mitochondrial peptide methionine sulfoxide reductase OS=Homo sapiens OX=9606 GN=MSRA PE=1 SV=1              | -0,125689291 | 0,512824 |
| P23610 | Factor VIII intron 22 protein OS=Homo sapiens OX=9606 GN=F8A1 PE=1 SV=2                                     | -0,215524406 | 0,512778 |
| Q15800 | Methylsterol monooxygenase 1 OS=Homo sapiens OX=9606 GN=MSMO1 PE=1 SV=1                                     | -0,213208666 | 0,512216 |
| Q9Y547 | Intraflagellar transport protein 25 homolog OS=Homo sapiens OX=9606 GN=HSPB11 PE=1 SV=1                     | -0,125477618 | 0,511864 |
| Q9H074 | Polyadenylate-binding protein-interacting protein 1 OS=Homo sapiens OX=9606 GN=PAIP1 PE=1 SV=1              | -0,078764396 | 0,511739 |

|        |                                                                                                        |              |          |
|--------|--------------------------------------------------------------------------------------------------------|--------------|----------|
| P48651 | Phosphatidyserine synthase 1 OS=Homo sapiens OX=9606 GN=PTDSS1 PE=1 SV=1                               | 0,212822387  | 0,511259 |
| Q9P2I0 | Cleavage and polyadenylation specificity factor subunit 2 OS=Homo sapiens OX=9606 GN=CPSF2 PE=1 SV=2   | 0,109325157  | 0,510538 |
| Q9H999 | Pantothenate kinase 3 OS=Homo sapiens OX=9606 GN=PANK3 PE=1 SV=1                                       | 0,073746742  | 0,510487 |
| Q9BUR4 | Telomerase Cajal body protein 1 OS=Homo sapiens OX=9606 GN=WRAP53 PE=1 SV=1                            | -0,151475969 | 0,510319 |
| Q5TA50 | Ceramide-1-phosphate transfer protein OS=Homo sapiens OX=9606 GN=CPTP PE=1 SV=1                        | -0,212204028 | 0,509726 |
| P04626 | Receptor tyrosine-protein kinase erbB-2 OS=Homo sapiens OX=9606 GN=ERBB2 PE=1 SV=1                     | -0,212158176 | 0,509612 |
| Q8IYB5 | Small membrane-associated protein 1 OS=Homo sapiens OX=9606 GN=SMAP1 PE=1 SV=2                         | -0,212094002 | 0,509453 |
| P22033 | Methylmalonyl-CoA mutase, mitochondrial OS=Homo sapiens OX=9606 GN=MMUT PE=1 SV=4                      | 0,078405851  | 0,509105 |
| P04075 | Fructose-bisphosphate aldolase A OS=Homo sapiens OX=9606 GN=ALDOA PE=1 SV=2                            | -0,041817512 | 0,508803 |
| Q9NZ32 | Actin-related protein 10 OS=Homo sapiens OX=9606 GN=ACTR10 PE=1 SV=1                                   | -0,064400397 | 0,508585 |
| Q12986 | Transcriptional repressor NF-X1 OS=Homo sapiens OX=9606 GN=NFX1 PE=1 SV=2                              | 0,059058106  | 0,508288 |
| Q08170 | Serine/arginine-rich splicing factor 4 OS=Homo sapiens OX=9606 GN=SRSF4 PE=1 SV=2                      | 0,127940955  | 0,508213 |
| Q9H098 | Protein FAM107B OS=Homo sapiens OX=9606 GN=FAM107B PE=1 SV=1                                           | 0,211490584  | 0,507957 |
| Q8NSI2 | Arrestin domain-containing protein 1 OS=Homo sapiens OX=9606 GN=ARRDC1 PE=1 SV=1                       | 0,10653917   | 0,507376 |
| O14818 | Proteasome subunit alpha type-7 OS=Homo sapiens OX=9606 GN=PSMA7 PE=1 SV=1                             | 0,070158494  | 0,507035 |
| O94927 | HAUS augmin-like complex subunit 5 OS=Homo sapiens OX=9606 GN=HAUS5 PE=1 SV=2                          | -0,150573204 | 0,506995 |
| Q9BYK8 | Helicase with zinc finger domain 2 OS=Homo sapiens OX=9606 GN=HELZ2 PE=1 SV=6                          | 0,063829753  | 0,506775 |
| Q9Y2D4 | Exocyst complex component 6B OS=Homo sapiens OX=9606 GN=EXOC6B PE=1 SV=3                               | 0,089596745  | 0,506667 |
| Q14161 | ARF GTPase-activating protein GIT2 OS=Homo sapiens OX=9606 GN=GIT2 PE=1 SV=2                           | -0,150356334 | 0,506197 |
| Q04837 | Single-stranded DNA-binding protein, mitochondrial OS=Homo sapiens OX=9606 GN=SSBP1 PE=1 SV=1          | -0,097622945 | 0,506166 |
| P48147 | Prolyl endopeptidase OS=Homo sapiens OX=9606 GN=PREP PE=1 SV=2                                         | 0,055708355  | 0,505785 |
| Q9BFX7 | UPF0415 protein C7orf25 OS=Homo sapiens OX=9606 GN=C7orf25 PE=1 SV=1                                   | -0,150223063 | 0,505707 |
| Q86UK7 | E3 ubiquitin-protein ligase ZNF598 OS=Homo sapiens OX=9606 GN=ZNF598 PE=1 SV=1                         | 0,077902466  | 0,50541  |
| P21980 | Protein-glutamine gamma-glutamyltransferase 2 OS=Homo sapiens OX=9606 GN=TGM2 PE=1 SV=2                | 0,033450339  | 0,504859 |
| Q5TC82 | Roquin-1 OS=Homo sapiens OX=9606 GN=RC3H1 PE=1 SV=1                                                    | -0,093076854 | 0,50483  |
| Q9HZC0 | Gigaxonin OS=Homo sapiens OX=9606 GN=GAN PE=1 SV=1                                                     | -0,210029437 | 0,504333 |
| Q92896 | Golgi apparatus protein 1 OS=Homo sapiens OX=9606 GN=GLG1 PE=1 SV=2                                    | -0,032666334 | 0,504084 |
| Q9Y5Y5 | Peroxisomal membrane protein PEX16 OS=Homo sapiens OX=9606 GN=PEX16 PE=1 SV=2                          | -0,209916236 | 0,504053 |
| Q9NYY8 | FAST kinase domain-containing protein 2, mitochondrial OS=Homo sapiens OX=9606 GN=FASTKD2 PE=1 SV=1    | -0,089087133 | 0,503422 |
| Q96ER9 | Coiled-coil domain-containing protein 51 OS=Homo sapiens OX=9606 GN=CCDC51 PE=1 SV=2                   | 0,123527261  | 0,503034 |
| O95208 | Epsin-2 OS=Homo sapiens OX=9606 GN=EPN2 PE=1 SV=3                                                      | 0,209500947  | 0,503023 |
| Q08211 | ATP-dependent RNA helicase A OS=Homo sapiens OX=9606 GN=DHX9 PE=1 SV=4                                 | -0,030155932 | 0,502936 |
| Q6P1J9 | Parafibromin OS=Homo sapiens OX=9606 GN=CDC73 PE=1 SV=1                                                | -0,069654535 | 0,502912 |
| Q71D13 | Histone H3.2 OS=Homo sapiens OX=9606 GN=HIST2H3A PE=1 SV=3                                             | 0,209346266  | 0,502639 |
| Q96D53 | Atypical kinase COQ8B, mitochondrial OS=Homo sapiens OX=9606 GN=COQ8B PE=1 SV=2                        | -0,149326617 | 0,50241  |
| Q96AG4 | Leucine-rich repeat-containing protein 59 OS=Homo sapiens OX=9606 GN=LRRC59 PE=1 SV=1                  | 0,063695115  | 0,502272 |
| Q6ZUT6 | Coiled-coil domain-containing protein 9B OS=Homo sapiens OX=9606 GN=CCDC9B PE=1 SV=1                   | 0,123299907  | 0,502006 |
| P16871 | Interleukin-7 receptor subunit alpha OS=Homo sapiens OX=9606 GN=IL7R PE=1 SV=3                         | -0,209048991 | 0,501901 |
| O75915 | PRA1 family protein 3 OS=Homo sapiens OX=9606 GN=ARL6IP5 PE=1 SV=1                                     | 0,096818635  | 0,501484 |
| Q9NR50 | Translation initiation factor eIF-2B subunit gamma OS=Homo sapiens OX=9606 GN=EIF2B3 PE=1 SV=1         | 0,066316476  | 0,501211 |
| Q9UPR3 | Protein SMG5 OS=Homo sapiens OX=9606 GN=SMG5 PE=1 SV=3                                                 | 0,208550334  | 0,500664 |
| Q9BX56 | Nucleolar and spindle-associated protein 1 OS=Homo sapiens OX=9606 GN=NUSAP1 PE=1 SV=1                 | 0,122827199  | 0,49987  |
| Q969T4 | Ubiquitin-conjugating enzyme E2 E3 OS=Homo sapiens OX=9606 GN=UBE2E3 PE=1 SV=1                         | 0,030549631  | 0,499088 |
| P53985 | Monocarboxylate transporter 1 OS=Homo sapiens OX=9606 GN=SLC16A1 PE=1 SV=3                             | 0,106872635  | 0,497744 |
| Q8IXQ4 | GPALPP motifs-containing protein 1 OS=Homo sapiens OX=9606 GN=GPALPP1 PE=1 SV=1                        | -0,361594373 | 0,496886 |
| P30626 | Sorcini OS=Homo sapiens OX=9606 GN=SRI PE=1 SV=1                                                       | 0,081789488  | 0,496737 |
| P55347 | Homeobox protein PKNOX1 OS=Homo sapiens OX=9606 GN=PKNOX1 PE=1 SV=3                                    | 0,20627357   | 0,495015 |
| Q96FJ2 | Dynein light chain 2, cytoplasmic OS=Homo sapiens OX=9606 GN=DYNLL2 PE=1 SV=1                          | -0,106277595 | 0,494648 |
| O75396 | Vesicle-trafficking protein SEC22b OS=Homo sapiens OX=9606 GN=SEC22B PE=1 SV=4                         | 0,081469406  | 0,494547 |
| Q8IWX8 | Calcium homeostasis endoplasmic reticulum protein OS=Homo sapiens OX=9606 GN=CHERP PE=1 SV=3           | -0,058267848 | 0,494314 |
| Q9BRX2 | Protein pelota homolog OS=Homo sapiens OX=9606 GN=PELO PE=1 SV=2                                       | 0,087620516  | 0,494103 |
| Q53F19 | Nuclear cap-binding protein subunit 3 OS=Homo sapiens OX=9606 GN=NCBP3 PE=1 SV=2                       | -0,146967984 | 0,493746 |
| P62256 | Ubiquitin-conjugating enzyme E2 H OS=Homo sapiens OX=9606 GN=UBE2H PE=1 SV=1                           | -0,106056096 | 0,493496 |
| Q9P2B2 | Prostaglandin F2 receptor negative regulator OS=Homo sapiens OX=9606 GN=PTGFRN PE=1 SV=2               | -0,205548476 | 0,493215 |
| P45880 | Voltage-dependent anion-selective channel protein 2 OS=Homo sapiens OX=9606 GN=VDAC2 PE=1 SV=2         | 0,065373863  | 0,493155 |
| Q14554 | Protein disulfide-isomerase A5 OS=Homo sapiens OX=9606 GN=PDIAS PE=1 SV=1                              | 0,382402583  | 0,492584 |
| Q04656 | Copper-transporting ATPase 1 OS=Homo sapiens OX=9606 GN=ATP7A PE=1 SV=4                                | 1,56724764   | 0,492544 |
| Q9UHY7 | Enolase-phosphatase E1 OS=Homo sapiens OX=9606 GN=ENOPH1 PE=1 SV=1                                     | -0,121128973 | 0,492208 |
| Q9H0U6 | 39S ribosomal protein L18, mitochondrial OS=Homo sapiens OX=9606 GN=MRPL18 PE=1 SV=1                   | -0,146538337 | 0,49217  |
| Q5VUA4 | Zinc finger protein 318 OS=Homo sapiens OX=9606 GN=ZNF318 PE=1 SV=2                                    | -0,205121842 | 0,492156 |
| Q15388 | Mitochondrial import receptor subunit TOM20 homolog OS=Homo sapiens OX=9606 GN=TOMM20 PE=1 SV=1        | -0,146512545 | 0,492075 |
| P43353 | Aldehyde dehydrogenase family 3 member B1 OS=Homo sapiens OX=9606 GN=ALDH3B1 PE=1 SV=1                 | 0,138125777  | 0,491681 |
| Q13325 | Interferon-induced protein with tetratricopeptide repeats 5 OS=Homo sapiens OX=9606 GN=IFIT5 PE=1 SV=1 | -0,065156219 | 0,491299 |
| Q5VTE6 | Protein argon homolog 2 OS=Homo sapiens OX=9606 GN=ANGEL2 PE=2 SV=1                                    | 0,20455195   | 0,490741 |
| P41091 | Eukaryotic translation initiation factor 2 subunit 3 OS=Homo sapiens OX=9606 GN=EIF2S3 PE=1 SV=3       | 0,045336731  | 0,48988  |
| Q96555 | ATPase WRNIP1 OS=Homo sapiens OX=9606 GN=WRNIP1 PE=1 SV=2                                              | -0,080716644 | 0,489403 |
| P09234 | U1 small nuclear ribonucleoprotein C OS=Homo sapiens OX=9606 GN=SNRPC PE=1 SV=1                        | 0,145760611  | 0,489318 |
| P60059 | Protein transport protein Sec61 subunit gamma OS=Homo sapiens OX=9606 GN=SEC61G PE=1 SV=1              | 0,203810338  | 0,4889   |
| P14550 | Aldo-keto reductase family 1 member A1 OS=Homo sapiens OX=9606 GN=AKR1A1 PE=1 SV=3                     | -0,071468323 | 0,488825 |
| O75884 | Putative hydrolase RBBP9 OS=Homo sapiens OX=9606 GN=RBBP9 PE=1 SV=2                                    | -0,120288462 | 0,488423 |
| Q15054 | DNA polymerase delta subunit 3 OS=Homo sapiens OX=9606 GN=POLD3 PE=1 SV=2                              | -0,145311743 | 0,487673 |
| Q5VTR2 | E3 ubiquitin-protein ligase BRE1A OS=Homo sapiens OX=9606 GN=RNF20 PE=1 SV=2                           | 0,052369041  | 0,487655 |
| Q9NUQ2 | 1-acyl-sn-glycerol-3-phosphate acyltransferase epsilon OS=Homo sapiens OX=9606 GN=AGPAT5 PE=1 SV=3     | 0,191995897  | 0,487369 |
| Q96BM9 | ADP-ribosylation factor-like protein 8A OS=Homo sapiens OX=9606 GN=ARL8A PE=1 SV=1                     | 0,080390603  | 0,487178 |
| P46100 | Transcriptional regulator ATRX OS=Homo sapiens OX=9606 GN=ATRX PE=1 SV=5                               | -0,080250734 | 0,486224 |
| Q9UBN7 | Histone deacetylase 6 OS=Homo sapiens OX=9606 GN=HDAC6 PE=1 SV=2                                       | -0,144902784 | 0,486174 |
| Q5TON5 | Formin-binding protein 1-like OS=Homo sapiens OX=9606 GN=FBNP1L PE=1 SV=3                              | -0,11971682  | 0,485851 |
| Q13873 | Bone morphogenetic protein receptor type-2 OS=Homo sapiens OX=9606 GN=BMPR2 PE=1 SV=2                  | -0,405836522 | 0,485683 |
| Q9Y376 | Calcium-binding protein 39 OS=Homo sapiens OX=9606 GN=CAB39 PE=1 SV=1                                  | 0,067423967  | 0,484745 |
| Q9H974 | Queuine tRNA-ribosyltransferase accessory subunit 2 OS=Homo sapiens OX=9606 GN=QTRT2 PE=1 SV=1         | -0,146326363 | 0,484295 |
| O95573 | Long-chain-fatty-acid--CoA ligase 3 OS=Homo sapiens OX=9606 GN=ACSL3 PE=1 SV=3                         | -0,044854314 | 0,483975 |
| Q9Y3C1 | Nucleolar protein 16 OS=Homo sapiens OX=9606 GN=NOP16 PE=1 SV=2                                        | -0,093776769 | 0,483848 |
| Q65ZW1 | Sterile alpha and TIR motif-containing protein 1 OS=Homo sapiens OX=9606 GN=SARM1 PE=1 SV=1            | -0,064247    | 0,483526 |
| P24385 | G1/S-specific cyclin-D1 OS=Homo sapiens OX=9606 GN=CCND1 PE=1 SV=1                                     | 0,15824162   | 0,483271 |
| P51790 | H(+)/Cl(-) exchange transporter 3 OS=Homo sapiens OX=9606 GN=CLCN3 PE=1 SV=2                           | 0,150976133  | 0,483267 |
| Q9BYJ9 | YTH domain-containing family protein 1 OS=Homo sapiens OX=9606 GN=YTHDF1 PE=1 SV=1                     | 0,143879089  | 0,482426 |
| P27635 | 60S ribosomal protein L10 OS=Homo sapiens OX=9606 GN=RPL10 PE=1 SV=4                                   | -0,064043435 | 0,481813 |
| Q9NYL2 | Mitogen-activated protein kinase kinase kinase 20 OS=Homo sapiens OX=9606 GN=MAP3K20 PE=1 SV=3         | 0,074657882  | 0,481725 |
| Q00839 | Heterogeneous nuclear ribonucleoprotein U OS=Homo sapiens OX=9606 GN=HNRNPU PE=1 SV=6                  | -0,03916106  | 0,481302 |
| Q93084 | Sarcoplasmic/endoplasmic reticulum calcium ATPase 3 OS=Homo sapiens OX=9606 GN=ATP2A3 PE=1 SV=2        | 0,085574467  | 0,481159 |
| Q9Y478 | 5'-AMP-activated protein kinase subunit beta-1 OS=Homo sapiens OX=9606 GN=PRKAB1 PE=1 SV=4             | -0,200529627 | 0,480753 |

|        |                                                                                                                     |              |          |
|--------|---------------------------------------------------------------------------------------------------------------------|--------------|----------|
| Q96CS3 | FAS-associated factor 2 OS=Homo sapiens OX=9606 GN=FAF2 PE=1 SV=2                                                   | 0,061274545  | 0,480733 |
| Q8IWA5 | Choline transporter-like protein 2 OS=Homo sapiens OX=9606 GN=SLC44A2 PE=1 SV=3                                     | -0,103583612 | 0,480673 |
| Q8NEB9 | Phosphatidylinositol 3-kinase catalytic subunit type 3 OS=Homo sapiens OX=9606 GN=PIK3C3 PE=1 SV=1                  | -0,070358778 | 0,480276 |
| P28290 | Protein ITPRID2 OS=Homo sapiens OX=9606 GN=ITPRID2 PE=1 SV=3                                                        | -0,074423675 | 0,480024 |
| Q92615 | La-related protein 4B OS=Homo sapiens OX=9606 GN=LARP4B PE=1 SV=3                                                   | -0,079334881 | 0,479988 |
| P33240 | Cleavage stimulation factor subunit 2 OS=Homo sapiens OX=9606 GN=CSTF2 PE=1 SV=1                                    | -0,074374505 | 0,479667 |
| P48506 | Glutamate--cysteine ligase catalytic subunit OS=Homo sapiens OX=9606 GN=GCLC PE=1 SV=2                              | 0,235822115  | 0,479321 |
| Q9UUP2 | #N/D                                                                                                                | 0,303492072  | 0,478846 |
| P62312 | U6 snRNA-associated Sm-like protein LSm6 OS=Homo sapiens OX=9606 GN=LSM6 PE=1 SV=1                                  | -0,142784679 | 0,478422 |
| P10915 | Hyaluronan and proteoglycan link protein 1 OS=Homo sapiens OX=9606 GN=HAPLN1 PE=2 SV=2                              | -0,142628954 | 0,477853 |
| O43516 | WAS/WASL-interacting protein family member 1 OS=Homo sapiens OX=9606 GN=WIPF1 PE=1 SV=3                             | -0,199263917 | 0,477609 |
| Q12929 | Epidermal growth factor receptor kinase substrate 8 OS=Homo sapiens OX=9606 GN=EPS8 PE=1 SV=1                       | 0,199257799  | 0,477594 |
| Q15286 | Ras-related protein Rab-35 OS=Homo sapiens OX=9606 GN=RAB35 PE=1 SV=1                                               | -0,102844066 | 0,476849 |
| O43164 | E3 ubiquitin-protein ligase Praja-2 OS=Homo sapiens OX=9606 GN=PJA2 PE=1 SV=4                                       | -0,198714326 | 0,476243 |
| O15327 | Inositol polyphosphate 4-phosphatase type II OS=Homo sapiens OX=9606 GN=INPP4B PE=1 SV=4                            | 0,10262415   | 0,475713 |
| Q961C1 | Vam6/vps39-like protein OS=Homo sapiens OX=9606 GN=VPS39 PE=1 SV=2                                                  | 0,141943875  | 0,475349 |
| Q9BU23 | Lipase maturation factor 2 OS=Homo sapiens OX=9606 GN=LMF2 PE=1 SV=2                                                | -0,092257965 | 0,475086 |
| O00442 | RNA 3'-terminal phosphate cyclase OS=Homo sapiens OX=9606 GN=RTCA PE=1 SV=1                                         | 0,092141064  | 0,474413 |
| Q8WUW1 | Protein BRICK1 OS=Homo sapiens OX=9606 GN=BRK1 PE=1 SV=1                                                            | -0,092086913 | 0,474101 |
| O14924 | Regulator of G-protein signaling 12 OS=Homo sapiens OX=9606 GN=RGS12 PE=1 SV=1                                      | 0,302969244  | 0,473653 |
| P98082 | Disabled homolog 2 OS=Homo sapiens OX=9606 GN=DAB2 PE=1 SV=3                                                        | -0,066037007 | 0,473517 |
| Q8NCH0 | Carbohydrate sulfotransferase 14 OS=Homo sapiens OX=9606 GN=CHST14 PE=1 SV=2                                        | -0,102188851 | 0,473465 |
| P04150 | Glucocorticoid receptor OS=Homo sapiens OX=9606 GN=NR3C1 PE=1 SV=1                                                  | -0,116859553 | 0,473026 |
| P30049 | ATP synthase subunit delta, mitochondrial OS=Homo sapiens OX=9606 GN=ATP5F1D PE=1 SV=2                              | 0,197235064  | 0,472568 |
| Q99871 | HAUS augmin-like complex subunit 7 OS=Homo sapiens OX=9606 GN=HAUS7 PE=1 SV=3                                       | 0,141164901  | 0,472503 |
| Q9NX58 | Cell growth-regulating nucleolar protein OS=Homo sapiens OX=9606 GN=LYAR PE=1 SV=2                                  | 0,084175591  | 0,472346 |
| Q9GZ29 | Ubiquitin-like modifier-activating enzyme 5 OS=Homo sapiens OX=9606 GN=UBA5 PE=1 SV=1                               | -0,078208287 | 0,472337 |
| Q9BU89 | Deoxyhypusine hydroxylase OS=Homo sapiens OX=9606 GN=DOHH PE=1 SV=1                                                 | 0,073298506  | 0,471869 |
| P62273 | 40S ribosomal protein S29 OS=Homo sapiens OX=9606 GN=RPS29 PE=1 SV=2                                                | 0,196686963  | 0,471206 |
| Q6UWP2 | Dehydrogenase/reductase SDR family member 11 OS=Homo sapiens OX=9606 GN=DHRS11 PE=1 SV=1                            | -0,140776028 | 0,471084 |
| Q8WVB6 | Chromosome transmission fidelity protein 18 homolog OS=Homo sapiens OX=9606 GN=CHTF18 PE=1 SV=1                     | -0,196537202 | 0,470834 |
| Q9Y2U8 | Inner nuclear membrane protein Man1 OS=Homo sapiens OX=9606 GN=LMD3 PE=1 SV=2                                       | -0,446392928 | 0,470741 |
| Q13136 | Liprin-alpha-1 OS=Homo sapiens OX=9606 GN=PPFIA1 PE=1 SV=1                                                          | 0,083908329  | 0,470666 |
| Q9BUH6 | Protein PAXX OS=Homo sapiens OX=9606 GN=PAXX PE=1 SV=2                                                              | -0,196219413 | 0,470044 |
| Q9BQ95 | Evolutionarily conserved signaling intermediate in Toll pathway, mitochondrial OS=Homo sapiens OX=9606 GN=ECSIT PE= | 0,196202248  | 0,470001 |
| Q13488 | V-type proton ATPase 116 kDa subunit a isoform 3 OS=Homo sapiens OX=9606 GN=TCIRG1 PE=1 SV=3                        | 0,139765493  | 0,467397 |
| Q9H871 | E3 ubiquitin-protein transferase RMND5A OS=Homo sapiens OX=9606 GN=RMND5A PE=1 SV=1                                 | -0,195100152 | 0,467262 |
| P15104 | Glutamine synthetase OS=Homo sapiens OX=9606 GN=GLUL PE=1 SV=4                                                      | -0,195091172 | 0,46724  |
| Q9UK45 | U6 snRNA-associated Sm-like protein LSm7 OS=Homo sapiens OX=9606 GN=LSM7 PE=1 SV=1                                  | -0,1007267   | 0,465928 |
| Q6ZKQ5 | Protein MMS22-like OS=Homo sapiens OX=9606 GN=MMS22L PE=1 SV=3                                                      | 0,194384975  | 0,465485 |
| P30038 | Delta-1-pyrroline-5-carboxylate dehydrogenase, mitochondrial OS=Homo sapiens OX=9606 GN=ALDH4A1 PE=1 SV=3           | 0,208207795  | 0,465365 |
| P61803 | Dolichyl-diphosphooligosaccharide--protein glycosyltransferase subunit DAD1 OS=Homo sapiens OX=9606 GN=DAD1 PE=     | 0,139086063  | 0,46492  |
| Q9UM54 | Pre-mRNA-processing factor 19 OS=Homo sapiens OX=9606 GN=PRPF19 PE=1 SV=1                                           | 0,059458246  | 0,464697 |
| Q15459 | Splicing factor 3A subunit 1 OS=Homo sapiens OX=9606 GN=SF3A1 PE=1 SV=1                                             | -0,043269629 | 0,464685 |
| P60174 | Triosephosphate isomerase OS=Homo sapiens OX=9606 GN=TP1 PE=1 SV=3                                                  | 0,051600734  | 0,463795 |
| P20810 | Calpastatin OS=Homo sapiens OX=9606 GN=CAST PE=1 SV=4                                                               | -0,048596871 | 0,462539 |
| Q8IU81 | Interferon regulatory factor 2-binding protein 1 OS=Homo sapiens OX=9606 GN=IRF2BP1 PE=1 SV=1                       | -0,192822217 | 0,4616   |
| P08670 | Vimentin OS=Homo sapiens OX=9606 GN=VIM PE=1 SV=4                                                                   | -0,025932176 | 0,461568 |
| Q9NYP7 | Elongation of very long chain fatty acids protein 5 OS=Homo sapiens OX=9606 GN=ELOVL5 PE=1 SV=1                     | -0,192566456 | 0,460964 |
| P61956 | Small ubiquitin-related modifier 2 OS=Homo sapiens OX=9606 GN=SUMO2 PE=1 SV=3                                       | -0,192018006 | 0,459601 |
| P14859 | POU domain, class 2, transcription factor 1 OS=Homo sapiens OX=9606 GN=POU2F1 PE=1 SV=2                             | -0,137345229 | 0,45858  |
| Q8NBQ5 | Estradiol 17-beta-dehydrogenase 11 OS=Homo sapiens OX=9606 GN=HSD17B11 PE=1 SV=3                                    | -0,067490426 | 0,458314 |
| Q6F181 | Anamorfin OS=Homo sapiens OX=9606 GN=CIAPIN1 PE=1 SV=2                                                              | 0,0586473    | 0,457573 |
| Q06546 | GA-binding protein alpha chain OS=Homo sapiens OX=9606 GN=GABPA PE=1 SV=1                                           | -0,191036556 | 0,457161 |
| Q9POL0 | Vesicle-associated membrane protein-associated protein A OS=Homo sapiens OX=9606 GN=VAPA PE=1 SV=3                  | -0,058519721 | 0,456454 |
| P41252 | Isoleucine--tRNA ligase, cytoplasmic OS=Homo sapiens OX=9606 GN=IARS PE=1 SV=2                                      | -0,030461503 | 0,454461 |
| P07199 | Major centromere autoantigen B OS=Homo sapiens OX=9606 GN=CENPB PE=1 SV=2                                           | -0,034244173 | 0,454306 |
| P62166 | Neuronal calcium sensor 1 OS=Homo sapiens OX=9606 GN=NCS1 PE=1 SV=2                                                 | -0,189863026 | 0,454243 |
| Q9NPJ8 | NTF2-related export protein 2 OS=Homo sapiens OX=9606 GN=NXT2 PE=1 SV=1                                             | 0,136110774  | 0,454209 |
| Q9NWT6 | Hypoxia-inducible factor 1-alpha inhibitor OS=Homo sapiens OX=9606 GN=HIF1AN PE=1 SV=2                              | 0,081175512  | 0,453547 |
| Q92793 | CREB-binding protein OS=Homo sapiens OX=9606 GN=CREBBP PE=1 SV=3                                                    | -0,375772728 | 0,453033 |
| Q8N8N7 | Prostaglandin reductase 2 OS=Homo sapiens OX=9606 GN=PTGR2 PE=1 SV=1                                                | 0,14623152   | 0,452453 |
| Q92890 | Ubiquitin recognition factor in ER-associated degradation protein 1 OS=Homo sapiens OX=9606 GN=UFD1 PE=1 SV=3       | -0,06671543  | 0,452414 |
| P49848 | Transcription initiation factor TFIID subunit 6 OS=Homo sapiens OX=9606 GN=TAIF6 PE=1 SV=1                          | -0,189067834 | 0,452266 |
| O95067 | G2/mitotic-specific cyclin-B2 OS=Homo sapiens OX=9606 GN=CCNB2 PE=1 SV=1                                            | -0,189065676 | 0,452263 |
| P61421 | V-type proton ATPase subunit d 1 OS=Homo sapiens OX=9606 GN=ATP6VD1 PE=1 SV=1                                       | -0,088232526 | 0,452001 |
| Q969P0 | Immunoglobulin superfamily member 8 OS=Homo sapiens OX=9606 GN=IGSF8 PE=1 SV=1                                      | -0,188748119 | 0,451471 |
| Q9NWU2 | Glucose-induced degradation protein 8 homolog OS=Homo sapiens OX=9606 GN=GLD8 PE=1 SV=1                             | 0,11197309   | 0,451215 |
| Q8NI36 | WD repeat-containing protein 36 OS=Homo sapiens OX=9606 GN=WDR36 PE=1 SV=1                                          | 0,066535542  | 0,451047 |
| Q9NQ51 | Cell death regulator Aven OS=Homo sapiens OX=9606 GN=AVEN PE=1 SV=1                                                 | -0,13505932  | 0,45027  |
| P42285 | Exosome RNA helicase MTR4 OS=Homo sapiens OX=9606 GN=MTRX PE=1 SV=3                                                 | 0,038818929  | 0,449407 |
| Q6IN85 | Serine/threonine-protein phosphatase 4 regulatory subunit 3A OS=Homo sapiens OX=9606 GN=PPP4R3A PE=1 SV=1           | -0,087757029 | 0,449288 |
| P10515 | Dihydrolipoyllysine-residue acetyltransferase component of pyruvate dehydrogenase complex, mitochondrial OS=Homo s  | 0,070035235  | 0,448369 |
| P01130 | Low-density lipoprotein receptor OS=Homo sapiens OX=9606 GN=LDLR PE=1 SV=1                                          | 0,055356469  | 0,447963 |
| Q9NSK0 | Kinesin light chain 4 OS=Homo sapiens OX=9606 GN=KLC4 PE=1 SV=3                                                     | -0,069963825 | 0,447858 |
| Q15032 | R3H domain-containing protein 1 OS=Homo sapiens OX=9606 GN=R3HDM1 PE=1 SV=3                                         | 0,012318229  | 0,447577 |
| Q8NSN7 | 39S ribosomal protein L50, mitochondrial OS=Homo sapiens OX=9606 GN=MRPL50 PE=1 SV=2                                | 0,110718169  | 0,445638 |
| Q86VH2 | Kinesin-like protein KIF27 OS=Homo sapiens OX=9606 GN=KIF27 PE=2 SV=1                                               | 0,186391233  | 0,44561  |
| O14874 | [3-methyl-2-oxobutanoate dehydrogenase [lipamide]] kinase, mitochondrial OS=Homo sapiens OX=9606 GN=BCKDK PE=       | -0,249223995 | 0,445332 |
| P14649 | Myosin light chain 6B OS=Homo sapiens OX=9606 GN=MYL6B PE=1 SV=1                                                    | 0,13351081   | 0,444724 |
| Q14697 | Neutral alpha-glucosidase AB OS=Homo sapiens OX=9606 GN=GANAB PE=1 SV=3                                             | 0,029821754  | 0,443722 |
| P53365 | Arfaptin-2 OS=Homo sapiens OX=9606 GN=ARFIP2 PE=1 SV=1                                                              | -0,096353939 | 0,443511 |
| P36578 | 60S ribosomal protein L4 OS=Homo sapiens OX=9606 GN=RPL4 PE=1 SV=5                                                  | -0,038334415 | 0,443101 |
| Q9BWH2 | FUN14 domain-containing protein 2 OS=Homo sapiens OX=9606 GN=FUNDC2 PE=1 SV=2                                       | 0,418009294  | 0,442263 |
| P46736 | Lys-63-specific deubiquitinase BRCC36 OS=Homo sapiens OX=9606 GN=BRCC3 PE=1 SV=2                                    | 0,109777085  | 0,441463 |
| P35251 | Replication factor C subunit 1 OS=Homo sapiens OX=9606 GN=RFC1 PE=1 SV=4                                            | 0,06200566   | 0,44118  |
| Q8IY51 | Peptidase M20 domain-containing protein 2 OS=Homo sapiens OX=9606 GN=PM20D2 PE=1 SV=2                               | -0,109597651 | 0,440668 |
| Q14644 | Ras GTPase-activating protein 3 OS=Homo sapiens OX=9606 GN=RASA3 PE=1 SV=3                                          | -0,184203183 | 0,440168 |
| Q9NQP4 | Prefoldin subunit 4 OS=Homo sapiens OX=9606 GN=PFN4 PE=1 SV=1                                                       | 0,183758216  | 0,439061 |
| Q96N67 | Dedicator of cytokinesis protein 7 OS=Homo sapiens OX=9606 GN=DOCK7 PE=1 SV=4                                       | 0,034963924  | 0,439003 |
| Q9NRY4 | Rho GTPase-activating protein 35 OS=Homo sapiens OX=9606 GN=ARHGAP35 PE=1 SV=3                                      | 0,183516544  | 0,43846  |

|        |                                                                                                                      |              |          |
|--------|----------------------------------------------------------------------------------------------------------------------|--------------|----------|
| Q93062 | RNA-binding protein with multiple splicing OS=Homo sapiens OX=9606 GN=RBPMS PE=1 SV=1                                | 0,140012118  | 0,437431 |
| Q53H82 | Endoribonuclease LACTB2 OS=Homo sapiens OX=9606 GN=LACTB2 PE=1 SV=2                                                  | -0,108716398 | 0,436765 |
| P30825 | High affinity cationic amino acid transporter 1 OS=Homo sapiens OX=9606 GN=SLC7A1 PE=1 SV=1                          | -0,094931158 | 0,436256 |
| Q8TC44 | POC1 centriolar protein homolog B OS=Homo sapiens OX=9606 GN=POC1B PE=1 SV=1                                         | 0,250892278  | 0,435277 |
| Q9UK61 | Protein TASOR OS=Homo sapiens OX=9606 GN=TASOR PE=1 SV=3                                                             | 0,094601619  | 0,434579 |
| Q75382 | Tripartite motif-containing protein 3 OS=Homo sapiens OX=9606 GN=TRIM3 PE=1 SV=2                                     | 0,094568923  | 0,434412 |
| Q52PR3 | CD276 antigen OS=Homo sapiens OX=9606 GN=CD276 PE=1 SV=1                                                             | 0,072555105  | 0,4343   |
| Q98ZD4 | Kinetochore protein Nuf2 OS=Homo sapiens OX=9606 GN=NUF2 PE=1 SV=2                                                   | 0,061033572  | 0,433449 |
| Q9NWS0 | PIH1 domain-containing protein 1 OS=Homo sapiens OX=9606 GN=PIH1D1 PE=1 SV=1                                         | 0,094343186  | 0,433264 |
| P45983 | Mitogen-activated protein kinase 8 OS=Homo sapiens OX=9606 GN=MAPK8 PE=1 SV=2                                        | -0,181412967 | 0,433228 |
| P62826 | GTP-binding nuclear protein Ran OS=Homo sapiens OX=9606 GN=RAN PE=1 SV=3                                             | -0,072383889 | 0,433157 |
| P54920 | Alpha-soluble NSF attachment protein OS=Homo sapiens OX=9606 GN=NAPA PE=1 SV=3                                       | -0,051807582 | 0,433035 |
| O60256 | Phosphoribosyl pyrophosphate synthase-associated protein 2 OS=Homo sapiens OX=9606 GN=PRPSAP2 PE=1 SV=1              | -0,072333914 | 0,432824 |
| P62241 | 40S ribosomal protein S8 OS=Homo sapiens OX=9606 GN=RPS8 PE=1 SV=2                                                   | -0,05172333  | 0,432247 |
| Q86UD0 | Suppressor APC domain-containing protein 2 OS=Homo sapiens OX=9606 GN=SAPCD2 PE=1 SV=2                               | 0,180978596  | 0,432148 |
| Q93IU8 | 60S ribosomal protein L36 OS=Homo sapiens OX=9606 GN=RPL36 PE=1 SV=3                                                 | -0,094100219 | 0,432023 |
| Q92791 | Endoplasmic reticulum protein SC65 OS=Homo sapiens OX=9606 GN=P3H4 PE=1 SV=1                                         | 0,180868449  | 0,431874 |
| Q13283 | Ras GTPase-activating protein-binding protein 1 OS=Homo sapiens OX=9606 GN=G3BP1 PE=1 SV=1                           | 0,041434753  | 0,43184  |
| P19838 | Nuclear factor NF-kappa-B p105 subunit OS=Homo sapiens OX=9606 GN=NFKB1 PE=1 SV=2                                    | -0,077603673 | 0,431349 |
| O94913 | Pre-mRNA cleavage complex 2 protein Pcf11 OS=Homo sapiens OX=9606 GN=PCF11 PE=1 SV=3                                 | -0,180116577 | 0,430004 |
| Q96SK2 | Transmembrane protein 209 OS=Homo sapiens OX=9606 GN=TMEM209 PE=1 SV=2                                               | 0,041325915  | 0,42996  |
| Q9NVU1 | UDP-glucose:glycoprotein glucosyltransferase 2 OS=Homo sapiens OX=9606 GN=UGGT2 PE=1 SV=4                            | -0,093573096 | 0,42935  |
| Q9P2R3 | Rabankyrin-5 OS=Homo sapiens OX=9606 GN=ANKFY1 PE=1 SV=2                                                             | 0,044288312  | 0,429294 |
| Q8IUD2 | ELKS/Rab6-interacting/CAST family member 1 OS=Homo sapiens OX=9606 GN=ERC1 PE=1 SV=1                                 | -0,084151265 | 0,428805 |
| P33552 | Cyclin-dependent kinases regulatory subunit 2 OS=Homo sapiens OX=9606 GN=CKS2 PE=1 SV=1                              | 0,106812325  | 0,428349 |
| Q96K37 | Solute carrier family 35 member E1 OS=Homo sapiens OX=9606 GN=SLC35E1 PE=1 SV=2                                      | 0,12900518   | 0,428346 |
| P09132 | Signal recognition particle 19 kDa protein OS=Homo sapiens OX=9606 GN=SRP19 PE=1 SV=3                                | 0,106800995  | 0,428299 |
| P15927 | Replication protein A 32 kDa subunit OS=Homo sapiens OX=9606 GN=RPA2 PE=1 SV=1                                       | -0,084030077 | 0,428119 |
| O15116 | U6 snRNA-associated Sm-like protein LSM1 OS=Homo sapiens OX=9606 GN=LSM1 PE=1 SV=1                                   | 0,093157843  | 0,427242 |
| Q9NWU5 | 39S ribosomal protein L22, mitochondrial OS=Homo sapiens OX=9606 GN=MRPL22 PE=1 SV=1                                 | 0,106530271  | 0,427104 |
| Q86UP2 | Kinectin OS=Homo sapiens OX=9606 GN=KTN1 PE=1 SV=1                                                                   | 0,04295827   | 0,426722 |
| Q8WWT3 | Conserved oligomeric Golgi complex subunit 1 OS=Homo sapiens OX=9606 GN=COG1 PE=1 SV=1                               | -0,106423296 | 0,426632 |
| P25787 | Proteasome subunit alpha type-2 OS=Homo sapiens OX=9606 GN=PSMA2 PE=1 SV=2                                           | 0,071339356  | 0,426197 |
| Q9BSK0 | MARVEL domain-containing protein 1 OS=Homo sapiens OX=9606 GN=MARVELD1 PE=1 SV=1                                     | -0,17842929  | 0,425807 |
| Q9BRX5 | DNA replication complex GINS protein PSF3 OS=Homo sapiens OX=9606 GN=GINS3 PE=1 SV=1                                 | -0,178411063 | 0,425762 |
| O14929 | Histone acetyltransferase type B catalytic subunit OS=Homo sapiens OX=9606 GN=HAT1 PE=1 SV=1                         | 0,060028467  | 0,425482 |
| P54277 | PMS1 protein homolog 1 OS=Homo sapiens OX=9606 GN=PMS1 PE=1 SV=1                                                     | -0,155615713 | 0,425336 |
| Q9UJ41 | Rab5 GDP/GTP exchange factor OS=Homo sapiens OX=9606 GN=RABGEF1 PE=1 SV=3                                            | -0,092762446 | 0,425236 |
| P61019 | Ras-related protein Rab-2A OS=Homo sapiens OX=9606 GN=RAB2A PE=1 SV=1                                                | 0,059898681  | 0,424455 |
| Q96GX2 | Ataxin-7-like protein 3B OS=Homo sapiens OX=9606 GN=ATXN7L3B PE=1 SV=2                                               | 0,177531596  | 0,423575 |
| Q92574 | Hamartin OS=Homo sapiens OX=9606 GN=TSC1 PE=1 SV=2                                                                   | -0,127594044 | 0,423254 |
| Q9BV68 | E3 ubiquitin-protein ligase RNF126 OS=Homo sapiens OX=9606 GN=RNF126 PE=1 SV=2                                       | -0,177300915 | 0,423001 |
| Q9UMR2 | #N/D                                                                                                                 | 0,062738155  | 0,422367 |
| Q9H3K2 | Growth hormone-inducible transmembrane protein OS=Homo sapiens OX=9606 GN=GHTM PE=1 SV=2                             | -0,105294256 | 0,421656 |
| Q07000 | HLA class I histocompatibility antigen, Cw-15 alpha chain OS=Homo sapiens OX=9606 GN=HLA-C PE=1 SV=1                 | 0,127012425  | 0,421158 |
| P52735 | Guanine nucleotide exchange factor VAV2 OS=Homo sapiens OX=9606 GN=VAV2 PE=1 SV=2                                    | 0,062486435  | 0,420478 |
| Q9UBQ5 | Eukaryotic translation initiation factor 3 subunit K OS=Homo sapiens OX=9606 GN=EIF3K PE=1 SV=1                      | -0,070430056 | 0,420155 |
| O75607 | Nucleoplasm-3 OS=Homo sapiens OX=9606 GN=NPM3 PE=1 SV=3                                                              | 0,126657433  | 0,419878 |
| O00217 | NADH dehydrogenase [ubiquinone] iron-sulfur protein 8, mitochondrial OS=Homo sapiens OX=9606 GN=NDUFS8 PE=1 SV=1     | 0,091643825  | 0,41957  |
| Q96E15 | Dehydration elongation factor A protein-like 4 OS=Homo sapiens OX=9606 GN=TECAL4 PE=1 SV=2                           | -0,175656615 | 0,418912 |
| O15173 | Membrane-associated progesterone receptor component 2 OS=Homo sapiens OX=9606 GN=PGRMC2 PE=1 SV=1                    | 0,075565101  | 0,418768 |
| Q92624 | Amyloid protein-binding protein 2 OS=Homo sapiens OX=9606 GN=APBP2 PE=1 SV=2                                         | -0,175548394 | 0,418642 |
| P62330 | ADP-ribosylation factor 6 OS=Homo sapiens OX=9606 GN=ARF6 PE=1 SV=2                                                  | -0,091457796 | 0,418628 |
| P62195 | 26S proteasome regulatory subunit 8 OS=Homo sapiens OX=9606 GN=PSMC5 PE=1 SV=1                                       | -0,041219574 | 0,418496 |
| Q8NSM9 | Protein jagunal homolog 1 OS=Homo sapiens OX=9606 GN=JAGN1 PE=1 SV=1                                                 | 0,17538735   | 0,418242 |
| O43715 | TP53-regulated inhibitor of apoptosis 1 OS=Homo sapiens OX=9606 GN=TRAIAP1 PE=1 SV=1                                 | -0,175204122 | 0,417786 |
| Q9BVG4 | Protein PBDC1 OS=Homo sapiens OX=9606 GN=PBDC1 PE=1 SV=1                                                             | 0,075342477  | 0,417399 |
| P50991 | T-complex protein 1 subunit delta OS=Homo sapiens OX=9606 GN=CCT4 PE=1 SV=4                                          | 0,031092302  | 0,417099 |
| P31751 | RAC-beta serine/threonine-protein kinase OS=Homo sapiens OX=9606 GN=AKT2 PE=1 SV=2                                   | -0,091135437 | 0,416998 |
| Q9Y285 | Phenylalanine-tRNA ligase alpha subunit OS=Homo sapiens OX=9606 GN=FARSA PE=1 SV=3                                   | -0,045458821 | 0,415914 |
| Q9NS86 | LanC-like protein 2 OS=Homo sapiens OX=9606 GN=LANCL2 PE=1 SV=1                                                      | -0,081836252 | 0,415741 |
| Q8N1W1 | Rho guanine nucleotide exchange factor 28 OS=Homo sapiens OX=9606 GN=ARHGEF28 PE=1 SV=3                              | 0,1743471    | 0,415655 |
| O95183 | Vesicle-associated membrane protein 5 OS=Homo sapiens OX=9606 GN=VAMP5 PE=1 SV=1                                     | -0,103929897 | 0,415654 |
| P49459 | Ubiquitin-conjugating enzyme E2 A OS=Homo sapiens OX=9606 GN=UBE2A PE=1 SV=2                                         | 0,174145583  | 0,415152 |
| Q6ZUJ8 | Phosphoinositide 3-kinase adapter protein 1 OS=Homo sapiens OX=9606 GN=PIK3AP1 PE=1 SV=2                             | 0,040802575  | 0,415077 |
| P31150 | Rab GDP dissociation inhibitor alpha OS=Homo sapiens OX=9606 GN=GD1 PE=1 SV=2                                        | 0,034849637  | 0,414231 |
| Q99594 | Transcriptional enhancer factor TEF-5 OS=Homo sapiens OX=9606 GN=TEAD3 PE=1 SV=2                                     | -0,118657051 | 0,414077 |
| Q9Y3B2 | Exosome complex component CSL4 OS=Homo sapiens OX=9606 GN=EXOSC1 PE=1 SV=1                                           | -0,103418391 | 0,413408 |
| Q9UNK0 | Syntaxin-8 OS=Homo sapiens OX=9606 GN=STX8 PE=1 SV=2                                                                 | -0,173181507 | 0,412756 |
| Q9NX24 | H/ACA ribonucleoprotein complex subunit 2 OS=Homo sapiens OX=9606 GN=NHP2 PE=1 SV=1                                  | -0,103016649 | 0,411644 |
| Q92609 | TBC1 domain family member 5 OS=Homo sapiens OX=9606 GN=TBC1D5 PE=1 SV=1                                              | 0,049504619  | 0,411582 |
| Q9NW68 | BSD domain-containing protein 1 OS=Homo sapiens OX=9606 GN=BSDC1 PE=1 SV=1                                           | 0,172868215  | 0,411525 |
| Q96EQ0 | Small glutamine-rich tetratricopeptide repeat-containing protein beta OS=Homo sapiens OX=9606 GN=SGTB PE=1 SV=1      | 0,102972397  | 0,411145 |
| P50579 | Methionine aminopeptidase 2 OS=Homo sapiens OX=9606 GN=METAP2 PE=1 SV=1                                              | 0,04631374   | 0,410856 |
| P21399 | Cytoplasmic aconitase hydratase OS=Homo sapiens OX=9606 GN=ACO1 PE=1 SV=3                                            | 0,041444221  | 0,409945 |
| Q92643 | GPI-anchor transamidase OS=Homo sapiens OX=9606 GN=PIGK PE=1 SV=2                                                    | 0,102367507  | 0,408797 |
| P39687 | Acidic leucine-rich nuclear phosphoprotein 32 family member A OS=Homo sapiens OX=9606 GN=ANP32A PE=1 SV=1            | 0,089463718  | 0,408562 |
| P08133 | Annexin A6 OS=Homo sapiens OX=9606 GN=ANXA6 PE=1 SV=3                                                                | -0,027077562 | 0,407938 |
| P36543 | V-type proton ATPase subunit E 1 OS=Homo sapiens OX=9606 GN=ATP6V1E1 PE=1 SV=1                                       | 0,064206237  | 0,406961 |
| Q96DM3 | Regulator of MON1-CCZ1 complex OS=Homo sapiens OX=9606 GN=RM1C1 PE=1 SV=2                                            | 0,170813326  | 0,406867 |
| Q15904 | V-type proton ATPase subunit S1 OS=Homo sapiens OX=9606 GN=ATP6A1 PE=1 SV=2                                          | 0,073575632  | 0,406554 |
| Q9NXF1 | Testis-expressed protein 10 OS=Homo sapiens OX=9606 GN=TEX10 PE=1 SV=2                                               | -0,047316858 | 0,406287 |
| Q96NTO | Coiled-coil domain-containing protein 115 OS=Homo sapiens OX=9606 GN=CCDC115 PE=1 SV=1                               | -0,028114535 | 0,405076 |
| O14965 | Aurora kinase A OS=Homo sapiens OX=9606 GN=AURKA PE=1 SV=2                                                           | 0,170043928  | 0,404954 |
| Q9HOW9 | Ester hydrolase C11orf54 OS=Homo sapiens OX=9606 GN=C11orf54 PE=1 SV=1                                               | 0,122426502  | 0,404669 |
| P49354 | Protein farnesyltransferase/geranylgeranyltransferase type-1 subunit alpha OS=Homo sapiens OX=9606 GN=FNTA PE=1 SV=1 | 0,06803708   | 0,404327 |
| Q15006 | ER membrane protein complex subunit 2 OS=Homo sapiens OX=9606 GN=EMC2 PE=1 SV=1                                      | 0,169425002  | 0,403416 |
| P23458 | Tyrosine-protein kinase JAK1 OS=Homo sapiens OX=9606 GN=JAK1 PE=1 SV=2                                               | -0,073030001 | 0,403215 |
| Q8N3E9 | 1-phosphatidylinositol 4,5-bisphosphate phosphodiesterase delta-3 OS=Homo sapiens OX=9606 GN=PLCD3 PE=1 SV=3         | -0,060134649 | 0,402907 |
| Q53LP3 | Ankyrin repeat domain-containing protein SOWAHC OS=Homo sapiens OX=9606 GN=SOWAHC PE=1 SV=1                          | 0,06546536   | 0,402707 |
| Q9Y6N5 | Sulfide:quinone oxidoreductase, mitochondrial OS=Homo sapiens OX=9606 GN=SQOR PE=1 SV=1                              | -0,121767483 | 0,402305 |

|        |                                                                                                              |              |          |
|--------|--------------------------------------------------------------------------------------------------------------|--------------|----------|
| Q9H2G2 | STE20-like serine/threonine-protein kinase OS=Homo sapiens OX=9606 GN=SLK PE=1 SV=1                          | -0,033929017 | 0,402033 |
| P57721 | Poly(rC)-binding protein 3 OS=Homo sapiens OX=9606 GN=PCBP3 PE=2 SV=2                                        | 0,121421008  | 0,401063 |
| P84103 | Serine/arginine-rich splicing factor 3 OS=Homo sapiens OX=9606 GN=SRSF3 PE=1 SV=1                            | 0,072444262  | 0,399636 |
| Q96Q11 | CCA tRNA nucleotidyltransferase 1, mitochondrial OS=Homo sapiens OX=9606 GN=TRNT1 PE=1 SV=2                  | 0,078840736  | 0,398939 |
| Q96JD6 | 1,5-anhydro-D-fructose reductase OS=Homo sapiens OX=9606 GN=AKR1E2 PE=1 SV=2                                 | 0,167521508  | 0,398684 |
| Q9NRM7 | Serine/threonine-protein kinase LATS2 OS=Homo sapiens OX=9606 GN=LATS2 PE=1 SV=2                             | -0,124222499 | 0,398394 |
| O94842 | TOX high mobility group box family member 4 OS=Homo sapiens OX=9606 GN=TOX4 PE=1 SV=1                        | 0,052542609  | 0,398186 |
| P51828 | Adenylate cyclase type 7 OS=Homo sapiens OX=9606 GN=ADCY7 PE=1 SV=1                                          | 0,298962158  | 0,397866 |
| Q96JG6 | Syndetin OS=Homo sapiens OX=9606 GN=VPS50 PE=1 SV=3                                                          | -0,07861393  | 0,397671 |
| O43502 | DNA repair protein RAD51 homolog 3 OS=Homo sapiens OX=9606 GN=RAD51C PE=1 SV=1                               | -0,166933059 | 0,397221 |
| Q8N6M0 | Deubiquitinase OTUD6B OS=Homo sapiens OX=9606 GN=OTUD6B PE=1 SV=1                                            | -0,166697787 | 0,396636 |
| Q98PW8 | Protein NipSnap homolog 1 OS=Homo sapiens OX=9606 GN=NIPSNAP1 PE=1 SV=1                                      | -0,059285466 | 0,396596 |
| P12955 | Xaa-Pro dipeptidase OS=Homo sapiens OX=9606 GN=PEPD PE=1 SV=3                                                | 0,049571302  | 0,396005 |
| Q92614 | Unconventional myosin-XVIIIa OS=Homo sapiens OX=9606 GN=MYO18A PE=1 SV=3                                     | 0,035949381  | 0,395273 |
| Q99714 | 3-hydroxyacyl-CoA dehydrogenase type-2 OS=Homo sapiens OX=9606 GN=HSD17B10 PE=1 SV=3                         | -0,049378769 | 0,394296 |
| O95721 | Synaptosomal-associated protein 29 OS=Homo sapiens OX=9606 GN=SNAP29 PE=1 SV=1                               | -0,077969458 | 0,394073 |
| Q9NZM3 | Intersectin-2 OS=Homo sapiens OX=9606 GN=ITSN2 PE=1 SV=3                                                     | -0,098891282 | 0,3936   |
| P31930 | Cytochrome b-c1 complex subunit 1, mitochondrial OS=Homo sapiens OX=9606 GN=UQCRC1 PE=1 SV=3                 | -0,047551523 | 0,39355  |
| Q715Y5 | Mediator of RNA polymerase II transcription subunit 25 OS=Homo sapiens OX=9606 GN=MED25 PE=1 SV=2            | 0,119201208  | 0,393118 |
| Q8TAA9 | Vang-like protein 1 OS=Homo sapiens OX=9606 GN=VANGL1 PE=1 SV=1                                              | -0,21366365  | 0,393038 |
| Q16181 | Septin-7 OS=Homo sapiens OX=9606 GN=SEPTIN7 PE=1 SV=2                                                        | -0,041992099 | 0,392767 |
| Q6GMV2 | SET and MYND domain-containing protein 5 OS=Homo sapiens OX=9606 GN=SMYD5 PE=1 SV=2                          | -0,119009667 | 0,392433 |
| Q5SW96 | Low density lipoprotein receptor adapter protein 1 OS=Homo sapiens OX=9606 GN=LDLRAP1 PE=1 SV=3              | 0,164837369  | 0,392012 |
| Q6F1I3 | Histone H2A type 2-A OS=Homo sapiens OX=9606 GN=HIST2H2AA3 PE=1 SV=3                                         | 0,118885957  | 0,391991 |
| O94864 | STAGA complex 65 subunit gamma OS=Homo sapiens OX=9606 GN=SUPT7L PE=1 SV=1                                   | -0,221708461 | 0,391849 |
| P62136 | Serine/threonine-protein phosphatase PP1-alpha catalytic subunit OS=Homo sapiens OX=9606 GN=PPP1CA PE=1 SV=1 | -0,043031145 | 0,391249 |
| P21953 | 2-oxoisovalerate dehydrogenase subunit beta, mitochondrial OS=Homo sapiens OX=9606 GN=BCKDHB PE=1 SV=2       | 0,164407908  | 0,390945 |
| Q9Y3F4 | Serine-threonine kinase receptor-associated protein OS=Homo sapiens OX=9606 GN=STRAP PE=1 SV=1               | -0,047253661 | 0,390813 |
| Q9P2J3 | Kelch-like protein 9 OS=Homo sapiens OX=9606 GN=KLHL9 PE=1 SV=2                                              | -0,16435328  | 0,390809 |
| Q8WVM8 | Sec1 family domain-containing protein 1 OS=Homo sapiens OX=9606 GN=SCFD1 PE=1 SV=4                           | 0,061806466  | 0,390127 |
| Q9BP06 | Dihydropyrimidinase-related protein 5 OS=Homo sapiens OX=9606 GN=DPYSL5 PE=1 SV=1                            | -0,058404145 | 0,390064 |
| Q13310 | Polyadenylate-binding protein 4 OS=Homo sapiens OX=9606 GN=PABPC4 PE=1 SV=1                                  | -0,039618664 | 0,389888 |
| Q9BRJ7 | Tudor-interacting repair regulator protein OS=Homo sapiens OX=9606 GN=NUDT16L1 PE=1 SV=1                     | -0,097674159 | 0,388298 |
| P45985 | Dual specificity mitogen-activated protein kinase kinase 4 OS=Homo sapiens OX=9606 GN=MAP2K4 PE=1 SV=1       | -0,076801894 | 0,387569 |
| P38117 | Electron transfer flavoprotein subunit beta OS=Homo sapiens OX=9606 GN=ETFBE PE=1 SV=3                       | 0,055166438  | 0,387333 |
| Q8TE02 | Elongator complex protein 5 OS=Homo sapiens OX=9606 GN=ELP5 PE=1 SV=2                                        | -0,162906701 | 0,387215 |
| Q9UI12 | V-type proton ATPase subunit H OS=Homo sapiens OX=9606 GN=ATP6V1H PE=1 SV=1                                  | -0,046861353 | 0,387213 |
| P29992 | Guanine nucleotide-binding protein subunit alpha-11 OS=Homo sapiens OX=9606 GN=GNA11 PE=1 SV=2               | -0,055047063 | 0,386405 |
| Q8Y1B8 | ATP-dependent RNA helicase SUPV3L1, mitochondrial OS=Homo sapiens OX=9606 GN=SUPV3L1 PE=1 SV=1               | -0,162406756 | 0,385972 |
| O15372 | Eukaryotic translation initiation factor 3 subunit H OS=Homo sapiens OX=9606 GN=EIF3H PE=1 SV=1              | -0,048365836 | 0,385533 |
| Q92626 | Peroxidase homolog OS=Homo sapiens OX=9606 GN=PXDN PE=1 SV=2                                                 | -0,076369657 | 0,385165 |
| Q16763 | Ubiquitin-conjugating enzyme E2 S OS=Homo sapiens OX=9606 GN=UBE2S PE=1 SV=2                                 | 0,076365714  | 0,385143 |
| O95273 | Cyclin-D1-binding protein 1 OS=Homo sapiens OX=9606 GN=CCNDBP1 PE=1 SV=2                                     | 0,116927929  | 0,385    |
| O75436 | Vacuolar protein sorting-associated protein 26A OS=Homo sapiens OX=9606 GN=VPS26A PE=1 SV=2                  | 0,057716794  | 0,384984 |
| Q9BWD1 | Acetyl-CoA acetyltransferase, cytosolic OS=Homo sapiens OX=9606 GN=ACAT2 PE=1 SV=2                           | -0,052355921 | 0,384638 |
| Q96RQ1 | Endoplasmic reticulum-Golgi intermediate compartment protein 2 OS=Homo sapiens OX=9606 GN=ERGIC2 PE=1 SV=2   | -0,161733378 | 0,3843   |
| Q9ULF5 | Zinc transporter ZIP10 OS=Homo sapiens OX=9606 GN=SLC39A10 PE=1 SV=2                                         | -0,161560227 | 0,383869 |
| O14907 | Tax1-binding protein 3 OS=Homo sapiens OX=9606 GN=TAX1BP3 PE=1 SV=2                                          | -0,116596026 | 0,383816 |
| O15061 | Synemin OS=Homo sapiens OX=9606 GN=SYNM PE=1 SV=2                                                            | -0,161408263 | 0,383492 |
| Q726B7 | SLIT-ROBO Rho GTPase-activating protein 1 OS=Homo sapiens OX=9606 GN=SRGAP1 PE=1 SV=1                        | 0,161398753  | 0,383468 |
| A6ND36 | Protein FAM83G OS=Homo sapiens OX=9606 GN=FAM83G PE=1 SV=2                                                   | -0,027842108 | 0,383096 |
| Q01105 | Protein SET OS=Homo sapiens OX=9606 GN=SET PE=1 SV=3                                                         | -0,054587225 | 0,382832 |
| Q9NUJ1 | Mycophenolic acid acyl-glucuronide esterase, mitochondrial OS=Homo sapiens OX=9606 GN=ABHD10 PE=1 SV=1       | -0,049961779 | 0,382633 |
| O60664 | Perilipin-3 OS=Homo sapiens OX=9606 GN=PLIN3 PE=1 SV=3                                                       | -0,036332022 | 0,382148 |
| P61457 | Pterin-4-alpha-carbinolamine dehydratase OS=Homo sapiens OX=9606 GN=PCBD1 PE=1 SV=2                          | 0,084112752  | 0,381742 |
| Q6UX71 | Plexin domain-containing protein 2 OS=Homo sapiens OX=9606 GN=PLXDC2 PE=1 SV=1                               | 0,160699172  | 0,38173  |
| Q8WVV9 | Heterogeneous nuclear ribonucleoprotein L-like OS=Homo sapiens OX=9606 GN=HNRNPLL PE=1 SV=1                  | 0,04784611   | 0,380744 |
| Q9UQR1 | Zinc finger protein 148 OS=Homo sapiens OX=9606 GN=ZNF148 PE=1 SV=2                                          | -0,075485567 | 0,380257 |
| Q5U5X0 | Complex III assembly factor LYRM7 OS=Homo sapiens OX=9606 GN=LYRM7 PE=1 SV=1                                 | -0,159961102 | 0,379897 |
| Q9UBF2 | Coatamer subunit gamma-2 OS=Homo sapiens OX=9606 GN=COPG2 PE=1 SV=1                                          | -0,095687462 | 0,379667 |
| O75179 | Ankyrin repeat domain-containing protein 17 OS=Homo sapiens OX=9606 GN=ANKRD17 PE=1 SV=3                     | 0,095671686  | 0,379599 |
| Q13242 | Serine/arginine-rich splicing factor 9 OS=Homo sapiens OX=9606 GN=SRSF9 PE=1 SV=1                            | -0,05696613  | 0,379448 |
| Q53G59 | U4/U6.U5 tri-snRNP-associated protein 2 OS=Homo sapiens OX=9606 GN=USP39 PE=1 SV=2                           | 0,043084148  | 0,379132 |
| P62072 | Mitochondrial import inner membrane translocase subunit Tim10 OS=Homo sapiens OX=9606 GN=TIMM10 PE=1 SV=1    | -0,159526073 | 0,378817 |
| O43318 | Mitogen-activated protein kinase kinase kinase 7 OS=Homo sapiens OX=9606 GN=MAP3K7 PE=1 SV=1                 | -0,159057586 | 0,377653 |
| O75083 | WD repeat-containing protein 1 OS=Homo sapiens OX=9606 GN=WDR1 PE=1 SV=4                                     | 0,034502862  | 0,377644 |
| Q8IWS0 | PHD finger protein 6 OS=Homo sapiens OX=9606 GN=PHF6 PE=1 SV=1                                               | -0,158997095 | 0,377503 |
| Q14653 | Interferon regulatory factor 3 OS=Homo sapiens OX=9606 GN=IRF3 PE=1 SV=1                                     | 0,158855305  | 0,377151 |
| Q13535 | Serine/threonine-protein kinase ATR OS=Homo sapiens OX=9606 GN=ATR PE=1 SV=3                                 | -0,095047051 | 0,376891 |
| P60900 | Proteasome subunit alpha type-6 OS=Homo sapiens OX=9606 GN=PSMA6 PE=1 SV=1                                   | -0,051373744 | 0,376659 |
| P33121 | Long-chain-fatty-acid--CoA ligase 1 OS=Homo sapiens OX=9606 GN=ACSL1 PE=1 SV=1                               | 0,059862083  | 0,376578 |
| P16403 | Histone H1.2 OS=Homo sapiens OX=9606 GN=HIST1H1C PE=1 SV=2                                                   | -0,158595986 | 0,376507 |
| P49366 | Deoxyhypusine synthase OS=Homo sapiens OX=9606 GN=DHPS PE=1 SV=1                                             | -0,05981992  | 0,376285 |
| Q5R314 | Tetratricopeptide repeat protein 38 OS=Homo sapiens OX=9606 GN=TRC38 PE=1 SV=1                               | 0,158482881  | 0,376226 |
| Q4G176 | Acyl-CoA synthetase family member 3, mitochondrial OS=Homo sapiens OX=9606 GN=ACSF3 PE=1 SV=3                | -0,074637598 | 0,375558 |
| Q96AB6 | Protein N-terminal asparagine amidohydrolase OS=Homo sapiens OX=9606 GN=NTAN1 PE=1 SV=3                      | -0,158200358 | 0,375525 |
| Q10567 | AP-1 complex subunit beta-1 OS=Homo sapiens OX=9606 GN=AP1B1 PE=1 SV=2                                       | 0,0414044    | 0,374877 |
| P31321 | cAMP-dependent protein kinase type I-beta regulatory subunit OS=Homo sapiens OX=9606 GN=PRKAR1B PE=1 SV=4    | -0,15793009  | 0,374853 |
| P08473 | Neprilysin OS=Homo sapiens OX=9606 GN=MME PE=1 SV=2                                                          | -0,04898751  | 0,374382 |
| Q0VFP6 | Cingulin-like protein 1 OS=Homo sapiens OX=9606 GN=CGNL1 PE=1 SV=2                                           | 0,055182512  | 0,374372 |
| Q9Y4D8 | Probable E3 ubiquitin-protein ligase HECTD4 OS=Homo sapiens OX=9606 GN=HECTD4 PE=1 SV=5                      | 0,157415844  | 0,373577 |
| Q13085 | Acetyl-CoA carboxylase 1 OS=Homo sapiens OX=9606 GN=ACACA PE=1 SV=2                                          | 0,021776506  | 0,372979 |
| O15160 | DNA-directed RNA polymerases I and III subunit RPAC1 OS=Homo sapiens OX=9606 GN=POLR1C PE=1 SV=1             | 0,063204947  | 0,372693 |
| O15111 | Inhibitor of nuclear factor kappa-B kinase subunit alpha OS=Homo sapiens OX=9606 GN=CHUK PE=1 SV=2           | -0,074105588 | 0,372615 |
| P05198 | Eukaryotic translation initiation factor 2 subunit 1 OS=Homo sapiens OX=9606 GN=EIF2S1 PE=1 SV=3             | -0,038992061 | 0,372533 |
| P35579 | Myosin-9 OS=Homo sapiens OX=9606 GN=MYH9 PE=1 SV=4                                                           | 0,015961719  | 0,371577 |
| Q9C0B1 | Alpha-ketoglutarate-dependent dioxygenase FTO OS=Homo sapiens OX=9606 GN=FTO PE=1 SV=3                       | 0,063005693  | 0,371398 |
| P07919 | Cytochrome b-c1 complex subunit 6, mitochondrial OS=Homo sapiens OX=9606 GN=UQCRC6 PE=1 SV=2                 | 0,156519731  | 0,371352 |
| P56134 | ATP synthase subunit f, mitochondrial OS=Homo sapiens OX=9606 GN=ATP5MF PE=1 SV=3                            | -0,113080992 | 0,371336 |
| P60033 | CD81 antigen OS=Homo sapiens OX=9606 GN=CD81 PE=1 SV=1                                                       | 0,113054093  | 0,371211 |
| Q5XP14 | E3 ubiquitin-protein ligase RNF123 OS=Homo sapiens OX=9606 GN=RNF123 PE=1 SV=1                               | -0,156456451 | 0,371195 |

|        |                                                                                                                   |              |          |
|--------|-------------------------------------------------------------------------------------------------------------------|--------------|----------|
| Q9NVA2 | Septin-11 OS=Homo sapiens OX=9606 GN=SEPTIN11 PE=1 SV=3                                                           | 0,062927922  | 0,370893 |
| Q8IURO | Trafficking protein particle complex subunit 5 OS=Homo sapiens OX=9606 GN=TRAPPC5 PE=1 SV=1                       | -0,081831176 | 0,370393 |
| Q9UJUV | Probable ATP-dependent RNA helicase DDX41 OS=Homo sapiens OX=9606 GN=DDX41 PE=1 SV=2                              | -0,112822766 | 0,37039  |
| A5D8V6 | Vacuolar protein sorting-associated protein 37C OS=Homo sapiens OX=9606 GN=VPS37C PE=1 SV=2                       | 0,224942921  | 0,36978  |
| Q14699 | Raftlin OS=Homo sapiens OX=9606 GN=RFTN1 PE=1 SV=4                                                                | -0,055613446 | 0,369508 |
| Q96CP2 | FLYWCH family member 2 OS=Homo sapiens OX=9606 GN=FLYWCH2 PE=1 SV=1                                               | 0,081642056  | 0,369455 |
| Q9BR76 | Coronin-1B OS=Homo sapiens OX=9606 GN=CORO1B PE=1 SV=1                                                            | 0,043419102  | 0,369455 |
| P46940 | Ras GTPase-activating-like protein IQGAP1 OS=Homo sapiens OX=9606 GN=IQGAP1 PE=1 SV=1                             | 0,019866471  | 0,368592 |
| Q9Y3C4 | EKC/KEOPS complex subunit TPRKB OS=Homo sapiens OX=9606 GN=TPRKB PE=1 SV=1                                        | 0,155331985  | 0,368404 |
| Q2TAY7 | WD40 repeat-containing protein SMU1 OS=Homo sapiens OX=9606 GN=SMU1 PE=1 SV=2                                     | 0,046400606  | 0,368099 |
| Q15796 | Mothers against decapentaplegic homolog 2 OS=Homo sapiens OX=9606 GN=SMAD2 PE=1 SV=1                              | 0,081338953  | 0,367952 |
| P55199 | RNA polymerase II elongation factor ELL OS=Homo sapiens OX=9606 GN=ELL PE=1 SV=1                                  | -0,155062327 | 0,367735 |
| Q15654 | Thyroid receptor-interacting protein 6 OS=Homo sapiens OX=9606 GN=TRIP6 PE=1 SV=3                                 | -0,043161637 | 0,366896 |
| P25098 | Beta-adrenergic receptor kinase 1 OS=Homo sapiens OX=9606 GN=GRK2 PE=1 SV=2                                       | 0,092722642  | 0,366837 |
| Q66K74 | Microtubule-associated protein 1S OS=Homo sapiens OX=9606 GN=MAP1S PE=1 SV=2                                      | 0,037471786  | 0,366539 |
| O14727 | Apoptotic protease-activating factor 1 OS=Homo sapiens OX=9606 GN=APAF1 PE=1 SV=2                                 | 0,111726835  | 0,366501 |
| P13807 | Glycogen [starch] synthase, muscle OS=Homo sapiens OX=9606 GN=GYS1 PE=1 SV=2                                      | -0,066967527 | 0,366433 |
| Q9NVR0 | Kelch-like protein 11 OS=Homo sapiens OX=9606 GN=KLHL11 PE=1 SV=1                                                 | -0,154473785 | 0,366274 |
| P54727 | UV excision repair protein RAD23 homolog B OS=Homo sapiens OX=9606 GN=RAD23B PE=1 SV=1                            | -0,052419286 | 0,366065 |
| Q96DZ1 | Endoplasmic reticulum lectin 1 OS=Homo sapiens OX=9606 GN=ERLEC1 PE=1 SV=1                                        | -0,153866643 | 0,364767 |
| P42765 | 3-ketoacyl-CoA thiolase, mitochondrial OS=Homo sapiens OX=9606 GN=ACAA2 PE=1 SV=2                                 | -0,044397066 | 0,364739 |
| P09417 | Dihydropteridine reductase OS=Homo sapiens OX=9606 GN=QDPR PE=1 SV=2                                              | -0,080620315 | 0,364392 |
| P50914 | 60S ribosomal protein L14 OS=Homo sapiens OX=9606 GN=RPL14 PE=1 SV=4                                              | -0,09210754  | 0,364184 |
| Q9UK41 | Vacuolar protein sorting-associated protein 28 homolog OS=Homo sapiens OX=9606 GN=VPS28 PE=1 SV=1                 | -0,058067158 | 0,364144 |
| Q12824 | SWI/SNF-related matrix-associated actin-dependent regulator of chromatin subfamily B member 1 OS=Homo sapiens OX= | 0,110996246  | 0,363991 |
| Q15526 | Surfeit locus protein 1 OS=Homo sapiens OX=9606 GN=SURF1 PE=1 SV=1                                                | 0,153473336  | 0,363792 |
| Q96RD7 | Pannexin-1 OS=Homo sapiens OX=9606 GN=PANX1 PE=1 SV=4                                                             | 0,153313877  | 0,363396 |
| P62253 | Ubiquitin-conjugating enzyme E2 G1 OS=Homo sapiens OX=9606 GN=UBE2G1 PE=1 SV=3                                    | -0,072389203 | 0,363145 |
| P35270 | Sepiapterin reductase OS=Homo sapiens OX=9606 GN=SPR PE=1 SV=1                                                    | 0,049678255  | 0,362952 |
| Q9BXU4 | Complement C1q tumor necrosis factor-related protein 3 OS=Homo sapiens OX=9606 GN=C1QTNF3 PE=1 SV=1               | 0,378320526  | 0,362823 |
| Q9C091 | GREB1-like protein OS=Homo sapiens OX=9606 GN=GREB1L PE=1 SV=2                                                    | 0,152873984  | 0,362205 |
| Q15386 | Ubiquitin-protein ligase E3C OS=Homo sapiens OX=9606 GN=UBE3C PE=1 SV=3                                           | 0,072058237  | 0,361323 |
| P49356 | Protein farnesyltransferase subunit beta OS=Homo sapiens OX=9606 GN=FNTB PE=1 SV=1                                | 0,152457423  | 0,361271 |
| P84022 | Mothers against decapentaplegic homolog 3 OS=Homo sapiens OX=9606 GN=SMAD3 PE=1 SV=1                              | -0,111182835 | 0,359777 |
| P05556 | Integrin beta-1 OS=Homo sapiens OX=9606 GN=ITGB1 PE=1 SV=2                                                        | -0,030171435 | 0,359536 |
| P36405 | ADP-ribosylation factor-like protein 3 OS=Homo sapiens OX=9606 GN=ARL3 PE=1 SV=2                                  | -0,057280937 | 0,358719 |
| Q9BXY0 | Protein MAK16 homolog OS=Homo sapiens OX=9606 GN=MAK16 PE=1 SV=2                                                  | 0,109530068  | 0,358719 |
| O15446 | DNA-directed RNA polymerase I subunit RPA34 OS=Homo sapiens OX=9606 GN=CD3EAP PE=1 SV=1                           | 0,151145208  | 0,358017 |
| Q5TFE4 | 5'-nucleotidase domain-containing protein 1 OS=Homo sapiens OX=9606 GN=NTSDC1 PE=1 SV=1                           | 0,079180524  | 0,357275 |
| Q05823 | 2-5A dependent ribonuclease OS=Homo sapiens OX=9606 GN=RNASE1 PE=1 SV=2                                           | -0,108890924 | 0,356458 |
| Q9GZ53 | WD repeat-containing protein 61 OS=Homo sapiens OX=9606 GN=WDR61 PE=1 SV=1                                        | 0,056891876  | 0,35604  |
| O95168 | NADH dehydrogenase [ubiquinone] 1 beta subcomplex subunit 4 OS=Homo sapiens OX=9606 GN=NDUFB4 PE=1 SV=3           | -0,108511617 | 0,355118 |
| P37108 | Signal recognition particle 14 kDa protein OS=Homo sapiens OX=9606 GN=SRP14 PE=1 SV=2                             | -0,064991831 | 0,354573 |
| Q9Y216 | Myotubularin-related protein 7 OS=Homo sapiens OX=9606 GN=MTMR7 PE=1 SV=3                                         | -0,058404198 | 0,354502 |
| Q9NPF3 | Acyl-coenzyme A thioesterase 13 OS=Homo sapiens OX=9606 GN=ACOT13 PE=1 SV=1                                       | -0,149690342 | 0,354409 |
| Q6PD62 | RNA polymerase-associated protein CTR9 homolog OS=Homo sapiens OX=9606 GN=CTR9 PE=1 SV=1                          | -0,050895758 | 0,354359 |
| Q9NWF9 | E3 ubiquitin-protein ligase RNF216 OS=Homo sapiens OX=9606 GN=RNF216 PE=1 SV=3                                    | 0,084330511  | 0,353848 |
| P48047 | ATP synthase subunit O, mitochondrial OS=Homo sapiens OX=9606 GN=ATP5PO PE=1 SV=1                                 | 0,056555925  | 0,353729 |
| Q9Y613 | Epsin-1 OS=Homo sapiens OX=9606 GN=EPN1 PE=1 SV=2                                                                 | -0,064700129 | 0,352827 |
| Q15276 | Rab GTPase-binding effector protein 1 OS=Homo sapiens OX=9606 GN=RABEP1 PE=1 SV=2                                 | -0,060066068 | 0,352379 |
| O43447 | Peptidyl-prolyl cis-trans isomerase H OS=Homo sapiens OX=9606 GN=PIPH PE=1 SV=1                                   | 0,059995445  | 0,351924 |
| O75947 | ATP synthase subunit d, mitochondrial OS=Homo sapiens OX=9606 GN=ATP5PD PE=1 SV=3                                 | -0,059983902 | 0,35185  |
| Q9BQ67 | Glutamate-rich WD repeat-containing protein 1 OS=Homo sapiens OX=9606 GN=GRWD1 PE=1 SV=1                          | 0,078061842  | 0,351759 |
| O43823 | A-kinase anchor protein 8 OS=Homo sapiens OX=9606 GN=AKAP8 PE=1 SV=1                                              | 0,089124111  | 0,351349 |
| O75448 | Mediator of RNA polymerase II transcription subunit 24 OS=Homo sapiens OX=9606 GN=MED24 PE=1 SV=1                 | -0,064420173 | 0,351153 |
| Q07617 | Sperm-associated antigen 1 OS=Homo sapiens OX=9606 GN=SPAG1 PE=1 SV=3                                             | 0,107271785  | 0,350739 |
| Q13162 | Peroxiredoxin-4 OS=Homo sapiens OX=9606 GN=PRDX4 PE=1 SV=1                                                        | -0,048156349 | 0,350724 |
| P23258 | Tubulin gamma-1 chain OS=Homo sapiens OX=9606 GN=TUBG1 PE=1 SV=2                                                  | -0,041426642 | 0,350662 |
| P22830 | Ferrochelatase, mitochondrial OS=Homo sapiens OX=9606 GN=FECH PE=1 SV=2                                           | 0,147954989  | 0,350108 |
| P14174 | Macrophage migration inhibitory factor OS=Homo sapiens OX=9606 GN=MIF PE=1 SV=4                                   | 0,147879471  | 0,349921 |
| Q6VMQ6 | Activating transcription factor 7-interacting protein 1 OS=Homo sapiens OX=9606 GN=ATF7IP PE=1 SV=3               | -0,103620094 | 0,349475 |
| Q9H832 | Ubiquitin-conjugating enzyme E2 Z OS=Homo sapiens OX=9606 GN=UBE2Z PE=1 SV=2                                      | -0,050247271 | 0,349396 |
| P63172 | Dynein light chain Ctlex-type 1 OS=Homo sapiens OX=9606 GN=DYNL1L PE=1 SV=1                                       | 0,077421495  | 0,348608 |
| Q9BSQ5 | Cerebral cavernous malformations 2 protein OS=Homo sapiens OX=9606 GN=CCM2 PE=1 SV=1                              | -0,147101573 | 0,347993 |
| Q9BYD6 | 39S ribosomal protein L1, mitochondrial OS=Homo sapiens OX=9606 GN=MRPL1 PE=1 SV=2                                | -0,106229123 | 0,347062 |
| P57060 | RWD domain-containing protein 2B OS=Homo sapiens OX=9606 GN=RWD2B PE=1 SV=1                                       | -0,146646051 | 0,346864 |
| P48643 | T-complex protein 1 subunit epsilon OS=Homo sapiens OX=9606 GN=CCT5 PE=1 SV=1                                     | 0,028696743  | 0,346331 |
| Q14677 | Clathrin interactor 1 OS=Homo sapiens OX=9606 GN=CLINT1 PE=1 SV=1                                                 | 0,042254552  | 0,345992 |
| Q9BZL4 | Protein phosphatase 1 regulatory subunit 12C OS=Homo sapiens OX=9606 GN=PPP1R12C PE=1 SV=1                        | 0,055241176  | 0,344708 |
| Q8TDN6 | Ribosome biogenesis protein BRX1 homolog OS=Homo sapiens OX=9606 GN=BRX1 PE=1 SV=2                                | -0,047367871 | 0,344416 |
| O60925 | Prefoldin subunit 1 OS=Homo sapiens OX=9606 GN=PPFDN1 PE=1 SV=2                                                   | -0,068946882 | 0,344268 |
| P41223 | Protein BUD31 homolog OS=Homo sapiens OX=9606 GN=BUD31 PE=1 SV=2                                                  | -0,076459124 | 0,34388  |
| P53602 | Diphosphomevalonate decarboxylase OS=Homo sapiens OX=9606 GN=MVD PE=1 SV=1                                        | -0,105299119 | 0,343786 |
| Q9NNW7 | Thioredoxin reductase 2, mitochondrial OS=Homo sapiens OX=9606 GN=TXNRD2 PE=1 SV=3                                | -0,094546434 | 0,343772 |
| Q99698 | Lysosomal-traffic regulator OS=Homo sapiens OX=9606 GN=LYST PE=1 SV=3                                             | -0,145169644 | 0,343207 |
| Q02880 | DNA topoisomerase 2-beta OS=Homo sapiens OX=9606 GN=TOP2B PE=1 SV=3                                               | -0,035277197 | 0,342937 |
| Q9H089 | Large subunit GTPase 1 homolog OS=Homo sapiens OX=9606 GN=LSG1 PE=1 SV=2                                          | -0,068672159 | 0,342768 |
| P05023 | Sodium/potassium-transporting ATPase subunit alpha-1 OS=Homo sapiens OX=9606 GN=ATP1A1 PE=1 SV=1                  | 0,027910472  | 0,341728 |
| P84157 | Matrix-remodeling-associated protein 7 OS=Homo sapiens OX=9606 GN=MXRA7 PE=1 SV=1                                 | -0,104635962 | 0,341452 |
| Q7LBR1 | Charged multivesicular body protein 1b OS=Homo sapiens OX=9606 GN=CHMP1B PE=1 SV=1                                | -0,104503758 | 0,340987 |
| Q9HCN4 | GPN-loop GTPase 1 OS=Homo sapiens OX=9606 GN=GPN1 PE=1 SV=1                                                       | 0,062527173  | 0,339864 |
| Q9UPU7 | TBC1 domain family member 2B OS=Homo sapiens OX=9606 GN=TBC1D2B PE=1 SV=2                                         | 0,143604645  | 0,339332 |
| O95251 | Histone acetyltransferase KAT7 OS=Homo sapiens OX=9606 GN=KAT7 PE=1 SV=1                                          | 0,143386663  | 0,338792 |
| Q13885 | Tubulin beta-2A chain OS=Homo sapiens OX=9606 GN=TUBB2A PE=1 SV=1                                                 | 0,026478993  | 0,338574 |
| O75676 | Ribosomal protein S6 kinase alpha-4 OS=Homo sapiens OX=9606 GN=RPS6KA4 PE=1 SV=1                                  | -0,14328146  | 0,338532 |
| O00459 | Phosphatidylinositol 3-kinase regulatory subunit beta OS=Homo sapiens OX=9606 GN=PIK3R2 PE=1 SV=2                 | 0,103779228  | 0,338439 |
| P49840 | Glycogen synthase kinase-3 alpha OS=Homo sapiens OX=9606 GN=GSK3A PE=1 SV=2                                       | -0,057870882 | 0,338283 |
| Q6QNK2 | Adhesion G-protein coupled receptor D1 OS=Homo sapiens OX=9606 GN=ADGRD1 PE=1 SV=1                                | 0,253949795  | 0,337656 |
| P61009 | Signal peptidase complex subunit 3 OS=Homo sapiens OX=9606 GN=SPCS3 PE=1 SV=1                                     | 0,103498373  | 0,337452 |
| Q9NRG0 | Chromatin accessibility complex protein 1 OS=Homo sapiens OX=9606 GN=CHRAC1 PE=1 SV=1                             | 0,16205774   | 0,336856 |
| Q92947 | Glutaryl-CoA dehydrogenase, mitochondrial OS=Homo sapiens OX=9606 GN=GCDH PE=1 SV=1                               | -0,142528531 | 0,336668 |

|        |                                                                                                                |               |          |
|--------|----------------------------------------------------------------------------------------------------------------|---------------|----------|
| P24539 | ATP synthase F(0) complex subunit B1, mitochondrial OS=Homo sapiens OX=9606 GN=ATP5PB PE=1 SV=2                | 0,051052346   | 0,336323 |
| Q8N3U4 | Cohesin subunit SA-2 OS=Homo sapiens OX=9606 GN=STAG2 PE=1 SV=3                                                | 0,142249934   | 0,335979 |
| Q96JB2 | Conserved oligomeric Golgi complex subunit 3 OS=Homo sapiens OX=9606 GN=COG3 PE=1 SV=3                         | 0,102850618   | 0,335177 |
| Q9GZT4 | Serine racemase OS=Homo sapiens OX=9606 GN=SRR PE=1 SV=1                                                       | -0,084939688  | 0,333456 |
| O95684 | FGFR1 oncogene partner OS=Homo sapiens OX=9606 GN=FGFR1OP PE=1 SV=1                                            | -0,141000191  | 0,332887 |
| P20337 | Ras-related protein Rab-3B OS=Homo sapiens OX=9606 GN=RAB3B PE=1 SV=2                                          | -0,061334382  | 0,332781 |
| Q15007 | Pre-mRNA-splicing regulator WTAP OS=Homo sapiens OX=9606 GN=WTAP PE=1 SV=2                                     | -0,074098511  | 0,332322 |
| Q535F7 | Cordon-bleu protein-like 1 OS=Homo sapiens OX=9606 GN=COBL1 PE=1 SV=2                                          | -0,140566994  | 0,331815 |
| Q9ULW0 | Targeting protein for Xklp2 OS=Homo sapiens OX=9606 GN=TPX2 PE=1 SV=2                                          | -0,0643795005 | 0,330941 |
| Q9ULU4 | Protein kinase C-binding protein 1 OS=Homo sapiens OX=9606 GN=ZMYND8 PE=1 SV=2                                 | -0,060883326  | 0,330108 |
| O60832 | H/ACA ribonucleoprotein complex subunit DKC1 OS=Homo sapiens OX=9606 GN=DKC1 PE=1 SV=3                         | 0,047655669   | 0,329676 |
| O95782 | AP-2 complex subunit alpha-1 OS=Homo sapiens OX=9606 GN=AP2A1 PE=1 SV=3                                        | -0,021649297  | 0,329425 |
| Q86VY9 | Hermansky-Pudlak syndrome 6 protein OS=Homo sapiens OX=9606 GN=HPS6 PE=1 SV=1                                  | -0,083945344  | 0,329223 |
| O94953 | Lysine-specific demethylase 4B OS=Homo sapiens OX=9606 GN=KDM4B PE=1 SV=4                                      | 0,18246499    | 0,32916  |
| Q9UKS6 | Protein kinase C and casein kinase substrate in neurons protein 3 OS=Homo sapiens OX=9606 GN=PAC3IN3 PE=1 SV=2 | -0,073352804  | 0,328682 |
| P41227 | N-alpha-acetyltransferase 10 OS=Homo sapiens OX=9606 GN=NAA10 PE=1 SV=1                                        | -0,041792981  | 0,328044 |
| Q9C005 | Protein dpy-30 homolog OS=Homo sapiens OX=9606 GN=DPY30 PE=1 SV=1                                              | 0,08354448    | 0,327518 |
| Q53G57 | Nucleoporin GLE1 OS=Homo sapiens OX=9606 GN=GLE1 PE=1 SV=2                                                     | 0,065845686   | 0,327394 |
| P36507 | Dual specificity mitogen-activated protein kinase kinase 2 OS=Homo sapiens OX=9606 GN=MAP2K2 PE=1 SV=1         | -0,038913925  | 0,327372 |
| Q8IYT2 | Cap-specific mRNA (nucleoside-2'-O-)-methyltransferase 2 OS=Homo sapiens OX=9606 GN=CMTR2 PE=1 SV=2            | -0,060168519  | 0,327355 |
| P14324 | Farnesyl pyrophosphate synthase OS=Homo sapiens OX=9606 GN=FDPS PE=1 SV=4                                      | -0,056117269  | 0,327087 |
| Q96PE2 | Rho guanine nucleotide exchange factor 17 OS=Homo sapiens OX=9606 GN=ARHGEF17 PE=1 SV=1                        | -0,140984481  | 0,326615 |
| Q9NR56 | Muscleblind-like protein 1 OS=Homo sapiens OX=9606 GN=MBNL1 PE=1 SV=2                                          | 0,100348865   | 0,326407 |
| Q8NEY8 | Periplin-1 OS=Homo sapiens OX=9606 GN=PPHLN1 PE=1 SV=2                                                         | 0,100211777   | 0,325927 |
| O00244 | Copper transport protein ATOX1 OS=Homo sapiens OX=9606 GN=ATOX1 PE=1 SV=1                                      | 0,072706634   | 0,325533 |
| O95674 | Phosphatidate cytidylyltransferase 2 OS=Homo sapiens OX=9606 GN=CDS2 PE=1 SV=1                                 | -0,137885588  | 0,325185 |
| P62837 | Ubiquitin-conjugating enzyme E2 D2 OS=Homo sapiens OX=9606 GN=UBE2D2 PE=1 SV=1                                 | -0,099984471  | 0,325131 |
| Q55XK2 | snRNA-activating protein complex subunit 4 OS=Homo sapiens OX=9606 GN=SNAPC4 PE=1 SV=1                         | 0,137732874   | 0,324808 |
| Q15208 | Serine/threonine-protein kinase 38 OS=Homo sapiens OX=9606 GN=STK38 PE=1 SV=1                                  | 0,059946943   | 0,32457  |
| Q96KP1 | Exocyst complex component 2 OS=Homo sapiens OX=9606 GN=EXOC2 PE=1 SV=1                                         | -0,046955694  | 0,324382 |
| O60504 | Vinexin OS=Homo sapiens OX=9606 GN=SORBS3 PE=1 SV=2                                                            | -0,044631588  | 0,322671 |
| O43399 | Tumor protein D54 OS=Homo sapiens OX=9606 GN=TPD52L2 PE=1 SV=2                                                 | 0,039701108   | 0,322565 |
| Q9Y673 | Dolichyl-phosphate beta-glucosyltransferase OS=Homo sapiens OX=9606 GN=ALG5 PE=1 SV=1                          | 0,145746236   | 0,322389 |
| P62987 | Ubiquitin-60S ribosomal protein L40 OS=Homo sapiens OX=9606 GN=UBA52 PE=1 SV=2                                 | -0,071926415  | 0,321737 |
| Q93063 | Exostosin-2 OS=Homo sapiens OX=9606 GN=EXT2 PE=1 SV=1                                                          | -0,136101528  | 0,320777 |
| Q86V88 | Rotatin OS=Homo sapiens OX=9606 GN=RTTN PE=1 SV=3                                                              | 0,136090806   | 0,32075  |
| Q16342 | Programmed cell death protein 2 OS=Homo sapiens OX=9606 GN=PDCC2 PE=1 SV=2                                     | -0,135977714  | 0,320471 |
| O15460 | Prolyl 4-hydroxylase subunit alpha-2 OS=Homo sapiens OX=9606 GN=P4HA2 PE=1 SV=1                                | 0,033993166   | 0,320324 |
| O95182 | NADH dehydrogenase [ubiquinone] 1 alpha subcomplex subunit 7 OS=Homo sapiens OX=9606 GN=NDUFA7 PE=1 SV=3       | 0,135870403   | 0,320206 |
| Q9NVT9 | Armadiello repeat-containing protein 1 OS=Homo sapiens OX=9606 GN=ARMC1 PE=1 SV=1                              | -0,081813233  | 0,32017  |
| P08134 | Rho-related GTP-binding protein RhoC OS=Homo sapiens OX=9606 GN=RHOC PE=1 SV=1                                 | -0,044288256  | 0,319959 |
| Q15560 | Eukaryotic elongation factor A protein 2 OS=Homo sapiens OX=9606 GN=TCEA2 PE=1 SV=1                            | 0,098503589   | 0,319955 |
| O60573 | Translation initiation factor 4E type 2 OS=Homo sapiens OX=9606 GN=EIF4E2 PE=1 SV=1                            | -0,1357578    | 0,319928 |
| Q92878 | DNA repair protein RAD50 OS=Homo sapiens OX=9606 GN=RAD50 PE=1 SV=1                                            | -0,040775811  | 0,319318 |
| Q14627 | Interleukin-13 receptor subunit alpha-2 OS=Homo sapiens OX=9606 GN=IL13RA2 PE=1 SV=1                           | -0,071393207  | 0,319146 |
| O43815 | Striatin OS=Homo sapiens OX=9606 GN=STRN PE=1 SV=4                                                             | -0,037987194  | 0,318849 |
| Q99471 | Prefoldin subunit 5 OS=Homo sapiens OX=9606 GN=PFDN5 PE=1 SV=2                                                 | 0,05897397    | 0,318831 |
| Q9P2K3 | #N/D                                                                                                           | 0,13512646    | 0,318368 |
| P61960 | Ubiquitin-fold modifier 1 OS=Homo sapiens OX=9606 GN=UFM1 PE=1 SV=1                                            | 0,097934929   | 0,317969 |
| Q07157 | Tight junction protein ZO-1 OS=Homo sapiens OX=9606 GN=TJP1 PE=1 SV=3                                          | 0,032115368   | 0,317589 |
| P0DMM9 | Sulfotransferase 1A3 OS=Homo sapiens OX=9606 GN=SULT1A3 PE=1 SV=1                                              | -0,051249272  | 0,31755  |
| Q15813 | Tubulin-specific chaperone E OS=Homo sapiens OX=9606 GN=TBCE PE=1 SV=1                                         | -0,045851022  | 0,316053 |
| Q86VW0 | SEC14 domain and spectrin repeat-containing protein 1 OS=Homo sapiens OX=9606 GN=SESTD1 PE=1 SV=2              | -0,134007154  | 0,315605 |
| Q3ZCW2 | Galectin-related protein OS=Homo sapiens OX=9606 GN=LGALS1 PE=1 SV=2                                           | -0,133588643  | 0,314572 |
| Q99661 | Kinesin-like protein KIF2C OS=Homo sapiens OX=9606 GN=KIF2C PE=1 SV=2                                          | -0,05412635   | 0,314448 |
| Q9UM54 | Unconventional myosin-VI OS=Homo sapiens OX=9606 GN=MYO6 PE=1 SV=4                                             | -0,037309942  | 0,312643 |
| Q96BZ8 | Leukocyte receptor cluster member 1 OS=Homo sapiens OX=9606 GN=LENG1 PE=1 SV=1                                 | 0,079994734   | 0,312475 |
| P18583 | Protein SON OS=Homo sapiens OX=9606 GN=SON PE=1 SV=4                                                           | 0,026873395   | 0,310847 |
| Q14118 | Dystroglycan OS=Homo sapiens OX=9606 GN=DAG1 PE=1 SV=2                                                         | 0,045105119   | 0,310449 |
| P56962 | Syntaxin-17 OS=Homo sapiens OX=9606 GN=STX17 PE=1 SV=2                                                         | 0,13189476    | 0,310392 |
| Q9H019 | Mitochondrial fission regulator 1-like OS=Homo sapiens OX=9606 GN=MTRFRL1 PE=1 SV=2                            | -0,131628273  | 0,309735 |
| Q8N5M4 | Tetrapeptide repeat protein 9C OS=Homo sapiens OX=9606 GN=TT9C PE=1 SV=1                                       | 0,131580186   | 0,309616 |
| Q6GMV3 | Putative peptidyl-tRNA hydrolase PTRHD1 OS=Homo sapiens OX=9606 GN=PTRHD1 PE=1 SV=1                            | 0,079211207   | 0,309167 |
| Q99536 | Synaptic vesicle membrane protein VAT-1 homolog OS=Homo sapiens OX=9606 GN=VAT1 PE=1 SV=2                      | 0,034714605   | 0,308869 |
| Q8N2F6 | Armadiello repeat-containing protein 10 OS=Homo sapiens OX=9606 GN=ARMC10 PE=1 SV=1                            | -0,069258997  | 0,308805 |
| Q9P212 | 1-phosphatidylinositol 4,5-bisphosphate phosphodiesterase epsilon-1 OS=Homo sapiens OX=9606 GN=PLCE1 PE=1 SV=3 | -0,131176264  | 0,30862  |
| P52758 | 2-iminobutanoate/2-iminopropanoate deaminase OS=Homo sapiens OX=9606 GN=RIDA PE=1 SV=1                         | 0,095177229   | 0,30836  |
| P56589 | Peroxisomal biogenesis factor 3 OS=Homo sapiens OX=9606 GN=PEX3 PE=1 SV=1                                      | 0,13103777    | 0,308278 |
| P29323 | Ephrin type-B receptor 2 OS=Homo sapiens OX=9606 GN=EPHB2 PE=1 SV=5                                            | -0,069061931  | 0,307853 |
| Q9H788 | SH2 domain-containing protein 4A OS=Homo sapiens OX=9606 GN=SH2D4A PE=1 SV=1                                   | 0,047021103   | 0,30742  |
| Q9Y6D9 | Mitotic spindle assembly checkpoint protein MAD1 OS=Homo sapiens OX=9606 GN=MAD1L1 PE=1 SV=2                   | 0,062143816   | 0,307419 |
| O95707 | Ribonuclease P protein subunit p29 OS=Homo sapiens OX=9606 GN=POP4 PE=1 SV=2                                   | -0,094715278  | 0,306754 |
| Q86Y39 | NADH dehydrogenase [ubiquinone] 1 alpha subcomplex subunit 11 OS=Homo sapiens OX=9606 GN=NDUFA11 PE=1 SV=3     | -0,17056109   | 0,306732 |
| O00571 | ATP-dependent RNA helicase DDX3X OS=Homo sapiens OX=9606 GN=DDX3X PE=1 SV=3                                    | 0,025287239   | 0,306691 |
| Q9BUQ8 | Probable ATP-dependent RNA helicase DDX23 OS=Homo sapiens OX=9606 GN=DDX23 PE=1 SV=3                           | -0,035511529  | 0,306567 |
| P51149 | Ras-related protein Rab-7a OS=Homo sapiens OX=9606 GN=RAB7A PE=1 SV=1                                          | -0,037870827  | 0,306359 |
| Q9NUQ8 | ATP-binding cassette sub-family F member 3 OS=Homo sapiens OX=9606 GN=ABCF3 PE=1 SV=2                          | -0,035435094  | 0,305848 |
| P55789 | FAD-linked sulfhydryl oxidase ALR OS=Homo sapiens OX=9606 GN=GFER PE=1 SV=2                                    | -0,10710386   | 0,304395 |
| Q8IY67 | Ribonucleoprotein PTB-binding 1 OS=Homo sapiens OX=9606 GN=RAVER1 PE=1 SV=1                                    | -0,040551106  | 0,304256 |
| Q96KA5 | Cleft lip and palate transmembrane protein 1-like protein OS=Homo sapiens OX=9606 GN=CLPTM1L PE=1 SV=1         | 0,05645161    | 0,304049 |
| Q7Z7L1 | Schlafen family member 11 OS=Homo sapiens OX=9606 GN=SLFN11 PE=1 SV=2                                          | -0,093936718  | 0,304049 |
| P21127 | Cyclin-dependent kinase 11B OS=Homo sapiens OX=9606 GN=CDK11B PE=1 SV=4                                        | -0,049214443  | 0,303841 |
| P0C0L4 | Complement C4-A OS=Homo sapiens OX=9606 GN=C4A PE=1 SV=2                                                       | -0,129182251  | 0,303704 |
| Q8WWI1 | LIM domain only protein 7 OS=Homo sapiens OX=9606 GN=LMO7 PE=1 SV=3                                            | -0,018212053  | 0,303703 |
| Q9Y2H1 | Serine/threonine-protein kinase 38-like OS=Homo sapiens OX=9606 GN=STK38L PE=1 SV=3                            | -0,147820747  | 0,303452 |
| Q96BP3 | Peptidylprolyl isomerase domain and WD repeat-containing protein 1 OS=Homo sapiens OX=9606 GN=PPWD1 PE=1 SV=1  | 0,129062187   | 0,303408 |
| Q8TCY9 | Up-regulator of cell proliferation OS=Homo sapiens OX=9606 GN=URGCP PE=1 SV=2                                  | -0,077763149  | 0,303065 |
| Q9NZD8 | Maspardin OS=Homo sapiens OX=9606 GN=SPG21 PE=1 SV=1                                                           | -0,077406014  | 0,301563 |
| Q09472 | #N/D                                                                                                           | 0,060998985   | 0,301278 |
| Q13769 | THO complex subunit 5 homolog OS=Homo sapiens OX=9606 GN=THOC5 PE=1 SV=2                                       | -0,127867028  | 0,300464 |
| Q7L5D6 | Golgi to ER traffic protein 4 homolog OS=Homo sapiens OX=9606 GN=GET4 PE=1 SV=1                                | 0,067373467   | 0,299709 |

|        |                                                                                                                                                         |              |          |
|--------|---------------------------------------------------------------------------------------------------------------------------------------------------------|--------------|----------|
| P48730 | Casein kinase I isoform delta OS=Homo sapiens OX=9606 GN=CSNK1D PE=1 SV=2                                                                               | -0,127522113 | 0,299614 |
| O00584 | Ribonuclease T2 OS=Homo sapiens OX=9606 GN=RNASET2 PE=1 SV=2                                                                                            | 0,127454019  | 0,299447 |
| Q9H307 | Pinin OS=Homo sapiens OX=9606 GN=PNN PE=1 SV=5                                                                                                          | -0,032773305 | 0,299047 |
| Q75165 | DnaJ homolog subfamily C member 13 OS=Homo sapiens OX=9606 GN=DNAJC13 PE=1 SV=5                                                                         | -0,022975192 | 0,298693 |
| Q6P6C2 | RNA demethylase ALKBH5 OS=Homo sapiens OX=9606 GN=ALKBH5 PE=1 SV=2                                                                                      | -0,127133451 | 0,298657 |
| Q9BW19 | Kinesin-like protein KIFC1 OS=Homo sapiens OX=9606 GN=KIFC1 PE=1 SV=2                                                                                   | -0,127099921 | 0,298575 |
| Q86UE4 | Protein LYRIC OS=Homo sapiens OX=9606 GN=MTDH PE=1 SV=2                                                                                                 | 0,032677605  | 0,298096 |
| Q658Y4 | Protein FAM91A1 OS=Homo sapiens OX=9606 GN=FAM91A1 PE=1 SV=3                                                                                            | -0,076508056 | 0,297789 |
| P48634 | Protein PRRC2A OS=Homo sapiens OX=9606 GN=PRRC2A PE=1 SV=3                                                                                              | -0,048292424 | 0,297658 |
| Q16643 | Drebrin OS=Homo sapiens OX=9606 GN=DRBN1 PE=1 SV=4                                                                                                      | -0,030194519 | 0,296902 |
| P57737 | Coronin-7 OS=Homo sapiens OX=9606 GN=CORO7 PE=1 SV=2                                                                                                    | -0,048056721 | 0,296081 |
| Q6UN15 | Pre-mRNA 3'-end-processing factor FIP1 OS=Homo sapiens OX=9606 GN=FIP1L1 PE=1 SV=1                                                                      | 0,066525212  | 0,295629 |
| P14868 | Aspartate--tRNA ligase, cytoplasmic OS=Homo sapiens OX=9606 GN=DARS PE=1 SV=2                                                                           | -0,023727245 | 0,295606 |
| Q10472 | Polypeptide N-acetylgalactosaminyltransferase 1 OS=Homo sapiens OX=9606 GN=GALNT1 PE=1 SV=1                                                             | -0,05113373  | 0,29559  |
| Q96151 | RCCL1-like G exchanging factor-like protein OS=Homo sapiens OX=9606 GN=RCCL1 PE=1 SV=2                                                                  | 0,037521812  | 0,295502 |
| Q9NSV4 | Protein diaphanous homolog 3 OS=Homo sapiens OX=9606 GN=DIAPH3 PE=1 SV=4                                                                                | 0,045320407  | 0,295347 |
| Q9UJA5 | tRNA (adenine(58)-N(1))-methyltransferase non-catalytic subunit TRM6 OS=Homo sapiens OX=9606 GN=TRMT6 PE=1 SV=5                                         | 0,066436287  | 0,295201 |
| O95479 | GDH/6PGL endoplasmic bifunctional protein OS=Homo sapiens OX=9606 GN=H6PD PE=1 SV=2                                                                     | 0,125604057  | 0,294892 |
| Q96Q08 | Exportin-6 OS=Homo sapiens OX=9606 GN=XPO6 PE=1 SV=1                                                                                                    | 0,066244634  | 0,294281 |
| P11182 | Lipoamide acyltransferase component of branched-chain alpha-keto acid dehydrogenase complex, mitochondrial OS=Homo sapiens OX=9606 GN=BCDH1B PE=1 SV=2  | 0,090997165  | 0,293859 |
| P52294 | Importin subunit alpha-5 OS=Homo sapiens OX=9606 GN=KPNA1 PE=1 SV=3                                                                                     | -0,0595844   | 0,293715 |
| P55957 | BH3-interacting domain death agonist OS=Homo sapiens OX=9606 GN=BDID PE=1 SV=1                                                                          | -0,050828548 | 0,293606 |
| Q9Y371 | Endophilin-B1 OS=Homo sapiens OX=9606 GN=SH3GLB1 PE=1 SV=1                                                                                              | -0,050798439 | 0,293488 |
| P21266 | Glutathione S-transferase Mu 3 OS=Homo sapiens OX=9606 GN=GSTM3 PE=1 SV=3                                                                               | -0,039192919 | 0,293187 |
| Q9UKK3 | Protein mono-ADP-ribosyltransferase PARP4 OS=Homo sapiens OX=9606 GN=PARP4 PE=1 SV=3                                                                    | 0,030537158  | 0,292876 |
| P27105 | Erythrocyte band 7 integral membrane protein OS=Homo sapiens OX=9606 GN=STOM PE=1 SV=3                                                                  | 0,04496794   | 0,292854 |
| Q9HC52 | Chromobox protein homolog 8 OS=Homo sapiens OX=9606 GN=CBX8 PE=1 SV=3                                                                                   | 0,124548105  | 0,292294 |
| O95159 | Zinc finger protein-like 1 OS=Homo sapiens OX=9606 GN=ZFP11 PE=1 SV=2                                                                                   | -0,059318036 | 0,292294 |
| Q9H492 | Microtubule-associated proteins 1A/1B light chain 3A OS=Homo sapiens OX=9606 GN=MAP1LC3A PE=1 SV=2                                                      | 0,090517868  | 0,292201 |
| Q9P0V9 | Septin-10 OS=Homo sapiens OX=9606 GN=SEPTIN10 PE=1 SV=2                                                                                                 | -0,032975162 | 0,292052 |
| P62318 | Small nuclear ribonucleoprotein Sm D3 OS=Homo sapiens OX=9606 GN=SNRPD3 PE=1 SV=1                                                                       | 0,075048108  | 0,291667 |
| O95292 | Vesicle-associated membrane protein-associated protein B/C OS=Homo sapiens OX=9606 GN=VAPB PE=1 SV=3                                                    | -0,047374433 | 0,291521 |
| Q96B11 | Solute carrier family 22 member 18 OS=Homo sapiens OX=9606 GN=SLC22A18 PE=1 SV=3                                                                        | 0,124209411  | 0,291461 |
| Q8NE71 | ATP-binding cassette sub-family F member 1 OS=Homo sapiens OX=9606 GN=ABCF1 PE=1 SV=2                                                                   | 0,032906252  | 0,291389 |
| Q86U42 | Polyadenylate-binding protein 2 OS=Homo sapiens OX=9606 GN=PABPN1 PE=1 SV=3                                                                             | -0,054267893 | 0,291287 |
| P51003 | Poly(A) polymerase alpha OS=Homo sapiens OX=9606 GN=PAPOLA PE=1 SV=4                                                                                    | 0,044746098  | 0,291286 |
| Q96BD5 | PHD finger protein 21A OS=Homo sapiens OX=9606 GN=PHF21A PE=1 SV=1                                                                                      | -0,124052698 | 0,291076 |
| Q8IYB9 | Zinc finger protein 595 OS=Homo sapiens OX=9606 GN=ZNF595 PE=2 SV=2                                                                                     | 0,038187227  | 0,290888 |
| Q6UW63 | Protein O-glucosyltransferase 2 OS=Homo sapiens OX=9606 GN=POGLUT2 PE=1 SV=1                                                                            | -0,050350506 | 0,290683 |
| Q722W4 | Zinc finger CCH-type antiviral protein 1 OS=Homo sapiens OX=9606 GN=ZC3HAV1 PE=1 SV=3                                                                   | -0,033804506 | 0,290561 |
| Q8TEQ0 | Sorting nexin-29 OS=Homo sapiens OX=9606 GN=SNX29 PE=1 SV=3                                                                                             | 0,123773101  | 0,290388 |
| P29279 | CCN family member 2 OS=Homo sapiens OX=9606 GN=CCN2 PE=1 SV=2                                                                                           | 0,074700615  | 0,290212 |
| P50416 | Carnitine O-palmitoyltransferase 1, liver isoform OS=Homo sapiens OX=9606 GN=CPT1A PE=1 SV=2                                                            | -0,040403854 | 0,289521 |
| P42025 | Beta-centractin OS=Homo sapiens OX=9606 GN=ACTR1B PE=1 SV=1                                                                                             | -0,089591892 | 0,289001 |
| Q9Y6I9 | Testis-expressed protein 264 OS=Homo sapiens OX=9606 GN=TEX264 PE=1 SV=1                                                                                | 0,089531157  | 0,288791 |
| P67936 | Tropomyosin alpha-4 chain OS=Homo sapiens OX=9606 GN=TPM4 PE=1 SV=3                                                                                     | 0,027565693  | 0,288767 |
| O95218 | Zinc finger Ran-binding domain-containing protein 2 OS=Homo sapiens OX=9606 GN=ZRANB2 PE=1 SV=2                                                         | -0,053605869 | 0,287441 |
| Q96519 | Methyltransferase-like 26 OS=Homo sapiens OX=9606 GN=METT126 PE=1 SV=2                                                                                  | -0,089021416 | 0,287031 |
| P52943 | Cysteine-rich protein 2 OS=Homo sapiens OX=9606 GN=CRIP2 PE=1 SV=1                                                                                      | 0,049765547  | 0,287025 |
| O14920 | Inhibitor of nuclear factor kappa-B kinase subunit beta OS=Homo sapiens OX=9606 GN=IKKB PE=1 SV=1                                                       | -0,088934537 | 0,286731 |
| O75427 | Leucine-rich repeat and calponin homology domain-containing protein 4 OS=Homo sapiens OX=9606 GN=LRCH4 PE=1 SV=2                                        | 0,122214921  | 0,286557 |
| Q9UBI1 | LCM domain-containing protein 3 OS=Homo sapiens OX=9606 GN=CCMD3 PE=1 SV=1                                                                              | -0,064575753 | 0,28628  |
| Q9BSU1 | UPF0183 protein C16orf70 OS=Homo sapiens OX=9606 GN=C16orf70 PE=1 SV=1                                                                                  | 0,088802519  | 0,286276 |
| P62899 | 60S ribosomal protein L31 OS=Homo sapiens OX=9606 GN=RPL31 PE=1 SV=1                                                                                    | 0,05338627   | 0,286166 |
| Q07955 | Serine/arginine-rich splicing factor 1 OS=Homo sapiens OX=9606 GN=SRSF1 PE=1 SV=2                                                                       | -0,03679938  | 0,285562 |
| Q99543 | DNAJ homolog subfamily C member 2 OS=Homo sapiens OX=9606 GN=DNAJC2 PE=1 SV=4                                                                           | -0,034300321 | 0,285295 |
| P53779 | #N/D                                                                                                                                                    | 0,053167241  | 0,284977 |
| Q8TCD5 | 5'(3')-deoxyribonucleotidase, cytosolic type OS=Homo sapiens OX=9606 GN=NT5C PE=1 SV=2                                                                  | 0,088142203  | 0,283998 |
| Q9Y546 | Leucine-rich repeat-containing protein 42 OS=Homo sapiens OX=9606 GN=LRRC42 PE=1 SV=1                                                                   | 0,121121701  | 0,283871 |
| Q9Y5X1 | Sorting nexin-9 OS=Homo sapiens OX=9606 GN=SNX9 PE=1 SV=1                                                                                               | 0,052836999  | 0,282983 |
| Q9H7E9 | UPF0488 protein C8orf33 OS=Homo sapiens OX=9606 GN=C8orf33 PE=1 SV=1                                                                                    | 0,034504832  | 0,282909 |
| Q9UBD5 | Origin recognition complex subunit 3 OS=Homo sapiens OX=9606 GN=ORC3 PE=1 SV=1                                                                          | -0,049047303 | 0,282544 |
| O75385 | Serine/threonine-protein kinase ULK1 OS=Homo sapiens OX=9606 GN=ULK1 PE=1 SV=2                                                                          | -0,119941044 | 0,280972 |
| Q9NRN7 | L-aminoadipate-semialdehyde dehydrogenase-phosphopantetheinyl transferase OS=Homo sapiens OX=9606 GN=AASDHI                                             | 0,063437245  | 0,280839 |
| Q8NI22 | Multiple coagulation factor deficiency protein 2 OS=Homo sapiens OX=9606 GN=MCFD2 PE=1 SV=1                                                             | -0,087183793 | 0,280697 |
| Q9UK76 | Jupiter microtubule associated homolog 1 OS=Homo sapiens OX=9606 GN=JPT1 PE=1 SV=3                                                                      | -0,045695567 | 0,280346 |
| O94915 | Protein furry homolog-like OS=Homo sapiens OX=9606 GN=FRYL PE=1 SV=2                                                                                    | 0,032701443  | 0,280287 |
| Q9H1K1 | Iron-sulfur cluster assembly enzyme ISCU, mitochondrial OS=Homo sapiens OX=9606 GN=ISCU PE=1 SV=2                                                       | 0,147713524  | 0,279569 |
| Q9H4L7 | SWI/SNF-related matrix-associated actin-dependent regulator of chromatin subfamily A containing DEAD/H box 1 OS=Homo sapiens OX=9606 GN=SMAD4 PE=1 SV=1 | -0,063080468 | 0,279136 |
| O75381 | Peroxisomal membrane protein PEX14 OS=Homo sapiens OX=9606 GN=PEX14 PE=1 SV=1                                                                           | 0,07708091   | 0,278883 |
| O75400 | Pre-mRNA-processing factor 40 homolog A OS=Homo sapiens OX=9606 GN=PRPF40A PE=1 SV=2                                                                    | -0,032549387 | 0,278875 |
| L0R6Q1 | SLC35A4 upstream open reading frame protein OS=Homo sapiens OX=9606 GN=SLC35A4 PE=3 SV=1                                                                | -0,071831945 | 0,278237 |
| O75489 | NADH dehydrogenase [ubiquinone] iron-sulfur protein 3, mitochondrial OS=Homo sapiens OX=9606 GN=NDUFS3 PE=1 SV=1                                        | -0,038883556 | 0,277732 |
| Q8TEW0 | Partitioning defective 3 homolog OS=Homo sapiens OX=9606 GN=PARD3 PE=1 SV=2                                                                             | -0,118415409 | 0,277228 |
| Q96E57 | SAGA-associated factor 29 OS=Homo sapiens OX=9606 GN=SGF29 PE=1 SV=1                                                                                    | -0,118385769 | 0,277155 |
| P35244 | Replication protein A 14 kDa subunit OS=Homo sapiens OX=9606 GN=RPA3 PE=1 SV=1                                                                          | -0,056466759 | 0,27714  |
| Q9H490 | Phosphatidylinositol glycan anchor biosynthesis class U protein OS=Homo sapiens OX=9606 GN=PIGU PE=1 SV=3                                               | 0,117979855  | 0,276159 |
| Q9NZ17 | Upstream-binding protein 1 OS=Homo sapiens OX=9606 GN=UBP1 PE=1 SV=1                                                                                    | -0,117813509 | 0,275751 |
| Q14254 | Flotillin-2 OS=Homo sapiens OX=9606 GN=FLOT2 PE=1 SV=2                                                                                                  | -0,042523317 | 0,275645 |
| Q16832 | Discoidin domain-containing receptor 2 OS=Homo sapiens OX=9606 GN=DDR2 PE=1 SV=2                                                                        | 0,062272238  | 0,275285 |
| P20618 | Proteasome subunit beta type-1 OS=Homo sapiens OX=9606 GN=PSMB1 PE=1 SV=2                                                                               | -0,038553376 | 0,275181 |
| Q9NSU2 | Three-prime repair exonuclease 1 OS=Homo sapiens OX=9606 GN=TREX1 PE=1 SV=2                                                                             | -0,117405051 | 0,27475  |
| O60911 | #N/D                                                                                                                                                    | -0,064603693 | 0,274056 |
| A2RUR9 | Coiled-coil domain-containing protein 144A OS=Homo sapiens OX=9606 GN=CCDC144A PE=2 SV=1                                                                | -0,117118046 | 0,274046 |
| Q9BVK6 | Transmembrane emp24 domain-containing protein 9 OS=Homo sapiens OX=9606 GN=TMED9 PE=1 SV=2                                                              | 0,116916836  | 0,273553 |
| Q99623 | Prohibitin-2 OS=Homo sapiens OX=9606 GN=PHB2 PE=1 SV=2                                                                                                  | -0,032937796 | 0,273037 |
| P46459 | Vesicle-fusing ATPase OS=Homo sapiens OX=9606 GN=NSF PE=1 SV=3                                                                                          | -0,02470583  | 0,273034 |
| Q9UKZ1 | CCR4-NOT transcription complex subunit 11 OS=Homo sapiens OX=9606 GN=CNOT11 PE=1 SV=1                                                                   | 0,116375522  | 0,272226 |
| O15400 | Syntaxin-7 OS=Homo sapiens OX=9606 GN=STX7 PE=1 SV=4                                                                                                    | -0,061607867 | 0,272124 |
| Q92871 | Phosphomannomutase 1 OS=Homo sapiens OX=9606 GN=PMM1 PE=1 SV=2                                                                                          | 0,115801769  | 0,271544 |
| P49368 | T-complex protein 1 subunit gamma OS=Homo sapiens OX=9606 GN=CCT3 PE=1 SV=4                                                                             | 0,02187358   | 0,270624 |

|            |                                                                                                                    |              |          |
|------------|--------------------------------------------------------------------------------------------------------------------|--------------|----------|
| O75116     | Rho-associated protein kinase 2 OS=Homo sapiens OX=9606 GN=ROCK2 PE=1 SV=4                                         | -0,022497313 | 0,270102 |
| P61599     | N-alpha-acetyltransferase 20 OS=Homo sapiens OX=9606 GN=NAA20 PE=1 SV=1                                            | 0,061080681  | 0,269619 |
| P62714     | Serine/threonine-protein phosphatase 2A catalytic subunit beta isoform OS=Homo sapiens OX=9606 GN=PPP2CB PE=1 SV=1 | -0,03364941  | 0,269476 |
| Q9Y4P8     | WD repeat domain phosphoinositide-interacting protein 2 OS=Homo sapiens OX=9606 GN=WIP1 PE=1 SV=1                  | -0,069485024 | 0,268486 |
| P07099     | Epoxide hydrolase 1 OS=Homo sapiens OX=9606 GN=EPHX1 PE=1 SV=1                                                     | -0,031386852 | 0,268114 |
| P16144     | Integrin beta-4 OS=Homo sapiens OX=9606 GN=ITGB4 PE=1 SV=5                                                         | -0,028848835 | 0,267975 |
| Q9NWI5     | Anoctamin-10 OS=Homo sapiens OX=9606 GN=ANO10 PE=1 SV=2                                                            | 0,054720424  | 0,267912 |
| Q9Y3E0     | Vesicle transport protein GOT1B OS=Homo sapiens OX=9606 GN=GOLT1B PE=1 SV=1                                        | -0,083455161 | 0,26789  |
| Q8IWW6     | Rho GTPase-activating protein 12 OS=Homo sapiens OX=9606 GN=ARHGAP12 PE=1 SV=1                                     | -0,069324062 | 0,267819 |
| Q6ZRP7     | Sulphydryl oxidase 2 OS=Homo sapiens OX=9606 GN=QSOX2 PE=1 SV=3                                                    | 0,04666951   | 0,267777 |
| Q15036     | Sorting nexin-17 OS=Homo sapiens OX=9606 GN=SNX17 PE=1 SV=1                                                        | 0,035879696  | 0,266644 |
| Q13451     | Peptidyl-prolyl cis-trans isomerase FKBP5 OS=Homo sapiens OX=9606 GN=FKBP5 PE=1 SV=2                               | 0,113888603  | 0,266134 |
| P62701     | 40S ribosomal protein S4, X isoform OS=Homo sapiens OX=9606 GN=RPS4X PE=1 SV=2                                     | -0,037370077 | 0,266066 |
| Q8NG11     | Tetraspanin-14 OS=Homo sapiens OX=9606 GN=TSPAN14 PE=1 SV=1                                                        | 0,150801385  | 0,264758 |
| Q9NP92     | 39S ribosomal protein S30, mitochondrial OS=Homo sapiens OX=9606 GN=MRPS30 PE=1 SV=2                               | -0,113135105 | 0,264289 |
| Q98Q58     | FYVE and coiled-coil domain-containing protein 1 OS=Homo sapiens OX=9606 GN=FYCO1 PE=1 SV=3                        | 0,082377431  | 0,264201 |
| P32321     | Deoxycytidylate deaminase OS=Homo sapiens OX=9606 GN=DCTD PE=1 SV=2                                                | -0,043237871 | 0,264097 |
| Q9Y262     | Eukaryotic translation initiation factor 3 subunit L OS=Homo sapiens OX=9606 GN=EIF3L PE=1 SV=1                    | -0,026342228 | 0,262492 |
| P55196     | Afadin OS=Homo sapiens OX=9606 GN=AFDN PE=1 SV=3                                                                   | 0,045638374  | 0,261407 |
| P09382     | Galectin-1 OS=Homo sapiens OX=9606 GN=LGALS1 PE=1 SV=2                                                             | 0,042779694  | 0,261083 |
| Q9HD42     | Charged multivesicular body protein 1a OS=Homo sapiens OX=9606 GN=CHMP1A PE=1 SV=1                                 | 0,045564752  | 0,260952 |
| Q9P2E9     | Ribosome-binding protein 1 OS=Homo sapiens OX=9606 GN=RRBP1 PE=1 SV=5                                              | 0,01819628   | 0,260674 |
| Q7Z5G4     | Golgin subfamily A member 7 OS=Homo sapiens OX=9606 GN=GOLGA7 PE=1 SV=2                                            | 0,111604118  | 0,260544 |
| Q9UI26     | Importin-11 OS=Homo sapiens OX=9606 GN=IPO11 PE=1 SV=1                                                             | 0,033785681  | 0,260357 |
| Q96AE7     | Tetratricopeptide repeat protein 17 OS=Homo sapiens OX=9606 GN=TTC17 PE=1 SV=1                                     | -0,081110957 | 0,259872 |
| Q9H6X2     | Anthrax toxin receptor 1 OS=Homo sapiens OX=9606 GN=ANTXR1 PE=1 SV=2                                               | 0,048710531  | 0,259222 |
| P47914     | 60S ribosomal protein L29 OS=Homo sapiens OX=9606 GN=RPL29 PE=1 SV=2                                               | -0,110945746 | 0,258935 |
| P27448     | MAP/microtubule affinity-regulating kinase 3 OS=Homo sapiens OX=9606 GN=MARK3 PE=1 SV=5                            | 0,070325926  | 0,258643 |
| Q03519     | Antigen peptide transporter 2 OS=Homo sapiens OX=9606 GN=TAP2 PE=1 SV=1                                            | 0,048571985  | 0,258429 |
| Q15070     | Mitochondrial inner membrane protein OXA1L OS=Homo sapiens OX=9606 GN=OXA1L PE=1 SV=3                              | -0,110692281 | 0,258315 |
| Q8IXM2     | Chromatin complexes subunit BAP18 OS=Homo sapiens OX=9606 GN=BAP18 PE=1 SV=1                                       | -0,067016923 | 0,258277 |
| Q9NPQ8     | Synembryn-A OS=Homo sapiens OX=9606 GN=RIC8A PE=1 SV=3                                                             | -0,026531847 | 0,258105 |
| P19823     | Inter-alpha-trypsin inhibitor heavy chain H2 OS=Homo sapiens OX=9606 GN=ITI2 PE=1 SV=2                             | -0,052768841 | 0,257649 |
| Q06190     | Serine/threonine-protein phosphatase 2A regulatory subunit B'' subunit alpha OS=Homo sapiens OX=9606 GN=PPP2R3A I  | 0,116144443  | 0,257477 |
| P09493     | Tropomyosin alpha-1 chain OS=Homo sapiens OX=9606 GN=TPM1 PE=1 SV=2                                                | 0,036239345  | 0,257396 |
| P07948     | Tyrosine-protein kinase Lyn OS=Homo sapiens OX=9606 GN=LYN PE=1 SV=3                                               | 0,118853458  | 0,256902 |
| Q14764     | Major vault protein OS=Homo sapiens OX=9606 GN=MVP PE=1 SV=4                                                       | -0,018074307 | 0,255769 |
| P23919     | Thymidylate kinase OS=Homo sapiens OX=9606 GN=DTYMK PE=1 SV=4                                                      | -0,032049653 | 0,255679 |
| Q15751     | Probable E3 ubiquitin-protein ligase HERC1 OS=Homo sapiens OX=9606 GN=HERC1 PE=1 SV=2                              | 0,109303812  | 0,254923 |
| Q9HB19     | Pleckstrin homology domain-containing family A member 2 OS=Homo sapiens OX=9606 GN=PLEKHA2 PE=1 SV=2               | -0,079525604 | 0,254463 |
| P46782     | 40S ribosomal protein S5 OS=Homo sapiens OX=9606 GN=RPS5 PE=1 SV=4                                                 | -0,031737223 | 0,252996 |
| Q9H9A5     | CCR4-NOT transcription complex subunit 10 OS=Homo sapiens OX=9606 GN=CNOT10 PE=1 SV=1                              | -0,057539936 | 0,252872 |
| Q9BSB4     | Autophagy-related protein 101 OS=Homo sapiens OX=9606 GN=ATG101 PE=1 SV=1                                          | 0,108420348  | 0,252766 |
| Q96EY1     | DnaJ homology subfamily A member 3, mitochondrial OS=Homo sapiens OX=9606 GN=DNAJA3 PE=1 SV=2                      | 0,065516991  | 0,252096 |
| Q13888     | General transcription factor IIH subunit 2 OS=Homo sapiens OX=9606 GN=GTTF2H2 PE=1 SV=1                            | -0,049653143 | 0,252004 |
| P35914     | Hydroxymethylglutaryl-CoA lyase, mitochondrial OS=Homo sapiens OX=9606 GN=HMGCL PE=1 SV=2                          | -0,10806943  | 0,251909 |
| Q765P7     | Protein MTSS 2 OS=Homo sapiens OX=9606 GN=MTSS2 PE=1 SV=1                                                          | -0,038990243 | 0,251037 |
| Q9NQC8     | Intraflagellar transport protein 46 homolog OS=Homo sapiens OX=9606 GN=IFT46 PE=1 SV=1                             | -0,107711194 | 0,251035 |
| Q9UBI6     | Guanine nucleotide-binding protein G(I)/G(S)/G(O) subunit gamma-12 OS=Homo sapiens OX=9606 GN=GNG12 PE=1 SV=3      | -0,057086093 | 0,250735 |
| Q8NEU8     | DCC-interacting protein 13-beta OS=Homo sapiens OX=9606 GN=APPL2 PE=1 SV=3                                         | -0,033853055 | 0,25026  |
| P42356     | Phosphatidylinositol 4-kinase alpha OS=Homo sapiens OX=9606 GN=PI4KA PE=1 SV=4                                     | -0,047096532 | 0,250004 |
| Q9HB40     | Retinoid-inducible serine carboxypeptidase OS=Homo sapiens OX=9606 GN=SCPEP1 PE=1 SV=1                             | -0,107002339 | 0,249305 |
| 000232     | 26S proteasome non-ATPase regulatory subunit 12 OS=Homo sapiens OX=9606 GN=PMSD12 PE=1 SV=3                        | 0,026307717  | 0,249262 |
| 043929     | Origin recognition complex subunit 4 OS=Homo sapiens OX=9606 GN=ORC4 PE=1 SV=2                                     | 0,046937682  | 0,249099 |
| Q9Y220     | Protein SGT1 homolog OS=Homo sapiens OX=9606 GN=SUGT1 PE=1 SV=3                                                    | 0,030246552  | 0,249053 |
| Q96DG6     | Carboxymethylenebutenolidase homolog OS=Homo sapiens OX=9606 GN=CMBL PE=1 SV=1                                     | 0,046929426  | 0,249052 |
| Q96CN7     | Isochorismatase domain-containing protein 1 OS=Homo sapiens OX=9606 GN=ISOC1 PE=1 SV=3                             | -0,077893632 | 0,248908 |
| Q9BSY9     | Deubiquitinase DESI2 OS=Homo sapiens OX=9606 GN=DESI2 PE=1 SV=1                                                    | 0,056356979  | 0,247307 |
| Q9NKR1     | Nuclear distribution protein nude homolog 1 OS=Homo sapiens OX=9606 GN=NDE1 PE=1 SV=3                              | 0,056326813  | 0,247165 |
| P27824     | Calnexin OS=Homo sapiens OX=9606 GN=CANX PE=1 SV=2                                                                 | -0,020109296 | 0,247149 |
| Q9H9Q4     | Non-homologous end-joining factor 1 OS=Homo sapiens OX=9606 GN=NHEJ1 PE=1 SV=1                                     | 0,10604625   | 0,246974 |
| 000762     | Ubiquitin-conjugating enzyme E2 C OS=Homo sapiens OX=9606 GN=UBE2C PE=1 SV=1                                       | -0,043169998 | 0,24624  |
| Q9Y5Q9     | General transcription factor 3C polypeptide 3 OS=Homo sapiens OX=9606 GN=GTFC3 PE=1 SV=1                           | -0,050569594 | 0,246144 |
| Q15057     | Arf-GAP with coiled-coil, ANK repeat and PH domain-containing protein 2 OS=Homo sapiens OX=9606 GN=ACAP2 PE=1 SV=1 | 0,056085586  | 0,246032 |
| Q9H013     | Disintegrin and metalloproteinase domain-containing protein 19 OS=Homo sapiens OX=9606 GN=ADAM19 PE=1 SV=3         | 0,091065291  | 0,245736 |
| Q9Y3M8     | StAR-related lipid transfer protein 13 OS=Homo sapiens OX=9606 GN=STARD13 PE=1 SV=2                                | -0,076957475 | 0,245727 |
| Q92542     | Nicastrin OS=Homo sapiens OX=9606 GN=NCSTN PE=1 SV=2                                                               | -0,040415472 | 0,245601 |
| Q92888     | Rho guanine nucleotide exchange factor 1 OS=Homo sapiens OX=9606 GN=ARHGEF1 PE=1 SV=2                              | 0,02237655   | 0,245369 |
| P61020     | Ras-related protein Rab-5B OS=Homo sapiens OX=9606 GN=RAB5B PE=1 SV=1                                              | -0,063830259 | 0,245166 |
| P24666     | Low molecular weight phosphotyrosine protein phosphatase OS=Homo sapiens OX=9606 GN=ACP1 PE=1 SV=3                 | 0,046080924  | 0,244226 |
| P30533     | Alpha-2-macroglobulin receptor-associated protein OS=Homo sapiens OX=9606 GN=LRPAP1 PE=1 SV=1                      | -0,033073917 | 0,244075 |
| P50148     | Guanine nucleotide-binding protein G(q) subunit alpha OS=Homo sapiens OX=9606 GN=GNAQ PE=1 SV=4                    | -0,034474052 | 0,243938 |
| P15531     | Nucleoside diphosphate kinase A OS=Homo sapiens OX=9606 GN=NME1 PE=1 SV=1                                          | -0,040156628 | 0,243913 |
| Q8NB59     | Thioredoxin domain-containing protein 5 OS=Homo sapiens OX=9606 GN=TXNDC5 PE=1 SV=2                                | -0,02639483  | 0,243495 |
| P26599     | Polypyrimidine tract-binding protein 1 OS=Homo sapiens OX=9606 GN=PTBP1 PE=1 SV=1                                  | -0,028682433 | 0,243311 |
| Q92508     | Piezo-type mechanosensitive ion channel component 1 OS=Homo sapiens OX=9606 GN=PIEZO1 PE=1 SV=4                    | -0,06329017  | 0,242951 |
| P14927     | Cytochrome b-c1 complex subunit 7 OS=Homo sapiens OX=9606 GN=UQCRCB PE=1 SV=2                                      | -0,05539752  | 0,242804 |
| P12081     | Histidine--tRNA ligase, cytoplasmic OS=Homo sapiens OX=9606 GN=HARS PE=1 SV=2                                      | 0,024494781  | 0,242721 |
| AOA0B4J2D5 | Glutamine amidotransferase-like class 1 domain-containing protein 3B, mitochondrial OS=Homo sapiens OX=9606 GN=GA  | -0,039882603 | 0,242128 |
| Q9P2D3     | HEAT repeat-containing protein 5B OS=Homo sapiens OX=9606 GN=HEATR5B PE=1 SV=2                                     | 0,055230531  | 0,242021 |
| P54105     | Methylosome subunit pICn OS=Homo sapiens OX=9606 GN=CLNS1A PE=1 SV=1                                               | 0,055202801  | 0,241891 |
| P62140     | Serine/threonine-protein phosphatase PP1-beta catalytic subunit OS=Homo sapiens OX=9606 GN=PPP1CB PE=1 SV=3        | 0,049590535  | 0,241044 |
| Q6IB50     | Twinfilin-2 OS=Homo sapiens OX=9606 GN=TFW2 PE=1 SV=2                                                              | -0,031261775 | 0,239499 |
| Q9UIX4     | Anaphase-promoting complex subunit 5 OS=Homo sapiens OX=9606 GN=ANAPC5 PE=1 SV=2                                   | -0,102929367 | 0,239382 |
| Q15059     | Bromodomain-containing protein 3 OS=Homo sapiens OX=9606 GN=BRD3 PE=1 SV=1                                         | 0,074939983  | 0,238886 |
| 060313     | Dynamamin-like 120 kDa protein, mitochondrial OS=Homo sapiens OX=9606 GN=OPA1 PE=1 SV=3                            | -0,019471786 | 0,238739 |
| P51553     | Iso citrate dehydrogenase [NAD] subunit gamma, mitochondrial OS=Homo sapiens OX=9606 GN=IDH3G PE=1 SV=1            | 0,04912215   | 0,238608 |
| 075127     | Pentatricopeptide repeat-containing protein 1, mitochondrial OS=Homo sapiens OX=9606 GN=PTCD1 PE=1 SV=2            | 0,102402034  | 0,238099 |
| P36873     | Serine/threonine-protein phosphatase PP1-gamma catalytic subunit OS=Homo sapiens OX=9606 GN=PPP1CC PE=1 SV=1       | -0,054157867 | 0,237    |
| P60709     | Actin, cytoplasmic 1 OS=Homo sapiens OX=9606 GN=ACTB PE=1 SV=1                                                     | 0,016620172  | 0,236454 |
| P00492     | Hypoxanthine-guanine phosphoribosyltransferase OS=Homo sapiens OX=9606 GN=HPRT1 PE=1 SV=2                          | 0,036839204  | 0,236206 |

|        |                                                                                                              |              |          |
|--------|--------------------------------------------------------------------------------------------------------------|--------------|----------|
| O60678 | Protein arginine N-methyltransferase 3 OS=Homo sapiens OX=9606 GN=PRMT3 PE=1 SV=4                            | -0,038902883 | 0,23576  |
| P63272 | Transcription elongation factor SPT4 OS=Homo sapiens OX=9606 GN=SUPT4H1 PE=1 SV=1                            | 0,073596395  | 0,234341 |
| Q9Y4F3 | Meiosis regulator and mRNA stability factor 1 OS=Homo sapiens OX=9606 GN=MARF1 PE=1 SV=6                     | -0,049355046 | 0,233959 |
| P20073 | Annexin A7 OS=Homo sapiens OX=9606 GN=ANXA7 PE=1 SV=3                                                        | -0,026027544 | 0,233161 |
| Q9UPN6 | SR-related and CTD-associated factor 8 OS=Homo sapiens OX=9606 GN=SCAF8 PE=1 SV=1                            | -0,047939008 | 0,232469 |
| Q04941 | Proteolipid protein 2 OS=Homo sapiens OX=9606 GN=PLP2 PE=1 SV=1                                              | 0,100040093  | 0,232356 |
| Q92499 | ATP-dependent RNA helicase DDX1 OS=Homo sapiens OX=9606 GN=DDX1 PE=1 SV=2                                    | -0,018449989 | 0,232248 |
| Q9BWJ5 | Splicing factor 3B subunit 5 OS=Homo sapiens OX=9606 GN=SF3B5 PE=1 SV=1                                      | 0,060613819  | 0,232011 |
| P48444 | Coatamer subunit delta OS=Homo sapiens OX=9606 GN=ARCN1 PE=1 SV=1                                            | -0,023478362 | 0,231932 |
| P05388 | 60S acidic ribosomal protein P0 OS=Homo sapiens OX=9606 GN=RPLP0 PE=1 SV=1                                   | -0,029258347 | 0,231843 |
| O95197 | Reticulon-3 OS=Homo sapiens OX=9606 GN=RTN3 PE=1 SV=2                                                        | -0,099650576 | 0,23141  |
| Q9BQE3 | Tubulin alpha-1C chain OS=Homo sapiens OX=9606 GN=TUBA1C PE=1 SV=1                                           | 0,032812301  | 0,231355 |
| P15954 | Cytochrome c oxidase subunit 7C, mitochondrial OS=Homo sapiens OX=9606 GN=COX7C PE=1 SV=1                    | -0,072650845 | 0,231147 |
| P47813 | #N/D                                                                                                         | 0,052690065  | 0,23015  |
| P35813 | Protein phosphatase 1A OS=Homo sapiens OX=9606 GN=PPM1A PE=1 SV=1                                            | -0,052611872 | 0,229786 |
| P82673 | 28S ribosomal protein S35, mitochondrial OS=Homo sapiens OX=9606 GN=MRPS35 PE=1 SV=1                         | 0,052488483  | 0,229211 |
| Q8WVCO | RNA polymerase-associated protein LEO1 OS=Homo sapiens OX=9606 GN=LEO1 PE=1 SV=1                             | 0,071867086  | 0,228504 |
| Q966K7 | Fumarylacetoacetate hydrolase domain-containing protein 2A OS=Homo sapiens OX=9606 GN=FAHD2A PE=1 SV=1       | -0,047081985 | 0,228034 |
| Q9UI83 | 2-Hydroxyacyl-CoA lyase 1 OS=Homo sapiens OX=9606 GN=HACL1 PE=1 SV=2                                         | 0,029258347  | 0,227725 |
| P31937 | 3-hydroxyisobutyrate dehydrogenase, mitochondrial OS=Homo sapiens OX=9606 GN=HIBADH PE=1 SV=2                | 0,035587707  | 0,227629 |
| P47985 | Cytochrome b-c1 complex subunit Rieske, mitochondrial OS=Homo sapiens OX=9606 GN=UQCRCF51 PE=1 SV=2          | -0,047128344 | 0,227355 |
| Q6I9Y2 | THO complex subunit 7 homolog OS=Homo sapiens OX=9606 GN=THOC7 PE=1 SV=3                                     | 0,0715027    | 0,227175 |
| Q96B54 | Zinc finger protein 428 OS=Homo sapiens OX=9606 GN=ZNF428 PE=1 SV=2                                          | -0,071259943 | 0,226458 |
| Q9UBB4 | Ataxin-10 OS=Homo sapiens OX=9606 GN=ATXN10 PE=1 SV=1                                                        | -0,033628819 | 0,226151 |
| Q8IXH7 | Negative elongation factor C/D OS=Homo sapiens OX=9606 GN=NELFCD PE=1 SV=2                                   | 0,042879373  | 0,22612  |
| P78356 | Phosphatidylinositol 5-phosphate 4-kinase type-2 beta OS=Homo sapiens OX=9606 GN=PIP4K2B PE=1 SV=1           | -0,097419361 | 0,225995 |
| Q32P44 | Echinoderm microtubule-associated protein-like 3 OS=Homo sapiens OX=9606 GN=EML3 PE=1 SV=1                   | -0,097032025 | 0,225055 |
| Q9UHR5 | SAP30-binding protein OS=Homo sapiens OX=9606 GN=SAP30BP PE=1 SV=1                                           | -0,05139278  | 0,224115 |
| Q96EM0 | Trans-3-hydroxy-L-proline dehydratase OS=Homo sapiens OX=9606 GN=L3HYPDH PE=1 SV=2                           | -0,096553839 | 0,223896 |
| Q8WU79 | Stromal membrane-associated protein 2 OS=Homo sapiens OX=9606 GN=SMAP2 PE=1 SV=1                             | -0,150237624 | 0,223803 |
| Q15528 | Mediator of RNA polymerase II transcription subunit 22 OS=Homo sapiens OX=9606 GN=MED22 PE=1 SV=2            | 0,096096389  | 0,222787 |
| O75781 | Paralemm-1 OS=Homo sapiens OX=9606 GN=PALM PE=1 SV=2                                                         | -0,033148811 | 0,222704 |
| Q5F1R6 | DnaI homolog subfamily C member 21 OS=Homo sapiens OX=9606 GN=DNAJC21 PE=1 SV=2                              | 0,058260896  | 0,22244  |
| Q8NDX5 | Polyhomoetic-like protein 3 OS=Homo sapiens OX=9606 GN=PHC3 PE=1 SV=1                                        | -0,070058828 | 0,222415 |
| Q9H1I8 | Activating signal cointegrator 1 complex subunit 2 OS=Homo sapiens OX=9606 GN=ASCC2 PE=1 SV=3                | 0,058167949  | 0,222063 |
| Q9BYM8 | RanBP-type and C3HC4-type zinc finger-containing protein 1 OS=Homo sapiens OX=9606 GN=RBCK1 PE=1 SV=2        | 0,095516473  | 0,221382 |
| Q8N4C8 | Misshapen-like kinase 1 OS=Homo sapiens OX=9606 GN=MINK1 PE=1 SV=2                                           | 0,045740391  | 0,221112 |
| Q96DA6 | Mitochondrial import inner membrane translocase subunit TIM14 OS=Homo sapiens OX=9606 GN=DNAJC19 PE=1 SV=3   | 0,187582937  | 0,22093  |
| Q9NVV8 | BRIS and BRCA1-A complex member 1 OS=Homo sapiens OX=9606 GN=BABAM1 PE=1 SV=1                                | -0,050702276 | 0,22091  |
| P23526 | Adenosylhomocysteinase OS=Homo sapiens OX=9606 GN=AHCY PE=1 SV=4                                             | -0,024087178 | 0,220763 |
| Q722W9 | 39S ribosomal protein L21, mitochondrial OS=Homo sapiens OX=9606 GN=MRPL21 PE=1 SV=2                         | 0,095126527  | 0,220438 |
| P28072 | Proteasome subunit beta type-6 OS=Homo sapiens OX=9606 GN=PSMB6 PE=1 SV=4                                    | -0,038862087 | 0,220051 |
| Q16795 | NADH dehydrogenase [ubiquinone] 1 alpha subcomplex subunit 9, mitochondrial OS=Homo sapiens OX=9606 GN=NDUFA | -0,038979679 | 0,219653 |
| P61970 | Nuclear transport factor 2 OS=Homo sapiens OX=9606 GN=NUTF2 PE=1 SV=1                                        | 0,050329488  | 0,219182 |
| Q9Y2R0 | Cytochrome c oxidase assembly factor 3 homolog, mitochondrial OS=Homo sapiens OX=9606 GN=COA3 PE=1 SV=1      | 0,094444137  | 0,218785 |
| Q8IWP9 | Coiled-coil domain-containing protein 28A OS=Homo sapiens OX=9606 GN=CCDC28A PE=1 SV=1                       | 0,094066052  | 0,21787  |
| Q9UPT5 | Exocyst complex component 7 OS=Homo sapiens OX=9606 GN=EXOC7 PE=1 SV=3                                       | 0,028541541  | 0,217275 |
| O75157 | TSC2 domain family protein 2 OS=Homo sapiens OX=9606 GN=TSC2D2 PE=1 SV=3                                     | -0,038440733 | 0,217035 |
| Q9NZJ4 | Sacsin OS=Homo sapiens OX=9606 GN=SACS PE=1 SV=2                                                             | -0,024994689 | 0,216725 |
| Q9BYT8 | Neurolysin, mitochondrial OS=Homo sapiens OX=9606 GN=NLN PE=1 SV=1                                           | -0,027349372 | 0,215715 |
| P03915 | NADH-ubiquinone oxidoreductase chain 5 OS=Homo sapiens OX=9606 GN=MT-ND5 PE=1 SV=2                           | -0,049544695 | 0,215549 |
| Q02978 | Mitochondrial 2-oxoglutarate/malate carrier protein OS=Homo sapiens OX=9606 GN=SLC25A11 PE=1 SV=3            | 0,032143592  | 0,215506 |
| Q86U86 | Protein polybromo 1 OS=Homo sapiens OX=9606 GN=PBRM1 PE=1 SV=1                                               | -0,076083682 | 0,215346 |
| O75531 | Barrier-to-autointegration factor OS=Homo sapiens OX=9606 GN=BANF1 PE=1 SV=1                                 | 0,044583162  | 0,215161 |
| Q96RL1 | BRCA1-A complex subunit RAP80 OS=Homo sapiens OX=9606 GN=UIMC1 PE=1 SV=2                                     | -0,135002968 | 0,215131 |
| Q9NV31 | U3 small nucleolar ribonucleoprotein protein IMP3 OS=Homo sapiens OX=9606 GN=IMP3 PE=1 SV=1                  | -0,092856231 | 0,214944 |
| Q9HG60 | 3'-5' RNA helicase YTHDC2 OS=Homo sapiens OX=9606 GN=YTHDC2 PE=1 SV=2                                        | 0,040839812  | 0,214674 |
| Q53FT3 | Protein Hikeshi OS=Homo sapiens OX=9606 GN=HIKESHI PE=1 SV=2                                                 | 0,049118422  | 0,213578 |
| Q8IYI6 | Exocyst complex component 8 OS=Homo sapiens OX=9606 GN=EXOC8 PE=1 SV=2                                       | 0,049108746  | 0,213533 |
| O00231 | 26S proteasome non-ATPase regulatory subunit 11 OS=Homo sapiens OX=9606 GN=PSMD11 PE=1 SV=3                  | 0,019981607  | 0,213086 |
| P63096 | Guanine nucleotide-binding protein G(i) subunit alpha-1 OS=Homo sapiens OX=9606 GN=GNAI1 PE=1 SV=2           | 0,067263814  | 0,213037 |
| Q9Y282 | Endoplasmic reticulum-Golgi intermediate compartment protein 3 OS=Homo sapiens OX=9606 GN=ERGIC3 PE=1 SV=1   | 0,055937855  | 0,213033 |
| O60333 | Kinesin-like protein KIF1B OS=Homo sapiens OX=9606 GN=KIF1B PE=1 SV=5                                        | -0,092028591 | 0,212943 |
| O75438 | NADH dehydrogenase [ubiquinone] 1 beta subcomplex subunit 1 OS=Homo sapiens OX=9606 GN=NDUFB1 PE=1 SV=1      | 0,067208116  | 0,21285  |
| Q9BTA9 | WW domain-containing adapter protein with coiled-coil OS=Homo sapiens OX=9606 GN=WAC PE=1 SV=3               | -0,067120483 | 0,212557 |
| Q8NB16 | Mixed lineage kinase domain-like protein OS=Homo sapiens OX=9606 GN=MLKL PE=1 SV=1                           | 0,091808912  | 0,212412 |
| O00391 | Sulfhydryl oxidase 1 OS=Homo sapiens OX=9606 GN=QSOX1 PE=1 SV=3                                              | 0,066701535  | 0,211155 |
| P09497 | Clathrin light chain B OS=Homo sapiens OX=9606 GN=CLTB PE=1 SV=1                                             | 0,037213568  | 0,210123 |
| Q9H4M3 | F-box only protein 44 OS=Homo sapiens OX=9606 GN=FBXO44 PE=1 SV=3                                            | -0,090620022 | 0,20954  |
| Q5PRF9 | Protein Smaug homolog 2 OS=Homo sapiens OX=9606 GN=SAMD4B PE=1 SV=1                                          | 0,04799269   | 0,208383 |
| O95785 | Protein Wiz OS=Homo sapiens OX=9606 GN=WIZ PE=1 SV=2                                                         | -0,089927136 | 0,207867 |
| Q9Y3Q8 | TSC2 domain family protein 4 OS=Homo sapiens OX=9606 GN=TSC2D4 PE=1 SV=2                                     | -0,065642516 | 0,207614 |
| Q9BTU6 | Phosphatidylinositol 4-kinase type 2-alpha OS=Homo sapiens OX=9606 GN=PI4K2A PE=1 SV=1                       | -0,031005764 | 0,207393 |
| Q9Y5Y2 | Cytosolic Fe-S cluster assembly factor NUBP2 OS=Homo sapiens OX=9606 GN=NUBP2 PE=1 SV=1                      | -0,03670947  | 0,207098 |
| Q8IZH2 | 5'-3' exoribonuclease 1 OS=Homo sapiens OX=9606 GN=XRN1 PE=1 SV=1                                            | -0,036699105 | 0,207036 |
| Q9Y4K4 | Mitogen-activated protein kinase kinase kinase 5 OS=Homo sapiens OX=9606 GN=MAP4K5 PE=1 SV=2                 | -0,089361931 | 0,206504 |
| O60673 | DNA polymerase zeta catalytic subunit OS=Homo sapiens OX=9606 GN=REV3L PE=1 SV=2                             | 0,089087106  | 0,205841 |
| P40261 | Nicotinamide N-methyltransferase OS=Homo sapiens OX=9606 GN=NMNMT PE=1 SV=1                                  | 0,034250998  | 0,205812 |
| Q02040 | A-kinase anchor protein 17A OS=Homo sapiens OX=9606 GN=AKAP17A PE=1 SV=2                                     | -0,054115524 | 0,205684 |
| Q7RTV5 | Peroxiredoxin-like 2C OS=Homo sapiens OX=9606 GN=PRXL2C PE=2 SV=1                                            | -0,096603549 | 0,205655 |
| Q96G28 | Cilia- and flagella-associated protein 36 OS=Homo sapiens OX=9606 GN=CFAP36 PE=1 SV=2                        | 0,032298645  | 0,205275 |
| Q9UFW8 | CGG triplet repeat-binding protein 1 OS=Homo sapiens OX=9606 GN=CGGBP1 PE=1 SV=2                             | -0,047258472 | 0,205003 |
| O43414 | ERI1 exoribonuclease 3 OS=Homo sapiens OX=9606 GN=ERI3 PE=1 SV=2                                             | -0,047200656 | 0,204737 |
| O43684 | Mitotic checkpoint protein BUB3 OS=Homo sapiens OX=9606 GN=BUB3 PE=1 SV=1                                    | -0,029133281 | 0,203796 |
| P56537 | Eukaryotic translation initiation factor 6 OS=Homo sapiens OX=9606 GN=EIF6 PE=1 SV=1                         | 0,033671766  | 0,202116 |
| Q9B295 | Histone-lysine N-methyltransferase NSD3 OS=Homo sapiens OX=9606 GN=NSD3 PE=1 SV=1                            | -0,063906291 | 0,201822 |
| O43598 | 2'-deoxynucleoside 5'-phosphate N-hydrolase 1 OS=Homo sapiens OX=9606 GN=DNPH1 PE=1 SV=1                     | -0,063511435 | 0,200506 |
| Q9UBV7 | Beta-1,4-galactosyltransferase 7 OS=Homo sapiens OX=9606 GN=B4GALT7 PE=1 SV=1                                | -0,086630183 | 0,19992  |
| Q8NET4 | Retrotransposon Gag-like protein 9 OS=Homo sapiens OX=9606 GN=RTL9 PE=1 SV=1                                 | -0,086485942 | 0,199573 |
| Q96F86 | Enhancer of mRNA-decapping protein 3 OS=Homo sapiens OX=9606 GN=EDC3 PE=1 SV=1                               | 0,045774394  | 0,198187 |
| Q9NVG8 | TBC1 domain family member 13 OS=Homo sapiens OX=9606 GN=TBC1D13 PE=1 SV=3                                    | -0,041249107 | 0,198117 |

|        |                                                                                                                                            |              |          |
|--------|--------------------------------------------------------------------------------------------------------------------------------------------|--------------|----------|
| Q9NUL5 | Repressor of yield of DENV protein OS=Homo sapiens OX=9606 GN=RYDEN PE=1 SV=2                                                              | -0,089670539 | 0,198028 |
| Q96CN9 | GRIP and coiled-coil domain-containing protein 1 OS=Homo sapiens OX=9606 GN=GCC1 PE=1 SV=1                                                 | 0,085656885  | 0,197578 |
| P50995 | Annexin A11 OS=Homo sapiens OX=9606 GN=ANXA11 PE=1 SV=1                                                                                    | -0,025174729 | 0,197514 |
| P80303 | Nucleobindin-2 OS=Homo sapiens OX=9606 GN=NUCB2 PE=1 SV=3                                                                                  | -0,023547398 | 0,197105 |
| Q9Y333 | U6 snRNA-associated Sm-like protein LSM2 OS=Homo sapiens OX=9606 GN=LSM2 PE=1 SV=1                                                         | -0,05191478  | 0,196844 |
| Q9NQW6 | Anillin OS=Homo sapiens OX=9606 GN=ANLN PE=1 SV=2                                                                                          | 0,017284089  | 0,196819 |
| O75909 | Cyclin-K OS=Homo sapiens OX=9606 GN=CCNK PE=1 SV=2                                                                                         | 0,051706513  | 0,196009 |
| Q96B97 | SH3 domain-containing kinase-binding protein 1 OS=Homo sapiens OX=9606 GN=SH3KBP1 PE=1 SV=2                                                | -0,02933564  | 0,195548 |
| Q9H5K3 | Protein O-mannose kinase OS=Homo sapiens OX=9606 GN=POMK PE=1 SV=1                                                                         | 0,084750313  | 0,195397 |
| Q5JTJ3 | Cytochrome c oxidase assembly factor 6 homolog OS=Homo sapiens OX=9606 GN=COA6 PE=1 SV=1                                                   | 0,08442723   | 0,194621 |
| Q9UHY1 | Nuclear receptor-binding protein OS=Homo sapiens OX=9606 GN=NRBP1 PE=1 SV=1                                                                | -0,034568655 | 0,194305 |
| P06132 | Uroporphyrinogen decarboxylase OS=Homo sapiens OX=9606 GN=UROD PE=1 SV=2                                                                   | -0,026545494 | 0,193044 |
| P11310 | Medium-chain specific acyl-CoA dehydrogenase, mitochondrial OS=Homo sapiens OX=9606 GN=ACADM PE=1 SV=1                                     | 0,040171137  | 0,19264  |
| Q6PIJ6 | F-box only protein 38 OS=Homo sapiens OX=9606 GN=FBXO38 PE=1 SV=3                                                                          | 0,083510542  | 0,192418 |
| Q9HG62 | WD repeat-containing protein 55 OS=Homo sapiens OX=9606 GN=WDR55 PE=1 SV=2                                                                 | -0,044147346 | 0,190743 |
| P67775 | Serine/threonine-protein phosphatase 2A catalytic subunit alpha isoform OS=Homo sapiens OX=9606 GN=PPP2CA PE=1 SV=1                        | -0,082779701 | 0,190663 |
| Q8WUY8 | N-acetyltransferase 14 OS=Homo sapiens OX=9606 GN=NAT14 PE=1 SV=1                                                                          | 0,082747467  | 0,190585 |
| Q16698 | 2,4-dienyl-CoA reductase, mitochondrial OS=Homo sapiens OX=9606 GN=DECR1 PE=1 SV=1                                                         | -0,036478968 | 0,190429 |
| Q13546 | Receptor-interacting serine/threonine-protein kinase 1 OS=Homo sapiens OX=9606 GN=RIPK1 PE=1 SV=3                                          | -0,036442354 | 0,190227 |
| P07741 | Adenine phosphoribosyltransferase OS=Homo sapiens OX=9606 GN=APRT PE=1 SV=2                                                                | -0,029992428 | 0,189761 |
| P55081 | Microfibrillar-associated protein 1 OS=Homo sapiens OX=9606 GN=MFA1 PE=1 SV=2                                                              | -0,039497285 | 0,189222 |
| Q7L2H7 | Eukaryotic translation initiation factor 3 subunit M OS=Homo sapiens OX=9606 GN=EIF3M PE=1 SV=1                                            | 0,024125167  | 0,188795 |
| P43487 | Ran-specific GTPase-activating protein OS=Homo sapiens OX=9606 GN=РАНBP1 PE=1 SV=1                                                         | -0,033591093 | 0,188492 |
| P62333 | 26S proteasome regulatory subunit 10B OS=Homo sapiens OX=9606 GN=PSMCG PE=1 SV=1                                                           | -0,021298128 | 0,188319 |
| P04049 | RAF proto-oncogene serine/threonine-protein kinase OS=Homo sapiens OX=9606 GN=RAF1 PE=1 SV=1                                               | -0,043527951 | 0,187916 |
| Q9NQK4 | Omega-amidase NIT2 OS=Homo sapiens OX=9606 GN=NIT2 PE=1 SV=1                                                                               | 0,024001025  | 0,187766 |
| Q15814 | Tubulin-specific chaperone C OS=Homo sapiens OX=9606 GN=TBCC PE=1 SV=2                                                                     | -0,043478145 | 0,187689 |
| O43310 | CBP80/20-dependent translation initiation factor OS=Homo sapiens OX=9606 GN=CTIF PE=1 SV=1                                                 | -0,043429842 | 0,187469 |
| Q8IY21 | Probable ATP-dependent RNA helicase DDX60 OS=Homo sapiens OX=9606 GN=DDX60 PE=1 SV=3                                                       | -0,219395188 | 0,187399 |
| Q53H96 | Pyroline-5-carboxylate reductase 3 OS=Homo sapiens OX=9606 GN=PYCR3 PE=1 SV=3                                                              | -0,081272267 | 0,187046 |
| P51946 | Cyclin-H OS=Homo sapiens OX=9606 GN=CCNH PE=1 SV=1                                                                                         | -0,059432018 | 0,186964 |
| P08574 | Cytochrome c1, heme protein, mitochondrial OS=Homo sapiens OX=9606 GN=CYC1 PE=1 SV=3                                                       | 0,029318232  | 0,185251 |
| Q5JRX3 | Presequence protease, mitochondrial OS=Homo sapiens OX=9606 GN=PITRM1 PE=1 SV=3                                                            | -0,018206214 | 0,185139 |
| Q53FA7 | Quinone oxidoreductase PIG3 OS=Homo sapiens OX=9606 GN=TP53I3 PE=1 SV=2                                                                    | 0,029241388  | 0,184737 |
| Q14165 | Malectin OS=Homo sapiens OX=9606 GN=MLEC PE=1 SV=1                                                                                         | -0,027787827 | 0,18464  |
| Q9BW92 | Threonine-tRNA ligase, mitochondrial OS=Homo sapiens OX=9606 GN=TARS2 PE=1 SV=1                                                            | -0,058682124 | 0,184481 |
| Q9BUB7 | Transmembrane protein 70, mitochondrial OS=Homo sapiens OX=9606 GN=TMEM70 PE=1 SV=2                                                        | -0,058656673 | 0,1844   |
| Q71UM5 | 40S ribosomal protein S27-like OS=Homo sapiens OX=9606 GN=RPS27L PE=1 SV=3                                                                 | -0,058648261 | 0,184372 |
| P51608 | Methyl-CpG-binding protein 2 OS=Homo sapiens OX=9606 GN=MECP2 PE=1 SV=1                                                                    | 0,08003758   | 0,184086 |
| O00139 | Kinesin-like protein KIF2A OS=Homo sapiens OX=9606 GN=KIF2A PE=1 SV=3                                                                      | -0,020816063 | 0,183811 |
| P60866 | 40S ribosomal protein S20 OS=Homo sapiens OX=9606 GN=RPS20 PE=1 SV=1                                                                       | -0,04836545  | 0,182669 |
| Q5RKY6 | Exosome complex component MTR3 OS=Homo sapiens OX=9606 GN=EXOSC6 PE=1 SV=1                                                                 | 0,048359146  | 0,182643 |
| O75821 | Eukaryotic translation initiation factor 3 subunit G OS=Homo sapiens OX=9606 GN=EIF3G PE=1 SV=2                                            | 0,022603126  | 0,182571 |
| Q8WTT2 | Nucleolar complex protein 3 homolog OS=Homo sapiens OX=9606 GN=NOC3L PE=1 SV=1                                                             | -0,034960755 | 0,182062 |
| Q86VM9 | Zinc finger CCHC domain-containing protein 18 OS=Homo sapiens OX=9606 GN=ZC3H18 PE=1 SV=2                                                  | -0,048149375 | 0,181809 |
| P0DJD0 | RANBP2-like and GRIP domain-containing protein 1 OS=Homo sapiens OX=9606 GN=RGPD1 PE=2 SV=1                                                | 0,021032194  | 0,180433 |
| Q9COE2 | Exportin-4 OS=Homo sapiens OX=9606 GN=XPO4 PE=1 SV=2                                                                                       | -0,037735207 | 0,180318 |
| Q92747 | SUN-related protein 2/3 complex subunit 1A OS=Homo sapiens OX=9606 GN=ARPC1A PE=2 SV=2                                                     | -0,02593121  | 0,180143 |
| O94901 | SUN domain-containing protein 1 OS=Homo sapiens OX=9606 GN=SUN1 PE=1 SV=3                                                                  | 0,024721033  | 0,179035 |
| O94826 | Mitochondrial import receptor subunit TOM70 OS=Homo sapiens OX=9606 GN=TOMM70 PE=1 SV=1                                                    | 0,019282163  | 0,179001 |
| Q96RP9 | Elongation factor G, mitochondrial OS=Homo sapiens OX=9606 GN=GFM1 PE=1 SV=2                                                               | -0,02146834  | 0,178727 |
| Q9NRH1 | Protein YAE1 homolog OS=Homo sapiens OX=9606 GN=YAE1 PE=1 SV=1                                                                             | 0,056891353  | 0,178574 |
| Q4VC05 | B-cell CLL/lymphoma 7 protein family member A OS=Homo sapiens OX=9606 GN=BCL7A PE=1 SV=1                                                   | -0,115460857 | 0,178484 |
| Q9BSL1 | Ubiquitin-associated domain-containing protein 1 OS=Homo sapiens OX=9606 GN=UBAC1 PE=1 SV=1                                                | -0,047285267 | 0,178375 |
| Q9NRL3 | Striatin-4 OS=Homo sapiens OX=9606 GN=STRN4 PE=1 SV=2                                                                                      | -0,077642398 | 0,178354 |
| Q9P0J7 | E3 ubiquitin-protein ligase KCMF1 OS=Homo sapiens OX=9606 GN=KCMF1 PE=1 SV=2                                                               | -0,04142057  | 0,178331 |
| Q92930 | Ras-related protein Rab-8B OS=Homo sapiens OX=9606 GN=RAB8B PE=1 SV=2                                                                      | 0,076956412  | 0,176714 |
| Q92889 | DNA repair endonuclease XPF OS=Homo sapiens OX=9606 GN=ERCC4 PE=1 SV=3                                                                     | 0,031160992  | 0,176435 |
| O14579 | Coatamer subunit epsilon OS=Homo sapiens OX=9606 GN=COPE PE=1 SV=3                                                                         | 0,023446195  | 0,17636  |
| Q8NE86 | Calcium uniporter protein, mitochondrial OS=Homo sapiens OX=9606 GN=MCU PE=1 SV=1                                                          | -0,056184346 | 0,176245 |
| Q8NF50 | Dedicator of cytokinesis protein 8 OS=Homo sapiens OX=9606 GN=DOCK8 PE=1 SV=3                                                              | -0,076652531 | 0,175988 |
| Q9HD45 | Transmembrane 9 superfamily member 3 OS=Homo sapiens OX=9606 GN=TM9SF3 PE=1 SV=2                                                           | 0,029520735  | 0,175847 |
| Q8N9T8 | Protein KRI1 homolog OS=Homo sapiens OX=9606 GN=KRI1 PE=1 SV=3                                                                             | -0,046632178 | 0,175783 |
| P30084 | Enoyl-CoA hydratase, mitochondrial OS=Homo sapiens OX=9606 GN=ECHS1 PE=1 SV=4                                                              | -0,027835483 | 0,175737 |
| P04183 | Thymidine kinase, cytosolic OS=Homo sapiens OX=9606 GN=TK1 PE=1 SV=2                                                                       | 0,031351913  | 0,175248 |
| P42336 | Phosphatidylinositol 4,5-bisphosphate 3-kinase catalytic subunit alpha isoform OS=Homo sapiens OX=9606 GN=PIK3CA PE=1 SV=1                 | -0,075655636 | 0,173607 |
| Q9BQA1 | Methylosome protein 50 OS=Homo sapiens OX=9606 GN=WDR77 PE=1 SV=1                                                                          | -0,029143774 | 0,17348  |
| Q96GM5 | SWI/SNF-related matrix-associated actin-dependent regulator of chromatin subfamily D member 1 OS=Homo sapiens OX=9606 GN=SMARCD1 PE=1 SV=1 | 0,040189612  | 0,172755 |
| Q13952 | Nuclear transcription factor Y subunit gamma OS=Homo sapiens OX=9606 GN=NFYC PE=1 SV=3                                                     | 0,055030002  | 0,172447 |
| Q96BY6 | Dedicator of cytokinesis protein 10 OS=Homo sapiens OX=9606 GN=DOCK10 PE=1 SV=3                                                            | -0,045743247 | 0,172262 |
| Q9P129 | Coiled-coil domain-containing protein 180 OS=Homo sapiens OX=9606 GN=CCDC180 PE=2 SV=3                                                     | -0,078415552 | 0,171909 |
| Q9H1B7 | Probable E3 ubiquitin-protein ligase IRF2BPL OS=Homo sapiens OX=9606 GN=IRF2BPL PE=1 SV=1                                                  | 0,074694416  | 0,171313 |
| Q9BZF1 | Oxyterol-binding protein-related protein 8 OS=Homo sapiens OX=9606 GN=OSBPL8 PE=1 SV=3                                                     | 0,022782243  | 0,171097 |
| Q969G6 | Riboflavin kinase OS=Homo sapiens OX=9606 GN=RFK PE=1 SV=2                                                                                 | 0,03977242   | 0,170869 |
| Q00341 | Vigilin OS=Homo sapiens OX=9606 GN=HDLBP PE=1 SV=2                                                                                         | -0,0118198   | 0,17014  |
| Q99873 | Protein arginine N-methyltransferase 1 OS=Homo sapiens OX=9606 GN=PRMT1 PE=1 SV=3                                                          | 0,018361125  | 0,169991 |
| Q8I273 | RNA pseudouridylylase synthase domain-containing protein 2 OS=Homo sapiens OX=9606 GN=RPUSD2 PE=1 SV=2                                     | -0,045088567 | 0,169672 |
| O75146 | Huntingtin-interacting protein 1-related protein OS=Homo sapiens OX=9606 GN=HIP1R PE=1 SV=2                                                | 0,073897906  | 0,169414 |
| Q9UHQ9 | NADH-cytochrome b5 reductase 1 OS=Homo sapiens OX=9606 GN=CYB5R1 PE=1 SV=1                                                                 | 0,025587862  | 0,169248 |
| Q8N556 | Actin filament-associated protein 1 OS=Homo sapiens OX=9606 GN=AFAP1 PE=1 SV=2                                                             | 0,039236023  | 0,168446 |
| Q5JTV8 | Torsin-1A-interacting protein 1 OS=Homo sapiens OX=9606 GN=TOR1AIP1 PE=1 SV=2                                                              | -0,021646521 | 0,168372 |
| P09012 | U1 small nuclear ribonucleoprotein A OS=Homo sapiens OX=9606 GN=SNRPA PE=1 SV=3                                                            | -0,032438928 | 0,168248 |
| Q03405 | Urokinase plasminogen activator surface receptor OS=Homo sapiens OX=9606 GN=PLAUR PE=1 SV=1                                                | -0,030156179 | 0,168215 |
| Q14689 | Disco-interacting protein 2 homolog A OS=Homo sapiens OX=9606 GN=DIP2A PE=1 SV=2                                                           | 0,117656139  | 0,168181 |
| O00560 | Syntenin-1 OS=Homo sapiens OX=9606 GN=SDCBP PE=1 SV=1                                                                                      | -0,032415002 | 0,168118 |
| Q9BRQ6 | MICOS complex subunit MIC25 OS=Homo sapiens OX=9606 GN=CHCHD6 PE=1 SV=1                                                                    | -0,073117266 | 0,167554 |
| Q5VZE5 | N-alpha-acetyltransferase 35, NatC auxiliary subunit OS=Homo sapiens OX=9606 GN=NAA35 PE=1 SV=1                                            | -0,053529239 | 0,167521 |
| O95297 | Myelin protein zero-like protein 1 OS=Homo sapiens OX=9606 GN=MPZL1 PE=1 SV=1                                                              | -0,044432901 | 0,167082 |
| Q9UHL4 | Dipeptidyl peptidase 2 OS=Homo sapiens OX=9606 GN=DPP7 PE=1 SV=3                                                                           | -0,025244617 | 0,166859 |
| P57076 | Cilia- and flagella-associated protein 298 OS=Homo sapiens OX=9606 GN=CFAP298 PE=1 SV=1                                                    | -0,053123663 | 0,166192 |
| Q9NUQ3 | Gamma-taxilin OS=Homo sapiens OX=9606 GN=TXLNG PE=1 SV=2                                                                                   | 0,032020161  | 0,165965 |

|         |                                                                                                                    |              |          |
|---------|--------------------------------------------------------------------------------------------------------------------|--------------|----------|
| Q13627  | Dual specificity tyrosine-phosphorylation-regulated kinase 1A OS=Homo sapiens OX=9606 GN=DYRK1A PE=1 SV=2          | 0,053028698  | 0,165881 |
| P07237  | Protein disulfide-isomerase OS=Homo sapiens OX=9606 GN=P4HB PE=1 SV=3                                              | -0,013582759 | 0,165315 |
| Q9NYP9  | Protein Mis18-alpha OS=Homo sapiens OX=9606 GN=MIS18A PE=1 SV=1                                                    | -0,071996275 | 0,164885 |
| P28370  | Probable global transcription activator SNF2L1 OS=Homo sapiens OX=9606 GN=SMARCA1 PE=1 SV=2                        | -0,027728601 | 0,164623 |
| Q6PJ69  | Tripartite motif-containing protein 65 OS=Homo sapiens OX=9606 GN=TRIM65 PE=1 SV=3                                 | -0,058193651 | 0,163927 |
| O60784  | Target of Myb protein 1 OS=Homo sapiens OX=9606 GN=TOM1 PE=1 SV=2                                                  | 0,043582791  | 0,163729 |
| Q96IH7  | Deubiquitinating protein VCIPI135 OS=Homo sapiens OX=9606 GN=VCIPI1 PE=1 SV=2                                      | 0,043395504  | 0,163559 |
| Q9UNN8  | Endothelial protein C receptor OS=Homo sapiens OX=9606 GN=PROCR PE=1 SV=1                                          | 0,071425778  | 0,163527 |
| Q96PU5  | E3 ubiquitin-protein ligase NEDD4-like OS=Homo sapiens OX=9606 GN=NEDD4L PE=1 SV=2                                 | -0,032025166 | 0,163436 |
| Q9Y2P8  | RNA 3'-terminal phosphate cyclase-like protein OS=Homo sapiens OX=9606 GN=RCL1 PE=1 SV=3                           | 0,043486784  | 0,163351 |
| O95835  | Serine/threonine-protein kinase LATS1 OS=Homo sapiens OX=9606 GN=LATS1 PE=1 SV=1                                   | -0,071346082 | 0,163338 |
| Q8IZ81  | ELMO domain-containing protein 2 OS=Homo sapiens OX=9606 GN=ELMOD2 PE=1 SV=1                                       | -0,052236935 | 0,163289 |
| O60716  | Catenin delta-1 OS=Homo sapiens OX=9606 GN=CTNND1 PE=1 SV=1                                                        | -0,012403483 | 0,163123 |
| P26583  | High mobility group protein B2 OS=Homo sapiens OX=9606 GN=HMGB2 PE=1 SV=2                                          | 0,027471743  | 0,163021 |
| Q13137  | Calcium-binding and coiled-coil domain-containing protein 2 OS=Homo sapiens OX=9606 GN=CALCOCO2 PE=1 SV=1          | -0,034237633 | 0,162771 |
| Q8NI27  | THO complex subunit 2 OS=Homo sapiens OX=9606 GN=THOC2 PE=1 SV=2                                                   | 0,029112475  | 0,162099 |
| P38646  | Stress-70 protein, mitochondrial OS=Homo sapiens OX=9606 GN=HSPA9 PE=1 SV=2                                        | -0,01277182  | 0,161708 |
| Q93052  | Lipoma-preferred partner OS=Homo sapiens OX=9606 GN=LPP PE=1 SV=1                                                  | 0,027228903  | 0,161507 |
| Q15836  | Vesicle-associated membrane protein 3 OS=Homo sapiens OX=9606 GN=VAMP3 PE=1 SV=3                                   | -0,037647951 | 0,161294 |
| Q9UQ80  | Proliferation-associated protein 2G4 OS=Homo sapiens OX=9606 GN=PA2G4 PE=1 SV=3                                    | -0,015609614 | 0,160764 |
| O95777  | U6 snRNA-associated Sm-like protein Lsm8 OS=Homo sapiens OX=9606 GN=Lsm8 PE=1 SV=3                                 | -0,042808687 | 0,160681 |
| P07108  | Acyl-CoA-binding protein OS=Homo sapiens OX=9606 GN=DBI PE=1 SV=2                                                  | 0,037504352  | 0,160648 |
| Q8NB16  | Xyloside xylosyltransferase 1 OS=Homo sapiens OX=9606 GN=XYLT1 PE=1 SV=1                                           | -0,042781626 | 0,160575 |
| Q15067  | Peroxisomal acyl-coenzyme A oxidase 1 OS=Homo sapiens OX=9606 GN=ACOX1 PE=1 SV=3                                   | 0,022219892  | 0,160009 |
| P62328  | Thymosin beta-4 OS=Homo sapiens OX=9606 GN=TMSB4X PE=1 SV=2                                                        | 0,030915678  | 0,159956 |
| O15144  | Actin-related protein 2/3 complex subunit 2 OS=Homo sapiens OX=9606 GN=ARPC2 PE=1 SV=1                             | 0,017724979  | 0,159535 |
| Q5XKP0  | MICOS complex subunit MIC13 OS=Homo sapiens OX=9606 GN=MICOS13 PE=1 SV=1                                           | -0,069714741 | 0,15946  |
| P57018  | tRNA (guanine-N(7)-)-methyltransferase non-catalytic subunit WDR4 OS=Homo sapiens OX=9606 GN=WDR4 PE=1 SV=2        | -0,069267797 | 0,158399 |
| P21359  | Neurofibromin OS=Homo sapiens OX=9606 GN=NF1 PE=1 SV=2                                                             | -0,022915966 | 0,158154 |
| Q9Y2D5  | A-kinase anchor protein 2 OS=Homo sapiens OX=9606 GN=AKAP2 PE=1 SV=3                                               | 0,0185172    | 0,157778 |
| Q8TE73  | Dynein heavy chain 5, axonemal OS=Homo sapiens OX=9606 GN=DNAH5 PE=1 SV=3                                          | 0,068950654  | 0,157646 |
| Q8TC12  | Retinol dehydrogenase 11 OS=Homo sapiens OX=9606 GN=RDH11 PE=1 SV=2                                                | 0,036698945  | 0,157033 |
| P36954  | DNA-directed RNA polymerase II subunit RPB9 OS=Homo sapiens OX=9606 GN=POLR2I PE=1 SV=1                            | 0,068595363  | 0,156803 |
| Q9Y2V2  | Calcium-regulated heat-stable protein 1 OS=Homo sapiens OX=9606 GN=CARHSP1 PE=1 SV=2                               | -0,036480523 | 0,156053 |
| Q14185  | Dedicator of cytokinesis protein 1 OS=Homo sapiens OX=9606 GN=DOCK1 PE=1 SV=2                                      | 0,036445929  | 0,155898 |
| O60885  | Bromodomain-containing protein 4 OS=Homo sapiens OX=9606 GN=BRD4 PE=1 SV=2                                         | 0,068192397  | 0,155847 |
| Q9Y619  | TAF6-like RNA polymerase II p300/CBP-associated factor-associated factor 65 kDa subunit 6L OS=Homo sapiens OX=9606 | -0,068118854 | 0,155672 |
| O76071  | Probable cytosolic iron-sulfur protein assembly protein CIAO1 OS=Homo sapiens OX=9606 GN=CIAO1 PE=1 SV=1           | 0,036379772  | 0,155602 |
| O00566  | U3 small nucleolar ribonucleoprotein protein MPP10 OS=Homo sapiens OX=9606 GN=MPP10 PE=1 SV=2                      | 0,067681264  | 0,154634 |
| P21912  | Succinate dehydrogenase [ubiquinone] iron-sulfur subunit, mitochondrial OS=Homo sapiens OX=9606 GN=SDHB PE=1 SV=   | -0,029925394 | 0,154585 |
| Q8TB03  | Uncharacterized protein CXorf38 OS=Homo sapiens OX=9606 GN=CXorf38 PE=1 SV=1                                       | 0,053692341  | 0,154267 |
| Q9Y4P1  | Cysteine protease ATG4B OS=Homo sapiens OX=9606 GN=ATG4B PE=1 SV=2                                                 | -0,029847944 | 0,154166 |
| O95376  | E3 ubiquitin-protein ligase ARIH2 OS=Homo sapiens OX=9606 GN=ARIH2 PE=1 SV=1                                       | 0,025187748  | 0,154052 |
| O94829  | Importin-13 OS=Homo sapiens OX=9606 GN=IPO13 PE=1 SV=3                                                             | -0,067396598 | 0,15396  |
| O95084  | Serine protease 23 OS=Homo sapiens OX=9606 GN=PRSS23 PE=1 SV=1                                                     | -0,049289901 | 0,153669 |
| O75356  | Ectonucleoside triphosphate diphosphohydrolase 5 OS=Homo sapiens OX=9606 GN=ENTPD5 PE=1 SV=1                       | -0,220740426 | 0,153499 |
| Q9BR61  | Acyl-CoA-binding domain-containing protein 6 OS=Homo sapiens OX=9606 GN=ACBD6 PE=1 SV=1                            | 0,032356759  | 0,153404 |
| Q2P211  | Probable C-mannosyltransferase DPY19L1 OS=Homo sapiens OX=9606 GN=DPY19L1 PE=2 SV=1                                | -0,040941039 | 0,153348 |
| Q9H1H9  | Kinesin-like protein KIF13A OS=Homo sapiens OX=9606 GN=KIF13A PE=1 SV=2                                            | -0,049177771 | 0,153304 |
| P61158  | Actin-related protein 3 OS=Homo sapiens OX=9606 GN=ACTR3 PE=1 SV=3                                                 | 0,016612881  | 0,153017 |
| Q13015  | Protein AF1q OS=Homo sapiens OX=9606 GN=MLLT1 PE=1 SV=1                                                            | -0,049024193 | 0,152804 |
| Q9UKK9  | ADP-sugar pyrophosphatase OS=Homo sapiens OX=9606 GN=NUDT5 PE=1 SV=1                                               | 0,025760651  | 0,15238  |
| P55084  | Trifunctional enzyme subunit beta, mitochondrial OS=Homo sapiens OX=9606 GN=HADHB PE=1 SV=3                        | -0,016488533 | 0,151816 |
| Q13838  | Spliceosome RNA helicase DDX39B OS=Homo sapiens OX=9606 GN=DDX39B PE=1 SV=1                                        | 0,022037568  | 0,1518   |
| P21796  | Voltage-dependent anion-selective channel protein 1 OS=Homo sapiens OX=9606 GN=VDAC1 PE=1 SV=2                     | 0,018372077  | 0,151711 |
| Q9NXE4  | Sphingomyelin phosphodiesterase 4 OS=Homo sapiens OX=9606 GN=SMPD4 PE=1 SV=3                                       | 0,029363463  | 0,151545 |
| Q5T447  | E3 ubiquitin-protein ligase HECTD3 OS=Homo sapiens OX=9606 GN=HECTD3 PE=1 SV=1                                     | 0,035439281  | 0,151392 |
| P98160  | Basement membrane-specific heparan sulfate proteoglycan core protein OS=Homo sapiens OX=9606 GN=HSPG2 PE=1 SV      | 0,048442661  | 0,150913 |
| P84085  | ADP-ribosylation factor 5 OS=Homo sapiens OX=9606 GN=ARF5 PE=1 SV=2                                                | 0,034979939  | 0,14934  |
| Q66PJ3  | ADP-ribosylation factor-like protein 6-interacting protein 4 OS=Homo sapiens OX=9606 GN=ARL6IP4 PE=1 SV=2          | -0,039888533 | 0,149228 |
| Q49A26  | Putative oxidoreductase GLYR1 OS=Homo sapiens OX=9606 GN=GLYR1 PE=1 SV=4                                           | 0,031377211  | 0,148545 |
| Q00765  | Receptor expression-enhancing protein 5 OS=Homo sapiens OX=9606 GN=REEP5 PE=1 SV=3                                 | 0,031309433  | 0,14821  |
| Q9H7Z6  | Histone acetyltransferase KAT8 OS=Homo sapiens OX=9606 GN=KAT8 PE=1 SV=2                                           | 0,064822051  | 0,147864 |
| Q8WXA9  | Splicing regulatory glutamine/lysine-rich protein 1 OS=Homo sapiens OX=9606 GN=SREK1 PE=1 SV=1                     | -0,034575083 | 0,147532 |
| Q9HC16  | RNA c-diU editing enzyme APOBEC-3G OS=Homo sapiens OX=9606 GN=APOBEC3G PE=1 SV=1                                   | -0,015197581 | 0,14696  |
| Q9UJH6  | Sedoheptulokinase OS=Homo sapiens OX=9606 GN=SHPK PE=1 SV=3                                                        | -0,023513372 | 0,146882 |
| Q9BY77  | Polymerase delta-interacting protein 3 OS=Homo sapiens OX=9606 GN=PODIP3 PE=1 SV=2                                 | 0,026435683  | 0,146509 |
| O60674  | Serine/threonine kinase JAK2 OS=Homo sapiens OX=9606 GN=JAK2 PE=1 SV=2                                             | 0,149225057  | 0,146473 |
| Q9Y3C6  | Peptidyl-prolyl cis-trans isomerase-like 1 OS=Homo sapiens OX=9606 GN=PP1L1 PE=1 SV=1                              | -0,034232894 | 0,146006 |
| Q6ZVM7  | TOM1-like protein 2 OS=Homo sapiens OX=9606 GN=TOM1L2 PE=1 SV=1                                                    | -0,030805603 | 0,145716 |
| Q6ZM10  | Protein phosphatase 1 regulatory subunit 21 OS=Homo sapiens OX=9606 GN=PPP1R21 PE=1 SV=1                           | -0,063254979 | 0,144611 |
| Q12906  | Interleukin enhancer-binding factor 3 OS=Homo sapiens OX=9606 GN=ILF3 PE=1 SV=3                                    | -0,01263057  | 0,143853 |
| Q01968  | Inositol polyphosphate 5-phosphatase OCRL-1 OS=Homo sapiens OX=9606 GN=OCRL PE=1 SV=3                              | -0,03849121  | 0,143772 |
| P30048  | Thioredoxin-dependent peroxide reductase, mitochondrial OS=Homo sapiens OX=9606 GN=PRDX3 PE=1 SV=3                 | -0,025949964 | 0,143695 |
| Q4V328  | GRIP1-associated protein 1 OS=Homo sapiens OX=9606 GN=GRIPAP1 PE=1 SV=2                                            | 0,025912277  | 0,143476 |
| Q96EY8  | Corrinoid adenosyltransferase OS=Homo sapiens OX=9606 GN=MMAB PE=1 SV=1                                            | 0,062861509  | 0,143232 |
| Q9BXW7  | Haloacid dehalogenase-like hydrolase domain-containing 5 OS=Homo sapiens OX=9606 GN=HHDH5 PE=1 SV=1                | -0,046009865 | 0,143018 |
| Q07889  | Son of sevenless homolog 1 OS=Homo sapiens OX=9606 GN=SOS1 PE=1 SV=1                                               | -0,042343763 | 0,142732 |
| Q8WYA6  | Beta-catenin-like protein 1 OS=Homo sapiens OX=9606 GN=CTNBL1 PE=1 SV=1                                            | 0,025755261  | 0,142568 |
| P53350  | Serine/threonine-protein kinase PLK1 OS=Homo sapiens OX=9606 GN=PLK1 PE=1 SV=1                                     | -0,062548616 | 0,142494 |
| Q5MZN26 | WD repeat domain phosphoinositide-interacting protein 3 OS=Homo sapiens OX=9606 GN=WDR45B PE=1 SV=2                | -0,062453902 | 0,14227  |
| Q6UX04  | Spliceosome-associated protein CWC27 homolog OS=Homo sapiens OX=9606 GN=CWC27 PE=1 SV=1                            | -0,062371314 | 0,142076 |
| P20338  | Serine-threonine protein Rab-4A OS=Homo sapiens OX=9606 GN=RAB4A PE=1 SV=3                                         | -0,045634642 | 0,141803 |
| Q15061  | WD repeat-containing protein 43 OS=Homo sapiens OX=9606 GN=WDR43 PE=1 SV=3                                         | 0,027535309  | 0,14169  |
| P14406  | Cytochrome c oxidase subunit 7A2, mitochondrial OS=Homo sapiens OX=9606 GN=COX7A2 PE=1 SV=1                        | -0,061984922 | 0,141164 |
| Q5BJH7  | Protein YIF1B OS=Homo sapiens OX=9606 GN=YIF1B PE=1 SV=1                                                           | -0,033087889 | 0,14091  |
| P62861  | 40S ribosomal protein S30 OS=Homo sapiens OX=9606 GN=FAU PE=1 SV=1                                                 | 0,045344992  | 0,140866 |
| P20936  | Ras GTPase-activating protein 1 OS=Homo sapiens OX=9606 GN=RASA1 PE=1 SV=1                                         | -0,032985218 | 0,140454 |
| Q12955  | Ankyrin-3 OS=Homo sapiens OX=9606 GN=ANK3 PE=1 SV=3                                                                | 0,045085289  | 0,140026 |
| P23378  | Glycine dehydrogenase (decarboxylating), mitochondrial OS=Homo sapiens OX=9606 GN=GLDC PE=1 SV=2                   | -0,065156734 | 0,140021 |
| P50895  | Basal cell adhesion molecule OS=Homo sapiens OX=9606 GN=BCAM PE=1 SV=2                                             | 0,044998181  | 0,139744 |

|        |                                                                                                                 |              |          |
|--------|-----------------------------------------------------------------------------------------------------------------|--------------|----------|
| P68402 | Platelet-activating factor acetylhydrolase IB subunit beta OS=Homo sapiens OX=9606 GN=PAFAH1B2 PE=1 SV=1        | 0,027066931  | 0,139174 |
| P50395 | Rab GDP dissociation inhibitor beta OS=Homo sapiens OX=9606 GN=GDI2 PE=1 SV=2                                   | 0,014169031  | 0,139156 |
| Q92828 | Coronin-2A OS=Homo sapiens OX=9606 GN=CORO2A PE=1 SV=2                                                          | 0,061002862  | 0,138849 |
| P35606 | Coatomer subunit beta' OS=Homo sapiens OX=9606 GN=COPB2 PE=1 SV=2                                               | 0,011288015  | 0,138155 |
| Q9NUQ7 | Ufm1-specific protease 2 OS=Homo sapiens OX=9606 GN=UFSF2 PE=1 SV=3                                             | -0,023421687 | 0,13794  |
| O60231 | Pre-mRNA-splicing factor ATP-dependent RNA helicase DHX16 OS=Homo sapiens OX=9606 GN=DHX16 PE=1 SV=2            | -0,032416305 | 0,137927 |
| Q9Y487 | V-type proton ATPase 116 kDa subunit a isoform 2 OS=Homo sapiens OX=9606 GN=ATP6V0A2 PE=1 SV=2                  | -0,036834279 | 0,137324 |
| O14561 | Acyl carrier protein, mitochondrial OS=Homo sapiens OX=9606 GN=NDUFAB1 PE=1 SV=3                                | -0,044086709 | 0,136799 |
| Q86UY8 | 5'-nucleotidase domain-containing protein 3 OS=Homo sapiens OX=9606 GN=NT5DC3 PE=1 SV=1                         | 0,035386021  | 0,136354 |
| Q6P158 | Putative ATP-dependent RNA helicase DHX57 OS=Homo sapiens OX=9606 GN=DHX57 PE=1 SV=2                            | -0,03204322  | 0,136273 |
| Q86X53 | Glutamate-rich protein 1 OS=Homo sapiens OX=9606 GN=ERICH1 PE=1 SV=1                                            | 0,031333238  | 0,136201 |
| O95391 | Pre-mRNA-splicing factor SLU7 OS=Homo sapiens OX=9606 GN=SLU7 PE=1 SV=2                                         | -0,059791842 | 0,135997 |
| Q08379 | Golgin subfamily A member 2 OS=Homo sapiens OX=9606 GN=GOLGA2 PE=1 SV=3                                         | 0,016370927  | 0,134474 |
| Q96ER3 | Protein SAAL1 OS=Homo sapiens OX=9606 GN=SAAL1 PE=1 SV=2                                                        | -0,020405078 | 0,133516 |
| P61163 | Alpha-centractin OS=Homo sapiens OX=9606 GN=ACTR1A PE=1 SV=1                                                    | 0,014905157  | 0,133072 |
| O14497 | AT-rich interactive domain-containing protein 1A OS=Homo sapiens OX=9606 GN=ARID1A PE=1 SV=3                    | 0,035581059  | 0,132462 |
| Q8IUR7 | Armadillo repeat-containing protein 8 OS=Homo sapiens OX=9606 GN=ARMC8 PE=1 SV=2                                | 0,028018076  | 0,131985 |
| O60921 | Checkpoint protein HUS1 OS=Homo sapiens OX=9606 GN=HUS1 PE=1 SV=1                                               | -0,024766285 | 0,13196  |
| P58335 | Anthrax toxin receptor 2 OS=Homo sapiens OX=9606 GN=ANTXR2 PE=1 SV=5                                            | -0,035396786 | 0,131748 |
| Q7LGC8 | Carbohydrate sulfotransferase 3 OS=Homo sapiens OX=9606 GN=CHST3 PE=1 SV=3                                      | 0,042518415  | 0,131743 |
| P04899 | Guanine nucleotide-binding protein G(i) subunit alpha-2 OS=Homo sapiens OX=9606 GN=GNAI2 PE=1 SV=3              | -0,014388025 | 0,131657 |
| Q14651 | #N/D                                                                                                            | 0,035314529  | 0,131343 |
| Q9H267 | Vacuolar protein sorting-associated protein 33B OS=Homo sapiens OX=9606 GN=VPS33B PE=1 SV=2                     | 0,030878212  | 0,131115 |
| P18074 | General transcription and DNA repair factor IIH helicase subunit XPD OS=Homo sapiens OX=9606 GN=ERCC2 PE=1 SV=1 | 0,03523319   | 0,131115 |
| Q9Y4Y9 | U6 snRNA-associated Sm-like protein Lsm5 OS=Homo sapiens OX=9606 GN=LMS5 PE=1 SV=3                              | 0,057701186  | 0,131082 |
| Q6F5E8 | Capping protein, Arp2/3 and myosin-I linker protein 2 OS=Homo sapiens OX=9606 GN=CARMIL2 PE=1 SV=2              | 0,030852947  | 0,131004 |
| Q8WUM0 | Nuclear pore complex protein Nup133 OS=Homo sapiens OX=9606 GN=NUP133 PE=1 SV=2                                 | 0,012339576  | 0,130773 |
| Q9UNH6 | Sorting nexin-7 OS=Homo sapiens OX=9606 GN=SNX7 PE=1 SV=1                                                       | -0,057352434 | 0,130263 |
| P49720 | Proteasome subunit beta type-3 OS=Homo sapiens OX=9606 GN=PSMB3 PE=1 SV=2                                       | 0,022087475  | 0,129757 |
| Q9BRJ2 | 39S ribosomal protein L45, mitochondrial OS=Homo sapiens OX=9606 GN=MRPL45 PE=1 SV=2                            | -0,02755009  | 0,12969  |
| Q99961 | Endophilin-A2 OS=Homo sapiens OX=9606 GN=SH3GL1 PE=1 SV=1                                                       | 0,018935786  | 0,12955  |
| Q5VT52 | Regulation of nuclear pre-mRNA domain-containing protein 2 OS=Homo sapiens OX=9606 GN=RPRD2 PE=1 SV=1           | -0,022037824 | 0,129454 |
| O00159 | Unconventional myosin-Ic OS=Homo sapiens OX=9606 GN=MYO1C PE=1 SV=4                                             | -0,00083051  | 0,129275 |
| Q9H269 | Vacuolar protein sorting-associated protein 16 homolog OS=Homo sapiens OX=9606 GN=VPS16 PE=1 SV=2               | 0,023372619  | 0,128839 |
| Q9HOR6 | Glutamyl-tRNA(Gln) amidotransferase subunit A, mitochondrial OS=Homo sapiens OX=9606 GN=QRSL1 PE=1 SV=2         | 0,056517347  | 0,128303 |
| P42785 | Lysosomal Pro-X carboxypeptidase OS=Homo sapiens OX=9606 GN=PRCP PE=1 SV=1                                      | 0,027109277  | 0,127531 |
| P99999 | Cytochrome c OS=Homo sapiens OX=9606 GN=CYCS PE=1 SV=2                                                          | -0,023107816 | 0,12732  |
| Q9Y4W6 | AFG3-like protein 2 OS=Homo sapiens OX=9606 GN=AFG3L2 PE=1 SV=2                                                 | -0,016017728 | 0,127224 |
| Q15434 | RNA-binding motif, single-stranded-interacting protein 2 OS=Homo sapiens OX=9606 GN=RBMS2 PE=1 SV=1             | 0,041087773  | 0,127143 |
| O14613 | Cdc42 effector protein 2 OS=Homo sapiens OX=9606 GN=CDC42EP2 PE=1 SV=1                                          | -0,040873533 | 0,126455 |
| Q9BW60 | Elongation of very long chain fatty acids protein 1 OS=Homo sapiens OX=9606 GN=ELOVL1 PE=1 SV=1                 | -0,055041054 | 0,124842 |
| P61964 | WD repeat-containing protein 5 OS=Homo sapiens OX=9606 GN=WDR5 PE=1 SV=1                                        | -0,026425012 | 0,124186 |
| Q9UM00 | Calcium load-activated calcium channel OS=Homo sapiens OX=9606 GN=TMCO1 PE=1 SV=2                               | -0,040076466 | 0,123897 |
| Q5BKZ1 | DBIRD complex subunit ZNF326 OS=Homo sapiens OX=9606 GN=ZNF326 PE=1 SV=2                                        | -0,026288951 | 0,123521 |
| O60271 | C-Jun-amino-terminal kinase-interacting protein 4 OS=Homo sapiens OX=9606 GN=SPAG9 PE=1 SV=4                    | -0,011374361 | 0,122398 |
| Q9HCE1 | Helicase MOV-10 OS=Homo sapiens OX=9606 GN=MOV10 PE=1 SV=2                                                      | -0,016521492 | 0,122243 |
| P30050 | 60S ribosomal protein L12 OS=Homo sapiens OX=9606 GN=RPL12 PE=1 SV=1                                            | -0,019662651 | 0,12189  |
| Q9NX14 | NADH dehydrogenase [ubiquinone] 1 beta subcomplex subunit 11, mitochondrial OS=Homo sapiens OX=9606 GN=NDUFB    | -0,014952009 | 0,121291 |
| O75674 | TOM1-like protein 1 OS=Homo sapiens OX=9606 GN=TOM1L1 PE=1 SV=2                                                 | 0,032676822  | 0,121245 |
| Q8IVF7 | #N/D                                                                                                            | 0,053411987  | 0,121029 |
| P84090 | Enhancer of rudimentary homolog OS=Homo sapiens OX=9606 GN=ERH PE=1 SV=1                                        | 0,053410329  | 0,121025 |
| Q6NW29 | RWD domain-containing protein 4 OS=Homo sapiens OX=9606 GN=RWDD4 PE=1 SV=3                                      | -0,052997947 | 0,120061 |
| Q99549 | M-phase phosphoprotein 8 OS=Homo sapiens OX=9606 GN=MPHOSPH8 PE=1 SV=2                                          | 0,052808602  | 0,119618 |
| O75477 | Erlin-1 OS=Homo sapiens OX=9606 GN=ERLIN1 PE=1 SV=2                                                             | -0,019304017 | 0,119581 |
| O14939 | Phospholipase D2 OS=Homo sapiens OX=9606 GN=PLD2 PE=1 SV=2                                                      | 0,026290818  | 0,119408 |
| Q9H3P2 | Negative elongation factor A OS=Homo sapiens OX=9606 GN=NELFA PE=1 SV=3                                         | 0,023314287  | 0,119148 |
| P25789 | Proteasome subunit alpha type-4 OS=Homo sapiens OX=9606 GN=PSMA4 PE=1 SV=1                                      | 0,018270919  | 0,119017 |
| Q7Z4H7 | HAUS augmin-like complex subunit 6 OS=Homo sapiens OX=9606 GN=HAUS6 PE=1 SV=2                                   | 0,0280709    | 0,11875  |
| Q8IUW5 | REL1-like protein 1 OS=Homo sapiens OX=9606 GN=RELL1 PE=1 SV=1                                                  | -0,052205735 | 0,118121 |
| P06748 | Nucleophosmin OS=Homo sapiens OX=9606 GN=NPM1 PE=1 SV=2                                                         | 0,015939143  | 0,11777  |
| Q9UPU5 | Ubiquitin carboxyl-terminal hydrolase 24 OS=Homo sapiens OX=9606 GN=USP24 PE=1 SV=3                             | -0,031731086 | 0,117608 |
| Q6YN16 | Hydroxysteroid dehydrogenase-like protein 2 OS=Homo sapiens OX=9606 GN=HSDL2 PE=1 SV=1                          | -0,031654037 | 0,117312 |
| Q7LSN7 | Lysophosphatidylcholine acyltransferase 2 OS=Homo sapiens OX=9606 GN=LPCAT2 PE=1 SV=1                           | -0,021239975 | 0,116612 |
| P49902 | Cytosolic purine 5'-nucleotidase OS=Homo sapiens OX=9606 GN=NT5C2 PE=1 SV=1                                     | 0,01472359   | 0,116557 |
| P78332 | RNA-binding protein 6 OS=Homo sapiens OX=9606 GN=RBM6 PE=1 SV=5                                                 | 0,052915531  | 0,116479 |
| Q8NI38 | NF-kappa-B inhibitor delta OS=Homo sapiens OX=9606 GN=NFKBID PE=1 SV=1                                          | 0,037656619  | 0,116192 |
| Q13332 | Receptor-type tyrosine-protein phosphatase 5 OS=Homo sapiens OX=9606 GN=PTPRS PE=1 SV=3                         | -0,051233914 | 0,115941 |
| Q9BSV6 | tRNA-splicing endonuclease subunit Sen34 OS=Homo sapiens OX=9606 GN=TSEN34 PE=1 SV=1                            | -0,021057717 | 0,115606 |
| P23510 | Tumor necrosis factor ligand superfamily member 4 OS=Homo sapiens OX=9606 GN=TNFSF4 PE=1 SV=1                   | 0,031166314  | 0,115439 |
| Q96GQ5 | RUS1 family protein C16orf58 OS=Homo sapiens OX=9606 GN=C16orf58 PE=1 SV=2                                      | 0,031012985  | 0,114851 |
| P13995 | Bifunctional methylenetetrahydrofolate dehydrogenase/cyclohydrolase, mitochondrial OS=Homo sapiens OX=9606 GN=  | -0,022294212 | 0,113745 |
| Q96JY6 | PDZ and LIM domain protein 2 OS=Homo sapiens OX=9606 GN=PDLIM2 PE=1 SV=1                                        | 0,026922564  | 0,113718 |
| Q12792 | Twinfilin-1 OS=Homo sapiens OX=9606 GN=TFW1 PE=1 SV=3                                                           | -0,01345747  | 0,113097 |
| P63173 | 60S ribosomal protein L38 OS=Homo sapiens OX=9606 GN=RPL38 PE=1 SV=2                                            | 0,049992041  | 0,113045 |
| Q16774 | Guanylate kinase OS=Homo sapiens OX=9606 GN=GUK1 PE=1 SV=2                                                      | -0,022069453 | 0,112557 |
| Q9Y4Z0 | U6 snRNA-associated Sm-like protein Lsm4 OS=Homo sapiens OX=9606 GN=LMS4 PE=1 SV=1                              | -0,022032122 | 0,11236  |
| Q6UW68 | Transmembrane protein 205 OS=Homo sapiens OX=9606 GN=TMEM205 PE=1 SV=1                                          | -0,049533363 | 0,111977 |
| Q03111 | Protein ENL OS=Homo sapiens OX=9606 GN=MLLT1 PE=1 SV=2                                                          | -0,049504785 | 0,11191  |
| Q92504 | Zinc transporter SLC39A7 OS=Homo sapiens OX=9606 GN=SLC39A7 PE=1 SV=2                                           | -0,049478725 | 0,111849 |
| Q9UQN3 | Charged multivesicular body protein 2b OS=Homo sapiens OX=9606 GN=CHMP2B PE=1 SV=1                              | -0,049265544 | 0,111353 |
| P51665 | 26S proteasome non-ATPase regulatory subunit 7 OS=Homo sapiens OX=9606 GN=PSMD7 PE=1 SV=2                       | 0,014541152  | 0,111134 |
| Q8WXE0 | Caskin-2 OS=Homo sapiens OX=9606 GN=CASKIN2 PE=1 SV=2                                                           | 0,041942082  | 0,110976 |
| Q9HA65 | TBC1 domain family member 17 OS=Homo sapiens OX=9606 GN=TBC1D17 PE=1 SV=2                                       | -0,036031009 | 0,110972 |
| Q9Y256 | Translation machinery-associated protein 7 OS=Homo sapiens OX=9606 GN=TMA7 PE=1 SV=1                            | -0,049023818 | 0,11079  |
| Q9NUG6 | p53 and DNA damage-regulated protein 1 OS=Homo sapiens OX=9606 GN=PDRG1 PE=1 SV=2                               | 0,048904554  | 0,110513 |
| O14545 | TRAF-type zinc finger domain-containing protein 1 OS=Homo sapiens OX=9606 GN=TRAFD1 PE=1 SV=1                   | 0,029877561  | 0,110501 |
| Q9BV54 | Serine/threonine-protein kinase RIO2 OS=Homo sapiens OX=9606 GN=RIO2 PE=1 SV=2                                  | -0,020501884 | 0,109196 |
| P49754 | Vacuolar protein sorting-associated protein 41 homolog OS=Homo sapiens OX=9606 GN=VPS41 PE=1 SV=3               | 0,029525507  | 0,109154 |
| Q9HB20 | Pleckstrin homology domain-containing family A member 3 OS=Homo sapiens OX=9606 GN=PLEKHA3 PE=1 SV=2            | -0,048018296 | 0,108451 |
| P46777 | 60S ribosomal protein L5 OS=Homo sapiens OX=9606 GN=RPL5 PE=1 SV=3                                              | 0,014168915  | 0,108189 |
| Q9ULV4 | Coronin-1C OS=Homo sapiens OX=9606 GN=CORO1C PE=1 SV=1                                                          | 0,011089039  | 0,107847 |

|        |                                                                                                                        |              |          |
|--------|------------------------------------------------------------------------------------------------------------------------|--------------|----------|
| Q9Y608 | Leucine-rich repeat flightless-interacting protein 2 OS=Homo sapiens OX=9606 GN=LRRFIP2 PE=1 SV=1                      | -0,019654469 | 0,107635 |
| P35613 | Basigin OS=Homo sapiens OX=9606 GN=BSG PE=1 SV=2                                                                       | 0,023012316  | 0,107597 |
| Q9Y6B6 | GTP-binding protein SAR1b OS=Homo sapiens OX=9606 GN=SAR1B PE=1 SV=1                                                   | 0,029036118  | 0,107284 |
| Q4KMQ2 | Anoctamin-6 OS=Homo sapiens OX=9606 GN=ANO6 PE=1 SV=2                                                                  | -0,022909938 | 0,107102 |
| Q96P16 | Regulation of nuclear pre-mRNA domain-containing protein 1A OS=Homo sapiens OX=9606 GN=RPRD1A PE=1 SV=1                | 0,028940692  | 0,106919 |
| Q6NUN0 | Cytochrome A synthetase ACSM5, mitochondrial OS=Homo sapiens OX=9606 GN=ACSM5 PE=1 SV=2                                | -0,093424326 | 0,106848 |
| Q95563 | Mitochondrial pyruvate carrier 2 OS=Homo sapiens OX=9606 GN=MPC2 PE=1 SV=1                                             | 0,047237666  | 0,106636 |
| Q9P2X0 | Dolichol-phosphate mannosyltransferase subunit 3 OS=Homo sapiens OX=9606 GN=DPM3 PE=1 SV=2                             | -0,047116108 | 0,106354 |
| P51116 | Fragile X mental retardation syndrome-related protein 2 OS=Homo sapiens OX=9606 GN=FXR2 PE=1 SV=2                      | -0,016289689 | 0,105669 |
| P51151 | Ras-related protein Rab-9A OS=Homo sapiens OX=9606 GN=RAB9A PE=1 SV=1                                                  | -0,046588902 | 0,105129 |
| Q5T8D3 | Acyl-CoA-binding domain-containing protein 5 OS=Homo sapiens OX=9606 GN=ACBD5 PE=1 SV=1                                | 0,028354805  | 0,104684 |
| Q14204 | Cytoplasmic dynein 1 heavy chain 1 OS=Homo sapiens OX=9606 GN=DYNC1H1 PE=1 SV=5                                        | -0,003536855 | 0,104582 |
| O94813 | Slit homolog 2 protein OS=Homo sapiens OX=9606 GN=SLIT2 PE=1 SV=1                                                      | -0,167564819 | 0,104401 |
| Q9NQ92 | Coordinator of PRMT5 and differentiation stimulator OS=Homo sapiens OX=9606 GN=COPRS PE=1 SV=3                         | 0,028259234  | 0,104319 |
| Q9UBB9 | Tuftelin-interacting protein 11 OS=Homo sapiens OX=9606 GN=TFIP11 PE=1 SV=1                                            | -0,018925518 | 0,103509 |
| P29590 | Protein PML OS=Homo sapiens OX=9606 GN=PML PE=1 SV=3                                                                   | -0,01136954  | 0,103109 |
| Q04446 | 1,4-alpha-glucan-branching enzyme OS=Homo sapiens OX=9606 GN=GBE1 PE=1 SV=3                                            | -0,009988635 | 0,10301  |
| P55209 | Nucleosome assembly protein 1-like 1 OS=Homo sapiens OX=9606 GN=NAP1L1 PE=1 SV=1                                       | 0,015123665  | 0,102602 |
| Q9Y3T9 | Nuclear complex protein 2 homolog OS=Homo sapiens OX=9606 GN=NOC2L PE=1 SV=4                                           | 0,016624604  | 0,102433 |
| Q14191 | Werner syndrome ATP-dependent helicase OS=Homo sapiens OX=9606 GN=WRN PE=1 SV=2                                        | -0,033270402 | 0,102204 |
| Q08722 | Leukocyte surface antigen CD47 OS=Homo sapiens OX=9606 GN=CD47 PE=1 SV=1                                               | 0,045167265  | 0,101831 |
| P62316 | Small nuclear ribonucleoprotein Sm D2 OS=Homo sapiens OX=9606 GN=SNRPD2 PE=1 SV=1                                      | 0,014993061  | 0,101687 |
| O60437 | Periplakin OS=Homo sapiens OX=9606 GN=PPL PE=1 SV=4                                                                    | 0,045031194  | 0,101516 |
| Q7Z7B0 | Filamin-A-interacting protein 1 OS=Homo sapiens OX=9606 GN=FLIP1 PE=1 SV=1                                             | -0,045003653 | 0,101452 |
| Q13188 | Serine/threonine-protein kinase 3 OS=Homo sapiens OX=9606 GN=STK3 PE=1 SV=2                                            | 0,027256326  | 0,101099 |
| Q8NBM4 | Ubiquitin-associated domain-containing protein 2 OS=Homo sapiens OX=9606 GN=UBAC2 PE=1 SV=1                            | 0,044560075  | 0,100424 |
| Q9Y696 | Chloride intracellular channel protein 4 OS=Homo sapiens OX=9606 GN=CLIC4 PE=1 SV=4                                    | 0,011996481  | 0,100415 |
| O43148 | mRNA cap guanine-N7 methyltransferase OS=Homo sapiens OX=9606 GN=RNM7 PE=1 SV=1                                        | -0,0196111   | 0,099616 |
| Q9NZ16 | Ubiquinone biosynthesis O-methyltransferase, mitochondrial OS=Homo sapiens OX=9606 GN=COQ3 PE=1 SV=3                   | 0,014141843  | 0,09931  |
| P62841 | 40S ribosomal protein S15 OS=Homo sapiens OX=9606 GN=RPS15 PE=1 SV=2                                                   | -0,019547558 | 0,099283 |
| Q14691 | DNA replication complex GINS protein PSF1 OS=Homo sapiens OX=9606 GN=GINS1 PE=1 SV=1                                   | -0,043903723 | 0,098904 |
| P62854 | 40S ribosomal protein S26 OS=Homo sapiens OX=9606 GN=RPS26 PE=1 SV=3                                                   | -0,02682495  | 0,098859 |
| P63218 | Guanine nucleotide-binding protein G(i)/G(s)/G(o) subunit gamma-5 OS=Homo sapiens OX=9606 GN=GNG5 PE=1 SV=3            | 0,02662959   | 0,098117 |
| Q86VP1 | Tax1-binding protein 1 OS=Homo sapiens OX=9606 GN=TAX1BP1 PE=1 SV=2                                                    | -0,023287313 | 0,097864 |
| Q96QR8 | Transcriptional activator protein Pur-beta OS=Homo sapiens OX=9606 GN=PURB PE=1 SV=3                                   | 0,026550321  | 0,097816 |
| Q9NR28 | Diablo homolog, mitochondrial OS=Homo sapiens OX=9606 GN=DIABLO PE=1 SV=1                                              | 0,026542343  | 0,097785 |
| Q93034 | Cullin-5 OS=Homo sapiens OX=9606 GN=CUL5 PE=1 SV=4                                                                     | -0,020954245 | 0,097672 |
| P26196 | Probable ATP-dependent RNA helicase DDX6 OS=Homo sapiens OX=9606 GN=DDX6 PE=1 SV=2                                     | -0,011663104 | 0,097535 |
| Q9UBQ7 | Glyoxylate reductase/hydroxypyruvate reductase OS=Homo sapiens OX=9606 GN=GRHR PE=1 SV=1                               | 0,015063255  | 0,09746  |
| Q9Y4C8 | Probable RNA-binding protein 19 OS=Homo sapiens OX=9606 GN=RBM19 PE=1 SV=3                                             | -0,043212403 | 0,097304 |
| O60244 | Mediator of RNA polymerase II transcription subunit 14 OS=Homo sapiens OX=9606 GN=MED14 PE=1 SV=2                      | -0,026394532 | 0,097224 |
| P23497 | Nuclear autoantigen Sp-100 OS=Homo sapiens OX=9606 GN=SP100 PE=1 SV=3                                                  | -0,019104076 | 0,09696  |
| Q68CZ6 | HAUS augmin-like complex subunit 3 OS=Homo sapiens OX=9606 GN=HAUS3 PE=1 SV=1                                          | 0,031528748  | 0,096694 |
| Q9Y276 | Mitochondrial chaperone BCS1 OS=Homo sapiens OX=9606 GN=BCS1L PE=1 SV=1                                                | 0,042859176  | 0,096487 |
| Q9NVJ2 | ADP-ribosylation factor-like protein 8B OS=Homo sapiens OX=9606 GN=ARL8B PE=1 SV=1                                     | -0,031371609 | 0,096197 |
| P50552 | Vasodilator-stimulated phosphoprotein OS=Homo sapiens OX=9606 GN=VASP PE=1 SV=3                                        | -0,011489697 | 0,096039 |
| Q9Y2L5 | Trafficking protein particle complex subunit 8 OS=Homo sapiens OX=9606 GN=TRAPP8 PE=1 SV=2                             | -0,031102269 | 0,095347 |
| Q9UBV8 | Peffin OS=Homo sapiens OX=9606 GN=PEF1 PE=1 SV=1                                                                       | 0,030983121  | 0,094971 |
| Q5VW32 | BRO1 domain-containing protein BROX OS=Homo sapiens OX=9606 GN=BROX PE=1 SV=1                                          | -0,020383375 | 0,09493  |
| Q9NPD3 | Exosome complex component RRP41 OS=Homo sapiens OX=9606 GN=EXOSC4 PE=1 SV=3                                            | -0,030854872 | 0,094567 |
| P40425 | Pre-B-cell leukemia transcription factor 2 OS=Homo sapiens OX=9606 GN=PBX2 PE=1 SV=2                                   | -0,041916969 | 0,09431  |
| O43292 | Glycosylphosphatidylinositol anchor attachment 1 protein OS=Homo sapiens OX=9606 GN=GPA1 PE=1 SV=3                     | -0,025599974 | 0,09421  |
| Q8IX11 | Mitochondrial RHPase 2 OS=Homo sapiens OX=9606 GN=RHOT2 PE=1 SV=2                                                      | 0,030739711  | 0,094203 |
| P00491 | Purine nucleoside phosphorylase OS=Homo sapiens OX=9606 GN=PNP PE=1 SV=2                                               | -0,013348488 | 0,094185 |
| Q15907 | Ras-related protein Rab-11B OS=Homo sapiens OX=9606 GN=RAB11B PE=1 SV=4                                                | -0,016456893 | 0,094114 |
| P46977 | Dolichyl-diphosphooligosaccharide-protein glycosyltransferase subunit STT3A OS=Homo sapiens OX=9606 GN=STT3A PE=1 SV=1 | 0,013857912  | 0,093752 |
| Q6RFH5 | WD repeat-containing protein 74 OS=Homo sapiens OX=9606 GN=WDR74 PE=1 SV=1                                             | 0,022284046  | 0,09354  |
| Q95396 | Adenylyltransferase and sulfurtransferase MOC53 OS=Homo sapiens OX=9606 GN=MOC53 PE=1 SV=1                             | 0,14521781   | 0,093447 |
| Q96IK1 | #N/D                                                                                                                   | 0,041480027  | 0,093301 |
| P34059 | N-acetylgalactosamine-6-sulfatase OS=Homo sapiens OX=9606 GN=GALNS PE=1 SV=1                                           | 0,030186234  | 0,092458 |
| Q5TA45 | Integrator complex subunit 11 OS=Homo sapiens OX=9606 GN=INTS11 PE=1 SV=2                                              | 0,021995901  | 0,092294 |
| Q12800 | Alpha-globin transcription factor CP2 OS=Homo sapiens OX=9606 GN=TFCP2 PE=1 SV=2                                       | 0,025010557  | 0,091977 |
| O00214 | Galectin-8 OS=Homo sapiens OX=9606 GN=LGALS8 PE=1 SV=4                                                                 | -0,040899127 | 0,09196  |
| P42224 | Signal transducer and activator of transcription 1-alpha/beta OS=Homo sapiens OX=9606 GN=STAT1 PE=1 SV=2               | -0,009447352 | 0,091401 |
| Q5VZF2 | Muscleblind-like protein 2 OS=Homo sapiens OX=9606 GN=MBNL2 PE=1 SV=2                                                  | -0,01674136  | 0,091209 |
| Q9BRP1 | Programmed cell death protein 2-like OS=Homo sapiens OX=9606 GN=PDCD2L PE=1 SV=1                                       | 0,040567856  | 0,091196 |
| Q96IJ6 | Mannose-1-phosphate guanylyltransferase alpha OS=Homo sapiens OX=9606 GN=GMPPA PE=1 SV=1                               | 0,024791381  | 0,091147 |
| Q9C0D3 | Protein zyg-11 homolog B OS=Homo sapiens OX=9606 GN=ZYG11B PE=1 SV=2                                                   | -0,0405378   | 0,091127 |
| Q9H0J4 | Ras-related protein Rab-1B OS=Homo sapiens OX=9606 GN=RAB1B PE=1 SV=1                                                  | -0,021670482 | 0,090889 |
| Q9Y3E1 | Hepatoma-derived growth factor-related protein 3 OS=Homo sapiens OX=9606 GN=HDGFL3 PE=1 SV=1                           | -0,024697331 | 0,090792 |
| Q9H9A6 | Leucine-rich repeat-containing protein 40 OS=Homo sapiens OX=9606 GN=LRRRC40 PE=1 SV=1                                 | -0,012774727 | 0,090016 |
| O15121 | Sphingolipid delta(4)-desaturase DES1 OS=Homo sapiens OX=9606 GN=DEGS1 PE=1 SV=1                                       | 0,024468186  | 0,089925 |
| P23396 | 40S ribosomal protein S3 OS=Homo sapiens OX=9606 GN=RPS3 PE=1 SV=2                                                     | 0,009662489  | 0,089351 |
| Q8IXT5 | RNA-binding protein 12B OS=Homo sapiens OX=9606 GN=RBM12B PE=1 SV=2                                                    | 0,019210026  | 0,089307 |
| Q86VP6 | Cullin-associated NEDD8-dissociated protein 1 OS=Homo sapiens OX=9606 GN=CAND1 PE=1 SV=2                               | -0,00627839  | 0,089002 |
| Q7Z417 | Nuclear fragile X mental retardation-interacting protein 2 OS=Homo sapiens OX=9606 GN=NUFIP2 PE=1 SV=1                 | -0,010626994 | 0,088618 |
| P25398 | 40S ribosomal protein S12 OS=Homo sapiens OX=9606 GN=RPS12 PE=1 SV=3                                                   | -0,016242795 | 0,088414 |
| O75592 | E3 ubiquitin-protein ligase MYCBP2 OS=Homo sapiens OX=9606 GN=MYCBP2 PE=1 SV=4                                         | -0,029519193 | 0,087665 |
| Q8WWW7 | Glycosylated lysosomal membrane protein OS=Homo sapiens OX=9606 GN=GLMP PE=1 SV=1                                      | 0,038950106  | 0,087469 |
| Q2TA45 | GDP-Man:Man(3)GlcNAc(2)-PP-Dol alpha-1,2-mannosyltransferase OS=Homo sapiens OX=9606 GN=ALG11 PE=1 SV=2                | 0,038905892  | 0,087367 |
| Q9BXV9 | EKC/KEOPS complex subunit GON7 OS=Homo sapiens OX=9606 GN=GON7 PE=1 SV=2                                               | -0,038717055 | 0,086932 |
| P21281 | V-type proton ATPase subunit B, brain isoform OS=Homo sapiens OX=9606 GN=ATP6V1B2 PE=1 SV=3                            | 0,009604146  | 0,086642 |
| Q16864 | V-type proton ATPase subunit F OS=Homo sapiens OX=9606 GN=ATP6V1F PE=1 SV=2                                            | 0,018650141  | 0,086631 |
| P61769 | Beta-2-microglobulin OS=Homo sapiens OX=9606 GN=B2M PE=1 SV=1                                                          | 0,02819549   | 0,086197 |
| Q9BY44 | Eukaryotic translation initiation factor 2A OS=Homo sapiens OX=9606 GN=EIF2A PE=1 SV=3                                 | 0,008917067  | 0,086125 |
| P0DI81 | Trafficking protein particle complex subunit 2 OS=Homo sapiens OX=9606 GN=TRAPP2 PE=1 SV=1                             | 0,038069876  | 0,085443 |
| Q9H4I9 | Essential MCU regulator, mitochondrial OS=Homo sapiens OX=9606 GN=SMGT1 PE=1 SV=1                                      | -0,037972089 | 0,085218 |
| Q7Z739 | YTH domain-containing family protein 3 OS=Homo sapiens OX=9606 GN=YTHDF3 PE=1 SV=1                                     | -0,01204267  | 0,084714 |
| Q13523 | Serine/threonine-protein kinase PRP4 homolog OS=Homo sapiens OX=9606 GN=PRPF4B PE=1 SV=3                               | -0,016685687 | 0,084348 |
| Q15042 | Rab3 GTPase-activating protein catalytic subunit OS=Homo sapiens OX=9606 GN=RAB3GAP1 PE=1 SV=3                         | -0,009842883 | 0,08428  |
| O43681 | ATPase ASNA1 OS=Homo sapiens OX=9606 GN=ASNA1 PE=1 SV=2                                                                | 0,011435897  | 0,083586 |

|        |                                                                                                             |              |          |
|--------|-------------------------------------------------------------------------------------------------------------|--------------|----------|
| Q92945 | Far upstream element-binding protein 2 OS=Homo sapiens OX=9606 GN=KHSRP PE=1 SV=4                           | -0,007708956 | 0,083358 |
| Q9Y2I8 | WD repeat-containing protein 37 OS=Homo sapiens OX=9606 GN=WDR37 PE=1 SV=2                                  | 0,02721464   | 0,08312  |
| Q95758 | Polypyrimidine tract-binding protein 3 OS=Homo sapiens OX=9606 GN=PTBP3 PE=1 SV=2                           | -0,03703441  | 0,083064 |
| Q99805 | Transmembrane 9 superfamily member 2 OS=Homo sapiens OX=9606 GN=TM9SF2 PE=1 SV=1                            | -0,013555035 | 0,083005 |
| P49407 | Beta-arrestin-1 OS=Homo sapiens OX=9606 GN=ARRB1 PE=1 SV=2                                                  | 0,036927548  | 0,082818 |
| Q9UQ13 | Leucine-rich repeat protein SHOC-2 OS=Homo sapiens OX=9606 GN=SHOC2 PE=1 SV=2                               | 0,019688768  | 0,082356 |
| P49768 | Presenilin-1 OS=Homo sapiens OX=9606 GN=PSEN1 PE=1 SV=1                                                     | 0,037343127  | 0,082097 |
| Q03169 | Tumor necrosis factor alpha-induced protein 2 OS=Homo sapiens OX=9606 GN=TNFAIP2 PE=2 SV=2                  | 0,017692974  | 0,082065 |
| Q8NCW5 | NAD(P)H-hydrate epimerase OS=Homo sapiens OX=9606 GN=NAXE PE=1 SV=2                                         | -0,013340604 | 0,081657 |
| P30043 | Flavin reductase (NADPH) OS=Homo sapiens OX=9606 GN=BLVRB PE=1 SV=3                                         | -0,011567075 | 0,081279 |
| Q9BUF5 | Tubulin beta-6 chain OS=Homo sapiens OX=9606 GN=TUBB6 PE=1 SV=1                                             | -0,012023268 | 0,081009 |
| Q98XK1 | Kruppel-like factor 16 OS=Homo sapiens OX=9606 GN=KLF16 PE=1 SV=1                                           | -0,019519634 | 0,080307 |
| P49755 | Transmembrane emp24 domain-containing protein 10 OS=Homo sapiens OX=9606 GN=TMED10 PE=1 SV=2                | 0,019166832  | 0,080116 |
| O75362 | Zinc finger protein 217 OS=Homo sapiens OX=9606 GN=ZNF217 PE=1 SV=1                                         | -0,02186436  | 0,08011  |
| Q05193 | Dynamin-1 OS=Homo sapiens OX=9606 GN=DNM1 PE=1 SV=2                                                         | 0,006853559  | 0,080063 |
| Q15853 | #N/D                                                                                                        | -0,115661803 | 0,080013 |
| P11387 | DNA topoisomerase 1 OS=Homo sapiens OX=9606 GN=TOP1 PE=1 SV=2                                               | -0,008280083 | 0,07981  |
| Q6UWEO | E3 ubiquitin-protein ligase LRSAM1 OS=Homo sapiens OX=9606 GN=LRSAM1 PE=1 SV=1                              | -0,013739828 | 0,079452 |
| O15145 | Actin-related protein 2/3 complex subunit 3 OS=Homo sapiens OX=9606 GN=ARPC3 PE=1 SV=3                      | -0,0156678   | 0,079069 |
| Q15555 | Microtubule-associated protein RP/EB family member 2 OS=Homo sapiens OX=9606 GN=MAPRE2 PE=1 SV=1            | 0,01867878   | 0,078024 |
| Q13371 | Phosducin-like protein OS=Homo sapiens OX=9606 GN=PDCL PE=1 SV=3                                            | -0,034727754 | 0,077773 |
| P12931 | Proto-oncogene tyrosine-protein kinase Src OS=Homo sapiens OX=9606 GN=SRC PE=1 SV=3                         | -0,015401442 | 0,077691 |
| Q05048 | Cleavage stimulation factor subunit 1 OS=Homo sapiens OX=9606 GN=CSTF1 PE=1 SV=1                            | 0,012678672  | 0,077501 |
| P28288 | ATP-binding cassette sub-family D member 3 OS=Homo sapiens OX=9606 GN=ABCD3 PE=1 SV=1                       | -0,011002237 | 0,077208 |
| Q13613 | Myotubularin-related protein 1 OS=Homo sapiens OX=9606 GN=MTMR1 PE=1 SV=4                                   | -0,025257253 | 0,076996 |
| Q15773 | Myeloid leukemia factor 2 OS=Homo sapiens OX=9606 GN=MLF2 PE=1 SV=1                                         | 0,034288371  | 0,076767 |
| O75923 | Dysferlin OS=Homo sapiens OX=9606 GN=DYSF PE=1 SV=1                                                         | 0,014130163  | 0,076625 |
| P49711 | Transcriptional repressor CTCF OS=Homo sapiens OX=9606 GN=CTCF PE=1 SV=1                                    | -0,025067933 | 0,076405 |
| Q9BRP4 | Proteasomal ATPase-associated factor 1 OS=Homo sapiens OX=9606 GN=PAAF1 PE=1 SV=2                           | 0,013968481  | 0,075726 |
| Q8IXK0 | Polyhomeotic-like protein 2 OS=Homo sapiens OX=9606 GN=PHC2 PE=1 SV=1                                       | -0,033828869 | 0,075715 |
| Q9Y6N1 | Cytochrome c oxidase assembly protein COX11, mitochondrial OS=Homo sapiens OX=9606 GN=COX11 PE=1 SV=3       | -0,025184455 | 0,075655 |
| Q9C099 | Leucine-rich repeat and coiled-coil domain-containing protein 1 OS=Homo sapiens OX=9606 GN=LRRCC1 PE=1 SV=2 | -0,033785023 | 0,075615 |
| Q16706 | Alpha-D-mannosidase 2 OS=Homo sapiens OX=9606 GN=MAN2A1 PE=1 SV=2                                           | -0,007389337 | 0,075535 |
| Q96J3  | Engulfment and cell motility protein 2 OS=Homo sapiens OX=9606 GN=ELMO2 PE=1 SV=2                           | 0,020621264  | 0,075444 |
| P50402 | Emerin OS=Homo sapiens OX=9606 GN=EMD PE=1 SV=1                                                             | 0,009085535  | 0,075442 |
| P07195 | L-lactate dehydrogenase B chain OS=Homo sapiens OX=9606 GN=LDHB PE=1 SV=2                                   | -0,00932813  | 0,075199 |
| Q13045 | Protein flightless-1 homolog OS=Homo sapiens OX=9606 GN=FLII PE=1 SV=2                                      | -0,005803207 | 0,075128 |
| P23443 | Ribosomal protein S6 kinase beta-1 OS=Homo sapiens OX=9606 GN=RPS6KB1 PE=1 SV=2                             | -0,02454494  | 0,074773 |
| P60468 | Protein transport protein Sec61 subunit beta OS=Homo sapiens OX=9606 GN=SEC61B PE=1 SV=2                    | 0,024494444  | 0,074616 |
| Q724W1 | L-xylulose reductase OS=Homo sapiens OX=9606 GN=DCXR PE=1 SV=2                                              | -0,012897566 | 0,074462 |
| Q8NFC6 | Biorientation of chromosomes in cell division protein 1-like 1 OS=Homo sapiens OX=9606 GN=BOD1L1 PE=1 SV=2  | -0,032608709 | 0,072925 |
| Q9NY12 | H/ACA ribonucleoprotein complex subunit 1 OS=Homo sapiens OX=9606 GN=GAR1 PE=1 SV=1                         | -0,019891925 | 0,072713 |
| P62877 | E3 ubiquitin-protein ligase RBX1 OS=Homo sapiens OX=9606 GN=RBX1 PE=1 SV=1                                  | -0,023869902 | 0,072669 |
| Q9P1F3 | Costars family protein ABRACL OS=Homo sapiens OX=9606 GN=ABRACL PE=1 SV=1                                   | 0,032420462  | 0,072495 |
| Q06203 | Amidophosphoribosyltransferase OS=Homo sapiens OX=9606 GN=PPAT PE=1 SV=1                                    | -0,011239096 | 0,072113 |
| O14787 | Transportin-2 OS=Homo sapiens OX=9606 GN=TNPO2 PE=1 SV=3                                                    | -0,010264163 | 0,071905 |
| Q6NW34 | Nucleolin and neural progenitor protein OS=Homo sapiens OX=9606 GN=NEPRO PE=1 SV=3                          | -0,032003799 | 0,071544 |
| P20339 | Ras-related protein Rab-5A OS=Homo sapiens OX=9606 GN=RAB5A PE=1 SV=2                                       | -0,023274106 | 0,070815 |
| P13639 | Elongation factor 2 OS=Homo sapiens OX=9606 GN=EEF2 PE=1 SV=4                                               | -0,004420896 | 0,070402 |
| P49590 | Probable histidine-tRNA ligase, mitochondrial OS=Homo sapiens OX=9606 GN=HARS2 PE=1 SV=1                    | 0,019227777  | 0,07023  |
| Q96CB8 | Integrator complex subunit 12 OS=Homo sapiens OX=9606 GN=INTS12 PE=1 SV=1                                   | -0,031205985 | 0,069723 |
| Q8N1F8 | Serine/threonine-protein kinase 11-interacting protein OS=Homo sapiens OX=9606 GN=STK11IP PE=1 SV=4         | -0,030908813 | 0,069045 |
| Q9NQ48 | Leucine zipper transcription factor-like protein 1 OS=Homo sapiens OX=9606 GN=LZTF1 PE=1 SV=1               | -0,030802537 | 0,068803 |
| Q2NKX8 | DNA excision repair protein ERCC-6-like OS=Homo sapiens OX=9606 GN=ERCC6L PE=1 SV=1                         | -0,010584963 | 0,067837 |
| Q13889 | General transcription factor IIH subunit 3 OS=Homo sapiens OX=9606 GN=GTF2H3 PE=1 SV=2                      | 0,049464011  | 0,06774  |
| Q9Y6K0 | Choline/ethanolaminephosphotransferase 1 OS=Homo sapiens OX=9606 GN=CEPT1 PE=1 SV=1                         | 0,030214435  | 0,067463 |
| O00592 | Podocalyxin OS=Homo sapiens OX=9606 GN=PODXL PE=1 SV=2                                                      | 0,009631515  | 0,067374 |
| Q8WUY3 | Protein prune homolog 2 OS=Homo sapiens OX=9606 GN=PRUNE2 PE=1 SV=3                                         | -0,052592791 | 0,066987 |
| Q15075 | Early endosome antigen 1 OS=Homo sapiens OX=9606 GN=EEA1 PE=1 SV=2                                          | -0,005066568 | 0,066938 |
| P26447 | Protein S100-A4 OS=Homo sapiens OX=9606 GN=S100A4 PE=1 SV=1                                                 | 0,014499627  | 0,066928 |
| Q9HCK8 | #N/D                                                                                                        | -0,029922091 | 0,066797 |
| Q9BZV1 | UBX domain-containing protein 6 OS=Homo sapiens OX=9606 GN=UBXN6 PE=1 SV=1                                  | 0,010425959  | 0,066795 |
| Q9UNX4 | WD repeat-containing protein 3 OS=Homo sapiens OX=9606 GN=WDR3 PE=1 SV=1                                    | -0,010954657 | 0,06673  |
| Q8N1G2 | Cap-specific mRNA (nucleoside-2'-O-)-methyltransferase 1 OS=Homo sapiens OX=9606 GN=CMTR1 PE=1 SV=1         | -0,015954564 | 0,066397 |
| Q9BRA2 | Thioredoxin domain-containing protein 17 OS=Homo sapiens OX=9606 GN=TXNDC17 PE=1 SV=1                       | -0,018176352 | 0,066306 |
| Q15427 | Splicing factor 3B subunit 4 OS=Homo sapiens OX=9606 GN=SF3B4 PE=1 SV=1                                     | 0,015903608  | 0,06618  |
| Q8N9I9 | Probable E3 ubiquitin-protein ligase DTX3 OS=Homo sapiens OX=9606 GN=DTX3 PE=1 SV=2                         | 0,060851119  | 0,066106 |
| Q967A2 | ATP-dependent zinc metalloprotease YME1L1 OS=Homo sapiens OX=9606 GN=YME1L1 PE=1 SV=2                       | 0,011477045  | 0,066081 |
| P50336 | Protoporphyrinogen oxidase OS=Homo sapiens OX=9606 GN=PPOX PE=1 SV=1                                        | 0,012221329  | 0,066047 |
| O15075 | #N/D                                                                                                        | 0,033671862  | 0,065816 |
| P54619 | 5'-AMP-activated protein kinase subunit gamma-1 OS=Homo sapiens OX=9606 GN=PRKAG1 PE=1 SV=1                 | -0,015763745 | 0,065586 |
| Q965T8 | Centrosomal protein of 89 kDa OS=Homo sapiens OX=9606 GN=CEP89 PE=1 SV=3                                    | -0,025541409 | 0,06539  |
| P62979 | Ubiquitin-40S ribosomal protein S27a OS=Homo sapiens OX=9606 GN=RPS27A PE=1 SV=2                            | -0,029196221 | 0,065145 |
| P61026 | Ras-related protein Rab-10 OS=Homo sapiens OX=9606 GN=RAB10 PE=1 SV=1                                       | 0,009698816  | 0,065009 |
| P10606 | Cytochrome c oxidase subunit 5B, mitochondrial OS=Homo sapiens OX=9606 GN=COX5B PE=1 SV=2                   | -0,012828566 | 0,064436 |
| P22570 | NADPH:adenodoxin oxidoreductase, mitochondrial OS=Homo sapiens OX=9606 GN=FDXR PE=1 SV=3                    | -0,009205095 | 0,064327 |
| O43242 | 26S proteasome non-ATPase regulatory subunit 3 OS=Homo sapiens OX=9606 GN=PSMD3 PE=1 SV=2                   | -0,00613675  | 0,063657 |
| O75347 | Tubulin-specific chaperone A OS=Homo sapiens OX=9606 GN=TBCA PE=1 SV=3                                      | 0,010454219  | 0,063617 |
| P04179 | Superoxide dismutase [Mn], mitochondrial OS=Homo sapiens OX=9606 GN=SOD2 PE=1 SV=3                          | -0,013780891 | 0,063541 |
| Q6ZSR9 | Uncharacterized protein FLJ45252 OS=Homo sapiens OX=9606 GN=PE=2 SV=2                                       | 0,015264     | 0,063463 |
| Q70E11 | Inactive ubiquitin carboxyl-terminal hydrolase 54 OS=Homo sapiens OX=9606 GN=USP54 PE=1 SV=4                | 0,028343313  | 0,063206 |
| Q9BV57 | 1,2-dihydroxy-3-keto-5-methylthiopentene dioxygenase OS=Homo sapiens OX=9606 GN=ADI1 PE=1 SV=1              | -0,010935228 | 0,062896 |
| Q9BQB6 | Vitamin K epoxide reductase complex subunit 1 OS=Homo sapiens OX=9606 GN=VKORC1 PE=1 SV=1                   | -0,027760536 | 0,061882 |
| A8MWD9 | Putative small nuclear ribonucleoprotein G-like protein 15 OS=Homo sapiens OX=9606 GN=SNRPGP15 PE=5 SV=2    | -0,020282412 | 0,061532 |
| Q969E8 | Pre-rRNA-processing protein TSR2 homolog OS=Homo sapiens OX=9606 GN=TSR2 PE=1 SV=1                          | -0,027181765 | 0,060568 |
| P05387 | 60S acidic ribosomal protein P2 OS=Homo sapiens OX=9606 GN=RPLP2 PE=1 SV=1                                  | 0,011983572  | 0,060107 |
| P60953 | Cell division control protein 42 homolog OS=Homo sapiens OX=9606 GN=CDC42 PE=1 SV=2                         | 0,009859872  | 0,059928 |
| O60341 | Lysine-specific histone demethylase 1A OS=Homo sapiens OX=9606 GN=KDM1A PE=1 SV=2                           | -0,008832088 | 0,059085 |
| P04083 | Annexin A1 OS=Homo sapiens OX=9606 GN=ANXA1 PE=1 SV=2                                                       | 0,00600177   | 0,058663 |
| O43852 | Calumenin OS=Homo sapiens OX=9606 GN=CALU PE=1 SV=2                                                         | -0,007547053 | 0,058645 |
| P61011 | Signal recognition particle 54 kDa protein OS=Homo sapiens OX=9606 GN=SRP54 PE=1 SV=1                       | -0,009151372 | 0,05847  |

|        |                                                                                                                  |              |          |
|--------|------------------------------------------------------------------------------------------------------------------|--------------|----------|
| Q9P0I2 | ER membrane protein complex subunit 3 OS=Homo sapiens OX=9606 GN=EMC3 PE=1 SV=3                                  | -0,019140209 | 0,058002 |
| Q9BW91 | ADP-ribose pyrophosphatase, mitochondrial OS=Homo sapiens OX=9606 GN=NUDT9 PE=1 SV=1                             | -0,01593647  | 0,05798  |
| P47224 | Guanine nucleotide exchange factor MS4 OS=Homo sapiens OX=9606 GN=RABIF PE=1 SV=2                                | -0,025978966 | 0,05784  |
| P55039 | Developmentally-regulated GTP-binding protein 2 OS=Homo sapiens OX=9606 GN=DRG2 PE=1 SV=1                        | -0,012530189 | 0,05764  |
| Q9GZT9 | Egl nine homolog 1 OS=Homo sapiens OX=9606 GN=EGLN1 PE=1 SV=1                                                    | 0,009493199  | 0,057656 |
| Q8NEI9 | Neuroguinid OS=Homo sapiens OX=9606 GN=NGDN PE=1 SV=1                                                            | -0,025665606 | 0,05713  |
| Q14155 | Rho guanine nucleotide exchange factor 7 OS=Homo sapiens OX=9606 GN=ARHGFE7 PE=1 SV=2                            | -0,010486033 | 0,056493 |
| Q9ULC3 | Ras-related protein Rab-23 OS=Homo sapiens OX=9606 GN=RAB23 PE=1 SV=1                                            | 0,01855325   | 0,056191 |
| O60551 | Glycylpeptide N-tetradecanoyltransferase 2 OS=Homo sapiens OX=9606 GN=NMT2 PE=1 SV=1                             | -0,012184574 | 0,056044 |
| O15078 | Centrosomal protein of 290 kDa OS=Homo sapiens OX=9606 GN=CCEP290 PE=1 SV=2                                      | -0,068982922 | 0,055723 |
| P07737 | Profilin-1 OS=Homo sapiens OX=9606 GN=PFN1 PE=1 SV=2                                                             | -0,00833786  | 0,055717 |
| Q8TCU4 | Alstrom syndrome protein 1 OS=Homo sapiens OX=9606 GN=ALMS1 PE=1 SV=4                                            | 0,024865746  | 0,05532  |
| Q7RTV0 | PHD finger-like domain-containing protein 5A OS=Homo sapiens OX=9606 GN=PHF5A PE=1 SV=1                          | -0,013292963 | 0,055119 |
| Q8N9N7 | Leucine-rich repeat-containing protein 57 OS=Homo sapiens OX=9606 GN=LRRCS7 PE=1 SV=1                            | 0,024432204  | 0,054339 |
| P29558 | RNA-binding motif, single-stranded-interacting protein 1 OS=Homo sapiens OX=9606 GN=RBMS1 PE=1 SV=3              | -0,024244182 | 0,053914 |
| P15153 | Ras-related C3 botulinum toxin substrate 2 OS=Homo sapiens OX=9606 GN=RAC2 PE=1 SV=1                             | 0,01163807   | 0,053465 |
| Q9UGP4 | LIM domain-containing protein 1 OS=Homo sapiens OX=9606 GN=LIMD1 PE=1 SV=1                                       | 0,013515331  | 0,053363 |
| Q14669 | E3 ubiquitin-protein ligase TRIP12 OS=Homo sapiens OX=9606 GN=TRIP12 PE=1 SV=1                                   | 0,004804402  | 0,053157 |
| P68366 | Tubulin alpha-4A chain OS=Homo sapiens OX=9606 GN=TUBA4A PE=1 SV=1                                               | -0,011538707 | 0,053021 |
| Q06265 | Exosome complex component RRP45 OS=Homo sapiens OX=9606 GN=EXOSC9 PE=1 SV=3                                      | -0,012638789 | 0,052359 |
| O95149 | Snurportin-1 OS=Homo sapiens OX=9606 GN=SNUPN PE=1 SV=1                                                          | 0,017049548  | 0,05156  |
| Q8IV08 | Phospholipase D3 OS=Homo sapiens OX=9606 GN=PLD3 PE=1 SV=1                                                       | -0,007296693 | 0,050764 |
| Q86V58 | Protein Hook homolog 3 OS=Homo sapiens OX=9606 GN=HOOK3 PE=1 SV=2                                                | -0,006991508 | 0,050554 |
| P01111 | GTPase NRas OS=Homo sapiens OX=9606 GN=NRAS PE=1 SV=1                                                            | -0,013830732 | 0,050192 |
| Q5W0V3 | Protein FAM160B1 OS=Homo sapiens OX=9606 GN=FAM160B1 PE=1 SV=1                                                   | 0,008246093  | 0,049555 |
| P17655 | Calpain-2 catalytic subunit OS=Homo sapiens OX=9606 GN=CAPN2 PE=1 SV=6                                           | 0,004377624  | 0,049133 |
| Q15165 | Serum paraoxonase/arylesterase 2 OS=Homo sapiens OX=9606 GN=PON2 PE=1 SV=4                                       | 0,00719604   | 0,047964 |
| Q9Y388 | Oligoribonuclease, mitochondrial OS=Homo sapiens OX=9606 GN=REXO2 PE=1 SV=3                                      | -0,007517259 | 0,047862 |
| P51812 | Ribosomal protein S6 kinase alpha-3 OS=Homo sapiens OX=9606 GN=RPS6KA3 PE=1 SV=1                                 | 0,006373964  | 0,047727 |
| Q9Y383 | Putative RNA-binding protein Luc7-like 2 OS=Homo sapiens OX=9606 GN=LUC7L2 PE=1 SV=2                             | -0,00885016  | 0,047539 |
| Q9NPF4 | Problein tRNA N6-adenosine threonylcarbamoyltransferase OS=Homo sapiens OX=9606 GN=OSGEP PE=1 SV=1               | -0,021312467 | 0,047288 |
| Q9BVG9 | Phosphatidylserine synthase 2 OS=Homo sapiens OX=9606 GN=PTSDS2 PE=1 SV=1                                        | -0,042006442 | 0,04671  |
| Q14457 | Beclin-1 OS=Homo sapiens OX=9606 GN=BECN1 PE=1 SV=2                                                              | -0,011216875 | 0,046377 |
| Q99417 | c-Myc-binding protein OS=Homo sapiens OX=9606 GN=MYCBP PE=1 SV=3                                                 | -0,012780203 | 0,046321 |
| Q8WU90 | Zinc finger CCH domain-containing protein 15 OS=Homo sapiens OX=9606 GN=ZC3H15 PE=1 SV=1                         | 0,006394918  | 0,046173 |
| Q96MW1 | Coiled-coil domain-containing protein 43 OS=Homo sapiens OX=9606 GN=CCDC43 PE=1 SV=2                             | 0,015271797  | 0,046103 |
| O14773 | Tripeptidyl-peptidase 1 OS=Homo sapiens OX=9606 GN=TPP1 PE=1 SV=2                                                | 0,012503293  | 0,045302 |
| Q4G148 | Glucosyl xylosyltransferase 1 OS=Homo sapiens OX=9606 GN=GXYLT1 PE=1 SV=2                                        | -0,014703888 | 0,044364 |
| P61604 | 10 kDa heat shock protein, mitochondrial OS=Homo sapiens OX=9606 GN=HSP10 PE=1 SV=2                              | -0,006924819 | 0,044034 |
| O00268 | Transcription initiation factor TFIID subunit 4 OS=Homo sapiens OX=9606 GN=TF4 PE=1 SV=2                         | 0,019804263  | 0,043905 |
| Q06124 | Tyrosine-protein phosphatase non-receptor type 11 OS=Homo sapiens OX=9606 GN=PTPN11 PE=1 SV=2                    | 0,004474523  | 0,043516 |
| P40818 | Ubiquitin carboxyl-terminal hydrolase 8 OS=Homo sapiens OX=9606 GN=USP8 PE=1 SV=1                                | -0,011962763 | 0,043316 |
| Q86U70 | LIM domain-binding protein 1 OS=Homo sapiens OX=9606 GN=LDB1 PE=1 SV=2                                           | 0,020059763  | 0,043151 |
| P00387 | NADH-cytochrome b5 reductase 3 OS=Homo sapiens OX=9606 GN=CYB5R3 PE=1 SV=3                                       | -0,005100313 | 0,043086 |
| Q15628 | Tumor necrosis factor receptor type 1-associated DEATH domain protein OS=Homo sapiens OX=9606 GN=TRADD PE=1 SV=1 | 0,011875805  | 0,042996 |
| P42345 | Serine/threonine-protein kinase mTOR OS=Homo sapiens OX=9606 GN=MTOR PE=1 SV=1                                   | 0,006301935  | 0,04192  |
| P29218 | Inositol monophosphatase 1 OS=Homo sapiens OX=9606 GN=IMPA1 PE=1 SV=1                                            | 0,009056568  | 0,041457 |
| O95881 | Thioredoxin domain-containing protein 12 OS=Homo sapiens OX=9606 GN=TXNDC12 PE=1 SV=1                            | 0,009023135  | 0,041302 |
| O94992 | Protein HEXIM1 OS=Homo sapiens OX=9606 GN=HEXIM1 PE=1 SV=1                                                       | -0,013680563 | 0,041234 |
| P34897 | Serine hydroxymethyltransferase, mitochondrial OS=Homo sapiens OX=9606 GN=SHMT2 PE=1 SV=3                        | 0,004062117  | 0,041054 |
| Q9Y450 | HBS1-like protein OS=Homo sapiens OX=9606 GN=HBS1L PE=1 SV=1                                                     | 0,005492118  | 0,041032 |
| Q9NXV6 | CDKN2A-interacting protein OS=Homo sapiens OX=9606 GN=CDKN2AIP PE=1 SV=3                                         | 0,006162452  | 0,04098  |
| P11586 | C-1-tetrahydrofolate synthase, cytoplasmic OS=Homo sapiens OX=9606 GN=MTHFD1 PE=1 SV=3                           | 0,003559236  | 0,04044  |
| Q13907 | Isopentenyl-diphosphate Delta-isomerase 1 OS=Homo sapiens OX=9606 GN=IDI1 PE=1 SV=2                              | -0,007536334 | 0,040386 |
| Q659C4 | La-related protein 1B OS=Homo sapiens OX=9606 GN=LARP1B PE=1 SV=2                                                | -0,008085273 | 0,03993  |
| Q96P70 | Importin-9 OS=Homo sapiens OX=9606 GN=IPO9 PE=1 SV=3                                                             | -0,003621517 | 0,039893 |
| Q9HAT2 | Sialate O-acetyltransferase OS=Homo sapiens OX=9606 GN=SIAE PE=1 SV=1                                            | -0,017832576 | 0,039479 |
| Q01628 | Interferon-induced transmembrane protein 3 OS=Homo sapiens OX=9606 GN=IFITM3 PE=1 SV=2                           | 0,012981894  | 0,039101 |
| P19174 | 1-phosphatidylinositol 4,5-bisphosphate phosphodiesterase gamma-1 OS=Homo sapiens OX=9606 GN=PLCG1 PE=1 SV=1     | 0,004173527  | 0,038834 |
| P53701 | Cytochrome c-type heme lyase OS=Homo sapiens OX=9606 GN=HCPS PE=1 SV=1                                           | -0,005263472 | 0,037899 |
| Q9Y6M9 | NADH dehydrogenase [ubiquinone] 1 beta subcomplex subunit 9 OS=Homo sapiens OX=9606 GN=NDUFB9 PE=1 SV=3          | -0,010484642 | 0,037896 |
| Q9H2H8 | Peptidyl-prolyl cis-trans isomerase-like 3 OS=Homo sapiens OX=9606 GN=PLI3 PE=1 SV=1                             | -0,007283421 | 0,036245 |
| Q08AM6 | Protein VAC14 homolog OS=Homo sapiens OX=9606 GN=VAC14 PE=1 SV=1                                                 | -0,007901673 | 0,036106 |
| Q9NY33 | Dipeptidyl peptidase 3 OS=Homo sapiens OX=9606 GN=DPP3 PE=1 SV=2                                                 | -0,003867433 | 0,035951 |
| Q9Y2G8 | Dnal homolog subfamily C member 16 OS=Homo sapiens OX=9606 GN=DNALC16 PE=2 SV=3                                  | -0,019063581 | 0,035552 |
| Q96MX6 | WD repeat-containing protein 92 OS=Homo sapiens OX=9606 GN=WDR92 PE=1 SV=1                                       | -0,007696819 | 0,035159 |
| Q9BVM2 | Protein DPCD OS=Homo sapiens OX=9606 GN=DPCD PE=1 SV=2                                                           | 0,015760123  | 0,03484  |
| Q13561 | Dynactin subunit 2 OS=Homo sapiens OX=9606 GN=DCTN2 PE=1 SV=4                                                    | 0,003940726  | 0,034077 |
| P52815 | 39S ribosomal protein L12, mitochondrial OS=Homo sapiens OX=9606 GN=MRLP12 PE=1 SV=2                             | 0,008033086  | 0,033068 |
| O94907 | Dickkopf-related protein 1 OS=Homo sapiens OX=9606 GN=DKK1 PE=1 SV=1                                             | -0,006566662 | 0,032639 |
| Q9H2P9 | Diphthine methyl ester synthase OS=Homo sapiens OX=9606 GN=DPHS PE=1 SV=2                                        | -0,010640439 | 0,031974 |
| Q9NXH9 | tRNA (guanine(26)-N(2))-dimethyltransferase OS=Homo sapiens OX=9606 GN=TRMT1 PE=1 SV=1                           | -0,005981533 | 0,031964 |
| P05386 | 60S acidic ribosomal protein P1 OS=Homo sapiens OX=9606 GN=RPLP1 PE=1 SV=1                                       | 0,010581954  | 0,031796 |
| P28062 | Proteasome subunit beta type-8 OS=Homo sapiens OX=9606 GN=PSMB8 PE=1 SV=3                                        | -0,005922384 | 0,031645 |
| O15260 | Surfeit locus protein 4 OS=Homo sapiens OX=9606 GN=SURF4 PE=1 SV=3                                               | 0,006872746  | 0,031354 |
| Q9Y5N5 | Methyltransferase N6AMT1 OS=Homo sapiens OX=9606 GN=N6AMT1 PE=1 SV=4                                             | -0,010154936 | 0,03005  |
| Q9BZ25 | Apoptosis inhibitor 5 OS=Homo sapiens OX=9606 GN=API5 PE=1 SV=3                                                  | 0,004086678  | 0,029341 |
| P62081 | 40S ribosomal protein S7 OS=Homo sapiens OX=9606 GN=RPS7 PE=1 SV=1                                               | -0,004375514 | 0,02898  |
| Q9H9H4 | Vacuolar protein sorting-associated protein 37B OS=Homo sapiens OX=9606 GN=VPS37B PE=1 SV=1                      | 0,007847705  | 0,028274 |
| Q96J17 | Protein disulfide-isomerase TMX3 OS=Homo sapiens OX=9606 GN=TMX3 PE=1 SV=2                                       | -0,007556997 | 0,027217 |
| Q9NNW5 | WD repeat-containing protein 6 OS=Homo sapiens OX=9606 GN=WDR6 PE=1 SV=1                                         | 0,007515333  | 0,027066 |
| O95801 | Tetratricopeptide repeat protein 4 OS=Homo sapiens OX=9606 GN=TRTP4 PE=1 SV=3                                    | 0,005931248  | 0,02702  |
| Q9P2Q2 | FERM domain-containing protein 4A OS=Homo sapiens OX=9606 GN=FRMD4A PE=1 SV=3                                    | -0,007352128 | 0,026811 |
| Q15155 | Nodal modulator 1 OS=Homo sapiens OX=9606 GN=NOMO1 PE=1 SV=5                                                     | 0,012118953  | 0,02672  |
| Q8N183 | NADH dehydrogenase [ubiquinone] 1 alpha subcomplex assembly factor 2 OS=Homo sapiens OX=9606 GN=NDUFAF2 PE=      | 0,005303594  | 0,026305 |
| Q5VV42 | Threonylcarbamoyladenosine tRNA methyltransferase OS=Homo sapiens OX=9606 GN=CKDL1 PE=1 SV=1                     | -0,009055165 | 0,026248 |
| P56211 | cAMP-regulated phosphoprotein 19 OS=Homo sapiens OX=9606 GN=ARPP19 PE=1 SV=2                                     | 0,008472122  | 0,026235 |
| Q96N66 | Lysophospholipid acyltransferase 7 OS=Homo sapiens OX=9606 GN=MBOAT7 PE=1 SV=2                                   | 0,004363609  | 0,026226 |
| Q9UKJ3 | G patch domain-containing protein 8 OS=Homo sapiens OX=9606 GN=GPATCH8 PE=1 SV=2                                 | 0,00871134   | 0,026126 |
| Q8IZP0 | Abi interactor 1 OS=Homo sapiens OX=9606 GN=ABI1 PE=1 SV=4                                                       | 0,005134889  | 0,025461 |
| O95714 | E3 ubiquitin-protein ligase HERC2 OS=Homo sapiens OX=9606 GN=HERC2 PE=1 SV=2                                     | -0,008488863 | 0,025453 |

|         |                                                                                                               |              |          |
|---------|---------------------------------------------------------------------------------------------------------------|--------------|----------|
| Q96E29  | Transcription termination factor 3, mitochondrial OS=Homo sapiens OX=9606 GN=MTERF3 PE=1 SV=2                 | 0,011284947  | 0,024867 |
| Q13643  | Four and a half LIM domains protein 3 OS=Homo sapiens OX=9606 GN=FHL3 PE=1 SV=4                               | 0,011239897  | 0,024766 |
| P51571  | Translocin-associated protein subunit delta OS=Homo sapiens OX=9606 GN=SSR4 PE=1 SV=1                         | -0,004943637 | 0,024505 |
| O15360  | Fanconi anemia group A protein OS=Homo sapiens OX=9606 GN=FANCA PE=1 SV=2                                     | 0,011036689  | 0,024315 |
| Q16629  | Serine/arginine-rich splicing factor 7 OS=Homo sapiens OX=9606 GN=SRSF7 PE=1 SV=1                             | -0,004272187 | 0,024259 |
| Q8WUUF5 | RelA-associated inhibitor OS=Homo sapiens OX=9606 GN=PPR1R13L PE=1 SV=4                                       | 0,003152606  | 0,024218 |
| Q5VT06  | Centrosome-associated protein 350 OS=Homo sapiens OX=9606 GN=CEP350 PE=1 SV=1                                 | -0,010923519 | 0,024064 |
| P07437  | Tubulin beta chain OS=Homo sapiens OX=9606 GN=TUBB PE=1 SV=2                                                  | 0,005847721  | 0,023999 |
| Q9NP79  | Vacuolar protein sorting-associated protein VTA1 homolog OS=Homo sapiens OX=9606 GN=VTA1 PE=1 SV=1            | 0,004482671  | 0,023889 |
| Q9BPZ7  | Target of rapamycin complex 2 subunit MAPKAP1 OS=Homo sapiens OX=9606 GN=MAPKAP1 PE=1 SV=2                    | -0,018043454 | 0,023483 |
| A5PLL7  | Transmembrane protein 189 OS=Homo sapiens OX=9606 GN=TMEM189 PE=1 SV=3                                        | 0,010583611  | 0,023309 |
| Q14156  | Protein EFR3 homolog A OS=Homo sapiens OX=9606 GN=EFR3A PE=1 SV=2                                             | -0,007667787 | 0,022972 |
| O60936  | Nucleolar protein 3 OS=Homo sapiens OX=9606 GN=NOL3 PE=1 SV=2                                                 | -0,007424372 | 0,022237 |
| Q16513  | Serine/threonine-protein kinase N2 OS=Homo sapiens OX=9606 GN=PKN2 PE=1 SV=1                                  | -0,010092923 | 0,022221 |
| Q68DQ2  | Very large A-kinase anchor protein OS=Homo sapiens OX=9606 GN=CRYBG3 PE=1 SV=3                                | 0,017662096  | 0,022178 |
| P08754  | Guanine nucleotide-binding protein G(i) subunit alpha OS=Homo sapiens OX=9606 GN=GNAI3 PE=1 SV=3              | 0,004852752  | 0,022007 |
| O43813  | Glutathione S-transferase LANCL1 OS=Homo sapiens OX=9606 GN=LANCL1 PE=1 SV=1                                  | -0,003295297 | 0,021772 |
| P50747  | Biotin--protein ligase OS=Homo sapiens OX=9606 GN=HLCS PE=1 SV=1                                              | -0,009831023 | 0,02164  |
| O95999  | B-cell lymphoma/leukemia 10 OS=Homo sapiens OX=9606 GN=BCL10 PE=1 SV=1                                        | 0,009702034  | 0,021354 |
| P62913  | 60S ribosomal protein L11 OS=Homo sapiens OX=9606 GN=RPL11 PE=1 SV=2                                          | 0,003674492  | 0,020841 |
| Q13153  | Serine/threonine-protein kinase PAK 1 OS=Homo sapiens OX=9606 GN=PAK1 PE=1 SV=2                               | 0,003847526  | 0,020481 |
| Q9NP97  | Dynein light chain roadblock-type 1 OS=Homo sapiens OX=9606 GN=DYNLRB1 PE=1 SV=3                              | 0,004109759  | 0,020343 |
| P50990  | T-complex protein 1 subunit theta OS=Homo sapiens OX=9606 GN=CCT8 PE=1 SV=4                                   | -0,001644295 | 0,020149 |
| Q9Y224  | RNA transcription, translation and transport factor protein OS=Homo sapiens OX=9606 GN=RTRAF PE=1 SV=1        | 0,003032768  | 0,020026 |
| P48509  | CD151 antigen OS=Homo sapiens OX=9606 GN=CD151 PE=1 SV=3                                                      | 0,004858523  | 0,019911 |
| P62306  | Small nuclear ribonucleoprotein F OS=Homo sapiens OX=9606 GN=SNRPF PE=1 SV=1                                  | -0,006377213 | 0,019081 |
| Q13574  | Diacylglycerol kinase zeta OS=Homo sapiens OX=9606 GN=DGKZ PE=1 SV=3                                          | 0,004360961  | 0,019026 |
| P08621  | U1 small nuclear ribonucleoprotein 70 kDa OS=Homo sapiens OX=9606 GN=SNRNP70 PE=1 SV=2                        | -0,002387317 | 0,018302 |
| Q6GQQ9  | OTU domain-containing protein 7B OS=Homo sapiens OX=9606 GN=OTUD7B PE=1 SV=1                                  | -0,005044576 | 0,018113 |
| Q61Q22  | Ras-related protein Rab-12 OS=Homo sapiens OX=9606 GN=RAB12 PE=1 SV=3                                         | 0,008145377  | 0,017907 |
| Q96142  | Thioredoxin domain-containing protein 15 OS=Homo sapiens OX=9606 GN=TXNDC15 PE=1 SV=1                         | 0,005929823  | 0,017734 |
| Q92734  | Protein TFG OS=Homo sapiens OX=9606 GN=TFG PE=1 SV=2                                                          | 0,002930462  | 0,017561 |
| P17948  | Vascular endothelial growth factor receptor 1 OS=Homo sapiens OX=9606 GN=FLT1 PE=1 SV=2                       | 0,007591315  | 0,017173 |
| Q06323  | Proteasome activator complex subunit 1 OS=Homo sapiens OX=9606 GN=PSME1 PE=1 SV=1                             | -0,002209035 | 0,016927 |
| Q9UKY7  | Protein CDV3 homolog OS=Homo sapiens OX=9606 GN=CDV3 PE=1 SV=1                                                | 0,002773317  | 0,016614 |
| P62888  | 60S ribosomal protein L30 OS=Homo sapiens OX=9606 GN=RPL30 PE=1 SV=2                                          | -0,003353487 | 0,016578 |
| P53801  | Pituitary tumor-transforming gene 1 protein-interacting protein OS=Homo sapiens OX=9606 GN=PTTG1IP PE=1 SV=1  | 0,0074795    | 0,016434 |
| P38435  | Vitamin K-dependent gamma-carboxylase OS=Homo sapiens OX=9606 GN=GGCX PE=1 SV=2                               | 0,005451671  | 0,016296 |
| P06753  | Tropomyosin alpha-3 chain OS=Homo sapiens OX=9606 GN=TPM3 PE=1 SV=2                                           | 0,004370255  | 0,015679 |
| P17050  | Alpha-N-acetylgalactosaminidase OS=Homo sapiens OX=9606 GN=NAGA PE=1 SV=2                                     | -0,007095374 | 0,015587 |
| Q969F9  | Herrmansky-Pudlak syndrome 3 protein OS=Homo sapiens OX=9606 GN=HPS3 PE=1 SV=1                                | -0,016505024 | 0,01549  |
| Q9H7Z7  | Prostaglandin E synthase 2 OS=Homo sapiens OX=9606 GN=PTGES2 PE=1 SV=1                                        | 0,004317305  | 0,015488 |
| Q9NSP4  | Centromere protein M OS=Homo sapiens OX=9606 GN=CENPM PE=1 SV=1                                               | -0,008641093 | 0,014965 |
| P01116  | GTPase KRas OS=Homo sapiens OX=9606 GN=KRAS PE=1 SV=1                                                         | 0,003637415  | 0,014882 |
| O14770  | Homeobox protein Meis2 OS=Homo sapiens OX=9606 GN=MEIS2 PE=1 SV=2                                             | -0,006564134 | 0,014414 |
| P06730  | Eukaryotic translation initiation factor 4E OS=Homo sapiens OX=9606 GN=EIF4E PE=1 SV=2                        | 0,002778663  | 0,013723 |
| Q9BRP8  | Partner of Y14 and mago OS=Homo sapiens OX=9606 GN=PYM1 PE=1 SV=1                                             | 0,003354872  | 0,01372  |
| Q969Q0  | 60S ribosomal protein L36a-like OS=Homo sapiens OX=9606 GN=RPL36AL PE=1 SV=3                                  | 0,003818568  | 0,01369  |
| P51636  | Caveolin-2 OS=Homo sapiens OX=9606 GN=CAV2 PE=1 SV=2                                                          | 0,006059414  | 0,013301 |
| P11171  | Protein 4.1 OS=Homo sapiens OX=9606 GN=EPB41 PE=1 SV=4                                                        | -0,00438861  | 0,013104 |
| Q6P4E1  | Protein CASC4 OS=Homo sapiens OX=9606 GN=CASC4 PE=1 SV=2                                                      | 0,005940663  | 0,013039 |
| P31323  | cAMP-dependent protein kinase type II-beta regulatory subunit OS=Homo sapiens OX=9606 GN=PRKAR2B PE=1 SV=3    | 0,004306413  | 0,012858 |
| O95429  | BAG family molecular chaperone regulator 4 OS=Homo sapiens OX=9606 GN=BAG4 PE=1 SV=1                          | -0,004279247 | 0,012776 |
| Q08623  | Pseudouridine-5'-phosphatase OS=Homo sapiens OX=9606 GN=PUDP PE=1 SV=3                                        | -0,00347158  | 0,012441 |
| P43243  | Matrin-3 OS=Homo sapiens OX=9606 GN=MATR3 PE=1 SV=2                                                           | 0,001084454  | 0,012386 |
| Q92934  | Bcl2-associated agonist of cell death OS=Homo sapiens OX=9606 GN=BAD PE=1 SV=3                                | -0,004057116 | 0,012111 |
| Q96HW7  | Integrator complex subunit 4 OS=Homo sapiens OX=9606 GN=INTS4 PE=1 SV=2                                       | -0,003940668 | 0,011761 |
| O75170  | Serine/threonine-protein phosphatase 6 regulatory subunit 2 OS=Homo sapiens OX=9606 GN=PPP6R2 PE=1 SV=2       | 0,005317788  | 0,011667 |
| P55786  | Puromycin-sensitive aminopeptidase OS=Homo sapiens OX=9606 GN=NPEPPS PE=1 SV=2                                | 0,000998442  | 0,0114   |
| P51965  | #N/D                                                                                                          | 0,002584486  | 0,010762 |
| P49756  | RNA-binding protein 25 OS=Homo sapiens OX=9606 GN=RBM25 PE=1 SV=3                                             | -0,001323731 | 0,010757 |
| P53680  | AP-2 complex subunit sigma OS=Homo sapiens OX=9606 GN=AP2S1 PE=1 SV=2                                         | 0,00296791   | 0,010629 |
| Q9H7B4  | Histone-lysine N-methyltransferase SMYD3 OS=Homo sapiens OX=9606 GN=SMYD3 PE=1 SV=4                           | -0,004829765 | 0,010592 |
| Q15369  | Elongin-C OS=Homo sapiens OX=9606 GN=ELOC PE=1 SV=1                                                           | -0,002517316 | 0,010283 |
| Q9Y2L1  | Exosome complex exonuclease RRP44 OS=Homo sapiens OX=9606 GN=DIS3 PE=1 SV=2                                   | 0,001733553  | 0,009795 |
| P18085  | ADP-ribosylation factor 4 OS=Homo sapiens OX=9606 GN=ARF4 PE=1 SV=3                                           | 0,001821278  | 0,009659 |
| Q7Z456  | Kinesin-like protein KIF21A OS=Homo sapiens OX=9606 GN=KIF21A PE=1 SV=2                                       | -0,002655095 | 0,009505 |
| P51668  | Ubiquitin-conjugating enzyme E2 D1 OS=Homo sapiens OX=9606 GN=UBE2D1 PE=1 SV=1                                | -0,004326432 | 0,009485 |
| P60903  | Protein S100-A10 OS=Homo sapiens OX=9606 GN=S100A10 PE=1 SV=2                                                 | -0,001738525 | 0,009219 |
| P54886  | Delta-1-pyrroline-5-carboxylate synthase OS=Homo sapiens OX=9606 GN=ALDH18A1 PE=1 SV=2                        | -0,000920052 | 0,009199 |
| Q9Y3L5  | Ras-related protein Rap-2c OS=Homo sapiens OX=9606 GN=RAP2C PE=1 SV=1                                         | -0,004038612 | 0,008852 |
| Q9NX20  | 39S ribosomal protein L16, mitochondrial OS=Homo sapiens OX=9606 GN=MRLP16 PE=1 SV=1                          | -0,002064463 | 0,008428 |
| Q96723  | Remodeling and spacing factor 1 OS=Homo sapiens OX=9606 GN=RSF1 PE=1 SV=2                                     | -0,00274795  | 0,008192 |
| A8MT19  | #N/D                                                                                                          | -0,00166087  | 0,008111 |
| P30085  | UMP-CMP kinase OS=Homo sapiens OX=9606 GN=CMPK1 PE=1 SV=3                                                     | -0,001308879 | 0,007817 |
| Q9HOC8  | Integrin-linked kinase-associated serine/threonine phosphatase 2C OS=Homo sapiens OX=9606 GN=ILKAP PE=1 SV=1  | -0,001128307 | 0,007418 |
| O15357  | Phosphatidylinositol 3,4,5-trisphosphate 5-phosphatase 2 OS=Homo sapiens OX=9606 GN=INPPL1 PE=1 SV=2          | -0,001042892 | 0,007149 |
| O95486  | Protein transport protein Sec24A OS=Homo sapiens OX=9606 GN=SEC24A PE=1 SV=2                                  | -0,000770216 | 0,006598 |
| P11166  | Solute carrier family 2, facilitated glucose transporter member 1 OS=Homo sapiens OX=9606 GN=SLC2A1 PE=1 SV=2 | 0,001456993  | 0,006591 |
| O43169  | Chromatin b5 type B OS=Homo sapiens OX=9606 GN=CYB5B PE=1 SV=3                                                | -0,001419525 | 0,006421 |
| Q70CQ2  | Ubiquitin carboxyl-terminal hydrolase 34 OS=Homo sapiens OX=9606 GN=USP34 PE=1 SV=2                           | -0,001206586 | 0,005943 |
| Q9H6F5  | Coiled-coil domain-containing protein 86 OS=Homo sapiens OX=9606 GN=CCDC86 PE=1 SV=1                          | 0,002925691  | 0,005755 |
| Q9H1Y0  | Autophagy protein 5 OS=Homo sapiens OX=9606 GN=ATG5 PE=1 SV=2                                                 | 0,00187432   | 0,005582 |
| Q9UHB7  | AF4/FMR2 family member 4 OS=Homo sapiens OX=9606 GN=AFF4 PE=1 SV=1                                            | -0,001593377 | 0,004744 |
| Q00059  | Transcription factor A, mitochondrial OS=Homo sapiens OX=9606 GN=TFAM PE=1 SV=1                               | 0,000875227  | 0,004634 |
| Q5VVQ8  | Disabled homolog 2-interacting protein OS=Homo sapiens OX=9606 GN=DAB2IP PE=1 SV=2                            | 0,002055357  | 0,004498 |
| Q9NXV2  | BTB/POZ domain-containing protein KCTD5 OS=Homo sapiens OX=9606 GN=KCTD5 PE=1 SV=1                            | 0,001957767  | 0,004284 |
| O15371  | Eukaryotic translation initiation factor 3 subunit D OS=Homo sapiens OX=9606 GN=EIF3D PE=1 SV=1               | -0,000445542 | 0,00391  |
| Q08752  | Peptidyl-prolyl cis-trans isomerase D OS=Homo sapiens OX=9606 GN=PPID PE=1 SV=3                               | -0,000588331 | 0,003863 |
| Q6NUQ1  | RAD50-interacting protein 1 OS=Homo sapiens OX=9606 GN=RINT1 PE=1 SV=1                                        | 0,002290852  | 0,003625 |
| P60228  | Eukaryotic translation initiation factor 3 subunit E OS=Homo sapiens OX=9606 GN=EIF3E PE=1 SV=1               | -0,00034411  | 0,003019 |

|        |                                                                                                                 |              |          |
|--------|-----------------------------------------------------------------------------------------------------------------|--------------|----------|
| P56381 | ATP synthase subunit epsilon, mitochondrial OS=Homo sapiens OX=9606 GN=ATP5F1E PE=1 SV=2                        | -0,001314407 | 0,002875 |
| Q92841 | Probable ATP-dependent RNA helicase DDX17 OS=Homo sapiens OX=9606 GN=DDX17 PE=1 SV=2                            | -0,000250424 | 0,00268  |
| Q9NP58 | ATP-binding cassette sub-family B member 6, mitochondrial OS=Homo sapiens OX=9606 GN=ABCB6 PE=1 SV=1            | -0,000463805 | 0,002282 |
| P19447 | General transcription and DNA repair factor IIH helicase subunit XPB OS=Homo sapiens OX=9606 GN=ERCC3 PE=1 SV=1 | -0,000972801 | 0,002127 |
| P15586 | N-acetylglucosamine-6-sulfatase OS=Homo sapiens OX=9606 GN=GNS PE=1 SV=3                                        | 0,000335926  | 0,002106 |
| Q9C098 | #N/D                                                                                                            | -0,003670086 | 0,001949 |
| Q16630 | Cleavage and polyadenylation specificity factor subunit 6 OS=Homo sapiens OX=9606 GN=CPSF6 PE=1 SV=2            | -0,0003236   | 0,001823 |
| Q9BUN8 | Derlin-1 OS=Homo sapiens OX=9606 GN=DERL1 PE=1 SV=1                                                             | -0,0005017   | 0,001791 |
| Q9UG01 | Intraflagellar transport protein 172 homolog OS=Homo sapiens OX=9606 GN=IFT172 PE=1 SV=2                        | -0,000771658 | 0,001687 |
| Q9HC38 | Glyoxalase domain-containing protein 4 OS=Homo sapiens OX=9606 GN=GLOD4 PE=1 SV=1                               | 0,000140034  | 0,000996 |
| Q9BYV8 | Centrosomal protein of 41 kDa OS=Homo sapiens OX=9606 GN=CEP41 PE=1 SV=1                                        | 0,000162414  | 0,000661 |
| Q14149 | MORC family CW-type zinc finger protein 3 OS=Homo sapiens OX=9606 GN=MORC3 PE=1 SV=3                            | -0,000119404 | 0,000426 |
| Q96959 | Ribosome-releasing factor 2, mitochondrial OS=Homo sapiens OX=9606 GN=GFM2 PE=1 SV=1                            | 4,79751E-05  | 0,000236 |
| Q15293 | Reticulocalbin-1 OS=Homo sapiens OX=9606 GN=RCN1 PE=1 SV=1                                                      | -2,77374E-05 | 0,000197 |
