# Supplementary material for: Selective cell cycle arrest in glioblastoma cell lines by quantum molecular resonance alone or in combination with temozolomide
Source: PubMed Central journal article supplement (PMC9427848; doi:10.1038/s41416-022-01865-9), 2022-06-17
Supplement: 41416_2022_1865_MOESM4_ESM.pdf [file 41416_2022_1865_MOESM4_ESM.pdf]

**Supplementary Table 3: List of proteins identified as differentially expressed between QMR-stimulated BM-MSCs and untreated BM-MSCs.**

For each protein, Master Protein Accessions number (Uniprot), Description, Prot. Fold change (QMR-stimulated cells/Untreated cells) and p-value are reported. Prot. Fold change are given as log2-fold changes, while p-value as -log2 (p-value). Statistical confidence was assessed when p-value < 0.05, corresponding to -log2 (p-value) of 4.32.

| Master Protein Accessions | Description                                                                                                              | Prot. Fold change (QMR/CON) | p-value  |
|---------------------------|--------------------------------------------------------------------------------------------------------------------------|-----------------------------|----------|
| Q09715                    | Collagen alpha-1(XII) chain OS=Homo sapiens OX=9606 GN=COL12A1 PE=1 SV=2                                                 | -0,758390162                | 57,70373 |
| P02452                    | Collagen alpha-1(I) chain OS=Homo sapiens OX=9606 GN=COL1A1 PE=1 SV=5                                                    | -0,754527554                | 45,72545 |
| P08123                    | Collagen alpha-2(I) chain OS=Homo sapiens OX=9606 GN=COL1A2 PE=1 SV=7                                                    | -0,711646487                | 41,66983 |
| Q92598                    | Heat shock protein 105 kDa OS=Homo sapiens OX=9606 GN=HSPH1 PE=1 SV=1                                                    | 1,126967004                 | 31,2417  |
| P0DMV8                    | Heat shock 70 kDa protein 1A OS=Homo sapiens OX=9606 GN=HSPA1A PE=1 SV=1                                                 | 0,896118186                 | 25,49714 |
| P14625                    | Endoplasmic reticulum chaperone protein OS=Homo sapiens OX=9606 GN=HSP90B1 PE=1 SV=1                                     | 0,490936114                 | 22,23891 |
| Q02790                    | Peptidyl-prolyl cis-trans isomerase FKBP4 OS=Homo sapiens OX=9606 GN=FKBP4 PE=1 SV=3                                     | 1,121903719                 | 21,48443 |
| P02751                    | Fibronectin OS=Homo sapiens OX=9606 GN=FN1 PE=1 SV=4                                                                     | -0,364299163                | 18,92638 |
| P13667                    | Protein disulfide-isomerase A4 OS=Homo sapiens OX=9606 GN=PDI4 PE=1 SV=2                                                 | 0,510793407                 | 17,79999 |
| P07900                    | Heat shock protein HSP 90-alpha OS=Homo sapiens OX=9606 GN=HSP90AA1 PE=1 SV=5                                            | 0,463011736                 | 17,48043 |
| P05997                    | Collagen alpha-2(V) chain OS=Homo sapiens OX=9606 GN=COL5A2 PE=1 SV=3                                                    | -0,919898616                | 13,25978 |
| P10809                    | 60 kDa heat shock protein, mitochondrial OS=Homo sapiens OX=9606 GN=HSPD1 PE=1 SV=2                                      | 0,410378827                 | 12,47751 |
| P14618                    | Pyruvate kinase PKM OS=Homo sapiens OX=9606 GN=PKM PE=1 SV=4                                                             | 0,368823932                 | 12,28614 |
| P08238                    | Heat shock protein HSP 90-beta OS=Homo sapiens OX=9606 GN=HSP90AB1 PE=1 SV=4                                             | 0,423588391                 | 11,32308 |
| Q9BV14                    | Nucleolar complex protein 4 homolog OS=Homo sapiens OX=9606 GN=NOC4L PE=1 SV=1                                           | 2,560963124                 | 11,05428 |
| P07942                    | Laminin subunit beta-1 OS=Homo sapiens OX=9606 GN=LAMB1 PE=1 SV=2                                                        | 0,484130322                 | 10,77715 |
| O94925                    | Glutaminase kidney isoform, mitochondrial OS=Homo sapiens OX=9606 GN=GLS PE=1 SV=1                                       | 0,511246151                 | 10,4096  |
| Q574B2                    | Inactive glycosyltransferase 25 family member 3 OS=Homo sapiens OX=9606 GN=CERCAM PE=1 SV=1                              | -0,962037358                | 10,12909 |
| P07237                    | Protein disulfide-isomerase OS=Homo sapiens OX=9606 GN=P4HB PE=1 SV=3                                                    | 0,364633371                 | 10,00287 |
| Q9UH18                    | A disintegrin and metalloproteinase with thrombospondin motifs 1 OS=Homo sapiens OX=9606 GN=ADAMTS1 PE=1 SV=4            | 0,544369375                 | 9,94744  |
| Q15113                    | Procollagen C-endopeptidase enhancer 1 OS=Homo sapiens OX=9606 GN=PCOLCE PE=1 SV=2                                       | -0,786224178                | 9,7646   |
| P29279                    | CCN family member 2 OS=Homo sapiens OX=9606 GN=CCN2 PE=1 SV=2                                                            | -0,594560748                | 9,671558 |
| P17813                    | Endoglin OS=Homo sapiens OX=9606 GN=ENG PE=1 SV=2                                                                        | 0,53898783                  | 9,429922 |
| P21980                    | Protein-glutamine gamma-glutamyltransferase 2 OS=Homo sapiens OX=9606 GN=TGM2 PE=1 SV=2                                  | 0,472303077                 | 9,365748 |
| Q32M74                    | Leucine-rich repeat flightless-interacting protein 1 OS=Homo sapiens OX=9606 GN=LRRFIP1 PE=1 SV=2                        | 0,578456668                 | 9,348843 |
| P16949                    | Stathmin OS=Homo sapiens OX=9606 GN=STMN1 PE=1 SV=3                                                                      | 1,096310084                 | 9,247624 |
| Q9P2E9                    | Ribosome-binding protein 1 OS=Homo sapiens OX=9606 GN=RRBP1 PE=1 SV=5                                                    | 0,271494322                 | 9,109877 |
| Q14240                    | Eukaryotic initiation factor 4A-II OS=Homo sapiens OX=9606 GN=EIF4A2 PE=1 SV=2                                           | 1,048874326                 | 8,892569 |
| P31948                    | Stress-induced-phosphoprotein 1 OS=Homo sapiens OX=9606 GN=STIP1 PE=1 SV=1                                               | 0,350539437                 | 8,835639 |
| P22626                    | Heterogeneous nuclear ribonucleoproteins A2/B1 OS=Homo sapiens OX=9606 GN=HNRNPA2B1 PE=1 SV=2                            | 0,488253268                 | 8,672425 |
| P16112                    | Aggrecan core protein OS=Homo sapiens OX=9606 GN=ACAN PE=1 SV=3                                                          | -0,499730295                | 8,552148 |
| P08195                    | 4F2 cell-surface antigen heavy chain OS=Homo sapiens OX=9606 GN=SLC3A2 PE=1 SV=3                                         | -0,433842492                | 8,347058 |
| Q13217                    | DnaJ homolog subfamily C member 3 OS=Homo sapiens OX=9606 GN=DNAJC3 PE=1 SV=1                                            | 0,564683426                 | 8,130898 |
| P46821                    | Microtubule-associated protein 1B OS=Homo sapiens OX=9606 GN=MAP1B PE=1 SV=2                                             | 0,196642498                 | 8,078958 |
| Q70E73                    | Ras-associated and pleckstrin homology domains-containing protein 1 OS=Homo sapiens OX=9606 GN=RAPH1 PE=1 SV=3           | -0,467818724                | 7,842566 |
| Q76M96                    | Coiled-coil domain-containing protein 80 OS=Homo sapiens OX=9606 GN=CCDC80 PE=1 SV=1                                     | -0,498094481                | 7,736092 |
| P06576                    | ATP synthase subunit beta, mitochondrial OS=Homo sapiens OX=9606 GN=ATP5F1B PE=1 SV=3                                    | 0,346464608                 | 7,625545 |
| P49257                    | Protein ERGIC-53 OS=Homo sapiens OX=9606 GN=LMAN1 PE=1 SV=2                                                              | 0,488603022                 | 7,546207 |
| P43243                    | Matrin-3 OS=Homo sapiens OX=9606 GN=MATR3 PE=1 SV=2                                                                      | 0,349294303                 | 7,49859  |
| Q9UHD1                    | Cysteine and histidine-rich domain-containing protein 1 OS=Homo sapiens OX=9606 GN=CHORDC1 PE=1 SV=2                     | 0,711697392                 | 7,435989 |
| P08243                    | Asparagine synthetase [glutamine-hydrolyzing] OS=Homo sapiens OX=9606 GN=ASNS PE=1 SV=1                                  | -0,38616819                 | 7,370111 |
| Q86VP6                    | Cullin-associated NEDD8-dissociated protein 1 OS=Homo sapiens OX=9606 GN=CAND1 PE=1 SV=2                                 | 0,260597439                 | 7,281411 |
| P06454                    | Prothymosin alpha OS=Homo sapiens OX=9606 GN=PTMA PE=1 SV=2                                                              | 1,112665098                 | 7,094421 |
| Q6EMK4                    | Vasorin OS=Homo sapiens OX=9606 GN=VASN PE=1 SV=1                                                                        | 0,681630431                 | 7,091688 |
| P00367                    | Glutamate dehydrogenase 1, mitochondrial OS=Homo sapiens OX=9606 GN=GLUD1 PE=1 SV=2                                      | 0,433367621                 | 7,083755 |
| O00499                    | Myc box-dependent-interacting protein 1 OS=Homo sapiens OX=9606 GN=BIN1 PE=1 SV=1                                        | 0,589831781                 | 7,054452 |
| P07093                    | Gli3-derived nexin OS=Homo sapiens OX=9606 GN=SERPINE2 PE=1 SV=1                                                         | 0,62075458                  | 6,940288 |
| Q13501                    | Sequestosome-1 OS=Homo sapiens OX=9606 GN=SQSTM1 PE=1 SV=1                                                               | 0,804709757                 | 6,910604 |
| Q16270                    | Insulin-like growth factor-binding protein 7 OS=Homo sapiens OX=9606 GN=IGFBP7 PE=1 SV=1                                 | -0,579213167                | 6,90364  |
| Q14204                    | Cytoplasmic dynein 1 heavy chain 1 OS=Homo sapiens OX=9606 GN=DYNC1H1 PE=1 SV=5                                          | 0,114461382                 | 6,748619 |
| Q14789                    | Golgin subfamily B member 1 OS=Homo sapiens OX=9606 GN=GOLGB1 PE=1 SV=2                                                  | 0,324370163                 | 6,742853 |
| Q9UH86                    | LIM domain and actin-binding protein 1 OS=Homo sapiens OX=9606 GN=LIMA1 PE=1 SV=1                                        | 0,328350921                 | 6,665372 |
| Q35Y69                    | Mitochondrial 10-formyltetrahydrofolate dehydrogenase OS=Homo sapiens OX=9606 GN=ALDH1L2 PE=1 SV=2                       | -0,280136603                | 6,658198 |
| Q92900                    | Regulator of nonsense transcripts 1 OS=Homo sapiens OX=9606 GN=UPF1 PE=1 SV=2                                            | 0,309374157                 | 6,654579 |
| Q9Y490                    | Talin 1 OS=Homo sapiens OX=9606 GN=TLN1 PE=1 SV=3                                                                        | 0,148156874                 | 6,593307 |
| Q9UDY4                    | DnaJ homolog subfamily B member 4 OS=Homo sapiens OX=9606 GN=DNAJB4 PE=1 SV=1                                            | 0,63390267                  | 6,537576 |
| O14974                    | Protein phosphatase 1 regulatory subunit 12A OS=Homo sapiens OX=9606 GN=PPP1R12A PE=1 SV=1                               | 0,270587373                 | 6,545599 |
| P52630                    | Signal transducer and activator of transcription 2 OS=Homo sapiens OX=9606 GN=STAT2 PE=1 SV=1                            | -0,583326416                | 6,454517 |
| P11142                    | Heat shock cognate 71 kDa protein OS=Homo sapiens OX=9606 GN=HSPA8 PE=1 SV=1                                             | 0,291864862                 | 6,436872 |
| P51452                    | Dual specificity protein phosphatase 3 OS=Homo sapiens OX=9606 GN=DUSP3 PE=1 SV=1                                        | 0,846428724                 | 6,423047 |
| Q9Y613                    | FH1/FH2 domain-containing protein 1 OS=Homo sapiens OX=9606 GN=FHOD1 PE=1 SV=3                                           | 0,513242559                 | 6,384057 |
| O15294                    | UDP-N-acetylglucosamine-peptide N-acetylglucosaminyltransferase 110 kDa subunit OS=Homo sapiens OX=9606 GN=OGT PE=1 SV=3 | 0,463235166                 | 6,331801 |
| Q8N857                    | Protein enabled homolog OS=Homo sapiens OX=9606 GN=ENAH PE=1 SV=2                                                        | 0,361982516                 | 6,264167 |
| Q9BXX5                    | Bcl-2-like protein 13 OS=Homo sapiens OX=9606 GN=BCL2L13 PE=1 SV=1                                                       | 0,956955429                 | 6,227803 |
| P20908                    | Collagen alpha-1(V) chain OS=Homo sapiens OX=9606 GN=COL5A1 PE=1 SV=3                                                    | -0,294384745                | 6,192377 |
| P02462                    | Collagen alpha-1(IV) chain OS=Homo sapiens OX=9606 GN=COL4A1 PE=1 SV=4                                                   | -0,601185431                | 6,153077 |
| Q9BZF9                    | Uveal autoantigen with coiled-coil domains and ankyrin repeats OS=Homo sapiens OX=9606 GN=UACA PE=1 SV=2                 | 0,403422016                 | 6,149411 |
| Q5T9A4                    | #N/D                                                                                                                     | 0,80712637                  | 6,131349 |
| Q13620                    | Cullin-4B OS=Homo sapiens OX=9606 GN=CUL4B PE=1 SV=4                                                                     | 0,32948603                  | 6,100697 |
| Q99497                    | Protein/nucleic acid deglycase DJ-1 OS=Homo sapiens OX=9606 GN=PARK7 PE=1 SV=2                                           | 0,396077386                 | 5,999289 |
| O00410                    | Importin-5 OS=Homo sapiens OX=9606 GN=IPO5 PE=1 SV=4                                                                     | 0,240400831                 | 5,998405 |
| Q92973                    | Transportin-1 OS=Homo sapiens OX=9606 GN=TNPO1 PE=1 SV=2                                                                 | 0,349544043                 | 5,967088 |
| O60884                    | DnaJ homolog subfamily A member 2 OS=Homo sapiens OX=9606 GN=DNAJA2 PE=1 SV=1                                            | 0,545380325                 | 5,958594 |
| Q8NI22                    | Multiple coagulation factor deficiency protein 2 OS=Homo sapiens OX=9606 GN=MCFD2 PE=1 SV=1                              | 0,901242773                 | 5,879994 |
| Q68EM7                    | Rho GTPase-activating protein 17 OS=Homo sapiens OX=9606 GN=ARHGAP17 PE=1 SV=1                                           | 0,687725859                 | 5,869281 |
| P61981                    | 14-3-3 protein gamma OS=Homo sapiens OX=9606 GN=YWHAG PE=1 SV=2                                                          | 0,479580969                 | 5,864598 |
| Q9Y4L1                    | Hypoxia up-regulated protein 1 OS=Homo sapiens OX=9606 GN=HYOU1 PE=1 SV=1                                                | 0,253146862                 | 5,85958  |
| Q9BUJ2                    | Heterogeneous nuclear ribonucleoprotein U-like protein 1 OS=Homo sapiens OX=9606 GN=HNRNPUL1 PE=1 SV=2                   | -0,478530359                | 5,848413 |
| Q96T23                    | Remodeling and spacing factor 1 OS=Homo sapiens OX=9606 GN=RSF1 PE=1 SV=2                                                | -1,1859986                  | 5,846452 |
| P13639                    | Elongation factor 2 OS=Homo sapiens OX=9606 GN=EEF2 PE=1 SV=4                                                            | 0,182132774                 | 5,839868 |
| Q01433                    | AMP deaminase 2 OS=Homo sapiens OX=9606 GN=AMPD2 PE=1 SV=2                                                               | 0,502137758                 | 5,803898 |
| P60709                    | Actin, cytoplasmic 1 OS=Homo sapiens OX=9606 GN=ACTB PE=1 SV=1                                                           | 0,275797474                 | 5,780478 |
| Q727H5                    | Transmembrane emp24 domain-containing protein 4 OS=Homo sapiens OX=9606 GN=TMED4 PE=1 SV=1                               | 0,567551783                 | 5,756438 |
| Q92888                    | Rho guanine nucleotide exchange factor 1 OS=Homo sapiens OX=9606 GN=ARHGEF1 PE=1 SV=2                                    | -0,383408867                | 5,741919 |
| P78559                    | Microtubule-associated protein 1A OS=Homo sapiens OX=9606 GN=MAP1A PE=1 SV=6                                             | 0,18883219                  | 5,721904 |
| O43681                    | ATPase ASNA1 OS=Homo sapiens OX=9606 GN=ASNA1 PE=1 SV=2                                                                  | 0,606062101                 | 5,66486  |
| P17480                    | Nucleolar transcription factor 1 OS=Homo sapiens OX=9606 GN=UBTF PE=1 SV=1                                               | -1,050014746                | 5,650917 |
| P22314                    | Ubiquitin-like modifier-activating enzyme 1 OS=Homo sapiens OX=9606 GN=UBA1 PE=1 SV=3                                    | 0,211729124                 | 5,601544 |
| Q08AF3                    | Schlafen family member 5 OS=Homo sapiens OX=9606 GN=SLFN5 PE=1 SV=1                                                      | -0,486071201                | 5,574479 |
| P43121                    | Cell surface glycoprotein MUC18 OS=Homo sapiens OX=9606 GN=MCAM PE=1 SV=2                                                | 0,374516717                 | 5,562553 |
| P26038                    | Moiesin OS=Homo sapiens OX=9606 GN=MSN PE=1 SV=3                                                                         | 0,246701734                 | 5,521339 |

|        |                                                                                                                   |              |          |
|--------|-------------------------------------------------------------------------------------------------------------------|--------------|----------|
| O75431 | Metaxin-2 OS=Homo sapiens OX=9606 GN=MTX2 PE=1 SV=1                                                               | -0,723907363 | 5,493771 |
| Q8NI36 | WD repeat-containing protein 36 OS=Homo sapiens OX=9606 GN=WDR36 PE=1 SV=1                                        | 0,715611478  | 5,476137 |
| P52306 | Rap1 GTPase-GDP dissociation stimulator 1 OS=Homo sapiens OX=9606 GN=RAP1GDS1 PE=1 SV=3                           | 0,346516461  | 5,425996 |
| Q60287 | Nucleolar pre-ribosomal-associated protein 1 OS=Homo sapiens OX=9606 GN=URB1 PE=1 SV=4                            | 0,167758294  | 5,41428  |
| Q9UIM3 | FK506-binding protein-like OS=Homo sapiens OX=9606 GN=FKBPL PE=1 SV=1                                             | 2,674607776  | 5,389842 |
| P54619 | 5'-AMP-activated protein kinase subunit gamma-1 OS=Homo sapiens OX=9606 GN=PRKAG1 PE=1 SV=1                       | -0,579216083 | 5,379203 |
| Q9BRK3 | Matrix remodeling-associated protein 8 OS=Homo sapiens OX=9606 GN=MXRA8 PE=1 SV=1                                 | 0,708422948  | 5,372241 |
| Q86UP2 | Kinectin OS=Homo sapiens OX=9606 GN=KTN1 PE=1 SV=1                                                                | 0,21696171   | 5,340509 |
| Q96CG8 | Collagen triple helix repeat-containing protein 1 OS=Homo sapiens OX=9606 GN=CTHRC1 PE=1 SV=1                     | -0,629204817 | 5,328407 |
| Q87C12 | Retinol dehydrogenase 11 OS=Homo sapiens OX=9606 GN=RDH11 PE=1 SV=2                                               | 0,793348255  | 5,228434 |
| P05198 | Eukaryotic translation initiation factor 2 subunit 1 OS=Homo sapiens OX=9606 GN=EIF2S1 PE=1 SV=3                  | 0,335988647  | 5,225976 |
| P78344 | AP-3 complex subunit beta-1 OS=Homo sapiens OX=9606 GN=EIF4G2 PE=1 SV=1                                           | 0,301703563  | 5,210931 |
| P54802 | Alpha-N-acetylglucosaminidase OS=Homo sapiens OX=9606 GN=NAGLU PE=1 SV=2                                          | -0,616415027 | 5,208668 |
| P14314 | Glycosidase 2 subunit beta OS=Homo sapiens OX=9606 GN=PRKCSH PE=1 SV=2                                            | 0,345147078  | 5,201705 |
| Q96GQ7 | Probable ATP-dependent RNA helicase DDX27 OS=Homo sapiens OX=9606 GN=DDX27 PE=1 SV=2                              | 0,941566243  | 5,149508 |
| P46777 | 60S ribosomal protein L5 OS=Homo sapiens OX=9606 GN=RPL5 PE=1 SV=3                                                | 0,340962114  | 5,115488 |
| O00203 | AP-3 complex subunit beta-1 OS=Homo sapiens OX=9606 GN=AP3B1 PE=1 SV=3                                            | -0,26738757  | 5,106687 |
| P04179 | Superoxide dismutase [Mn], mitochondrial OS=Homo sapiens OX=9606 GN=SOD2 PE=1 SV=3                                | -0,674135989 | 5,100664 |
| P78371 | T-complex protein 1 subunit beta OS=Homo sapiens OX=9606 GN=CCT2 PE=1 SV=4                                        | 0,266467529  | 5,081454 |
| Q92841 | Probable ATP-dependent RNA helicase DDX17 OS=Homo sapiens OX=9606 GN=DDX17 PE=1 SV=2                              | 0,276777081  | 5,06764  |
| P78318 | Immunoglobulin-binding protein 1 OS=Homo sapiens OX=9606 GN=IGBP1 PE=1 SV=1                                       | 1,218970547  | 5,059322 |
| Q9BXF6 | Rab11 family-interacting protein 5 OS=Homo sapiens OX=9606 GN=RAB11FIP5 PE=1 SV=1                                 | 0,509163178  | 5,057939 |
| P33316 | Deoxyuridine 5'-triphosphate nucleotidohydrolase, mitochondrial OS=Homo sapiens OX=9606 GN=DUT PE=1 SV=4          | 0,667673117  | 5,0483   |
| Q43252 | Bifunctional 3'-phosphoadenosine 5'-phosphosulfate synthase 1 OS=Homo sapiens OX=9606 GN=PAPSS1 PE=1 SV=2         | 0,360515081  | 5,042258 |
| P38919 | Eukaryotic initiation factor 4A-III OS=Homo sapiens OX=9606 GN=EIF4A3 PE=1 SV=4                                   | 0,507449419  | 5,037439 |
| Q96CV9 | Opiateurine OS=Homo sapiens OX=9606 GN=OPTN PE=1 SV=3                                                             | -0,347951681 | 5,033818 |
| P53801 | Pituitary tumor-transforming gene 1 protein-interacting protein OS=Homo sapiens OX=9606 GN=PTTG1IP PE=1 SV=1      | -1,206609568 | 5,021143 |
| Q9UH65 | Switch-associated protein 70 OS=Homo sapiens OX=9606 GN=SWAP70 PE=1 SV=1                                          | 0,505307297  | 5,011814 |
| Q9NTJ5 | Phosphatidylinositol phosphatase SAC1 OS=Homo sapiens OX=9606 GN=SACM1L PE=1 SV=2                                 | 0,358864955  | 5,011145 |
| Q02818 | Nucleobindin-1 OS=Homo sapiens OX=9606 GN=NUCB1 PE=1 SV=4                                                         | -0,315217349 | 4,976281 |
| P48643 | T-complex protein 1 subunit epsilon OS=Homo sapiens OX=9606 GN=CCT5 PE=1 SV=1                                     | 0,244182887  | 4,964566 |
| P34932 | Heat shock 70 kDa protein 4 OS=Homo sapiens OX=9606 GN=HSPA4 PE=1 SV=4                                            | 0,210716714  | 4,933427 |
| P07384 | Calpain-1 catalytic subunit OS=Homo sapiens OX=9606 GN=CAPN1 PE=1 SV=1                                            | 0,235350034  | 4,930358 |
| Q96JV6 | PDZ and LIM domain protein 2 OS=Homo sapiens OX=9606 GN=PLDML2 PE=1 SV=1                                          | -0,381253687 | 4,907357 |
| Q9NZ08 | Endoplasmic reticulum aminopeptidase 1 OS=Homo sapiens OX=9606 GN=ERAP1 PE=1 SV=3                                 | -0,533907557 | 4,89335  |
| Q92945 | Far upstream element-binding protein 2 OS=Homo sapiens OX=9606 GN=KHSRP PE=1 SV=4                                 | 0,310197528  | 4,866517 |
| Q43772 | Mitochondrial carnitine/acylcarnitine carrier protein OS=Homo sapiens OX=9606 GN=SLC25A20 PE=1 SV=1               | 0,881532567  | 4,85731  |
| O14925 | Endoplasmic reticulum import inner membrane translocase subunit Tim23 OS=Homo sapiens OX=9606 GN=TIMM23 PE=1 SV=1 | 0,439510472  | 4,854218 |
| Q86UV8 | 5'-nucleotidase domain-containing protein 3 OS=Homo sapiens OX=9606 GN=NT5DC3 PE=1 SV=1                           | -1,624655511 | 4,85233  |
| Q9Y6I3 | Epsin-1 OS=Homo sapiens OX=9606 GN=EPN1 PE=1 SV=2                                                                 | 0,734367348  | 4,845172 |
| P11021 | Endoplasmic reticulum chaperone BiP OS=Homo sapiens OX=9606 GN=HSPA5 PE=1 SV=2                                    | 0,218133877  | 4,806241 |
| Q13813 | Spectrin alpha chain, non-erythrocytic 1 OS=Homo sapiens OX=9606 GN=SPTAN1 PE=1 SV=3                              | -0,113793363 | 4,805853 |
| Q578P6 | RNA-binding protein 26 OS=Homo sapiens OX=9606 GN=RBM26 PE=1 SV=3                                                 | 0,499627566  | 4,800282 |
| Q12884 | Prolyl endopeptidase FAP OS=Homo sapiens OX=9606 GN=FAP PE=1 SV=5                                                 | -0,456440144 | 4,792228 |
| Q92845 | Kinesin-associated protein 3 OS=Homo sapiens OX=9606 GN=KIFAP3 PE=1 SV=2                                          | -1,132808485 | 4,787005 |
| Q6P996 | Pyridoxal-dependent decarboxylase domain-containing protein 1 OS=Homo sapiens OX=9606 GN=PDXDC1 PE=1 SV=2         | 0,346558188  | 4,780413 |
| P15586 | N-acetylglucosamine-6-sulfatase OS=Homo sapiens OX=9606 GN=GNS PE=1 SV=3                                          | -0,485567036 | 4,77565  |
| Q9UKX5 | Integrin alpha-11 OS=Homo sapiens OX=9606 GN=ITGA11 PE=1 SV=2                                                     | -0,265356179 | 4,72034  |
| P31751 | RAC-beta serine/threonine-protein kinase OS=Homo sapiens OX=9606 GN=AKT2 PE=1 SV=2                                | -0,858832315 | 4,744013 |
| P61086 | Ubiquitin-conjugating enzyme E2 K OS=Homo sapiens OX=9606 GN=UBE2K PE=1 SV=3                                      | 0,426115568  | 4,722954 |
| O60518 | Ran-binding protein 6 OS=Homo sapiens OX=9606 GN=RANBP6 PE=1 SV=2                                                 | 0,852463435  | 4,711945 |
| Q2NL82 | Pre-rRNA-processing protein TSR1 homolog OS=Homo sapiens OX=9606 GN=TSR1 PE=1 SV=1                                | -0,849754475 | 4,698268 |
| Q8WTS6 | Histone-lysine N-methyltransferase SETD7 OS=Homo sapiens OX=9606 GN=SETD7 PE=1 SV=1                               | -0,624133393 | 4,695993 |
| Q42026 | Transcription factor p65 OS=Homo sapiens OX=9606 GN=RELA PE=1 SV=2                                                | 0,402862377  | 4,693085 |
| Q13247 | Serine/arginine-rich splicing factor 6 OS=Homo sapiens OX=9606 GN=SRSF6 PE=1 SV=2                                 | 0,512960773  | 4,667626 |
| Q9UQ35 | Serine/arginine repetitive matrix protein 2 OS=Homo sapiens OX=9606 GN=SRRM2 PE=1 SV=2                            | 0,340082229  | 4,659973 |
| P17936 | Insulin-like growth factor-binding protein 3 OS=Homo sapiens OX=9606 GN=IGFBP3 PE=1 SV=2                          | -0,557732961 | 4,653413 |
| P49903 | Selenide, water dikinase 1 OS=Homo sapiens OX=9606 GN=SEPHS1 PE=1 SV=2                                            | -0,616330205 | 4,632227 |
| Q8IZ07 | Ankyrin repeat domain-containing protein 13A OS=Homo sapiens OX=9606 GN=ANKRD13A PE=1 SV=3                        | -0,613558264 | 4,609532 |
| P49915 | GMP synthase [glutamine-hydrolyzing] OS=Homo sapiens OX=9606 GN=GMPS PE=1 SV=1                                    | 0,336591201  | 4,595338 |
| P53396 | ATP-citrate synthase OS=Homo sapiens OX=9606 GN=ACLY PE=1 SV=3                                                    | 0,17299529   | 4,593979 |
| Q00839 | Heterogeneous nuclear ribonucleoprotein U OS=Homo sapiens OX=9606 GN=HNRNPU PE=1 SV=6                             | 0,281816344  | 4,576068 |
| P78527 | DNA-dependent protein kinase catalytic subunit OS=Homo sapiens OX=9606 GN=PRKDC PE=1 SV=3                         | -0,11450803  | 4,572523 |
| P06396 | Gelsolin OS=Homo sapiens OX=9606 GN=GSN PE=1 SV=1                                                                 | 0,257491695  | 4,571866 |
| P51178 | 1-phosphatidylinositol 4,5-bisphosphate phosphodiesterase delta-1 OS=Homo sapiens OX=9606 GN=PLCD1 PE=1 SV=2      | -0,466695043 | 4,550024 |
| P62269 | 40S ribosomal protein S18 OS=Homo sapiens OX=9606 GN=RPS18 PE=1 SV=3                                              | 0,437640495  | 4,546853 |
| Q15424 | Scaffold attachment factor B1 OS=Homo sapiens OX=9606 GN=SAFB PE=1 SV=4                                           | 0,437013514  | 4,538686 |
| P35613 | Basigin OS=Homo sapiens OX=9606 GN=BSG PE=1 SV=2                                                                  | -0,604441204 | 4,534731 |
| P19623 | Spermidine synthase OS=Homo sapiens OX=9606 GN=SRM PE=1 SV=1                                                      | -0,374491286 | 4,531655 |
| Q9UFNO | Protein NipSnap homolog 3A OS=Homo sapiens OX=9606 GN=NIPSNAP3A PE=1 SV=2                                         | -0,812652548 | 4,508698 |
| P59998 | Actin-related protein 2/3 complex subunit 4 OS=Homo sapiens OX=9606 GN=ARPC4 PE=1 SV=3                            | 0,542114899  | 4,50428  |
| Q9H357 | Tyrosine-protein phosphatase non-receptor type 23 OS=Homo sapiens OX=9606 GN=PTPN23 PE=1 SV=1                     | -0,49678687  | 4,492986 |
| Q9Y388 | Oligoribonuclease, mitochondrial OS=Homo sapiens OX=9606 GN=REXO2 PE=1 SV=3                                       | -0,433467343 | 4,492519 |
| Q15063 | Periostin OS=Homo sapiens OX=9606 GN=POSTN PE=1 SV=2                                                              | -0,496146444 | 4,48616  |
| P13861 | cAMP-dependent protein kinase type II-alpha regulatory subunit OS=Homo sapiens OX=9606 GN=PRKAR2A PE=1 SV=2       | -0,341911831 | 4,470916 |
| Q9BWF3 | RNA-binding protein 4 OS=Homo sapiens OX=9606 GN=RBM4 PE=1 SV=1                                                   | 0,536723187  | 4,452692 |
| Q9NQX3 | Gephyrin OS=Homo sapiens OX=9606 GN=GPHN PE=1 SV=1                                                                | -1,157357565 | 4,449531 |
| Q96QD8 | Sodium-coupled neutral amino acid transporter 2 OS=Homo sapiens OX=9606 GN=SLC38A2 PE=1 SV=2                      | 1,61230404   | 4,420164 |
| Q969X5 | Endoplasmic reticulum-Golgi intermediate compartment protein 1 OS=Homo sapiens OX=9606 GN=ERGIC1 PE=1 SV=1        | 0,455145796  | 4,412129 |
| Q9NQC3 | Reticulon-4 OS=Homo sapiens OX=9606 GN=RTN4 PE=1 SV=2                                                             | 0,403552982  | 4,405992 |
| Q69YQ0 | Cytospin-A OS=Homo sapiens OX=9606 GN=SPCC1L PE=1 SV=2                                                            | 0,425583135  | 4,390028 |
| Q92820 | Gamma-glutamyl hydrolase OS=Homo sapiens OX=9606 GN=GGH PE=1 SV=2                                                 | -0,586319958 | 4,385372 |
| A110T0 | Acetolactate synthase-like protein OS=Homo sapiens OX=9606 GN=LVBL PE=1 SV=2                                      | 0,452893223  | 4,385257 |
| Q92769 | Histone deacetylase 2 OS=Homo sapiens OX=9606 GN=HDAC2 PE=1 SV=2                                                  | 1,01350254   | 4,384984 |
| Q15084 | Protein disulfide-isomerase A6 OS=Homo sapiens OX=9606 GN=PDI6 PE=1 SV=1                                          | 0,31415583   | 4,379201 |
| P27824 | Calnexin OS=Homo sapiens OX=9606 GN=CANX PE=1 SV=2                                                                | 0,210188445  | 4,369415 |
| Q92783 | Signal transducing adapter molecule 1 OS=Homo sapiens OX=9606 GN=STAM PE=1 SV=3                                   | -0,484686101 | 4,362411 |
| Q9NRX2 | 39S ribosomal protein L17, mitochondrial OS=Homo sapiens OX=9606 GN=MRPL17 PE=1 SV=1                              | -1,294606889 | 4,356159 |
| O00170 | AH receptor-interacting protein OS=Homo sapiens OX=9606 GN=AIP PE=1 SV=2                                          | 0,449805298  | 4,348433 |
| O60493 | Sorting nexin-3 OS=Homo sapiens OX=9606 GN=SNX3 PE=1 SV=3                                                         | 0,525476376  | 4,34493  |
| Q14165 | Malectin OS=Homo sapiens OX=9606 GN=MLEC PE=1 SV=1                                                                | 0,361584186  | 4,327127 |
| Q8N183 | NADH dehydrogenase [ubiquinone] 1 alpha subcomplex assembly factor 2 OS=Homo sapiens OX=9606 GN=NDUFAF2 PE=1 SV=1 | 0,665655749  | 4,321578 |
| Q9NUP9 | Protein lin-7 homolog C OS=Homo sapiens OX=9606 GN=LIN7C PE=1 SV=1                                                | -0,775437409 | 4,314317 |
| Q9UIW2 | Plexin-A1 OS=Homo sapiens OX=9606 GN=PLXNA1 PE=1 SV=3                                                             | -0,140011856 | 4,311923 |
| Q9HA77 | Probable cysteine--tRNA ligase, mitochondrial OS=Homo sapiens OX=9606 GN=CAR52 PE=1 SV=1                          | 0,774288338  | 4,308248 |
| Q9H0U4 | Ras-related protein Rab-1B OS=Homo sapiens OX=9606 GN=RAB1B PE=1 SV=1                                             | 0,654529949  | 4,307687 |
| O75874 | Iso citrate dehydrogenase [NADP] cytoplasmic OS=Homo sapiens OX=9606 GN=IDH1 PE=1 SV=2                            | 0,331138763  | 4,282559 |
| P15848 | Arylsulfatase B OS=Homo sapiens OX=9606 GN=ARSB PE=1 SV=1                                                         | -0,476408644 | 4,273029 |

|         |                                                                                                                               |              |          |
|---------|-------------------------------------------------------------------------------------------------------------------------------|--------------|----------|
| Q6P1X6  | UPF0598 protein C8orf82 OS=Homo sapiens OX=9606 GN=C8orf82 PE=1 SV=2                                                          | 0,430889777  | 4,267842 |
| Q8WUHU6 | Transmembrane protein 263 OS=Homo sapiens OX=9606 GN=TMEM263 PE=1 SV=1                                                        | 0,765795526  | 4,263264 |
| O00116  | Alkylidihydroxyacetonephosphate synthase, peroxisomal OS=Homo sapiens OX=9606 GN=AGPS PE=1 SV=1                               | 0,392460783  | 4,251204 |
| Q06124  | Tyrosine-protein phosphatase non-receptor type 11 OS=Homo sapiens OX=9606 GN=PTPN11 PE=1 SV=2                                 | 0,307219821  | 4,247715 |
| P35222  | Catenin beta-1 OS=Homo sapiens OX=9606 GN=CTNNB1 PE=1 SV=1                                                                    | 0,226415952  | 4,238912 |
| O75116  | Rho-associated protein kinase 2 OS=Homo sapiens OX=9606 GN=ROCK2 PE=1 SV=4                                                    | -0,222457297 | 4,236234 |
| P08133  | Annexin A6 OS=Homo sapiens OX=9606 GN=ANXA6 PE=1 SV=3                                                                         | 0,164914251  | 4,221733 |
| Q9UHD8  | Septin-9 OS=Homo sapiens OX=9606 GN=SEPTIN9 PE=1 SV=2                                                                         | 0,225764191  | 4,221441 |
| P41252  | Isoleucine-tRNA ligase, cytoplasmic OS=Homo sapiens OX=9606 GN=IARS PE=1 SV=2                                                 | -0,189153994 | 4,21098  |
| P30154  | Serine/threonine-protein phosphatase 2A 65 kDa regulatory subunit A beta isoform OS=Homo sapiens OX=9606 GN=PPP2R1B PE=1 SV=1 | -0,370400663 | 4,207688 |
| O00232  | 26S proteasome non-ATPase regulatory subunit 12 OS=Homo sapiens OX=9606 GN=PSMD12 PE=1 SV=3                                   | -0,315232586 | 4,204651 |
| Q9NR50  | Translation initiation factor eIF-2B subunit gamma OS=Homo sapiens OX=9606 GN=EIF2B3 PE=1 SV=1                                | 0,411090904  | 4,202356 |
| Q99700  | Ataxin-2 OS=Homo sapiens OX=9606 GN=ATXN2 PE=1 SV=2                                                                           | 0,436978331  | 4,195675 |
| Q5EBL4  | RILP-like protein 1 OS=Homo sapiens OX=9606 GN=RILPL1 PE=1 SV=1                                                               | 0,563403176  | 4,195287 |
| Q8WU90  | Zinc finger CCH domain-containing protein 15 OS=Homo sapiens OX=9606 GN=ZC3H15 PE=1 SV=1                                      | 0,509491141  | 4,191466 |
| Q16850  | Lanosterol 14-alpha demethylase OS=Homo sapiens OX=9606 GN=CYP51A1 PE=1 SV=3                                                  | -0,561126681 | 4,176337 |
| Q9HDC9  | Adipocyte plasma membrane-associated protein OS=Homo sapiens OX=9606 GN=APMAP PE=1 SV=2                                       | 0,336948128  | 4,163987 |
| Q9Y6C2  | EMILIN-1 OS=Homo sapiens OX=9606 GN=EMILIN1 PE=1 SV=3                                                                         | 0,263452489  | 4,163705 |
| Q9HAU4  | E3 ubiquitin-protein ligase SMURF2 OS=Homo sapiens OX=9606 GN=SMURF2 PE=1 SV=1                                                | -0,631810846 | 4,151042 |
| Q8WUJ3  | Cell migration-inducing and hyaluronan-binding protein OS=Homo sapiens OX=9606 GN=CEMIP PE=1 SV=2                             | 0,245235914  | 4,142053 |
| Q8NBJ5  | Procollagen galactosyltransferase 1 OS=Homo sapiens OX=9606 GN=COLGALT1 PE=1 SV=1                                             | 0,291846288  | 4,131685 |
| P15170  | Eukaryotic peptide chain release factor GTP-binding subunit ERF3A OS=Homo sapiens OX=9606 GN=GSPT1 PE=1 SV=1                  | 0,311173073  | 4,131375 |
| Q96B96  | Dedicator of cytokinesis protein 10 OS=Homo sapiens OX=9606 GN=DOCK10 PE=1 SV=3                                               | 0,431234452  | 4,127392 |
| O60502  | Protein O-GlcNAcase OS=Homo sapiens OX=9606 GN=OGA PE=1 SV=2                                                                  | -0,430747752 | 4,12161  |
| P68402  | Platelet-activating factor acetylhydrolase IB subunit beta OS=Homo sapiens OX=9606 GN=PAFAH1B2 PE=1 SV=1                      | 0,553898546  | 4,116092 |
| Q14439  | G-protein coupled receptor 176 OS=Homo sapiens OX=9606 GN=GPR176 PE=2 SV=1                                                    | 0,488026932  | 4,101284 |
| P62899  | 60S ribosomal protein L31 OS=Homo sapiens OX=9606 GN=RPL31 PE=1 SV=1                                                          | 0,619472742  | 4,065311 |
| Q04446  | 1,4-alpha-glucan-branching enzyme OS=Homo sapiens OX=9606 GN=GBE1 PE=1 SV=3                                                   | 0,223809523  | 4,064681 |
| Q9NX62  | Inositol monophosphatase 3 OS=Homo sapiens OX=9606 GN=IMPAD1 PE=1 SV=1                                                        | -0,726618333 | 4,052907 |
| P67809  | Nuclease-sensitive element-binding protein 1 OS=Homo sapiens OX=9606 GN=YBX1 PE=1 SV=3                                        | 0,398475377  | 4,039545 |
| Q9NZM1  | Myoferlin OS=Homo sapiens OX=9606 GN=MYOF PE=1 SV=1                                                                           | -0,112907365 | 4,03368  |
| Q03013  | Glutathione S-transferase Mu 4 OS=Homo sapiens OX=9606 GN=GSTM4 PE=1 SV=3                                                     | 0,491906702  | 4,022346 |
| P19793  | Retinoid acid receptor RXR-alpha OS=Homo sapiens OX=9606 GN=RXRA PE=1 SV=1                                                    | 0,577757568  | 4,017954 |
| Q92839  | Hyaluronan synthase 1 OS=Homo sapiens OX=9606 GN=HAS1 PE=1 SV=2                                                               | 0,452608678  | 4,016208 |
| P55957  | BH3-interacting domain death agonist OS=Homo sapiens OX=9606 GN=BID PE=1 SV=1                                                 | 0,610501058  | 4,013562 |
| O60256  | Phosphoribosyl pyrophosphate synthase-associated protein 2 OS=Homo sapiens OX=9606 GN=PRPSAP2 PE=1 SV=1                       | -0,717610015 | 4,00388  |
| P46781  | 40S ribosomal protein S9 OS=Homo sapiens OX=9606 GN=RPS9 PE=1 SV=3                                                            | 0,314375737  | 3,99331  |
| P15104  | Glutamine synthetase OS=Homo sapiens OX=9606 GN=GLUL PE=1 SV=4                                                                | -0,708666408 | 3,954964 |
| Q8NH67  | ADP-ribosylation factor GTPase-activating protein 2 OS=Homo sapiens OX=9606 GN=ARFGAP2 PE=1 SV=1                              | -0,446561052 | 3,951032 |
| P13804  | Electron transfer flavoprotein subunit alpha, mitochondrial OS=Homo sapiens OX=9606 GN=ETFA PE=1 SV=1                         | 0,311775673  | 3,948889 |
| P05120  | Plasminogen activator inhibitor 2 OS=Homo sapiens OX=9606 GN=SERPINB2 PE=1 SV=2                                               | -0,3001931   | 3,934858 |
| P23246  | Splicing factor, proline- and glutamine-rich OS=Homo sapiens OX=9606 GN=SFPQ PE=1 SV=2                                        | 0,272900625  | 3,921141 |
| Q9ULI3  | Protein HEG homolog 1 OS=Homo sapiens OX=9606 GN=HEG1 PE=1 SV=3                                                               | 0,093873958  | 3,917097 |
| P27797  | Calreticulin OS=Homo sapiens OX=9606 GN=CALR PE=1 SV=1                                                                        | 0,235455168  | 3,910783 |
| Q72460  | CLIP-associating protein 1 OS=Homo sapiens OX=9606 GN=CLASP1 PE=1 SV=1                                                        | 0,528517676  | 3,903714 |
| Q8WZA9  | Immunity-related GTPase family Q protein OS=Homo sapiens OX=9606 GN=IRGQ PE=1 SV=1                                            | 0,477688257  | 3,885459 |
| Q9HD45  | Transmembrane 9 superfamily member 3 OS=Homo sapiens OX=9606 GN=TM9SF3 PE=1 SV=2                                              | 0,439817672  | 3,878416 |
| P52788  | Spermine synthase OS=Homo sapiens OX=9606 GN=SMS PE=1 SV=2                                                                    | 0,365464106  | 3,877988 |
| Q15393  | Splicing factor 3B subunit 3 OS=Homo sapiens OX=9606 GN=SF3B3 PE=1 SV=4                                                       | 0,270539573  | 3,874418 |
| Q8WXF1  | Paraspeckle component 1 OS=Homo sapiens OX=9606 GN=PSPC1 PE=1 SV=1                                                            | -0,524836469 | 3,872814 |
| Q16881  | Thioredoxin reductase 1, cytoplasmic OS=Homo sapiens OX=9606 GN=TXNRD1 PE=1 SV=3                                              | -0,256322148 | 3,871114 |
| O00299  | Chloride intracellular channel protein 1 OS=Homo sapiens OX=9606 GN=CLIC1 PE=1 SV=4                                           | -0,26994152  | 3,86261  |
| P46778  | 60S ribosomal protein L21 OS=Homo sapiens OX=9606 GN=RPL21 PE=1 SV=2                                                          | -0,5226457   | 3,854414 |
| O60218  | Allo-keto reductase family 1 member B10 OS=Homo sapiens OX=9606 GN=AKR1B10 PE=1 SV=2                                          | 0,766268274  | 3,849445 |
| O60763  | General vesicular transport factor p115 OS=Homo sapiens OX=9606 GN=USO1 PE=1 SV=2                                             | 0,21425913   | 3,820018 |
| Q9B0E3  | Tubulin alpha-1C chain OS=Homo sapiens OX=9606 GN=TUBA1C PE=1 SV=1                                                            | 0,683606778  | 3,816635 |
| P49770  | Translation initiation factor eIF-2B subunit beta OS=Homo sapiens OX=9606 GN=EIF2B2 PE=1 SV=3                                 | 0,470473807  | 3,815981 |
| Q9Y314  | Nitric oxide synthase-interacting protein OS=Homo sapiens OX=9606 GN=NOSIP PE=1 SV=1                                          | 0,682328428  | 3,809528 |
| Q9UBP6  | tRNA (guanine-N(7))-methyltransferase OS=Homo sapiens OX=9606 GN=METTL1 PE=1 SV=1                                             | -0,73546324  | 3,794525 |
| O43617  | Trafficking protein particle complex subunit 3 OS=Homo sapiens OX=9606 GN=TRAPPC3 PE=1 SV=1                                   | 0,579711077  | 3,786261 |
| P08670  | Vimentin OS=Homo sapiens OX=9606 GN=VIM PE=1 SV=4                                                                             | 0,140607369  | 3,786097 |
| O95232  | Luc7-like protein 3 OS=Homo sapiens OX=9606 GN=LUC7L3 PE=1 SV=2                                                               | 0,850903194  | 3,784829 |
| Q9Y4P1  | Cysteine protease ATG4B OS=Homo sapiens OX=9606 GN=ATG4B PE=1 SV=2                                                            | 0,677525356  | 3,782776 |
| Q9Y2Y0  | ADP-ribosylation factor-like protein 2-binding protein OS=Homo sapiens OX=9606 GN=ARL2BP PE=1 SV=1                            | -0,850112232 | 3,781752 |
| P62857  | 40S ribosomal protein S28 OS=Homo sapiens OX=9606 GN=RPS28 PE=1 SV=1                                                          | 0,677068873  | 3,780241 |
| P49411  | Elongation factor Tu, mitochondrial OS=Homo sapiens OX=9606 GN=TUFM PE=1 SV=2                                                 | 0,281830219  | 3,775786 |
| P04150  | Glucocorticoid receptor OS=Homo sapiens OX=9606 GN=NR3C1 PE=1 SV=1                                                            | -0,377849549 | 3,775355 |
| Q62M23  | Nesprin-3 OS=Homo sapiens OX=9606 GN=SYNE3 PE=1 SV=2                                                                          | -1,26011945  | 3,774474 |
| Q16740  | ATP-dependent Clp protease proteolytic subunit, mitochondrial OS=Homo sapiens OX=9606 GN=CLPP PE=1 SV=1                       | 0,57803748   | 3,774424 |
| Q9Y6G9  | Cytoplasmic dynein 1 light intermediate chain 1 OS=Homo sapiens OX=9606 GN=DYNC1L1 PE=1 SV=3                                  | 0,312843958  | 3,770956 |
| Q13630  | GDP-L-fucose synthase OS=Homo sapiens OX=9606 GN=TSTA3 PE=1 SV=1                                                              | -0,511871858 | 3,763821 |
| P51911  | Calponin-1 OS=Homo sapiens OX=9606 GN=CNN1 PE=1 SV=2                                                                          | 0,465015079  | 3,763412 |
| P32929  | Cystathionine gamma-lyase OS=Homo sapiens OX=9606 GN=CTH PE=1 SV=3                                                            | -0,844291798 | 3,75906  |
| O94855  | Protein transport protein Sec24D OS=Homo sapiens OX=9606 GN=SEC24D PE=1 SV=2                                                  | -0,239161686 | 3,758484 |
| P35998  | 26S proteasome regulatory subunit 7 OS=Homo sapiens OX=9606 GN=PSMC2 PE=1 SV=3                                                | 0,224206849  | 3,757465 |
| Q15582  | Transforming growth factor-beta-induced protein ig-h3 OS=Homo sapiens OX=9606 GN=TGFBI PE=1 SV=1                              | -0,219106265 | 3,740112 |
| P31689  | Dnal homolog subfamily A member 1 OS=Homo sapiens OX=9606 GN=DNAA1 PE=1 SV=2                                                  | 0,398477709  | 3,739927 |
| O00754  | Lysosomal alpha-mannosidase OS=Homo sapiens OX=9606 GN=MAN2B1 PE=1 SV=3                                                       | -0,397579497 | 3,729359 |
| P07099  | Epoxide hydrolase 1 OS=Homo sapiens OX=9606 GN=EPHX1 PE=1 SV=1                                                                | 0,288538309  | 3,729076 |
| Q5VTQ0  | Tetrapeptide repeat protein 39B OS=Homo sapiens OX=9606 GN=TTC39B PE=1 SV=4                                                   | -1,234854141 | 3,723078 |
| P49757  | Protein numb homolog OS=Homo sapiens OX=9606 GN=NUMB PE=1 SV=2                                                                | -0,835030552 | 3,722775 |
| Q5SSJ5  | Heterochromatin protein 1-binding protein 3 OS=Homo sapiens OX=9606 GN=HP1BP3 PE=1 SV=1                                       | -0,37364503  | 3,721817 |
| Q6NZY4  | Zinc finger CCHC domain-containing protein 8 OS=Homo sapiens OX=9606 GN=ZCCHC8 PE=1 SV=2                                      | -0,507114049 | 3,720005 |
| P84101  | Small EDRK-rich factor 2 OS=Homo sapiens OX=9606 GN=SERF2 PE=1 SV=1                                                           | 0,663721363  | 3,705555 |
| Q13838  | Pleiosome RNA helicase DDX39B OS=Homo sapiens OX=9606 GN=DDX39B PE=1 SV=1                                                     | 0,352787239  | 3,704741 |
| Q9B061  | Telomerase RNA component interacting RNase OS=Homo sapiens OX=9606 GN=TRIR PE=1 SV=1                                          | 0,663065897  | 3,701875 |
| Q96JB5  | CDK5 regulatory subunit-associated protein 3 OS=Homo sapiens OX=9606 GN=CDK5RAP3 PE=1 SV=2                                    | -0,335391865 | 3,695027 |
| P61224  | Ras-related protein Rap-1b OS=Homo sapiens OX=9606 GN=RAP1B PE=1 SV=1                                                         | 0,422502311  | 3,69232  |
| Q9P2Q2  | FERM domain-containing protein 4A OS=Homo sapiens OX=9606 GN=FRMD4A PE=1 SV=3                                                 | 0,888418434  | 3,683772 |
| Q727M9  | Polypeptide N-acetylglactosaminyltransferase 5 OS=Homo sapiens OX=9606 GN=GALNT5 PE=1 SV=1                                    | 0,369120009  | 3,664328 |
| O15357  | Phosphatidylinositol 3,4,5-trisphosphate 5-phosphatase 2 OS=Homo sapiens OX=9606 GN=INPPL1 PE=1 SV=2                          | 0,655696021  | 3,660403 |
| P46087  | Probable 28S rRNA (cytosine(4447)-C(5))-methyltransferase OS=Homo sapiens OX=9606 GN=NOP2 PE=1 SV=2                           | 0,419207759  | 3,656983 |
| P35611  | Alpha-adducin OS=Homo sapiens OX=9606 GN=ADD1 PE=1 SV=2                                                                       | 0,229339052  | 3,656924 |
| P21810  | Biglycan OS=Homo sapiens OX=9606 GN=BGN PE=1 SV=2                                                                             | 0,498050972  | 3,647378 |
| P98179  | RNA-binding protein 3 OS=Homo sapiens OX=9606 GN=RBM3 PE=1 SV=1                                                               | -0,497120742 | 3,639533 |
| Q12888  | TP53-binding protein 1 OS=Homo sapiens OX=9606 GN=TP53BP1 PE=1 SV=2                                                           | 0,293227576  | 3,635729 |
| Q07065  | Cytoskeleton-associated protein 4 OS=Homo sapiens OX=9606 GN=CKAP4 PE=1 SV=2                                                  | 0,187673657  | 3,634321 |
| Q96HC4  | PDZ and LIM domain protein 5 OS=Homo sapiens OX=9606 GN=PDLIM5 PE=1 SV=5                                                      | 0,206778217  | 3,632251 |

|        |                                                                                                                          |              |          |
|--------|--------------------------------------------------------------------------------------------------------------------------|--------------|----------|
| Q8TD16 | Protein bicaudal D homolog 2 OS=Homo sapiens OX=9606 GN=BICD2 PE=1 SV=1                                                  | 0,330188785  | 3,619987 |
| Q9NZW5 | MAGUK p55 subfamily member 6 OS=Homo sapiens OX=9606 GN=MPP6 PE=1 SV=2                                                   | -0,806262938 | 3,608673 |
| P04080 | Cystatin-B OS=Homo sapiens OX=9606 GN=CSTB PE=1 SV=2                                                                     | -0,644648863 | 3,597951 |
| Q15599 | Na(+)/H(+) exchange regulatory cofactor NHE-RF2 OS=Homo sapiens OX=9606 GN=SLC9A3R2 PE=1 SV=2                            | 0,413410621  | 3,59487  |
| Q8WX93 | Palladin OS=Homo sapiens OX=9606 GN=PALLD PE=1 SV=3                                                                      | 0,186219486  | 3,594174 |
| Q9ULX6 | A-kinase anchor protein 8-like OS=Homo sapiens OX=9606 GN-AKAP8L PE=1 SV=4                                               | 1,123578953  | 3,588139 |
| P21399 | Cytoplasmic aconitate hydratase OS=Homo sapiens OX=9606 GN=ACO1 PE=1 SV=3                                                | 0,312933657  | 3,574126 |
| O43795 | Unconventional myosin-Ib OS=Homo sapiens OX=9606 GN=MYO1B PE=1 SV=3                                                      | -0,177781469 | 3,573512 |
| P48163 | NADP-dependent malic enzyme OS=Homo sapiens OX=9606 GN=ME1 PE=1 SV=1                                                     | -0,326777202 | 3,570963 |
| P49748 | Very long-chain specific acyl-CoA dehydrogenase, mitochondrial OS=Homo sapiens OX=9606 GN=ACADVL PE=1 SV=1               | -0,207805755 | 3,564743 |
| O94979 | Protein transport protein Sec31A OS=Homo sapiens OX=9606 GN=SEC31A PE=1 SV=3                                             | 0,182094752  | 3,553939 |
| Q16512 | Serine/threonine-protein kinase N1 OS=Homo sapiens OX=9606 GN=PKN1 PE=1 SV=2                                             | -0,724540449 | 3,539533 |
| Q9BY42 | Replication termination factor 2 OS=Homo sapiens OX=9606 GN=RTF2 PE=1 SV=3                                               | 1,40098612   | 3,521601 |
| Q9Y4G6 | Talin-2 OS=Homo sapiens OX=9606 GN=TLN2 PE=1 SV=4                                                                        | -0,252179302 | 3,516987 |
| Q9BYX2 | TBC1 domain family member 2A OS=Homo sapiens OX=9606 GN=TBC1D2 PE=1 SV=3                                                 | -0,439032595 | 3,513345 |
| Q075C0 | Syntaxin-binding protein 5 OS=Homo sapiens OX=9606 GN=STXBPS PE=1 SV=1                                                   | 0,540789521  | 3,509294 |
| Q01581 | Dihydroxymethylglutaryl-CoA synthase, cytoplasmic OS=Homo sapiens OX=9606 GN=HMGC51 PE=1 SV=2                            | -1,510886329 | 3,506238 |
| O75844 | CAAX prenyl protease 1 homolog OS=Homo sapiens OX=9606 GN=ZMPSTE24 PE=1 SV=2                                             | 0,337399803  | 3,496446 |
| Q10588 | ADP-ribosyl cyclase/cyclic ADP-ribose hydrolase 2 OS=Homo sapiens OX=9606 GN=BST1 PE=1 SV=2                              | -0,626659629 | 3,495525 |
| Q9NX20 | 39S ribosomal protein L16, mitochondrial OS=Homo sapiens OX=9606 GN=MRPL16 PE=1 SV=1                                     | 1,097726088  | 3,491797 |
| P10915 | Hyaluronan and proteoglycan link protein 1 OS=Homo sapiens OX=9606 GN=HAPLN1 PE=2 SV=2                                   | -0,336934066 | 3,490178 |
| P35580 | Myosin-10 OS=Homo sapiens OX=9606 GN=MYH10 PE=1 SV=3                                                                     | 0,160352523  | 3,489874 |
| Q86VZ4 | Low-density lipoprotein receptor-related protein 11 OS=Homo sapiens OX=9606 GN=LRP11 PE=2 SV=2                           | -1,012453743 | 3,489618 |
| P53814 | Smoothelin OS=Homo sapiens OX=9606 GN=SMTN PE=1 SV=7                                                                     | 0,307173405  | 3,48715  |
| P35270 | Sepiapterin reductase OS=Homo sapiens OX=9606 GN=SPR PE=1 SV=1                                                           | 0,537623654  | 3,486621 |
| P40123 | Adenylyl cyclase-associated protein 2 OS=Homo sapiens OX=9606 GN=CAP2 PE=1 SV=1                                          | 0,354630779  | 3,48123  |
| P68104 | Elongation factor 1-alpha 1 OS=Homo sapiens OX=9606 GN=EEF1A1 PE=1 SV=1                                                  | 0,265399926  | 3,478841 |
| P50454 | Serpin H1 OS=Homo sapiens OX=9606 GN=SERPINH1 PE=1 SV=2                                                                  | 0,212116666  | 3,475635 |
| P55786 | Puromycin-sensitive aminopeptidase OS=Homo sapiens OX=9606 GN=NPEPPS PE=1 SV=2                                           | 0,200399785  | 3,474909 |
| O40483 | Dolichyl-diphosphooligosaccharide-protein glycosyltransferase subunit 1 OS=Homo sapiens OX=9606 GN=RPN1 PE=1 SV=1        | 0,196609388  | 3,467307 |
| P49593 | Protein phosphatase 1F OS=Homo sapiens OX=9606 GN=PPM1F PE=1 SV=3                                                        | 0,534398497  | 3,463503 |
| P31153 | S-adenosylmethionine synthase isoform type-2 OS=Homo sapiens OX=9606 GN=MAT2A PE=1 SV=1                                  | 0,318962258  | 3,459218 |
| Q99426 | Tubulin-folding cofactor B OS=Homo sapiens OX=9606 GN=TBCB PE=1 SV=2                                                     | 0,400447424  | 3,456316 |
| Q99598 | Translin-associated protein X OS=Homo sapiens OX=9606 GN=TSNAX PE=1 SV=1                                                 | -0,76616247  | 3,446064 |
| Q8IX30 | Signal peptide, CUB and EGF-like domain-containing protein 3 OS=Homo sapiens OX=9606 GN=SCUBE3 PE=1 SV=1                 | -0,292142748 | 3,441126 |
| P30279 | G1/S-specific cyclin-D2 OS=Homo sapiens OX=9606 GN=CCND2 PE=1 SV=1                                                       | 0,736876398  | 3,434588 |
| O15372 | Eukaryotic translation initiation factor 3 subunit H OS=Homo sapiens OX=9606 GN=EIF3H PE=1 SV=1                          | 0,2712093    | 3,428837 |
| Q75369 | Filamin-B OS=Homo sapiens OX=9606 GN=FLNB PE=1 SV=2                                                                      | -1,00192658  | 3,427645 |
| P39023 | 60S ribosomal protein L3 OS=Homo sapiens OX=9606 GN=RPL3 PE=1 SV=2                                                       | 0,262510113  | 3,42744  |
| Q15057 | Arf-GAP with coiled-coil, ANK repeat and PH domain-containing protein 2 OS=Homo sapiens OX=9606 GN=ACAP2 PE=1 SV=3       | 0,427993606  | 3,407272 |
| P00338 | L-lactate dehydrogenase A chain OS=Homo sapiens OX=9606 GN=LDHA PE=1 SV=2                                                | 0,227943986  | 3,402784 |
| O60762 | Dolichol-phosphate mannosyltransferase subunit 1 OS=Homo sapiens OX=9606 GN=DPM1 PE=1 SV=1                               | 0,467818071  | 3,392023 |
| Q6UB35 | Monofunctional C1-tetrahydrofolate synthase, mitochondrial OS=Homo sapiens OX=9606 GN=MTHFD1L PE=1 SV=1                  | -0,277868906 | 3,381691 |
| Q13740 | CD166 antigen OS=Homo sapiens OX=9606 GN=ALCAM PE=1 SV=2                                                                 | 0,267478548  | 3,365143 |
| P16615 | Sarcoplasmic/endoplasmic reticulum calcium ATPase 2 OS=Homo sapiens OX=9606 GN=ATP2A2 PE=1 SV=1                          | -0,170293516 | 3,360616 |
| Q8TE9X | Importin-4 OS=Homo sapiens OX=9606 GN=IPO4 PE=1 SV=2                                                                     | -0,286818524 | 3,35756  |
| P50570 | Dynamin-2 OS=Homo sapiens OX=9606 GN=DNM2 PE=1 SV=2                                                                      | 0,195231975  | 3,349324 |
| O00469 | Collagen-lysine,2-oxoglutarate 5-dioxygenase 2 OS=Homo sapiens OX=9606 GN=PLOD2 PE=1 SV=2                                | 0,195086694  | 3,345818 |
| O14907 | Tax1-binding protein 3 OS=Homo sapiens OX=9606 GN=TAX1BP3 PE=1 SV=2                                                      | 1,060226872  | 3,3346   |
| Q9UHW9 | Solute carrier family 12 member 6 OS=Homo sapiens OX=9606 GN=SLC12A6 PE=1 SV=2                                           | -0,823473375 | 3,334341 |
| Q8TAQ2 | SWI/SNF complex subunit SMARCC2 OS=Homo sapiens OX=9606 GN=SMARCC2 PE=1 SV=1                                             | 0,515535016  | 3,3279   |
| P00558 | Phosphoglycerate kinase 1 OS=Homo sapiens OX=9606 GN=PGK1 PE=1 SV=3                                                      | 0,205559239  | 3,326076 |
| P29966 | Myristoylated alanine-rich C-kinase substrate OS=Homo sapiens OX=9606 GN=MARCKS PE=1 SV=4                                | 0,324596122  | 3,324973 |
| Q5JTV8 | Torsin-1A-interacting protein 1 OS=Homo sapiens OX=9606 GN=TOR1AIP1 PE=1 SV=2                                            | 0,309484963  | 3,324783 |
| P52294 | Importin subunit alpha-5 OS=Homo sapiens OX=9606 GN=KPNA1 PE=1 SV=3                                                      | 0,736674239  | 3,323822 |
| O95340 | Bifunctional 3'-phosphoadenosine 5'-phosphosulfate synthase 2 OS=Homo sapiens OX=9606 GN=PAPSS2 PE=1 SV=2                | 0,2008739    | 3,309786 |
| P38606 | V-type proton ATPase catalytic subunit A OS=Homo sapiens OX=9606 GN=ATP6V1A PE=1 SV=2                                    | -0,213424964 | 3,307539 |
| O43847 | Nardilysin OS=Homo sapiens OX=9606 GN=NRDC PE=1 SV=3                                                                     | -0,262970255 | 3,288639 |
| Q9NRV9 | Heme-binding protein 1 OS=Homo sapiens OX=9606 GN=HEBP1 PE=1 SV=1                                                        | 0,338731322  | 3,282211 |
| Q27AA2 | Isoamyl acetate-hydrolyzing esterase 1 homolog OS=Homo sapiens OX=9606 GN=IAH1 PE=1 SV=1                                 | -0,587890465 | 3,271836 |
| Q03518 | Antigen peptide transporter 1 OS=Homo sapiens OX=9606 GN=TAP1 PE=1 SV=2                                                  | 0,724164385  | 3,271278 |
| P35579 | Myosin-9 OS=Homo sapiens OX=9606 GN=MYH9 PE=1 SV=4                                                                       | 0,091383769  | 3,270503 |
| Q13557 | Calcium/calmodulin-dependent protein kinase type II subunit delta OS=Homo sapiens OX=9606 GN=CAMK2D PE=1 SV=3            | 0,239001117  | 3,267201 |
| Q08211 | ATP-dependent RNA helicase A OS=Homo sapiens OX=9606 GN=DHX9 PE=1 SV=4                                                   | 0,164557804  | 3,261916 |
| P10253 | Lysosomal alpha-glucosidase OS=Homo sapiens OX=9606 GN=GAA PE=1 SV=4                                                     | 0,412152768  | 3,255361 |
| P43490 | Nicotinamide phosphoribosyltransferase OS=Homo sapiens OX=9606 GN=NAMPT PE=1 SV=1                                        | 0,336412041  | 3,25336  |
| Q16718 | NADH dehydrogenase [ubiquinone] 1 alpha subcomplex subunit 5 OS=Homo sapiens OX=9606 GN=NDUFA5 PE=1 SV=3                 | 0,584530103  | 3,252266 |
| Q03252 | Lamin-B2 OS=Homo sapiens OX=9606 GN=LMBN2 PE=1 SV=4                                                                      | 0,226032185  | 3,252121 |
| P16070 | CD44 antigen OS=Homo sapiens OX=9606 GN=CD44 PE=1 SV=3                                                                   | 0,318709389  | 3,246744 |
| O00291 | Huntingtin-interacting protein 1 OS=Homo sapiens OX=9606 GN=HIP1 PE=1 SV=5                                               | 0,279108914  | 3,237529 |
| Q9ULC4 | Malignant T-cell-amplified sequence 1 OS=Homo sapiens OX=9606 GN=MCTS1 PE=1 SV=1                                         | 0,449422574  | 3,236436 |
| Q8TF66 | Leucine-rich repeat-containing protein 15 OS=Homo sapiens OX=9606 GN=LRRIC15 PE=2 SV=2                                   | 0,335038945  | 3,236303 |
| Q9Y277 | Voltage-dependent anion-selective channel protein 3 OS=Homo sapiens OX=9606 GN=VDAC3 PE=1 SV=1                           | 0,35490949   | 3,231973 |
| O00592 | Podocalyxin OS=Homo sapiens OX=9606 GN=PODXL PE=1 SV=2                                                                   | 0,714628381  | 3,230951 |
| Q96552 | GPI transamidase component PIG-5 OS=Homo sapiens OX=9606 GN=PIGS PE=1 SV=3                                               | 0,408726386  | 3,222562 |
| O60814 | Histone H2B type 1-K OS=Homo sapiens OX=9606 GN=HIST1H2BK PE=1 SV=3                                                      | 0,447702013  | 3,221883 |
| Q6P119 | Parafibromin OS=Homo sapiens OX=9606 GN=CDC73 PE=1 SV=1                                                                  | 0,578740422  | 3,218483 |
| O76003 | Glutaredoxin-3 OS=Homo sapiens OX=9606 GN=GLRX3 PE=1 SV=2                                                                | 0,333058929  | 3,211736 |
| Q9Y4Z0 | U6 snRNA-associated Sm-like protein Lsm4 OS=Homo sapiens OX=9606 GN=LSM4 PE=1 SV=1                                       | 0,709023027  | 3,207136 |
| Q07666 | KU domain-containing, RNA-binding, signal transduction-associated protein 1 OS=Homo sapiens OX=9606 GN=KHDRBS1 PE=1 SV=1 | 0,445899042  | 3,206633 |
| P43686 | 26S proteasome regulatory subunit 6B OS=Homo sapiens OX=9606 GN=PSM6C4 PE=1 SV=2                                         | 0,21789671   | 3,196932 |
| Q9Y4D7 | Plexin-D1 OS=Homo sapiens OX=9606 GN=PLXND1 PE=1 SV=3                                                                    | 0,24188478   | 3,194692 |
| Q6NYC1 | Bifunctional arginine demethylase and lysyl-hydroxylase JMJD6 OS=Homo sapiens OX=9606 GN=JMJD6 PE=1 SV=1                 | 1,00059173   | 3,192756 |
| O75935 | Dynactin subunit 3 OS=Homo sapiens OX=9606 GN=DCTN3 PE=1 SV=1                                                            | 0,403711164  | 3,174598 |
| Q99707 | Methionine synthase OS=Homo sapiens OX=9606 GN=MTR PE=1 SV=2                                                             | -0,733518279 | 3,174066 |
| O94874 | E3 UFM1-protein ligase 1 OS=Homo sapiens OX=9606 GN=UFL1 PE=1 SV=2                                                       | -0,255856984 | 3,168987 |
| Q9Y394 | Dehydrogenase/reductase SDR family member 7 OS=Homo sapiens OX=9606 GN=DHRS7 PE=1 SV=1                                   | 0,440268855  | 3,159016 |
| Q724W1 | L-xylose reductase OS=Homo sapiens OX=9606 GN=DXR PE=1 SV=2                                                              | -0,491764524 | 3,156195 |
| P30101 | Protein disulfide-isomerase A3 OS=Homo sapiens OX=9606 GN=PDI3 PE=1 SV=4                                                 | 0,180173716  | 3,140024 |
| Q9BWD1 | Acetyl-CoA acetyltransferase, cytosolic OS=Homo sapiens OX=9606 GN=ACAT2 PE=1 SV=2                                       | 0,370250906  | 3,13586  |
| Q14997 | Proteasome activator complex subunit 4 OS=Homo sapiens OX=9606 GN=PSME4 PE=1 SV=2                                        | -0,488143488 | 3,12997  |
| Q9UH62 | Armadillo repeat-containing X-linked protein 3 OS=Homo sapiens OX=9606 GN=ARMCX3 PE=1 SV=1                               | 0,325794347  | 3,121916 |
| Q8NB7J | Inactive C-alpha-formylglycine-generating enzyme 2 OS=Homo sapiens OX=9606 GN=SUMF2 PE=1 SV=2                            | -0,435652464 | 3,119981 |
| Q9UBI6 | Guanine nucleotide-binding protein G(I)/G(S)/G(O) subunit gamma-12 OS=Homo sapiens OX=9606 GN=GNG12 PE=1 SV=3            | 0,964408413  | 3,103789 |
| O60610 | Protein diaphanous homolog 1 OS=Homo sapiens OX=9606 GN=DIAPH1 PE=1 SV=2                                                 | 0,218406459  | 3,102001 |
| Q13310 | Polyadenylation-binding protein 4 OS=Homo sapiens OX=9606 GN=PABPC4 PE=1 SV=1                                            | 0,270053802  | 3,098074 |
| Q13546 | Receptor-interacting serine/threonine-protein kinase 1 OS=Homo sapiens OX=9606 GN=RIPK1 PE=1 SV=3                        | 0,483596303  | 3,097015 |
| Q8IY17 | Neuropathy target esterase OS=Homo sapiens OX=9606 GN=PNPLA6 PE=1 SV=3                                                   | 0,366542026  | 3,096767 |

|         |                                                                                                                           |              |          |
|---------|---------------------------------------------------------------------------------------------------------------------------|--------------|----------|
| Q7KZF4  | Staphylococcal nuclease domain-containing protein 1 OS=Homo sapiens OX=9606 GN=SND1 PE=1 SV=1                             | 0,145783639  | 3,095065 |
| P02511  | Alpha-crystallin B chain OS=Homo sapiens OX=9606 GN=CRYAB PE=1 SV=2                                                       | 0,250835806  | 3,085325 |
| Q9HD26  | Golgi-associated PDZ and coiled-coil motif-containing protein OS=Homo sapiens OX=9606 GN=GOPC PE=1 SV=1                   | 0,341339194  | 3,076106 |
| Q5GLZ8  | Probable E3 ubiquitin-protein ligase HERC4 OS=Homo sapiens OX=9606 GN=HERC4 PE=1 SV=1                                     | -0,194141062 | 3,071359 |
| P49756  | RNA-binding protein 25 OS=Homo sapiens OX=9606 GN=RBM25 PE=1 SV=3                                                         | 0,305151177  | 3,068133 |
| Q9NVL4  | Peptidyl-prolyl cis-trans isomerase FKBP11 OS=Homo sapiens OX=9606 GN=FKBP11 PE=1 SV=1                                    | -0,478437238 | 3,059597 |
| Q9NVW70 | Exocyst complex component 1 OS=Homo sapiens OX=9606 GN=EXOC1 PE=1 SV=4                                                    | 0,42834883   | 3,058245 |
| Q8IXM2  | Chromatin complexes subunit BAP18 OS=Homo sapiens OX=9606 GN=BAP18 PE=1 SV=1                                              | -0,870102668 | 3,057001 |
| Q9Y678  | Coatomer subunit gamma-1 OS=Homo sapiens OX=9606 GN=COPG1 PE=1 SV=1                                                       | 0,142879042  | 3,054945 |
| O60841  | Eukaryotic translation initiation factor 5B OS=Homo sapiens OX=9606 GN=EIF5B PE=1 SV=4                                    | 0,221102817  | 3,046648 |
| O15270  | Serine palmitoyltransferase 2 OS=Homo sapiens OX=9606 GN=SPTLC2 PE=1 SV=1                                                 | -0,426136669 | 3,039552 |
| P22692  | Insulin-like growth factor-binding protein 4 OS=Homo sapiens OX=9606 GN=IGFBP4 PE=1 SV=2                                  | 0,475347381  | 3,037173 |
| Q2TAA5  | GDP-Man:Man(3)GlcNAc(2)-PP-Dol alpha-1,2-mannosyltransferase OS=Homo sapiens OX=9606 GN=ALG11 PE=1 SV=2                   | -0,382588869 | 3,035292 |
| Q9GZM5  | Protein YIPF3 OS=Homo sapiens OX=9606 GN=YIPF3 PE=1 SV=1                                                                  | 0,935900029  | 3,032083 |
| P17987  | T-complex protein 1 subunit alpha OS=Homo sapiens OX=9606 GN=TCP1 PE=1 SV=1                                               | 0,175729938  | 3,032066 |
| Q9P2B4  | CTTNBP2 N-terminal-like protein OS=Homo sapiens OX=9606 GN=CTTNBP2NL PE=1 SV=2                                            | 0,318311597  | 3,029935 |
| Q15365  | Poly(rC)-binding protein 1 OS=Homo sapiens OX=9606 GN=PCBP1 PE=1 SV=2                                                     | 0,318102639  | 3,027375 |
| Q5JPE7  | Nodal modulator 2 OS=Homo sapiens OX=9606 GN=NOMO2 PE=1 SV=1                                                              | 0,188134057  | 3,02058  |
| P26599  | Polypyrimidine tract-binding protein 1 OS=Homo sapiens OX=9606 GN=PTBP1 PE=1 SV=1                                         | 0,232030552  | 3,018825 |
| Q9Y217  | Myotubularin-related protein 6 OS=Homo sapiens OX=9606 GN=MTMR6 PE=1 SV=3                                                 | -0,541760152 | 3,008847 |
| Q9UK45  | U6 snRNA-associated Sm-like protein Lsm7 OS=Homo sapiens OX=9606 GN=LSM7 PE=1 SV=1                                        | 0,541739321  | 3,000691 |
| Q9P686  | Enhancer of mRNA-decapping protein 3 OS=Homo sapiens OX=9606 GN=EDC3 PE=1 SV=1                                            | 0,660211399  | 2,996309 |
| Q9GZT8  | NIF3-like protein 1 OS=Homo sapiens OX=9606 GN=NIF3L1 PE=1 SV=2                                                           | -0,658923442 | 2,990663 |
| P67812  | Signal peptidase complex catalytic subunit SEC11A OS=Homo sapiens OX=9606 GN=SEC11A PE=1 SV=1                             | 0,419838957  | 2,986359 |
| P07339  | Cathepsin D OS=Homo sapiens OX=9606 GN=CTSD PE=1 SV=1                                                                     | -0,230187026 | 2,986278 |
| Q8IVF2  | Protein AHNK2 OS=Homo sapiens OX=9606 GN=AHNK2 PE=1 SV=2                                                                  | -0,244716635 | 2,984284 |
| Q13405  | 39S ribosomal protein L49, mitochondrial OS=Homo sapiens OX=9606 GN=MRPL49 PE=1 SV=1                                      | -0,916959958 | 2,983637 |
| Q8NHV4  | Protein NEDD1 OS=Homo sapiens OX=9606 GN=NEDD1 PE=1 SV=1                                                                  | 0,229149174  | 2,96663  |
| Q9NQW6  | Anillin OS=Homo sapiens OX=9606 GN=ANLN PE=1 SV=2                                                                         | 0,354135476  | 2,966495 |
| P49753  | Acyl-coenzyme A thioesterase 2, mitochondrial OS=Homo sapiens OX=9606 GN=ACOT2 PE=1 SV=6                                  | -1,389756853 | 2,965842 |
| Q9BYT8  | Neurolysin, mitochondrial OS=Homo sapiens OX=9606 GN=NLN PE=1 SV=1                                                        | -0,283559948 | 2,963641 |
| P27694  | Replication protein A 70 kDa DNA-binding subunit OS=Homo sapiens OX=9606 GN=RPA1 PE=1 SV=2                                | -0,297135336 | 2,963623 |
| P36542  | ATP synthase subunit gamma, mitochondrial OS=Homo sapiens OX=9606 GN=ATP5F1C PE=1 SV=1                                    | 0,330970398  | 2,957922 |
| Q6PD74  | Alpha- and gamma-adaptin-binding protein p34 OS=Homo sapiens OX=9606 GN=AAGAB PE=1 SV=1                                   | -1,563931893 | 2,952116 |
| Q16678  | Cytochrome P450 1B1 OS=Homo sapiens OX=9606 GN=CYP1B1 PE=1 SV=2                                                           | -0,330220928 | 2,949412 |
| P51809  | Vesicle-associated membrane protein 7 OS=Homo sapiens OX=9606 GN=VAMP7 PE=1 SV=3                                          | 0,649351733  | 2,948571 |
| Q9C0C9  | (E3-independent) E2 ubiquitin-conjugating enzyme OS=Homo sapiens OX=9606 GN=UBE2O PE=1 SV=3                               | 0,462690553  | 2,945231 |
| Q14123  | Calcium/calmodulin-dependent 3',5'-cyclic nucleotide phosphodiesterase 1C OS=Homo sapiens OX=9606 GN=PDE1C PE=1 SV=1      | 0,46247107   | 2,943635 |
| Q9HOW8  | Protein SMG9 OS=Homo sapiens OX=9606 GN=SMG9 PE=1 SV=1                                                                    | -0,900424504 | 2,940804 |
| O43290  | U4/U6.U5 tri-snRNP-associated protein 1 OS=Homo sapiens OX=9606 GN=SART1 PE=1 SV=1                                        | 0,378639329  | 2,935768 |
| O14787  | Transportin-2 OS=Homo sapiens OX=9606 GN=TNPO2 PE=1 SV=3                                                                  | -0,378109973 | 2,930745 |
| P08240  | Signal recognition particle receptor subunit alpha OS=Homo sapiens OX=9606 GN=SRPRA PE=1 SV=2                             | 0,209549904  | 2,930695 |
| P63261  | Actin, cytoplasmic 2 OS=Homo sapiens OX=9606 GN=ACTG1 PE=1 SV=1                                                           | 0,529099506  | 2,925649 |
| Q9HC07  | Transmembrane protein 165 OS=Homo sapiens OX=9606 GN=TMEM165 PE=1 SV=1                                                    | 0,529011743  | 2,925127 |
| Q9UBB6  | Neurochondrin OS=Homo sapiens OX=9606 GN=NCDN PE=1 SV=1                                                                   | -0,309520406 | 2,922606 |
| Q10713  | Mitochondrial-processing peptidase subunit alpha OS=Homo sapiens OX=9606 GN=PMPCA PE=1 SV=2                               | -0,411918226 | 2,919511 |
| Q9UHB9  | Signal recognition particle subunit SRP68 OS=Homo sapiens OX=9606 GN=SRP68 PE=1 SV=2                                      | 0,232982989  | 2,915164 |
| P26006  | Integrin alpha-3 OS=Homo sapiens OX=9606 GN=ITGA3 PE=1 SV=5                                                               | -0,293315784 | 2,914122 |
| O00443  | Phosphatidylinositol 4-phosphate 3-kinase C2 domain-containing subunit alpha OS=Homo sapiens OX=9606 GN=PIK3C2A PE=1 SV=2 | 0,311591543  | 2,912324 |
| O43765  | Small glutamine-rich tetratricopeptide repeat-containing protein alpha OS=Homo sapiens OX=9606 GN=SGTA PE=1 SV=1          | 0,348567488  | 2,908299 |
| P17342  | Atrial natriuretic peptide receptor 3 OS=Homo sapiens OX=9606 GN=NPR3 PE=1 SV=2                                           | -0,325821265 | 2,899549 |
| O60888  | Protein CutA OS=Homo sapiens OX=9606 GN=CUTA PE=1 SV=2                                                                    | -0,883762857 | 2,89713  |
| O00429  | Dynamin-1-like protein OS=Homo sapiens OX=9606 GN=DNM1L PE=1 SV=2                                                         | 0,162238588  | 2,89677  |
| P51858  | Hepatoma-derived growth factor OS=Homo sapiens OX=9606 GN=HDGF PE=1 SV=1                                                  | 0,256290178  | 2,889417 |
| Q02543  | 60S ribosomal protein L18a OS=Homo sapiens OX=9606 GN=RPL18A PE=1 SV=2                                                    | 0,372664181  | 2,879103 |
| Q8IWC1  | MAP7 domain-containing protein 3 OS=Homo sapiens OX=9606 GN=MAP7D3 PE=1 SV=2                                              | 0,111824669  | 2,877358 |
| Q9H1P3  | Oxysterol-binding protein-related protein 2 OS=Homo sapiens OX=9606 GN=OSBP2L PE=1 SV=1                                   | 0,666210861  | 2,872357 |
| Q9ULZ3  | Apoptosis-associated speck-like protein containing a CARD OS=Homo sapiens OX=9606 GN=PYCARD PE=1 SV=2                     | -0,452307667 | 2,869719 |
| P55287  | Cadherin-11 OS=Homo sapiens OX=9606 GN=CDH11 PE=1 SV=2                                                                    | 0,37165154   | 2,869541 |
| Q8IYB3  | Serine/arginine repetitive matrix protein 1 OS=Homo sapiens OX=9606 GN=SRRM1 PE=1 SV=2                                    | 0,630748655  | 2,866102 |
| Q969P0  | Immunoglobulin superfamily member 8 OS=Homo sapiens OX=9606 GN=IGSF8 PE=1 SV=1                                            | 0,618167064  | 2,865338 |
| P25685  | Dnaj homolog subfamily B member 1 OS=Homo sapiens OX=9606 GN=DNAJB1 PE=1 SV=4                                             | 0,370882256  | 2,862261 |
| P52758  | 2-iminobutanoate/2-iminopropanoate deaminase OS=Homo sapiens OX=9606 GN=RIDA PE=1 SV=1                                    | -0,628507401 | 2,856107 |
| Q12906  | Interleukin enhancer-binding factor 3 OS=Homo sapiens OX=9606 GN=ILF3 PE=1 SV=3                                           | 0,183980635  | 2,850953 |
| Q9UK56  | Protein kinase C and casein kinase substrate in neurons protein 3 OS=Homo sapiens OX=9606 GN=PACSIN3 PE=1 SV=2            | 0,865498618  | 2,848653 |
| Q5VYK3  | Proteasome adapter and scaffold protein ECM29 OS=Homo sapiens OX=9606 GN=ECPAS PE=1 SV=2                                  | -0,179923679 | 2,839382 |
| P46108  | Adapter molecule crk OS=Homo sapiens OX=9606 GN=CRK PE=1 SV=2                                                             | 0,287478785  | 2,838862 |
| Q16851  | UTP-glucose-1-phosphate uridylyltransferase OS=Homo sapiens OX=9606 GN=UGP2 PE=1 SV=5                                     | 0,199813805  | 2,837735 |
| Q9H173  | Nucleotide exchange factor SIL1 OS=Homo sapiens OX=9606 GN=SIL1 PE=1 SV=1                                                 | -0,513730413 | 2,833938 |
| Q9Y6M1  | Insulin-like growth factor 2 mRNA-binding protein 2 OS=Homo sapiens OX=9606 GN=IGF2BP2 PE=1 SV=2                          | -0,287001181 | 2,832724 |
| Q8TF42  | Ubiquitin-associated and SH3 domain-containing protein B OS=Homo sapiens OX=9606 GN=UBASH3B PE=1 SV=2                     | -0,401434871 | 2,831151 |
| Q969V3  | Nicalin OS=Homo sapiens OX=9606 GN=NCLN PE=1 SV=2                                                                         | -0,243255801 | 2,828772 |
| P46934  | E3 ubiquitin-protein ligase NEDD4 OS=Homo sapiens OX=9606 GN=NEDD4 PE=1 SV=4                                              | -0,511726609 | 2,821948 |
| O95202  | Mitochondrial proton/calcium exchanger protein OS=Homo sapiens OX=9606 GN=LETM1 PE=1 SV=1                                 | 0,285423208  | 2,812471 |
| O75396  | Vesicle-trafficking protein SEC22b OS=Homo sapiens OX=9606 GN=SEC22B PE=1 SV=4                                            | 0,30037946   | 2,811897 |
| O75607  | Nucleoplasmin-3 OS=Homo sapiens OX=9606 GN=NPM3 PE=1 SV=3                                                                 | 0,616538019  | 2,805522 |
| P35606  | Coatomer subunit beta' OS=Homo sapiens OX=9606 GN=COPB2 PE=1 SV=2                                                         | 0,14775235   | 2,802439 |
| C9JLW8  | Mapk-regulated corepressor-interacting protein 1 OS=Homo sapiens OX=9606 GN=MCRIPI1 PE=1 SV=1                             | -0,507748518 | 2,798123 |
| Q9UK76  | Jupiter microtubule associated homolog 1 OS=Homo sapiens OX=9606 GN=JPT1 PE=1 SV=3                                        | 0,397246861  | 2,795896 |
| Q5SRE5  | Nucleoporin NUP188 homolog OS=Homo sapiens OX=9606 GN=NUP188 PE=1 SV=1                                                    | -0,845229809 | 2,794104 |
| Q8IWX3  | Ankyrin repeat and KH domain-containing protein 1 OS=Homo sapiens OX=9606 GN=ANKHD1 PE=1 SV=1                             | 0,506461784  | 2,790411 |
| O60499  | Syntaxin-10 OS=Homo sapiens OX=9606 GN=STX10 PE=1 SV=1                                                                    | 0,085287991  | 2,785756 |
| P07686  | Beta-hexosaminidase subunit beta OS=Homo sapiens OX=9606 GN=HEXB PE=1 SV=3                                                | -0,283056903 | 2,782165 |
| P84157  | Matrix-remodeling-associated protein 7 OS=Homo sapiens OX=9606 GN=MXRA7 PE=1 SV=1                                         | 0,439624145  | 2,777403 |
| P52594  | Arf-GAP domain and FG repeat-containing protein 1 OS=Homo sapiens OX=9606 GN=AGFG1 PE=1 SV=2                              | 0,50362136   | 2,773377 |
| Q13509  | Tubulin beta-3 chain OS=Homo sapiens OX=9606 GN=TUBB3 PE=1 SV=2                                                           | 0,231608824  | 2,771344 |
| Q9H299  | SH3 domain-binding glutamic acid-rich-like protein 3 OS=Homo sapiens OX=9606 GN=SH3BGL3 PE=1 SV=1                         | 0,360892579  | 2,767918 |
| O75962  | Triple functional domain protein OS=Homo sapiens OX=9606 GN=TRIO PE=1 SV=1                                                | -0,239185906 | 2,765691 |
| Q9NRY4  | Rho GTPase-activating protein 35 OS=Homo sapiens OX=9606 GN=ARHGAP35 PE=1 SV=3                                            | -0,239082405 | 2,764092 |
| P61513  | 60S ribosomal protein L37a OS=Homo sapiens OX=9606 GN=RPL37A PE=1 SV=2                                                    | 0,437601723  | 2,762679 |
| Q8TD43  | Transient receptor potential cation channel subfamily M member 4 OS=Homo sapiens OX=9606 GN=TRPM4 PE=1 SV=1               | -0,6070486   | 2,759788 |
| O94921  | Cyclin-dependent kinase 14 OS=Homo sapiens OX=9606 GN=CDK14 PE=1 SV=3                                                     | 0,287296903  | 2,758018 |
| Q6P1N9  | Putative deoxyribonuclease TATDN1 OS=Homo sapiens OX=9606 GN=TATDN1 PE=1 SV=2                                             | -0,831706229 | 2,757263 |
| P10109  | Adrenodoxin, mitochondrial OS=Homo sapiens OX=9606 GN=FDX1 PE=1 SV=1                                                      | -0,517545063 | 2,754487 |
| P20839  | Inosine-5'-monophosphate dehydrogenase 1 OS=Homo sapiens OX=9606 GN=IMPDH1 PE=1 SV=2                                      | 0,333724095  | 2,754051 |
| P48960  | CD97 antigen OS=Homo sapiens OX=9606 GN=CD97 PE=1 SV=4                                                                    | 0,392156178  | 2,753082 |
| Q8NOX7  | Spartin OS=Homo sapiens OX=9606 GN=SPART PE=1 SV=1                                                                        | 0,435595018  | 2,748068 |
| P50281  | Matrix metalloproteinase-14 OS=Homo sapiens OX=9606 GN=MMP14 PE=1 SV=3                                                    | -0,35857385  | 2,746075 |

|         |                                                                                                                                |              |          |
|---------|--------------------------------------------------------------------------------------------------------------------------------|--------------|----------|
| P19174  | 1-phosphatidylinositol 4,5-bisphosphate phosphodiesterase gamma-1 OS=Homo sapiens OX=9606 GN=PLCG1 PE=1 SV=1                   | 0,603887088  | 2,745502 |
| P43003  | Excitatory amino acid transporter 1 OS=Homo sapiens OX=9606 GN=SLC1A3 PE=1 SV=1                                                | 0,237124622  | 2,744122 |
| Q72417  | Nuclear fragile X mental retardation-interacting protein 2 OS=Homo sapiens OX=9606 GN=NUIFIP2 PE=1 SV=1                        | 0,390878419  | 2,742343 |
| P13995  | Bifunctional methylenetetrahydrofolate dehydrogenase/cyclohydrolase, mitochondrial OS=Homo sapiens OX=9606 GN=MTHFD2 PE=1 S    | -0,390723378 | 2,74104  |
| Q96N66  | Lysophospholipid acyltransferase 7 OS=Homo sapiens OX=9606 GN=MBOAT7 PE=1 SV=2                                                 | -0,434427078 | 2,739564 |
| Q9Y680  | Peptidyl-prolyl cis-trans isomerase FKBP7 OS=Homo sapiens OX=9606 GN=FKBP7 PE=1 SV=2                                           | -0,331776525 | 2,733916 |
| O43143  | Pre-mRNA-splicing factor ATP-dependent RNA helicase DHX15 OS=Homo sapiens OX=9606 GN=DHX15 PE=1 SV=2                           | 0,204217912  | 2,733729 |
| O75390  | Citrate synthase, mitochondrial OS=Homo sapiens OX=9606 GN=CS PE=1 SV=2                                                        | 0,22896357   | 2,728967 |
| Q53E16  | Programmed cell death protein 4 OS=Homo sapiens OX=9606 GN=PDCD4 PE=1 SV=2                                                     | -1,02943166  | 2,726158 |
| Q9UK41  | Vacuolar protein sorting-associated protein 28 homolog OS=Homo sapiens OX=9606 GN=VPS28 PE=1 SV=1                              | -0,432191767 | 2,723288 |
| P49321  | Nuclear autoantigenic sperm protein OS=Homo sapiens OX=9606 GN=NASP PE=1 SV=2                                                  | 0,278338601  | 2,72198  |
| Q9BTY2  | Plasma alpha-L-fucosidase OS=Homo sapiens OX=9606 GN=FUCA2 PE=1 SV=2                                                           | -0,81548608  | 2,720943 |
| O94829  | Importin-13 OS=Homo sapiens OX=9606 GN=IPO13 PE=1 SV=3                                                                         | -0,845049424 | 2,717845 |
| Q8IXL7  | Methionine-R-sulfoxide reductase B3 OS=Homo sapiens OX=9606 GN=MSRB3 PE=1 SV=2                                                 | -0,494040084 | 2,715817 |
| P09104  | Gamma-enolase OS=Homo sapiens OX=9606 GN=ENO2 PE=1 SV=3                                                                        | 0,265249644  | 2,715011 |
| Q9Y5K6  | CD2-associated protein OS=Homo sapiens OX=9606 GN=CD2AP PE=1 SV=1                                                              | 0,329834353  | 2,713862 |
| P30566  | Adenylosuccinate lyase OS=Homo sapiens OX=9606 GN=ADSL PE=1 SV=2                                                               | 0,235658517  | 2,711367 |
| Q15363  | Transmembrane emp24 domain-containing protein 2 OS=Homo sapiens OX=9606 GN=TMED2 PE=1 SV=1                                     | 0,354358185  | 2,706421 |
| Q9Y316  | Protein MEMO1 OS=Homo sapiens OX=9606 GN=MEMO1 PE=1 SV=1                                                                       | 0,329095601  | 2,706224 |
| O43237  | Cytoplasmic dynein 1 light intermediate chain 2 OS=Homo sapiens OX=9606 GN=DYNC1L12 PE=1 SV=1                                  | 0,276970523  | 2,70459  |
| Q9UM47  | Neurogenic locus notch homolog protein 3 OS=Homo sapiens OX=9606 GN=NOTCH3 PE=1 SV=2                                           | -0,353944824 | 2,702536 |
| O95757  | Heat shock 70 kDa protein 4L OS=Homo sapiens OX=9606 GN=HSPA4L PE=1 SV=3                                                       | 0,594205927  | 2,701607 |
| Q9Y296  | Trafficking protein particle complex subunit 4 OS=Homo sapiens OX=9606 GN=TRAPP4 PE=1 SV=1                                     | -0,594035899 | 2,700834 |
| O43447  | Peptidyl-prolyl cis-trans isomerase H OS=Homo sapiens OX=9606 GN=PIIH PE=1 SV=1                                                | -0,810166678 | 2,697837 |
| Q9NUQ7  | Ufm1-specific protease 2 OS=Homo sapiens OX=9606 GN=UFS2 PE=1 SV=3                                                             | 0,384226197  | 2,686485 |
| P13611  | Versican core protein OS=Homo sapiens OX=9606 GN=VCAN PE=1 SV=3                                                                | 0,233920353  | 2,684719 |
| R08648  | Integrin alpha-5 OS=Homo sapiens OX=9606 GN=ITGA5 PE=1 SV=2                                                                    | 0,226050279  | 2,682532 |
| P07814  | Bifunctional glutamate/proline-tRNA ligase OS=Homo sapiens OX=9606 GN=EPRS PE=1 SV=5                                           | -0,108890573 | 2,681323 |
| O00471  | Exocyst complex component 5 OS=Homo sapiens OX=9606 GN=EXOC5 PE=1 SV=1                                                         | -0,383337947 | 2,679033 |
| Q10I85  | Nucleolysin TIAR OS=Homo sapiens OX=9606 GN=TIAL1 PE=1 SV=1                                                                    | -0,306119901 | 2,678317 |
| Q9BR73  | Migration and invasion enhancer 1 OS=Homo sapiens OX=9606 GN=MIEN1 PE=1 SV=1                                                   | -0,802617429 | 2,67679  |
| P04632  | Calpain small subunit 1 OS=Homo sapiens OX=9606 GN=CAPNS1 PE=1 SV=1                                                            | 0,262336263  | 2,675984 |
| R38936  | Cyclin-dependent kinase inhibitor 1 OS=Homo sapiens OX=9606 GN=CDKN1A PE=1 SV=3                                                | 0,623088824  | 2,674201 |
| Q3KQU3  | MAP7 domain-containing protein 1 OS=Homo sapiens OX=9606 GN=MAP7D1 PE=1 SV=1                                                   | 0,288500441  | 2,669468 |
| Q8WWW1  | LIM domain only protein 7 OS=Homo sapiens OX=9606 GN=LMO7 PE=1 SV=3                                                            | -0,106890722 | 2,667356 |
| P08253  | 72 kDa type IV collagenase OS=Homo sapiens OX=9606 GN=MMP2 PE=1 SV=2                                                           | 0,381750202  | 2,665717 |
| Q14669  | E3 ubiquitin-protein ligase TRIP12 OS=Homo sapiens OX=9606 GN=TRIP12 PE=1 SV=1                                                 | 0,349697223  | 2,662666 |
| P27708  | CAD protein OS=Homo sapiens OX=9606 GN=CAD PE=1 SV=3                                                                           | 0,171649479  | 2,660988 |
| Q9NWX15 | Anoctamin-10 OS=Homo sapiens OX=9606 GN=ANO10 PE=1 SV=2                                                                        | 0,380927723  | 2,658821 |
| O75937  | Dnal homolog subfamily C member 8 OS=Homo sapiens OX=9606 GN=DNAJ8 PE=1 SV=2                                                   | 0,484189589  | 2,656489 |
| P55809  | Succinyl-CoA:3-ketoacid coenzyme A transferase 1, mitochondrial OS=Homo sapiens OX=9606 GN=OXCT1 PE=1 SV=1                     | -0,304114526 | 2,655998 |
| Q92688  | Acidic leucine-rich nuclear phosphoprotein 32 family member B OS=Homo sapiens OX=9606 GN=ANP32B PE=1 SV=1                      | -0,583433803 | 2,652502 |
| Q8NBS9  | Thioredoxin domain-containing protein 5 OS=Homo sapiens OX=9606 GN=TXNDC5 PE=1 SV=2                                            | -0,217123172 | 2,650952 |
| P19823  | Inter-alpha-trypsin inhibitor heavy chain H2 OS=Homo sapiens OX=9606 GN=ITH2 PE=1 SV=2                                         | 0,34804334   | 2,647164 |
| Q14766  | Latent-transforming growth factor beta-binding protein 1 OS=Homo sapiens OX=9606 GN=LGBP1 PE=1 SV=4                            | -0,420600988 | 2,647073 |
| Q9HBL8  | NmrA-like family domain-containing protein 1 OS=Homo sapiens OX=9606 GN=NMRL1 PE=1 SV=1                                        | -0,631806903 | 2,646467 |
| Q658P3  | Metalloendopeptidase STEAP3 OS=Homo sapiens OX=9606 GN=STEAP3 PE=1 SV=2                                                        | -1,725912727 | 2,646102 |
| P20700  | Lamin-B1 OS=Homo sapiens OX=9606 GN=LMBN1 PE=1 SV=2                                                                            | 0,185443421  | 2,643797 |
| Q9BTW9  | Tubulin-specific chaperone D OS=Homo sapiens OX=9606 GN=TBCD PE=1 SV=2                                                         | -0,272100283 | 2,642912 |
| Q13136  | Liprin-alpha-1 OS=Homo sapiens OX=9606 GN=PPP1A1 PE=1 SV=1                                                                     | 0,421125351  | 2,64271  |
| Q8TCT9  | Minor histocompatibility antigen H13 OS=Homo sapiens OX=9606 GN=HM13 PE=1 SV=1                                                 | 0,302662436  | 2,639861 |
| Q96C77  | Coiled-coil domain-containing protein 124 OS=Homo sapiens OX=9606 GN=CCDC124 PE=1 SV=1                                         | 0,346648942  | 2,634104 |
| Q6UVK1  | Chondroitin sulfate proteoglycan 4 OS=Homo sapiens OX=9606 GN=CSPG4 PE=1 SV=2                                                  | -0,12454878  | 2,631712 |
| Q13643  | Four and a half LIM domains protein 3 OS=Homo sapiens OX=9606 GN=FHL3 PE=1 SV=4                                                | -0,377601872 | 2,630952 |
| P62253  | Ubiquitin-conjugating enzyme E2 G1 OS=Homo sapiens OX=9606 GN=UBE2G1 PE=1 SV=3                                                 | -0,479896103 | 2,630585 |
| Q9P291  | Armadiillo repeat-containing X-linked protein 1 OS=Homo sapiens OX=9606 GN=ARMCX1 PE=1 SV=1                                    | 0,345902453  | 2,627116 |
| Q6ZWT7  | Lysophospholipid acyltransferase 2 OS=Homo sapiens OX=9606 GN=MBOAT2 PE=2 SV=2                                                 | 0,783246623  | 2,622256 |
| Q9NUJ3  | T-complex protein 11-like protein 1 OS=Homo sapiens OX=9606 GN=TCP11L1 PE=1 SV=1                                               | -0,783174177 | 2,622051 |
| Q9HD42  | Charged multivesicular body protein 1a OS=Homo sapiens OX=9606 GN=CHMP1A PE=1 SV=1                                             | -0,47835814  | 2,621299 |
| Q9Y4X5  | E3 ubiquitin-protein ligase ARIH1 OS=Homo sapiens OX=9606 GN=ARIH1 PE=1 SV=2                                                   | -0,345161726 | 2,620184 |
| O00487  | 26S proteasome non-ATPase regulatory subunit 14 OS=Homo sapiens OX=9606 GN=PSMD14 PE=1 SV=1                                    | -0,344981335 | 2,618496 |
| P25205  | DNA replication licensing factor MCM3 OS=Homo sapiens OX=9606 GN=MCM3 PE=1 SV=3                                                | -0,221904632 | 2,616888 |
| O96000  | NADH dehydrogenase [ubiquinone] 1 beta subcomplex subunit 10 OS=Homo sapiens OX=9606 GN=NDUF810 PE=1 SV=3                      | -0,415840109 | 2,604234 |
| O95292  | Vesicle-associated membrane protein-associated protein B/C OS=Homo sapiens OX=9606 GN=VAPB PE=1 SV=3                           | 0,343442232  | 2,604103 |
| O95980  | Reversion-inducing cysteine-rich protein with Kazal motifs OS=Homo sapiens OX=9606 GN=RECK PE=1 SV=1                           | 0,207925013  | 2,602442 |
| P32455  | Guanylate-binding protein 1 OS=Homo sapiens OX=9606 GN=GBP1 PE=1 SV=2                                                          | -0,31827244  | 2,595017 |
| Q12929  | Epidermal growth factor receptor kinase substrate 8 OS=Homo sapiens OX=9606 GN=EPS8 PE=1 SV=1                                  | 0,256041627  | 2,592183 |
| P11310  | Medium-chain specific acyl-CoA dehydrogenase, mitochondrial OS=Homo sapiens OX=9606 GN=ACADM PE=1 SV=1                         | -0,473056182 | 2,589265 |
| Q9Y2H0  | Disks large-associated protein 4 OS=Homo sapiens OX=9606 GN=DLGAP4 PE=1 SV=3                                                   | 0,569323829  | 2,587771 |
| Q9NRY5  | Protein FAM114A2 OS=Homo sapiens OX=9606 GN=FAM114A2 PE=1 SV=4                                                                 | 0,372221656  | 2,585924 |
| O15131  | Importin subunit alpha-6 OS=Homo sapiens OX=9606 GN=KPNAS6 PE=1 SV=2                                                           | 0,28116273   | 2,582351 |
| Q9NUQ9  | Protein FAM49B OS=Homo sapiens OX=9606 GN=FAM49B PE=1 SV=1                                                                     | -0,317011948 | 2,582118 |
| P07311  | Acylphosphatase-1 OS=Homo sapiens OX=9606 GN=ACYP1 PE=1 SV=2                                                                   | 0,567946128  | 2,581426 |
| P29317  | Ephrin type-A receptor 2 OS=Homo sapiens OX=9606 GN=EPHA2 PE=1 SV=2                                                            | 0,22644503   | 2,571035 |
| P04004  | Vitronectin OS=Homo sapiens OX=9606 GN=VTN PE=1 SV=1                                                                           | 1,63004117   | 2,567261 |
| Q15751  | Probable E3 ubiquitin-protein ligase HERC1 OS=Homo sapiens OX=9606 GN=HERC1 PE=1 SV=2                                          | -0,325352402 | 2,564748 |
| P62820  | Ras-related protein Rab-1A OS=Homo sapiens OX=9606 GN=RAB1A PE=1 SV=3                                                          | 0,243099724  | 2,55877  |
| P62995  | Transformer-2 protein homolog beta OS=Homo sapiens OX=9606 GN=TRA2B PE=1 SV=1                                                  | -0,467722231 | 2,557    |
| Q02952  | A-kinase anchor protein 12 OS=Homo sapiens OX=9606 GN=AKAP12 PE=1 SV=4                                                         | -0,131494634 | 2,552506 |
| Q9Y2H6  | Fibronectin type-III domain-containing protein 3A OS=Homo sapiens OX=9606 GN=FNDC3A PE=1 SV=4                                  | 0,337715374  | 2,550649 |
| Q53E90  | Fibronectin type III domain-containing protein 3B OS=Homo sapiens OX=9606 GN=FNDC3B PE=1 SV=2                                  | -0,278367803 | 2,549348 |
| O15269  | Serine palmitoyltransferase 1 OS=Homo sapiens OX=9606 GN=SPTLC1 PE=1 SV=1                                                      | -0,313360135 | 2,544817 |
| O43175  | D-3-phosphoglycerate dehydrogenase OS=Homo sapiens OX=9606 GN=PHGDH PE=1 SV=4                                                  | 0,224524949  | 2,54208  |
| O94760  | N(G),N(G)-dimethylarginine dimethylaminohydrolase 1 OS=Homo sapiens OX=9606 GN=DDAH1 PE=1 SV=3                                 | 0,36675157   | 2,540218 |
| R18065  | Insulin-like growth factor-binding protein 2 OS=Homo sapiens OX=9606 GN=IGFBP2 PE=1 SV=2                                       | -0,754298308 | 2,539324 |
| P20338  | Ras-related protein Rab-4A OS=Homo sapiens OX=9606 GN=RAB4A PE=1 SV=3                                                          | -0,751885292 | 2,532333 |
| Q86V48  | Leucine zipper protein 1 OS=Homo sapiens OX=9606 GN=LZIP1 PE=1 SV=2                                                            | 0,209773893  | 2,531284 |
| Q99623  | Prohibitin-2 OS=Homo sapiens OX=9606 GN=PHB2 PE=1 SV=2                                                                         | 0,231606027  | 2,526744 |
| Q14517  | Protocadherin Fat 1 OS=Homo sapiens OX=9606 GN=FAT1 PE=1 SV=2                                                                  | 0,405134085  | 2,526328 |
| P25325  | 3-mercaptopyruvate sulfurtransferase OS=Homo sapiens OX=9606 GN=MPST PE=1 SV=3                                                 | 0,74870181   | 2,523091 |
| P02786  | Transferrin receptor protein 1 OS=Homo sapiens OX=9606 GN=TFRC PE=1 SV=2                                                       | 0,183186666  | 2,520855 |
| Q16537  | Serine/threonine-protein phosphatase 2A 56 kDa regulatory subunit epsilon isoform OS=Homo sapiens OX=9606 GN=PPP2R5E PE=1 SV=1 | 0,333925638  | 2,515367 |
| Q9HCE0  | Ectopic P granules protein 5 homolog OS=Homo sapiens OX=9606 GN=EPG5 PE=1 SV=2                                                 | 0,250159706  | 2,514537 |
| Q9Y2V2  | Calcium-regulated heat-stable protein 1 OS=Homo sapiens OX=9606 GN=CARHSP1 PE=1 SV=2                                           | -0,553330294 | 2,51385  |
| Q15758  | Neutral amino acid transporter B(0) OS=Homo sapiens OX=9606 GN=SLC1A5 PE=1 SV=2                                                | 0,27509313   | 2,510811 |
| Q9UP75  | Exocyst complex component 7 OS=Homo sapiens OX=9606 GN=EXOC7 PE=1 SV=3                                                         | -0,309959281 | 2,51017  |
| Q9UP83  | Conserved oligomeric Golgi complex subunit 5 OS=Homo sapiens OX=9606 GN=COG5 PE=1 SV=3                                         | 0,459378991  | 2,506463 |
| Q96RQ3  | Methylcrotonyl-CoA carboxylase subunit alpha, mitochondrial OS=Homo sapiens OX=9606 GN=MCCC1 PE=1 SV=3                         | -0,740509408 | 2,499209 |

|        |                                                                                                               |              |          |
|--------|---------------------------------------------------------------------------------------------------------------|--------------|----------|
| P28838 | Cytosol aminopeptidase OS=Homo sapiens OX=9606 GN=LAP3 PE=1 SV=3                                              | -0,207664599 | 2,49727  |
| P30740 | Leukocyte elastase inhibitor OS=Homo sapiens OX=9606 GN=SERPINB1 PE=1 SV=1                                    | 0,260404243  | 2,496288 |
| Q9NX08 | COMM domain-containing protein 8 OS=Homo sapiens OX=9606 GN=COMM8 PE=1 SV=1                                   | -0,457161276 | 2,493017 |
| P62701 | 40S ribosomal protein S4, X isoform OS=Homo sapiens OX=9606 GN=RPS4X PE=1 SV=2                                | 0,229315477  | 2,492967 |
| P27695 | DNA-(apurinic or apyrimidinic site) lyase OS=Homo sapiens OX=9606 GN=APEX1 PE=1 SV=2                          | 0,26009281   | 2,492413 |
| P07108 | Acyl-CoA-binding protein OS=Homo sapiens OX=9606 GN=DBI PE=1 SV=2                                             | -0,456967891 | 2,491844 |
| Q9UKV3 | Apoptotic chromatin condensation inducer in the nucleus OS=Homo sapiens OX=9606 GN=ACIN1 PE=1 SV=2            | 0,289230559  | 2,491597 |
| P61011 | Signal recognition particle 54 kDa protein OS=Homo sapiens OX=9606 GN=SRP54 PE=1 SV=1                         | 0,238209866  | 2,491249 |
| P67936 | Tropomyosin alpha-4 chain OS=Homo sapiens OX=9606 GN=TPM4 PE=1 SV=3                                           | -0,18155625  | 2,490488 |
| Q9BY13 | Hyccin OS=Homo sapiens OX=9606 GN=FAM126A PE=1 SV=2                                                           | -0,735872019 | 2,485629 |
| P52272 | Heterogeneous nuclear ribonucleoprotein M OS=Homo sapiens OX=9606 GN=HNRNPM PE=1 SV=3                         | -0,127492983 | 2,485242 |
| Q9Y2X3 | Nucleolar protein 58 OS=Homo sapiens OX=9606 GN=NOP58 PE=1 SV=1                                               | 0,247758742  | 2,48303  |
| Q03468 | DNA excision repair protein ERCC-6 OS=Homo sapiens OX=9606 GN=ERCC6 PE=1 SV=1                                 | -0,734390414 | 2,48128  |
| Q16630 | Cleavage and polyadenylation specificity factor subunit 6 OS=Homo sapiens OX=9606 GN=CPSP6 PE=1 SV=2          | 0,359112879  | 2,476529 |
| P61758 | Prefoldin subunit 3 OS=Homo sapiens OX=9606 GN=VBP1 PE=1 SV=4                                                 | 0,287316051  | 2,470617 |
| Q52L10 | Protein FAM98B OS=Homo sapiens OX=9606 GN=FAM98B PE=1 SV=2                                                    | 0,397149982  | 2,468273 |
| Q86T17 | Actin-histidine N-methyltransferase OS=Homo sapiens OX=9606 GN=SETD3 PE=1 SV=1                                | -0,396862789 | 2,466186 |
| Q9ULK4 | Mediator of RNA polymerase II transcription subunit 23 OS=Homo sapiens OX=9606 GN=MED23 PE=1 SV=2             | -0,366151638 | 2,461519 |
| Q15417 | Calponin-3 OS=Homo sapiens OX=9606 GN=CNN3 PE=1 SV=1                                                          | 0,193917289  | 2,45972  |
| Q8N6M3 | Fat storage-inducing transmembrane protein 2 OS=Homo sapiens OX=9606 GN=FITM2 PE=1 SV=1                       | -1,058785647 | 2,458948 |
| Q14642 | Inositol polyphosphate-5-phosphatase A OS=Homo sapiens OX=9606 GN=INPP5A PE=1 SV=1                            | 0,795879349  | 2,454944 |
| Q8Y16  | Exocyst complex component 8 OS=Homo sapiens OX=9606 GN=EXOC8 PE=1 SV=2                                        | -0,725415537 | 2,45484  |
| Q9UBR2 | Cathepsin Z OS=Homo sapiens OX=9606 GN=CTSZ PE=1 SV=1                                                         | -0,327192606 | 2,452869 |
| P51451 | Tyrosine-protein kinase Blk OS=Homo sapiens OX=9606 GN=BLK PE=1 SV=3                                          | 2,543201386  | 2,446316 |
| P26196 | Probable ATP-dependent RNA helicase DDX6 OS=Homo sapiens OX=9606 GN=DDX6 PE=1 SV=2                            | 0,210876691  | 2,444795 |
| Q96GQ5 | RUS1 family protein C16orf58 OS=Homo sapiens OX=9606 GN=C16orf58 PE=1 SV=2                                    | -0,538489266 | 2,444753 |
| P0C0L4 | Complement C4-A OS=Homo sapiens OX=9606 GN=C4A PE=1 SV=2                                                      | -0,721452364 | 2,44311  |
| Q9C0B1 | Alpha-ketoglutarate-dependent dioxygenase FTO OS=Homo sapiens OX=9606 GN=FTO PE=1 SV=3                        | 0,32590617   | 2,440956 |
| Q92743 | Serine protease HTRA1 OS=Homo sapiens OX=9606 GN=HTRA1 PE=1 SV=1                                              | -0,325889245 | 2,4408   |
| Q9Y2D4 | Exocyst complex component 6B OS=Homo sapiens OX=9606 GN=EXOC6B PE=1 SV=3                                      | 0,393250766  | 2,439939 |
| P46779 | 60S ribosomal protein L28 OS=Homo sapiens OX=9606 GN=RPL28 PE=1 SV=3                                          | 0,325607456  | 2,438192 |
| Q9BY32 | Inosine triphosphate pyrophosphatase OS=Homo sapiens OX=9606 GN=ITPA PE=1 SV=2                                | 0,392680022  | 2,435793 |
| P51946 | Cyclin-H OS=Homo sapiens OX=9606 GN=CCNH PE=1 SV=1                                                            | -0,094595739 | 2,430716 |
| Q9HIR3 | Myosin light chain kinase 2, skeletal/cardiac muscle OS=Homo sapiens OX=9606 GN=MYLK2 PE=1 SV=3               | 1,055126647  | 2,42016  |
| Q13671 | Ras and Rab interactor 1 OS=Homo sapiens OX=9606 GN=RIN1 PE=1 SV=4                                            | -0,533072216 | 2,419415 |
| Q96QK1 | Vacuolar protein sorting-associated protein 35 OS=Homo sapiens OX=9606 GN=VPS35 PE=1 SV=2                     | -0,160109692 | 2,4194   |
| Q86T89 | Protein PAT1 homolog 1 OS=Homo sapiens OX=9606 GN=PATL1 PE=1 SV=2                                             | 0,897915491  | 2,41752  |
| Q9P270 | SLAIN1 motif-containing protein 2 OS=Homo sapiens OX=9606 GN=SLAIN2 PE=1 SV=2                                 | 0,351537042  | 2,41357  |
| P35659 | Protein DEK OS=Homo sapiens OX=9606 GN=DEK PE=1 SV=1                                                          | -0,3228691   | 2,412869 |
| P30041 | Peroxiredoxin-6 OS=Homo sapiens OX=9606 GN=PRDX6 PE=1 SV=3                                                    | -0,19090341  | 2,408519 |
| Q9Y4E8 | Ubiquitin carboxyl-terminal hydrolase 15 OS=Homo sapiens OX=9606 GN=USP15 PE=1 SV=3                           | 0,201995997  | 2,406609 |
| A03708 | Maleylacetoacetate isomerase OS=Homo sapiens OX=9606 GN=GSTZ1 PE=1 SV=3                                       | -0,530001581 | 2,405025 |
| P53779 | Mitogen-activated protein kinase 10 OS=Homo sapiens OX=9606 GN=MAPK10 PE=1 SV=2                               | -0,505583288 | 2,40309  |
| P30038 | Delta-1-pyrroline-5-carboxylate dehydrogenase, mitochondrial OS=Homo sapiens OX=9606 GN=ALDH4A1 PE=1 SV=3     | 0,349753194  | 2,398732 |
| Q8NHP8 | Putative phospholipase B-like 2 OS=Homo sapiens OX=9606 GN=PLBD2 PE=1 SV=2                                    | -0,44155724  | 2,398271 |
| Q9BV20 | Methylthioribose-1-phosphate isomerase OS=Homo sapiens OX=9606 GN=MR11 PE=1 SV=1                              | 0,527824314  | 2,39481  |
| Q16181 | Septin-7 OS=Homo sapiens OX=9606 GN=SEPTIN7 PE=1 SV=2                                                         | 0,200952886  | 2,390046 |
| Q92520 | Protein FAM3C OS=Homo sapiens OX=9606 GN=FAM3C PE=1 SV=1                                                      | 0,279808807  | 2,388733 |
| Q8NCA5 | Protein FAM98A OS=Homo sapiens OX=9606 GN=FAM98A PE=1 SV=2                                                    | 0,385718063  | 2,385244 |
| Q96PD2 | Discoidin, CUB and LCC1 domain-containing protein 2 OS=Homo sapiens OX=9606 GN=DCBLD2 PE=1 SV=1               | 0,525019028  | 2,381634 |
| Q3MHD2 | Protein LSM12 homolog OS=Homo sapiens OX=9606 GN=LSM12 PE=1 SV=2                                              | -0,523371925 | 2,373891 |
| Q9NXG2 | THUMP domain-containing protein 1 OS=Homo sapiens OX=9606 GN=THUMPD1 PE=1 SV=2                                | 0,346597983  | 2,37257  |
| P40222 | Alpha-taxilin OS=Homo sapiens OX=9606 GN=TXLNA PE=1 SV=3                                                      | -0,220775845 | 2,371146 |
| Q04323 | UBX domain-containing protein 1 OS=Homo sapiens OX=9606 GN=UBXN1 PE=1 SV=2                                    | -0,262958289 | 2,369265 |
| Q60282 | Kinesin heavy chain isoform 5C OS=Homo sapiens OX=9606 GN=KIF5C PE=1 SV=1                                     | 2,009817435  | 2,368789 |
| Q6Y211 | Kynurenine-oxoglutarate transaminase 3 OS=Homo sapiens OX=9606 GN=KYAT3 PE=1 SV=1                             | -0,383383333 | 2,368304 |
| Q8NC51 | Plasminogen activator inhibitor 1 RNA-binding protein OS=Homo sapiens OX=9606 GN=SERBP1 PE=1 SV=2             | 0,220352546  | 2,365155 |
| P29536 | Leiomodin-1 OS=Homo sapiens OX=9606 GN=LMOD1 PE=1 SV=3                                                        | 0,317474965  | 2,363115 |
| Q9NRW3 | DNA dc->dU-editing enzyme APOBEC-3C OS=Homo sapiens OX=9606 GN=APOBEC3C PE=1 SV=2                             | -0,520934317 | 2,362421 |
| P48739 | Phosphatidylinositol transfer protein beta isoform OS=Homo sapiens OX=9606 GN=PITPNB PE=1 SV=2                | 0,238339556  | 2,3605   |
| P17302 | Gap junction alpha-1 protein OS=Homo sapiens OX=9606 GN=GJA1 PE=1 SV=2                                        | -0,344895167 | 2,358466 |
| Q60551 | Glycylpeptide N-tetradecanoyltransferase 2 OS=Homo sapiens OX=9606 GN=NMT2 PE=1 SV=1                          | -0,381981717 | 2,358137 |
| Q94826 | Mitochondrial import receptor subunit TOM70 OS=Homo sapiens OX=9606 GN=TOMM70 PE=1 SV=1                       | 0,212122278  | 2,357518 |
| P21953 | 2-oxoisovalerate dehydrogenase subunit beta, mitochondrial OS=Homo sapiens OX=9606 GN=BCKDHB PE=1 SV=2        | 1,450294781  | 2,35718  |
| Q6PJW8 | Consorin OS=Homo sapiens OX=9606 GN=CNST PE=1 SV=3                                                            | -0,333191956 | 2,356899 |
| P61006 | Ras-related protein Rab-8A OS=Homo sapiens OX=9606 GN=RAB8A PE=1 SV=1                                         | -0,344258332 | 2,353193 |
| Q6UU9V | CREB-regulated transcription coactivator 1 OS=Homo sapiens OX=9606 GN=CRCT1 PE=1 SV=2                         | 0,09312567   | 2,351374 |
| P12268 | Inosine-5'-monophosphate dehydrogenase 2 OS=Homo sapiens OX=9606 GN=HMPDH2 PE=1 SV=2                          | 0,173936003  | 2,350334 |
| P18887 | DNA repair protein XRCC1 OS=Homo sapiens OX=9606 GN=XRCC1 PE=1 SV=2                                           | 1,387841989  | 2,347695 |
| O75326 | Semaphorin-7A OS=Homo sapiens OX=9606 GN=SEMA7A PE=1 SV=1                                                     | 0,182351772  | 2,346019 |
| P62277 | 40S ribosomal protein S13 OS=Homo sapiens OX=9606 GN=RPS13 PE=1 SV=2                                          | -0,29367628  | 2,345579 |
| P54105 | Methylosome subunit pICln OS=Homo sapiens OX=9606 GN=CLNS1A PE=1 SV=1                                         | -2,130958797 | 2,345037 |
| Q8NFQ8 | Torsin-1A-interacting protein 2 OS=Homo sapiens OX=9606 GN=TOR1AIP2 PE=1 SV=1                                 | 0,248028845  | 2,34356  |
| Q96C23 | Aldose 1-epimerase OS=Homo sapiens OX=9606 GN=GALM PE=1 SV=1                                                  | -0,97011296  | 2,340589 |
| Q9UBC2 | Epidermal growth factor receptor substrate 15-like 1 OS=Homo sapiens OX=9606 GN=EPS15L1 PE=1 SV=1             | 0,226813427  | 2,335943 |
| P11216 | Glycogen phosphorylase, brain form OS=Homo sapiens OX=9606 GN=PYGB PE=1 SV=5                                  | -0,131178349 | 2,334324 |
| Q9H0B6 | Kinesin light chain 2 OS=Homo sapiens OX=9606 GN=KLC2 PE=1 SV=1                                               | -0,274750649 | 2,333917 |
| Q5JWF2 | Guanine nucleotide-binding protein G(s) subunit alpha isoforms XLas OS=Homo sapiens OX=9606 GN=GNAS PE=1 SV=2 | -0,341888704 | 2,333588 |
| Q06481 | Amyloid-like protein 2 OS=Homo sapiens OX=9606 GN=APLP2 PE=1 SV=2                                             | 0,684585922  | 2,332395 |
| Q15020 | Squamous cell carcinoma antigen recognized by T-cells 3 OS=Homo sapiens OX=9606 GN=SART3 PE=1 SV=1            | -0,292277977 | 2,33155  |
| Q81XB1 | Dnaj homolog subfamily C member 10 OS=Homo sapiens OX=9606 GN=DNAJC10 PE=1 SV=2                               | 0,236014042  | 2,330518 |
| O14972 | Vacuolar protein sorting-associated protein 26C OS=Homo sapiens OX=9606 GN=VPS26C PE=1 SV=1                   | -0,682343262 | 2,325566 |
| Q6PII5 | Hydroxacylglutathione hydrolase-like protein OS=Homo sapiens OX=9606 GN=HAGHL PE=2 SV=1                       | 1,565704694  | 2,324421 |
| Q9NWX5 | Ankyrin repeat and SOCS box protein 6 OS=Homo sapiens OX=9606 GN=ASB6 PE=1 SV=1                               | 0,680923751  | 2,321238 |
| O14818 | Proteasome subunit alpha type-7 OS=Homo sapiens OX=9606 GN=PSMA7 PE=1 SV=1                                    | -0,273501925 | 2,32043  |
| Q9UH16 | Probable ATP-dependent RNA helicase DDX20 OS=Homo sapiens OX=9606 GN=DDX20 PE=1 SV=2                          | 0,326795572  | 2,319059 |
| Q9NZJ7 | Mitochondrial carrier homolog 1 OS=Homo sapiens OX=9606 GN=MTCH1 PE=1 SV=1                                    | -0,376265083 | 2,316699 |
| Q9NVZ3 | Adaptin ear-binding coat-associated protein 2 OS=Homo sapiens OX=9606 GN=NECAP2 PE=1 SV=1                     | 0,428133385  | 2,316605 |
| P42226 | Signal transducer and activator of transcription 6 OS=Homo sapiens OX=9606 GN=STAT6 PE=1 SV=1                 | 0,312411431  | 2,31657  |
| Q9H2W6 | 39S ribosomal protein L46, mitochondrial OS=Homo sapiens OX=9606 GN=MRPL46 PE=1 SV=1                          | -1,017688325 | 2,31514  |
| Q86XP3 | ATP-dependent RNA helicase DDX42 OS=Homo sapiens OX=9606 GN=DDX42 PE=1 SV=1                                   | 0,290425785  | 2,312993 |
| Q9Y6E2 | Basic leucine zipper and W2 domain-containing protein 2 OS=Homo sapiens OX=9606 GN=BZW2 PE=1 SV=1             | 0,21607018   | 2,304815 |
| Q9UBEO | SUMO-activating enzyme subunit 1 OS=Homo sapiens OX=9606 GN=SAE1 PE=1 SV=1                                    | 0,257314034  | 2,30413  |
| Q9NUY8 | TBC1 domain family member 23 OS=Homo sapiens OX=9606 GN=TBC1D23 PE=1 SV=3                                     | -0,37398416  | 2,300178 |
| Q9BTU6 | Phosphatidylinositol 4-kinase type 2-alpha OS=Homo sapiens OX=9606 GN=PI4K2A PE=1 SV=1                        | -0,673992331 | 2,300043 |
| P11717 | Cation-independent mannose-6-phosphate receptor OS=Homo sapiens OX=9606 GN=IGF2R PE=1 SV=3                    | -0,143703335 | 2,297333 |
| P49750 | YLP motif-containing protein 1 OS=Homo sapiens OX=9606 GN=YLPM1 PE=1 SV=4                                     | 0,373463704  | 2,296409 |
| P06756 | Integrin alpha-V OS=Homo sapiens OX=9606 GN=ITGAV PE=1 SV=2                                                   | -0,126175451 | 2,2932   |

|         |                                                                                                                              |              |          |
|---------|------------------------------------------------------------------------------------------------------------------------------|--------------|----------|
| Q6P2Q9  | Pre-mRNA-processing-splicing factor 8 OS=Homo sapiens OX=9606 GN=PRPF8 PE=1 SV=2                                             | -0,124548349 | 2,291552 |
| P61916  | NPC intracellular cholesterol transporter 2 OS=Homo sapiens OX=9606 GN=NPC2 PE=1 SV=1                                        | -0,336635009 | 2,290195 |
| Q99519  | Sialidase-1 OS=Homo sapiens OX=9606 GN=NEU1 PE=1 SV=1                                                                        | -0,555873208 | 2,290171 |
| P41240  | Tyrosine-protein kinase CSK OS=Homo sapiens OX=9606 GN=CSK PE=1 SV=1                                                         | 0,243503695  | 2,288363 |
| Q12874  | Splicing factor 3A subunit 3 OS=Homo sapiens OX=9606 GN=SF3A3 PE=1 SV=1                                                      | 0,309281584  | 2,287878 |
| Q8TCU2  | Dolichyl-diphosphooligosaccharide-protein glycosyltransferase subunit STT3B OS=Homo sapiens OX=9606 GN=STT3B PE=1 SV=1       | 0,243461716  | 2,287852 |
| Q14258  | E3 ubiquitin/ISG15 ligase TRIM25 OS=Homo sapiens OX=9606 GN=TRIM25 PE=1 SV=2                                                 | 0,207014644  | 2,282788 |
| Q9NYZ1  | Golgi apparatus membrane protein TVP23 homolog B OS=Homo sapiens OX=9606 GN=TVP23B PE=1 SV=2                                 | 1,767864704  | 2,282104 |
| Q9V605  | MORF4 family-associated protein 1 OS=Homo sapiens OX=9606 GN=MRFAP1 PE=1 SV=1                                                | 1,511596145  | 2,281948 |
| Q9NQA5  | Transient receptor potential cation channel subfamily V member 5 OS=Homo sapiens OX=9606 GN=TRPV5 PE=1 SV=2                  | -1,405623558 | 2,280499 |
| P35442  | Thrombospondin-2 OS=Homo sapiens OX=9606 GN=THBS2 PE=1 SV=2                                                                  | 0,495469306  | 2,279823 |
| P63267  | Actin, gamma-enteric smooth muscle OS=Homo sapiens OX=9606 GN=ACTG2 PE=1 SV=1                                                | 0,140616406  | 2,279737 |
| P19474  | E3 ubiquitin-protein ligase TRIM21 OS=Homo sapiens OX=9606 GN=TRIM21 PE=1 SV=1                                               | 1,318694133  | 2,278776 |
| Q6DD88  | Atlantin-3 OS=Homo sapiens OX=9606 GN=ATL3 PE=1 SV=1                                                                         | 0,183118467  | 2,277968 |
| O75347  | Tubulin-specific chaperone A OS=Homo sapiens OX=9606 GN=TBCA PE=1 SV=3                                                       | -0,254919643 | 2,276637 |
| Q9NP58  | ATP-binding cassette sub-family B member 6, mitochondrial OS=Homo sapiens OX=9606 GN=ABC8B PE=1 SV=1                         | -0,960856163 | 2,275165 |
| P23396  | 40S ribosomal protein S3 OS=Homo sapiens OX=9606 GN=RPS3 PE=1 SV=2                                                           | 0,169731648  | 2,274246 |
| P29692  | Elongation factor 1-delta OS=Homo sapiens OX=9606 GN=EF1D PE=1 SV=5                                                          | 0,169641673  | 2,272627 |
| Q07157  | Tight junction protein ZO-1 OS=Homo sapiens OX=9606 GN=TJP1 PE=1 SV=3                                                        | -0,173678301 | 2,272151 |
| Q6XQK6  | Nicotinate phosphoribosyltransferase OS=Homo sapiens OX=9606 GN=NAPRT PE=1 SV=2                                              | 0,702741315  | 2,270607 |
| Q9Y385  | Ubiquitin-conjugating enzyme E2 J1 OS=Homo sapiens OX=9606 GN=UBE2J1 PE=1 SV=2                                               | 0,304806587  | 2,267937 |
| Q8NDV7  | Trinucleotide repeat-containing gene 6A protein OS=Homo sapiens OX=9606 GN=TNRC6A PE=1 SV=2                                  | -0,36932903  | 2,264527 |
| Q723E5  | LisH domain-containing protein ARMC9 OS=Homo sapiens OX=9606 GN=ARMC9 PE=1 SV=3                                              | -1,867070813 | 2,264202 |
| Q95433  | Activator of 90 kDa heat shock protein ATPase homolog 1 OS=Homo sapiens OX=9606 GN=AHS1 PE=1 SV=1                            | 0,213092598  | 2,263142 |
| Q9GZT4  | Serine racemase OS=Homo sapiens OX=9606 GN=SRR PE=1 SV=1                                                                     | -0,419078697 | 2,261446 |
| O00391  | Sulfhydryl oxidase 1 OS=Homo sapiens OX=9606 GN=SOX1 PE=1 SV=3                                                               | -0,661394235 | 2,261254 |
| Q5VWV36 | Focadhesin OS=Homo sapiens OX=9606 GN=FOCAD PE=1 SV=1                                                                        | 0,418467966  | 2,25774  |
| Q6IAN0  | Dehydrogenase/reductase SDR family member 7B OS=Homo sapiens OX=9606 GN=DHRS7B PE=1 SV=2                                     | -0,498474426 | 2,256192 |
| P49591  | Serine-tRNA ligase, cytoplasmic OS=Homo sapiens OX=9606 GN=SARS PE=1 SV=3                                                    | -0,181701153 | 2,254468 |
| P04899  | Guanine nucleotide-binding protein (G(i)) subunit alpha-2 OS=Homo sapiens OX=9606 GN=GNAI2 PE=1 SV=3                         | -0,186738944 | 2,253723 |
| Q96Q88  | Transcriptional activator protein Pur-beta OS=Homo sapiens OX=9606 GN=PURB PE=1 SV=3                                         | 0,658936876  | 2,253648 |
| O95249  | Golgi SNAP receptor complex member 1 OS=Homo sapiens OX=9606 GN=GOSR1 PE=1 SV=1                                              | 0,658746912  | 2,25306  |
| P14550  | Aldo-keto reductase family 1 member A1 OS=Homo sapiens OX=9606 GN=AKR1A1 PE=1 SV=3                                           | 0,229883425  | 2,252003 |
| Q14195  | Hydroxyprymidinase-related protein 3 OS=Homo sapiens OX=9606 GN=DPYSL3 PE=1 SV=1                                             | 0,168387299  | 2,250101 |
| Q9Y4F1  | FERM, ARHGEF and pleckstrin domain-containing protein 1 OS=Homo sapiens OX=9606 GN=FAFP1 PE=1 SV=1                           | -0,252594651 | 2,250023 |
| Q08AM6  | Protein VAC14 homolog OS=Homo sapiens OX=9606 GN=VAC14 PE=1 SV=1                                                             | -0,366798428 | 2,248182 |
| Q8IUR0  | Trafficking protein particle complex subunit 5 OS=Homo sapiens OX=9606 GN=TRAPPC5 PE=1 SV=1                                  | 0,416799791  | 2,247576 |
| Q6379   | Large proline-rich protein BAG6 OS=Homo sapiens OX=9606 GN=BAG6 PE=1 SV=2                                                    | 0,25223811   | 2,245948 |
| Q9BS26  | Endoplasmic reticulum resident protein 44 OS=Homo sapiens OX=9606 GN=ERP44 PE=1 SV=1                                         | 0,204304302  | 2,243441 |
| O95155  | Ubiquitin conjugation factor E4 B OS=Homo sapiens OX=9606 GN=UBE4B PE=1 SV=1                                                 | 0,283356919  | 2,242456 |
| Q9P121  | Neurotrimin OS=Homo sapiens OX=9606 GN=NTM PE=1 SV=1                                                                         | -0,495395381 | 2,241555 |
| O75822  | Eukaryotic translation initiation factor 3 subunit J OS=Homo sapiens OX=9606 GN=EIF3J PE=1 SV=2                              | 0,283048253  | 2,239386 |
| P46783  | 40S ribosomal protein S10 OS=Homo sapiens OX=9606 GN=RPS10 PE=1 SV=1                                                         | 0,28304683   | 2,239372 |
| O75947  | ATP synthase subunit d, mitochondrial OS=Homo sapiens OX=9606 GN=ATP5PD PE=1 SV=3                                            | -0,283012916 | 2,239035 |
| P07996  | Thrombospondin-1 OS=Homo sapiens OX=9606 GN=THBS1 PE=1 SV=2                                                                  | 0,11294517   | 2,234671 |
| Q9NR30  | Nucleolar RNA helicase 2 OS=Homo sapiens OX=9606 GN=DDX21 PE=1 SV=5                                                          | 0,210990016  | 2,233855 |
| Q6P4E1  | Protein CASCA4 OS=Homo sapiens OX=9606 GN=CASCA4 PE=1 SV=2                                                                   | 0,493647652  | 2,232329 |
| P35080  | Profilin-2 OS=Homo sapiens OX=9606 GN=PFN2 PE=1 SV=3                                                                         | -0,364120811 | 2,228828 |
| Q9Y617  | Phosphoserine aminotransferase OS=Homo sapiens OX=9606 GN=PSAT1 PE=1 SV=2                                                    | -0,196669926 | 2,228695 |
| P62805  | Histone H4 OS=Homo sapiens OX=9606 GN=HIST1H4A PE=1 SV=2                                                                     | 0,302691569  | 2,227678 |
| Q9GZ29  | Ubiquitin-like modifier-activating enzyme 5 OS=Homo sapiens OX=9606 GN=UBA5 PE=1 SV=1                                        | -0,492370477 | 2,227158 |
| P49815  | Tuberin OS=Homo sapiens OX=9606 GN=TSC2 PE=1 SV=2                                                                            | 0,491952088  | 2,225166 |
| P50238  | Cysteine-rich protein 1 OS=Homo sapiens OX=9606 GN=CRIP1 PE=1 SV=3                                                           | 0,49191766   | 2,225002 |
| Q9H0H5  | Rac GTPase-activating protein 1 OS=Homo sapiens OX=9606 GN=RACGAP1 PE=1 SV=1                                                 | -0,491793831 | 2,224412 |
| P26022  | Pentraxin-related protein PTX3 OS=Homo sapiens OX=9606 GN=PTX3 PE=1 SV=3                                                     | -0,328286033 | 2,221458 |
| P49662  | Caspase-4 OS=Homo sapiens OX=9606 GN=CASP4 PE=1 SV=1                                                                         | 0,844322427  | 2,220316 |
| P15289  | Arylsulfatase A OS=Homo sapiens OX=9606 GN=ARSA PE=1 SV=3                                                                    | -0,327876101 | 2,218091 |
| Q9UEY8  | Gamma-ubiducin OS=Homo sapiens OX=9606 GN=ADD3 PE=1 SV=1                                                                     | 0,195934649  | 2,217687 |
| P46782  | 40S ribosomal protein S5 OS=Homo sapiens OX=9606 GN=RPS5 PE=1 SV=4                                                           | 0,23750802   | 2,215781 |
| O43865  | S-adenosylhomocysteine hydrolase-like protein 1 OS=Homo sapiens OX=9606 GN=AHCVL1 PE=1 SV=2                                  | 0,20941226   | 2,211956 |
| Q9NZU5  | LIM and cysteine-rich domains protein 1 OS=Homo sapiens OX=9606 GN=LMCD1 PE=1 SV=1                                           | -0,174370364 | 2,209648 |
| Q13084  | 39S ribosomal protein L28, mitochondrial OS=Homo sapiens OX=9606 GN=MRPL28 PE=1 SV=4                                         | 1,345289036  | 2,208454 |
| Q07866  | Kinesin light chain 1 OS=Homo sapiens OX=9606 GN=KLC1 PE=1 SV=2                                                              | -0,183812972 | 2,206892 |
| Q96EK5  | KIF1-binding protein OS=Homo sapiens OX=9606 GN=KIF1BP PE=1 SV=1                                                             | 0,300379904  | 2,206629 |
| Q9B0G0  | Myb-binding protein 1A OS=Homo sapiens OX=9606 GN=MYBBP1A PE=1 SV=2                                                          | 0,201733082  | 2,206315 |
| P18669  | Phosphoglycerate mutase 1 OS=Homo sapiens OX=9606 GN=PGAM1 PE=1 SV=2                                                         | 0,194932005  | 2,202705 |
| Q10472  | Polypeptide N-acetylgalactosaminyltransferase 1 OS=Homo sapiens OX=9606 GN=GALNT1 PE=1 SV=1                                  | 0,194763458  | 2,20019  |
| Q14739  | Delta(14)-sterol reductase OS=Homo sapiens OX=9606 GN=LBR PE=1 SV=2                                                          | -0,641181759 | 2,198306 |
| O60568  | Multifunctional procollagen lysine hydroxylase and glycosyltransferase LH3 OS=Homo sapiens OX=9606 GN=PLOD3 PE=1 SV=1        | 1,154973713  | 2,195942 |
| Q5T6V5  | Queuosine salvage protein OS=Homo sapiens OX=9606 GN=C9orf64 PE=1 SV=1                                                       | 0,484637703  | 2,190283 |
| Q14257  | Reticulocalbin-2 OS=Homo sapiens OX=9606 GN=RCN2 PE=1 SV=1                                                                   | -0,235271948 | 2,188876 |
| P62841  | 40S ribosomal protein S15 OS=Homo sapiens OX=9606 GN=RPS15 PE=1 SV=2                                                         | 0,406908641  | 2,187295 |
| Q8IY88  | ATP-dependent RNA helicase SUPV3L1, mitochondrial OS=Homo sapiens OX=9606 GN=SUPV3L1 PE=1 SV=1                               | 0,520176244  | 2,185104 |
| Q9Y281  | Cofilin-2 OS=Homo sapiens OX=9606 GN=CFL2 PE=1 SV=1                                                                          | -0,277375629 | 2,183135 |
| P22392  | Nucleoside diphosphate kinase B OS=Homo sapiens OX=9606 GN=NME2 PE=1 SV=1                                                    | 0,323606756  | 2,18306  |
| Q96D15  | Reticulocalbin-3 OS=Homo sapiens OX=9606 GN=RCN3 PE=1 SV=1                                                                   | 0,224383259  | 2,182221 |
| Q969Q5  | Ras-related protein Rab-24 OS=Homo sapiens OX=9606 GN=RAB24 PE=1 SV=1                                                        | -0,489944519 | 2,181624 |
| P29218  | Inositol monophosphatase 1 OS=Homo sapiens OX=9606 GN=IMPA1 PE=1 SV=1                                                        | -0,357002664 | 2,177444 |
| P21291  | Cysteine and glycine-rich protein 1 OS=Homo sapiens OX=9606 GN=CSR1 PE=1 SV=3                                                | -0,214766576 | 2,175026 |
| A6NHR9  | Structural maintenance of chromosomes flexible hinge domain-containing protein 1 OS=Homo sapiens OX=9606 GN=SMCHD1 PE=1 SV=1 | -0,883648364 | 2,174607 |
| Q72222  | Elongation factor-like GTPase 1 OS=Homo sapiens OX=9606 GN=EFL1 PE=1 SV=2                                                    | 0,259789875  | 2,173547 |
| P18846  | Cyclic AMP-dependent transcription factor ATF-1 OS=Homo sapiens OX=9606 GN=ATF1 PE=1 SV=2                                    | 0,254067546  | 2,173207 |
| O94776  | Metastasis-associated protein MTA2 OS=Homo sapiens OX=9606 GN=MTA2 PE=1 SV=1                                                 | 0,29662644   | 2,172529 |
| P49368  | T-complex protein 1 subunit gamma OS=Homo sapiens OX=9606 GN=CCT3 PE=1 SV=4                                                  | 0,164032781  | 2,17252  |
| Q14161  | ARF GTPase-activating protein GIT2 OS=Homo sapiens OX=9606 GN=GIT2 PE=1 SV=2                                                 | -0,404465832 | 2,172404 |
| Q9Y4K1  | Beta/gamma crystallin domain-containing protein 1 OS=Homo sapiens OX=9606 GN=CRYBG1 PE=1 SV=3                                | 0,348867249  | 2,170713 |
| P43034  | Platelet-activating factor acetylhydrolase 1B subunit alpha OS=Homo sapiens OX=9606 GN=PFAH1B1 PE=1 SV=2                     | -0,186497913 | 2,164433 |
| Q7KZ17  | Serine/threonine-protein kinase MARK2 OS=Homo sapiens OX=9606 GN=MARK2 PE=1 SV=2                                             | 0,585534126  | 2,163511 |
| P60953  | Cell division control protein 42 homolog OS=Homo sapiens OX=9606 GN=CDC42 PE=1 SV=2                                          | -0,258797227 | 2,163005 |
| Q8WUD4  | Coiled-coil domain-containing protein 12 OS=Homo sapiens OX=9606 GN=CCDC12 PE=1 SV=1                                         | 0,498938813  | 2,158206 |
| P24593  | Insulin-like growth factor-binding protein 5 OS=Homo sapiens OX=9606 GN=IGFBP5 PE=1 SV=1                                     | -0,991809836 | 2,156331 |
| P31942  | Heterogeneous nuclear ribonucleoprotein H3 OS=Homo sapiens OX=9606 GN=HNRNPH3 PE=1 SV=2                                      | 0,353840528  | 2,154648 |
| P09960  | Leukotriene A-4 hydrolase OS=Homo sapiens OX=9606 GN=LTA4H PE=1 SV=2                                                         | 0,162722016  | 2,149356 |
| Q8N2K0  | Lysophosphatidylserine lipase ABHD12 OS=Homo sapiens OX=9606 GN=ABHD12 PE=1 SV=2                                             | -0,319461547 | 2,149125 |
| O75608  | Acyl-protein thioesterase 1 OS=Homo sapiens OX=9606 GN=LYPLA1 PE=1 SV=1                                                      | -0,400522515 | 2,148366 |
| P61204  | ADP-ribosylation factor 3 OS=Homo sapiens OX=9606 GN=ARF3 PE=1 SV=2                                                          | 0,231403936  | 2,14255  |
| P12277  | Creatine kinase B-type OS=Homo sapiens OX=9606 GN=CKB PE=1 SV=1                                                              | -0,203659892 | 2,132682 |
| Q9H074  | Polyadenylate-binding protein-interacting protein 1 OS=Homo sapiens OX=9606 GN=PAIP1 PE=1 SV=1                               | -0,472302093 | 2,131247 |

|        |                                                                                                                 |              |          |
|--------|-----------------------------------------------------------------------------------------------------------------|--------------|----------|
| Q8NBJ9 | SID1 transmembrane family member 2 OS=Homo sapiens OX=9606 GN=SIDT2 PE=1 SV=2                                   | -1,180521612 | 2,131186 |
| Q86Y33 | Cell division cycle protein 20 homolog B OS=Homo sapiens OX=9606 GN=CDC20B PE=1 SV=3                            | 1,663321493  | 2,130427 |
| Q9GZK7 | ATP-dependent RNA helicase DDX24 OS=Homo sapiens OX=9606 GN=DDX24 PE=1 SV=1                                     | 0,619586208  | 2,130077 |
| Q96RP9 | Elongation factor G, mitochondrial OS=Homo sapiens OX=9606 GN=GFM1 PE=1 SV=2                                    | -0,255537153 | 2,128465 |
| Q01780 | Exosome component 10 OS=Homo sapiens OX=9606 GN=EXOSC10 PE=1 SV=2                                               | -0,618215503 | 2,125712 |
| O75410 | Transforming acidic coiled-coil-containing protein 1 OS=Homo sapiens OX=9606 GN=TACCI1 PE=1 SV=2                | 1,174754344  | 2,124714 |
| P50479 | PDZ and LIM domain protein 4 OS=Homo sapiens OX=9606 GN=PDLIM4 PE=1 SV=2                                        | -0,254960899 | 2,122373 |
| P62258 | 14-3-3 protein epsilon OS=Homo sapiens OX=9606 GN=YWHAE PE=1 SV=1                                               | 0,178406904  | 2,121239 |
| Q6PKG0 | La-related protein 1 OS=Homo sapiens OX=9606 GN=LARP1 PE=1 SV=2                                                 | -0,160957065 | 2,118303 |
| O95218 | Zinc finger Ran-binding domain-containing protein 2 OS=Homo sapiens OX=9606 GN=ZRANB2 PE=1 SV=2                 | 0,348713907  | 2,117737 |
| Q12959 | Disks large homolog 1 OS=Homo sapiens OX=9606 GN=DLG1 PE=1 SV=2                                                 | 0,469414636  | 2,117393 |
| O95347 | Structural maintenance of chromosomes protein 2 OS=Homo sapiens OX=9606 GN=SMC2 PE=1 SV=2                       | -0,24074913  | 2,115693 |
| P12004 | Proliferating cell nuclear antigen OS=Homo sapiens OX=9606 GN=PCNA PE=1 SV=1                                    | 0,240650287  | 2,114581 |
| Q81Y81 | pre-rRNA 2'-O-ribose RNA methyltransferase FTSJ3 OS=Homo sapiens OX=9606 GN=FTSJ3 PE=1 SV=2                     | 0,614559443  | 2,114051 |
| Q15043 | Zinc transporter ZIP14 OS=Homo sapiens OX=9606 GN=SLC39A14 PE=1 SV=3                                            | 0,613558165  | 2,110853 |
| Q15907 | Ras-related protein Rab-11B OS=Homo sapiens OX=9606 GN=RAB11B PE=1 SV=4                                         | -0,170987061 | 2,110127 |
| Q6ZVM7 | TOM1-like protein 2 OS=Homo sapiens OX=9606 GN=TOM1L2 PE=1 SV=1                                                 | 0,239852559  | 2,105614 |
| Q9BV57 | 1,2-dihydroxy-3-keto-5-methylthiopentene dioxigenase OS=Homo sapiens OX=9606 GN=ADI1 PE=1 SV=1                  | -0,313810191 | 2,102987 |
| Q8NFA0 | Ubiquitin carboxyl-terminal hydrolase 32 OS=Homo sapiens OX=9606 GN=USP32 PE=1 SV=1                             | -0,1886984   | 2,102518 |
| Q8TC07 | TBC1 domain family member 15 OS=Homo sapiens OX=9606 GN=TBC1D15 PE=1 SV=2                                       | -0,466229963 | 2,102097 |
| P04792 | Heat shock protein beta-1 OS=Homo sapiens OX=9606 GN=HSPB1 PE=1 SV=2                                            | 0,172303293  | 2,100756 |
| P62195 | 26S proteasome regulatory subunit 8 OS=Homo sapiens OX=9606 GN=PSMCS5 PE=1 SV=1                                 | -0,172197269 | 2,099043 |
| Q9Y5F9 | Protocadherin gamma-B6 OS=Homo sapiens OX=9606 GN=PCDHGB6 PE=2 SV=1                                             | 1,151537653  | 2,098387 |
| P09497 | Clathrin light chain B OS=Homo sapiens OX=9606 GN=CLTB PE=1 SV=1                                                | -0,345871975 | 2,0973   |
| Q16543 | Hsp90 co-chaperone Cdc37 OS=Homo sapiens OX=9606 GN=CDC37 PE=1 SV=1                                             | 0,217381164  | 2,094308 |
| O95425 | Supervillin OS=Homo sapiens OX=9606 GN=SVIL PE=1 SV=2                                                           | -0,311216809 | 2,090754 |
| P09417 | Dihydropteridine reductase OS=Homo sapiens OX=9606 GN=QDPR PE=1 SV=2                                            | -0,34447974  | 2,087296 |
| P99999 | Cytochrome c OS=Homo sapiens OX=9606 GN=CYCS PE=1 SV=2                                                          | -0,311628478 | 2,085216 |
| Q9P1W8 | #N/D                                                                                                            | 0,227171118  | 2,084955 |
| Q13033 | Striatin-3 OS=Homo sapiens OX=9606 GN=STRN3 PE=1 SV=3                                                           | 0,286926412  | 2,084873 |
| Q9UP52 | #N/D                                                                                                            | 0,257820976  | 2,084098 |
| Q99704 | Docking protein 1 OS=Homo sapiens OX=9606 GN=DOK1 PE=1 SV=1                                                     | -0,286693048 | 2,082773 |
| P53618 | Coatomer subunit beta OS=Homo sapiens OX=9606 GN=COPB1 PE=1 SV=3                                                | 0,123881664  | 2,081283 |
| Q48634 | Protein PRRC2A OS=Homo sapiens OX=9606 GN=PRRC2A PE=1 SV=3                                                      | 0,60338823   | 2,078226 |
| Q724V5 | Hepatoma-derived growth factor-related protein 2 OS=Homo sapiens OX=9606 GN=HDGFL2 PE=1 SV=1                    | -1,133296483 | 2,07739  |
| O60573 | Eukaryotic translation initiation factor 4E type 2 OS=Homo sapiens OX=9606 GN=EIF4E2 PE=1 SV=1                  | -1,130807034 | 2,074503 |
| Q13191 | E3 ubiquitin-protein ligase CBL-B OS=Homo sapiens OX=9606 GN=CBLB PE=1 SV=2                                     | 0,34245266   | 2,072737 |
| Q8N5M9 | Protein jagunal homolog 1 OS=Homo sapiens OX=9606 GN=JAGN1 PE=1 SV=1                                            | 0,155409967  | 2,069266 |
| Q63ZV3 | KN motif and ankyrin repeat domain-containing protein 2 OS=Homo sapiens OX=9606 GN=KANK2 PE=1 SV=1              | 0,206634523  | 2,068361 |
| O14929 | Histone acetyltransferase type B catalytic subunit OS=Homo sapiens OX=9606 GN=HAT1 PE=1 SV=1                    | -0,458522142 | 2,065014 |
| Q8N5K1 | CDGSH iron-sulfur domain-containing protein 2 OS=Homo sapiens OX=9606 GN=CISD2 PE=1 SV=1                        | 1,122057857  | 2,064315 |
| P98160 | Basement membrane-specific heparan sulfate proteoglycan core protein OS=Homo sapiens OX=9606 GN=HSPG2 PE=1 SV=4 | 0,26509637   | 2,062452 |
| O94919 | Endonuclease domain-containing 1 protein OS=Homo sapiens OX=9606 GN=ENDOD1 PE=1 SV=2                            | -0,340256993 | 2,059579 |
| P17931 | Galectin-3 OS=Homo sapiens OX=9606 GN=LGALS3 PE=1 SV=5                                                          | -0,283770973 | 2,056509 |
| Q9UM22 | Mammalian ependymin-related protein 1 OS=Homo sapiens OX=9606 GN=EPDR1 PE=1 SV=2                                | -0,59660891  | 2,05638  |
| P49406 | 39S ribosomal protein L19, mitochondrial OS=Homo sapiens OX=9606 GN=MRPL19 PE=1 SV=2                            | -0,456442631 | 2,054994 |
| Q9Y5X1 | Sorting nexin-9 OS=Homo sapiens OX=9606 GN=SNX9 PE=1 SV=1                                                       | 0,205424625  | 2,05263  |
| Q15436 | Protein transport protein Sec23A OS=Homo sapiens OX=9606 GN=SEC23A PE=1 SV=2                                    | 0,134270314  | 2,049852 |
| O00115 | Deoxyribonuclease-2-alpha OS=Homo sapiens OX=9606 GN=DNASE2 PE=1 SV=2                                           | -0,45536953  | 2,049821 |
| P51970 | NADH dehydrogenase [ubiquinone] 1 alpha subcomplex subunit 8 OS=Homo sapiens OX=9606 GN=NDUFA8 PE=1 SV=3        | -0,454893227 | 2,047525 |
| Q9UG63 | ATP-binding cassette sub-family F member 2 OS=Homo sapiens OX=9606 GN=ABCF2 PE=1 SV=2                           | 0,190476155  | 2,046108 |
| P43007 | Neutral amino acid transporter A OS=Homo sapiens OX=9606 GN=SLC1A4 PE=1 SV=1                                    | -0,454579476 | 2,046012 |
| Q6PGP7 | Tetrapeptide repeat protein 37 OS=Homo sapiens OX=9606 GN=TPC37 PE=1 SV=1                                       | -0,197115633 | 2,043592 |
| Q15388 | Mitochondrial import receptor subunit TOM20 homolog OS=Homo sapiens OX=9606 GN=TOMM20 PE=1 SV=1                 | -0,592403697 | 2,04277  |
| Q96AE4 | Far upstream element-binding protein 1 OS=Homo sapiens OX=9606 GN=FUBP1 PE=1 SV=3                               | 0,168657779  | 2,042131 |
| Q12974 | Protein tyrosine phosphatase type IVA 2 OS=Homo sapiens OX=9606 GN=PTPAA2 PE=1 SV=1                             | -0,337781618 | 2,039229 |
| P83111 | Serine beta-lactamase-like protein LACTB, mitochondrial OS=Homo sapiens OX=9606 GN=LACTB PE=1 SV=2              | -0,337649548 | 2,038282 |
| O94856 | Neurofascin OS=Homo sapiens OX=9606 GN=NFASC PE=1 SV=4                                                          | 1,099431069  | 2,037661 |
| P04040 | Catalase OS=Homo sapiens OX=9606 GN=CAT PE=1 SV=3                                                               | 0,168256954  | 2,03572  |
| P48147 | Prolyl 4-hydroxylase OS=Homo sapiens OX=9606 GN=PREP PE=1 SV=2                                                  | -0,15982517  | 2,033799 |
| P62745 | Rho-related GTP-binding protein RhoB OS=Homo sapiens OX=9606 GN=RHOB PE=1 SV=1                                  | 0,451403139  | 2,030687 |
| P0CG30 | Glutathione S-transferase theta-2B OS=Homo sapiens OX=9606 GN=GSTT2B PE=1 SV=1                                  | 0,451304846  | 2,030212 |
| Q43310 | CBP80/20-dependent translation initiation factor OS=Homo sapiens OX=9606 GN=CTIF PE=1 SV=1                      | 0,451208804  | 2,029749 |
| Q9BQA1 | Methylosome protein 50 OS=Homo sapiens OX=9606 GN=WDR77 PE=1 SV=1                                               | 0,280274082  | 2,025164 |
| Q7L5N1 | COP9 signalosome complex subunit 6 OS=Homo sapiens OX=9606 GN=COPS6 PE=1 SV=1                                   | 0,245672936  | 2,024792 |
| Q99836 | Myeloid differentiation primary response protein MyD88 OS=Homo sapiens OX=9606 GN=MYD88 PE=1 SV=1               | 1,088570594  | 2,024708 |
| Q53FA7 | Quinone oxidoreductase PI3 OS=Homo sapiens OX=9606 GN=TP53I3 PE=1 SV=2                                          | -0,232488864 | 2,023319 |
| P61626 | Lysozyme C OS=Homo sapiens OX=9606 GN=LYZ PE=1 SV=1                                                             | -0,586316049 | 2,023001 |
| P78417 | Glutathione S-transferase omega-1 OS=Homo sapiens OX=9606 GN=GSTO1 PE=1 SV=2                                    | -0,188761259 | 2,022041 |
| Q9NWT6 | Hypoxia-inducible factor 1-alpha inhibitor OS=Homo sapiens OX=9606 GN=HIF1AN PE=1 SV=2                          | 1,085824102  | 2,021416 |
| Q8TB46 | Golgin subfamily A member 5 OS=Homo sapiens OX=9606 GN=GOLGA5 PE=1 SV=3                                         | -0,303700563 | 2,020838 |
| P61081 | NEED8-conjugating enzyme Ubc12 OS=Homo sapiens OX=9606 GN=UBE2M PE=1 SV=1                                       | 0,379288719  | 2,018953 |
| Q9HA65 | TBC1 domain family member 17 OS=Homo sapiens OX=9606 GN=TBC1D17 PE=1 SV=2                                       | -1,328576694 | 2,017891 |
| Q7Z3J2 | VPS35 endosomal protein sorting factor-like OS=Homo sapiens OX=9606 GN=VPS35L PE=1 SV=2                         | 0,22064255   | 2,015129 |
| Q9P0J0 | NADH dehydrogenase [ubiquinone] 1 alpha subcomplex subunit 13 OS=Homo sapiens OX=9606 GN=NDUFA13 PE=1 SV=3      | -0,582792144 | 2,011521 |
| Q9UP95 | Solute carrier family 12 member 4 OS=Homo sapiens OX=9606 GN=SLC12A4 PE=1 SV=2                                  | 0,220143125  | 2,009269 |
| P31146 | Coronin-1A OS=Homo sapiens OX=9606 GN=CORO1A PE=1 SV=4                                                          | 0,497807126  | 2,005354 |
| Q99613 | Eukaryotic translation initiation factor 3 subunit C OS=Homo sapiens OX=9606 GN=EIF3C PE=1 SV=1                 | 0,132059058  | 2,004791 |
| P49419 | Alpha-aminoacidic semialdehyde dehydrogenase OS=Homo sapiens OX=9606 GN=ALDH7A1 PE=1 SV=5                       | -0,170807289 | 2,002774 |
| Q9H446 | RWD domain-containing protein 1 OS=Homo sapiens OX=9606 GN=RWD1 PE=1 SV=1                                       | 0,308136094  | 2,002732 |
| P01892 | HLA class I histocompatibility antigen, A-2 alpha chain OS=Homo sapiens OX=9606 GN=HLA-A PE=1 SV=1              | -0,219415365 | 2,000738 |
| O15382 | Branched-chain-amino-acid aminotransferase, mitochondrial OS=Homo sapiens OX=9606 GN=BCAT2 PE=1 SV=2            | -1,068677219 | 2,000707 |
| P16930 | Fumarylacetoacetase OS=Homo sapiens OX=9606 GN=FAH PE=1 SV=2                                                    | -0,376238712 | 2,000376 |
| P46109 | Crk-like protein OS=Homo sapiens OX=9606 GN=CRKL PE=1 SV=1                                                      | 0,332216542  | 1,999382 |
| O95302 | Peptidyl-prolyl cis-trans isomerase FKBP9 OS=Homo sapiens OX=9606 GN=FKBP9 PE=1 SV=2                            | -0,170473121 | 1,997617 |
| Q9HC38 | Glyoxalase domain-containing protein 4 OS=Homo sapiens OX=9606 GN=GLOD4 PE=1 SV=1                               | 0,300108604  | 1,991776 |
| P45974 | Ubiquitin carboxyl-terminal hydrolase 5 OS=Homo sapiens OX=9606 GN=USP5 PE=1 SV=2                               | -0,135936771 | 1,989287 |
| Q9N569 | Mitochondrial import receptor subunit TOM22 homolog OS=Homo sapiens OX=9606 GN=TOMM22 PE=1 SV=3                 | 0,57578214   | 1,988607 |
| Q643R3 | Lysophospholipid acyltransferase LPCAT4 OS=Homo sapiens OX=9606 GN=LPCAT4 PE=1 SV=1                             | 1,056734495  | 1,986124 |
| P61978 | Heterogeneous nuclear ribonucleoprotein K OS=Homo sapiens OX=9606 GN=HNRNPK PE=1 SV=1                           | 0,143753886  | 1,986061 |
| P35658 | Nuclear pore complex protein Nup214 OS=Homo sapiens OX=9606 GN=NUP214 PE=1 SV=2                                 | 0,24181207   | 1,984567 |
| Q6P995 | Protein FAM171B OS=Homo sapiens OX=9606 GN=FAM171B PE=2 SV=3                                                    | -0,597323957 | 1,982862 |
| Q9HC35 | Echinoderm microtubule-associated protein-like 4 OS=Homo sapiens OX=9606 GN=EML4 PE=1 SV=3                      | -0,217846527 | 1,982384 |
| Q9UNM6 | 26S proteasome non-ATPase regulatory subunit 13 OS=Homo sapiens OX=9606 GN=PSMD13 PE=1 SV=2                     | -0,17981832  | 1,980907 |
| O60925 | Prefoldin subunit 1 OS=Homo sapiens OX=9606 GN=PFN1 PE=1 SV=2                                                   | 0,298595981  | 1,979559 |
| Q00169 | Phosphatidylinositol transfer protein alpha isoform OS=Homo sapiens OX=9606 GN=PITPNA PE=1 SV=2                 | 0,329437392  | 1,979515 |
| O95071 | E3 ubiquitin-protein ligase UBR5 OS=Homo sapiens OX=9606 GN=UBR5 PE=1 SV=2                                      | -0,674742483 | 1,974869 |
| P45877 | Peptidyl-prolyl cis-trans isomerase C OS=Homo sapiens OX=9606 GN=PPIC PE=1 SV=1                                 | -0,502381352 | 1,973146 |

|        |                                                                                                                         |              |          |
|--------|-------------------------------------------------------------------------------------------------------------------------|--------------|----------|
| Q14746 | Conserved oligomeric Golgi complex subunit 2 OS=Homo sapiens OX=9606 GN=COG2 PE=1 SV=1                                  | -1,046189643 | 1,973138 |
| A6NK85 | Pecanex-like protein 2 OS=Homo sapiens OX=9606 GN=PCNX2 PE=2 SV=3                                                       | 1,556135836  | 1,972057 |
| Q965Y0 | Integrator complex subunit 14 OS=Homo sapiens OX=9606 GN=INTS14 PE=1 SV=2                                               | -0,699931916 | 1,969432 |
| Q9GZ73 | SRA stem-loop-interacting RNA-binding protein, mitochondrial OS=Homo sapiens OX=9606 GN=SLIRP PE=1 SV=1                 | -0,370617712 | 1,966152 |
| Q14344 | Guanine nucleotide-binding protein subunit alpha-13 OS=Homo sapiens OX=9606 GN=GNA13 PE=1 SV=2                          | -0,327324143 | 1,964423 |
| P61163 | Alpha-centractin OS=Homo sapiens OX=9606 GN=ACTR1A PE=1 SV=1                                                            | 0,168198295  | 1,962634 |
| Q9UI12 | V-type proton ATPase subunit H OS=Homo sapiens OX=9606 GN=ATP6V1H PE=1 SV=1                                             | 0,216131788  | 1,962377 |
| P30046 | D-dopachrome decarboxylase OS=Homo sapiens OX=9606 GN=DDT PE=1 SV=3                                                     | -0,327026713 | 1,9623   |
| O95817 | BAG family molecular chaperone regulator 3 OS=Homo sapiens OX=9606 GN=BAG3 PE=1 SV=3                                    | 0,187520678  | 1,962223 |
| Q07021 | Complement component 1 Q subcomponent-binding protein, mitochondrial OS=Homo sapiens OX=9606 GN=C1QBP PE=1 SV=1         | -0,296173813 | 1,960021 |
| Q9NTJ3 | Structural maintenance of chromosomes protein 4 OS=Homo sapiens OX=9606 GN=SMC4 PE=1 SV=2                               | -0,215848267 | 1,959074 |
| Q66K74 | Microtubule-associated protein 15 OS=Homo sapiens OX=9606 GN=MAP15 PE=1 SV=2                                            | -0,254420938 | 1,958803 |
| P20339 | Ras-related protein Rab-5A OS=Homo sapiens OX=9606 GN=RAB5A PE=1 SV=2                                                   | 0,326348998  | 1,957463 |
| O15514 | DNA-directed RNA polymerase II subunit RPB4 OS=Homo sapiens OX=9606 GN=POLR2D PE=1 SV=1                                 | -1,033273702 | 1,957088 |
| Q13042 | Cell division cycle protein 16 homolog OS=Homo sapiens OX=9606 GN=CDC16 PE=1 SV=2                                       | 0,566163007  | 1,956995 |
| Q9H117 | Protein Wnt-5b OS=Homo sapiens OX=9606 GN=WNT5B PE=2 SV=2                                                               | -0,325768537 | 1,953322 |
| P50452 | Serpine B8 OS=Homo sapiens OX=9606 GN=SERPINB8 PE=1 SV=2                                                                | -0,226147685 | 1,953159 |
| P84103 | Serine/arginine-rich splicing factor 3 OS=Homo sapiens OX=9606 GN=SRSF3 PE=1 SV=1                                       | 0,368272531  | 1,951879 |
| Q9H7F0 | Probable cation-transporting ATPase 13A3 OS=Homo sapiens OX=9606 GN=ATP13A3 PE=1 SV=4                                   | -0,459143533 | 1,949043 |
| P35749 | #N/D                                                                                                                    | 0,225743444  | 1,948709 |
| Q8UII8 | Cytokine receptor-like factor 3 OS=Homo sapiens OX=9606 GN=CRLF3 PE=1 SV=2                                              | 0,409366597  | 1,94495  |
| O43752 | Syntaxin-6 OS=Homo sapiens OX=9606 GN=STX6 PE=1 SV=1                                                                    | 1,023282521  | 1,944563 |
| O43402 | ER membrane protein complex subunit 8 OS=Homo sapiens OX=9606 GN=EMC8 PE=1 SV=1                                         | 0,433405547  | 1,943603 |
| P61619 | Protein transport protein Sec61 subunit alpha isoform 1 OS=Homo sapiens OX=9606 GN=SEC61A1 PE=1 SV=2                    | 0,205090134  | 1,942575 |
| Q8WUI4 | Histone deacetylase 7 OS=Homo sapiens OX=9606 GN=HDAC7 PE=1 SV=2                                                        | 1,019699032  | 1,940047 |
| P19367 | Hexokinase-1 OS=Homo sapiens OX=9606 GN=HK1 PE=1 SV=3                                                                   | 0,115867317  | 1,938063 |
| P51659 | Peroxisomal multifunctional enzyme type 2 OS=Homo sapiens OX=9606 GN=HSD17B4 PE=1 SV=3                                  | 0,154012324  | 1,936554 |
| P62263 | 40S ribosomal protein S14 OS=Homo sapiens OX=9606 GN=RPS14 PE=1 SV=3                                                    | 0,251953437  | 1,935021 |
| Q9UB54 | DnaJ homolog subfamily B member 11 OS=Homo sapiens OX=9606 GN=DNAJB11 PE=1 SV=1                                         | 0,29169323   | 1,923966 |
| O15254 | Peroxisomal acyl-coenzyme A oxidase 3 OS=Homo sapiens OX=9606 GN=ACOX3 PE=1 SV=2                                        | -0,321551715 | 1,923267 |
| P13284 | Gamma-interferon-inducible lysosomal thiol reductase OS=Homo sapiens OX=9606 GN=IFI30 PE=1 SV=3                         | -1,005986119 | 1,922649 |
| O14949 | Cytochrome b-c1 complex subunit 8 OS=Homo sapiens OX=9606 GN=UQCRCQ PE=1 SV=4                                           | 0,555704513  | 1,922405 |
| Q70UQ0 | Inhibitor of nuclear factor kappa-B kinase-interacting protein OS=Homo sapiens OX=9606 GN=IKBIP PE=1 SV=1               | 0,175724041  | 1,922151 |
| Q5RI15 | Cytochrome c oxidase assembly protein COX20, mitochondrial OS=Homo sapiens OX=9606 GN=COX20 PE=1 SV=2                   | 1,004137253  | 1,920289 |
| P27348 | 14-3-3 protein theta OS=Homo sapiens OX=9606 GN=YWHAQ PE=1 SV=1                                                         | 0,223071434  | 1,919364 |
| Q8N9N8 | Probable RNA-binding protein EIF1AD OS=Homo sapiens OX=9606 GN=EIF1AD PE=1 SV=1                                         | -0,743284861 | 1,918575 |
| Q9BY43 | Charged multivesicular body protein 4a OS=Homo sapiens OX=9606 GN=CHMP4A PE=1 SV=3                                      | -0,320812988 | 1,918008 |
| O94875 | Sorbin and SH3 domain-containing protein 2 OS=Homo sapiens OX=9606 GN=SORSB2 PE=1 SV=3                                  | 0,202850313  | 1,915288 |
| Q8I281 | ELMO domain-containing protein 2 OS=Homo sapiens OX=9606 GN=ELMOD2 PE=1 SV=1                                            | 0,36222296   | 1,915079 |
| P11169 | Solute carrier family 2, facilitated glucose transporter member 3 OS=Homo sapiens OX=9606 GN=SLC2A3 PE=1 SV=1           | 0,998349577  | 1,912879 |
| P51991 | Heterogeneous nuclear ribonucleoprotein A3 OS=Homo sapiens OX=9606 GN=HNRNPA3 PE=1 SV=2                                 | 0,194525472  | 1,91258  |
| O00303 | Eukaryotic translation initiation factor 3 subunit F OS=Homo sapiens OX=9606 GN=EIF3F PE=1 SV=1                         | -0,222427115 | 1,912306 |
| Q9Y266 | Nuclear migration protein nudC OS=Homo sapiens OX=9606 GN=NUDC PE=1 SV=1                                                | 0,175024683  | 1,912173 |
| Q5T880 | Centrosomal protein of 162 kDa OS=Homo sapiens OX=9606 GN=CEP162 PE=1 SV=2                                              | 0,326511857  | 1,91178  |
| Q9UHN6 | Cell surface hyaluronidase OS=Homo sapiens OX=9606 GN=CEMP12 PE=1 SV=1                                                  | -0,552426707 | 1,911517 |
| P31350 | Ribonucleoside-diphosphate reductase subunit M2 OS=Homo sapiens OX=9606 GN=RRM2 PE=1 SV=1                               | -0,552049028 | 1,910261 |
| Q99685 | Monoglyceride lipase OS=Homo sapiens OX=9606 GN=MGLL PE=1 SV=2                                                          | -0,249165111 | 1,90823  |
| P00390 | Glutathione reductase, mitochondrial OS=Homo sapiens OX=9606 GN=GSR PE=1 SV=2                                           | -0,221983895 | 1,907455 |
| Q9BPX3 | Condensin complex subunit 3 OS=Homo sapiens OX=9606 GN=NCAPG PE=1 SV=1                                                  | -0,319086761 | 1,905725 |
| P61221 | ATP-binding cassette sub-family E member 1 OS=Homo sapiens OX=9606 GN=ABCE1 PE=1 SV=1                                   | -0,174366493 | 1,902779 |
| Q5W111 | SPRY domain-containing protein 7 OS=Homo sapiens OX=9606 GN=SPRY7 PE=1 SV=2                                             | -0,549785927 | 1,902729 |
| Q9BYN0 | Sulfiredoxin-1 OS=Homo sapiens OX=9606 GN=SRXN1 PE=1 SV=2                                                               | -0,548716247 | 1,899165 |
| Q16795 | NADH dehydrogenase [ubiquinone] 1 alpha subcomplex subunit 9, mitochondrial OS=Homo sapiens OX=9606 GN=NDUFA9 PE=1 SV=2 | 0,248009477  | 1,897152 |
| Q6ZY14 | General transcription factor IIH subunit 5 OS=Homo sapiens OX=9606 GN=GTTF5 PE=1 SV=1                                   | -0,986111606 | 1,8971   |
| O95864 | Acyl-CoA 6-desaturase OS=Homo sapiens OX=9606 GN=FADS2 PE=1 SV=1                                                        | -0,382140514 | 1,896924 |
| Q92538 | Golgi-specific brefeldin A-resistance guanine nucleotide exchange factor 1 OS=Homo sapiens OX=9606 GN=GBF1 PE=1 SV=2    | 0,148090938  | 1,896791 |
| P30825 | High affinity cationic amino acid transporter 1 OS=Homo sapiens OX=9606 GN=SLC7A1 PE=1 SV=1                             | -0,423638117 | 1,89618  |
| Q9H4A6 | Golgi phosphoprotein 3 OS=Homo sapiens OX=9606 GN=GOLPH3 PE=1 SV=1                                                      | 0,247889047  | 1,895998 |
| Q8NBQ5 | Estradiol 17-beta-dehydrogenase 11 OS=Homo sapiens OX=9606 GN=HSD17B11 PE=1 SV=3                                        | 0,317624283  | 1,895326 |
| P52298 | Nuclear cap-binding protein subunit 2 OS=Homo sapiens OX=9606 GN=NCBP2 PE=1 SV=1                                        | 0,984229674  | 1,89466  |
| Q9B067 | Glutamate-rich WD repeat-containing protein 1 OS=Homo sapiens OX=9606 GN=GRWD1 PE=1 SV=1                                | 0,422971302  | 1,892939 |
| P53365 | Arfaptin-2 OS=Homo sapiens OX=9606 GN=ARFP2 PE=1 SV=1                                                                   | -0,546069595 | 1,890337 |
| Q16822 | Phosphoenolpyruvate carboxykinase [GTP], mitochondrial OS=Homo sapiens OX=9606 GN=PCK2 PE=1 SV=4                        | -0,147664445 | 1,889595 |
| Q8WZ82 | Esterase OC2 OS=Homo sapiens OX=9606 GN=OVCA2 PE=1 SV=1                                                                 | 0,316404375  | 1,886658 |
| Q99543 | DnaJ homolog subfamily C member 2 OS=Homo sapiens OX=9606 GN=DNAJC2 PE=1 SV=4                                           | -0,421000023 | 1,883354 |
| O60216 | DnaJ double-strand-break repair protein rad21 homolog OS=Homo sapiens OX=9606 GN=RAD21 PE=1 SV=2                        | 0,420989146  | 1,883301 |
| Q9BV68 | E3 ubiquitin-protein ligase RNF126 OS=Homo sapiens OX=9606 GN=RNF126 PE=1 SV=2                                          | -0,971300752 | 1,877798 |
| Q9Y6C9 | Mitochondrial carrier homolog 2 OS=Homo sapiens OX=9606 GN=MTCH2 PE=1 SV=1                                              | -0,263622384 | 1,877264 |
| Q9NTI5 | Sister chromatid cohesion protein PDS5 homolog B OS=Homo sapiens OX=9606 GN=PDS5B PE=1 SV=1                             | 0,263597504  | 1,877045 |
| Q96L17 | Dehydrogenase/reductase SDR family member 1 OS=Homo sapiens OX=9606 GN=DHRS1 PE=1 SV=1                                  | -0,541963381 | 1,876613 |
| Q05397 | Focal adhesion kinase 1 OS=Homo sapiens OX=9606 GN=PTK2 PE=1 SV=2                                                       | 0,69022394   | 1,875776 |
| P55209 | Nucleosome assembly protein 1-like 1 OS=Homo sapiens OX=9606 GN=NAP1L1 PE=1 SV=1                                        | 0,231248556  | 1,875564 |
| Q9P287 | Succinate-CoA ligase [ADP-forming] subunit beta, mitochondrial OS=Homo sapiens OX=9606 GN=SUCLA2 PE=1 SV=3              | -0,245694872 | 1,875009 |
| Q9BX84 | Oxysterol-binding protein-related protein 11 OS=Homo sapiens OX=9606 GN=OSBPL11 PE=1 SV=2                               | -1,08971948  | 1,873748 |
| Q96Q27 | Membrane-associated guanylate kinase, WW and PDZ domain-containing protein 1 OS=Homo sapiens OX=9606 GN=MAGI1 PE=1 SV=3 | -1,708745643 | 1,873561 |
| Q96S06 | Lipase maturation factor 1 OS=Homo sapiens OX=9606 GN=LMF1 PE=1 SV=1                                                    | 1,069253869  | 1,872537 |
| Q9Y4C2 | TRPM8 channel-associated factor 1 OS=Homo sapiens OX=9606 GN=TCAF1 PE=1 SV=3                                            | -0,418426422 | 1,870835 |
| Q9P000 | COMM domain-containing protein 9 OS=Homo sapiens OX=9606 GN=COMM9 PE=1 SV=2                                             | -0,284864791 | 1,86924  |
| Q8WUW7 | TBC1 domain family member 22A OS=Homo sapiens OX=9606 GN=TBC1D22A PE=1 SV=2                                             | 0,571795843  | 1,869069 |
| O14983 | Sarcoplasmic/endoplasmic reticulum calcium ATPase 1 OS=Homo sapiens OX=9606 GN=ATP2A1 PE=1 SV=1                         | 1,358748948  | 1,866604 |
| P60520 | Gamma-aminobutyric acid receptor-associated protein-like 2 OS=Homo sapiens OX=9606 GN=GABARAPL2 PE=1 SV=1               | 0,417345254  | 1,865574 |
| O95070 | Protein YIF1A OS=Homo sapiens OX=9606 GN=YIF1A PE=1 SV=2                                                                | 0,538308232  | 1,865367 |
| P63279 | SUMO-conjugating enzyme UBC9 OS=Homo sapiens OX=9606 GN=UBE1 PE=1 SV=1                                                  | -0,262100593 | 1,863865 |
| Q76094 | Signal recognition particle subunit SRP72 OS=Homo sapiens OX=9606 GN=SRP72 PE=1 SV=3                                    | 0,177248542  | 1,862849 |
| O60784 | Target of Myb protein 1 OS=Homo sapiens OX=9606 GN=TOM1 PE=1 SV=2                                                       | -0,177217267 | 1,862422 |
| P41250 | Glycine-tRNA ligase OS=Homo sapiens OX=9606 GN=GARS PE=1 SV=3                                                           | -0,120918674 | 1,861519 |
| Q9Y3B3 | Transmembrane emp24 domain-containing protein 7 OS=Homo sapiens OX=9606 GN=TMED7 PE=1 SV=2                              | 0,283789639  | 1,860649 |
| P62633 | Cellular nucleic acid-binding protein OS=Homo sapiens OX=9606 GN=CNBP PE=1 SV=1                                         | -0,31217774  | 1,856662 |
| Q96C53 | FA5-associated factor 2 OS=Homo sapiens OX=9606 GN=FAF2 PE=1 SV=2                                                       | 0,229329915  | 1,855935 |
| Q9HXK2 | Anthrax toxin receptor 1 OS=Homo sapiens OX=9606 GN=ANTXR1 PE=1 SV=2                                                    | -0,535710137 | 1,855645 |
| Q9Y2G5 | GDP-fucose protein O-fucosyltransferase 2 OS=Homo sapiens OX=9606 GN=POFUT2 PE=1 SV=3                                   | 0,206885669  | 1,855498 |
| Q08945 | FACT complex subunit SSRP1 OS=Homo sapiens OX=9606 GN=SSRP1 PE=1 SV=1                                                   | -0,260981733 | 1,854026 |
| Q8TAT6 | Nuclear protein localization protein 4 homolog OS=Homo sapiens OX=9606 GN=NPLC4 PE=1 SV=3                               | 0,206641837  | 1,852703 |
| Q13733 | #N/D                                                                                                                    | 0,351725587  | 1,851299 |
| Q9Y679 | Ancient ubiquitous protein 1 OS=Homo sapiens OX=9606 GN=AUP1 PE=1 SV=2                                                  | 0,95048319   | 1,850279 |
| Q96A26 | Protein FAM162A OS=Homo sapiens OX=9606 GN=FAM162A PE=1 SV=2                                                            | 0,950034918  | 1,849681 |
| Q12905 | Interleukin enhancer-binding factor 2 OS=Homo sapiens OX=9606 GN=ILF2 PE=1 SV=2                                         | -0,216398399 | 1,84661  |
| Q9BWH6 | RNA polymerase II-associated protein 1 OS=Homo sapiens OX=9606 GN=RPAP1 PE=1 SV=3                                       | -0,057525467 | 1,845384 |

|         |                                                                                                               |              |          |
|---------|---------------------------------------------------------------------------------------------------------------|--------------|----------|
| P21266  | Glutathione S-transferase Mu 3 OS=Homo sapiens OX=9606 GN=GSTM3 PE=1 SV=3                                     | 0,175953439  | 1,845203 |
| O95571  | Persulfide dioxygenase ETHE1, mitochondrial OS=Homo sapiens OX=9606 GN=ETHE1 PE=1 SV=2                        | -0,310530774 | 1,844991 |
| Q8N573  | Oxidation resistance protein 1 OS=Homo sapiens OX=9606 GN=ORX1 PE=1 SV=2                                      | -0,412975536 | 1,844299 |
| Q8TDY2  | RB1-inducible coiled-coil protein 1 OS=Homo sapiens OX=9606 GN=RB1CC1 PE=1 SV=3                               | 1,329183286  | 1,844052 |
| Q99460  | 26S proteasome non-ATPase regulatory subunit 1 OS=Homo sapiens OX=9606 GN=PSMD1 PE=1 SV=2                     | 0,123958096  | 1,842886 |
| Q9H000  | Probable E3 ubiquitin-protein ligase makorin-2 OS=Homo sapiens OX=9606 GN=MKRN2 PE=1 SV=2                     | -0,531786415 | 1,842449 |
| Q9Y5L0  | Transportin-3 OS=Homo sapiens OX=9606 GN=TNPO3 PE=1 SV=3                                                      | 0,242193424  | 1,841163 |
| Q8N556  | Actin filament-associated protein 1 OS=Homo sapiens OX=9606 GN=AFAP1 PE=1 SV=2                                | -0,205581562 | 1,840561 |
| Q13363  | C-terminal-binding protein 1 OS=Homo sapiens OX=9606 GN=CTBP1 PE=1 SV=2                                       | -0,349558152 | 1,838145 |
| P49768  | Presenilin-1 OS=Homo sapiens OX=9606 GN=PSEN1 PE=1 SV=1                                                       | -0,431390204 | 1,838051 |
| P82650  | 28S ribosomal protein S22, mitochondrial OS=Homo sapiens OX=9606 GN=MRPS22 PE=1 SV=1                          | -0,349459481 | 1,837546 |
| Q8WWWX9 | Selenoprotein M OS=Homo sapiens OX=9606 GN=SELENOM PE=1 SV=3                                                  | -0,411371593 | 1,836486 |
| Q8WXI9  | Transcriptional repressor p66-beta OS=Homo sapiens OX=9606 GN=GATAD2B PE=1 SV=1                               | 0,133245139  | 1,834783 |
| Q9Y2E5  | Epididymis-specific alpha-mannosidase OS=Homo sapiens OX=9606 GN=MAN2B2 PE=1 SV=4                             | -0,938265758 | 1,833913 |
| Q7Z478  | ATP-dependent RNA helicase DHX29 OS=Homo sapiens OX=9606 GN=DHX29 PE=1 SV=2                                   | 0,258617342  | 1,833271 |
| P38571  | Lysosomal acid lipase/cholesterol ester hydrolase OS=Homo sapiens OX=9606 GN=LIPA PE=1 SV=2                   | -0,936349917 | 1,831332 |
| O14980  | Exportin-1 OS=Homo sapiens OX=9606 GN=XPO1 PE=1 SV=1                                                          | 0,115837097  | 1,830923 |
| Q9Y4W6  | AFG3-like protein 2 OS=Homo sapiens OX=9606 GN=AFG3L2 PE=1 SV=2                                               | -0,258122091 | 1,828893 |
| P36915  | Guanine nucleotide-binding protein-like 1 OS=Homo sapiens OX=9606 GN=GNL1 PE=1 SV=2                           | -0,347887315 | 1,828008 |
| P07951  | Tropomyosin beta chain OS=Homo sapiens OX=9606 GN=TPM2 PE=1 SV=1                                              | 0,279586371  | 1,827129 |
| Q9UPN7  | Serine/threonine-protein phosphatase 6 regulatory subunit 1 OS=Homo sapiens OX=9606 GN=PPP6R1 PE=1 SV=5       | -0,347699045 | 1,826866 |
| Q8WUW1  | Protein Churchill OS=Homo sapiens OX=9606 GN=CHURC1 PE=1 SV=2                                                 | -1,05305369  | 1,823469 |
| Q13123  | Protein Red OS=Homo sapiens OX=9606 GN=IK PE=1 SV=3                                                           | -0,408300044 | 1,821516 |
| Q43169  | Cytochrome b5 type B OS=Homo sapiens OX=9606 GN=CYB5B PE=1 SV=3                                               | -0,346483317 | 1,819493 |
| P11498  | Pyruvate carboxylase, mitochondrial OS=Homo sapiens OX=9606 GN=PC PE=1 SV=2                                   | -0,142710467 | 1,818966 |
| Q6ZSR9  | Uncharacterized protein FLJ45252 OS=Homo sapiens OX=9606 PE=2 SV=2                                            | 0,407721871  | 1,818698 |
| Q4YV16  | Transmembrane protein 119 OS=Homo sapiens OX=9606 GN=TMEM119 PE=1 SV=1                                        | 0,346338369  | 1,818614 |
| Q8NF37  | Lysophosphatidylcholine acyltransferase 1 OS=Homo sapiens OX=9606 GN=LPCAT1 PE=1 SV=2                         | 0,524014348  | 1,816217 |
| P51531  | Probable global transcription activator SNF2L2 OS=Homo sapiens OX=9606 GN=SMARCA2 PE=1 SV=2                   | 0,333591044  | 1,813858 |
| Q14934  | Nuclear factor of activated T-cells, cytoplasmic 4 OS=Homo sapiens OX=9606 GN=NFBATC4 PE=1 SV=2               | -0,305289625 | 1,807914 |
| P25705  | ATP synthase subunit alpha, mitochondrial OS=Homo sapiens OX=9606 GN=ATP5F1A PE=1 SV=1                        | 0,126434445  | 1,80703  |
| Q16706  | Alpha-mannosidase 2 OS=Homo sapiens OX=9606 GN=MAN2A1 PE=1 SV=2                                               | -0,521234776 | 1,806806 |
| P12110  | Collagen alpha-2(VI) chain OS=Homo sapiens OX=9606 GN=COL6A2 PE=1 SV=4                                        | -0,142711199 | 1,806733 |
| O15321  | Transmembrane 9 superfamily member 1 OS=Homo sapiens OX=9606 GN=TM9SF1 PE=2 SV=2                              | 0,917680478  | 1,805968 |
| P20674  | Cytochrome c oxidase subunit 5A, mitochondrial OS=Homo sapiens OX=9606 GN=COX5A PE=1 SV=2                     | -0,276687295 | 1,804074 |
| Q68CQ7  | Glycosyltransferase 8 domain-containing protein 1 OS=Homo sapiens OX=9606 GN=GLT8D1 PE=1 SV=2                 | -0,915456771 | 1,802921 |
| Q15717  | ELAV-like protein 1 OS=Homo sapiens OX=9606 GN=ELAVL1 PE=1 SV=2                                               | 0,223779984  | 1,799459 |
| P09651  | Heterogeneous nuclear ribonucleoprotein A1 OS=Homo sapiens OX=9606 GN=HNRNP1 PE=1 SV=5                        | -0,185444294 | 1,798221 |
| P07947  | Tyrosine-protein kinase Yes OS=Homo sapiens OX=9606 GN=YES1 PE=1 SV=3                                         | -0,342810844 | 1,79723  |
| Q69B1   | Dynein heavy chain 8, axonemal OS=Homo sapiens OX=9606 GN=DNAH8 PE=1 SV=2                                     | 0,247607185  | 1,796023 |
| Q8TD55  | Plectstrin homology domain-containing family O member 2 OS=Homo sapiens OX=9606 GN=PLEKHO2 PE=1 SV=1          | 0,303539965  | 1,795559 |
| P00374  | Dihydrofolate reductase OS=Homo sapiens OX=9606 GN=DHFR PE=1 SV=2                                             | -0,908548509 | 1,793419 |
| Q9Y3C6  | Pyridyl-cis-trans isomerase-like 1 OS=Homo sapiens OX=9606 GN=PP1L1 PE=1 SV=1                                 | 0,402533983  | 1,793395 |
| Q14534  | Squalene monooxygenase OS=Homo sapiens OX=9606 GN=SQLE PE=1 SV=3                                              | 0,453567032  | 1,788058 |
| Q96P47  | Arf-GAP with GTPase, ANK repeat and PH domain-containing protein 3 OS=Homo sapiens OX=9606 GN=AGAP3 PE=1 SV=2 | 0,459321375  | 1,786624 |
| Q6UWV7  | Lysocardiolipin acyltransferase 1 OS=Homo sapiens OX=9606 GN=LCLAT1 PE=1 SV=1                                 | 0,515158883  | 1,786182 |
| P80723  | Brain acid soluble protein 1 OS=Homo sapiens OX=9606 GN=BASP1 PE=1 SV=2                                       | 0,177676101  | 1,786076 |
| Q8TEA8  | D-aminoacyl-tRNA deacylase 1 OS=Homo sapiens OX=9606 GN=DTD1 PE=1 SV=2                                        | -0,515119718 | 1,786048 |
| Q9UKV8  | Protein argonaute-2 OS=Homo sapiens OX=9606 GN=AGO2 PE=1 SV=3                                                 | -0,340964964 | 1,786048 |
| P00568  | Adenylate kinase isoenzyme 1 OS=Homo sapiens OX=9606 GN=AK1 PE=1 SV=3                                         | 0,184265789  | 1,783539 |
| Q9UJM3  | ERBB receptor feedback inhibitor 1 OS=Homo sapiens OX=9606 GN=ERRFI1 PE=1 SV=1                                | -0,293502598 | 1,782225 |
| P78357  | Contactin-associated protein 1 OS=Homo sapiens OX=9606 GN=CNTNAP1 PE=1 SV=1                                   | -0,438115759 | 1,781453 |
| P51571  | Translocon-associated protein subunit delta OS=Homo sapiens OX=9606 GN=SSRA PE=1 SV=1                         | 0,301434463  | 1,780707 |
| Q9C0E2  | Exportin-4 OS=Homo sapiens OX=9606 GN=XPO4 PE=1 SV=2                                                          | -0,3997117   | 1,779622 |
| Q60673  | DNA polymerase zeta catalytic subunit OS=Homo sapiens OX=9606 GN=REV3L PE=1 SV=2                              | -0,536276514 | 1,777509 |
| Q8IU81  | Interferon regulatory factor 2-binding protein 1 OS=Homo sapiens OX=9606 GN=IRF2BP1 PE=1 SV=1                 | 1,352225192  | 1,776172 |
| Q04837  | Single-stranded DNA-binding protein, mitochondrial OS=Homo sapiens OX=9606 GN=SSBP1 PE=1 SV=1                 | -0,398984124 | 1,77607  |
| Q16643  | Drebrin OS=Homo sapiens OX=9606 GN=DBN1 PE=1 SV=4                                                             | 0,159774843  | 1,767331 |
| Q60701  | UDP-glucose 6-dehydrogenase OS=Homo sapiens OX=9606 GN=UGDH PE=1 SV=1                                         | 0,114444441  | 1,766541 |
| Q15276  | Rab GTPase-binding effector protein 1 OS=Homo sapiens OX=9606 GN=RABEP1 PE=1 SV=2                             | 0,337368366  | 1,764272 |
| Q43491  | Band 4.1-like protein 2 OS=Homo sapiens OX=9606 GN=EPB41L2 PE=1 SV=1                                          | -0,131413369 | 1,764079 |
| O43707  | Alpha-actinin-4 OS=Homo sapiens OX=9606 GN=ACTN4 PE=1 SV=2                                                    | -0,095717267 | 1,763119 |
| Q9UEU0  | Vesicle transport through interaction with t-SNAREs homolog 1B OS=Homo sapiens OX=9606 GN=VT11B PE=1 SV=3     | -0,336593499 | 1,759583 |
| P35813  | Protein phosphatase 1A OS=Homo sapiens OX=9606 GN=PPM1A PE=1 SV=1                                             | 0,298127946  | 1,757418 |
| O95445  | Apolipoprotein M OS=Homo sapiens OX=9606 GN=APOM PE=1 SV=2                                                    | 0,882420695  | 1,75699  |
| P41743  | Protein kinase C iota type OS=Homo sapiens OX=9606 GN=PRKCI PE=1 SV=2                                         | 0,394190837  | 1,752662 |
| Q5TAQ9  | DDB1- and CUL4-associated factor 8 OS=Homo sapiens OX=9606 GN=DCAF8 PE=1 SV=1                                 | -0,505093851 | 1,751856 |
| Q60684  | Importin subunit alpha-7 OS=Homo sapiens OX=9606 GN=KPNA6 PE=1 SV=1                                           | 0,335228397  | 1,751325 |
| P62495  | Eukaryotic peptide chain release factor subunit 1 OS=Homo sapiens OX=9606 GN=ETF1 PE=1 SV=3                   | 0,163543009  | 1,750791 |
| P61604  | 10 kDa heat shock protein, mitochondrial OS=Homo sapiens OX=9606 GN=HSPE1 PE=1 SV=2                           | 0,249151431  | 1,750689 |
| Q9Y312  | Protein AAR2 homolog OS=Homo sapiens OX=9606 GN=AAR2 PE=1 SV=2                                                | 0,87786593   | 1,750557 |
| Q8WUM4  | Programmed cell death 6-interacting protein OS=Homo sapiens OX=9606 GN=PCDC6IP PE=1 SV=1                      | 0,100706295  | 1,750255 |
| P19338  | Nucleolin OS=Homo sapiens OX=9606 GN=NCL PE=1 SV=3                                                            | 0,136197253  | 1,749985 |
| Q6EEV4  | DNA-directed RNA polymerase II subunit GRINL1A, isoforms 4/5 OS=Homo sapiens OX=9606 GN=POLR2M PE=1 SV=1      | 0,877333304  | 1,749804 |
| P40855  | Peroxisomal biogenesis factor 19 OS=Homo sapiens OX=9606 GN=PEX19 PE=1 SV=1                                   | 0,297038464  | 1,749754 |
| Q9NZN4  | EH domain-containing protein 2 OS=Homo sapiens OX=9606 GN=EHD2 PE=1 SV=2                                      | 0,123147146  | 1,745463 |
| Q8IWB9  | Testis-expressed protein 2 OS=Homo sapiens OX=9606 GN=TEX2 PE=1 SV=2                                          | 0,149018425  | 1,743939 |
| Q99653  | Calcineurin B homologous protein 1 OS=Homo sapiens OX=9606 GN=CHP1 PE=1 SV=3                                  | -0,793137248 | 1,742497 |
| O75746  | Calcium-binding mitochondrial carrier protein Aralar1 OS=Homo sapiens OX=9606 GN=SLC25A12 PE=1 SV=2           | -0,295975914 | 1,742284 |
| P07910  | Heterogeneous nuclear ribonucleoproteins C1/C2 OS=Homo sapiens OX=9606 GN=HNRNPC PE=1 SV=4                    | 0,168243999  | 1,741281 |
| Q8WVX9  | Fatty acyl-CoA reductase 1 OS=Homo sapiens OX=9606 GN=FAR1 PE=1 SV=1                                          | -0,870987346 | 1,740797 |
| Q9BSJ2  | Gamma-tubulin complex component 2 OS=Homo sapiens OX=9606 GN=TUBGCP2 PE=1 SV=2                                | -0,268657305 | 1,740501 |
| Q13158  | FAS-associated death domain protein OS=Homo sapiens OX=9606 GN=FADD PE=1 SV=1                                 | -0,39152306  | 1,739628 |
| Q15006  | ER membrane protein complex subunit 2 OS=Homo sapiens OX=9606 GN=EMC2 PE=1 SV=1                               | 0,501173247  | 1,738433 |
| P35637  | RNA-binding protein FUS OS=Homo sapiens OX=9606 GN=FUS PE=1 SV=1                                              | -0,332597231 | 1,735415 |
| Q9Y686  | GTP-binding protein SAR1b OS=Homo sapiens OX=9606 GN=SAR1B PE=1 SV=1                                          | 0,294620327  | 1,73276  |
| P63208  | S-phase kinase-associated protein 1 OS=Homo sapiens OX=9606 GN=SKP1 PE=1 SV=2                                 | 0,196070812  | 1,732687 |
| Q9P289  | Serine/threonine-protein kinase 26 OS=Homo sapiens OX=9606 GN=STK26 PE=1 SV=2                                 | -1,669572998 | 1,732455 |
| Q6UN15  | Pre-mRNA 3'-end-processing factor FIP1 OS=Homo sapiens OX=9606 GN=FIP1L1 PE=1 SV=1                            | 0,389875598  | 1,731577 |
| P19883  | Follistatin OS=Homo sapiens OX=9606 GN=FST PE=1 SV=2                                                          | 0,643250619  | 1,731523 |
| Q96RT1  | Erbin OS=Homo sapiens OX=9606 GN=ERBIN PE=1 SV=2                                                              | -0,162108724 | 1,730958 |
| Q14839  | Chromodomain-helicase-DNA-binding protein 4 OS=Homo sapiens OX=9606 GN=CHD4 PE=1 SV=2                         | -0,216898519 | 1,730069 |
| Q12769  | Nuclear pore complex protein Nup160 OS=Homo sapiens OX=9606 GN=NUP160 PE=1 SV=3                               | -0,246671499 | 1,729192 |
| P26583  | High mobility group protein B2 OS=Homo sapiens OX=9606 GN=HMGB2 PE=1 SV=2                                     | -0,230223817 | 1,728627 |
| Q9Y3D9  | 28S ribosomal protein S23, mitochondrial OS=Homo sapiens OX=9606 GN=MRPS23 PE=1 SV=2                          | -0,862299723 | 1,728389 |
| P52735  | Guanine nucleotide exchange factor VAV2 OS=Homo sapiens OX=9606 GN=VAV2 PE=1 SV=2                             | -0,33129318  | 1,727534 |
| P54819  | Adenylate kinase 2, mitochondrial OS=Homo sapiens OX=9606 GN=AK2 PE=1 SV=2                                    | -0,205318382 | 1,727532 |
| P11532  | Dystrophin OS=Homo sapiens OX=9606 GN=DMD PE=1 SV=3                                                           | 0,185882139  | 1,727162 |

|        |                                                                                                               |              |          |
|--------|---------------------------------------------------------------------------------------------------------------|--------------|----------|
| P16435 | NADPH--cytochrome P450 reductase OS=Homo sapiens OX=9606 GN=POR PE=1 SV=2                                     | 0,187084983  | 1,72651  |
| Q9UPY8 | Microtubule-associated protein RP/EB family member 3 OS=Homo sapiens OX=9606 GN=MAPRE3 PE=1 SV=1              | 0,266469032  | 1,72325  |
| Q9NP84 | Tumor necrosis factor receptor superfamily member 12A OS=Homo sapiens OX=9606 GN=TNFRSF12A PE=1 SV=1          | -0,248999712 | 1,723104 |
| P42126 | Enoyl-CoA delta isomerase 1, mitochondrial OS=Homo sapiens OX=9606 GN=ECI1 PE=1 SV=1                          | -0,245965675 | 1,723084 |
| Q9NP81 | Serine--tRNA ligase, mitochondrial OS=Homo sapiens OX=9606 GN=SARS2 PE=1 SV=1                                 | 0,471863823  | 1,719858 |
| Q14914 | Prostaglandin reductase 1 OS=Homo sapiens OX=9606 GN=PTGR1 PE=1 SV=2                                          | 0,204540859  | 1,719258 |
| Q14011 | Cold-inducible RNA-binding protein OS=Homo sapiens OX=9606 GN=CIRBP PE=1 SV=1                                 | -0,387242648 | 1,718707 |
| Q09666 | Neuroblast differentiation-associated protein AHNAK OS=Homo sapiens OX=9606 GN=AHNAK PE=1 SV=2                | 0,037957508  | 1,717422 |
| P28072 | Proteasome subunit beta type-6 OS=Homo sapiens OX=9606 GN=PSMB6 PE=1 SV=4                                     | -0,292171199 | 1,715574 |
| Q93096 | Protein tyrosine phosphatase type IVA 1 OS=Homo sapiens OX=9606 GN=PTP4A1 PE=1 SV=2                           | 0,227102417  | 1,71545  |
| Q9UQ13 | Leucine-rich repeat protein SHOC-2 OS=Homo sapiens OX=9606 GN=SHOC2 PE=1 SV=2                                 | -0,265433216 | 1,715097 |
| Q93083 | Metallothionein-1L OS=Homo sapiens OX=9606 GN=MT1L PE=2 SV=1                                                  | -0,7167102   | 1,712544 |
| P13473 | Lysosome-associated membrane glycoprotein 2 OS=Homo sapiens OX=9606 GN=LAMP2 PE=1 SV=2                        | 0,328300477  | 1,709459 |
| Q6NUQ4 | Transmembrane protein 214 OS=Homo sapiens OX=9606 GN=TMEM214 PE=1 SV=2                                        | 0,165842109  | 1,709299 |
| O75323 | Protein NipSnap homolog 2 OS=Homo sapiens OX=9606 GN=NIPSNAP2 PE=1 SV=1                                       | 0,847315602  | 1,706774 |
| Q9BRK5 | 45 kDa calcium-binding protein OS=Homo sapiens OX=9606 GN=SDF4 PE=1 SV=1                                      | 0,214518629  | 1,706239 |
| Q12907 | Vesicular integral-membrane protein VIP36 OS=Homo sapiens OX=9606 GN=LMAN2 PE=1 SV=1                          | 0,203229385  | 1,705328 |
| Q03154 | Aminoacylase-1 OS=Homo sapiens OX=9606 GN=ACY1 PE=1 SV=1                                                      | -0,845913279 | 1,704737 |
| Q96AB3 | Ischorismatase domain-containing protein 2 OS=Homo sapiens OX=9606 GN=ISOC2 PE=1 SV=1                         | 0,29030446   | 1,702491 |
| Q86XA9 | HEAT repeat-containing protein 5A OS=Homo sapiens OX=9606 GN=HEATR5A PE=1 SV=2                                | 0,263673346  | 1,70126  |
| Q8NSC1 | Calcium homeostasis modulator protein 5 OS=Homo sapiens OX=9606 GN=CALHM5 PE=2 SV=1                           | 0,383595834  | 1,700875 |
| O14498 | Immunoglobulin superfamily containing leucine-rich repeat protein OS=Homo sapiens OX=9606 GN=ISLR PE=2 SV=1   | 0,840270372  | 1,696515 |
| P62081 | 40S ribosomal protein S7 OS=Homo sapiens OX=9606 GN=RPS7 PE=1 SV=1                                            | 0,226782976  | 1,696468 |
| Q969X1 | Protein lifeguard 3 OS=Homo sapiens OX=9606 GN=TMBIM1 PE=1 SV=2                                               | 0,839172052  | 1,694911 |
| Q9UIA9 | Exportin-7 OS=Homo sapiens OX=9606 GN=XPO7 PE=1 SV=3                                                          | -0,226542266 | 1,694224 |
| P09496 | Clathrin light chain A OS=Homo sapiens OX=9606 GN=CLTA PE=1 SV=1                                              | -0,2890903   | 1,693989 |
| Q9UMX5 | Neudesis OS=Homo sapiens OX=9606 GN=NENF PE=1 SV=1                                                            | -0,382078164 | 1,693453 |
| Q9UHQ9 | NADH-cytochrome b5 reductase 1 OS=Homo sapiens OX=9606 GN=CYB5R1 PE=1 SV=1                                    | 0,213113511  | 1,692221 |
| Q8TDX7 | Serine/threonine-protein kinase Nek7 OS=Homo sapiens OX=9606 GN=NEK7 PE=1 SV=1                                | 0,154490618  | 1,692003 |
| Q00325 | Phosphate carrier protein, mitochondrial OS=Homo sapiens OX=9606 GN=SLC25A3 PE=1 SV=2                         | 0,176842384  | 1,691909 |
| Q9NR31 | GTP-binding protein SAR1a OS=Homo sapiens OX=9606 GN=SAR1A PE=1 SV=1                                          | -0,201957476 | 1,691848 |
| O75531 | Barrier-to-autointegration factor OS=Homo sapiens OX=9606 GN=BANF1 PE=1 SV=1                                  | -0,487328175 | 1,690794 |
| O43598 | 2'-deoxynucleoside 5'-phosphate N-hydrolase 1 OS=Homo sapiens OX=9606 GN=DNHP1 PE=1 SV=1                      | -0,325117718 | 1,690252 |
| Q8NSG2 | Macoilin OS=Homo sapiens OX=9606 GN=MACO1 PE=1 SV=1                                                           | -0,835248637 | 1,689166 |
| Q96124 | Far upstream element-binding protein 3 OS=Homo sapiens OX=9606 GN=FUBP3 PE=1 SV=2                             | -0,192065089 | 1,687819 |
| Q92499 | ATP-dependent RNA helicase DDX1 OS=Homo sapiens OX=9606 GN=DDX1 PE=1 SV=2                                     | -0,105815431 | 1,687473 |
| Q9NZV1 | Cysteine-rich motor neuron 1 protein OS=Homo sapiens OX=9606 GN=CRIM1 PE=1 SV=1                               | 0,261384394  | 1,683296 |
| P05990 | T-complex protein 1 subunit theta OS=Homo sapiens OX=9606 GN=CCT8 PE=1 SV=4                                   | 0,100152096  | 1,682484 |
| P37235 | Hippocalin-like protein 1 OS=Homo sapiens OX=9606 GN=HPCAL1 PE=1 SV=3                                         | -0,261156828 | 1,681512 |
| Q68DQ2 | Very large A-kinase anchor protein OS=Homo sapiens OX=9606 GN=CRYBG3 PE=1 SV=3                                | 0,095765361  | 1,681502 |
| P30048 | Thioredoxin-dependent peroxide reductase, mitochondrial OS=Homo sapiens OX=9606 GN=PRDX3 PE=1 SV=3            | 0,241029824  | 1,680508 |
| Q9UNE7 | E3 ubiquitin-protein ligase CHIP OS=Homo sapiens OX=9606 GN=STUB1 PE=1 SV=2                                   | 0,200684802  | 1,67839  |
| O15144 | Actin-related protein 2/3 complex subunit 2 OS=Homo sapiens OX=9606 GN=ARPC2 PE=1 SV=1                        | 0,129051453  | 1,677225 |
| Q8NBF2 | NHL repeat-containing protein 2 OS=Homo sapiens OX=9606 GN=NHLRC2 PE=1 SV=1                                   | 0,260558486  | 1,676823 |
| P31327 | Carbamoyl-phosphate synthase [ammonia], mitochondrial OS=Homo sapiens OX=9606 GN=CPS1 PE=1 SV=2               | 0,825986698  | 1,675527 |
| Q9BU18 | Programmed cell death protein 10 OS=Homo sapiens OX=9606 GN=PDCD10 PE=1 SV=1                                  | -0,224476309 | 1,674993 |
| P25445 | Tumor necrosis factor receptor superfamily member 6 OS=Homo sapiens OX=9606 GN=FAS PE=1 SV=1                  | 0,286191688  | 1,673751 |
| O60220 | Mitochondrial import inner membrane translocase subunit Tim8 A OS=Homo sapiens OX=9606 GN=TIMM8A PE=1 SV=1    | 0,824646849  | 1,673545 |
| P18085 | ADP-ribosylation factor 4 OS=Homo sapiens OX=9606 GN=ARF4 PE=1 SV=3                                           | 0,224247765  | 1,672868 |
| P78346 | Ribonuclease P protein subunit p30 OS=Homo sapiens OX=9606 GN=RPP30 PE=1 SV=1                                 | -0,481964669 | 1,672243 |
| P53582 | Methionine aminopeptidase 1 OS=Homo sapiens OX=9606 GN=METAP1 PE=1 SV=2                                       | 0,224179622  | 1,672235 |
| Q9H857 | 5'-nucleotidase domain-containing protein 2 OS=Homo sapiens OX=9606 GN=NT5DC2 PE=1 SV=1                       | -0,481528344 | 1,670731 |
| Q9Y3C4 | EKC/KEOPS complex subunit TPRKB OS=Homo sapiens OX=9606 GN=TPRKB PE=1 SV=1                                    | -0,481505848 | 1,670653 |
| Q71U36 | Tubulin alpha-1A chain OS=Homo sapiens OX=9606 GN=TUBA1A PE=1 SV=1                                            | 0,105004707  | 1,670524 |
| P52789 | Hexokinase 2 OS=Homo sapiens OX=9606 GN=HK2 PE=1 SV=2                                                         | 0,157676519  | 1,670136 |
| P00492 | Hypoxanthine-guanine phosphoribosyltransferase OS=Homo sapiens OX=9606 GN=HPR1 PE=1 SV=2                      | -0,223826542 | 1,668955 |
| Q02880 | DNA topoisomerase 2-beta OS=Homo sapiens OX=9606 GN=TOP2B PE=1 SV=3                                           | 0,376968295  | 1,668454 |
| P22830 | Ferrochelatase, mitochondrial OS=Homo sapiens OX=9606 GN=FECH PE=1 SV=2                                       | -0,48083907  | 1,668343 |
| Q81WA4 | #N/D                                                                                                          | -0,166552329 | 1,668224 |
| Q9NQ84 | Omega-amidase NIT2 OS=Homo sapiens OX=9606 GN=NIT2 PE=1 SV=1                                                  | -0,199606259 | 1,667008 |
| P31025 | Lipocalin-1 OS=Homo sapiens OX=9606 GN=LCN1 PE=1 SV=1                                                         | -0,819641544 | 1,666121 |
| O95166 | Gamma-aminobutyric acid receptor-associated protein OS=Homo sapiens OX=9606 GN=GABARAP PE=1 SV=1              | 1,773200424  | 1,665006 |
| Q8WUX9 | Charged multivesicular body protein 7 OS=Homo sapiens OX=9606 GN=CHMP7 PE=1 SV=1                              | 0,375930663  | 1,663377 |
| O15460 | Prolyl 4-hydroxylase subunit alpha-2 OS=Homo sapiens OX=9606 GN=P4HA2 PE=1 SV=1                               | -0,125566973 | 1,662204 |
| P62304 | Small nuclear ribonucleoprotein E OS=Homo sapiens OX=9606 GN=SNRPE PE=1 SV=1                                  | -0,478557871 | 1,660431 |
| Q8TCT8 | Signal peptide peptidase-like 2A OS=Homo sapiens OX=9606 GN=SPPL2A PE=1 SV=2                                  | -0,815419941 | 1,659835 |
| Q05655 | Protein kinase C delta type OS=Homo sapiens OX=9606 GN=PRKCD PE=1 SV=2                                        | -0,930149636 | 1,659049 |
| O43324 | Eukaryotic translation elongation factor 1 epsilon-1 OS=Homo sapiens OX=9606 GN=EEF1E1 PE=1 SV=1              | -0,319869741 | 1,658623 |
| P35754 | Glutaredoxin-1 OS=Homo sapiens OX=9606 GN=GLRX PE=1 SV=2                                                      | -0,283740972 | 1,656611 |
| A6NDU8 | UPF0600 protein C5orf51 OS=Homo sapiens OX=9606 GN=C5orf51 PE=1 SV=1                                          | 0,534230627  | 1,655638 |
| P61018 | Ras-related protein Rab-4B OS=Homo sapiens OX=9606 GN=RAB4B PE=1 SV=1                                         | 0,575164933  | 1,653881 |
| P46976 | Glycogenin-1 OS=Homo sapiens OX=9606 GN=GYG1 PE=1 SV=4                                                        | 0,373710407  | 1,652511 |
| Q14315 | Filamin-C OS=Homo sapiens OX=9606 GN=FLNC PE=1 SV=3                                                           | 0,06733266   | 1,651524 |
| P68400 | Casein kinase II subunit alpha OS=Homo sapiens OX=9606 GN=CSNK2A1 PE=1 SV=1                                   | -0,237612596 | 1,651173 |
| Q14554 | Protein disulfide-isomerase A5 OS=Homo sapiens OX=9606 GN=PDIA5 PE=1 SV=1                                     | -0,167069303 | 1,650225 |
| O14735 | CDP-diacylglycerol--inositol 3-phosphatidyltransferase OS=Homo sapiens OX=9606 GN=CDIPT PE=1 SV=1             | 0,808353257  | 1,64926  |
| Q96A35 | 39S ribosomal protein L24, mitochondrial OS=Homo sapiens OX=9606 GN=MRPL24 PE=1 SV=1                          | -0,475244376 | 1,648924 |
| O60271 | C-Jun-amino-terminal kinase-interacting protein 4 OS=Homo sapiens OX=9606 GN=SPAG9 PE=1 SV=4                  | 0,108583832  | 1,648693 |
| Q96T76 | MMS19 nucleotide excision repair protein homolog OS=Homo sapiens OX=9606 GN=MMS19 PE=1 SV=2                   | 0,1884976    | 1,648148 |
| Q92879 | CUGBP Elav-like family member 1 OS=Homo sapiens OX=9606 GN=CELF1 PE=1 SV=2                                    | 0,256880227  | 1,648056 |
| Q92544 | Transmembrane 9 superfamily member 4 OS=Homo sapiens OX=9606 GN=TM9SF4 PE=1 SV=2                              | 0,237226289  | 1,647864 |
| Q9H2P9 | Diphthine methyl ester synthase OS=Homo sapiens OX=9606 GN=DPH5 PE=1 SV=2                                     | -0,663675541 | 1,646154 |
| O75521 | Enoyl-CoA delta isomerase 2, mitochondrial OS=Homo sapiens OX=9606 GN=ECI2 PE=1 SV=4                          | 0,282190449  | 1,645801 |
| P13693 | Translationally-controlled tumor protein OS=Homo sapiens OX=9606 GN=TPST1 PE=1 SV=1                           | 0,180034555  | 1,643998 |
| O75027 | ATP-binding cassette sub-family B member 7, mitochondrial OS=Homo sapiens OX=9606 GN=ABC7 PE=1 SV=2           | 0,684147788  | 1,642737 |
| O43493 | Trans-Golgi network integral membrane protein 2 OS=Homo sapiens OX=9606 GN=TGOLN2 PE=1 SV=3                   | 0,236519395  | 1,641813 |
| Q9BT78 | COP9 signalosome complex subunit 4 OS=Homo sapiens OX=9606 GN=COPS4 PE=1 SV=1                                 | 0,14664182   | 1,6416   |
| Q9UDY8 | Mucosa-associated lymphoid tissue lymphoma translocation protein 1 OS=Homo sapiens OX=9606 GN=MALT1 PE=1 SV=1 | 0,316654113  | 1,63927  |
| Q63HK5 | Teshirt homolog 3 OS=Homo sapiens OX=9606 GN=TSZH3 PE=1 SV=2                                                  | 1,452053278  | 1,63829  |
| P07355 | Annexin A2 OS=Homo sapiens OX=9606 GN=ANXA2 PE=1 SV=2                                                         | -0,115254141 | 1,637802 |
| O94832 | Unconventional myosin-Id OS=Homo sapiens OX=9606 GN=MYO1D PE=1 SV=2                                           | -0,608727483 | 1,636428 |
| Q9H7C9 | Mth938 domain-containing protein OS=Homo sapiens OX=9606 GN=AAMD PE=1 SV=1                                    | -0,370419292 | 1,636402 |
| P63096 | Guanine nucleotide-binding protein (G) subunit alpha-1 OS=Homo sapiens OX=9606 GN=GNAI1 PE=1 SV=2             | 0,798997917  | 1,635161 |
| Q9UQ80 | Proliferation-associated protein 2G4 OS=Homo sapiens OX=9606 GN=PA2G4 PE=1 SV=3                               | 0,135303655  | 1,634962 |
| P35249 | Replication factor C subunit 4 OS=Homo sapiens OX=9606 GN=RFC4 PE=1 SV=2                                      | 0,771607431  | 1,634752 |
| Q9NRR5 | Ubiquilin-4 OS=Homo sapiens OX=9606 GN=UBQLN4 PE=1 SV=2                                                       | 0,79868481   | 1,634687 |
| P04075 | Fructose-bisphosphate aldolase A OS=Homo sapiens OX=9606 GN=ALDOA PE=1 SV=2                                   | 0,115000055  | 1,633097 |
| Q15796 | Mothers against decapentaplegic homolog 2 OS=Homo sapiens OX=9606 GN=SMAD2 PE=1 SV=1                          | 0,797528263  | 1,632936 |

|        |                                                                                                                      |              |          |
|--------|----------------------------------------------------------------------------------------------------------------------|--------------|----------|
| Q93008 | Probable ubiquitin carboxyl-terminal hydrolase FAF-X OS=Homo sapiens OX=9606 GN=USP9X PE=1 SV=3                      | -0,099103176 | 1,632047 |
| Q07955 | Serine/arginine-rich splicing factor 1 OS=Homo sapiens OX=9606 GN=SRSF1 PE=1 SV=2                                    | 0,196274441  | 1,631985 |
| P20962 | Parathyroid hormone-related protein OS=Homo sapiens OX=9606 GN=PTHrP PE=1 SV=2                                       | -0,470358546 | 1,631919 |
| P17655 | Calpain-2 catalytic subunit OS=Homo sapiens OX=9606 GN=CAPN2 PE=1 SV=6                                               | 0,116958481  | 1,631642 |
| P14209 | CD99 antigen OS=Homo sapiens OX=9606 GN=CD99 PE=1 SV=1                                                               | 0,369377558  | 1,631303 |
| O14684 | Prostaglandin H synthase OS=Homo sapiens OX=9606 GN=PTGES PE=1 SV=2                                                  | 0,280061599  | 1,630977 |
| O14979 | Heterogeneous nuclear ribonucleoprotein D-like OS=Homo sapiens OX=9606 GN=HNRNPDL PE=1 SV=3                          | -0,21964564  | 1,630239 |
| O43264 | Centromere/kinetochore protein zw10 homolog OS=Homo sapiens OX=9606 GN=ZW10 PE=1 SV=3                                | 0,219595482  | 1,629776 |
| P10619 | Lysosomal protective protein OS=Homo sapiens OX=9606 GN=CTSA PE=1 SV=2                                               | -0,219341505 | 1,627431 |
| P61160 | Actin-related protein 2 OS=Homo sapiens OX=9606 GN=ACTR2 PE=1 SV=1                                                   | 0,154281288  | 1,624022 |
| P04183 | Thymidine kinase, cytosolic OS=Homo sapiens OX=9606 GN=TK1 PE=1 SV=2                                                 | 0,467919539  | 1,623414 |
| P19022 | Cadherin-2 OS=Homo sapiens OX=9606 GN=CDH2 PE=1 SV=4                                                                 | -0,195283017 | 1,621603 |
| Q9BQE4 | Selenoprotein S OS=Homo sapiens OX=9606 GN=SELENOS PE=1 SV=3                                                         | -0,467393539 | 1,621579 |
| P30504 | HLA class I histocompatibility antigen, Cw-4 alpha chain OS=Homo sapiens OX=9606 GN=HLA-C PE=1 SV=1                  | 0,789333     | 1,620475 |
| P24928 | DNA-directed RNA polymerase II subunit RPB1 OS=Homo sapiens OX=9606 GN=POLR2A PE=1 SV=2                              | -0,467004779 | 1,620222 |
| Q92896 | Golgi apparatus protein 1 OS=Homo sapiens OX=9606 GN=GLG1 PE=1 SV=2                                                  | 0,105539346  | 1,619872 |
| P30405 | Peptidyl-prolyl cis-trans isomerase F, mitochondrial OS=Homo sapiens OX=9606 GN=PPIF PE=1 SV=1                       | -0,277941599 | 1,616235 |
| Q9H2U1 | ATP-dependent DNA/RNA helicase DHX36 OS=Homo sapiens OX=9606 GN=DHX36 PE=1 SV=2                                      | 0,31264149   | 1,615149 |
| Q96EE3 | Nucleoporin SEH1 OS=Homo sapiens OX=9606 GN=SEH1 PE=1 SV=3                                                           | -0,277725884 | 1,614736 |
| P19838 | Nuclear factor NF-kappa-B p105 subunit OS=Homo sapiens OX=9606 GN=NFKB1 PE=1 SV=2                                    | 0,252524672  | 1,614119 |
| P00533 | Epidermal growth factor receptor OS=Homo sapiens OX=9606 GN=EGFR PE=1 SV=2                                           | 0,204974132  | 1,611553 |
| P0DP25 | Calmodulin-3 OS=Homo sapiens OX=9606 GN=CALM3 PE=1 SV=1                                                              | -0,177230903 | 1,611524 |
| O75306 | NADH dehydrogenase [ubiquinone] iron-sulfur protein 2, mitochondrial OS=Homo sapiens OX=9606 GN=NDUFS2 PE=1 SV=2     | -0,311626551 | 1,609053 |
| Q9BW72 | HIG1 domain family member 2A, mitochondrial OS=Homo sapiens OX=9606 GN=HIGD2A PE=1 SV=1                              | -0,463623902 | 1,60841  |
| Q13547 | Histone deacetylase 1 OS=Homo sapiens OX=9606 GN=HDAC1 PE=1 SV=1                                                     | 0,276712103  | 1,607696 |
| P26641 | Elongation factor 1-gamma OS=Homo sapiens OX=9606 GN=EEF1G PE=1 SV=3                                                 | 0,122345018  | 1,606937 |
| Q8N1F8 | Serine/threonine-protein kinase 11-interacting protein OS=Homo sapiens OX=9606 GN=STK11IP PE=1 SV=4                  | 0,136279173  | 1,602801 |
| Q8IV38 | Ankyrin repeat and MYND domain-containing protein 2 OS=Homo sapiens OX=9606 GN=ANKMY2 PE=1 SV=1                      | -0,530145529 | 1,602487 |
| Q15813 | Tubulin-specific chaperone E OS=Homo sapiens OX=9606 GN=TBCE PE=1 SV=1                                               | -0,250963426 | 1,601989 |
| Q9H9J2 | 39S ribosomal protein L44, mitochondrial OS=Homo sapiens OX=9606 GN=MRPL44 PE=1 SV=1                                 | -0,36335829  | 1,601834 |
| P02795 | Metallothionein-2 OS=Homo sapiens OX=9606 GN=MT2A PE=1 SV=1                                                          | 0,461595419  | 1,601314 |
| Q15738 | Sterol-4-alpha-carboxylate 3-dehydrogenase, decarboxylating OS=Homo sapiens OX=9606 GN=NSDHL PE=1 SV=2               | 0,193212358  | 1,599998 |
| P14174 | Macrophage migration inhibitory factor OS=Homo sapiens OX=9606 GN=MIF PE=1 SV=4                                      | -0,775805091 | 1,59971  |
| Q5QJ74 | Tubulin-specific chaperone cofactor E-like protein OS=Homo sapiens OX=9606 GN=TBCEL PE=1 SV=2                        | 1,151095546  | 1,599404 |
| P50502 | Hsc70-interacting protein OS=Homo sapiens OX=9606 GN=ST13 PE=1 SV=2                                                  | -0,193023602 | 1,598013 |
| Q8IVD9 | NudC domain-containing protein 3 OS=Homo sapiens OX=9606 GN=NUDC3 PE=1 SV=3                                          | 0,250438879  | 1,597917 |
| Q14767 | Latent-transforming growth factor beta-binding protein 2 OS=Homo sapiens OX=9606 GN=LTBP2 PE=1 SV=3                  | 0,124102851  | 1,594165 |
| Q9XUJ9 | N-alpha-acetyltransferase 15, NATA auxiliary subunit OS=Homo sapiens OX=9606 GN=NAA15 PE=1 SV=1                      | 0,147502238  | 1,594049 |
| Q6VEQ5 | WAS protein family homolog 2 OS=Homo sapiens OX=9606 GN=WASH2P PE=2 SV=2                                             | 0,361669912  | 1,593567 |
| P42704 | Leucine-rich PPR motif-containing protein, mitochondrial OS=Homo sapiens OX=9606 GN=LRPPRC PE=1 SV=3                 | -0,094890414 | 1,593204 |
| Q96A65 | Exocyst complex component 4 OS=Homo sapiens OX=9606 GN=EXOC4 PE=1 SV=1                                               | -0,20308065  | 1,59294  |
| Q6IB50 | Twinfilin-2 OS=Homo sapiens OX=9606 GN=TFW2 PE=1 SV=2                                                                | -0,20305289  | 1,592668 |
| Q15648 | Mediator of RNA polymerase II transcription subunit 1 OS=Homo sapiens OX=9606 GN=MED1 PE=1 SV=4                      | -0,771193239 | 1,592575 |
| Q9Y3D6 | Mitochondrial fission 1 protein OS=Homo sapiens OX=9606 GN=MF1 PE=1 SV=2                                             | 0,249603482  | 1,591438 |
| Q16774 | Guanylate kinase OS=Homo sapiens OX=9606 GN=GUK1 PE=1 SV=2                                                           | -0,274111203 | 1,589655 |
| Q9Y5H0 | Protocadherin gamma-A3 OS=Homo sapiens OX=9606 GN=PCHGA3 PE=2 SV=2                                                   | 1,124404459  | 1,58901  |
| P04424 | Argininosuccinate lyase OS=Homo sapiens OX=9606 GN=ASL PE=1 SV=4                                                     | 0,215142334  | 1,588791 |
| O55394 | Phosphoacetylglucosamine mutase OS=Homo sapiens OX=9606 GN=PGM3 PE=1 SV=1                                            | 0,135582739  | 1,58833  |
| P01130 | Low-density lipoprotein receptor OS=Homo sapiens OX=9606 GN=LDLR PE=1 SV=1                                           | -0,457841458 | 1,588162 |
| Q13425 | Beta-2-syntrophin OS=Homo sapiens OX=9606 GN=SNB2 PE=1 SV=1                                                          | 0,214712818  | 1,584852 |
| Q9H270 | Vacuolar protein sorting-associated protein 11 homolog OS=Homo sapiens OX=9606 GN=VPS11 PE=1 SV=1                    | 0,307482906  | 1,584191 |
| Q9Y5V3 | Melanoma-associated antigen D1 OS=Homo sapiens OX=9606 GN=MAGED1 PE=1 SV=3                                           | 0,273227305  | 1,583531 |
| Q96AG4 | Leucine-rich repeat-containing protein 59 OS=Homo sapiens OX=9606 GN=LRRC59 PE=1 SV=1                                | 0,167857993  | 1,583012 |
| Q9BU61 | NADH dehydrogenase [ubiquinone] 1 alpha subcomplex assembly factor 3 OS=Homo sapiens OX=9606 GN=NDUFAF3 PE=1 SV=1    | 0,818407316  | 1,582004 |
| P24666 | Low molecular weight phosphotyrosine protein phosphatase OS=Homo sapiens OX=9606 GN=ACP1 PE=1 SV=3                   | -0,272898859 | 1,581256 |
| Q13488 | V-type proton ATPase 116 kDa subunit a isoform 3 OS=Homo sapiens OX=9606 GN=TCIRG1 PE=1 SV=3                         | 0,247866659  | 1,577982 |
| P43235 | Cathepsin K OS=Homo sapiens OX=9606 GN=CTSK PE=1 SV=1                                                                | -0,737743783 | 1,577517 |
| P15559 | NAD(P)H dehydrogenase [quinone] 1 OS=Homo sapiens OX=9606 GN=NQO1 PE=1 SV=1                                          | -0,16730685  | 1,576405 |
| Q13438 | Protein OS-9 OS=Homo sapiens OX=9606 GN=OS9 PE=1 SV=1                                                                | 0,454065679  | 1,57491  |
| P21333 | Filamin-A OS=Homo sapiens OX=9606 GN=FLNA PE=1 SV=4                                                                  | -0,051450481 | 1,574567 |
| O00571 | ATP-dependent RNA helicase DDX3X OS=Homo sapiens OX=9606 GN=DDX3X PE=1 SV=3                                          | 0,106391769  | 1,573533 |
| Q92797 | Symplekin OS=Homo sapiens OX=9606 GN=SYMPK PE=1 SV=2                                                                 | 0,758853552  | 1,573341 |
| Q14498 | RNA-binding protein 39 OS=Homo sapiens OX=9606 GN=RBM39 PE=1 SV=2                                                    | 0,16694802   | 1,572107 |
| O60879 | Protein diaphanous homolog 2 OS=Homo sapiens OX=9606 GN=DIAPH2 PE=1 SV=1                                             | -0,757970878 | 1,571957 |
| Q96TA2 | ATP-dependent zinc metalloprotease YME1L1 OS=Homo sapiens OX=9606 GN=YME1L1 PE=1 SV=2                                | -0,453029467 | 1,571269 |
| P83731 | 60S ribosomal protein L24 OS=Homo sapiens OX=9606 GN=RPL24 PE=1 SV=1                                                 | 0,304971938  | 1,569144 |
| Q15018 | BRISX complex subunit Abraxas 2 OS=Homo sapiens OX=9606 GN=ABRAXAS2 PE=1 SV=2                                        | -0,756177316 | 1,569141 |
| P01040 | Cystatin-A OS=Homo sapiens OX=9606 GN=CSTA PE=1 SV=1                                                                 | -0,452044784 | 1,567807 |
| Q96P70 | Importin-9 OS=Homo sapiens OX=9606 GN=IPO9 PE=1 SV=3                                                                 | -0,18117268  | 1,567556 |
| P49790 | Nuclear pore complex protein Nup153 OS=Homo sapiens OX=9606 GN=NUP153 PE=1 SV=2                                      | 0,356217646  | 1,566871 |
| Q92522 | Histone H1x OS=Homo sapiens OX=9606 GN=H1FX PE=1 SV=1                                                                | -0,451600933 | 1,566246 |
| O60936 | Nucleolar protein 3 OS=Homo sapiens OX=9606 GN=NOL3 PE=1 SV=2                                                        | -0,356058781 | 1,566093 |
| Q9BYX7 | Putative beta-actin-like protein 3 OS=Homo sapiens OX=9606 GN=POTEKP PE=5 SV=1                                       | -0,355825632 | 1,564951 |
| Q13098 | COP9 signalosome complex subunit 1 OS=Homo sapiens OX=9606 GN=GPS1 PE=1 SV=4                                         | 0,180930406  | 1,56491  |
| Q13573 | SNW domain-containing protein 1 OS=Homo sapiens OX=9606 GN=SNW1 PE=1 SV=1                                            | 0,355744024  | 1,564552 |
| Q9BTM9 | Ubiquitin-related modifier 1 OS=Homo sapiens OX=9606 GN=URM1 PE=1 SV=1                                               | -0,752421715 | 1,563232 |
| O60832 | H/ACA ribonucleoprotein complex subunit DKC1 OS=Homo sapiens OX=9606 GN=DKC1 PE=1 SV=3                               | 0,212177724  | 1,561648 |
| Q96B36 | Proline-rich AKT1 substrate 1 OS=Homo sapiens OX=9606 GN=AKT1S1 PE=1 SV=1                                            | -0,450221549 | 1,561393 |
| P47712 | Cytosolic phospholipase A2 OS=Homo sapiens OX=9606 GN=PLA2G4A PE=1 SV=2                                              | 0,245700567  | 1,561235 |
| P51532 | Transcription activator BRG1 OS=Homo sapiens OX=9606 GN=SMARCA4 PE=1 SV=2                                            | 0,450143579  | 1,561118 |
| P30050 | 60S ribosomal protein L12 OS=Homo sapiens OX=9606 GN=RPL12 PE=1 SV=1                                                 | 0,245674615  | 1,561035 |
| Q9H6U6 | Breast carcinoma-amplified sequence 3 OS=Homo sapiens OX=9606 GN=BCAS3 PE=1 SV=3                                     | 0,606951515  | 1,560747 |
| O00233 | 26S proteasome non-ATPase regulatory subunit 9 OS=Homo sapiens OX=9606 GN=PSMD9 PE=1 SV=3                            | -0,269908174 | 1,560571 |
| Q9H425 | Uncharacterized protein C1orf198 OS=Homo sapiens OX=9606 GN=C1orf198 PE=1 SV=1                                       | -0,18052176  | 1,560451 |
| P07195 | L-lactate dehydrogenase B chain OS=Homo sapiens OX=9606 GN=LDHB PE=1 SV=2                                            | 0,137049976  | 1,5581   |
| O75335 | Liprin-alpha-4 OS=Homo sapiens OX=9606 GN=PPP1A4 PE=2 SV=3                                                           | -0,130384942 | 1,557072 |
| Q14938 | Nuclear factor 1 X-type OS=Homo sapiens OX=9606 GN=NFIX PE=1 SV=2                                                    | 0,825382531  | 1,556641 |
| Q8IWE2 | Protein NOXP20 OS=Homo sapiens OX=9606 GN=FAM114A1 PE=1 SV=2                                                         | 0,144791635  | 1,556572 |
| E9PAV3 | Nascent polypeptide-associated complex subunit alpha, muscle-specific form OS=Homo sapiens OX=9606 GN=NACA PE=1 SV=1 | -0,268693892 | 1,552185 |
| P55263 | Adenosine kinase OS=Homo sapiens OX=9606 GN=ADK PE=1 SV=2                                                            | -0,172054224 | 1,552074 |
| P82979 | SAP domain-containing ribonucleoprotein OS=Homo sapiens OX=9606 GN=SARNP PE=1 SV=3                                   | -0,302062054 | 1,551725 |
| Q9UBQ5 | Eukaryotic translation initiation factor 3 subunit K OS=Homo sapiens OX=9606 GN=EIF3K PE=1 SV=1                      | 0,225910185  | 1,551615 |
| P10644 | cAMP-dependent protein kinase type I-alpha regulatory subunit OS=Homo sapiens OX=9606 GN=PRKAR1A PE=1 SV=1           | 0,153774574  | 1,551605 |
| Q8N684 | Cleavage and polyadenylation specificity factor subunit 7 OS=Homo sapiens OX=9606 GN=PCSF7 PE=1 SV=1                 | -0,352990543 | 1,55107  |
| Q9UL46 | Proteasome activator complex subunit 2 OS=Homo sapiens OX=9606 GN=PSME2 PE=1 SV=4                                    | 0,153643615  | 1,549822 |
| Q6P1N0 | Coiled-coil and C2 domain-containing protein 1A OS=Homo sapiens OX=9606 GN=CC2D1A PE=1 SV=1                          | -0,30141562  | 1,547858 |
| P60510 | Serine/threonine-protein phosphatase 4 catalytic subunit OS=Homo sapiens OX=9606 GN=PP4C PE=1 SV=1                   | 0,301233729  | 1,54677  |
| Q16629 | Serine/arginine-rich splicing factor 7 OS=Homo sapiens OX=9606 GN=SRSF7 PE=1 SV=1                                    | 0,225268981  | 1,546201 |

|        |                                                                                                                                  |              |          |
|--------|----------------------------------------------------------------------------------------------------------------------------------|--------------|----------|
| P07203 | Glutathione peroxidase 1 OS=Homo sapiens OX=9606 GN=GPX1 PE=1 SV=4                                                               | -0,210291069 | 1,544443 |
| O75828 | Carbonyl reductase [NADPH] 3 OS=Homo sapiens OX=9606 GN=CBR3 PE=1 SV=3                                                           | 0,179039808  | 1,54431  |
| O15484 | Calpain-5 OS=Homo sapiens OX=9606 GN=CAPN5 PE=1 SV=2                                                                             | -0,445088631 | 1,543306 |
| Q9Y5B9 | FACT complex subunit SPT16 OS=Homo sapiens OX=9606 GN=SPT16H PE=1 SV=1                                                           | 0,171284268  | 1,543289 |
| Q13185 | Chromobox protein homolog 3 OS=Homo sapiens OX=9606 GN=CBX3 PE=1 SV=4                                                            | -0,243327215 | 1,542927 |
| Q9UBT2 | SUMO-activating enzyme subunit 2 OS=Homo sapiens OX=9606 GN=UBA2 PE=1 SV=2                                                       | 0,187646509  | 1,542262 |
| Q4ZHG4 | Fibronectin type III domain-containing protein 1 OS=Homo sapiens OX=9606 GN=FNDC1 PE=2 SV=4                                      | -0,351176303 | 1,542187 |
| P17096 | High mobility group protein HMG-I/HMG-Y OS=Homo sapiens OX=9606 GN=HMGA1 PE=1 SV=3                                               | 0,300412594  | 1,54186  |
| O15305 | Phosphomannomutase 2 OS=Homo sapiens OX=9606 GN=PMM2 PE=1 SV=1                                                                   | -0,18749636  | 1,540714 |
| P52435 | DNA-directed RNA polymerase II subunit RPB11-a OS=Homo sapiens OX=9606 GN=POLR2J PE=1 SV=1                                       | -0,737817247 | 1,540065 |
| P04066 | Tissue alpha-L-fucosidase OS=Homo sapiens OX=9606 GN=FUCA1 PE=1 SV=4                                                             | -0,670978328 | 1,539372 |
| Q8TAE8 | Growth arrest and DNA damage-inducible proteins-interacting protein 1 OS=Homo sapiens OX=9606 GN=GADD45G1P1 PE=1 SV=1            | -0,737098952 | 1,538917 |
| P15880 | 40S ribosomal protein S2 OS=Homo sapiens OX=9606 GN=RPS2 PE=1 SV=2                                                               | -0,158072333 | 1,537766 |
| Q00526 | Cyclin-dependent kinase 3 OS=Homo sapiens OX=9606 GN=CDK3 PE=1 SV=1                                                              | -0,823010919 | 1,537208 |
| O76071 | Probable cytosolic iron-sulfur protein assembly protein CIAO1 OS=Homo sapiens OX=9606 GN=CIAO1 PE=1 SV=1                         | 0,442780002  | 1,535156 |
| Q9NX63 | MICOS complex subunit MIC19 OS=Homo sapiens OX=9606 GN=CHCHD3 PE=1 SV=1                                                          | 0,266160672  | 1,534714 |
| P21589 | 5'-nucleotidase OS=Homo sapiens OX=9606 GN=NTSE PE=1 SV=1                                                                        | -0,128804086 | 1,534329 |
| Q9Y486 | DBP1- and CUL4-associated factor 1 OS=Homo sapiens OX=9606 GN=DCAF1 PE=1 SV=3                                                    | -0,217675085 | 1,532667 |
| Q7KYR7 | Butyrophilin subfamily 2 member A1 OS=Homo sapiens OX=9606 GN=BTN2A1 PE=1 SV=3                                                   | 0,733140456  | 1,532582 |
| Q9UJ68 | Mitochondrial peptide methionine sulfoxide reductase OS=Homo sapiens OX=9606 GN=MSRA PE=1 SV=1                                   | -0,441143662 | 1,529375 |
| P12956 | X-ray repair cross-complementing protein 6 OS=Homo sapiens OX=9606 GN=XRCC6 PE=1 SV=2                                            | 0,115402775  | 1,528294 |
| P50148 | Guanine nucleotide-binding protein G(q) subunit alpha OS=Homo sapiens OX=9606 GN=GNAQ PE=1 SV=4                                  | 0,177463802  | 1,527199 |
| O95163 | Elongator complex protein 1 OS=Homo sapiens OX=9606 GN=ELP1 PE=1 SV=3                                                            | 0,163162907  | 1,526994 |
| Q06830 | Peroxioredoxin-1 OS=Homo sapiens OX=9606 GN=PRDX1 PE=1 SV=1                                                                      | 0,157061184  | 1,525165 |
| Q86U00 | B-cell CLL/lymphoma 9-like protein OS=Homo sapiens OX=9606 GN=BCL9L PE=1 SV=1                                                    | 0,698109617  | 1,523882 |
| Q8Y31  | Intraflagellar transport protein 20 homolog OS=Homo sapiens OX=9606 GN=IFT20 PE=1 SV=1                                           | -0,439229372 | 1,522606 |
| Q00577 | Transcriptional activator protein Pur-alpha OS=Homo sapiens OX=9606 GN=PURA PE=1 SV=2                                            | -0,264361598 | 1,522327 |
| P51610 | Host cell factor 1 OS=Homo sapiens OX=9606 GN=HCFC1 PE=1 SV=2                                                                    | -0,207809013 | 1,521876 |
| P37837 | Transaldolase OS=Homo sapiens OX=9606 GN=TALDO1 PE=1 SV=2                                                                        | -0,138250016 | 1,521864 |
| P53992 | Protein transport protein Sec24C OS=Homo sapiens OX=9606 GN=SEC24C PE=1 SV=3                                                     | 0,127868957  | 1,520288 |
| Q92979 | Ribosomal RNA small subunit methyltransferase NEP1 OS=Homo sapiens OX=9606 GN=EMG1 PE=1 SV=4                                     | -0,346379786 | 1,518704 |
| Q9BSJ8 | Extended synaptotagmin-1 OS=Homo sapiens OX=9606 GN=ESYT1 PE=1 SV=1                                                              | 0,101911159  | 1,518127 |
| Q99848 | Probable rRNA-processing protein EBP2 OS=Homo sapiens OX=9606 GN=EBNA1BP2 PE=1 SV=2                                              | 0,72399639   | 1,517862 |
| Q6PCE3 | Glucose 1,6-bisphosphate synthase OS=Homo sapiens OX=9606 GN=PGM2L1 PE=1 SV=3                                                    | 0,296189922  | 1,516638 |
| Q04760 | Lactoylglutathione lyase OS=Homo sapiens OX=9606 GN=GLO1 PE=1 SV=4                                                               | -0,1851548   | 1,516617 |
| Q9Y570 | Protein phosphatase methyltransferase 1 OS=Homo sapiens OX=9606 GN=PPME1 PE=1 SV=3                                               | 0,16879003   | 1,514933 |
| P42677 | 40S ribosomal protein S27 OS=Homo sapiens OX=9606 GN=RPS27 PE=1 SV=3                                                             | 0,292625823  | 1,513646 |
| P31749 | RAC-alpha serine/threonine-protein kinase OS=Homo sapiens OX=9606 GN=AKT1 PE=1 SV=2                                              | -0,345049262 | 1,512191 |
| P50991 | T-complex protein 1 subunit delta OS=Homo sapiens OX=9606 GN=CCT4 PE=1 SV=4                                                      | 0,101540395  | 1,510976 |
| P42224 | Signal transducer and activator of transcription 1-alpha/beta OS=Homo sapiens OX=9606 GN=STAT1 PE=1 SV=2                         | -0,104653014 | 1,508935 |
| Q9HAN9 | Nicotinamide/nicotinic acid mononucleotide adenyltransferase 1 OS=Homo sapiens OX=9606 GN=NMNAT1 PE=1 SV=1                       | 0,718131812  | 1,508358 |
| Q15691 | Microtubule-associated protein RP/EB family member 1 OS=Homo sapiens OX=9606 GN=MAPRE1 PE=1 SV=3                                 | 0,155693463  | 1,508314 |
| Q9R656 | NudC domain-containing protein 1 OS=Homo sapiens OX=9606 GN=NUDC1 PE=1 SV=2                                                      | 0,238665692  | 1,507098 |
| P54652 | Heat shock-related 70 kDa protein 2 OS=Homo sapiens OX=9606 GN=HSPA2 PE=1 SV=1                                                   | 0,150205891  | 1,505781 |
| Q13151 | Heterogeneous nuclear ribonucleoprotein A0 OS=Homo sapiens OX=9606 GN=HNRNPA0 PE=1 SV=1                                          | -0,261729019 | 1,504231 |
| Q9GZL7 | Ribosome biogenesis protein WDR12 OS=Homo sapiens OX=9606 GN=WDR12 PE=1 SV=2                                                     | 0,293798863  | 1,502377 |
| Q5CZC0 | Fibrous sheath-interacting protein 2 OS=Homo sapiens OX=9606 GN=FSIP2 PE=2 SV=4                                                  | -0,714382865 | 1,502256 |
| Q9HOR4 | Halocacid dehalogenase-like hydrolase domain-containing protein 2 OS=Homo sapiens OX=9606 GN=HDHD2 PE=1 SV=1                     | -0,433125002 | 1,500983 |
| O95396 | Adenyltransferase and sulfurtransferase MOCS3 OS=Homo sapiens OX=9606 GN=MOCS3 PE=1 SV=1                                         | 0,532507168  | 1,500924 |
| P51798 | H(+)/Cl(-) exchange transporter 7 OS=Homo sapiens OX=9606 GN=CLCN7 PE=1 SV=2                                                     | 0,712709909  | 1,499527 |
| Q9UGI8 | Testin OS=Homo sapiens OX=9606 GN=TES PE=1 SV=1                                                                                  | 0,154951016  | 1,499191 |
| Q6NXS1 | #N/D                                                                                                                             | 0,34238606   | 1,499156 |
| Q7L523 | Ras-related GTP-binding protein A OS=Homo sapiens OX=9606 GN=RRAGA PE=1 SV=1                                                     | -0,711409994 | 1,497403 |
| P23634 | Plasma membrane calcium-transporting ATPase 4 OS=Homo sapiens OX=9606 GN=ATP2B4 PE=1 SV=2                                        | 0,123459191  | 1,497101 |
| Q13642 | Four and a half LIM domains protein 1 OS=Homo sapiens OX=9606 GN=FHL1 PE=1 SV=4                                                  | -0,192832466 | 1,493216 |
| Q8IW87 | WD repeat and FYVE domain-containing protein 1 OS=Homo sapiens OX=9606 GN=WDFY1 PE=1 SV=1                                        | 0,259966348  | 1,492136 |
| Q32P28 | Prolyl 3-hydroxylase 1 OS=Homo sapiens OX=9606 GN=P3H1 PE=1 SV=2                                                                 | 0,144392846  | 1,492113 |
| Q6PIU2 | Neutral cholesterol ester hydrolase 1 OS=Homo sapiens OX=9606 GN=NCEH1 PE=1 SV=3                                                 | 0,174159055  | 1,491498 |
| P33993 | DNA replication licensing factor MCM7 OS=Homo sapiens OX=9606 GN=MCM7 PE=1 SV=4                                                  | 0,236434257  | 1,490009 |
| P40763 | Signal transducer and activator of transcription 3 OS=Homo sapiens OX=9606 GN=STAT3 PE=1 SV=2                                    | -0,13593914  | 1,489418 |
| Q9Y508 | E3 ubiquitin-protein ligase RNF114 OS=Homo sapiens OX=9606 GN=RNF114 PE=1 SV=1                                                   | 0,34033573   | 1,489122 |
| Q08379 | Golgin subfamily A member 2 OS=Homo sapiens OX=9606 GN=GOLGA2 PE=1 SV=3                                                          | 0,159897545  | 1,488399 |
| Q9Y5M8 | Signal recognition particle receptor subunit beta OS=Homo sapiens OX=9606 GN=SRPRB PE=1 SV=3                                     | 0,166251923  | 1,486239 |
| P49427 | Ubiquitin-conjugating enzyme E2 R1 OS=Homo sapiens OX=9606 GN=CDC34 PE=1 SV=2                                                    | -0,428422138 | 1,484285 |
| P16403 | Histone H1.2 OS=Homo sapiens OX=9606 GN=HIST1H1C PE=1 SV=2                                                                       | 0,290389934  | 1,482072 |
| Q14558 | Phosphoribosyl pyrophosphate synthase-associated protein 1 OS=Homo sapiens OX=9606 GN=PRPSAP1 PE=1 SV=2                          | 0,235231406  | 1,480814 |
| Q8WZA0 | Protein LZIC OS=Homo sapiens OX=9606 GN=LZIC PE=1 SV=1                                                                           | -0,29010932  | 1,480402 |
| P51570 | Galactokinase OS=Homo sapiens OX=9606 GN=GALK1 PE=1 SV=1                                                                         | 0,181456918  | 1,478778 |
| Q9C0E8 | Endoplasmic reticulum junction formation protein lunapark OS=Homo sapiens OX=9606 GN=LNPX PE=1 SV=2                              | 0,289768298  | 1,478373 |
| P82930 | 28S ribosomal protein S34, mitochondrial OS=Homo sapiens OX=9606 GN=MRPS34 PE=1 SV=2                                             | 0,569592367  | 1,478372 |
| P0D181 | Trafficking protein particle complex subunit 2 OS=Homo sapiens OX=9606 GN=TRAPP2 PE=1 SV=1                                       | -0,698782383 | 1,476645 |
| Q8WVY3 | U4/U6 small nuclear ribonucleoprotein Prp31 OS=Homo sapiens OX=9606 GN=PRPF31 PE=1 SV=2                                          | 0,426205864  | 1,476404 |
| P08572 | Collagen alpha-2(IV) chain OS=Homo sapiens OX=9606 GN=COL4A2 PE=1 SV=4                                                           | 0,426010918  | 1,47571  |
| P0CAP2 | DNA-directed RNA polymerase II subunit GRINL1A OS=Homo sapiens OX=9606 GN=POLR2M PE=1 SV=1                                       | 0,441477835  | 1,475194 |
| P11413 | Glucose-6-phosphate 1-dehydrogenase OS=Homo sapiens OX=9606 GN=G6PD PE=1 SV=4                                                    | -0,106299772 | 1,474875 |
| P36021 | Monocarboxylate transporter 8 OS=Homo sapiens OX=9606 GN=SLC16A2 PE=1 SV=2                                                       | 0,946326473  | 1,474496 |
| Q969U7 | Proteasome assembly chaperone 2 OS=Homo sapiens OX=9606 GN=PSMG2 PE=1 SV=1                                                       | -0,425589013 | 1,474209 |
| P28300 | Protein-lysine 6-oxidase OS=Homo sapiens OX=9606 GN=LOX PE=1 SV=2                                                                | 0,165137517  | 1,473692 |
| Q4KMQ2 | Anoctamin-6 OS=Homo sapiens OX=9606 GN=ANO6 PE=1 SV=2                                                                            | 0,696719559  | 1,473232 |
| Q9NPA0 | ER membrane protein complex subunit 7 OS=Homo sapiens OX=9606 GN=EMC7 PE=1 SV=1                                                  | 0,336800582  | 1,471824 |
| Q07617 | Sperm-associated antigen 1 OS=Homo sapiens OX=9606 GN=SPAG1 PE=1 SV=3                                                            | 3,290563932  | 1,471546 |
| P25686 | Dnal homolog subfamily B member 2 OS=Homo sapiens OX=9606 GN=DNAJB2 PE=1 SV=3                                                    | 0,424617668  | 1,470752 |
| P26447 | Protein S100-A4 OS=Homo sapiens OX=9606 GN=S100A4 PE=1 SV=1                                                                      | 0,424432174  | 1,470091 |
| P06702 | Protein S100-A9 OS=Homo sapiens OX=9606 GN=S100A9 PE=1 SV=1                                                                      | -0,69415532  | 1,46898  |
| Q01518 | Adenyl cyclase-associated protein 1 OS=Homo sapiens OX=9606 GN=CAP1 PE=1 SV=5                                                    | -0,10418917  | 1,468955 |
| P54709 | Sodium/potassium-transporting ATPase subunit beta-3 OS=Homo sapiens OX=9606 GN=ATP1B3 PE=1 SV=1                                  | 0,215945268  | 1,467986 |
| P31939 | Bifunctional purine biosynthesis protein PURH OS=Homo sapiens OX=9606 GN=ATIC PE=1 SV=3                                          | -0,096313085 | 1,465878 |
| Q965W2 | Protein cereblon OS=Homo sapiens OX=9606 GN=CRBN PE=1 SV=1                                                                       | 0,053560056  | 1,465524 |
| Q9NPJ3 | Acyl-coenzyme A thioesterase 13 OS=Homo sapiens OX=9606 GN=ACOT13 PE=1 SV=1                                                      | -0,282047314 | 1,464958 |
| P49069 | Calcium signal-modulating cyclophilin ligand OS=Homo sapiens OX=9606 GN=CAMLG PE=1 SV=1                                          | 0,325512403  | 1,463986 |
| Q8NFP7 | #N/D                                                                                                                             | -0,690957446 | 1,463663 |
| Q06323 | Proteasome activator complex subunit 1 OS=Homo sapiens OX=9606 GN=PSME1 PE=1 SV=1                                                | 0,157777229  | 1,463499 |
| P30040 | Endoplasmic reticulum resident protein 29 OS=Homo sapiens OX=9606 GN=ERP29 PE=1 SV=4                                             | -0,189719614 | 1,46327  |
| O95147 | Dual specificity protein phosphatase 14 OS=Homo sapiens OX=9606 GN=DUSP14 PE=1 SV=1                                              | 0,690392815  | 1,462723 |
| P31483 | Nucleolysin TIA-1 isoform p40 OS=Homo sapiens OX=9606 GN=TIA1 PE=1 SV=3                                                          | -0,308604557 | 1,462345 |
| P10515 | Dihydrolipoyllysine-residue acetyltransferase component of pyruvate dehydrogenase complex, mitochondrial OS=Homo sapiens OX=9606 | 0,189604809  | 1,462169 |
| P63010 | AP-2 complex subunit beta OS=Homo sapiens OX=9606 GN=AP2B1 PE=1 SV=1                                                             | 0,092235153  | 1,461728 |
| Q12979 | Active breakpoint cluster region-related protein OS=Homo sapiens OX=9606 GN=ABR PE=1 SV=2                                        | -0,215100465 | 1,460947 |

|        |                                                                                                                                                       |              |          |
|--------|-------------------------------------------------------------------------------------------------------------------------------------------------------|--------------|----------|
| Q01130 | Serine/arginine-rich splicing factor 2 OS=Homo sapiens OX=9606 GN=SRSF2 PE=1 SV=4                                                                     | 0,23249949   | 1,459975 |
| Q9H9G7 | Protein argonaute-3 OS=Homo sapiens OX=9606 GN=AGO3 PE=1 SV=2                                                                                         | -1,169947267 | 1,45888  |
| Q13586 | Stromal interaction molecule 1 OS=Homo sapiens OX=9606 GN=STIM1 PE=1 SV=3                                                                             | -0,189079127 | 1,457129 |
| Q9BUH6 | Protein PAXX OS=Homo sapiens OX=9606 GN=PAXX PE=1 SV=2                                                                                                | 0,685826308  | 1,455101 |
| Q02224 | Centromere-associated protein E OS=Homo sapiens OX=9606 GN=CENPE PE=1 SV=2                                                                            | 1,883837453  | 1,454233 |
| Q95834 | Echinoderm microtubule-associated protein-like 2 OS=Homo sapiens OX=9606 GN=EML2 PE=1 SV=1                                                            | -0,419896447 | 1,453928 |
| Q43739 | Cytohesin-3 OS=Homo sapiens OX=9606 GN=CYTH3 PE=1 SV=2                                                                                                | -0,649950991 | 1,453743 |
| Q9Y272 | AP-3 complex subunit mu-1 OS=Homo sapiens OX=9606 GN=AP3M1 PE=1 SV=1                                                                                  | -0,200224641 | 1,453445 |
| Q14571 | Inositol 1,4,5-trisphosphate receptor type 2 OS=Homo sapiens OX=9606 GN=ITPR2 PE=1 SV=2                                                               | 0,382926969  | 1,452575 |
| Q9NQD4 | Prefoldin subunit 4 OS=Homo sapiens OX=9606 GN=PFDN4 PE=1 SV=1                                                                                        | -0,683896614 | 1,45187  |
| Q99442 | Translocation protein SEC62 OS=Homo sapiens OX=9606 GN=SEC62 PE=1 SV=1                                                                                | 0,419163109  | 1,451311 |
| Q09028 | Histone-binding protein RBBP4 OS=Homo sapiens OX=9606 GN=RBBP4 PE=1 SV=3                                                                              | 0,231275528  | 1,450659 |
| Q9H7Z7 | Prostaglandin E synthase 2 OS=Homo sapiens OX=9606 GN=PTGES2 PE=1 SV=1                                                                                | -0,285047762 | 1,450318 |
| Q15257 | Serine/threonine-protein phosphatase 2A activator OS=Homo sapiens OX=9606 GN=PTPA PE=1 SV=3                                                           | -0,231190133 | 1,45001  |
| Q6IAA8 | Ragulator complex protein LAMTOR1 OS=Homo sapiens OX=9606 GN=LAMTOR1 PE=1 SV=2                                                                        | 0,284871129  | 1,449269 |
| Q9NYU1 | UDP-glucose:glycoprotein glucosyltransferase 2 OS=Homo sapiens OX=9606 GN=UGGT2 PE=1 SV=4                                                             | -0,253546394 | 1,448227 |
| Q95470 | Sphingosine-1-phosphate lyase 1 OS=Homo sapiens OX=9606 GN=SGPL1 PE=1 SV=3                                                                            | 0,199637602  | 1,448182 |
| P12694 | 2-oxoisovalerate dehydrogenase subunit alpha, mitochondrial OS=Homo sapiens OX=9606 GN=BCKDHA PE=1 SV=2                                               | 0,680823162  | 1,446714 |
| O15067 | Phosphoribosylformylglycinamide synthase OS=Homo sapiens OX=9606 GN=PFAS PE=1 SV=4                                                                    | 0,156040511  | 1,4432   |
| P32856 | Syntaxin-2 OS=Homo sapiens OX=9606 GN=STX2 PE=1 SV=3                                                                                                  | 0,518119002  | 1,44037  |
| O15710 | Serine/threonine-protein phosphatase 6 regulatory subunit 2 OS=Homo sapiens OX=9606 GN=PPP6R2 PE=1 SV=2                                               | -0,676938905 | 1,440176 |
| P01137 | Transforming growth factor beta-1 proprotein OS=Homo sapiens OX=9606 GN=TGFB1 PE=1 SV=2                                                               | 0,675927436  | 1,43847  |
| Q95816 | BAG family molecular chaperone regulator 2 OS=Homo sapiens OX=9606 GN=BAG2 PE=1 SV=1                                                                  | 0,187093527  | 1,438134 |
| Q9Y376 | Calcium-binding protein 39 OS=Homo sapiens OX=9606 GN=CAB39 PE=1 SV=1                                                                                 | -0,229464467 | 1,436898 |
| Q49959 | Double-strand break repair protein MRE11 OS=Homo sapiens OX=9606 GN=MRE11 PE=1 SV=3                                                                   | -0,41451618  | 1,434716 |
| Q9H4A3 | Serine/threonine-protein kinase WNK1 OS=Homo sapiens OX=9606 GN=WNK1 PE=1 SV=2                                                                        | -0,198096027 | 1,434384 |
| P14121 | Protein Wnt-5a OS=Homo sapiens OX=9606 GN=WNT5A PE=1 SV=2                                                                                             | -0,414286032 | 1,433893 |
| P09132 | Signal recognition particle 19 kDa protein OS=Homo sapiens OX=9606 GN=SRP19 PE=1 SV=3                                                                 | -0,328923317 | 1,433299 |
| Q95861 | 3'-(2',5'-bisphosphate nucleotidase 1 OS=Homo sapiens OX=9606 GN=BPNT1 PE=1 SV=1                                                                      | 0,197958706  | 1,433157 |
| O75477 | Erlin-1 OS=Homo sapiens OX=9606 GN=ERLIN1 PE=1 SV=2                                                                                                   | 0,176910698  | 1,432633 |
| Q01469 | Fatty acid-binding protein 5 OS=Homo sapiens OX=9606 GN=FABP5 PE=1 SV=3                                                                               | -0,211630784 | 1,432119 |
| Q15024 | Exosome complex component RRP42 OS=Homo sapiens OX=9606 GN=EXOSC7 PE=1 SV=3                                                                           | 0,41367271   | 1,4317   |
| O95427 | GPI ethanolamine phosphate transferase 1 OS=Homo sapiens OX=9606 GN=PIGN PE=1 SV=1                                                                    | 1,056381598  | 1,430825 |
| Q14999 | Cullin-7 OS=Homo sapiens OX=9606 GN=CUL7 PE=1 SV=2                                                                                                    | 0,619366819  | 1,429906 |
| P11182 | Lipoamide acyltransferase component of branched-chain alpha-keto acid dehydrogenase complex, mitochondrial OS=Homo sapiens OX=9606 GN=BCDH2 PE=1 SV=2 | 0,327425831  | 1,429579 |
| P34931 | Heat shock 70 kDa protein 1-like OS=Homo sapiens OX=9606 GN=HSPA1L PE=1 SV=2                                                                          | -0,609231614 | 1,424797 |
| Q5JSH3 | WD repeat-containing protein 44 OS=Homo sapiens OX=9606 GN=WDR44 PE=1 SV=1                                                                            | 0,167787233  | 1,42336  |
| Q9Y6A5 | Transforming acidic coiled-coil-containing protein 3 OS=Homo sapiens OX=9606 GN=TACC3 PE=1 SV=1                                                       | 0,411186484  | 1,422805 |
| Q9H098 | Protein FAM107B OS=Homo sapiens OX=9606 GN=FAM107B PE=1 SV=1                                                                                          | -0,664807891 | 1,419611 |
| Q06136 | 3-ketodihydroxyphosphoglycerate reductase OS=Homo sapiens OX=9606 GN=KDSR PE=1 SV=1                                                                   | -0,325990609 | 1,418965 |
| Q9UL25 | Ras-related protein Rab-21 OS=Homo sapiens OX=9606 GN=RAB21 PE=1 SV=3                                                                                 | 0,19634461   | 1,418749 |
| P21127 | Cyclin-dependent kinase 11B OS=Homo sapiens OX=9606 GN=CDK11B PE=1 SV=4                                                                               | 0,664226661  | 1,41862  |
| Q8IV08 | Phospholipase D3 OS=Homo sapiens OX=9606 GN=PLD3 PE=1 SV=1                                                                                            | -0,324994851 | 1,414089 |
| P62826 | GTP-binding nuclear protein Ran OS=Homo sapiens OX=9606 GN=RAN PE=1 SV=3                                                                              | 0,184520413  | 1,41362  |
| Q9Y2H1 | Serine/threonine-protein kinase 38-like OS=Homo sapiens OX=9606 GN=STK38L PE=1 SV=3                                                                   | -0,324697055 | 1,412644 |
| P54578 | Ubiquitin carboxyl-terminal hydrolase 14 OS=Homo sapiens OX=9606 GN=USP14 PE=1 SV=3                                                                   | 0,117877617  | 1,411085 |
| Q9UM56 | Synaptopodin-2 OS=Homo sapiens OX=9606 GN=SYNPO2 PE=1 SV=2                                                                                            | -0,184148181 | 1,410083 |
| Q8NEU8 | DCC-interacting protein 13-beta OS=Homo sapiens OX=9606 GN=APPL2 PE=1 SV=3                                                                            | -0,16638577  | 1,408497 |
| Q9UHG3 | Prenylcysteine oxidase 1 OS=Homo sapiens OX=9606 GN=PCYOX1 PE=1 SV=3                                                                                  | 0,153041319  | 1,408348 |
| Q04721 | Neurogenic locus notch homolog protein 2 OS=Homo sapiens OX=9606 GN=NOTCH2 PE=1 SV=3                                                                  | -0,123426979 | 1,408305 |
| Q96953 | Zinc finger protein 622 OS=Homo sapiens OX=9606 GN=ZNF622 PE=1 SV=1                                                                                   | 0,657423627  | 1,406982 |
| O75691 | Small subunit processome component 20 homolog OS=Homo sapiens OX=9606 GN=UTP20 PE=1 SV=3                                                              | -0,58111637  | 1,405877 |
| O15231 | Zinc finger protein 185 OS=Homo sapiens OX=9606 GN=ZNF185 PE=1 SV=3                                                                                   | -0,317792157 | 1,404448 |
| Q9NZ01 | Very-long-chain enoyl-CoA reductase OS=Homo sapiens OX=9606 GN=TECR PE=1 SV=1                                                                         | -0,194602076 | 1,403237 |
| P24821 | Tenascin OS=Homo sapiens OX=9606 GN=TNC PE=1 SV=3                                                                                                     | -0,069386565 | 1,401427 |
| O00186 | Syntaxin-binding protein 3 OS=Homo sapiens OX=9606 GN=STXB3 PE=1 SV=2                                                                                 | 0,183230058  | 1,401137 |
| P84243 | Histone H3.3 OS=Homo sapiens OX=9606 GN=H3F3A PE=1 SV=2                                                                                               | 0,404728335  | 1,399661 |
| Q9UNF0 | Protein kinase C and casein kinase substrate in neurons protein 2 OS=Homo sapiens OX=9606 GN=PACSN2 PE=1 SV=2                                         | 0,141736733  | 1,399006 |
| Q72687 | SLIT-ROBO Rho GTPase-activating protein 1 OS=Homo sapiens OX=9606 GN=SRGAP1 PE=1 SV=1                                                                 | 0,403677167  | 1,395888 |
| Q12981 | Vesicle transport protein SEC20 OS=Homo sapiens OX=9606 GN=BNIP1 PE=1 SV=3                                                                            | -0,650264833 | 1,394658 |
| Q14061 | Cytochrome c oxidase copper chaperone OS=Homo sapiens OX=9606 GN=COX17 PE=1 SV=2                                                                      | 0,402752938  | 1,39257  |
| Q9H6S3 | Epidermal growth factor receptor kinase substrate 8-like protein 2 OS=Homo sapiens OX=9606 GN=EPS8L2 PE=1 SV=2                                        | -0,223514505 | 1,391886 |
| Q9BQS8 | FYVE and coiled-coil domain-containing protein 1 OS=Homo sapiens OX=9606 GN=FYCO1 PE=1 SV=3                                                           | 0,320320353  | 1,391266 |
| Q9H4A4 | Aminopeptidase B OS=Homo sapiens OX=9606 GN=RNPEP PE=1 SV=2                                                                                           | -0,125405433 | 1,391084 |
| Q9Y450 | HBS1-like protein OS=Homo sapiens OX=9606 GN=HBS1L PE=1 SV=1                                                                                          | 0,164624484  | 1,389883 |
| Q9BVG9 | Phosphatidylserine synthase 2 OS=Homo sapiens OX=9606 GN=PTDSS2 PE=1 SV=1                                                                             | 0,682072499  | 1,38873  |
| Q9NZL9 | Methionine adenosyltransferase 2 subunit beta OS=Homo sapiens OX=9606 GN=MAT2B PE=1 SV=1                                                              | 0,192948581  | 1,388558 |
| Q02750 | Dual specificity mitogen-activated protein kinase kinase 1 OS=Homo sapiens OX=9606 GN=MAP2K1 PE=1 SV=2                                                | 0,206341305  | 1,388436 |
| Q14667 | Protein KIAA0100 OS=Homo sapiens OX=9606 GN=KIAA0100 PE=1 SV=3                                                                                        | 0,646469653  | 1,388092 |
| Q9H488 | GDP-fucose protein O-fucosyltransferase 1 OS=Homo sapiens OX=9606 GN=POFUT1 PE=1 SV=1                                                                 | 0,222892612  | 1,387199 |
| Q13287 | N-myc-interactor OS=Homo sapiens OX=9606 GN=NMI PE=1 SV=2                                                                                             | -0,770143438 | 1,386617 |
| Q9Y282 | Endoplasmic reticulum-Golgi intermediate compartment protein 3 OS=Homo sapiens OX=9606 GN=ERIC3 PE=1 SV=1                                             | 0,244460162  | 1,386485 |
| Q5VT25 | Serine/threonine-protein kinase MRCK alpha OS=Homo sapiens OX=9606 GN=CDC42BPB PE=1 SV=1                                                              | -0,244405522 | 1,386116 |
| Q15075 | Early endosome antigen 1 OS=Homo sapiens OX=9606 GN=EAA1 PE=1 SV=2                                                                                    | 0,085177154  | 1,38542  |
| Q9Y4P3 | Transducin beta-like protein 2 OS=Homo sapiens OX=9606 GN=TBL2 PE=1 SV=1                                                                              | 0,150856716  | 1,383124 |
| O00139 | Kinesin-like protein KIF2A OS=Homo sapiens OX=9606 GN=KIF2A PE=1 SV=3                                                                                 | -0,205622213 | 1,382523 |
| P50995 | Annexin A11 OS=Homo sapiens OX=9606 GN=ANXA11 PE=1 SV=1                                                                                               | 0,131909061  | 1,382458 |
| Q9BSL1 | Ubiquitin-associated domain-containing protein 1 OS=Homo sapiens OX=9606 GN=UBAC1 PE=1 SV=1                                                           | 0,563340964  | 1,381018 |
| P48723 | Heat shock 70 kDa protein 13 OS=Homo sapiens OX=9606 GN=HSPA13 PE=1 SV=1                                                                              | -0,318181758 | 1,380825 |
| Q13542 | Eukaryotic translation initiation factor 4E-binding protein 2 OS=Homo sapiens OX=9606 GN=EIF4EBP2 PE=1 SV=1                                           | 0,875281094  | 1,379526 |
| P31151 | Protein S100-A7 OS=Homo sapiens OX=9606 GN=S100A7 PE=1 SV=4                                                                                           | -0,640470273 | 1,377666 |
| Q13564 | NETD8-activating enzyme E1 regulatory subunit OS=Homo sapiens OX=9606 GN=NAE1 PE=1 SV=1                                                               | 0,163384619  | 1,376823 |
| P11234 | Ras-related protein Ral-B OS=Homo sapiens OX=9606 GN=RALB PE=1 SV=1                                                                                   | 0,639571575  | 1,376099 |
| Q9H944 | Mediator of RNA polymerase II transcription subunit 20 OS=Homo sapiens OX=9606 GN=MED20 PE=1 SV=1                                                     | 0,638576294  | 1,374363 |
| Q96E78 | Golgi apparatus membrane protein TVP23 homolog C OS=Homo sapiens OX=9606 GN=TVP23C PE=1 SV=3                                                          | 0,638359967  | 1,373985 |
| Q96K76 | Ubiquitin carboxyl-terminal hydrolase 47 OS=Homo sapiens OX=9606 GN=USP47 PE=1 SV=3                                                                   | -0,221044591 | 1,373291 |
| Q13232 | Nucleoside diphosphate kinase 3 OS=Homo sapiens OX=9606 GN=NME3 PE=1 SV=2                                                                             | 0,36276817   | 1,370997 |
| O14920 | Inhibitor of nuclear factor kappa-B kinase subunit beta OS=Homo sapiens OX=9606 GN=IKKB PE=1 SV=1                                                     | -0,636642873 | 1,370985 |
| Q16527 | Cysteine and glycine-rich protein 2 OS=Homo sapiens OX=9606 GN=CSR2 PE=1 SV=3                                                                         | -0,20419271  | 1,370785 |
| Q15836 | Vesicle-associated membrane protein 3 OS=Homo sapiens OX=9606 GN=VAMP3 PE=1 SV=3                                                                      | -0,220698713 | 1,370692 |
| Q01970 | 1-phosphatidylinositol 4,5-bisphosphate phosphodiesterase beta-3 OS=Homo sapiens OX=9606 GN=PLCB3 PE=1 SV=2                                           | 0,162768523  | 1,370346 |
| P29590 | Protein PML OS=Homo sapiens OX=9606 GN=PML PE=1 SV=3                                                                                                  | 0,144291336  | 1,370117 |
| Q8I283 | Aldehyde dehydrogenase family 16 member A1 OS=Homo sapiens OX=9606 GN=ALDH16A1 PE=1 SV=2                                                              | -0,24193185  | 1,369392 |
| Q8IY85 | Stromal membrane-associated protein 1 OS=Homo sapiens OX=9606 GN=SMAP1 PE=1 SV=2                                                                      | -0,635714834 | 1,369361 |
| Q9H3H3 | UPF0696 protein C11orf68 OS=Homo sapiens OX=9606 GN=C11orf68 PE=1 SV=3                                                                                | -0,220399109 | 1,368441 |
| O14578 | Citron Rho-interacting kinase OS=Homo sapiens OX=9606 GN=CIT PE=1 SV=2                                                                                | -0,393484171 | 1,368351 |
| P57678 | Gem-associated protein 4 OS=Homo sapiens OX=9606 GN=GEMIN4 PE=1 SV=2                                                                                  | 0,168152972  | 1,36776  |
| O00764 | Pyridoxal kinase OS=Homo sapiens OX=9606 GN=PDXK PE=1 SV=1                                                                                            | -0,190502088 | 1,366913 |

|        |                                                                                                                                |              |          |
|--------|--------------------------------------------------------------------------------------------------------------------------------|--------------|----------|
| Q9UM54 | Unconventional myosin-VI OS=Homo sapiens OX=9606 GN=MYO6 PE=1 SV=4                                                             | -0,149395135 | 1,366326 |
| Q16666 | Gamma-interferon-inducible protein 16 OS=Homo sapiens OX=9606 GN=IFI16 PE=1 SV=3                                               | -0,19028547  | 1,365    |
| Q14515 | SPARC-like protein 1 OS=Homo sapiens OX=9606 GN=SPARC1 PE=1 SV=2                                                               | 1,005870469  | 1,364086 |
| P61026 | Ras-related protein Rab-10 OS=Homo sapiens OX=9606 GN=RAB10 PE=1 SV=1                                                          | -0,179077019 | 1,362138 |
| Q9UGV2 | Protein NDRG3 OS=Homo sapiens OX=9606 GN=NDRG3 PE=1 SV=2                                                                       | 0,313595705  | 1,358447 |
| Q8IU02 | ELKS/Rab6-interacting/CAST family member 1 OS=Homo sapiens OX=9606 GN=ERC1 PE=1 SV=1                                           | 0,178553612  | 1,357215 |
| O14786 | Neuropilin-1 OS=Homo sapiens OX=9606 GN=NRP1 PE=1 SV=3                                                                         | 0,148594675  | 1,357152 |
| P45985 | Dual specificity mitogen-activated protein kinase kinase 4 OS=Homo sapiens OX=9606 GN=MAP2K4 PE=1 SV=1                         | -0,628489429 | 1,356675 |
| P13010 | X-ray repair cross-complementing protein 5 OS=Homo sapiens OX=9606 GN=XRCC5 PE=1 SV=3                                          | 0,099552184  | 1,356069 |
| Q9Y3Q3 | Transmembrane emp24 domain-containing protein 3 OS=Homo sapiens OX=9606 GN=TMED3 PE=1 SV=1                                     | -0,627687404 | 1,355262 |
| O60613 | Selenoprotein F OS=Homo sapiens OX=9606 GN=SELENOF PE=1 SV=4                                                                   | -0,312862891 | 1,354872 |
| P49207 | 60S ribosomal protein L34 OS=Homo sapiens OX=9606 GN=RPL34 PE=1 SV=3                                                           | 0,218500668  | 1,354197 |
| O15027 | Protein transport protein Sec16A OS=Homo sapiens OX=9606 GN=SEC16A PE=1 SV=4                                                   | -0,111459428 | 1,351677 |
| Q8TDZ2 | [F-actin]-monooxygenase MICAL1 OS=Homo sapiens OX=9606 GN=MICAL1 PE=1 SV=2                                                     | -0,142707241 | 1,351244 |
| Q16762 | Thiosulfate sulfurtransferase OS=Homo sapiens OX=9606 GN=TST PE=1 SV=4                                                         | -0,312089416 | 1,351101 |
| P0DP86 | DNA-directed RNA polymerases I and III subunit RPAC2 OS=Homo sapiens OX=9606 GN=POLR1D PE=1 SV=1                               | 0,625315781  | 1,351076 |
| Q99570 | Phosphoinositide 3-kinase regulatory subunit 4 OS=Homo sapiens OX=9606 GN=PIK3R4 PE=1 SV=3                                     | -0,268034141 | 1,349777 |
| O00217 | NADH dehydrogenase [ubiquinone] iron-sulfur protein 8, mitochondrial OS=Homo sapiens OX=9606 GN=NDUF58 PE=1 SV=1               | 0,26793661   | 1,349203 |
| Q53508 | Ras-related protein Rab-6D OS=Homo sapiens OX=9606 GN=RAB6D PE=2 SV=1                                                          | 0,390695991  | 1,349184 |
| O75694 | Nuclear pore complex protein Nup155 OS=Homo sapiens OX=9606 GN=NUP155 PE=1 SV=1                                                | -0,147825187 | 1,348351 |
| P15144 | Aminopeptidase N OS=Homo sapiens OX=9606 GN=ANPEP PE=1 SV=4                                                                    | -0,088897868 | 1,346777 |
| Q8TDH9 | Biogenesis of lysosome-related organelles complex 1 subunit 5 OS=Homo sapiens OX=9606 GN=BLOC1C5 PE=1 SV=1                     | 0,782822746  | 1,346364 |
| P43897 | Elongation factor Ts, mitochondrial OS=Homo sapiens OX=9606 GN=TSFM PE=1 SV=2                                                  | -0,267425112 | 1,346196 |
| Q96DZ1 | Endoplasmic reticulum lectin 1 OS=Homo sapiens OX=9606 GN=ERLEC1 PE=1 SV=1                                                     | -0,201167013 | 1,34602  |
| O14964 | Hepatocyte growth factor-regulated tyrosine kinase substrate OS=Homo sapiens OX=9606 GN=HGS PE=1 SV=1                          | 0,129063388  | 1,344899 |
| Q9BS07 | Cancer-related nucleoside-triphosphatase OS=Homo sapiens OX=9606 GN=NTPCR PE=1 SV=1                                            | 0,621497699  | 1,344320 |
| P32969 | 60S ribosomal protein L9 OS=Homo sapiens OX=9606 GN=RPL9 PE=1 SV=1                                                             | 0,187798535  | 1,343094 |
| P51398 | 28S ribosomal protein S29, mitochondrial OS=Homo sapiens OX=9606 GN=DAP3 PE=1 SV=1                                             | -0,38868136  | 1,341917 |
| Q9Y3E1 | Hepatoma-derived growth factor-related protein 3 OS=Homo sapiens OX=9606 GN=HDGLF3 PE=1 SV=1                                   | -0,388615311 | 1,341678 |
| P05783 | #N/D                                                                                                                           | 0,176855118  | 1,341272 |
| Q8IVL5 | Prolyl 3-hydroxylase 2 OS=Homo sapiens OX=9606 GN=P3H2 PE=1 SV=1                                                               | -0,176636015 | 1,339219 |
| Q9Y3B7 | 39S ribosomal protein L11, mitochondrial OS=Homo sapiens OX=9606 GN=MRPL11 PE=1 SV=1                                           | 0,519817227  | 1,337626 |
| Q9XB16 | TBC1 domain family member 10A OS=Homo sapiens OX=9606 GN=TBC1D10A PE=1 SV=1                                                    | -0,52029273  | 1,337437 |
| Q96E11 | Ribosome-recycling factor, mitochondrial OS=Homo sapiens OX=9606 GN=MRRF PE=1 SV=1                                             | 2,0435438    | 1,33632  |
| P48307 | Tissue factor pathway inhibitor 2 OS=Homo sapiens OX=9606 GN=TFPI2 PE=1 SV=1                                                   | 0,308959982  | 1,335845 |
| P63151 | Serine/threonine-protein phosphatase 2A 55 kDa regulatory subunit B alpha isoform OS=Homo sapiens OX=9606 GN=PPP2R2A PE=1 SV=1 | 0,159169851  | 1,332692 |
| Q86W92 | Liprin-beta-1 OS=Homo sapiens OX=9606 GN=PPFIBP1 PE=1 SV=2                                                                     | -0,124494187 | 1,332116 |
| Q14653 | Interferon regulatory factor 3 OS=Homo sapiens OX=9606 GN=IRF3 PE=1 SV=1                                                       | -0,614562526 | 1,331986 |
| Q9HB71 | Calcyclin-binding protein OS=Homo sapiens OX=9606 GN=CACYBP PE=1 SV=2                                                          | 0,17586317   | 1,331985 |
| Q13330 | Metastasis-associated protein MTA1 OS=Homo sapiens OX=9606 GN=MTA1 PE=1 SV=2                                                   | 0,614153879  | 1,331257 |
| Q96T51 | RUN and FYVE domain-containing protein 1 OS=Homo sapiens OX=9606 GN=RUFY1 PE=1 SV=2                                            | 0,14631469   | 1,331125 |
| O14763 | Tumor necrosis factor receptor superfamily member 10B OS=Homo sapiens OX=9606 GN=TNFRSF10B PE=1 SV=2                           | 0,613517897  | 1,330122 |
| P01033 | Metalloproteinase inhibitor 1 OS=Homo sapiens OX=9606 GN=TIMP1 PE=1 SV=1                                                       | -0,264475561 | 1,328871 |
| P40939 | Trifunctional enzyme subunit alpha, mitochondrial OS=Homo sapiens OX=9606 GN=HADHA PE=1 SV=2                                   | 0,091826306  | 1,328086 |
| Q969H8 | Myeloid-derived growth factor OS=Homo sapiens OX=9606 GN=MYDGF PE=1 SV=1                                                       | -0,235707908 | 1,327483 |
| P24534 | Elongation factor 1-beta OS=Homo sapiens OX=9606 GN=EEF1B2 PE=1 SV=3                                                           | 0,175226992  | 1,326038 |
| O95429 | BAG family molecular chaperone regulator 4 OS=Homo sapiens OX=9606 GN=BAG4 PE=1 SV=1                                           | 0,384195051  | 1,325717 |
| O95833 | Chloride intracellular channel protein 3 OS=Homo sapiens OX=9606 GN=CLIC3 PE=1 SV=2                                            | 0,26390812   | 1,325541 |
| P50402 | Emerin OS=Homo sapiens OX=9606 GN=EMD PE=1 SV=1                                                                                | 0,166195748  | 1,325515 |
| Q9BS05 | Cerebral cavernous malformations 2 protein OS=Homo sapiens OX=9606 GN=CCM2 PE=1 SV=1                                           | -0,870350492 | 1,325288 |
| P23588 | Eukaryotic translation initiation factor 4B OS=Homo sapiens OX=9606 GN=EIF4B PE=1 SV=2                                         | 0,114746227  | 1,324121 |
| Q8WVV9 | Heterogeneous nuclear ribonucleoprotein L-like OS=Homo sapiens OX=9606 GN=HNRNPLL PE=1 SV=1                                    | 0,234995263  | 1,3227   |
| O60232 | Protein ZNRD2 OS=Homo sapiens OX=9606 GN=ZNRD2 PE=1 SV=1                                                                       | -0,38310644  | 1,321782 |
| Q9BT72 | Dehydrogenase/reductase SDR family member 4 OS=Homo sapiens OX=9606 GN=DHRS4 PE=1 SV=3                                         | 0,681136221  | 1,321275 |
| Q9Y696 | Chloride intracellular channel protein 4 OS=Homo sapiens OX=9606 GN=CLIC4 PE=1 SV=4                                            | 0,109346579  | 1,319281 |
| O14558 | Heat shock protein beta-6 OS=Homo sapiens OX=9606 GN=HSPB6 PE=1 SV=2                                                           | -0,19777916  | 1,318421 |
| Q13595 | Transformer-2 protein homolog alpha OS=Homo sapiens OX=9606 GN=TRA2A PE=1 SV=1                                                 | -0,606953241 | 1,318365 |
| O95352 | Ubiquitin-like modifier-activating enzyme ATG7 OS=Homo sapiens OX=9606 GN=ATG7 PE=1 SV=1                                       | -0,197704161 | 1,317811 |
| P35221 | Catenin alpha-1 OS=Homo sapiens OX=9606 GN=CTNNA1 PE=1 SV=1                                                                    | 0,08291898   | 1,317766 |
| Q14562 | ATP-dependent RNA helicase DHX8 OS=Homo sapiens OX=9606 GN=DHX8 PE=1 SV=1                                                      | 0,606408721  | 1,317387 |
| Q9H4L5 | Oxysterol-binding protein-related protein 3 OS=Homo sapiens OX=9606 GN=OSBP1L3 PE=1 SV=1                                       | 0,262458414  | 1,31704  |
| Q96EM0 | Trans-3-hydroxy-L-proline dehydratase OS=Homo sapiens OX=9606 GN=L3HYDPH PE=1 SV=2                                             | 0,304904691  | 1,316091 |
| Q5HYK7 | SH3 domain-containing protein 19 OS=Homo sapiens OX=9606 GN=SH3D19 PE=1 SV=2                                                   | 0,592480412  | 1,315331 |
| Q99714 | 3-hydroxyacyl-CoA dehydrogenase type-2 OS=Homo sapiens OX=9606 GN=HSD17B10 PE=1 SV=3                                           | 0,144855716  | 1,31455  |
| P11362 | Fibroblast growth factor receptor 1 OS=Homo sapiens OX=9606 GN=FGFR1 PE=1 SV=3                                                 | 0,326599052  | 1,314084 |
| P22413 | Ectonucleotide pyrophosphatase/phosphodiesterase family member 1 OS=Homo sapiens OX=9606 GN=ENPP1 PE=1 SV=2                    | -0,100621626 | 1,313788 |
| Q9Y6K0 | Choline/ethanolaminephosphotransferase 1 OS=Homo sapiens OX=9606 GN=CEPT1 PE=1 SV=1                                            | 0,603687774  | 1,31249  |
| Q9NY12 | H/ACA ribonucleoprotein complex subunit 1 OS=Homo sapiens OX=9606 GN=GAR1 PE=1 SV=1                                            | 0,380265439  | 1,311508 |
| Q8GT12 | Dipeptidyl peptidase 9 OS=Homo sapiens OX=9606 GN=DPP9 PE=1 SV=3                                                               | -0,261121228 | 1,309206 |
| P17844 | Probable ATP-dependent RNA helicase DDX5 OS=Homo sapiens OX=9606 GN=DDX5 PE=1 SV=1                                             | 0,134074928  | 1,304549 |
| P20020 | Plasma membrane calcium-transporting ATPase 1 OS=Homo sapiens OX=9606 GN=ATP2B1 PE=1 SV=4                                      | 0,122411275  | 1,304099 |
| Q9BT66 | Alanyl-tRNA editing protein Aarsd1 OS=Homo sapiens OX=9606 GN=AARSD1 PE=1 SV=2                                                 | -0,302350097 | 1,303656 |
| Q92734 | Protein TFG OS=Homo sapiens OX=9606 GN=TFG PE=1 SV=2                                                                           | -0,183224213 | 1,303041 |
| P30044 | Peroxioredoxin-5, mitochondrial OS=Homo sapiens OX=9606 GN=PRDX5 PE=1 SV=4                                                     | -0,163915106 | 1,303018 |
| Q13905 | Rap guanine nucleotide exchange factor 1 OS=Homo sapiens OX=9606 GN=RAPGEF1 PE=1 SV=3                                          | 0,447257039  | 1,302411 |
| Q9NWB1 | RNA binding protein fox-1 homolog 1 OS=Homo sapiens OX=9606 GN=RBFOX1 PE=1 SV=2                                                | -1,194661628 | 1,300618 |
| P61970 | Nuclear transport factor 2 OS=Homo sapiens OX=9606 GN=NUTF2 PE=1 SV=1                                                          | -0,231579439 | 1,29982  |
| P33121 | Long-chain-fatty-acid--CoA ligase 1 OS=Homo sapiens OX=9606 GN=ACSL1 PE=1 SV=1                                                 | 0,182850556  | 1,299784 |
| Q9UKM7 | Endoplasmic reticulum mannosyl-oligosaccharide 1,2-alpha-mannosidase OS=Homo sapiens OX=9606 GN=MAN1B1 PE=1 SV=2               | -0,231494541 | 1,299252 |
| Q8TCG1 | Protein CIP2A OS=Homo sapiens OX=9606 GN=CIP2A PE=1 SV=2                                                                       | -0,376839317 | 1,299106 |
| Q14738 | Serine/threonine-protein phosphatase 2A 56 kDa regulatory subunit delta isoform OS=Homo sapiens OX=9606 GN=PPP2R5D PE=1 SV=1   | 0,149321005  | 1,2991   |
| Q9NUU7 | ATP-dependent RNA helicase DDX19A OS=Homo sapiens OX=9606 GN=DDX19A PE=1 SV=1                                                  | 0,301410655  | 1,299085 |
| Q6N267 | Mitotic-spindle organizing protein 2B OS=Homo sapiens OX=9606 GN=MZT2B PE=1 SV=1                                               | -0,59574535  | 1,29813  |
| O95456 | Proteasome assembly chaperone 1 OS=Homo sapiens OX=9606 GN=PSMG1 PE=1 SV=1                                                     | -0,301148682 | 1,297781 |
| O75368 | SH3 domain-binding glutamic acid-rich-like protein OS=Homo sapiens OX=9606 GN=SH3BGL PE=1 SV=1                                 | 0,231274634  | 1,297782 |
| Q9NY80 | Telomeric repeat-binding factor 2-interacting protein 1 OS=Homo sapiens OX=9606 GN=TERF2IP PE=1 SV=1                           | 0,364606311  | 1,294417 |
| Q02218 | 2-oxoglutarate dehydrogenase, mitochondrial OS=Homo sapiens OX=9606 GN=OGDH PE=1 SV=3                                          | 0,097564987  | 1,292762 |
| P27816 | Microtubule-associated protein 4 OS=Homo sapiens OX=9606 GN=MAP4 PE=1 SV=3                                                     | 0,071593319  | 1,291106 |
| Q6NXE6 | Armadillo repeat-containing protein 6 OS=Homo sapiens OX=9606 GN=ARMC6 PE=1 SV=2                                               | -0,299707769 | 1,290801 |
| Q9Y3A6 | Transmembrane emp24 domain-containing protein 5 OS=Homo sapiens OX=9606 GN=TMED5 PE=1 SV=1                                     | 0,591491643  | 1,290396 |
| Q9POK7 | Ankyrin OS=Homo sapiens OX=9606 GN=ANK1 PE=1 SV=2                                                                              | 0,101070987  | 1,290153 |
| P54098 | DNA polymerase subunit gamma-1 OS=Homo sapiens OX=9606 GN=POLG PE=1 SV=1                                                       | -0,644072707 | 1,289889 |
| Q8NE71 | ATP-binding cassette sub-family F member 1 OS=Homo sapiens OX=9606 GN=ABCF1 PE=1 SV=2                                          | 0,137438172  | 1,289044 |
| O94763 | Unconventional prefoldin RP5 interactor 1 OS=Homo sapiens OX=9606 GN=UR1 PE=1 SV=3                                             | -0,590147267 | 1,287945 |
| Q13263 | Transcription intermediary factor 1-beta OS=Homo sapiens OX=9606 GN=TRIM28 PE=1 SV=5                                           | 0,09888135   | 1,285086 |
| P34897 | Serine hydroxymethyltransferase, mitochondrial OS=Homo sapiens OX=9606 GN=SHMT2 PE=1 SV=3                                      | 0,120813869  | 1,282742 |
| Q07960 | Rho GTPase-activating protein 1 OS=Homo sapiens OX=9606 GN=ARHGAP1 PE=1 SV=1                                                   | -0,124156937 | 1,280915 |
| O14683 | Tumor protein p53-inducible protein 11 OS=Homo sapiens OX=9606 GN=TP53I11 PE=1 SV=2                                            | 0,585862469  | 1,280115 |

|        |                                                                                                               |              |          |
|--------|---------------------------------------------------------------------------------------------------------------|--------------|----------|
| Q93062 | RNA-binding protein with multiple splicing OS=Homo sapiens OX=9606 GN=RBPMS PE=1 SV=1                         | 0,371497923  | 1,279746 |
| Q9UBQ0 | Vacuolar protein sorting-associated protein 29 OS=Homo sapiens OX=9606 GN=VPS29 PE=1 SV=1                     | -0,180484086 | 1,279199 |
| Q15143 | Actin-related protein 2/3 complex subunit 1B OS=Homo sapiens OX=9606 GN=ARP1B PE=1 SV=3                       | 0,127806407  | 1,279019 |
| Q14008 | Cytoskeleton-associated protein 5 OS=Homo sapiens OX=9606 GN=CKAP5 PE=1 SV=3                                  | 0,07996227   | 1,278143 |
| P19387 | DNA-directed RNA polymerase II subunit RPB3 OS=Homo sapiens OX=9606 GN=POLR2C PE=1 SV=2                       | -0,150757391 | 1,27801  |
| Q12HG2 | STE20-like serine/threonine-protein kinase OS=Homo sapiens OX=9606 GN=SLK PE=1 SV=1                           | 0,127692987  | 1,277598 |
| Q8TAA9 | Vang-like protein 1 OS=Homo sapiens OX=9606 GN=VANGL1 PE=1 SV=1                                               | -0,363775259 | 1,277191 |
| Q9C005 | Protein TANC1 OS=Homo sapiens OX=9606 GN=TANC1 PE=1 SV=3                                                      | 1,166621841  | 1,276334 |
| Q9ULAO | Aspartyl aminopeptidase OS=Homo sapiens OX=9606 GN=DNPEP PE=1 SV=1                                            | -0,29671165  | 1,276236 |
| P11166 | Solute carrier family 2, facilitated glucose transporter member 1 OS=Homo sapiens OX=9606 GN=SLC2A1 PE=1 SV=2 | 0,254712232  | 1,271752 |
| O95782 | AP-2 complex subunit alpha-1 OS=Homo sapiens OX=9606 GN=AP2A1 PE=1 SV=3                                       | -0,078497151 | 1,267676 |
| P15531 | Nucleoside diphosphate kinase A OS=Homo sapiens OX=9606 GN=NME1 PE=1 SV=1                                     | 0,168892174  | 1,267214 |
| Q01081 | Splicing factor U2AF 35 kDa subunit OS=Homo sapiens OX=9606 GN=U2AF1 PE=1 SV=3                                | -0,226636607 | 1,266846 |
| Q9NTZ6 | RNA-binding protein 12 OS=Homo sapiens OX=9606 GN=RBM12 PE=1 SV=1                                             | -0,294280719 | 1,264426 |
| P26440 | Isovaleryl-CoA dehydrogenase, mitochondrial OS=Homo sapiens OX=9606 GN=IVD PE=1 SV=2                          | 0,190823426  | 1,262192 |
| Q13011 | Delta(3,5)-Delta(2,4)-dienoyl-CoA isomerase, mitochondrial OS=Homo sapiens OX=9606 GN=ECH1 PE=1 SV=2          | 0,190400254  | 1,25879  |
| P20936 | Ras GTPase-activating protein 1 OS=Homo sapiens OX=9606 GN=RASA1 PE=1 SV=1                                    | -0,139791203 | 1,257497 |
| Q13243 | Serine/arginine-rich splicing factor 5 OS=Homo sapiens OX=9606 GN=SRSF5 PE=1 SV=1                             | -0,365205063 | 1,2569   |
| P20290 | Transcription factor BTF3 OS=Homo sapiens OX=9606 GN=BTF3 PE=1 SV=1                                           | 0,177679921  | 1,254918 |
| Q9HAU5 | Regulator of nonsense transcripts 2 OS=Homo sapiens OX=9606 GN=UPF2 PE=1 SV=1                                 | -0,571592223 | 1,253818 |
| Q13636 | Ras-related protein Rab-31 OS=Homo sapiens OX=9606 GN=RAB31 PE=1 SV=1                                         | 0,523201733  | 1,252386 |
| O43660 | Pleiotropic regulator 1 OS=Homo sapiens OX=9606 GN=PLRG1 PE=1 SV=1                                            | -0,570562752 | 1,251907 |
| Q96584 | SRSF protein kinase 1 OS=Homo sapiens OX=9606 GN=SRPK1 PE=1 SV=2                                              | 0,570472314  | 1,25174  |
| P49754 | Vacuolar protein sorting-associated protein 41 homolog OS=Homo sapiens OX=9606 GN=VPS41 PE=1 SV=3             | 0,291624583  | 1,251531 |
| Q96KR1 | Zinc finger RNA-binding protein OS=Homo sapiens OX=9606 GN=ZFR PE=1 SV=2                                      | 0,167179333  | 1,251433 |
| O75436 | Vacuolar protein sorting-associated protein 26A OS=Homo sapiens OX=9606 GN=VPS26A PE=1 SV=2                   | -0,167132256 | 1,251    |
| P63000 | Ras-related C3 botulinum toxin substrate 1 OS=Homo sapiens OX=9606 GN=RAC1 PE=1 SV=1                          | 0,291232099  | 1,249627 |
| P61088 | Ubiquitin-conjugating enzyme E2 N OS=Homo sapiens OX=9606 GN=UBE2N PE=1 SV=1                                  | 0,166721566  | 1,247225 |
| Q13492 | Phosphatidylinositol-binding clathrin assembly protein OS=Homo sapiens OX=9606 GN=PICALM PE=1 SV=2            | 0,11496744   | 1,246699 |
| Q99615 | DnaJ homolog subfamily C member 7 OS=Homo sapiens OX=9606 GN=DNAJ7 PE=1 SV=2                                  | -0,158149277 | 1,246626 |
| Q15785 | Mitochondrial import receptor subunit TOM34 OS=Homo sapiens OX=9606 GN=TOMM34 PE=1 SV=2                       | 0,204009705  | 1,246564 |
| O15523 | ATP-dependent RNA helicase DDX3Y OS=Homo sapiens OX=9606 GN=DDX3Y PE=1 SV=2                                   | 0,290107128  | 1,244169 |
| Q9UL56 | Potassium voltage-gated channel subfamily S member 2 OS=Homo sapiens OX=9606 GN=KCN2S2 PE=1 SV=2              | 0,565664345  | 1,242794 |
| Q727A1 | Centriolin OS=Homo sapiens OX=9606 GN=CNTRL PE=1 SV=2                                                         | -0,919992036 | 1,242517 |
| O15127 | Secretory carrier-associated membrane protein 2 OS=Homo sapiens OX=9606 GN=SCAMP2 PE=1 SV=2                   | 0,361160703  | 1,242198 |
| Q14112 | Nidogen-2 OS=Homo sapiens OX=9606 GN=NID2 PE=1 SV=3                                                           | 0,508441507  | 1,242186 |
| P62306 | Small nuclear ribonucleoprotein F OS=Homo sapiens OX=9606 GN=SNRPF PE=1 SV=1                                  | 0,361128366  | 1,24208  |
| P62328 | Thymosin beta-4 OS=Homo sapiens OX=9606 GN=TMSB4X PE=1 SV=2                                                   | 0,361083586  | 1,241918 |
| P40227 | T-complex protein 1 subunit zeta OS=Homo sapiens OX=9606 GN=CCT6A PE=1 SV=3                                   | 0,102029776  | 1,241657 |
| Q9NUJ1 | Mycophenolic acid acyl-glucuronide esterase, mitochondrial OS=Homo sapiens OX=9606 GN=ABHD10 PE=1 SV=1        | -0,222270891 | 1,237859 |
| Q8N6T3 | ADP-ribosylation factor GTPase-activating protein 1 OS=Homo sapiens OX=9606 GN=ARFGAP1 PE=1 SV=2              | -0,187650953 | 1,236745 |
| O15091 | Mitochondrial ribonuclease P catalytic subunit OS=Homo sapiens OX=9606 GN=KIAA0391 PE=1 SV=2                  | 0,47031154   | 1,23573  |
| Q14624 | Inter-alpha-trypsin inhibitor heavy chain H4 OS=Homo sapiens OX=9606 GN=ITH4 PE=1 SV=4                        | -0,358651984 | 1,23071  |
| P18124 | 60S ribosomal protein L7 OS=Homo sapiens OX=9606 GN=RPL7 PE=1 SV=1                                            | 0,137593748  | 1,232979 |
| Q9NQ88 | Fructose-2,6-bisphosphatase TIGAR OS=Homo sapiens OX=9606 GN=TIGAR PE=1 SV=1                                  | 0,221255811  | 1,231138 |
| Q15293 | Reticulocalbin-1 OS=Homo sapiens OX=9606 GN=RCN1 PE=1 SV=1                                                    | -0,116907203 | 1,230982 |
| Q15437 | Protein transport protein Sec23B OS=Homo sapiens OX=9606 GN=SEC23B PE=1 SV=2                                  | -0,174861003 | 1,230603 |
| O00161 | Synaptosomal-associated protein 23 OS=Homo sapiens OX=9606 GN=SNAP23 PE=1 SV=1                                | 0,186883449  | 1,230608 |
| Q86WBO | Nuclear-interacting partner of ALK OS=Homo sapiens OX=9606 GN=ZC3HC1 PE=1 SV=1                                | 0,357766364  | 1,229847 |
| Q01813 | ATP-dependent 6-phosphofructokinase, platelet type OS=Homo sapiens OX=9606 GN=PFKP PE=1 SV=2                  | 0,097233466  | 1,22871  |
| O94903 | Pyridoxal phosphate homeostasis protein OS=Homo sapiens OX=9606 GN=PLPBP PE=1 SV=1                            | 0,247119223  | 1,227588 |
| P28799 | Progranulin OS=Homo sapiens OX=9606 GN=GRN PE=1 SV=2                                                          | -0,186472991 | 1,227329 |
| P14866 | Heterogeneous nuclear ribonucleoprotein L OS=Homo sapiens OX=9606 GN=HNRNPL PE=1 SV=2                         | 0,119942814  | 1,226746 |
| P09234 | U1 small nuclear ribonucleoprotein C OS=Homo sapiens OX=9606 GN=SNRPC PE=1 SV=1                               | -0,356911135 | 1,226734 |
| Q9H330 | Transmembrane protein 245 OS=Homo sapiens OX=9606 GN=TMEM245 PE=1 SV=3                                        | -1,079749411 | 1,226153 |
| P55212 | Caspase-6 OS=Homo sapiens OX=9606 GN=CASP6 PE=1 SV=2                                                          | -0,286368158 | 1,226042 |
| P35237 | Serpin B6 OS=Homo sapiens OX=9606 GN=SERPINB6 PE=1 SV=3                                                       | 0,127552894  | 1,225766 |
| Q16555 | Dihydropyrimidinase-related protein 2 OS=Homo sapiens OX=9606 GN=DPYSL2 PE=1 SV=1                             | 0,098930932  | 1,22532  |
| Q9Y220 | Protein SGT1 homolog OS=Homo sapiens OX=9606 GN=SGT1 PE=1 SV=3                                                | 0,123473762  | 1,225072 |
| P31946 | 14-3-3 protein beta/alpha OS=Homo sapiens OX=9606 GN=YWHAB PE=1 SV=3                                          | 0,186052912  | 1,223975 |
| O00193 | Small acidic protein OS=Homo sapiens OX=9606 GN=SMAP PE=1 SV=1                                                | 0,285839242  | 1,223479 |
| Q9UDY2 | Tight junction protein ZO-2 OS=Homo sapiens OX=9606 GN=TJP2 PE=1 SV=2                                         | 0,142217798  | 1,222802 |
| O95831 | Apoptosis-inducing factor 1, mitochondrial OS=Homo sapiens OX=9606 GN=AIFM1 PE=1 SV=1                         | 0,185888513  | 1,222663 |
| Q71311 | Armadillo repeat-containing X-linked protein 2 OS=Homo sapiens OX=9606 GN=ARMCX2 PE=2 SV=1                    | -0,219972228 | 1,222649 |
| Q9BXP5 | Serrate RNA effector molecule homolog OS=Homo sapiens OX=9606 GN=SRRT PE=1 SV=1                               | 0,163887649  | 1,221256 |
| Q2ND56 | Protein LSM14 homolog A OS=Homo sapiens OX=9606 GN=LSM14A PE=1 SV=3                                           | -0,355399577 | 1,221229 |
| P25398 | 40S ribosomal protein S12 OS=Homo sapiens OX=9606 GN=RP512 PE=1 SV=3                                          | 0,185303756  | 1,217999 |
| Q96959 | Ribosome-releasing factor 2, mitochondrial OS=Homo sapiens OX=9606 GN=GFM2 PE=1 SV=1                          | -0,220988403 | 1,217101 |
| O75146 | Huntingtin-interacting protein 1-related protein OS=Homo sapiens OX=9606 GN=HIP1R PE=1 SV=2                   | 1,755168282  | 1,217012 |
| O95644 | Nuclear factor of activated T-cells, cytoplasmic 1 OS=Homo sapiens OX=9606 GN=NFATC1 PE=1 SV=3                | -0,218730575 | 1,215693 |
| O75880 | Protein SCO1 homolog, mitochondrial OS=Homo sapiens OX=9606 GN=SCO1 PE=1 SV=1                                 | -0,551101917 | 1,215461 |
| Q9BRX2 | Protein pelota homolog OS=Homo sapiens OX=9606 GN=PELO PE=1 SV=2                                              | -0,284059453 | 1,214859 |
| Q7LBC6 | Lysine-specific demethylase 3B OS=Homo sapiens OX=9606 GN=KDM3B PE=1 SV=2                                     | -0,549752015 | 1,212909 |
| Q9NR12 | PDZ and LIM domain protein 7 OS=Homo sapiens OX=9606 GN=PLDLM7 PE=1 SV=1                                      | -0,112385074 | 1,211764 |
| P62877 | E3 ubiquitin-protein ligase RBX1 OS=Homo sapiens OX=9606 GN=RBX1 PE=1 SV=1                                    | -0,548990297 | 1,211468 |
| Q6UXH1 | Cysteine-rich with EGF-like domain protein 2 OS=Homo sapiens OX=9606 GN=CRELD2 PE=1 SV=1                      | 0,199157987  | 1,210975 |
| Q9Y243 | RAC-gamma serine/threonine-protein kinase OS=Homo sapiens OX=9606 GN=AKT3 PE=1 SV=1                           | 0,126650257  | 1,210532 |
| Q6P3X3 | Tetratricopeptide repeat protein 27 OS=Homo sapiens OX=9606 GN=TRIP2 PE=1 SV=1                                | -0,282930314 | 1,209393 |
| O43741 | 5'-AMP-activated protein kinase subunit beta-2 OS=Homo sapiens OX=9606 GN=PRKAB2 PE=1 SV=1                    | 0,351897807  | 1,208747 |
| P62906 | 60S ribosomal protein L10a OS=Homo sapiens OX=9606 GN=RPL10A PE=1 SV=2                                        | 0,140754808  | 1,20726  |
| Q9UNW1 | Multiple inositol polyphosphate phosphatase 1 OS=Homo sapiens OX=9606 GN=MINPP1 PE=1 SV=1                     | 0,183845697  | 1,20639  |
| Q8NSN7 | 39S ribosomal protein L50, mitochondrial OS=Homo sapiens OX=9606 GN=MRPL50 PE=1 SV=2                          | -0,546153898 | 1,206092 |
| Q6L8Q7 | 2',5'-phosphodiesterase 12 OS=Homo sapiens OX=9606 GN=PDE12 PE=1 SV=2                                         | -0,545801912 | 1,205424 |
| Q9NVET | Pantothenate kinase 4 OS=Homo sapiens OX=9606 GN=PANK4 PE=1 SV=1                                              | -0,282104004 | 1,205394 |
| Q9NPA8 | Transcription and mRNA export factor ENY2 OS=Homo sapiens OX=9606 GN=ENY2 PE=1 SV=1                           | -0,545228643 | 1,204336 |
| Q6UWF9 | Protein FAM180A OS=Homo sapiens OX=9606 GN=FAM180A PE=2 SV=1                                                  | 0,133117507  | 1,203273 |
| P48651 | Phosphatidylserine synthase 1 OS=Homo sapiens OX=9606 GN=PTDSS1 PE=1 SV=1                                     | 0,543410225  | 1,200879 |
| Q96BW5 | Phosphotriesterase-related protein OS=Homo sapiens OX=9606 GN=PTER PE=1 SV=1                                  | -0,543251975 | 1,200578 |
| P14927 | Cytochrome b-c1 complex subunit 7 OS=Homo sapiens OX=9606 GN=UQCRCB PE=1 SV=2                                 | -0,349502748 | 1,199738 |
| P17612 | cAMP-dependent protein kinase catalytic subunit alpha OS=Homo sapiens OX=9606 GN=PRKACA PE=1 SV=2             | -0,153167794 | 1,19847  |
| Q8IWB1 | Inositol 1,4,5-trisphosphate receptor-interacting protein OS=Homo sapiens OX=9606 GN=ITPRIP PE=1 SV=1         | -0,242040402 | 1,19818  |
| P48449 | Lanosterol synthase OS=Homo sapiens OX=9606 GN=LSS PE=1 SV=1                                                  | 0,161167432  | 1,196469 |
| O99669 | Cytochrome c oxidase subunit 6C OS=Homo sapiens OX=9606 GN=COX6C PE=1 SV=2                                    | -0,348007374 | 1,194284 |
| Q86UT6 | NLR family member X1 OS=Homo sapiens OX=9606 GN=NLRX1 PE=1 SV=1                                               | -0,251991366 | 1,191883 |
| Q15532 | Protein SSXT OS=Homo sapiens OX=9606 GN=SS18 PE=1 SV=3                                                        | -0,537690139 | 1,18997  |
| Q4J6C6 | Prolyl endopeptidase-like OS=Homo sapiens OX=9606 GN=PREPL PE=1 SV=1                                          | 0,240437896  | 1,188925 |
| P51636 | Caveolin-2 OS=Homo sapiens OX=9606 GN=CAV2 PE=1 SV=2                                                          | -0,536875591 | 1,188412 |
| Q15181 | Inorganic pyrophosphatase OS=Homo sapiens OX=9606 GN=PPA1 PE=1 SV=2                                           | -0,133395723 | 1,186538 |

|        |                                                                                                              |              |          |
|--------|--------------------------------------------------------------------------------------------------------------|--------------|----------|
| Q01484 | Ankyrin-2 OS=Homo sapiens OX=9606 GN=ANK2 PE=1 SV=4                                                          | 0,094421433  | 1,186288 |
| P09543 | 2',3'-cyclic-nucleotide 3'-phosphodiesterase OS=Homo sapiens OX=9606 GN=CNP PE=1 SV=2                        | 0,128523631  | 1,18586  |
| P36507 | Dual specificity mitogen-activated protein kinase kinase 2 OS=Homo sapiens OX=9606 GN=MAP2K2 PE=1 SV=1       | 0,15175047   | 1,184865 |
| Q5V5L9 | Striatin-interacting protein 1 OS=Homo sapiens OX=9606 GN=STRIP1 PE=1 SV=1                                   | -0,214085397 | 1,183867 |
| P06826 | Coiled-coil domain-containing protein 22 OS=Homo sapiens OX=9606 GN=CCDC22 PE=1 SV=1                         | 0,239380876  | 1,182826 |
| 115186 | C-1-tetrahydrofolate synthase, cytoplasmic OS=Homo sapiens OX=9606 GN=MTHFD1A PE=1 SV=3                      | 0,085017025  | 1,181836 |
| P00387 | NADH-cytochrome b5 reductase 3 OS=Homo sapiens OX=9606 GN=CYB5R3 PE=1 SV=3                                   | 0,123756721  | 1,180605 |
| Q9C005 | Protein dpy-30 homolog OS=Homo sapiens OX=9606 GN=DPY30 PE=1 SV=1                                            | -0,344136022 | 1,180156 |
| Q96J3  | Engulfment and cell motility protein 2 OS=Homo sapiens OX=9606 GN=ELMO2 PE=1 SV=2                            | -0,127977731 | 1,179625 |
| Q96KG9 | N-terminal kinase-like protein OS=Homo sapiens OX=9606 GN=SCYL1 PE=1 SV=1                                    | 0,102126932  | 1,177601 |
| Q95825 | Quinone oxidoreductase-like protein 1 OS=Homo sapiens OX=9606 GN=CRYZL1 PE=1 SV=2                            | -0,343377903 | 1,177388 |
| Q96KP1 | Exocyst complex component 2 OS=Homo sapiens OX=9606 GN=EXOC2 PE=1 SV=1                                       | -0,194373541 | 1,176107 |
| Q9UET6 | Putative tRNA (cytidine(32)/guanosine(34)-2'-O)-methyltransferase OS=Homo sapiens OX=9606 GN=FTSJ1 PE=1 SV=2 | 0,342725694  | 1,175007 |
| Q75223 | Gamma-glutamylcyclotransferase OS=Homo sapiens OX=9606 GN=GGCT PE=1 SV=1                                     | 0,342522115  | 1,174263 |
| O15160 | DNA-directed RNA polymerases I and III subunit RPAC1 OS=Homo sapiens OX=9606 GN=POLR1C PE=1 SV=1             | 0,342181668  | 1,17302  |
| Q94967 | WD repeat-containing protein 47 OS=Homo sapiens OX=9606 GN=WDR47 PE=1 SV=1                                   | -0,528756563 | 1,17282  |
| Q05086 | Ubiquitin-protein ligase E3A OS=Homo sapiens OX=9606 GN=UBE3A PE=1 SV=4                                      | -0,212334515 | 1,17238  |
| O75955 | Flotillin-1 OS=Homo sapiens OX=9606 GN=FLT1 PE=1 SV=3                                                        | 0,212307677  | 1,172204 |
| Q96DB5 | Regulator of microtubule dynamics protein 1 OS=Homo sapiens OX=9606 GN=RMDN1 PE=1 SV=1                       | 0,158430502  | 1,171667 |
| Q9V547 | Intraflagellar transport protein 25 homolog OS=Homo sapiens OX=9606 GN=HSPB11 PE=1 SV=1                      | 0,52812315   | 1,171599 |
| P30530 | Tyrosine-protein kinase receptor UFO OS=Homo sapiens OX=9606 GN=AXL PE=1 SV=4                                | 0,341349453  | 1,16998  |
| O75179 | Ankyrin repeat domain-containing protein 17 OS=Homo sapiens OX=9606 GN=ANKRD17 PE=1 SV=3                     | -0,722182584 | 1,169799 |
| Q92819 | Hyaluronan synthase 2 OS=Homo sapiens OX=9606 GN=HAS2 PE=1 SV=1                                              | -0,723868462 | 1,169672 |
| Q96FV9 | THO complex subunit 1 OS=Homo sapiens OX=9606 GN=THOC1 PE=1 SV=1                                             | -0,365232699 | 1,168963 |
| Q9NX55 | Huntingtin-interacting protein K OS=Homo sapiens OX=9606 GN=HYPK PE=1 SV=2                                   | -0,526199646 | 1,167887 |
| P35269 | General transcription factor IIF subunit 1 OS=Homo sapiens OX=9606 GN=GTF2F1 PE=1 SV=2                       | -0,193135976 | 1,167125 |
| Q13427 | Peptidyl-prolyl cis-trans isomerase G OS=Homo sapiens OX=9606 GN=PPIG PE=1 SV=1                              | -0,525361681 | 1,166267 |
| Q9P253 | Vacuolar protein sorting-associated protein 18 homolog OS=Homo sapiens OX=9606 GN=VPS18 PE=1 SV=2            | 0,192919281  | 1,165554 |
| Q8IWR0 | Zinc finger CCH domain-containing protein 7A OS=Homo sapiens OX=9606 GN=ZC3H7A PE=1 SV=1                     | -0,524866055 | 1,165309 |
| Q6IA86 | Elongator complex protein 2 OS=Homo sapiens OX=9606 GN=ELP2 PE=1 SV=2                                        | 0,273360169  | 1,163149 |
| Q6GMV2 | SET and MYND domain-containing protein 5 OS=Homo sapiens OX=9606 GN=SMYD5 PE=1 SV=2                          | -0,27317937  | 1,162277 |
| Q9NU11 | Peroxisomal 2,4-dienoyl-CoA reductase OS=Homo sapiens OX=9606 GN=DECR2 PE=1 SV=1                             | -0,523285107 | 1,162249 |
| Q13188 | Serine/threonine-protein kinase 3 OS=Homo sapiens OX=9606 GN=STK3 PE=1 SV=2                                  | -0,195873262 | 1,161086 |
| Q6Q759 | Sperm-associated antigen 17 OS=Homo sapiens OX=9606 GN=SPAG17 PE=2 SV=1                                      | 0,522005982  | 1,15977  |
| Q9UHD2 | Serine/threonine-protein kinase TBK1 OS=Homo sapiens OX=9606 GN=TBK1 PE=1 SV=1                               | 0,521873774  | 1,159514 |
| O94905 | Erlin-2 OS=Homo sapiens OX=9606 GN=ERLIN2 PE=1 SV=1                                                          | 0,157045954  | 1,159174 |
| Q9P258 | Protein RCC2 OS=Homo sapiens OX=9606 GN=RCC2 PE=1 SV=2                                                       | -0,177862094 | 1,159032 |
| Q15555 | Microtubule-associated protein RP/EB family member 2 OS=Homo sapiens OX=9606 GN=MAPRE2 PE=1 SV=1             | 0,351959603  | 1,158915 |
| P09661 | U2 small nuclear ribonucleoprotein A' OS=Homo sapiens OX=9606 GN=SNRPA1 PE=1 SV=2                            | 0,210219286  | 1,158533 |
| Q96HH9 | GRAM domain-containing protein 2B OS=Homo sapiens OX=9606 GN=GRAMD2B PE=1 SV=1                               | -0,33813428  | 1,158233 |
| Q9UKI2 | Cdc42 effector protein 3 OS=Homo sapiens OX=9606 GN=CDC42EP3 PE=1 SV=1                                       | 0,210137149  | 1,157995 |
| Q02539 | Histone H1.1 OS=Homo sapiens OX=9606 GN=HIST1H1A PE=1 SV=3                                                   | -0,181653122 | 1,156802 |
| P05114 | Non-histone chromosomal protein HMG-14 OS=Homo sapiens OX=9606 GN=HMGN1 PE=1 SV=3                            | 0,271837461  | 1,155806 |
| Q14573 | Inositol 1,4,5-trisphosphate receptor type 3 OS=Homo sapiens OX=9606 GN=ITPR3 PE=1 SV=2                      | -0,141756153 | 1,154832 |
| P17252 | Protein kinase C alpha type OS=Homo sapiens OX=9606 GN=PRKCA PE=1 SV=4                                       | 0,12561247   | 1,152727 |
| Q63HN8 | E3 ubiquitin-protein ligase RNF213 OS=Homo sapiens OX=9606 GN=RNF213 PE=1 SV=3                               | 0,191139483  | 1,152668 |
| P24386 | Rab proteins geranylgeranyltransferase component A 1 OS=Homo sapiens OX=9606 GN=CHM PE=1 SV=3                | 0,559849905  | 1,1516   |
| P34741 | Syndecan-2 OS=Homo sapiens OX=9606 GN=SDC2 PE=1 SV=2                                                         | 0,336216392  | 1,151223 |
| P25788 | Proteasome subunit alpha type-3 OS=Homo sapiens OX=9606 GN=PSMA3 PE=1 SV=2                                   | -0,148220171 | 1,151166 |
| P36551 | Oxygen-dependent coproporphyrinogen-III oxidase, mitochondrial OS=Homo sapiens OX=9606 GN=CPOX PE=1 SV=3     | 0,517376218  | 1,150775 |
| Q9BP27 | Target of rapamycin complex 2 subunit MAPKAP1 OS=Homo sapiens OX=9606 GN=MAPKAP1 PE=1 SV=2                   | -0,468117155 | 1,150155 |
| P30501 | HLA class I histocompatibility antigen, Cw-2 alpha chain OS=Homo sapiens OX=9606 GN=HLA-C PE=1 SV=1          | -0,335385412 | 1,148185 |
| O75787 | Renin receptor OS=Homo sapiens OX=9606 GN=ATP6A2 PE=1 SV=2                                                   | 0,395530226  | 1,147518 |
| P15927 | Replication protein A 32 kDa subunit OS=Homo sapiens OX=9606 GN=RPA2 PE=1 SV=1                               | 0,334965617  | 1,14665  |
| Q32C08 | Mitochondrial import inner membrane translocase subunit TIM50 OS=Homo sapiens OX=9606 GN=TIMM50 PE=1 SV=2    | -0,23283928  | 1,145192 |
| P51808 | Dynein light chain Tctex-type 3 OS=Homo sapiens OX=9606 GN=DYNLT3 PE=1 SV=1                                  | -0,26952454  | 1,14466  |
| Q9Y3X0 | Coiled-coil domain-containing protein 9 OS=Homo sapiens OX=9606 GN=CCDC9 PE=1 SV=1                           | -0,513762686 | 1,143729 |
| Q9UHH9 | SUN domain-containing protein 2 OS=Homo sapiens OX=9606 GN=SUN2 PE=1 SV=3                                    | -0,155293444 | 1,143412 |
| P57088 | Transmembrane protein 33 OS=Homo sapiens OX=9606 GN=TMEM33 PE=1 SV=2                                         | -0,269169674 | 1,14295  |
| Q8Q5V6 | Dynein assembly factor 5, axonemal OS=Homo sapiens OX=9606 GN=DNAAF5 PE=1 SV=4                               | -0,333571143 | 1,14155  |
| Q12792 | Twinfilin-1 OS=Homo sapiens OX=9606 GN=TFW1 PE=1 SV=3                                                        | 0,140367138  | 1,14096  |
| P82673 | 28S ribosomal protein S35, mitochondrial OS=Homo sapiens OX=9606 GN=MRPS35 PE=1 SV=1                         | 0,33272148   | 1,138442 |
| Q96C90 | Protein phosphatase 1 regulatory subunit 14B OS=Homo sapiens OX=9606 GN=PPP1R14B PE=1 SV=3                   | -0,268116904 | 1,137881 |
| P25789 | Proteasome subunit alpha type-4 OS=Homo sapiens OX=9606 GN=PSMA4 PE=1 SV=1                                   | -0,14679489  | 1,137636 |
| P28290 | Protein ITPRID2 OS=Homo sapiens OX=9606 GN=ITPRID2 PE=1 SV=3                                                 | 0,510630016  | 1,137602 |
| Q9Y295 | Developmentally-regulated GTP-binding protein 1 OS=Homo sapiens OX=9606 GN=DRG1 PE=1 SV=1                    | 0,154600464  | 1,137195 |
| Q5JT86 | Placenta-specific protein 9 OS=Homo sapiens OX=9606 GN=PLAC9 PE=1 SV=1                                       | 0,510026565  | 1,13642  |
| Q9H019 | Mitochondrial fission regulator 1-like OS=Homo sapiens OX=9606 GN=MTFR1L PE=1 SV=2                           | 0,509808541  | 1,135993 |
| P26640 | Valine-tRNA ligase OS=Homo sapiens OX=9606 GN=VARS PE=1 SV=4                                                 | 0,078664796  | 1,133922 |
| P54821 | Paired mesoderm homeobox protein 1 OS=Homo sapiens OX=9606 GN=PRRX1 PE=1 SV=2                                | 0,508605491  | 1,133634 |
| P32321 | Deoxycytidylate deaminase OS=Homo sapiens OX=9606 GN=DCTD PE=1 SV=2                                          | -0,230592428 | 1,132311 |
| Q9P265 | Disco-interacting protein 2 homolog B OS=Homo sapiens OX=9606 GN=DIP2B PE=1 SV=3                             | -0,330780845 | 1,131343 |
| Q9P016 | Thymocyte nuclear protein 1 OS=Homo sapiens OX=9606 GN=THYN1 PE=1 SV=1                                       | -0,507366224 | 1,131201 |
| O43505 | Beta-1,4-glucuronyltransferase 1 OS=Homo sapiens OX=9606 GN=B4GAT1 PE=1 SV=1                                 | 0,507087491  | 1,130653 |
| Q96AY3 | Peptidyl-prolyl cis-trans isomerase FKBP10 OS=Homo sapiens OX=9606 GN=FKBP10 PE=1 SV=1                       | -0,087663045 | 1,130235 |
| Q92600 | CCR4-NOT transcription complex subunit 9 OS=Homo sapiens OX=9606 GN=CNOT9 PE=1 SV=1                          | 0,646286052  | 1,129145 |
| P34059 | N-acetylgalactosamine-6-sulfatase OS=Homo sapiens OX=9606 GN=GALNS PE=1 SV=1                                 | -0,329782831 | 1,127691 |
| P62273 | 40S ribosomal protein S29 OS=Homo sapiens OX=9606 GN=RPS29 PE=1 SV=2                                         | -0,265907845 | 1,127252 |
| Q9V6M5 | Zinc transporter 1 OS=Homo sapiens OX=9606 GN=SLC30A1 PE=1 SV=3                                              | -0,205366549 | 1,126889 |
| Q8NBN3 | Transmembrane protein 87A OS=Homo sapiens OX=9606 GN=TMEM87A PE=1 SV=3                                       | 0,32955165   | 1,126784 |
| Q9Y211 | Nischarin OS=Homo sapiens OX=9606 GN=NISCH PE=1 SV=3                                                         | -0,194151139 | 1,125889 |
| O60443 | Gasdermin-E OS=Homo sapiens OX=9606 GN=GSDME PE=1 SV=2                                                       | -0,229445576 | 1,125746 |
| P48061 | Stromal cell-derived factor 1 OS=Homo sapiens OX=9606 GN=CXCL12 PE=1 SV=1                                    | 0,504451945  | 1,12547  |
| Q96J02 | E3 ubiquitin-protein ligase Itchy homolog OS=Homo sapiens OX=9606 GN=ITCH PE=1 SV=2                          | -0,187315475 | 1,125093 |
| Q9Y399 | 28S ribosomal protein S2, mitochondrial OS=Homo sapiens OX=9606 GN=MRPS2 PE=1 SV=1                           | -0,328521272 | 1,123074 |
| Q9UHQ4 | B-cell receptor-associated protein 29 OS=Homo sapiens OX=9606 GN=BCAP29 PE=1 SV=2                            | 0,228593918  | 1,120874 |
| Q8WXF7 | Atlastin-1 OS=Homo sapiens OX=9606 GN=ATL1 PE=1 SV=1                                                         | 0,327885539  | 1,120747 |
| Q9NYJ8 | TGF-beta-activated kinase 1 and MAP3K7-binding protein 2 OS=Homo sapiens OX=9606 GN=TAB2 PE=1 SV=1           | 0,918845737  | 1,120345 |
| P62879 | Guanine nucleotide-binding protein G(I)/G(S)/G(T) subunit beta-2 OS=Homo sapiens OX=9606 GN=GNB2 PE=1 SV=3   | 0,327481512  | 1,119268 |
| Q9Y2K2 | Serine/threonine-protein kinase SIK3 OS=Homo sapiens OX=9606 GN=SIK3 PE=1 SV=4                               | 0,505750983  | 1,119121 |
| P27658 | Collagen alpha-1(VIII) chain OS=Homo sapiens OX=9606 GN=COL8A1 PE=1 SV=2                                     | 0,3272974    | 1,118594 |
| Q13541 | Eukaryotic translation initiation factor 4E-binding protein 1 OS=Homo sapiens OX=9606 GN=EIF4EBP1 PE=1 SV=3  | -0,327185056 | 1,118183 |
| P40261 | Nicotinamide N-methyltransferase OS=Homo sapiens OX=9606 GN=NNMT PE=1 SV=1                                   | 0,138059171  | 1,118016 |
| Q9BTE3 | Mini-chromosome maintenance complex-binding protein OS=Homo sapiens OX=9606 GN=MCMBP PE=1 SV=2               | 0,500116788  | 1,116917 |
| Q9H2D6 | TRIO and F-actin-binding protein OS=Homo sapiens OX=9606 GN=TRIOBP PE=1 SV=3                                 | 0,122425647  | 1,116777 |
| Q15843 | NEDD8 OS=Homo sapiens OX=9606 GN=NEDD8 PE=1 SV=1                                                             | -0,263722918 | 1,116747 |
| P48506 | Glutamate--cysteine ligase catalytic subunit OS=Homo sapiens OX=9606 GN=GCLC PE=1 SV=2                       | 0,499838877  | 1,116367 |
| Q9H553 | Alpha-1,3/1,6-mannosyltransferase ALG2 OS=Homo sapiens OX=9606 GN=ALG2 PE=1 SV=1                             | -0,227762804 | 1,116124 |

|         |                                                                                                                    |              |          |
|---------|--------------------------------------------------------------------------------------------------------------------|--------------|----------|
| Q9Y697  | Cysteine desulfurase, mitochondrial OS=Homo sapiens OX=9606 GN=NFS1 PE=1 SV=3                                      | 0,263591911  | 1,116118 |
| Q13951  | Core-binding factor subunit beta OS=Homo sapiens OX=9606 GN=CBFB PE=1 SV=2                                         | 0,326554875  | 1,115876 |
| Q9UL45  | Biogenesis of lysosome-related organelles complex 1 subunit 6 OS=Homo sapiens OX=9606 GN=BLOC156 PE=1 SV=1         | 0,499192927  | 1,115709 |
| P17405  | Sphingomyelin phosphodiesterase OS=Homo sapiens OX=9606 GN=SMPD1 PE=1 SV=5                                         | 0,227477064  | 1,114491 |
| Q99733  | Nucleosome assembly protein 1-like 4 OS=Homo sapiens OX=9606 GN=NAP1L4 PE=1 SV=1                                   | -0,161134209 | 1,114137 |
| Q9H9A5  | CCR4-NOT transcription complex subunit 10 OS=Homo sapiens OX=9606 GN=CCNOT10 PE=1 SV=1                             | -0,49773599  | 1,112206 |
| O15446  | DNA-directed RNA polymerase I subunit RPA34 OS=Homo sapiens OX=9606 GN=CD3EAP PE=1 SV=1                            | 0,175506626  | 1,112202 |
| P14854  | Cytochrome c oxidase subunit 6B1 OS=Homo sapiens OX=9606 GN=COX6B1 PE=1 SV=2                                       | -0,227004901 | 1,111794 |
| Q9NV79  | Armadillo repeat-containing protein 1 OS=Homo sapiens OX=9606 GN=ARMC1 PE=1 SV=1                                   | 0,49673442   | 1,110221 |
| Q08170  | Serine/arginine-rich splicing factor 4 OS=Homo sapiens OX=9606 GN=SRSF4 PE=1 SV=2                                  | 0,092897413  | 1,109892 |
| P49674  | Casein kinase I isoform epsilon OS=Homo sapiens OX=9606 GN=CSNK1E PE=1 SV=1                                        | -0,365411738 | 1,109057 |
| Q9H7D0  | Dedicator of cytokinesis protein 5 OS=Homo sapiens OX=9606 GN=DOCK5 PE=1 SV=3                                      | -0,107471746 | 1,108749 |
| Q96CP2  | FLYWCH family member 2 OS=Homo sapiens OX=9606 GN=FLYWCH2 PE=1 SV=1                                                | 0,495969923  | 1,108705 |
| Q16531  | DNA damage-binding protein 1 OS=Homo sapiens OX=9606 GN=DDB1 PE=1 SV=1                                             | -0,082051483 | 1,10853  |
| Q3LXA3  | Triokinase/FMN cyclase OS=Homo sapiens OX=9606 GN=TKFC PE=1 SV=2                                                   | 0,202502366  | 1,108296 |
| Q9Y512  | Sorting and assembly machinery component 50 homolog OS=Homo sapiens OX=9606 GN=SAMM50 PE=1 SV=3                    | -0,160331431 | 1,107417 |
| P18847  | Cyclic AMP-dependent transcription factor ATF-3 OS=Homo sapiens OX=9606 GN=ATF3 PE=1 SV=2                          | 0,302394081  | 1,106477 |
| Q9H9T3  | Elongator complex protein 3 OS=Homo sapiens OX=9606 GN=ELP3 PE=1 SV=2                                              | -0,323752109 | 1,105613 |
| Q9H0V9  | VIP36-like protein OS=Homo sapiens OX=9606 GN=LMAN2L PE=1 SV=1                                                     | 0,225857516  | 1,105246 |
| P61599  | N-alpha-acetyltransferase 20 OS=Homo sapiens OX=9606 GN=NAA20 PE=1 SV=1                                            | -0,499394568 | 1,104686 |
| P10599  | Thioredoxin OS=Homo sapiens OX=9606 GN=TXN PE=1 SV=3                                                               | -0,184429547 | 1,104382 |
| P02458  | Collagen alpha-1(I) chain OS=Homo sapiens OX=9606 GN=COL2A1 PE=1 SV=3                                              | -0,201491023 | 1,101745 |
| P24752  | Acetyl-CoA acetyltransferase, mitochondrial OS=Homo sapiens OX=9606 GN=ACAT1 PE=1 SV=1                             | -0,121061669 | 1,101494 |
| Q53TN4  | Cytochrome b reductase 1 OS=Homo sapiens OX=9606 GN=CYBRD1 PE=1 SV=1                                               | -0,492150559 | 1,101116 |
| Q13428  | Treacle protein OS=Homo sapiens OX=9606 GN=TCOF1 PE=1 SV=3                                                         | 0,260241862  | 1,100032 |
| P49747  | Cartilage oligomeric matrix protein OS=Homo sapiens OX=9606 GN=COMP PE=1 SV=2                                      | -0,224921574 | 1,099908 |
| Q9Y899  | Uncharacterized protein KIAA1671 OS=Homo sapiens OX=9606 GN=KIAA1671 PE=1 SV=2                                     | -0,072690013 | 1,09841  |
| Q72627  | E3 ubiquitin-protein ligase HUWE1 OS=Homo sapiens OX=9606 GN=HUWE1 PE=1 SV=3                                       | -0,065502615 | 1,09782  |
| Q16659  | Mitogen-activated protein kinase 6 OS=Homo sapiens OX=9606 GN=MAPK6 PE=1 SV=1                                      | 0,490119657  | 1,09707  |
| Q86VX2  | COMM domain-containing protein 7 OS=Homo sapiens OX=9606 GN=COMM7 PE=1 SV=2                                        | -0,253501443 | 1,096868 |
| Q9UII2  | ATPase inhibitor, mitochondrial OS=Homo sapiens OX=9606 GN=ATP5IF1 PE=1 SV=1                                       | -0,489936193 | 1,096704 |
| P52179  | Myomesin-1 OS=Homo sapiens OX=9606 GN=MYOM1 PE=1 SV=2                                                              | 0,489777068  | 1,096387 |
| P18754  | Regulator of chromosome condensation OS=Homo sapiens OX=9606 GN=RCC1 PE=1 SV=1                                     | 0,321226391  | 1,09362  |
| Q86Y82  | Syntaxin-12 OS=Homo sapiens OX=9606 GN=STX12 PE=1 SV=1                                                             | 0,149819571  | 1,094553 |
| P33176  | Kinesin-1 heavy chain OS=Homo sapiens OX=9606 GN=KIF5B PE=1 SV=1                                                   | -0,063394    | 1,094354 |
| Q9NP80  | Calcium-independent phospholipase A2-gamma OS=Homo sapiens OX=9606 GN=PNPLA8 PE=1 SV=1                             | 0,352555308  | 1,093591 |
| Q96D17  | U5 small nuclear ribonucleoprotein 40 kDa protein OS=Homo sapiens OX=9606 GN=SNRNP40 PE=1 SV=1                     | -0,223670209 | 1,092779 |
| P10398  | Serine/threonine-protein kinase A-Raf OS=Homo sapiens OX=9606 GN=ARAF PE=1 SV=2                                    | -0,592878867 | 1,092284 |
| Q04917  | 14-3-3 protein eta OS=Homo sapiens OX=9606 GN=YWHAH PE=1 SV=4                                                      | 0,12462128   | 1,091183 |
| Q9B0A9  | Cytochrome b-245 chaperone 1 OS=Homo sapiens OX=9606 GN=CYBC1 PE=1 SV=1                                            | 0,31956802   | 1,090286 |
| P86791  | Vacuolar fusion protein CCZ1 homolog OS=Homo sapiens OX=9606 GN=CCZ1 PE=1 SV=1                                     | 0,617681101  | 1,089333 |
| Q92620  | Pre-mRNA-splicing factor ATP-dependent RNA helicase PRP16 OS=Homo sapiens OX=9606 GN=DHX38 PE=1 SV=2               | 0,199485686  | 1,088781 |
| Q9C011  | Myotubularin-related protein 12 OS=Homo sapiens OX=9606 GN=MTMR12 PE=1 SV=2                                        | 0,146225951  | 1,088698 |
| P48637  | Glutathione synthetase OS=Homo sapiens OX=9606 GN=GSS PE=1 SV=1                                                    | -0,135037057 | 1,088171 |
| Q6IEE8  | Schlafen family member 12-like OS=Homo sapiens OX=9606 GN=SLFN12L PE=2 SV=4                                        | -0,657033534 | 1,088143 |
| Q72275  | TRMT1-like protein OS=Homo sapiens OX=9606 GN=TRMT1L PE=1 SV=2                                                     | 0,967187513  | 1,087321 |
| Q14847  | LIM and SH3 domain protein 1 OS=Homo sapiens OX=9606 GN=LASP1 PE=1 SV=2                                            | 0,100309957  | 1,086031 |
| Q8NCCH0 | Carbohydrate sulfotransferase 14 OS=Homo sapiens OX=9606 GN=CHST14 PE=1 SV=2                                       | 0,484309747  | 1,085456 |
| Q15050  | Ribosome biogenesis regulatory protein homolog OS=Homo sapiens OX=9606 GN=RRS1 PE=1 SV=2                           | 0,222360954  | 1,085328 |
| Q969J3  | BLOC-1-related complex subunit 5 OS=Homo sapiens OX=9606 GN=BORCS5 PE=1 SV=1                                       | -0,367442895 | 1,083503 |
| Q9HD15  | Steroid receptor RNA activator 1 OS=Homo sapiens OX=9606 GN=SRA1 PE=1 SV=1                                         | 0,221856795  | 1,082462 |
| Q9NUP1  | Biogenesis of lysosome-related organelles complex 1 subunit 4 OS=Homo sapiens OX=9606 GN=BLOC154 PE=1 SV=1         | 0,055967348  | 1,082359 |
| Q13162  | Peroxiredoxin-4 OS=Homo sapiens OX=9606 GN=PRDX4 PE=1 SV=1                                                         | 0,140835911  | 1,081551 |
| P60891  | Ribose-phosphate pyrophosphokinase 1 OS=Homo sapiens OX=9606 GN=PRPS1 PE=1 SV=2                                    | 0,198328768  | 1,081315 |
| Q9UNF1  | Melanoma-associated antigen D2 OS=Homo sapiens OX=9606 GN=MAGED2 PE=1 SV=2                                         | 0,108308689  | 1,081013 |
| P51648  | Aldehyde dehydrogenase family 3 member A2 OS=Homo sapiens OX=9606 GN=ALDH3A2 PE=1 SV=1                             | 0,140747613  | 1,080726 |
| Q13523  | Serine/threonine-protein kinase PRP4 homolog OS=Homo sapiens OX=9606 GN=PRPF4B PE=1 SV=3                           | -0,481719457 | 1,08026  |
| Q8W7W3  | Conserved oligomeric Golgi complex subunit 1 OS=Homo sapiens OX=9606 GN=COG1 PE=1 SV=1                             | 0,316205084  | 1,077963 |
| P11802  | Cyclin-dependent kinase 4 OS=Homo sapiens OX=9606 GN=CDK4 PE=1 SV=2                                                | -0,376791228 | 1,077017 |
| P10606  | Cytochrome c oxidase subunit 5B, mitochondrial OS=Homo sapiens OX=9606 GN=COX5B PE=1 SV=2                          | -0,255407123 | 1,076861 |
| Q13045  | Protein flightless-1 homolog OS=Homo sapiens OX=9606 GN=FLII PE=1 SV=2                                             | 0,089148618  | 1,076238 |
| Q96HD1  | Cysteine-rich with EGF-like domain protein 1 OS=Homo sapiens OX=9606 GN=CRELD1 PE=1 SV=3                           | 0,255036599  | 1,075087 |
| P11940  | Polyadenylate-binding protein 1 OS=Homo sapiens OX=9606 GN=PABPC1 PE=1 SV=2                                        | 0,114621975  | 1,074049 |
| Q13443  | Sintaxin-16 and metalloproteinase domain-containing protein 9 OS=Homo sapiens OX=9606 GN=ADAM9 PE=1 SV=1           | 0,220283747  | 1,073525 |
| Q13555  | Calcium/calmodulin-dependent protein kinase type II subunit gamma OS=Homo sapiens OX=9606 GN=CAMK2G PE=1 SV=4      | -0,314700207 | 1,072447 |
| Q9P225  | Dynein heavy chain 2, axonemal OS=Homo sapiens OX=9606 GN=DNAH2 PE=2 SV=3                                          | 0,934752291  | 1,071827 |
| P23743  | Dialcylglycerol kinase alpha OS=Homo sapiens OX=9606 GN=DGKA PE=1 SV=3                                             | -0,166636811 | 1,071455 |
| Q92542  | Nicastrin OS=Homo sapiens OX=9606 GN=NCSTN PE=1 SV=2                                                               | -0,314159155 | 1,070464 |
| Q727K0  | COX assembly mitochondrial protein homolog OS=Homo sapiens OX=9606 GN=CMC1 PE=1 SV=1                               | 0,476481772  | 1,069717 |
| O94992  | Protein HEXIM1 OS=Homo sapiens OX=9606 GN=HEXIM1 PE=1 SV=1                                                         | -0,476234297 | 1,069218 |
| O14617  | AP-3 complex subunit delta-1 OS=Homo sapiens OX=9606 GN=AP3D1 PE=1 SV=1                                            | -0,104329687 | 1,068923 |
| P51580  | Thiopurine S-methyltransferase OS=Homo sapiens OX=9606 GN=TPMT PE=1 SV=1                                           | 0,166182657  | 1,067948 |
| Q8N2F6  | Armadillo repeat-containing protein 10 OS=Homo sapiens OX=9606 GN=ARMC10 PE=1 SV=1                                 | 0,475119487  | 1,066967 |
| Q9NNW5  | WD repeat-containing protein 6 OS=Homo sapiens OX=9606 GN=WDR6 PE=1 SV=1                                           | 0,219038953  | 1,066462 |
| O75381  | Peroxisomal membrane protein PEX14 OS=Homo sapiens OX=9606 GN=PEX14 PE=1 SV=1                                      | 0,179088131  | 1,066283 |
| P24043  | Laminin subunit alpha-2 OS=Homo sapiens OX=9606 GN=LAMA2 PE=1 SV=4                                                 | 0,474530179  | 1,065776 |
| Q641Q2  | WASH complex subunit 2A OS=Homo sapiens OX=9606 GN=WASHC2A PE=1 SV=3                                               | 0,357744744  | 1,065159 |
| Q8N7H5  | RNA polymerase II-associated factor 1 homolog OS=Homo sapiens OX=9606 GN=PAF1 PE=1 SV=2                            | 0,312298967  | 1,063644 |
| Q6P3W7  | SCY1-like protein 2 OS=Homo sapiens OX=9606 GN=SCYL2 PE=1 SV=1                                                     | 0,178710338  | 1,063603 |
| O14662  | Syntaxin-16 OS=Homo sapiens OX=9606 GN=STX16 PE=1 SV=3                                                             | -0,473150139 | 1,062986 |
| Q9Y552  | Serine/threonine-protein kinase MRCK beta OS=Homo sapiens OX=9606 GN=CDC42BPB PE=1 SV=2                            | 0,098476509  | 1,061613 |
| O57475  | PC4 and SFRS1-interacting protein OS=Homo sapiens OX=9606 GN=PSIP1 PE=1 SV=1                                       | -0,252212999 | 1,061581 |
| P34949  | Mannose-6-phosphate isomerase OS=Homo sapiens OX=9606 GN=MPI PE=1 SV=2                                             | 0,195257526  | 1,061548 |
| Q13616  | Cullin-1 OS=Homo sapiens OX=9606 GN=CUL1 PE=1 SV=2                                                                 | 0,138675911  | 1,061414 |
| Q43181  | NADH dehydrogenase [ubiquinone] iron-sulfur protein 4, mitochondrial OS=Homo sapiens OX=9606 GN=NDUF54 PE=1 SV=1   | -0,311688817 | 1,061407 |
| Q86VR2  | Reticulophagy regulator 3 OS=Homo sapiens OX=9606 GN=RETREG3 PE=1 SV=1                                             | 0,218025455  | 1,060711 |
| Q96005  | Cleft lip and palate transmembrane protein 1 OS=Homo sapiens OX=9606 GN=CLPTM1 PE=1 SV=1                           | 0,165244535  | 1,060711 |
| Q8WUW0  | Nuclear pore complex protein Nup133 OS=Homo sapiens OX=9606 GN=NUP133 PE=1 SV=2                                    | -0,145980979 | 1,060632 |
| O43583  | Density-regulated protein OS=Homo sapiens OX=9606 GN=DENR PE=1 SV=2                                                | -0,194936207 | 1,059484 |
| P55884  | Eukaryotic translation initiation factor 3 subunit B OS=Homo sapiens OX=9606 GN=EIF3B PE=1 SV=3                    | -0,080395152 | 1,059252 |
| O75792  | Ribonuclease H2 subunit A OS=Homo sapiens OX=9606 GN=RNASEH2A PE=1 SV=2                                            | -0,471117194 | 1,058869 |
| Q965U4  | Oxysteroid-binding protein-related protein 9 OS=Homo sapiens OX=9606 GN=OSBPL9 PE=1 SV=2                           | -0,310304056 | 1,05633  |
| Q96P50  | Arf-GAP with coiled-coil, ANK repeat and PH domain-containing protein 3 OS=Homo sapiens OX=9606 GN=ACAP3 PE=1 SV=2 | 0,29207527   | 1,056239 |
| Q9Y478  | 5'-AMP-activated protein kinase subunit beta-1 OS=Homo sapiens OX=9606 GN=PRKAB1 PE=1 SV=4                         | 0,108962926  | 1,056117 |
| O95967  | EGF-containing fibulin-like extracellular matrix protein 2 OS=Homo sapiens OX=9606 GN=EFEMP2 PE=1 SV=3             | 0,217197657  | 1,056029 |
| Q9UHV9  | Prefoldin subunit 2 OS=Homo sapiens OX=9606 GN=PFN2 PE=1 SV=1                                                      | 0,194322461  | 1,055544 |
| P62424  | 60S ribosomal protein L7a OS=Homo sapiens OX=9606 GN=RPL7A PE=1 SV=2                                               | -0,112966618 | 1,055061 |
| Q9HAV0  | Guanine nucleotide-binding protein subunit beta-4 OS=Homo sapiens OX=9606 GN=GNB4 PE=1 SV=3                        | 0,137890674  | 1,054119 |

|            |                                                                                                                    |              |          |
|------------|--------------------------------------------------------------------------------------------------------------------|--------------|----------|
| Q9UKF6     | Cleavage and polyadenylation specificity factor subunit 3 OS=Homo sapiens OX=9606 GN=CPSF3 PE=1 SV=1               | 0,309515879  | 1,05344  |
| Q6A108     | HEAT repeat-containing protein 6 OS=Homo sapiens OX=9606 GN=HEATR6 PE=1 SV=1                                       | 0,042628893  | 1,052237 |
| P17900     | Ganglioside GM2 activator OS=Homo sapiens OX=9606 GN=GM2A PE=1 SV=4                                                | 0,467385854  | 1,051295 |
| P32456     | Guanylate-binding protein 2 OS=Homo sapiens OX=9606 GN=GBP2 PE=1 SV=3                                              | -0,216360083 | 1,051289 |
| Q9GZ8N     | UF0F087 protein C20orf27 OS=Homo sapiens OX=9606 GN=C20orf27 PE=1 SV=3                                             | -0,109079258 | 1,050741 |
| Q8IVF7     | Formin-like protein 3 OS=Homo sapiens OX=9606 GN=FMNL3 PE=1 SV=3                                                   | -0,607750363 | 1,050722 |
| Q15819     | Ubiquitin-conjugating enzyme E2 variant 2 OS=Homo sapiens OX=9606 GN=UBE2V2 PE=1 SV=4                              | -0,249854384 | 1,050313 |
| Q96ER9     | Coiled-coil domain-containing protein 51 OS=Homo sapiens OX=9606 GN=CCDC51 PE=1 SV=2                               | -0,182369678 | 1,049439 |
| Q13228     | Methanethiol oxidase OS=Homo sapiens OX=9606 GN=SELENBP1 PE=1 SV=2                                                 | -0,11623014  | 1,048956 |
| A0A0U1RRL7 | Protein MMP24OS OS=Homo sapiens OX=9606 GN=MMP24OS PE=1 SV=1                                                       | -0,466154387 | 1,04879  |
| P50552     | Vasodilator-stimulated phosphoprotein OS=Homo sapiens OX=9606 GN=VASP PE=1 SV=3                                    | 0,108829096  | 1,048082 |
| Q9Y6Y8     | SEC23-interacting protein OS=Homo sapiens OX=9606 GN=SEC23IP PE=1 SV=1                                             | 0,11621539   | 1,047691 |
| Q9UL15     | BAG family molecular chaperone regulator 5 OS=Homo sapiens OX=9606 GN=BAG5 PE=1 SV=1                               | 0,215644104  | 1,04724  |
| Q8WXA9     | Splicing regulatory glutamine/lysine-rich protein 1 OS=Homo sapiens OX=9606 GN=SREK1 PE=1 SV=1                     | 0,307689789  | 1,046744 |
| Q15477     | Helicase SKI2W OS=Homo sapiens OX=9606 GN=SKI2L PE=1 SV=3                                                          | -0,130628818 | 1,045044 |
| P55084     | Trifunctional enzyme subunit beta, mitochondrial OS=Homo sapiens OX=9606 GN=HADHB PE=1 SV=3                        | -0,102409816 | 1,044805 |
| Q9NXU5     | ADP-ribosylation factor-like protein 15 OS=Homo sapiens OX=9606 GN=ARL15 PE=1 SV=1                                 | -0,462590524 | 1,044161 |
| O75131     | Copine-3 OS=Homo sapiens OX=9606 GN=CPNE3 PE=1 SV=1                                                                | 0,111983623  | 1,043833 |
| Q5MNZ9     | WD repeat domain phosphoinositide-interacting protein 1 OS=Homo sapiens OX=9606 GN=WIP1 PE=1 SV=3                  | 0,463540101  | 1,043463 |
| Q8N128     | Protein FAM177A1 OS=Homo sapiens OX=9606 GN=FAM177A1 PE=1 SV=1                                                     | -0,463526579 | 1,043436 |
| Q8N392     | Rho GTPase-activating protein 18 OS=Homo sapiens OX=9606 GN=ARHGAP18 PE=1 SV=3                                     | 0,143988183  | 1,043133 |
| P62714     | Serine/threonine-protein phosphatase 2A catalytic subunit beta isoform OS=Homo sapiens OX=9606 GN=PPP2CB PE=1 SV=1 | -0,115796566 | 1,043078 |
| P12814     | Alpha-actinin-1 OS=Homo sapiens OX=9606 GN=ACTN1 PE=1 SV=2                                                         | -0,053625426 | 1,042676 |
| Q08623     | Pseudouridine-5'-phosphatase OS=Homo sapiens OX=9606 GN=PUDP PE=1 SV=3                                             | 0,120865291  | 1,04177  |
| Q9V6B7     | AP-4 complex subunit beta-1 OS=Homo sapiens OX=9606 GN=AP4B1 PE=1 SV=2                                             | 0,18330568   | 1,041047 |
| P60981     | Destrin OS=Homo sapiens OX=9606 GN=DSTN PE=1 SV=3                                                                  | -0,119914988 | 1,041002 |
| P53990     | IST1 homolog OS=Homo sapiens OX=9606 GN=IST1 PE=1 SV=1                                                             | 0,175350823  | 1,039807 |
| Q9ULP9     | TBC1 domain family member 24 OS=Homo sapiens OX=9606 GN=TBC1D24 PE=1 SV=2                                          | -0,305116695 | 1,037307 |
| Q8X683     | COMM domain-containing protein 2 OS=Homo sapiens OX=9606 GN=COMM2 PE=1 SV=2                                        | -0,247023959 | 1,036809 |
| Q96JH7     | Deubiquitinating protein VCIPI35 OS=Homo sapiens OX=9606 GN=VCIPI1 PE=1 SV=2                                       | -0,246995772 | 1,036674 |
| Q9NX46     | ADP-ribose glycohydrolase ARH3 OS=Homo sapiens OX=9606 GN=ADPRHL2 PE=1 SV=1                                        | 0,246765388  | 1,035576 |
| P12107     | Collagen alpha-1(XI) chain OS=Homo sapiens OX=9606 GN=COL11A1 PE=1 SV=4                                            | 1,28994476   | 1,034026 |
| Q15629     | Translocating chain-associated membrane protein 1 OS=Homo sapiens OX=9606 GN=TRAM1 PE=1 SV=3                       | 0,213299751  | 1,034001 |
| Q14232     | Translation initiation factor eIF-2B subunit alpha OS=Homo sapiens OX=9606 GN=EIF2B1 PE=1 SV=1                     | -0,151464738 | 1,033896 |
| Q06587     | E3 ubiquitin-protein ligase RING1 OS=Homo sapiens OX=9606 GN=RING1 PE=1 SV=2                                       | -0,458421988 | 1,033001 |
| Q12955     | Ankyrin-3 OS=Homo sapiens OX=9606 GN=ANK3 PE=1 SV=3                                                                | 0,213045237  | 1,032565 |
| O00505     | Importin subunit alpha-4 OS=Homo sapiens OX=9606 GN=KPN3 PE=1 SV=2                                                 | -0,151104789 | 1,030939 |
| P0CW20     | LIM and senescent cell antigen-like-containing domain protein 4 OS=Homo sapiens OX=9606 GN=LIMS4 PE=1 SV=1         | -0,302950317 | 1,029361 |
| Q15139     | Serine/threonine-protein kinase D1 OS=Homo sapiens OX=9606 GN=PRKD1 PE=1 SV=2                                      | 0,302516281  | 1,027769 |
| Q15149     | Plectin OS=Homo sapiens OX=9606 GN=PLEC PE=1 SV=3                                                                  | -0,025862171 | 1,027669 |
| Q9H269     | Vacuolar protein sorting-associated protein 16 homolog OS=Homo sapiens OX=9606 GN=VPS16 PE=1 SV=2                  | -0,302162626 | 1,026471 |
| P36776     | Ron protease homolog, mitochondrial OS=Homo sapiens OX=9606 GN=LONP1 PE=1 SV=2                                     | 0,09576197   | 1,025772 |
| P12955     | Xaa-Pro dipeptidase OS=Homo sapiens OX=9606 GN=PEPD PE=1 SV=3                                                      | -0,118452386 | 1,025545 |
| P08134     | Rho-related GTP-binding protein RhoC OS=Homo sapiens OX=9606 GN=RHOX PE=1 SV=1                                     | -0,15037162  | 1,024922 |
| Q8N4V1     | Membrane magnesium transporter 1 OS=Homo sapiens OX=9606 GN=MMGT1 PE=1 SV=1                                        | 0,454359985  | 1,024666 |
| P41567     | Eukaryotic translation initiation factor 1 OS=Homo sapiens OX=9606 GN=EIF1 PE=1 SV=1                               | -0,172958412 | 1,022939 |
| Q9NWH9     | SARF-like transcription modulator OS=Homo sapiens OX=9606 GN=SLTM PE=1 SV=2                                        | 0,453198726  | 1,022277 |
| P36269     | Glutathione hydrolase 5 proenzyme OS=Homo sapiens OX=9606 GN=GGT5 PE=1 SV=2                                        | 0,28025001   | 1,021267 |
| Q7L273     | BTB/POZ domain-containing protein KCTD9 OS=Homo sapiens OX=9606 GN=KCTD9 PE=1 SV=1                                 | 0,363825549  | 1,020638 |
| P51828     | Adenylate cyclase type 7 OS=Homo sapiens OX=9606 GN=ADCY7 PE=1 SV=1                                                | -0,4518233   | 1,019446 |
| Q9BZ99     | Tether containing UBX domain for GLUT4 OS=Homo sapiens OX=9606 GN=ASPSCR1 PE=1 SV=1                                | -0,210678177 | 1,01923  |
| O76054     | SEC14-like protein 2 OS=Homo sapiens OX=9606 GN=SEC14L2 PE=1 SV=1                                                  | 0,451309216  | 1,018387 |
| P18206     | Vinculin OS=Homo sapiens OX=9606 GN=VCL PE=1 SV=4                                                                  | 0,049670094  | 1,017669 |
| P01891     | HLA class I histocompatibility antigen, A-68 alpha chain OS=Homo sapiens OX=9606 GN=HLA-A PE=1 SV=4                | -0,450894409 | 1,017532 |
| P15311     | Ezrin OS=Homo sapiens OX=9606 GN=EZR PE=1 SV=4                                                                     | 0,085093845  | 1,016248 |
| Q00341     | Vigilin OS=Homo sapiens OX=9606 GN=HDLBP1 PE=1 SV=2                                                                | 0,056496817  | 1,016129 |
| Q9BPX5     | Actin-related protein 2/3 complex subunit 5-like protein OS=Homo sapiens OX=9606 GN=ARPC5L PE=1 SV=1               | 0,171955407  | 1,015886 |
| Q15434     | RNA-binding motif, single-stranded-interacting protein 2 OS=Homo sapiens OX=9606 GN=RBM52 PE=1 SV=1                | -0,187882329 | 1,014387 |
| Q9Y2V7     | Golgi oligomeric Golgi complex subunit 6 OS=Homo sapiens OX=9606 GN=COG6 PE=1 SV=2                                 | 0,20975144   | 1,014018 |
| Q9BTV4     | Transmembrane protein 43 OS=Homo sapiens OX=9606 GN=TMEM43 PE=1 SV=1                                               | -0,113093422 | 1,013447 |
| O95758     | Polypyrimidine tract-binding protein 3 OS=Homo sapiens OX=9606 GN=PTBP3 PE=1 SV=2                                  | -0,476490225 | 1,012631 |
| Q92508     | Piezo-type mechanosensitive ion channel component 1 OS=Homo sapiens OX=9606 GN=PIEZO1 PE=1 SV=4                    | -0,187496963 | 1,011935 |
| P53602     | Diphosphomevalonate decarboxylase OS=Homo sapiens OX=9606 GN=MVD PE=1 SV=1                                         | -0,297991661 | 1,011171 |
| P43307     | Translocin-associated protein subunit alpha OS=Homo sapiens OX=9606 GN=SSR1 PE=1 SV=3                              | -0,20906924  | 1,010184 |
| Q16637     | Survival motor neuron protein OS=Homo sapiens OX=9606 GN=SMN1 PE=1 SV=1                                            | 0,064929158  | 1,009707 |
| P46939     | Utrrophin OS=Homo sapiens OX=9606 GN=UTRN PE=1 SV=2                                                                | 0,053462044  | 1,009407 |
| P38435     | Vitamin K-dependent gamma-carboxylase OS=Homo sapiens OX=9606 GN=GGCX PE=1 SV=2                                    | -0,44674661  | 1,008966 |
| O94973     | AP-2 complex subunit alpha-2 OS=Homo sapiens OX=9606 GN=AP2A2 PE=1 SV=2                                            | 0,099428902  | 1,007685 |
| O75380     | NADH dehydrogenase [ubiquinone] iron-sulfur protein 6, mitochondrial OS=Homo sapiens OX=9606 GN=NDUF56 PE=1 SV=1   | -0,240797029 | 1,007717 |
| P26639     | Threonine-tRNA ligase, cytoplasmic OS=Homo sapiens OX=9606 GN=TARS PE=1 SV=3                                       | -0,075921507 | 1,007085 |
| Q8N668     | COMM domain-containing protein 1 OS=Homo sapiens OX=9606 GN=COMM1 PE=1 SV=1                                        | -0,296587678 | 1,006021 |
| Q13404     | Ubiquitin-conjugating enzyme E2 variant 1 OS=Homo sapiens OX=9606 GN=UBE2V1 PE=1 SV=2                              | -0,186559026 | 1,005972 |
| Q8N3V7     | Synaptotagmin OS=Homo sapiens OX=9606 GN=SYNPO PE=1 SV=2                                                           | 0,296454321  | 1,005531 |
| P08397     | Porphobilinogen deaminase OS=Homo sapiens OX=9606 GN=HMBS PE=1 SV=2                                                | 0,186440468  | 1,005219 |
| Q1KMD3     | Heterogeneous nuclear ribonucleoprotein U-like protein 2 OS=Homo sapiens OX=9606 GN=HNRNPUL2 PE=1 SV=1             | 0,096394844  | 1,002451 |
| Q9H4G4     | Golgi-associated plant pathogenesis-related protein 1 OS=Homo sapiens OX=9606 GN=GLIPR2 PE=1 SV=3                  | 0,442866882  | 1,000928 |
| P50897     | Palmitoyl-protein thioesterase 1 OS=Homo sapiens OX=9606 GN=PPT1 PE=1 SV=1                                         | -0,239431254 | 1,000683 |
| P37802     | Transgelin-2 OS=Homo sapiens OX=9606 GN=TAGLN2 PE=1 SV=3                                                           | -0,089410199 | 0,999157 |
| P57721     | Poly(rC)-binding protein 3 OS=Homo sapiens OX=9606 GN=PCBP3 PE=2 SV=2                                              | 0,185443082  | 0,998887 |
| P28161     | Glutathione S-transferase Mu 2 OS=Homo sapiens OX=9606 GN=GSTM2 PE=1 SV=2                                          | -0,147043904 | 0,997726 |
| Q9NV96     | Cell cycle control protein 50A OS=Homo sapiens OX=9606 GN=TMEM30A PE=1 SV=1                                        | -0,238782102 | 0,997601 |
| Q13724     | Mannosyl-oligosaccharide glucosidase OS=Homo sapiens OX=9606 GN=MOGS PE=1 SV=5                                     | 0,101411724  | 0,997287 |
| Q9Y6Y0     | Influenza virus NS1A-binding protein OS=Homo sapiens OX=9606 GN=IVNS1ABP PE=1 SV=3                                 | -0,440694986 | 0,996417 |
| P56134     | ATP synthase subunit f, mitochondrial OS=Homo sapiens OX=9606 GN=ATP5MF PE=1 SV=3                                  | -0,238393227 | 0,995756 |
| Q9BW60     | Elongation of very long chain fatty acids protein 1 OS=Homo sapiens OX=9606 GN=ELOVL1 PE=1 SV=1                    | -0,29375961  | 0,995706 |
| P62854     | 40S ribosomal protein S26 OS=Homo sapiens OX=9606 GN=RPS26 PE=1 SV=3                                               | 0,2383771    | 0,995679 |
| O95684     | FGFR1 oncogene partner OS=Homo sapiens OX=9606 GN=FGFR10P PE=1 SV=1                                                | 0,515691404  | 0,99437  |
| Q8NB16     | Mixed lineage kinase domain-like protein OS=Homo sapiens OX=9606 GN=MLKL PE=1 SV=1                                 | -0,439378281 | 0,993678 |
| Q9UKI8     | Serine/threonine-protein kinase toxoid-like 1 OS=Homo sapiens OX=9606 GN=TLK1 PE=1 SV=2                            | -0,43859391  | 0,992045 |
| Q8N0U8     | Vitamin K epoxide reductase complex subunit 1-like protein 1 OS=Homo sapiens OX=9606 GN=VKORC1L1 PE=1 SV=2         | -0,292321216 | 0,990039 |
| Q9UJX2     | Cell division cycle protein 23 homolog OS=Homo sapiens OX=9606 GN=CDC23 PE=1 SV=3                                  | 0,437223868  | 0,98919  |
| Q12846     | Syntaxin-4 OS=Homo sapiens OX=9606 GN=STX4 PE=1 SV=2                                                               | -0,183851374 | 0,988799 |
| Q9NSD9     | Phenylalanine-tRNA ligase beta subunit OS=Homo sapiens OX=9606 GN=FARSB PE=1 SV=3                                  | -0,103617589 | 0,987114 |
| Q9HD67     | Unconventional myosin-X OS=Homo sapiens OX=9606 GN=MYO10 PE=1 SV=3                                                 | -0,436200919 | 0,987057 |
| P30533     | Alpha-2-macroglobulin receptor-associated protein OS=Homo sapiens OX=9606 GN=LRPAP1 PE=1 SV=1                      | 0,103608941  | 0,987014 |
| P36578     | 60S ribosomal protein L4 OS=Homo sapiens OX=9606 GN=RPL4 PE=1 SV=5                                                 | -0,084719937 | 0,986037 |
| Q92604     | Acyl-CoA:lysophosphatidylglycerol acyltransferase 1 OS=Homo sapiens OX=9606 GN=LPGAT1 PE=1 SV=1                    | -0,435598328 | 0,985799 |
| Q92859     | Neogenin OS=Homo sapiens OX=9606 GN=NEO1 PE=1 SV=2                                                                 | 0,43476498   | 0,984059 |

|        |                                                                                                                   |              |          |
|--------|-------------------------------------------------------------------------------------------------------------------|--------------|----------|
| P42167 | Lamina-associated polypeptide 2, isoforms beta/gamma OS=Homo sapiens OX=9606 GN=TMPO PE=1 SV=2                    | 0,124207423  | 0,983093 |
| Q8NSB7 | Ceramide synthase 5 OS=Homo sapiens OX=9606 GN=CERS5 PE=2 SV=1                                                    | 0,447592699  | 0,982964 |
| P63244 | Receptor of activated protein C kinase 1 OS=Homo sapiens OX=9606 GN=RACK1 PE=1 SV=3                               | 0,097403384  | 0,98269  |
| P23258 | Tubulin gamma-1 chain OS=Homo sapiens OX=9606 GN=TUBG1 PE=1 SV=2                                                  | 0,137021797  | 0,982571 |
| O94842 | TOX high mobility group box family member 4 OS=Homo sapiens OX=9606 GN=TOX4 PE=1 SV=1                             | 0,433871382  | 0,982192 |
| P68366 | Tubulin alpha-4A chain OS=Homo sapiens OX=9606 GN=TUBA4A PE=1 SV=1                                                | -0,203973012 | 0,981622 |
| P11388 | DNA topoisomerase 2-alpha OS=Homo sapiens OX=9606 GN=TOP2A PE=1 SV=3                                              | 0,094608999  | 0,979828 |
| Q9BUN8 | Derlin-1 OS=Homo sapiens OX=9606 GN=DERL1 PE=1 SV=1                                                               | 0,432383342  | 0,979079 |
| P55145 | Mesencephalic astrocyte-derived neurotrophic factor OS=Homo sapiens OX=9606 GN=MANF PE=1 SV=3                     | -0,203466514 | 0,978791 |
| Q9NVA2 | Septin-11 OS=Homo sapiens OX=9606 GN=SEPTIN11 PE=1 SV=3                                                           | -0,123757081 | 0,978788 |
| Q13315 | Serine-protein kinase ATM OS=Homo sapiens OX=9606 GN=ATM PE=1 SV=4                                                | -0,468792277 | 0,978644 |
| P52943 | Cysteine-rich protein 2 OS=Homo sapiens OX=9606 GN=CRIP2 PE=1 SV=1                                                | -0,182152682 | 0,978057 |
| Q9BQ70 | Transcription factor 25 OS=Homo sapiens OX=9606 GN=TCF25 PE=1 SV=1                                                | -0,136437004 | 0,97753  |
| Q9BX78 | RING finger protein 17 OS=Homo sapiens OX=9606 GN=RF17 PE=1 SV=3                                                  | 0,144653448  | 0,977439 |
| P55060 | Exportin-2 OS=Homo sapiens OX=9606 GN=CSE1L PE=1 SV=3                                                             | 0,075243985  | 0,976401 |
| Q9UBM7 | 7-dehydrocholesterol reductase OS=Homo sapiens OX=9606 GN=DHCR7 PE=1 SV=1                                         | 0,202849988  | 0,975348 |
| O95139 | NADH dehydrogenase [ubiquinone] 1 beta subcomplex subunit 6 OS=Homo sapiens OX=9606 GN=NDUFB6 PE=1 SV=3           | 0,43028654   | 0,974687 |
| Q9NWU5 | 39S ribosomal protein L22, mitochondrial OS=Homo sapiens OX=9606 GN=MRPL22 PE=1 SV=1                              | 0,811180682  | 0,974554 |
| Q5VZM2 | #N/D                                                                                                              | 0,287989058  | 0,974477 |
| Q9NY27 | Serine/threonine-protein phosphatase 4 regulatory subunit 2 OS=Homo sapiens OX=9606 GN=PPP4R2 PE=1 SV=3           | 0,287667206  | 0,973297 |
| Q9UGR2 | Zinc finger CCH domain-containing protein 7B OS=Homo sapiens OX=9606 GN=ZC3H7B PE=1 SV=2                          | 0,202480456  | 0,973284 |
| Q5JV50 | Intracellular hyaluronan-binding protein 4 OS=Homo sapiens OX=9606 GN=HABP4 PE=1 SV=1                             | -0,287600989 | 0,973054 |
| P10746 | Uroporphyrinogen-III synthase OS=Homo sapiens OX=9606 GN=URO3 PE=1 SV=1                                           | 0,429271599  | 0,972558 |
| P57105 | Synaptojanin-2-binding protein OS=Homo sapiens OX=9606 GN=SYNJ2BP PE=1 SV=2                                       | 0,509264725  | 0,97163  |
| Q96F06 | Protein S100-A16 OS=Homo sapiens OX=9606 GN=S100A16 PE=1 SV=1                                                     | 0,165511406  | 0,970838 |
| P15153 | Ras-related C3 botulinum toxin substrate 2 OS=Homo sapiens OX=9606 GN=RAC2 PE=1 SV=1                              | -0,165469403 | 0,970546 |
| P26572 | Alpha-1,3-mannosyl-glycoprotein 2-beta-N-acetylglucosaminyltransferase OS=Homo sapiens OX=9606 GN=MGAT1 PE=1 SV=2 | 0,42822628   | 0,970364 |
| O43776 | Asparagine--tRNA ligase, cytoplasmic OS=Homo sapiens OX=9606 GN=NARS PE=1 SV=1                                    | -0,087283381 | 0,970197 |
| Q9P0J7 | E3 ubiquitin-protein ligase KCMF1 OS=Homo sapiens OX=9606 GN=KCMF1 PE=1 SV=2                                      | 0,428111058  | 0,970122 |
| Q9NP61 | ADP-ribosylation factor GTPase-activating protein 3 OS=Homo sapiens OX=9606 GN=ARFGAP3 PE=1 SV=1                  | 0,143502772  | 0,968989 |
| Q8W242 | Titin OS=Homo sapiens OX=9606 GN=TTN PE=1 SV=4                                                                    | -0,201463271 | 0,967609 |
| P62937 | Peptidyl-prolyl cis-trans isomerase A OS=Homo sapiens OX=9606 GN=PPIA PE=1 SV=2                                   | -0,096172585 | 0,967592 |
| P30084 | Enoyl-CoA hydratase, mitochondrial OS=Homo sapiens OX=9606 GN=ECHS1 PE=1 SV=4                                     | 0,135161801  | 0,966562 |
| Q96H20 | Vacuolar-sorting protein SNF8 OS=Homo sapiens OX=9606 GN=SNF8 PE=1 SV=1                                           | -0,426348845 | 0,966418 |
| Q12931 | Heat shock protein 75 kDa, mitochondrial OS=Homo sapiens OX=9606 GN=TRAP1 PE=1 SV=3                               | -0,12242515  | 0,966084 |
| Q8WU76 | Sec1 family domain-containing protein 2 OS=Homo sapiens OX=9606 GN=SCFD2 PE=1 SV=2                                | -0,426048797 | 0,965787 |
| P42858 | Huntingtin OS=Homo sapiens OX=9606 GN=HTT PE=1 SV=2                                                               | 0,285599156  | 0,965711 |
| Q9NW64 | Pre-mRNA-splicing factor RBM22 OS=Homo sapiens OX=9606 GN=RBM22 PE=1 SV=1                                         | 0,424718265  | 0,962986 |
| P84077 | ADP-ribosylation factor 1 OS=Homo sapiens OX=9606 GN=ARF1 PE=1 SV=2                                               | 0,548650148  | 0,960948 |
| Q96PK6 | RNA-binding protein 14 OS=Homo sapiens OX=9606 GN=RBM14 PE=1 SV=2                                                 | 0,15194495   | 0,959426 |
| P30876 | DNA-directed RNA polymerase II subunit RPB2 OS=Homo sapiens OX=9606 GN=POLR2B PE=1 SV=1                           | -0,19998917  | 0,959396 |
| O95989 | Diphosphoinositol polyphosphate phosphohydrolase 1 OS=Homo sapiens OX=9606 GN=NUDT3 PE=1 SV=1                     | -0,42296165  | 0,959284 |
| O95373 | Importin-7 OS=Homo sapiens OX=9606 GN=IPO7 PE=1 SV=1                                                              | 0,076742654  | 0,959262 |
| Q9HB40 | Retinoid-inducible serine carboxypeptidase OS=Homo sapiens OX=9606 GN=SCPEP1 PE=1 SV=1                            | -0,422811893 | 0,958968 |
| Q13432 | Protein unc-119 homolog A OS=Homo sapiens OX=9606 GN=UNC119 PE=1 SV=1                                             | -0,422753835 | 0,958846 |
| P40429 | 60S ribosomal protein L13a OS=Homo sapiens OX=9606 GN=RPL13A PE=1 SV=2                                            | 0,142152882  | 0,958091 |
| Q9NQ92 | Coordinator of PRMT5 and differentiation stimulator OS=Homo sapiens OX=9606 GN=COPRS PE=1 SV=3                    | 0,282891006  | 0,955779 |
| Q7L576 | Cytoplasmic FMR1-interacting protein 1 OS=Homo sapiens OX=9606 GN=CYFIP1 PE=1 SV=1                                | 0,07384258   | 0,954221 |
| Q8WUJ2 | NudC domain-containing protein 2 OS=Homo sapiens OX=9606 GN=NUDC2 PE=1 SV=1                                       | -0,282442279 | 0,954133 |
| Q578D3 | Acyl-CoA-binding domain-containing protein 5 OS=Homo sapiens OX=9606 GN=ACBD5 PE=1 SV=1                           | 0,282309106  | 0,953645 |
| P68431 | Histone H3.1 OS=Homo sapiens OX=9606 GN=HIST1H3A PE=1 SV=2                                                        | 0,928579006  | 0,953126 |
| O43678 | NADH dehydrogenase [ubiquinone] 1 alpha subcomplex subunit 2 OS=Homo sapiens OX=9606 GN=NDUFA2 PE=1 SV=3          | 0,419996074  | 0,953023 |
| Q92890 | Ubiquitin recognition factor in ER-associated degradation protein 1 OS=Homo sapiens OX=9606 GN=UFD1 PE=1 SV=3     | -0,133567704 | 0,952866 |
| Q00264 | Membrane-associated progesterone receptor component 1 OS=Homo sapiens OX=9606 GN=PGRCM1 PE=1 SV=3                 | 0,178116396  | 0,95263  |
| Q86WRO | Coiled-coil domain-containing protein 25 OS=Homo sapiens OX=9606 GN=CCDC25 PE=1 SV=2                              | -0,419103418 | 0,951135 |
| Q9Y3C0 | WASH complex subunit 3 OS=Homo sapiens OX=9606 GN=WASHC3 PE=1 SV=1                                                | 0,281328067  | 0,950047 |
| Q12972 | Nuclear inhibitor of protein phosphatase 1 OS=Homo sapiens OX=9606 GN=PPP1R8 PE=1 SV=2                            | 0,417724185  | 0,948216 |
| Q13596 | Sorting nexin-1 OS=Homo sapiens OX=9606 GN=SNX1 PE=1 SV=3                                                         | 0,126049567  | 0,945783 |
| Q13131 | 5'-AMP-activated protein kinase catalytic subunit alpha-1 OS=Homo sapiens OX=9606 GN=PRKAA1 PE=1 SV=4             | -0,150082477 | 0,945441 |
| Q9UL63 | Muskelin OS=Homo sapiens OX=9606 GN=MKLN1 PE=1 SV=2                                                               | -1,735909042 | 0,944808 |
| O94804 | Serine/threonine-protein kinase 10 OS=Homo sapiens OX=9606 GN=STK10 PE=1 SV=1                                     | -0,140341227 | 0,943513 |
| Q8IYD1 | Eukaryotic peptide chain release factor GTP-binding subunit ERF3B OS=Homo sapiens OX=9606 GN=GSPT2 PE=1 SV=2      | -0,279442529 | 0,943133 |
| Q9H0D6 | 5'-3' exoribonuclease 2 OS=Homo sapiens OX=9606 GN=XRN2 PE=1 SV=1                                                 | -0,132412603 | 0,943025 |
| P51553 | Isocitrate dehydrogenase [NAD] subunit gamma, mitochondrial OS=Homo sapiens OX=9606 GN=IDH3G PE=1 SV=1            | 0,279369884  | 0,942867 |
| Q6UW63 | Protein O-glycosyltransferase 2 OS=Homo sapiens OX=9606 GN=POGLUT2 PE=1 SV=1                                      | -0,414742452 | 0,941894 |
| Q6P9B6 | MTOR-associated protein MEAK7 OS=Homo sapiens OX=9606 GN=MEAK7 PE=1 SV=2                                          | -0,149500181 | 0,941078 |
| O00231 | 26S proteasome non-ATPase regulatory subunit 11 OS=Homo sapiens OX=9606 GN=PSMD11 PE=1 SV=3                       | -0,085101642 | 0,940753 |
| Q9BT22 | Chitobiosyl/diphosphodolichol beta-mannosyltransferase OS=Homo sapiens OX=9606 GN=ALG1 PE=1 SV=2                  | 0,278757245  | 0,94062  |
| Q15147 | 1-phosphatidylinositol 4,5-bisphosphate phosphodiesterase beta-4 OS=Homo sapiens OX=9606 GN=PLCB4 PE=1 SV=3       | -0,278421729 | 0,93939  |
| O95630 | STAM-binding protein OS=Homo sapiens OX=9606 GN=STAMPB PE=1 SV=1                                                  | -0,175738197 | 0,937714 |
| O43399 | Tumor protein D54 OS=Homo sapiens OX=9606 GN=TPD52L2 PE=1 SV=2                                                    | 0,109965303  | 0,937156 |
| P47897 | Glutamine--tRNA ligase OS=Homo sapiens OX=9606 GN=QARS PE=1 SV=1                                                  | -0,069356513 | 0,936459 |
| Q9UN86 | Ras GTPase-activating protein-binding protein 2 OS=Homo sapiens OX=9606 GN=G3BP2 PE=1 SV=2                        | -0,139455467 | 0,936406 |
| P61956 | Small ubiquitin-related modifier 2 OS=Homo sapiens OX=9606 GN=SUMO2 PE=1 SV=3                                     | -0,388742327 | 0,93631  |
| P42766 | 60S ribosomal protein L35 OS=Homo sapiens OX=9606 GN=RPL35 PE=1 SV=2                                              | -0,277472976 | 0,935912 |
| P60604 | Ubiquitin-conjugating enzyme E2 G2 OS=Homo sapiens OX=9606 GN=UBE2G2 PE=1 SV=1                                    | 0,41192167   | 0,9359   |
| Q9BV38 | WD repeat-containing protein 18 OS=Homo sapiens OX=9606 GN=WDR18 PE=1 SV=2                                        | 0,225698734  | 0,935743 |
| Q9UHR5 | SAP30-binding protein OS=Homo sapiens OX=9606 GN=SAP30BP PE=1 SV=1                                                | -0,411779589 | 0,935598 |
| Q9NUQ6 | SPATS2-like protein OS=Homo sapiens OX=9606 GN=SPATS2L PE=1 SV=2                                                  | 0,124901763  | 0,93545  |
| Q5T160 | Probable arginine--tRNA ligase, mitochondrial OS=Homo sapiens OX=9606 GN=RARS2 PE=1 SV=1                          | -0,411262477 | 0,934497 |
| Q9GZM8 | Nuclear distribution protein nudE-like 1 OS=Homo sapiens OX=9606 GN=NDEL1 PE=1 SV=1                               | -0,242592219 | 0,934023 |
| Q9Y3A5 | Ribosome maturation protein SBDS OS=Homo sapiens OX=9606 GN=SBDS PE=1 SV=4                                        | 0,119022233  | 0,933831 |
| Q9UN22 | NSFL1 cofactor p47 OS=Homo sapiens OX=9606 GN=NSFL1C PE=1 SV=2                                                    | -0,124721118 | 0,933826 |
| Q9H2J4 | Phosducin-like protein 3 OS=Homo sapiens OX=9606 GN=PDCL3 PE=1 SV=1                                               | 0,148338882  | 0,932393 |
| P33947 | ER lumen protein-retaining receptor 2 OS=Homo sapiens OX=9606 GN=KDEL2 PE=1 SV=1                                  | 0,195105912  | 0,932276 |
| Q9P015 | 39S ribosomal protein L15, mitochondrial OS=Homo sapiens OX=9606 GN=MRPL15 PE=1 SV=1                              | -0,40975238  | 0,931281 |
| Q03001 | Dystonin OS=Homo sapiens OX=9606 GN=DST PE=1 SV=4                                                                 | 0,067991365  | 0,930693 |
| Q99747 | Gamma-soluble NSF attachment protein OS=Homo sapiens OX=9606 GN=NAPG PE=1 SV=1                                    | -0,174501619 | 0,929978 |
| P81605 | Dermcidin OS=Homo sapiens OX=9606 GN=DCD PE=1 SV=2                                                                | -0,408659927 | 0,928952 |
| P35241 | Radixin OS=Homo sapiens OX=9606 GN=RD3 PE=1 SV=1                                                                  | -0,072207013 | 0,928531 |
| P61201 | COP9 signalosome complex subunit 2 OS=Homo sapiens OX=9606 GN=COPS2 PE=1 SV=1                                     | -0,138389407 | 0,927871 |
| Q15005 | Signal peptidase complex subunit 2 OS=Homo sapiens OX=9606 GN=SPCS2 PE=1 SV=3                                     | 0,159248735  | 0,927508 |
| Q9H910 | Jupiter microtubule associated homolog 2 OS=Homo sapiens OX=9606 GN=JPT2 PE=1 SV=1                                | 0,194227485  | 0,927412 |
| P54136 | Arginine--tRNA ligase, cytoplasmic OS=Homo sapiens OX=9606 GN=RARS PE=1 SV=2                                      | -0,069839347 | 0,927015 |
| A0FGR8 | Extended synaptotagmin-2 OS=Homo sapiens OX=9606 GN=ESYT2 PE=1 SV=1                                               | 0,098353464  | 0,926615 |
| Q00796 | Sorbitol dehydrogenase OS=Homo sapiens OX=9606 GN=SORD PE=1 SV=4                                                  | -0,13807134  | 0,925328 |
| P39687 | Acidic leucine-rich nuclear phosphoprotein 32 family member A OS=Homo sapiens OX=9606 GN=ANP32A PE=1 SV=1         | 0,147336734  | 0,924913 |
| POCG39 | POTE ankyrin domain family member J OS=Homo sapiens OX=9606 GN=POTEJ PE=3 SV=1                                    | 0,406264772  | 0,923839 |

|        |                                                                                                                          |              |          |
|--------|--------------------------------------------------------------------------------------------------------------------------|--------------|----------|
| Q14108 | Lysosome membrane protein 2 OS=Homo sapiens OX=9606 GN=SCARB2 PE=1 SV=2                                                  | -0,117874438 | 0,923019 |
| Q92947 | Glutaryl-CoA dehydrogenase, mitochondrial OS=Homo sapiens OX=9606 GN=GCDH PE=1 SV=1                                      | -0,273627401 | 0,921816 |
| Q15070 | Mitochondrial inner membrane protein OXA1L OS=Homo sapiens OX=9606 GN=OXA1L PE=1 SV=3                                    | -0,404023457 | 0,919046 |
| Q96F85 | CB1 cannabinoid receptor-interacting protein 1 OS=Homo sapiens OX=9606 GN=CNRI1 PE=1 SV=1                                | -0,192697449 | 0,918951 |
| P30519 | Heme oxygenase 2 OS=Homo sapiens OX=9606 GN=HMOX2 PE=1 SV=2                                                              | -0,192556762 | 0,918174 |
| Q14137 | Ribosome biogenesis protein BOP1 OS=Homo sapiens OX=9606 GN=BOP1 PE=1 SV=2                                               | 0,221880164  | 0,917783 |
| O43395 | U4/U6 small nuclear ribonucleoprotein Prp3 OS=Homo sapiens OX=9606 GN=PRPF3 PE=1 SV=2                                    | -0,272373287 | 0,91722  |
| Q02252 | Methylmalonate-semialdehyde dehydrogenase [acylating], mitochondrial OS=Homo sapiens OX=9606 GN=ALDH6A1 PE=1 SV=2        | 0,272367162  | 0,917198 |
| P26368 | Splicing factor U2AF 65 kDa subunit OS=Homo sapiens OX=9606 GN=U2AF2 PE=1 SV=4                                           | -0,117187044 | 0,916566 |
| P55010 | Eukaryotic translation initiation factor 5 OS=Homo sapiens OX=9606 GN=EIF5 PE=1 SV=2                                     | -0,117141206 | 0,916133 |
| Q9UQE7 | Structural maintenance of chromosomes protein 3 OS=Homo sapiens OX=9606 GN=SMC3 PE=1 SV=2                                | -0,172159566 | 0,915362 |
| Q8WFF9 | Coiled-coil domain-containing protein 83 OS=Homo sapiens OX=9606 GN=CCDC83 PE=2 SV=2                                     | -0,6885822   | 0,914422 |
| P28066 | Proteasome subunit alpha type-5 OS=Homo sapiens OX=9606 GN=PSMA5 PE=1 SV=3                                               | -0,122537421 | 0,914259 |
| O43633 | Charged multivesicular body protein 2a OS=Homo sapiens OX=9606 GN=CHMP2A PE=1 SV=1                                       | -0,17191711  | 0,913851 |
| P42345 | Serine/threonine-protein kinase mTOR OS=Homo sapiens OX=9606 GN=MTOR PE=1 SV=1                                           | 0,191691911  | 0,913398 |
| Q96NE9 | FERM domain-containing protein 6 OS=Homo sapiens OX=9606 GN=FRMD6 PE=1 SV=1                                              | -0,191628653 | 0,913049 |
| P56377 | AP-1 complex subunit sigma-2 OS=Homo sapiens OX=9606 GN=AP1S2 PE=1 SV=1                                                  | -0,366150084 | 0,912864 |
| P04156 | Major prion protein OS=Homo sapiens OX=9606 GN=PRNP PE=1 SV=1                                                            | 0,271019794  | 0,912261 |
| P05026 | Sodium/potassium-transporting ATPase subunit beta-1 OS=Homo sapiens OX=9606 GN=ATP1B1 PE=1 SV=1                          | 0,400111404  | 0,91066  |
| P04844 | Dolichyl-diphosphooligosaccharide-protein glycosyltransferase subunit 2 OS=Homo sapiens OX=9606 GN=RPN2 PE=1 SV=3        | 0,082845824  | 0,910591 |
| O15355 | Protein phosphatase 1G OS=Homo sapiens OX=9606 GN=PPM1G PE=1 SV=1                                                        | 0,111655712  | 0,910373 |
| Q8WVQ1 | Soluble calcium-activated nucleotidase 1 OS=Homo sapiens OX=9606 GN=CANT1 PE=1 SV=1                                      | -0,282709646 | 0,910366 |
| Q08378 | Golgin subfamily A member 3 OS=Homo sapiens OX=9606 GN=GOLGA3 PE=1 SV=2                                                  | -0,077737951 | 0,910126 |
| Q8TB45 | DEP domain-containing mTOR-interacting protein OS=Homo sapiens OX=9606 GN=DEPTOR PE=1 SV=2                               | -0,399169637 | 0,908638 |
| P07602 | Prospapin OS=Homo sapiens OX=9606 GN=PSAP PE=1 SV=2                                                                      | -0,107072551 | 0,907541 |
| Q9BRP4 | Proteasomal ATPase-associated factor 1 OS=Homo sapiens OX=9606 GN=PAAF1 PE=1 SV=2                                        | -0,398278809 | 0,906723 |
| P27144 | Adenylate kinase 4, mitochondrial OS=Homo sapiens OX=9606 GN=AK4 PE=1 SV=1                                               | 0,156103829  | 0,905952 |
| Q9NY65 | #N/D                                                                                                                     | -0,134001944 | 0,905692 |
| Q5K651 | Sterile alpha motif domain-containing protein 9 OS=Homo sapiens OX=9606 GN=SAMD9 PE=1 SV=1                               | 0,397711583  | 0,905504 |
| P27707 | Deoxycytidine kinase OS=Homo sapiens OX=9606 GN=DCK PE=1 SV=1                                                            | -0,268846754 | 0,9043   |
| P60174 | Triosephosphate isomerase OS=Homo sapiens OX=9606 GN=TP1 PE=1 SV=3                                                       | -0,096279874 | 0,903084 |
| Q16401 | 26S proteasome non-ATPase regulatory subunit 5 OS=Homo sapiens OX=9606 GN=PSMD5 PE=1 SV=3                                | 0,096265885  | 0,902926 |
| Q05048 | Cleavage stimulation factor subunit 1 OS=Homo sapiens OX=9606 GN=CSTF1 PE=1 SV=1                                         | 0,39634508   | 0,902563 |
| Q8NI27 | THO complex subunit 2 OS=Homo sapiens OX=9606 GN=THOC2 PE=1 SV=2                                                         | 0,218625237  | 0,902511 |
| P53355 | Death-associated protein kinase 1 OS=Homo sapiens OX=9606 GN=DAPK1 PE=1 SV=6                                             | 0,297154735  | 0,902227 |
| O14976 | Cyclin-G-associated kinase OS=Homo sapiens OX=9606 GN=GAK PE=1 SV=2                                                      | -0,21856994  | 0,902252 |
| P42566 | Epidermal growth factor receptor substrate 15 OS=Homo sapiens OX=9606 GN=EPS15 PE=1 SV=2                                 | 0,110797826  | 0,901981 |
| Q9Y466 | WD repeat-containing protein 7 OS=Homo sapiens OX=9606 GN=WDR7 PE=1 SV=1                                                 | -0,133573051 | 0,901393 |
| Q15036 | Sorting nexin-17 OS=Homo sapiens OX=9606 GN=SNX17 PE=1 SV=1                                                              | -0,155428752 | 0,901301 |
| Q9H8M7 | Ubiquitin carboxyl-terminal hydrolase MINDY-3 OS=Homo sapiens OX=9606 GN=MINDY3 PE=1 SV=1                                | 0,395715471  | 0,901207 |
| Q14151 | Scaffold attachment factor B2 OS=Homo sapiens OX=9606 GN=SAFB2 PE=1 SV=1                                                 | 0,395618171  | 0,900999 |
| Q92615 | La-related protein 4B OS=Homo sapiens OX=9606 GN=LAR4B PE=1 SV=3                                                         | 0,189370372  | 0,900602 |
| Q92793 | CREB-binding protein OS=Homo sapiens OX=9606 GN=CREBBP PE=1 SV=3                                                         | -0,043253449 | 0,900286 |
| Q08431 | Lactadherin OS=Homo sapiens OX=9606 GN=MFGE8 PE=1 SV=3                                                                   | -0,120853332 | 0,899243 |
| O75569 | Interferon-inducible double-stranded RNA-dependent protein kinase activator A OS=Homo sapiens OX=9606 GN=PKRRA PE=1 SV=1 | -0,189055568 | 0,898869 |
| Q13510 | Acid ceramidase OS=Homo sapiens OX=9606 GN=ASAH1 PE=1 SV=5                                                               | -0,169467512 | 0,898621 |
| P49137 | MAP kinase-activated protein kinase 2 OS=Homo sapiens OX=9606 GN=MAPKAPK2 PE=1 SV=1                                      | -0,169440321 | 0,898452 |
| O14613 | Cdc42 effector protein 2 OS=Homo sapiens OX=9606 GN=CDC42EP2 PE=1 SV=1                                                   | -0,394117686 | 0,897764 |
| Q14103 | Heterogeneous nuclear ribonucleoprotein D0 OS=Homo sapiens OX=9606 GN=HNRNP D0 PE=1 SV=1                                 | -0,114890345 | 0,895067 |
| P20645 | Cation-dependent mannose-6-phosphate receptor OS=Homo sapiens OX=9606 GN=M6PR PE=1 SV=1                                  | -0,217011295 | 0,894951 |
| Q72519 | Interferon regulatory factor 2-binding protein 2 OS=Homo sapiens OX=9606 GN=IRF2BP2 PE=1 SV=2                            | 0,216981572  | 0,894812 |
| Q9NYF8 | Bcl-2-associated transcription factor 1 OS=Homo sapiens OX=9606 GN=BCLAF1 PE=1 SV=2                                      | 0,11482127   | 0,894423 |
| P49189 | 4-trimethylaminobutylaldehyde dehydrogenase OS=Homo sapiens OX=9606 GN=ALDH9A1 PE=1 SV=3                                 | -0,098581434 | 0,894264 |
| Q9BZ64 | Nucleolar GTP-binding protein 1 OS=Homo sapiens OX=9606 GN=GTPBP4 PE=1 SV=3                                              | 0,216841204  | 0,894155 |
| Q5JRX3 | Presequence protease, mitochondrial OS=Homo sapiens OX=9606 GN=PITRM1 PE=1 SV=3                                          | -0,087719474 | 0,893982 |
| Q15366 | Poly(I:C)-binding protein 2 OS=Homo sapiens OX=9606 GN=PCBP2 PE=1 SV=1                                                   | -0,114702899 | 0,893319 |
| Q9NWZ3 | Interleukin-1 receptor-associated kinase 4 OS=Homo sapiens OX=9606 GN=IRAK4 PE=1 SV=1                                    | -0,391934115 | 0,893051 |
| O95965 | Integrin beta-like protein 1 OS=Homo sapiens OX=9606 GN=ITGBL1 PE=2 SV=1                                                 | 0,142728528  | 0,890706 |
| Q9P260 | RAB11-binding protein RELCH OS=Homo sapiens OX=9606 GN=RELCH PE=1 SV=2                                                   | -0,15384187  | 0,890276 |
| Q13464 | Rho-associated protein kinase 1 OS=Homo sapiens OX=9606 GN=ROCK1 PE=1 SV=1                                               | 0,119838233  | 0,890223 |
| P00403 | Cytochrome c oxidase subunit 2 OS=Homo sapiens OX=9606 GN=MT-CO2 PE=1 SV=1                                               | -0,153640579 | 0,889092 |
| O43414 | ER11 exoribonuclease 3 OS=Homo sapiens OX=9606 GN=ER13 PE=1 SV=2                                                         | -0,264592082 | 0,88872  |
| O15040 | Tectonin beta-propeller repeat-containing protein 2 OS=Homo sapiens OX=9606 GN=TECPR2 PE=1 SV=4                          | -0,389669886 | 0,888156 |
| P42765 | 3-ketoacyl-CoA thiolase, mitochondrial OS=Homo sapiens OX=9606 GN=ACAA2 PE=1 SV=2                                        | -0,101399348 | 0,888104 |
| Q86TM6 | E3 ubiquitin-protein ligase synoviolin OS=Homo sapiens OX=9606 GN=SYVN1 PE=1 SV=2                                        | -0,63888173  | 0,888009 |
| P29728 | 2'-5'-oligoadenylate synthase 2 OS=Homo sapiens OX=9606 GN=OAS2 PE=1 SV=3                                                | -0,187865526 | 0,887524 |
| Q9NWV4 | CXXC motif containing zinc binding protein OS=Homo sapiens OX=9606 GN=CZIB PE=1 SV=1                                     | -0,186991158 | 0,887521 |
| P28065 | Proteasome subunit beta type-9 OS=Homo sapiens OX=9606 GN=PSMB9 PE=1 SV=2                                                | -0,389094182 | 0,88691  |
| Q99943 | 1-acyl-sn-glycerol-3-phosphate acyltransferase alpha OS=Homo sapiens OX=9606 GN=AGPAT1 PE=1 SV=2                         | -0,388954242 | 0,886607 |
| Q13049 | E3 ubiquitin-protein ligase TRIM32 OS=Homo sapiens OX=9606 GN=TRIM32 PE=1 SV=2                                           | -0,186617188 | 0,885468 |
| O43184 | Disintegrin and metalloproteinase domain-containing protein 12 OS=Homo sapiens OX=9606 GN=ADAM12 PE=1 SV=3               | 0,388237112  | 0,885054 |
| Q9BSK0 | MARVEL domain-containing protein 1 OS=Homo sapiens OX=9606 GN=MARVELD1 PE=1 SV=1                                         | -0,388185361 | 0,884942 |
| Q6IA69 | Glutamine-dependent NAD(+) synthetase OS=Homo sapiens OX=9606 GN=NADSYN1 PE=1 SV=3                                       | 1,178726365  | 0,884787 |
| Q9UJX3 | Anaphase-promoting complex subunit 7 OS=Homo sapiens OX=9606 GN=ANAPC7 PE=1 SV=4                                         | -0,214822474 | 0,884712 |
| A6NDG6 | Glycerol-3-phosphate phosphatase OS=Homo sapiens OX=9606 GN=PGP PE=1 SV=1                                                | 0,167078647  | 0,88382  |
| Q9BR76 | Coronin-1B OS=Homo sapiens OX=9606 GN=CORO1B PE=1 SV=1                                                                   | 0,100982548  | 0,883722 |
| Q567U6 | Coiled-coil domain-containing protein 93 OS=Homo sapiens OX=9606 GN=CCDC93 PE=1 SV=2                                     | 0,214599799  | 0,883671 |
| Q14692 | Ribosome biogenesis protein BMS1 homolog OS=Homo sapiens OX=9606 GN=BMS1 PE=1 SV=1                                       | 0,252649784  | 0,882714 |
| O75165 | Dnaj homolog subfamily C member 13 OS=Homo sapiens OX=9606 GN=DNAJC13 PE=1 SV=5                                          | -0,084562874 | 0,881842 |
| P17050 | Alpha-N-acetylgalactosaminidase OS=Homo sapiens OX=9606 GN=NAGA PE=1 SV=2                                                | -0,386578264 | 0,881459 |
| P30536 | Translocator protein OS=Homo sapiens OX=9606 GN=TSPO PE=1 SV=3                                                           | -0,214031399 | 0,881015 |
| P04818 | Thymidylate synthase OS=Homo sapiens OX=9606 GN=TYMS PE=1 SV=3                                                           | 0,214017511  | 0,88095  |
| P04083 | Annexin A1 OS=Homo sapiens OX=9606 GN=ANXA1 PE=1 SV=2                                                                    | 0,077202015  | 0,88077  |
| P52888 | Thimet oligopeptidase OS=Homo sapiens OX=9606 GN=THOP1 PE=1 SV=2                                                         | -0,10442214  | 0,880636 |
| Q16836 | Hydroxyacyl-coenzyme A dehydrogenase, mitochondrial OS=Homo sapiens OX=9606 GN=HADH PE=1 SV=3                            | 0,152337924  | 0,880222 |
| Q8NDT2 | Putative RNA-binding protein 15B OS=Homo sapiens OX=9606 GN=RBM15B PE=1 SV=3                                             | 0,228718038  | 0,878353 |
| Q04637 | Eukaryotic translation initiation factor 4 gamma 1 OS=Homo sapiens OX=9606 GN=EIF4G1 PE=1 SV=4                           | 0,057686231  | 0,878216 |
| Q96B13 | Axin interactor, dorsalization-associated protein OS=Homo sapiens OX=9606 GN=AI1 PE=1 SV=1                               | -0,185290714 | 0,878193 |
| O43809 | Cleavage and polyadenylation specificity factor subunit 5 OS=Homo sapiens OX=9606 GN=NUDT21 PE=1 SV=1                    | -0,152024133 | 0,878088 |
| O10570 | Cleavage and polyadenylation specificity factor subunit 1 OS=Homo sapiens OX=9606 GN=CPSF1 PE=1 SV=2                     | -0,384750253 | 0,877492 |
| Q16539 | Mitogen-activated protein kinase 14 OS=Homo sapiens OX=9606 GN=MAPK14 PE=1 SV=3                                          | -0,140852217 | 0,876866 |
| Q9BY77 | Polymerase delta-interacting protein 3 OS=Homo sapiens OX=9606 GN=POLDIP3 PE=1 SV=2                                      | 0,212819454  | 0,875355 |
| O14807 | Ras-related protein M-Ras OS=Homo sapiens OX=9606 GN=MRAS PE=1 SV=2                                                      | 0,511375836  | 0,874638 |
| P16083 | Ribosylidihydroxycotinamide dehydrogenase [quinone] OS=Homo sapiens OX=9606 GN=NQO2 PE=1 SV=5                            | -0,165548074 | 0,874364 |
| Q712K3 | Ubiquitin-conjugating enzyme E2 R2 OS=Homo sapiens OX=9606 GN=UBE2R2 PE=1 SV=1                                           | -0,281860926 | 0,873994 |
| P63313 | Thymosin beta-10 OS=Homo sapiens OX=9606 GN=TMSB10 PE=1 SV=2                                                             | -0,38295099  | 0,873582 |
| Q8N3R9 | MAGUK p55 subfamily member 5 OS=Homo sapiens OX=9606 GN=MPP5 PE=1 SV=3                                                   | -0,382807584 | 0,87327  |
| Q08209 | Serine/threonine-protein phosphatase 2B catalytic subunit alpha isoform OS=Homo sapiens OX=9606 GN=PPP3CA PE=1 SV=1      | 0,184314509  | 0,872846 |

|        |                                                                                                                        |              |          |
|--------|------------------------------------------------------------------------------------------------------------------------|--------------|----------|
| Q99459 | Cell division cycle 5-like protein OS=Homo sapiens OX=9606 GN=CDC5L PE=1 SV=2                                          | 0,151068252  | 0,871596 |
| Q0VDF9 | Heat shock 70 kDa protein 14 OS=Homo sapiens OX=9606 GN=HSPA14 PE=1 SV=1                                               | -0,259695185 | 0,870799 |
| Q8NB49 | Phospholipid-transporting ATPase IG OS=Homo sapiens OX=9606 GN=ATP11C PE=1 SV=3                                        | 0,211835171  | 0,870763 |
| Q9Y646 | Carboxypeptidase Q OS=Homo sapiens OX=9606 GN=CPQ PE=1 SV=1                                                            | -0,140002671 | 0,870617 |
| P15374 | Ubiquitin carboxyl-terminal hydrolase isozyme L3 OS=Homo sapiens OX=9606 GN=UCHL3 PE=1 SV=1                            | 0,164825124  | 0,869905 |
| O15111 | Inhibitor of nuclear factor kappa-B kinase subunit alpha OS=Homo sapiens OX=9606 GN=CHUK PE=1 SV=2                     | -0,211105561 | 0,867361 |
| Q8N3C0 | Activating signal cointegrator 1 complex subunit 3 OS=Homo sapiens OX=9606 GN=ASCC3 PE=1 SV=3                          | -0,183298699 | 0,867289 |
| Q14160 | Protein scribble homolog OS=Homo sapiens OX=9606 GN=SCRIB PE=1 SV=4                                                    | -0,210918773 | 0,866499 |
| P24539 | ATP synthase F(0) complex subunit B1, mitochondrial OS=Homo sapiens OX=9606 GN=ATP5PB PE=1 SV=2                        | 0,11164091   | 0,864891 |
| Q9Y320 | Thioredoxin-related transmembrane protein 2 OS=Homo sapiens OX=9606 GN=TMX2 PE=1 SV=1                                  | 0,149955898  | 0,864054 |
| Q13769 | THO complex subunit 5 homolog OS=Homo sapiens OX=9606 GN=THOC5 PE=1 SV=2                                               | 0,535941474  | 0,862889 |
| O15260 | Surfeit locus protein 4 OS=Homo sapiens OX=9606 GN=SURF4 PE=1 SV=3                                                     | 0,182476711  | 0,862797 |
| Q75832 | 26S proteasome non-ATPase regulatory subunit 10 OS=Homo sapiens OX=9606 GN=PSMD10 PE=1 SV=1                            | 0,130124432  | 0,862362 |
| Q03135 | Caveolin-1 OS=Homo sapiens OX=9606 GN=CAV1 PE=1 SV=4                                                                   | 0,13867806   | 0,860895 |
| Q05682 | Caldesmon OS=Homo sapiens OX=9606 GN=CALD1 PE=1 SV=3                                                                   | -0,060969785 | 0,858037 |
| Q9UNK0 | Syntaxin-8 OS=Homo sapiens OX=9606 GN=STX8 PE=1 SV=2                                                                   | -0,640788332 | 0,857089 |
| P50542 | Ceroid-lipofuscinosis neuronal protein 1 receptor OS=Homo sapiens OX=9606 GN=PEX5 PE=1 SV=3                            | -0,255697051 | 0,856178 |
| P11441 | Ubiquitin-like protein 4A OS=Homo sapiens OX=9606 GN=UBL4A PE=1 SV=1                                                   | -0,286059175 | 0,855723 |
| Q99757 | Thioredoxin, mitochondrial OS=Homo sapiens OX=9606 GN=TXN2 PE=1 SV=2                                                   | -0,208590879 | 0,855648 |
| P11777 | Pyruvate dehydrogenase E1 component subunit beta, mitochondrial OS=Homo sapiens OX=9606 GN=PDHB PE=1 SV=3              | 0,110589755  | 0,855188 |
| P43246 | DNA mismatch repair protein Msh2 OS=Homo sapiens OX=9606 GN=MSH2 PE=1 SV=1                                             | -0,162391626 | 0,85493  |
| Q10567 | AP-1 complex subunit beta-1 OS=Homo sapiens OX=9606 GN=AP1B1 PE=1 SV=2                                                 | 0,086744796  | 0,854207 |
| P08651 | Nuclear factor 1 C-type OS=Homo sapiens OX=9606 GN=NFIC PE=1 SV=2                                                      | 0,373514596  | 0,852993 |
| Q96HE7 | ERO1-like protein alpha OS=Homo sapiens OX=9606 GN=ERO1A PE=1 SV=2                                                     | -0,105724212 | 0,852777 |
| O75503 | Ceroid-lipofuscinosis neuronal protein 5 OS=Homo sapiens OX=9606 GN=CLN5 PE=1 SV=2                                     | -0,373385979 | 0,852712 |
| Q9Y3P9 | Ras GTPase-activating protein 1 OS=Homo sapiens OX=9606 GN=RABGAP1 PE=1 SV=3                                           | 0,110288321  | 0,852411 |
| P42785 | Lysosomal Pro-X carboxypeptidase OS=Homo sapiens OX=9606 GN=PRCP PE=1 SV=1                                             | -0,180540184 | 0,852223 |
| P42679 | Megakaryocyte-associated tyrosine-protein kinase OS=Homo sapiens OX=9606 GN=MATK PE=1 SV=1                             | -0,372928334 | 0,851709 |
| Q13409 | Cytoplasmic dynein 1 intermediate chain 2 OS=Homo sapiens OX=9606 GN=DYNC1I2 PE=1 SV=3                                 | 0,105582209  | 0,85141  |
| Q96B54 | Zinc finger protein 428 OS=Homo sapiens OX=9606 GN=ZNF428 PE=1 SV=2                                                    | 0,372772818  | 0,851369 |
| P09525 | Annexin A4 OS=Homo sapiens OX=9606 GN=ANXA4 PE=1 SV=4                                                                  | 0,080111738  | 0,850588 |
| Q04726 | Transducin-like enhancer protein 3 OS=Homo sapiens OX=9606 GN=TLE3 PE=1 SV=2                                           | 0,338957937  | 0,850547 |
| Q723B4 | Nucleoporin p54 OS=Homo sapiens OX=9606 GN=NUP54 PE=1 SV=2                                                             | 0,161677129  | 0,850544 |
| P30039 | Phenazine biosynthesis-like domain-containing protein OS=Homo sapiens OX=9606 GN=PBLD PE=1 SV=2                        | 0,377251993  | 0,850429 |
| Q9P012 | ER membrane protein complex subunit 3 OS=Homo sapiens OX=9606 GN=EMC3 PE=1 SV=3                                        | 0,161520865  | 0,849585 |
| P38570 | Integrin alpha-E OS=Homo sapiens OX=9606 GN=ITGAE PE=1 SV=3                                                            | 0,371793087  | 0,849222 |
| Q9H6R4 | Nucleolar protein 6 OS=Homo sapiens OX=9606 GN=NOL6 PE=1 SV=2                                                          | -0,371269281 | 0,848074 |
| O95295 | SNARE-associated protein Snapin OS=Homo sapiens OX=9606 GN=SNAPIN PE=1 SV=1                                            | -0,20691426  | 0,847852 |
| P21281 | V-type proton ATPase subunit B, brain isoform OS=Homo sapiens OX=9606 GN=ATP6V1B2 PE=1 SV=3                            | 0,094192482  | 0,846718 |
| O43516 | WAS/WASL-interacting protein family member 1 OS=Homo sapiens OX=9606 GN=WIPF1 PE=1 SV=3                                | 0,370640987  | 0,846696 |
| Q9Y5Q8 | General transcription factor 3C polypeptide 5 OS=Homo sapiens OX=9606 GN=GTF3C5 PE=1 SV=2                              | -0,370542567 | 0,846648 |
| Q8NBX0 | Saccharopine dehydrogenase-like oxidoreductase OS=Homo sapiens OX=9606 GN=SCCPDH PE=1 SV=1                             | -0,128056964 | 0,846162 |
| Q9NS00 | Glycoprotein N-acetylglucosamine 3-beta-galactosyltransferase 1 OS=Homo sapiens OX=9606 GN=C1GALT1 PE=1 SV=1           | 0,206326184  | 0,845119 |
| P62888 | 60S ribosomal protein L30 OS=Homo sapiens OX=9606 GN=RPL30 PE=1 SV=2                                                   | -0,160743181 | 0,844817 |
| Q8TEQ6 | Gem-associated protein 5 OS=Homo sapiens OX=9606 GN=GEMIN5 PE=1 SV=3                                                   | -0,206241662 | 0,844727 |
| Q99973 | Telomerase protein component 1 OS=Homo sapiens OX=9606 GN=TEP1 PE=1 SV=2                                               | 0,356765969  | 0,842952 |
| Q9UKZ1 | CCR4-NOT transcription complex subunit 11 OS=Homo sapiens OX=9606 GN=CNOT11 PE=1 SV=1                                  | -0,152108909 | 0,842606 |
| Q43897 | Tolluid-like protein 1 OS=Homo sapiens OX=9606 GN=TLL1 PE=1 SV=1                                                       | 0,368661578  | 0,842335 |
| Q01105 | Protein SET OS=Homo sapiens OX=9606 GN=SET PE=1 SV=3                                                                   | 0,136120432  | 0,842195 |
| O60343 | TBC1 domain family member 4 OS=Homo sapiens OX=9606 GN=TBC1D4 PE=1 SV=2                                                | -0,193572396 | 0,841638 |
| P63241 | Eukaryotic translation initiation factor 5A-1 OS=Homo sapiens OX=9606 GN=EIF5A PE=1 SV=2                               | -0,104535853 | 0,841359 |
| Q14651 | Plastin-1 OS=Homo sapiens OX=9606 GN=PLS1 PE=1 SV=2                                                                    | 0,178495286  | 0,841098 |
| P42892 | Endothelin-converting enzyme 1 OS=Homo sapiens OX=9606 GN=ECE1 PE=1 SV=2                                               | -0,160120768 | 0,841005 |
| Q9H1K6 | Talin rod domain-containing protein 1 OS=Homo sapiens OX=9606 GN=TLNRO1 PE=1 SV=1                                      | 0,367350974  | 0,83947  |
| Q6ZRR7 | Leucine-rich repeat-containing protein 9 OS=Homo sapiens OX=9606 GN=LRR9C PE=2 SV=2                                    | 0,367262758  | 0,839276 |
| Q93063 | Exostosin-2 OS=Homo sapiens OX=9606 GN=EXT2 PE=1 SV=1                                                                  | 0,367203291  | 0,839145 |
| Q9NRZ7 | 1-acyl-sn-glycerol-3-phosphate acyltransferase gamma OS=Homo sapiens OX=9606 GN=AGPAT3 PE=1 SV=1                       | -0,367163298 | 0,839057 |
| P46977 | Dolichyl-diphosphooligosaccharide-protein glycosyltransferase subunit STT3A OS=Homo sapiens OX=9606 GN=STT3A PE=1 SV=2 | 0,093465586  | 0,838913 |
| P16219 | Short-chain specific acyl-CoA dehydrogenase, mitochondrial OS=Homo sapiens OX=9606 GN=ACADS PE=1 SV=1                  | -0,422391151 | 0,838715 |
| P16278 | Beta-galactosidase OS=Homo sapiens OX=9606 GN=GLB1 PE=1 SV=2                                                           | -0,159604168 | 0,837844 |
| O15264 | #N/D                                                                                                                   | -0,078083333 | 0,837786 |
| P78356 | Phosphatidylinositol 5-phosphate 4-kinase type-2 beta OS=Homo sapiens OX=9606 GN=PIP4K2B PE=1 SV=1                     | -0,110528819 | 0,837544 |
| O14745 | Na(+)/H(+) exchange regulatory cofactor NHE-RF1 OS=Homo sapiens OX=9606 GN=SLC9A3R1 PE=1 SV=4                          | 0,159545345  | 0,837484 |
| Q14320 | Protein FAM50A OS=Homo sapiens OX=9606 GN=FAM50A PE=1 SV=2                                                             | 0,250442634  | 0,836979 |
| P46926 | Glucosamine-6-phosphate isomerase 1 OS=Homo sapiens OX=9606 GN=GNDPA1 PE=1 SV=1                                        | -0,135351613 | 0,836593 |
| Q9Y2Z4 | Tyrosine--tRNA ligase, mitochondrial OS=Homo sapiens OX=9606 GN=YARS2 PE=1 SV=2                                        | -0,326037155 | 0,83405  |
| Q709C8 | Vacuolar protein sorting-associated protein 13C OS=Homo sapiens OX=9606 GN=VPS13C PE=1 SV=1                            | -0,203523546 | 0,832114 |
| Q96G26 | Solute carrier family 41 member 3 OS=Homo sapiens OX=9606 GN=SLC41A3 PE=1 SV=2                                         | -0,258827319 | 0,831129 |
| O14950 | Myosin regulatory light chain 12B OS=Homo sapiens OX=9606 GN=MYL12B PE=1 SV=2                                          | -0,248746098 | 0,830785 |
| Q9BW83 | Intraflagellar transport protein 27 homolog OS=Homo sapiens OX=9606 GN=IFT27 PE=1 SV=1                                 | 0,363398956  | 0,830768 |
| P48357 | Leptin receptor OS=Homo sapiens OX=9606 GN=LEPR PE=1 SV=2                                                              | 0,373675187  | 0,830514 |
| O95881 | Thioredoxin domain-containing protein 12 OS=Homo sapiens OX=9606 GN=TXNDC12 PE=1 SV=1                                  | -0,158385397 | 0,830396 |
| Q9Y2W2 | WW domain-binding protein 11 OS=Homo sapiens OX=9606 GN=WBP11 PE=1 SV=1                                                | 0,203073575  | 0,830029 |
| Q9UNH6 | Sorting nexin-7 OS=Homo sapiens OX=9606 GN=SNX7 PE=1 SV=1                                                              | 0,212306107  | 0,82981  |
| Q8TCZ2 | CD99 antigen-like protein 2 OS=Homo sapiens OX=9606 GN=CD99L2 PE=1 SV=1                                                | 0,202955905  | 0,829484 |
| P16220 | Cyclic AMP-responsive element-binding protein 1 OS=Homo sapiens OX=9606 GN=CREB1 PE=1 SV=2                             | 0,362394631  | 0,828553 |
| Q8NEB9 | Phosphatidylinositol 3-kinase catalytic subunit type 3 OS=Homo sapiens OX=9606 GN=PIK3C3 PE=1 SV=1                     | -0,157736353 | 0,826435 |
| P31431 | Syndecan-4 OS=Homo sapiens OX=9606 GN=SDC4 PE=1 SV=2                                                                   | 0,361193157  | 0,825901 |
| Q8NHP6 | Motile sperm domain-containing protein 2 OS=Homo sapiens OX=9606 GN=MOSPD2 PE=1 SV=1                                   | 0,201934279  | 0,824753 |
| Q722W4 | Zinc finger CCCH-type antiviral protein 1 OS=Homo sapiens OX=9606 GN=ZC3HAV1 PE=1 SV=3                                 | 0,08919181   | 0,823939 |
| Q9NPF4 | Probable tRNA N6-adenosine threonylcarbamoyltransferase OS=Homo sapiens OX=9606 GN=OSGEP PE=1 SV=1                     | 0,360121232  | 0,823535 |
| Q01968 | Inositol polyphosphate 5-phosphatase OCRL-1 OS=Homo sapiens OX=9606 GN=OCRL PE=1 SV=3                                  | -0,175079683 | 0,822565 |
| Q8IXJ6 | NAD-dependent protein deacetylase sirtuin-2 OS=Homo sapiens OX=9606 GN=SIRT2 PE=1 SV=2                                 | -0,359005348 | 0,821067 |
| Q9Y311 | F-box only protein 7 OS=Homo sapiens OX=9606 GN=FBXO7 PE=1 SV=1                                                        | 0,35888491   | 0,82028  |
| O43396 | Thioredoxin-like protein 1 OS=Homo sapiens OX=9606 GN=TXNL1 PE=1 SV=3                                                  | 0,094931575  | 0,820779 |
| Q6IN85 | Serine/threonine-protein phosphatase 4 regulatory subunit 3A OS=Homo sapiens OX=9606 GN=PPP4R3A PE=1 SV=1              | 0,358754765  | 0,820512 |
| O14657 | Torsin-1B OS=Homo sapiens OX=9606 GN=TOR1B PE=1 SV=2                                                                   | -0,200943012 | 0,820165 |
| P61764 | Syntaxin-binding protein 1 OS=Homo sapiens OX=9606 GN=STXB1 PE=1 SV=1                                                  | 0,124652609  | 0,81965  |
| Q6NUK1 | Calcium-binding mitochondrial carrier protein ScaMC-1 OS=Homo sapiens OX=9606 GN=SLC25A24 PE=1 SV=2                    | -0,094801722 | 0,819442 |
| Q08257 | Quinone oxidoreductase OS=Homo sapiens OX=9606 GN=CRYZ PE=1 SV=1                                                       | -0,143316646 | 0,819348 |
| P49589 | Cysteine--tRNA ligase, cytoplasmic OS=Homo sapiens OX=9606 GN=CARS PE=1 SV=3                                           | -0,064021205 | 0,818865 |
| Q9P0R6 | GSK3B-interacting protein OS=Homo sapiens OX=9606 GN=GSKIP PE=1 SV=2                                                   | -0,357958359 | 0,818725 |
| Q92917 | G-patch domain and KOW motifs-containing protein OS=Homo sapiens OX=9606 GN=GPKOW PE=1 SV=2                            | -0,245024853 | 0,817206 |
| Q13637 | Ras-related protein Rab-32 OS=Homo sapiens OX=9606 GN=RAB32 PE=1 SV=3                                                  | 0,111428946  | 0,816418 |
| Q9BPW8 | Protein NipSnap homolog 1 OS=Homo sapiens OX=9606 GN=NIPSNAP1 PE=1 SV=1                                                | 0,244699074  | 0,816017 |
| Q03393 | 6-pyruvoyl tetrahydrobiopterin synthase OS=Homo sapiens OX=9606 GN=PTS PE=1 SV=1                                       | -0,356518528 | 0,815562 |
| Q01995 | Transgelin OS=Homo sapiens OX=9606 GN=TAGLN PE=1 SV=4                                                                  | 0,064823547  | 0,815165 |
| Q92643 | GPI-anchor transamidase OS=Homo sapiens OX=9606 GN=PIGK PE=1 SV=2                                                      | 0,244278595  | 0,814484 |

|        |                                                                                                                      |              |          |
|--------|----------------------------------------------------------------------------------------------------------------------|--------------|----------|
| Q96KP4 | Cytosolic non-specific dipeptidase OS=Homo sapiens OX=9606 GN=CNDP2 PE=1 SV=2                                        | 0,094314476  | 0,81443  |
| Q75157 | TSC22 domain family protein 2 OS=Homo sapiens OX=9606 GN=TSC22D2 PE=1 SV=3                                           | 0,355477614  | 0,813256 |
| Q9NV17 | ATPase family AAA domain-containing protein 3A OS=Homo sapiens OX=9606 GN=ATAD3A PE=1 SV=2                           | -0,123754623 | 0,812692 |
| Q9Y2L1 | Exosome complex exonuclease RRP44 OS=Homo sapiens OX=9606 GN=DIS3 PE=1 SV=2                                          | -0,17311223  | 0,811924 |
| Q9H307 | Pinin OS=Homo sapiens OX=9606 GN=PNN PE=1 SV=5                                                                       | 0,199147471  | 0,811866 |
| Q6P1M0 | Long-chain fatty acid transport protein 4 OS=Homo sapiens OX=9606 GN=SLC27A4 PE=1 SV=1                               | 0,350191592  | 0,811675 |
| O00567 | Nucleolar protein 56 OS=Homo sapiens OX=9606 GN=NOP56 PE=1 SV=4                                                      | 0,110859031  | 0,811475 |
| Q43854 | EGF-like repeat and discoidin I-like domain-containing protein 3 OS=Homo sapiens OX=9606 GN=EDIL3 PE=1 SV=1          | 0,123358053  | 0,809623 |
| Q9UBT7 | Heat-shock catulin OS=Homo sapiens OX=9606 GN=CTNNA1 PE=1 SV=2                                                       | 0,353801594  | 0,809538 |
| Q9P212 | 1-phosphatidylinositol 4,5-bisphosphate phosphodiesterase epsilon-1 OS=Homo sapiens OX=9606 GN=PLCE1 PE=1 SV=3       | -0,353760316 | 0,809447 |
| P42330 | Aldo-keto reductase family 1 member C3 OS=Homo sapiens OX=9606 GN=AKR1C3 PE=1 SV=4                                   | 0,154911513  | 0,809243 |
| Q96B97 | SH3 domain-containing kinase-binding protein 1 OS=Homo sapiens OX=9606 GN=SH3KBP1 PE=1 SV=2                          | 0,101134841  | 0,808906 |
| P33992 | DNA replication licensing factor MCM5 OS=Homo sapiens OX=9606 GN=MCM5 PE=1 SV=5                                      | 0,172390946  | 0,808029 |
| Q8TBX8 | Phosphatidylinositol 5-phosphate 4-kinase type-2 gamma OS=Homo sapiens OX=9606 GN=PIP4K2C PE=1 SV=3                  | 0,352419792  | 0,80647  |
| Q9UBW8 | COP9 signalosome complex subunit 7a OS=Homo sapiens OX=9606 GN=COP57A PE=1 SV=1                                      | -0,131195202 | 0,80646  |
| Q75976 | Carboxypeptidase D OS=Homo sapiens OX=9606 GN=CPD PE=1 SV=2                                                          | 0,352524978  | 0,806104 |
| O43301 | Heat shock 70 kDa protein 12A OS=Homo sapiens OX=9606 GN=HSPA12A PE=1 SV=2                                           | -0,209971076 | 0,805662 |
| O43815 | Striatin OS=Homo sapiens OX=9606 GN=STRN PE=1 SV=4                                                                   | 0,197664631  | 0,805021 |
| Q12765 | Secernin-1 OS=Homo sapiens OX=9606 GN=SCRN1 PE=1 SV=2                                                                | -0,100672413 | 0,804519 |
| Q96Q67 | Myotubularin-related protein 9 OS=Homo sapiens OX=9606 GN=MTMR9 PE=1 SV=1                                            | -0,35139946  | 0,804203 |
| P27635 | 60S ribosomal protein L10 OS=Homo sapiens OX=9606 GN=RPL10 PE=1 SV=4                                                 | 0,100618939  | 0,804012 |
| Q99829 | Copine-1 OS=Homo sapiens OX=9606 GN=CPNE1 PE=1 SV=1                                                                  | 0,104901958  | 0,803182 |
| O94813 | Slit homolog 2 protein OS=Homo sapiens OX=9606 GN=SLIT2 PE=1 SV=1                                                    | -0,350158208 | 0,801443 |
| P48454 | Serine/threonine-protein phosphatase 2B catalytic subunit gamma isoform OS=Homo sapiens OX=9606 GN=PPP3CC PE=1 SV=3  | -0,325831044 | 0,800793 |
| Q02878 | 60S ribosomal protein L6 OS=Homo sapiens OX=9606 GN=RPL6 PE=1 SV=3                                                   | 0,089853101  | 0,800411 |
| Q9BYD3 | 39S ribosomal protein L4, mitochondrial OS=Homo sapiens OX=9606 GN=MRPL4 PE=1 SV=1                                   | -0,349603897 | 0,800211 |
| Q8NEY1 | Neuron navigator 1 OS=Homo sapiens OX=9606 GN=NAV1 PE=1 SV=2                                                         | 0,122134441  | 0,800173 |
| Q8N8Z6 | Discoidin, CUB and LCCL domain-containing protein 1 OS=Homo sapiens OX=9606 GN=DCBLD1 PE=1 SV=2                      | 0,223301601  | 0,799385 |
| Q99798 | Aconitate hydratase, mitochondrial OS=Homo sapiens OX=9606 GN=ACO2 PE=1 SV=2                                         | 0,069754875  | 0,798909 |
| Q8TDQ7 | Glucosamine-6-phosphate isomerase 2 OS=Homo sapiens OX=9606 GN=GNPDA2 PE=1 SV=1                                      | 0,239997554  | 0,798888 |
| Q16563 | Synaptophysin-like protein 1 OS=Homo sapiens OX=9606 GN=SYPL1 PE=1 SV=1                                              | 0,196306216  | 0,798757 |
| P15121 | Aldo-keto reductase family 1 member B1 OS=Homo sapiens OX=9606 GN=AKR1B1 PE=1 SV=3                                   | 0,09621025   | 0,798679 |
| Q96S83 | Neurabin-2 OS=Homo sapiens OX=9606 GN=PPP1R9B PE=1 SV=3                                                              | -0,153038473 | 0,797885 |
| Q562R1 | Beta-actin-like protein 2 OS=Homo sapiens OX=9606 GN=ACTBL2 PE=1 SV=2                                                | -0,196066661 | 0,797654 |
| P35232 | Prohibitin OS=Homo sapiens OX=9606 GN=PHB PE=1 SV=1                                                                  | -0,092618029 | 0,797044 |
| Q13610 | Periodic tryptophan protein 1 homolog OS=Homo sapiens OX=9606 GN=PWP1 PE=1 SV=1                                      | -0,152853291 | 0,796764 |
| P52434 | DNA-directed RNA polymerases I, II, and III subunit RPABC3 OS=Homo sapiens OX=9606 GN=POLR2H PE=1 SV=4               | -0,348044684 | 0,796738 |
| Q0VGL1 | Ragulator complex protein LAMTOR4 OS=Homo sapiens OX=9606 GN=LAMTOR4 PE=1 SV=1                                       | 0,347808458  | 0,796212 |
| O75886 | Signal transducing adapter molecule 2 OS=Homo sapiens OX=9606 GN=STAM2 PE=1 SV=1                                     | -0,121603999 | 0,796084 |
| Q7KZ85 | Transcription elongation factor SPT6 OS=Homo sapiens OX=9606 GN=SUPT6H PE=1 SV=2                                     | 0,239053372  | 0,795444 |
| Q8TC05 | 5'(3')-deoxyribonucleotidase, cytosolic type OS=Homo sapiens OX=9606 GN=NTSC PE=1 SV=2                               | -0,239048176 | 0,795422 |
| O15013 | Rho guanine nucleotide exchange factor 10 OS=Homo sapiens OX=9606 GN=ARHGEF10 PE=1 SV=4                              | -0,169992296 | 0,795102 |
| P61769 | Beta-2-microglobulin OS=Homo sapiens OX=9606 GN=B2M PE=1 SV=1                                                        | -0,238831548 | 0,794633 |
| Q5T6F2 | Ubiquitin-associated protein 2 OS=Homo sapiens OX=9606 GN=UBAP2 PE=1 SV=1                                            | 0,238627472  | 0,793899 |
| Q8NC96 | Adaptin ear-binding coat-associated protein 1 OS=Homo sapiens OX=9606 GN=NECAP1 PE=1 SV=2                            | 0,188334174  | 0,793577 |
| P62979 | Ubiquitin-40S ribosomal protein S27a OS=Homo sapiens OX=9606 GN=RPS27A PE=1 SV=2                                     | -0,139452337 | 0,793575 |
| P11387 | DNA topoisomerase 1 OS=Homo sapiens OX=9606 GN=TOP1 PE=1 SV=2                                                        | 0,099483958  | 0,793273 |
| P04049 | RAF proto-oncogene serine/threonine-protein kinase OS=Homo sapiens OX=9606 GN=RAF1 PE=1 SV=1                         | 0,169566638  | 0,792811 |
| Q14156 | Protein EFR3 homolog A OS=Homo sapiens OX=9606 GN=EFR3A PE=1 SV=2                                                    | 0,346052411  | 0,792297 |
| Q9UMZ2 | Synergin gamma OS=Homo sapiens OX=9606 GN=SYNRG PE=1 SV=2                                                            | 0,442273113  | 0,790966 |
| Q15459 | Splicing factor 3A subunit 1 OS=Homo sapiens OX=9606 GN=SF3A1 PE=1 SV=1                                              | -0,088887303 | 0,790199 |
| Q01082 | Spectrin beta chain, non-erythrocytic 1 OS=Homo sapiens OX=9606 GN=SPTBN1 PE=1 SV=2                                  | -0,031564081 | 0,789838 |
| Q9HA64 | Ketosamine-3-kinase OS=Homo sapiens OX=9606 GN=FN3KRP PE=1 SV=2                                                      | -0,34462051  | 0,789102 |
| A6NCE7 | Microtubule-associated proteins 1A/1B light chain 3 beta 2 OS=Homo sapiens OX=9606 GN=MAP1LC3B2 PE=2 SV=1            | 0,181023572  | 0,789092 |
| P40616 | ADP-ribosylation factor-like protein 1 OS=Homo sapiens OX=9606 GN=ARL1 PE=1 SV=1                                     | -0,138744167 | 0,788871 |
| Q8NB90 | ATPase family protein 2 homolog OS=Homo sapiens OX=9606 GN=SPATA5 PE=1 SV=3                                          | -0,237097173 | 0,788318 |
| Q9Y608 | Leucine-rich repeat flightless-interacting protein 2 OS=Homo sapiens OX=9606 GN=LRRFIP2 PE=1 SV=1                    | 0,1384936    | 0,787209 |
| P49585 | Choline-phosphate cytidyltransferase A OS=Homo sapiens OX=9606 GN=PCYT1A PE=1 SV=2                                   | -0,102918852 | 0,785248 |
| P62241 | 40S ribosomal protein S8 OS=Homo sapiens OX=9606 GN=RPS8 PE=1 SV=2                                                   | -0,113438615 | 0,78474  |
| Q86V58 | Protein Hook homolog 3 OS=Homo sapiens OX=9606 GN=HOOK3 PE=1 SV=2                                                    | 0,091346716  | 0,784081 |
| P41208 | Centrin-2 OS=Homo sapiens OX=9606 GN=CETN2 PE=1 SV=1                                                                 | 0,235803371  | 0,783661 |
| Q9H324 | Dnaj homolog subfamily C member 5 OS=Homo sapiens OX=9606 GN=DNAJC5 PE=1 SV=1                                        | 0,447273908  | 0,782965 |
| P48058 | Glutamate receptor 4 OS=Homo sapiens OX=9606 GN=GRIA4 PE=1 SV=2                                                      | 0,234956387  | 0,780528 |
| Q96J01 | THO complex subunit 3 OS=Homo sapiens OX=9606 GN=THOC3 PE=1 SV=1                                                     | 0,234949749  | 0,780504 |
| P61803 | Dolichyl-diphosphooligosaccharide-protein glycosyltransferase subunit DAD1 OS=Homo sapiens OX=9606 GN=DAD1 PE=1 SV=3 | -0,192022746 | 0,779054 |
| O15371 | Eukaryotic translation initiation factor 3 subunit D OS=Homo sapiens OX=9606 GN=EIF3D PE=1 SV=1                      | -0,090794429 | 0,778466 |
| Q53FV1 | ORMK1-like protein 2 OS=Homo sapiens OX=9606 GN=ORMDL2 PE=1 SV=2                                                     | 0,124216942  | 0,778234 |
| Q99417 | c-Myc-binding protein OS=Homo sapiens OX=9606 GN=MYCBP PE=1 SV=3                                                     | 0,339606784  | 0,777789 |
| Q10469 | Alpha-1,6-mannosyl-glycoprotein 2-beta-N-acetylglucosaminyltransferase OS=Homo sapiens OX=9606 GN=MGAT2 PE=1 SV=1    | 0,339037103  | 0,776614 |
| Q9BZH6 | WD repeat-containing protein 11 OS=Homo sapiens OX=9606 GN=WDR11 PE=1 SV=1                                           | -0,14937248  | 0,775751 |
| Q96C36 | Pyruvate-5-carboxylate reductase 2 OS=Homo sapiens OX=9606 GN=PYR2 PE=1 SV=1                                         | -0,136741928 | 0,775607 |
| Q495W5 | Alpha-(1,3)-fucosyltransferase 11 OS=Homo sapiens OX=9606 GN=FUT11 PE=1 SV=1                                         | 0,338518952  | 0,775453 |
| Q9NWM8 | Peptidyl-prolyl cis-trans isomerase FKBP14 OS=Homo sapiens OX=9606 GN=FKBP14 PE=1 SV=1                               | 0,149283011  | 0,775213 |
| Q9HB90 | Ras-related GTP-binding protein C OS=Homo sapiens OX=9606 GN=RRAGC PE=1 SV=1                                         | -0,16625295  | 0,775026 |
| Q96HY6 | DDRKG domain-containing protein 1 OS=Homo sapiens OX=9606 GN=DDRKG1 PE=1 SV=2                                        | 0,166105414  | 0,774236 |
| Q9Y2B0 | Protein canopy homolog 2 OS=Homo sapiens OX=9606 GN=CNPY2 PE=1 SV=1                                                  | 0,126684082  | 0,77405  |
| Q9NV11 | ATP-dependent RNA helicase DDX18 OS=Homo sapiens OX=9606 GN=DDX18 PE=1 SV=2                                          | -0,190910486 | 0,773949 |
| P55039 | Developmentally-regulated GTP-binding protein 2 OS=Homo sapiens OX=9606 GN=DRG2 PE=1 SV=1                            | 0,14871046   | 0,771768 |
| Q9GZU8 | PSME3-interacting protein OS=Homo sapiens OX=9606 GN=FAM192A PE=1 SV=1                                               | -0,336769552 | 0,771503 |
| O00423 | Echinoderm microtubule-associated protein-like 1 OS=Homo sapiens OX=9606 GN=EML1 PE=1 SV=3                           | 0,232420186  | 0,771306 |
| O95183 | Vesicle-associated membrane protein 5 OS=Homo sapiens OX=9606 GN=VAMP5 PE=1 SV=1                                     | 0,336656399  | 0,771276 |
| P10244 | Myb-related protein B OS=Homo sapiens OX=9606 GN=MYBL2 PE=1 SV=1                                                     | 0,612896447  | 0,771173 |
| Q71RC2 | La-related protein 4 OS=Homo sapiens OX=9606 GN=LARP4 PE=1 SV=3                                                      | -0,232069505 | 0,770031 |
| Q2NKX8 | DNA excision repair protein ERCC-6-like OS=Homo sapiens OX=9606 GN=ERCC6L PE=1 SV=1                                  | 0,336067457  | 0,769954 |
| O94906 | Pre-mRNA-processing factor 6 OS=Homo sapiens OX=9606 GN=PRPF6 PE=1 SV=1                                              | -0,148406607 | 0,769941 |
| Q5TFE4 | 5'-nucleotidase domain-containing protein 1 OS=Homo sapiens OX=9606 GN=NTSDC1 PE=1 SV=1                              | 0,232038362  | 0,769918 |
| Q86VY4 | Testis-specific Y-encoded-like protein 5 OS=Homo sapiens OX=9606 GN=TSPYL5 PE=1 SV=2                                 | 0,124846706  | 0,768136 |
| Q9NWW4 | Histone PARylation factor 1 OS=Homo sapiens OX=9606 GN=HPF1 PE=1 SV=2                                                | 0,278214505  | 0,767983 |
| Q15287 | RNA-binding protein with serine-rich domain 1 OS=Homo sapiens OX=9606 GN=RNPS1 PE=1 SV=1                             | -0,231334889 | 0,767361 |
| Q9H3M7 | Thioredoxin-interacting protein OS=Homo sapiens OX=9606 GN=TXNIP PE=1 SV=1                                           | 0,334583287  | 0,766621 |
| Q9NZN5 | Rho guanine nucleotide exchange factor 12 OS=Homo sapiens OX=9606 GN=ARHGEF12 PE=1 SV=1                              | 0,334551437  | 0,766549 |
| Q75382 | Tripartite motif-containing protein 3 OS=Homo sapiens OX=9606 GN=TRIM3 PE=1 SV=2                                     | 0,189276256  | 0,766458 |
| Q9H832 | Ubiquitin-conjugating enzyme E2 Z OS=Homo sapiens OX=9606 GN=UBE2Z PE=1 SV=2                                         | 0,125405461  | 0,764492 |
| Q5VIR6 | Vacuolar protein sorting-associated protein 53 homolog OS=Homo sapiens OX=9606 GN=VPS53 PE=1 SV=1                    | 0,164312531  | 0,764646 |
| Q53T59 | HCLS1-binding protein 3 OS=Homo sapiens OX=9606 GN=HS1BP3 PE=1 SV=1                                                  | -0,876415499 | 0,764492 |
| Q9H4M3 | F-box only protein 44 OS=Homo sapiens OX=9606 GN=FBXO44 PE=1 SV=3                                                    | 0,182275311  | 0,764416 |
| Q9Y287 | Integral membrane protein 2B OS=Homo sapiens OX=9606 GN=ITM2B PE=1 SV=1                                              | -0,333002262 | 0,763067 |
| Q9P0L0 | Vesicle-associated membrane protein-associated protein A OS=Homo sapiens OX=9606 GN=VAPA PE=1 SV=3                   | 0,10038269   | 0,762463 |

|        |                                                                                                                         |              |          |
|--------|-------------------------------------------------------------------------------------------------------------------------|--------------|----------|
| Q9C037 | E3 ubiquitin-protein ligase TRIM4 OS=Homo sapiens OX=9606 GN=TRIM4 PE=1 SV=2                                            | 0,229962461  | 0,762375 |
| Q9H2K8 | Serine/threonine-protein kinase TAO3 OS=Homo sapiens OX=9606 GN=TAOK3 PE=1 SV=2                                         | 0,332379783  | 0,761667 |
| Q9UB9Y | Heat shock protein beta-7 OS=Homo sapiens OX=9606 GN=HSPB7 PE=1 SV=1                                                    | -0,105062247 | 0,761635 |
| Q9HB07 | UPF0160 protein MYG1, mitochondrial OS=Homo sapiens OX=9606 GN=C12orf10 PE=1 SV=2                                       | -0,163497357 | 0,760293 |
| Q13242 | Serine/arginine-rich splicing factor 9 OS=Homo sapiens OX=9606 GN=SRSF9 PE=1 SV=1                                       | 0,124720324  | 0,760038 |
| P48059 | LIM and senescent cell antigen-like-containing domain protein 1 OS=Homo sapiens OX=9606 GN=LIMS1 PE=1 SV=4              | -0,095885507 | 0,759472 |
| Q14684 | Ribosomal RNA processing protein 1 homolog B OS=Homo sapiens OX=9606 GN=RRP1B PE=1 SV=3                                 | -0,064104566 | 0,759044 |
| P68371 | Tubulin beta-4B chain OS=Homo sapiens OX=9606 GN=TUBB4B PE=1 SV=1                                                       | -0,053081144 | 0,758989 |
| P53999 | Activated RNA polymerase II transcriptional coactivator p15 OS=Homo sapiens OX=9606 GN=SUB1 PE=1 SV=3                   | -0,163060562 | 0,757962 |
| O75439 | Mitochondrial-processing peptidase subunit beta OS=Homo sapiens OX=9606 GN=PMPCB PE=1 SV=2                              | -0,095711056 | 0,757843 |
| P12270 | Nucleoprotein TPR OS=Homo sapiens OX=9606 GN=TPR PE=1 SV=3                                                              | 0,068023239  | 0,756983 |
| Q9UHL4 | Dipeptidyl peptidase 2 OS=Homo sapiens OX=9606 GN=DPP7 PE=1 SV=3                                                        | -0,228461662 | 0,756925 |
| P04062 | Lysosomal acid glucosylceramidase OS=Homo sapiens OX=9606 GN=GBA PE=1 SV=3                                              | -0,116461954 | 0,756712 |
| O14737 | Programmed cell death protein 5 OS=Homo sapiens OX=9606 GN=PCD5 PE=1 SV=3                                               | 0,14602286   | 0,755641 |
| P07741 | Adenine phosphoribosyltransferase OS=Homo sapiens OX=9606 GN=APRT PE=1 SV=2                                             | -0,104299482 | 0,755136 |
| Q9H2H8 | Peptidyl-prolyl cis-trans isomerase-like 3 OS=Homo sapiens OX=9606 GN=PP1L3 PE=1 SV=1                                   | -0,22794328  | 0,755044 |
| Q16891 | MICOS complex subunit MIC60 OS=Homo sapiens OX=9606 GN=IMMT PE=1 SV=1                                                   | -0,069224561 | 0,753855 |
| Q5R314 | Tetratricopeptide repeat protein 38 OS=Homo sapiens OX=9606 GN=TT38 PE=1 SV=1                                           | -0,184219479 | 0,753236 |
| Q9H5N1 | Rab GTPase-binding effector protein 2 OS=Homo sapiens OX=9606 GN=RABEP2 PE=1 SV=2                                       | -0,18630711  | 0,752875 |
| Q8TBC4 | NEDD8-activating enzyme E1 catalytic subunit OS=Homo sapiens OX=9606 GN=UBA3 PE=1 SV=2                                  | -0,123581097 | 0,751937 |
| Q8WVLS | Protein phosphatase Slingshot homolog 1 OS=Homo sapiens OX=9606 GN=SSH1 PE=1 SV=2                                       | 0,456398402  | 0,750424 |
| Q9Y371 | Endophilin-B1 OS=Homo sapiens OX=9606 GN=SH3GLB1 PE=1 SV=1                                                              | -0,123311439 | 0,750022 |
| Q8WXA3 | RUN and FYVE domain-containing protein 2 OS=Homo sapiens OX=9606 GN=RUFY2 PE=1 SV=3                                     | -0,327188383 | 0,749968 |
| P61254 | 60S ribosomal protein L26 OS=Homo sapiens OX=9606 GN=RPL26 PE=1 SV=1                                                    | -0,123302268 | 0,749957 |
| Q86V21 | Acetoacetyl-CoA synthetase OS=Homo sapiens OX=9606 GN=AACS PE=1 SV=1                                                    | -0,092557287 | 0,749427 |
| Q7LBR1 | Charged multivesicular body protein 1b OS=Homo sapiens OX=9606 GN=CHMP1B PE=1 SV=1                                      | 0,185525335  | 0,749304 |
| P12111 | Collagen alpha-3(VI) chain OS=Homo sapiens OX=9606 GN=COL6A3 PE=1 SV=5                                                  | -0,030972645 | 0,749156 |
| A6NHL2 | Tubulin alpha chain-like 3 OS=Homo sapiens OX=9606 GN=TUBAL3 PE=1 SV=2                                                  | -0,123179427 | 0,749085 |
| Q6ZT12 | E3 ubiquitin-protein ligase UBR3 OS=Homo sapiens OX=9606 GN=UBR3 PE=2 SV=2                                              | 0,342327216  | 0,748976 |
| O95573 | Long-chain-fatty-acid-CoA ligase 3 OS=Homo sapiens OX=9606 GN=ACSL3 PE=1 SV=3                                           | 0,094744076  | 0,748828 |
| Q4G0F5 | Vacuolar protein sorting-associated protein 26B OS=Homo sapiens OX=9606 GN=VPS26B PE=1 SV=2                             | -0,13242879  | 0,747204 |
| Q9HAT2 | Sialate O-acetyltransferase OS=Homo sapiens OX=9606 GN=SIAE PE=1 SV=1                                                   | -0,225778364 | 0,747188 |
| P07711 | Cathepsin L1 OS=Homo sapiens OX=9606 GN=CTSL PE=1 SV=2                                                                  | -0,184769787 | 0,745856 |
| Q9Y496 | Kinesin-like protein KIF3A OS=Homo sapiens OX=9606 GN=KIF3A PE=1 SV=4                                                   | 0,325088373  | 0,745226 |
| O43318 | Mitogen-activated protein kinase kinase kinase 7 OS=Homo sapiens OX=9606 GN=MAP3K7 PE=1 SV=1                            | 0,419394391  | 0,744228 |
| Q9NW13 | RNA-binding protein 28 OS=Homo sapiens OX=9606 GN=RBM28 PE=1 SV=3                                                       | 0,248282198  | 0,743995 |
| P60983 | Glia maturation factor beta OS=Homo sapiens OX=9606 GN=GMFB PE=1 SV=2                                                   | 0,160320281  | 0,743371 |
| Q8N8A2 | Serine/threonine-protein phosphatase 6 regulatory ankyrin repeat subunit B OS=Homo sapiens OX=9606 GN=ANKRD44 PE=1 SV=3 | -0,117267218 | 0,742716 |
| Q9UKY7 | Protein CDV3 homolog OS=Homo sapiens OX=9606 GN=CDV3 PE=1 SV=1                                                          | 0,102541244  | 0,740206 |
| Q86Y07 | Serine/threonine-protein kinase VRK2 OS=Homo sapiens OX=9606 GN=VRK2 PE=1 SV=3                                          | -0,173243148 | 0,738876 |
| Q9UJ50 | Calcium-binding mitochondrial carrier protein Aralar2 OS=Homo sapiens OX=9606 GN=SLC25A13 PE=1 SV=2                     | 0,183195031  | 0,738677 |
| P80217 | Interferon-induced 35 kDa protein OS=Homo sapiens OX=9606 GN=IFI35 PE=1 SV=5                                            | -0,808435368 | 0,738428 |
| Q5T0F9 | Coiled-coil and C2 domain-containing protein 1B OS=Homo sapiens OX=9606 GN=CC2D1B PE=1 SV=1                             | -0,223096457 | 0,737465 |
| O43823 | A-kinase anchor protein 8 OS=Homo sapiens OX=9606 GN=AKAP8 PE=1 SV=1                                                    | -0,222812463 | 0,736436 |
| Q9H2V7 | Protein spinstar homolog 1 OS=Homo sapiens OX=9606 GN=SPNS1 PE=1 SV=1                                                   | 0,603898133  | 0,735446 |
| O00422 | Histone deacetylase complex subunit SAP18 OS=Homo sapiens OX=9606 GN=SAP18 PE=1 SV=1                                    | 0,222431794  | 0,735057 |
| Q13907 | Isopentenyl-diphosphate Delta-isomerase 1 OS=Homo sapiens OX=9606 GN=IDI1 PE=1 SV=2                                     | -0,18238137  | 0,734971 |
| P29373 | Cellular retinoic acid-binding protein 2 OS=Homo sapiens OX=9606 GN=CRABP2 PE=1 SV=2                                    | -0,142276408 | 0,733278 |
| Q9P2X3 | Protein IMPACT OS=Homo sapiens OX=9606 GN=IMPACT PE=1 SV=2                                                              | -0,319793207 | 0,733242 |
| Q9NX24 | H/ACA ribonucleoprotein complex subunit 2 OS=Homo sapiens OX=9606 GN=NHP2 PE=1 SV=1                                     | 0,221668586  | 0,732292 |
| P45880 | Voltage-dependent anion-selective channel protein 2 OS=Homo sapiens OX=9606 GN=VDAC2 PE=1 SV=2                          | -0,101567213 | 0,731967 |
| O60313 | Dynamin-like 120 kDa protein, mitochondrial OS=Homo sapiens OX=9606 GN=OPA1 PE=1 SV=3                                   | 0,113170166  | 0,731758 |
| P20929 | Nebulin OS=Homo sapiens OX=9606 GN=NEB PE=1 SV=5                                                                        | -0,226874976 | 0,731749 |
| Q9Y305 | Acyloxy-coenzyme A thioesterase 9, mitochondrial OS=Homo sapiens OX=9606 GN=ACOT9 PE=1 SV=2                             | 0,101514448  | 0,731522 |
| Q8NC56 | LEM domain-containing protein 2 OS=Homo sapiens OX=9606 GN=LEMD2 PE=1 SV=1                                              | -0,157712119 | 0,729532 |
| Q9H1A4 | Anaphase-promoting complex subunit 1 OS=Homo sapiens OX=9606 GN=ANAPC1 PE=1 SV=1                                        | -0,181083892 | 0,729068 |
| P58215 | Lysyl oxidase homolog 3 OS=Homo sapiens OX=9606 GN=LOXL3 PE=1 SV=1                                                      | 0,220720499  | 0,728859 |
| O60565 | Gremlin-1 OS=Homo sapiens OX=9606 GN=GREM1 PE=1 SV=1                                                                    | -0,352298205 | 0,728696 |
| P26885 | Peptidyl-prolyl cis-trans isomerase FKBP2 OS=Homo sapiens OX=9606 GN=FKBP2 PE=1 SV=2                                    | 0,157361989  | 0,727678 |
| Q9UIC8 | Leucine carboxyl methyltransferase 1 OS=Homo sapiens OX=9606 GN=LCMT1 PE=1 SV=2                                         | -0,317333283 | 0,727662 |
| P62917 | 60S ribosomal protein L8 OS=Homo sapiens OX=9606 GN=RPL8 PE=1 SV=2                                                      | -0,088872559 | 0,727252 |
| Q96T37 | RNA-binding protein 15 OS=Homo sapiens OX=9606 GN=RBM15 PE=1 SV=2                                                       | 0,316825574  | 0,726509 |
| Q9Z266 | Peroxidase homolog OS=Homo sapiens OX=9606 GN=PXDN PE=1 SV=2                                                            | -0,11237683  | 0,725774 |
| O00273 | DNA fragmentation factor subunit alpha OS=Homo sapiens OX=9606 GN=DFFA PE=1 SV=1                                        | 0,21962793   | 0,724904 |
| O15037 | Protein KHNYN OS=Homo sapiens OX=9606 GN=KHNYN PE=1 SV=3                                                                | -0,384773596 | 0,724476 |
| O15085 | Rho guanine nucleotide exchange factor 11 OS=Homo sapiens OX=9606 GN=ARHGEF11 PE=1 SV=1                                 | -0,156510654 | 0,724313 |
| Q9UKM9 | RNA-binding protein Raly OS=Homo sapiens OX=9606 GN=RALY PE=1 SV=1                                                      | 0,128910863  | 0,72421  |
| P48735 | Isocitrate dehydrogenase [NADP], mitochondrial OS=Homo sapiens OX=9606 GN=IDH2 PE=1 SV=2                                | -0,092031852 | 0,723369 |
| Q517N3 | Kin motif and ankyrin repeat domain-containing protein 4 OS=Homo sapiens OX=9606 GN=KANK4 PE=1 SV=1                     | 0,315281584  | 0,723002 |
| Q86SR1 | Polypeptide N-acetylgalactosaminyltransferase 10 OS=Homo sapiens OX=9606 GN=GALNT10 PE=1 SV=2                           | 0,128679457  | 0,722703 |
| P43304 | Glycerol-3-phosphate dehydrogenase, mitochondrial OS=Homo sapiens OX=9606 GN=GDPD2 PE=1 SV=3                            | -0,068260742 | 0,722489 |
| Q13867 | Bleomycin hydrolase OS=Homo sapiens OX=9606 GN=BLMH PE=1 SV=1                                                           | -0,140375046 | 0,721981 |
| P80404 | 4-aminobutyrate aminotransferase, mitochondrial OS=Homo sapiens OX=9606 GN=ABAT PE=1 SV=3                               | 0,218787094  | 0,721861 |
| Q9H0U3 | Magnesium transporter protein 1 OS=Homo sapiens OX=9606 GN=MAGT1 PE=1 SV=1                                              | 0,218660699  | 0,721404 |
| Q13641 | Trophoblast glycoprotein OS=Homo sapiens OX=9606 GN=TPBG PE=1 SV=1                                                      | -0,140231769 | 0,721132 |
| Q9NVV8 | BRIS1 and BRCA1-A complex member 1 OS=Homo sapiens OX=9606 GN=BABAM1 PE=1 SV=1                                          | -0,218529704 | 0,72093  |
| Q14203 | Dynactin subunit 1 OS=Homo sapiens OX=9606 GN=DCTN1 PE=1 SV=3                                                           | -0,047797455 | 0,720446 |
| Q9BZQ8 | Protein Niban OS=Homo sapiens OX=9606 GN=FAM129A PE=1 SV=1                                                              | -0,13998301  | 0,719657 |
| P28074 | Proteasome subunit beta type-5 OS=Homo sapiens OX=9606 GN=PSMB5 PE=1 SV=3                                               | -0,095514522 | 0,719201 |
| Q14690 | Protein RRP5 homolog OS=Homo sapiens OX=9606 GN=PCDC11 PE=1 SV=3                                                        | -0,161695056 | 0,719113 |
| Q96EK6 | Glucosamine 6-phosphate N-acetyltransferase OS=Homo sapiens OX=9606 GN=GPNAT1 PE=1 SV=1                                 | -0,118839079 | 0,718428 |
| P78316 | Nucleolar protein 14 OS=Homo sapiens OX=9606 GN=NOP14 PE=1 SV=3                                                         | 0,28006929   | 0,715123 |
| Q9H936 | Mitochondrial glutamate carrier 1 OS=Homo sapiens OX=9606 GN=SLC25A22 PE=1 SV=1                                         | -0,177961646 | 0,714893 |
| Q9HD20 | Manganese-transporting ATPase 13A1 OS=Homo sapiens OX=9606 GN=ATP13A1 PE=1 SV=2                                         | -0,081641776 | 0,7147   |
| P49184 | Deoxyribonuclease-1-like 1 OS=Homo sapiens OX=9606 GN=DNASE1L1 PE=1 SV=1                                                | -0,311369634 | 0,714102 |
| Q9UI03 | Vacuolar protein sorting-associated protein 51 homolog OS=Homo sapiens OX=9606 GN=VPS51 PE=1 SV=2                       | -0,177757867 | 0,713969 |
| P04745 | Alpha-amylase 1 OS=Homo sapiens OX=9606 GN=AMY1A PE=1 SV=2                                                              | -0,348047865 | 0,713619 |
| Q9UIG0 | Tyrosine-protein kinase BAZ1B OS=Homo sapiens OX=9606 GN=BAZ1B PE=1 SV=2                                                | -0,310551997 | 0,71224  |
| P06899 | Histone H2B type 1-J OS=Homo sapiens OX=9606 GN=HIST1H2BJ PE=1 SV=3                                                     | 1,77219416   | 0,711946 |
| O00165 | HCLS1-associated protein X-1 OS=Homo sapiens OX=9606 GN=HAX1 PE=1 SV=2                                                  | -0,164960276 | 0,710919 |
| Q9BZQ6 | ER degradation-enhancing alpha-mannosidase-like protein 3 OS=Homo sapiens OX=9606 GN=EDEM3 PE=1 SV=2                    | -0,176932997 | 0,710232 |
| P05161 | Ubiquitin-like protein ISG15 OS=Homo sapiens OX=9606 GN=ISG15 PE=1 SV=5                                                 | 0,176683521  | 0,709102 |
| Q93009 | Ubiquitin carboxyl-terminal hydrolase 7 OS=Homo sapiens OX=9606 GN=USP7 PE=1 SV=2                                       | 0,078549236  | 0,708865 |
| Q9Y5R8 | Trafficking protein particle complex subunit 1 OS=Homo sapiens OX=9606 GN=TRAPP1 PE=1 SV=1                              | -0,308568518 | 0,707718 |
| O15258 | Protein RER1 OS=Homo sapiens OX=9606 GN=RER1 PE=1 SV=1                                                                  | 0,126342943  | 0,707525 |
| Q9UB58 | E3 ubiquitin-protein ligase RNF14 OS=Homo sapiens OX=9606 GN=RNFB14 PE=1 SV=1                                           | -0,153520838 | 0,707395 |
| Q9UBV8 | Peflin OS=Homo sapiens OX=9606 GN=PEF1 PE=1 SV=1                                                                        | -0,214762994 | 0,707314 |
| Q96EL3 | 39S ribosomal protein L53, mitochondrial OS=Homo sapiens OX=9606 GN=MRPL53 PE=1 SV=1                                    | 0,569947465  | 0,705804 |

|         |                                                                                                                                  |              |          |
|---------|----------------------------------------------------------------------------------------------------------------------------------|--------------|----------|
| Q9Y6W3  | Calpain-7 OS=Homo sapiens OX=9606 GN=CAPN7 PE=1 SV=1                                                                             | -0,21843731  | 0,705075 |
| Q9S219  | Sorting nexin-4 OS=Homo sapiens OX=9606 GN=SNX4 PE=1 SV=1                                                                        | 0,175759073  | 0,704918 |
| Q96FL2  | Dynein light chain 2, cytoplasmic OS=Homo sapiens OX=9606 GN=DYNLL2 PE=1 SV=1                                                    | -0,137478199 | 0,70484  |
| O75251  | NADH dehydrogenase [ubiquinone] iron-sulfur protein 7, mitochondrial OS=Homo sapiens OX=9606 GN=NDUFS7 PE=1 SV=3                 | 0,307255734  | 0,704723 |
| Q8NHU6  | Tudor domain-containing protein 7 OS=Homo sapiens OX=9606 GN=TDRD7 PE=1 SV=2                                                     | -1,152514642 | 0,70371  |
| Q96CW5  | Gamma-tubulin complex component 3 OS=Homo sapiens OX=9606 GN=TUBGCP3 PE=1 SV=2                                                   | 0,2723009    | 0,703628 |
| Q8N1G4  | Leucine-rich repeat-containing protein 47 OS=Homo sapiens OX=9606 GN=LRRCA47 PE=1 SV=1                                           | -0,086257125 | 0,702207 |
| Q13868  | Exosome complex component RRP4 OS=Homo sapiens OX=9606 GN=EXOSC2 PE=1 SV=2                                                       | -0,245345229 | 0,700966 |
| O43390  | Heterogeneous nuclear ribonucleoprotein R OS=Homo sapiens OX=9606 GN=HNRNP1 PE=1 SV=1                                            | 0,073313066  | 0,699623 |
| Q9NR28  | Diablo homolog, mitochondrial OS=Homo sapiens OX=9606 GN=DIABLO PE=1 SV=1                                                        | 0,212361923  | 0,698645 |
| O14908  | PDZ domain-containing protein GIPC1 OS=Homo sapiens OX=9606 GN=GIPC1 PE=1 SV=2                                                   | 0,09312859   | 0,698227 |
| P62072  | Mitochondrial import inner membrane translocase subunit Tim10 OS=Homo sapiens OX=9606 GN=TIMM10 PE=1 SV=1                        | -0,212199291 | 0,698058 |
| Q9Y4K0  | Lysyl oxidase homolog 2 OS=Homo sapiens OX=9606 GN=LOXL2 PE=1 SV=1                                                               | 0,136208003  | 0,69735  |
| Q96G03  | Phosphoglucomutase-2 OS=Homo sapiens OX=9606 GN=PGM2 PE=1 SV=4                                                                   | 0,073009046  | 0,696219 |
| Q9NTX5  | Ethylmalonyl-CoA decarboxylase OS=Homo sapiens OX=9606 GN=ECHDC1 PE=1 SV=2                                                       | 0,173663976  | 0,69545  |
| Q9BRF8  | Serine/threonine-protein phosphatase CPPED1 OS=Homo sapiens OX=9606 GN=CPPED1 PE=1 SV=3                                          | -0,115526626 | 0,695228 |
| Q6Z517  | Rho family-interacting cell polarization regulator 1 OS=Homo sapiens OX=9606 GN=RIPOR1 PE=1 SV=1                                 | -0,124177541 | 0,693521 |
| Q9GZP4  | PITH domain-containing protein 1 OS=Homo sapiens OX=9606 GN=PITHD1 PE=1 SV=1                                                     | -0,30228656  | 0,693365 |
| P28070  | Proteasome subunit beta type-4 OS=Homo sapiens OX=9606 GN=PSMB4 PE=1 SV=4                                                        | -0,115218863 | 0,693081 |
| Q9Y5X3  | Sorting nexin-5 OS=Homo sapiens OX=9606 GN=SNX5 PE=1 SV=1                                                                        | -0,124034573 | 0,692599 |
| Q53HC9  | EARP and GARP complex-interacting protein 1 OS=Homo sapiens OX=9606 GN=EIPR1 PE=1 SV=2                                           | 0,301864393  | 0,692399 |
| P45954  | Short/branched chain specific acyl-CoA dehydrogenase, mitochondrial OS=Homo sapiens OX=9606 GN=ACADS8 PE=1 SV=1                  | -0,301404979 | 0,691347 |
| Q96M27  | Protein PRRC1 OS=Homo sapiens OX=9606 GN=PRRC1 PE=1 SV=1                                                                         | 0,101658538  | 0,690201 |
| O60828  | Polyglutamine-binding protein 1 OS=Homo sapiens OX=9606 GN=PQB1 PE=1 SV=1                                                        | 0,209919427  | 0,689835 |
| Q9BZL6  | Serine/threonine-protein kinase D2 OS=Homo sapiens OX=9606 GN=PRKD2 PE=1 SV=3                                                    | 0,343361075  | 0,689571 |
| Q8N2G8  | GH3 domain-containing protein OS=Homo sapiens OX=9606 GN=GHDC PE=1 SV=2                                                          | -0,278298879 | 0,688026 |
| Q5VU43  | Myomegalin OS=Homo sapiens OX=9606 GN=PDE4DIP PE=1 SV=3                                                                          | 0,149381307  | 0,685656 |
| P36404  | ADP-ribosylation factor-like protein 2 OS=Homo sapiens OX=9606 GN=ARL2 PE=1 SV=4                                                 | -0,208604728 | 0,685097 |
| Q9Z599  | Septin-8 OS=Homo sapiens OX=9606 GN=SEPTIN8 PE=1 SV=4                                                                            | -0,122858016 | 0,685017 |
| Q9UKA4  | A-kinase anchor protein 11 OS=Homo sapiens OX=9606 GN=AKAP11 PE=1 SV=1                                                           | 0,298309514  | 0,684254 |
| Q5T1J5  | Putative coiled-coil-helix-coiled-coil-helix domain-containing protein CHCHD2P9, mitochondrial OS=Homo sapiens OX=9606 GN=CHCHD. | 0,298256968  | 0,684134 |
| Q9NPL8  | Complex I-assembly factor TIMMDC1, mitochondrial OS=Homo sapiens OX=9606 GN=TIMMDC1 PE=1 SV=2                                    | 0,298199414  | 0,684002 |
| Q969T9  | WW domain-binding protein 2 OS=Homo sapiens OX=9606 GN=WBP2 PE=1 SV=1                                                            | -0,208119629 | 0,683349 |
| P19971  | Ethandine phosphorylase OS=Homo sapiens OX=9606 GN=TYMP PE=1 SV=2                                                                | 0,208063784  | 0,683148 |
| Q6P2E9  | Enhancer of mRNA-decapping protein 4 OS=Homo sapiens OX=9606 GN=EDC4 PE=1 SV=1                                                   | 0,081228032  | 0,68289  |
| Q96D46  | 60S ribosomal export protein NMD3 OS=Homo sapiens OX=9606 GN=NMD3 PE=1 SV=1                                                      | -0,170821293 | 0,682634 |
| Q6NUQ1  | RAD50-interacting protein 1 OS=Homo sapiens OX=9606 GN=RINT1 PE=1 SV=1                                                           | 0,297344857  | 0,682041 |
| Q13057  | Bifunctional coenzyme A synthase OS=Homo sapiens OX=9606 GN=COASY PE=1 SV=4                                                      | 0,207551877  | 0,681305 |
| Q96DG6  | Carboxymethylenebutenolidase homolog OS=Homo sapiens OX=9606 GN=CMBL PE=1 SV=1                                                   | -0,148544451 | 0,681276 |
| Q96PY5  | Formin-like protein 2 OS=Homo sapiens OX=9606 GN=FMNL2 PE=1 SV=3                                                                 | 0,964896958  | 0,680624 |
| A1A456  | Rho GTPase-activating protein 10 OS=Homo sapiens OX=9606 GN=ARHGAP10 PE=1 SV=1                                                   | -0,101092416 | 0,680123 |
| P17858  | ATP-dependent 6-phosphofructokinase, liver type OS=Homo sapiens OX=9606 GN=PFKL PE=1 SV=6                                        | -0,073514532 | 0,679171 |
| P35869  | Aryl hydrocarbon receptor OS=Homo sapiens OX=9606 GN=AHR PE=1 SV=2                                                               | -0,147972269 | 0,678285 |
| O43294  | Transforming growth factor beta-1-induced transcript 1 protein OS=Homo sapiens OX=9606 GN=TGFBI1 PE=1 SV=2                       | 0,083660707  | 0,677561 |
| P23458  | Tyrosine-protein kinase JAK1 OS=Homo sapiens OX=9606 GN=JAK1 PE=1 SV=2                                                           | 0,105775276  | 0,676421 |
| P10123  | Alpha-2-macroglobulin OS=Homo sapiens OX=9606 GN=A2M PE=1 SV=3                                                                   | 0,121458309  | 0,676021 |
| P35354  | Prostaglandin G/H synthase 2 OS=Homo sapiens OX=9606 GN=PTGS2 PE=1 SV=2                                                          | -0,324325661 | 0,675476 |
| P33897  | ATP-binding cassette sub-family D member 1 OS=Homo sapiens OX=9606 GN=ABCD1 PE=1 SV=2                                            | -0,294391629 | 0,675261 |
| P53701  | Cytochrome c-type heme lyase OS=Homo sapiens OX=9606 GN=HCCS PE=1 SV=1                                                           | 0,147340465  | 0,674984 |
| Q92804  | TATA-binding protein-associated factor 2N OS=Homo sapiens OX=9606 GN=TAFA15 PE=1 SV=1                                            | 0,294115084  | 0,674625 |
| Q00653  | Nuclear factor NF-kappa-B p100 subunit OS=Homo sapiens OX=9606 GN=NFKB2 PE=1 SV=4                                                | 0,205663946  | 0,674509 |
| O60934  | Nibrin OS=Homo sapiens OX=9606 GN=NBN PE=1 SV=1                                                                                  | -0,293946294 | 0,674237 |
| Q12800  | Alpha-globin transcription factor CP2 OS=Homo sapiens OX=9606 GN=TFCP2 PE=1 SV=2                                                 | 0,205567672  | 0,674162 |
| Q46176  | Acyl-CoA synthetase family member 3, mitochondrial OS=Homo sapiens OX=9606 GN=ACSF3 PE=1 SV=3                                    | 0,293451145  | 0,673099 |
| Q9H0V1  | Transmembrane protein 168 OS=Homo sapiens OX=9606 GN=TMEM168 PE=2 SV=2                                                           | 0,334403978  | 0,672191 |
| Q92574  | Hamartin OS=Homo sapiens OX=9606 GN=TSC1 PE=1 SV=2                                                                               | 0,292845267  | 0,671706 |
| P42771  | Cyclin-dependent kinase inhibitor 2A OS=Homo sapiens OX=9606 GN=CDKN2A PE=1 SV=2                                                 | -0,204875112 | 0,671671 |
| P23193  | Transcription elongation factor A protein 1 OS=Homo sapiens OX=9606 GN=TCEA1 PE=1 SV=2                                           | 0,099224729  | 0,671032 |
| P54687  | Branched-chain-amino-acid aminotransferase, cytosolic OS=Homo sapiens OX=9606 GN=BCAT1 PE=1 SV=3                                 | -0,111929023 | 0,670225 |
| P35052  | Glypican-1 OS=Homo sapiens OX=9606 GN=GPC1 PE=1 SV=2                                                                             | 0,08983384   | 0,669513 |
| P62070  | Ras-related protein R-Ras2 OS=Homo sapiens OX=9606 GN=RRAS2 PE=1 SV=1                                                            | 0,120318048  | 0,668712 |
| Q92616  | elf-2-alpha kinase activator GCN1 OS=Homo sapiens OX=9606 GN=GCN1 PE=1 SV=6                                                      | -0,031788074 | 0,668647 |
| Q8I2H2  | 5'-3' exoribonuclease 1 OS=Homo sapiens OX=9606 GN=XRN1 PE=1 SV=1                                                                | -0,167687021 | 0,668546 |
| P41226  | Ubiquitin-like modifier-activating enzyme 7 OS=Homo sapiens OX=9606 GN=UBA7 PE=1 SV=2                                            | -0,291237918 | 0,668009 |
| Q92636  | Protein FAN OS=Homo sapiens OX=9606 GN=NSMAF PE=1 SV=2                                                                           | 0,29049652   | 0,666302 |
| P52907  | F-actin-capping protein subunit alpha-1 OS=Homo sapiens OX=9606 GN=CAPZA1 PE=1 SV=3                                              | -0,093641889 | 0,665767 |
| P06744  | Glucose-6-phosphate isomerase OS=Homo sapiens OX=9606 GN=GPI PE=1 SV=4                                                           | 0,07026803   | 0,665719 |
| P08581  | Hepatocyte growth factor receptor OS=Homo sapiens OX=9606 GN=MET PE=1 SV=4                                                       | 0,208342875  | 0,664893 |
| Q9NXV6  | CDKN2A-interacting protein OS=Homo sapiens OX=9606 GN=CDKN2AIP PE=1 SV=3                                                         | 0,145322436  | 0,664462 |
| Q13308  | Inactive tyrosine-protein kinase 7 OS=Homo sapiens OX=9606 GN=PTK7 PE=1 SV=2                                                     | -0,093321244 | 0,663121 |
| Q8WWWB7 | Glycosylated lysosomal membrane protein OS=Homo sapiens OX=9606 GN=GLMP PE=1 SV=1                                                | -0,201799287 | 0,660616 |
| Q9Y6K8  | Adenylate kinase isoenzyme 5 OS=Homo sapiens OX=9606 GN=AK5 PE=1 SV=2                                                            | -0,261077665 | 0,660179 |
| P48509  | CD151 antigen OS=Homo sapiens OX=9606 GN=CD151 PE=1 SV=3                                                                         | 0,118872432  | 0,659469 |
| Q99816  | Tumor susceptibility gene 101 protein OS=Homo sapiens OX=9606 GN=TSG101 PE=1 SV=2                                                | 0,103385178  | 0,658751 |
| Q92575  | UBX domain-containing protein 4 OS=Homo sapiens OX=9606 GN=UBXN4 PE=1 SV=2                                                       | -0,165438525 | 0,658467 |
| O94822  | E3 ubiquitin-protein ligase listerin OS=Homo sapiens OX=9606 GN=LTN1 PE=1 SV=6                                                   | -0,286473691 | 0,657033 |
| Q0IIM8  | TBC1 domain family member 8B OS=Homo sapiens OX=9606 GN=TBC1D8B PE=1 SV=2                                                        | -0,200798765 | 0,657024 |
| Q99758  | ATP-binding cassette sub-family A member 3 OS=Homo sapiens OX=9606 GN=ABCA3 PE=1 SV=2                                            | -0,265133283 | 0,656932 |
| Q9Y5J9  | Mitochondrial import inner membrane translocase subunit Tim8 B OS=Homo sapiens OX=9606 GN=TIMM8B PE=1 SV=1                       | -0,072532633 | 0,656358 |
| A6NM62  | Leucine-rich repeat-containing protein 53 OS=Homo sapiens OX=9606 GN=LRRCS3 PE=4 SV=2                                            | 0,421759764  | 0,655742 |
| P71014  | Probable ATP-dependent RNA helicase DDX46 OS=Homo sapiens OX=9606 GN=DDX46 PE=1 SV=2                                             | 0,097265623  | 0,655694 |
| Q27105  | Erythrocyte band 7 integral membrane protein OS=Homo sapiens OX=9606 GN=STOM PE=1 SV=3                                           | 0,109753936  | 0,655208 |
| P51116  | Fragile X mental retardation syndrome-related protein 2 OS=Homo sapiens OX=9606 GN=FXR2 PE=1 SV=2                                | 0,109708004  | 0,654891 |
| P25787  | Proteasome subunit alpha type-2 OS=Homo sapiens OX=9606 GN=PSMA2 PE=1 SV=2                                                       | 0,118057371  | 0,654269 |
| Q27181  | Inverted formin-2 OS=Homo sapiens OX=9606 GN=INF2 PE=1 SV=2                                                                      | 0,054649776  | 0,653023 |
| Q8WWW12 | PEST proteolytic signal-containing nuclear protein OS=Homo sapiens OX=9606 GN=PCNP PE=1 SV=2                                     | 0,143050509  | 0,652653 |
| Q96QD9  | UAP56-interacting factor OS=Homo sapiens OX=9606 GN=FYTTD1 PE=1 SV=3                                                             | -0,199567415 | 0,652605 |
| P01111  | GTPase NRas OS=Homo sapiens OX=9606 GN=NRAS PE=1 SV=1                                                                            | -0,128413831 | 0,651751 |
| Q16576  | Histone-binding protein RBBP7 OS=Homo sapiens OX=9606 GN=RBBP7 PE=1 SV=1                                                         | -0,080897139 | 0,651565 |
| Q9BZJ0  | Crooked neck-like protein 1 OS=Homo sapiens OX=9606 GN=CRNKL1 PE=1 SV=4                                                          | 0,283787064  | 0,650832 |
| O15078  | Centrosomal protein of 290 kDa OS=Homo sapiens OX=9606 GN=CEP290 PE=1 SV=2                                                       | 0,149774384  | 0,650318 |
| Q96K37  | Solute carrier family 35 member E1 OS=Homo sapiens OX=9606 GN=SLC35E1 PE=1 SV=2                                                  | -0,142561603 | 0,650117 |
| Q9HD33  | 39S ribosomal protein L47, mitochondrial OS=Homo sapiens OX=9606 GN=MRPL47 PE=1 SV=2                                             | -0,198638565 | 0,649273 |
| Q9H9A6  | Leucine-rich repeat-containing protein 40 OS=Homo sapiens OX=9606 GN=LRRCA40 PE=1 SV=1                                           | -0,117177548 | 0,648667 |
| P47895  | Aldehyde dehydrogenase family 1 member A3 OS=Homo sapiens OX=9606 GN=ALDH1A3 PE=1 SV=2                                           | -0,074971495 | 0,646928 |
| Q9H694  | Protein bicaudal C homolog 1 OS=Homo sapiens OX=9606 GN=BICC1 PE=1 SV=2                                                          | 0,282052021  | 0,646824 |
| P09110  | 3-ketoacyl-CoA thiolase, peroxisomal OS=Homo sapiens OX=9606 GN=ACAA1 PE=1 SV=2                                                  | -0,101739371 | 0,646645 |
| Q4KMP7  | TBC1 domain family member 10B OS=Homo sapiens OX=9606 GN=TBC1D10B PE=1 SV=3                                                      | -0,197515055 | 0,645245 |

|            |                                                                                                                               |              |          |
|------------|-------------------------------------------------------------------------------------------------------------------------------|--------------|----------|
| A0A084J2D5 | Glutamine amidotransferase-like class 1 domain-containing protein 3B, mitochondrial OS=Homo sapiens OX=9606 GN=GATD3B PE=1 SV | 0,108212226  | 0,646608 |
| P07437     | Tubulin beta chain OS=Homo sapiens OX=9606 GN=TUBB PE=1 SV=2                                                                  | 0,116456886  | 0,644085 |
| Q15165     | Serum paraoxonase/arylesterase 2 OS=Homo sapiens OX=9606 GN=PON2 PE=1 SV=4                                                    | 0,101186039  | 0,642586 |
| Q92609     | TBC1 domain family member 5 OS=Homo sapiens OX=9606 GN=TBC1D5 PE=1 SV=1                                                       | -0,097967913 | 0,64258  |
| Q9UN37     | Vacuolar protein sorting-associated protein 4A OS=Homo sapiens OX=9606 GN=VPS4A PE=1 SV=1                                     | 0,161417689  | 0,640503 |
| Q9BOE5     | Apolipoprotein L2 OS=Homo sapiens OX=9606 GN=APOL2 PE=1 SV=1                                                                  | -0,126459141 | 0,640413 |
| P49590     | Probable histidine-tRNA ligase, mitochondrial OS=Homo sapiens OX=9606 GN=HARS2 PE=1 SV=1                                      | 0,279247133  | 0,640338 |
| Q9Y5K8     | V-type proton ATPase subunit D OS=Homo sapiens OX=9606 GN=ATP6V1D PE=1 SV=1                                                   | -0,196062285 | 0,640041 |
| Q8NFY4     | Semaphorin-6D OS=Homo sapiens OX=9606 GN=SEMA6D PE=1 SV=1                                                                     | 0,29487823   | 0,63969  |
| P21796     | Voltage-dependent anion-selective channel protein 1 OS=Homo sapiens OX=9606 GN=VDAC1 PE=1 SV=2                                | -0,074242535 | 0,639623 |
| Q15003     | Condensin complex subunit 2 OS=Homo sapiens OX=9606 GN=NCAPH PE=1 SV=3                                                        | 0,140451791  | 0,639193 |
| Q9BVM2     | Protein DPCD OS=Homo sapiens OX=9606 GN=DPCD PE=1 SV=2                                                                        | 0,278563315  | 0,638755 |
| 075122     | CLIP-associating protein 2 OS=Homo sapiens OX=9606 GN=CLASP2 PE=1 SV=3                                                        | -0,27837568  | 0,638321 |
| Q6F181     | Anamorsin OS=Homo sapiens OX=9606 GN=CIAPIN1 PE=1 SV=2                                                                        | -0,115524118 | 0,638165 |
| P61158     | Actin-related protein 3 OS=Homo sapiens OX=9606 GN=ACTR3 PE=1 SV=3                                                            | 0,064345     | 0,638133 |
| Q9H4M9     | EH domain-containing protein 1 OS=Homo sapiens OX=9606 GN=EHD1 PE=1 SV=2                                                      | 0,061379364  | 0,637903 |
| Q14192     | Four and a half LIM domains protein 2 OS=Homo sapiens OX=9606 GN=FHL2 PE=1 SV=3                                               | 0,067734895  | 0,637836 |
| Q13325     | Interferon-induced protein with tetratricopeptide repeats 5 OS=Homo sapiens OX=9606 GN=IFIT5 PE=1 SV=1                        | -0,160671537 | 0,637178 |
| P63167     | Dynein light chain 1, cytoplasmic OS=Homo sapiens OX=9606 GN=DYNLL1 PE=1 SV=1                                                 | 0,277772632  | 0,636925 |
| Q96P48     | Arf-GAP with Rho-GAP domain, ANK repeat and PH domain-containing protein 1 OS=Homo sapiens OX=9606 GN=ARAP1 PE=1 SV=3         | -0,16059644  | 0,636843 |
| Q68C22     | Tensin-3 OS=Homo sapiens OX=9606 GN=TNS3 PE=1 SV=2                                                                            | -0,195094561 | 0,636576 |
| P13489     | Ribonuclease inhibitor OS=Homo sapiens OX=9606 GN=RNH1 PE=1 SV=2                                                              | 0,057481214  | 0,635939 |
| Q14828     | Secretory carrier-associated membrane protein 3 OS=Homo sapiens OX=9606 GN=SCAMP3 PE=1 SV=3                                   | 0,125655385  | 0,635762 |
| Q9Y224     | RNA transcription, translation and transport factor protein OS=Homo sapiens OX=9606 GN=RTRAF PE=1 SV=1                        | 0,085879594  | 0,635433 |
| P04181     | Ornithine aminotransferase, mitochondrial OS=Homo sapiens OX=9606 GN=OAT PE=1 SV=1                                            | -0,085815947 | 0,634887 |
| Q575P2     | Sickle tail protein homolog OS=Homo sapiens OX=9606 GN=KIAA1217 PE=1 SV=2                                                     | -0,194564669 | 0,63446  |
| Q9S2G1     | Ras-related protein Rab-34 OS=Homo sapiens OX=9606 GN=RAB34 PE=1 SV=1                                                         | 0,114939697  | 0,633462 |
| Q8N4A0     | Polypeptide N-acetylgalactosaminyltransferase 4 OS=Homo sapiens OX=9606 GN=GALNT4 PE=1 SV=2                                   | -0,276669823 | 0,634371 |
| Q72739     | YTH domain-containing family protein 3 OS=Homo sapiens OX=9606 GN=YTHDF3 PE=1 SV=1                                            | 0,106692416  | 0,634196 |
| Q86V87     | #N/D                                                                                                                          | 0,276337261  | 0,6336   |
| P68036     | Ubiquitin-conjugating enzyme E2 L3 OS=Homo sapiens OX=9606 GN=UBE2L3 PE=1 SV=1                                                | -0,106582175 | 0,633443 |
| P47914     | 60S ribosomal protein L29 OS=Homo sapiens OX=9606 GN=RPL29 PE=1 SV=2                                                          | 0,276207322  | 0,633299 |
| Q14579     | Coatomer subunit epsilon OS=Homo sapiens OX=9606 GN=COPE PE=1 SV=3                                                            | -0,085622221 | 0,632829 |
| Q9NPQ8     | Synergizer-A OS=Homo sapiens OX=9606 GN=RIC8A PE=1 SV=3                                                                       | 0,078927018  | 0,633182 |
| Q94854     | Uncharacterized protein KIAA0754 OS=Homo sapiens OX=9606 GN=KIAA0754 PE=2 SV=4                                                | -0,275352142 | 0,633117 |
| Q99832     | T-complex protein 1 subunit eta OS=Homo sapiens OX=9606 GN=CCT7 PE=1 SV=2                                                     | 0,048349772  | 0,630919 |
| P30086     | Phosphatidylethanolamine-binding protein 1 OS=Homo sapiens OX=9606 GN=PEBP1 PE=1 SV=3                                         | -0,085350929 | 0,630908 |
| P09486     | SPARC OS=Homo sapiens OX=9606 GN=SPARC PE=1 SV=1                                                                              | -0,085334437 | 0,630767 |
| P49354     | Protein farnesyltransferase/geranylgeranyltransferase type-1 subunit alpha OS=Homo sapiens OX=9606 GN=FNTA PE=1 SV=1          | -0,09400962  | 0,630382 |
| Q724H8     | Protein O-glucosyltransferase 3 OS=Homo sapiens OX=9606 GN=POGLUT3 PE=1 SV=2                                                  | -0,085255768 | 0,630094 |
| Q96RU3     | Formin-binding protein 1 OS=Homo sapiens OX=9606 GN=FNBP1 PE=1 SV=2                                                           | 0,274801551  | 0,630041 |
| Q15650     | Activating signal cointegrator 1 OS=Homo sapiens OX=9606 GN=TRIP4 PE=1 SV=4                                                   | 0,266506586  | 0,629819 |
| Q9H3F6     | BTB/POZ domain-containing adapter for CUL3-mediated RhoA degradation protein 3 OS=Homo sapiens OX=9606 GN=KCTD10 PE=1 SV=1    | -0,292863947 | 0,629754 |
| Q00461     | Golgi integral membrane protein 4 OS=Homo sapiens OX=9606 GN=GOLIM4 PE=1 SV=1                                                 | 0,073240287  | 0,629611 |
| Q7L1Q6     | Basic leucine zipper and W2 domain-containing protein 1 OS=Homo sapiens OX=9606 GN=BZW1 PE=1 SV=1                             | 0,066857711  | 0,628249 |
| P06753     | Tropomyosin alpha-3 chain OS=Homo sapiens OX=9606 GN=TPM3 PE=1 SV=2                                                           | -0,192686783 | 0,627963 |
| P28331     | NADH-ubiquinone oxidoreductase 75 kDa subunit, mitochondrial OS=Homo sapiens OX=9606 GN=NDUFS1 PE=1 SV=3                      | -0,078297454 | 0,627334 |
| Q9NQTS     | Exosome complex component RRP40 OS=Homo sapiens OX=9606 GN=EXOSC3 PE=1 SV=3                                                   | -0,273152318 | 0,626216 |
| O60264     | SWI/SNF-related matrix-associated actin-dependent regulator of chromatin subfamily A member 5 OS=Homo sapiens OX=9606 GN=SM/  | -0,137888627 | 0,625967 |
| Q8TD86     | E3 ubiquitin-protein ligase DTX3L OS=Homo sapiens OX=9606 GN=DTX3L PE=1 SV=1                                                  | -0,272957285 | 0,625764 |
| P47756     | F-actin-capping protein subunit beta OS=Homo sapiens OX=9606 GN=CAPZB PE=1 SV=4                                               | 0,070479553  | 0,624636 |
| P23229     | Integrin alpha-6 OS=Homo sapiens OX=9606 GN=ITGA6 PE=1 SV=5                                                                   | 0,191687723  | 0,624393 |
| Q8WVM8     | Sec1 family domain-containing protein 1 OS=Homo sapiens OX=9606 GN=SCFD1 PE=1 SV=4                                            | 0,064702911  | 0,623727 |
| Q2M389     | WASH complex subunit 4 OS=Homo sapiens OX=9606 GN=WASHC4 PE=1 SV=2                                                            | -0,084447703 | 0,623195 |
| Q9HAB8     | Phosphopantothenate-cysteine ligase OS=Homo sapiens OX=9606 GN=PPCS PE=1 SV=2                                                 | 0,137214482  | 0,622497 |
| Q8IWA5     | Choline transporter-like protein 2 OS=Homo sapiens OX=9606 GN=SLC4A2 PE=1 SV=3                                                | -0,157272885 | 0,622066 |
| P19404     | NADH dehydrogenase [ubiquinone] flavoprotein 2, mitochondrial OS=Homo sapiens OX=9606 GN=NDUFV2 PE=1 SV=2                     | -0,271043533 | 0,621322 |
| P13807     | Glycogen [starch] synthase, muscle OS=Homo sapiens OX=9606 GN=GYS1 PE=1 SV=2                                                  | 0,12300637   | 0,620483 |
| P55769     | NHP2-like protein 1 OS=Homo sapiens OX=9606 GN=SNU13 PE=1 SV=3                                                                | -0,190532888 | 0,620268 |
| P06703     | Protein S100-A6 OS=Homo sapiens OX=9606 GN=S100A6 PE=1 SV=1                                                                   | 0,088064305  | 0,620079 |
| 075533     | Splicing factor 3B subunit 1 OS=Homo sapiens OX=9606 GN=SF3B1 PE=1 SV=3                                                       | -0,049766543 | 0,619688 |
| P06737     | Glycogen phosphorylase, liver form OS=Homo sapiens OX=9606 GN=PYGL PE=1 SV=4                                                  | -0,072229522 | 0,619553 |
| 075718     | Cartilage-associated protein OS=Homo sapiens OX=9606 GN=CRTAP PE=1 SV=1                                                       | -0,067917676 | 0,619351 |
| Q9UBV2     | Protein sel-1 homolog 1 OS=Homo sapiens OX=9606 GN=SELL1 PE=1 SV=3                                                            | -0,136516235 | 0,618906 |
| P62834     | Ras-related protein Rap-1A OS=Homo sapiens OX=9606 GN=RAP1A PE=1 SV=1                                                         | 0,036206854  | 0,618898 |
| Q9UI10     | Translation initiation factor eIF-2B subunit delta OS=Homo sapiens OX=9606 GN=EIF2B4 PE=1 SV=2                                | 0,190079421  | 0,618649 |
| Q9Y6A4     | Cilia- and flagella-associated protein 20 OS=Homo sapiens OX=9606 GN=CFAP20 PE=1 SV=1                                         | -0,150654915 | 0,618266 |
| Q9NRG7     | Epimerase family protein SDR39U1 OS=Homo sapiens OX=9606 GN=SDR39U1 PE=1 SV=3                                                 | -0,269703045 | 0,618209 |
| 075494     | Serine/arginine-rich splicing factor 10 OS=Homo sapiens OX=9606 GN=SRSF10 PE=1 SV=1                                           | 0,156274574  | 0,617638 |
| P56545     | C-terminal-binding protein 2 OS=Homo sapiens OX=9606 GN=CTBP2 PE=1 SV=1                                                       | -0,1224993   | 0,617566 |
| O60664     | Perilipin-3 OS=Homo sapiens OX=9606 GN=PLIN3 PE=1 SV=3                                                                        | -0,056013614 | 0,617102 |
| Q9P2T1     | GMP reductase 2 OS=Homo sapiens OX=9606 GN=GMPR2 PE=1 SV=1                                                                    | -0,112158012 | 0,616897 |
| Q9NQS3     | Nectin-3 OS=Homo sapiens OX=9606 GN=NECTIN3 PE=1 SV=1                                                                         | -0,269117332 | 0,616848 |
| Q14019     | Coactosin-like protein OS=Homo sapiens OX=9606 GN=COTL1 PE=1 SV=3                                                             | -0,097514402 | 0,615798 |
| Q92990     | Giomulin OS=Homo sapiens OX=9606 GN=GLMN PE=1 SV=2                                                                            | -0,189260317 | 0,615725 |
| P45984     | Mitogen-activated protein kinase 9 OS=Homo sapiens OX=9606 GN=MAPK9 PE=1 SV=2                                                 | -0,189198281 | 0,615504 |
| P20073     | Annexin A7 OS=Homo sapiens OX=9606 GN=ANXA7 PE=1 SV=3                                                                         | 0,065625071  | 0,614836 |
| Q9BUF5     | Tubulin beta-6 chain OS=Homo sapiens OX=9606 GN=TUBB6 PE=1 SV=1                                                               | -0,087353355 | 0,614309 |
| P49458     | Signal recognition particle 9 kDa protein OS=Homo sapiens OX=9606 GN=SRP9 PE=1 SV=2                                           | 0,135507089  | 0,613724 |
| P58546     | Myotrophin OS=Homo sapiens OX=9606 GN=MTPN PE=1 SV=2                                                                          | 0,111547737  | 0,613057 |
| Q62S30     | Neurobeachin-like protein 1 OS=Homo sapiens OX=9606 GN=NBEAL1 PE=2 SV=3                                                       | -0,118049741 | 0,612761 |
| P22694     | cAMP-dependent protein kinase catalytic subunit beta OS=Homo sapiens OX=9606 GN=PRKACB PE=1 SV=2                              | 0,188256538  | 0,612145 |
| Q13496     | Myotubularin OS=Homo sapiens OX=9606 GN=MTM1 PE=1 SV=2                                                                        | -0,170991729 | 0,611504 |
| Q9Y5S9     | RNA-binding protein 8A OS=Homo sapiens OX=9606 GN=RBM8A PE=1 SV=1                                                             | 0,135034275  | 0,611298 |
| Q9UHY1     | Nuclear receptor-binding protein OS=Homo sapiens OX=9606 GN=NRBP1 PE=1 SV=1                                                   | -0,103253621 | 0,610774 |
| Q9BUP0     | EF-hand domain-containing protein D1 OS=Homo sapiens OX=9606 GN=EFHD1 PE=1 SV=1                                               | 0,134928457  | 0,610756 |
| Q99961     | Endophilin-A2 OS=Homo sapiens OX=9606 GN=SH3GL1 PE=1 SV=1                                                                     | -0,079513806 | 0,610459 |
| Q9Y310     | tRNA-splicing ligase RtcB homolog OS=Homo sapiens OX=9606 GN=RTCB PE=1 SV=1                                                   | 0,065195603  | 0,610179 |
| 000300     | Tumor necrosis factor receptor superfamily member 11B OS=Homo sapiens OX=9606 GN=TNFRSF11B PE=1 SV=3                          | -0,264825292 | 0,608686 |
| Q15386     | Ubiquitin-protein ligase E3C OS=Homo sapiens OX=9606 GN=UBE3C PE=1 SV=3                                                       | 0,110416233  | 0,605951 |
| P82675     | 28S ribosomal protein S5, mitochondrial OS=Homo sapiens OX=9606 GN=MRPS5 PE=1 SV=2                                            | 0,264423916  | 0,605931 |
| Q9BRU7     | Tudor-interacting repair regulator protein OS=Homo sapiens OX=9606 GN=NUDT16L1 PE=1 SV=1                                      | -0,263885175 | 0,604627 |
| P41236     | Protein phosphatase inhibitor 2 OS=Homo sapiens OX=9606 GN=PPP1R2 PE=1 SV=2                                                   | -0,325866541 | 0,604277 |
| P53597     | Succinate-CoA ligase [ADP/GDP-forming] subunit alpha, mitochondrial OS=Homo sapiens OX=9606 GN=SUCLG1 PE=1 SV=4               | -0,110053684 | 0,603678 |
| Q9Y625     | Glypican-6 OS=Homo sapiens OX=9606 GN=GPGC PE=1 SV=1                                                                          | 0,26334344   | 0,603416 |
| 043148     | mRNA cap guanine-N7 methyltransferase OS=Homo sapiens OX=9606 GN=RNMT PE=1 SV=1                                               | -0,263042199 | 0,602714 |
| Q9Y5P4     | Collagen type IV alpha-3-binding protein OS=Homo sapiens OX=9606 GN=COL4A3BP PE=1 SV=1                                        | -0,109867086 | 0,602509 |
| Q96GC9     | Vacuole membrane protein 1 OS=Homo sapiens OX=9606 GN=VMP1 PE=1 SV=1                                                          | -0,262678885 | 0,601868 |

|        |                                                                                                                   |              |          |
|--------|-------------------------------------------------------------------------------------------------------------------|--------------|----------|
| Q9BT23 | LIM domain-containing protein 2 OS=Homo sapiens OX=9606 GN=LIMD2 PE=1 SV=1                                        | -0,132904406 | 0,600967 |
| Q13459 | Unconventional myosin-Ixb OS=Homo sapiens OX=9606 GN=MYO9B PE=1 SV=3                                              | -0,070341425 | 0,600866 |
| Q9BW27 | Nuclear pore complex protein Nup85 OS=Homo sapiens OX=9606 GN=NUP85 PE=1 SV=1                                     | -0,109560007 | 0,600585 |
| Q8NE24 | Histone-lysine N-methyltransferase 2C OS=Homo sapiens OX=9606 GN=KMT2C PE=1 SV=3                                  | 0,262101884  | 0,600524 |
| Q7Z3C6 | Autophagy-related protein 9A OS=Homo sapiens OX=9606 GN=ATG9A PE=1 SV=3                                           | -0,262075569 | 0,600462 |
| Q9Y2Q9 | 28S ribosomal protein S28, mitochondrial OS=Homo sapiens OX=9606 GN=MRPS28 PE=1 SV=1                              | 0,26192553   | 0,600113 |
| Q5QJ66 | Deoxyribonucleotidyltransferase terminal-interacting protein 2 OS=Homo sapiens OX=9606 GN=DNTTIP2 PE=1 SV=2       | 0,313871865  | 0,600007 |
| P62316 | Small nuclear ribonucleoprotein Sm D2 OS=Homo sapiens OX=9606 GN=SNRPD2 PE=1 SV=1                                 | -0,09531076  | 0,599841 |
| Q9UJU6 | Drebrin-like protein OS=Homo sapiens OX=9606 GN=DBNL PE=1 SV=1                                                    | -0,072637212 | 0,599768 |
| Q9NQ22 | Something about silencing protein 10 OS=Homo sapiens OX=9606 GN=UTP3 PE=1 SV=1                                    | 0,261736868  | 0,599673 |
| P55036 | 26S proteasome non-ATPase regulatory subunit 4 OS=Homo sapiens OX=9606 GN=PSMD4 PE=1 SV=1                         | 0,095263648  | 0,599501 |
| Q5T9L3 | Protein wntless homolog OS=Homo sapiens OX=9606 GN=WLS PE=1 SV=2                                                  | 0,261647272  | 0,599464 |
| Q96QU8 | Exportin-6 OS=Homo sapiens OX=9606 GN=XPO6 PE=1 SV=1                                                              | -0,320141129 | 0,599164 |
| Q9BX55 | AP-1 complex subunit mu-1 OS=Homo sapiens OX=9606 GN=AP1M1 PE=1 SV=3                                              | 0,078186432  | 0,598722 |
| O14618 | Copper chaperone for superoxide dismutase OS=Homo sapiens OX=9606 GN=CCS PE=1 SV=1                                | -0,26114587  | 0,598296 |
| Q02241 | Kinesin-like protein KIF23 OS=Homo sapiens OX=9606 GN=KIF23 PE=1 SV=3                                             | 0,261035072  | 0,598073 |
| P07858 | Cathepsin B OS=Homo sapiens OX=9606 GN=CTSB PE=1 SV=3                                                             | 0,094866587  | 0,596636 |
| Q9H2M9 | Rab3 GTPase-activating protein non-catalytic subunit OS=Homo sapiens OX=9606 GN=RAB3GAP2 PE=1 SV=1                | 0,074927173  | 0,596245 |
| Q9H792 | Inactive tyrosine-protein kinase PEAK1 OS=Homo sapiens OX=9606 GN=PEAK1 PE=1 SV=4                                 | 0,118633492  | 0,595421 |
| P55081 | Microfibrillar-associated protein 1 OS=Homo sapiens OX=9606 GN=MFAP1 PE=1 SV=2                                    | 0,183533764  | 0,595326 |
| Q96KA5 | Cleft lip and palate transmembrane protein 1-like protein OS=Homo sapiens OX=9606 GN=CLPTM1L PE=1 SV=1            | -0,151070353 | 0,594633 |
| Q9BXW7 | Haloacid dehalogenase-like hydrolase domain-containing 5 OS=Homo sapiens OX=9606 GN=HDHD5 PE=1 SV=1               | 0,171959739  | 0,593448 |
| Q9ULR0 | Pre-mRNA-splicing factor ISY1 homolog OS=Homo sapiens OX=9606 GN=ISY1 PE=1 SV=3                                   | 0,258920263  | 0,593106 |
| Q9UMY4 | Sorting nexin-12 OS=Homo sapiens OX=9606 GN=SNX12 PE=1 SV=3                                                       | -0,118226381 | 0,593099 |
| Q8N3F8 | MICAL-like protein 1 OS=Homo sapiens OX=9606 GN=MICAL1 PE=1 SV=2                                                  | -0,258892593 | 0,593042 |
| P15291 | Beta-1,4-galactosyltransferase 1 OS=Homo sapiens OX=9606 GN=B4GALT1 PE=1 SV=5                                     | -0,108324362 | 0,592859 |
| Q8N9T8 | Protein KR11 homolog OS=Homo sapiens OX=9606 GN=KR11 PE=1 SV=3                                                    | 0,258647734  | 0,59247  |
| O43149 | Zinc finger ZZ-type and EF-hand domain-containing protein 1 OS=Homo sapiens OX=9606 GN=ZZEF1 PE=1 SV=6            | -0,258430819 | 0,591964 |
| Q99575 | Ribonucleases P/MRP protein subunit POP1 OS=Homo sapiens OX=9606 GN=POP1 PE=1 SV=2                                | -0,258378635 | 0,591843 |
| Q9N2I7 | Upstream-binding protein 1 OS=Homo sapiens OX=9606 GN=UBP1 PE=1 SV=1                                              | -0,257457334 | 0,589693 |
| P06733 | Alpha-enolase OS=Homo sapiens OX=9606 GN=ENO1 PE=1 SV=2                                                           | -0,057349789 | 0,589609 |
| Q6WCQ1 | Myosin phosphatase Rho-interacting protein OS=Homo sapiens OX=9606 GN=MPRIP PE=1 SV=3                             | 0,05000905   | 0,589037 |
| Q13418 | Integrin-linked protein kinase OS=Homo sapiens OX=9606 GN=ILK PE=1 SV=2                                           | 0,057270998  | 0,588673 |
| O95486 | Protein transport protein Sec24A OS=Homo sapiens OX=9606 GN=SEC24A PE=1 SV=2                                      | -0,071251944 | 0,588605 |
| P41223 | Protein BUD31 homolog OS=Homo sapiens OX=9606 GN=BUD31 PE=1 SV=2                                                  | 0,181074341  | 0,586586 |
| O95747 | Serine/threonine-protein kinase OSR1 OS=Homo sapiens OX=9606 GN=OSR1 PE=1 SV=1                                    | -0,068787002 | 0,585583 |
| Q13485 | Mothers against decapentaplegic homolog 4 OS=Homo sapiens OX=9606 GN=SMAD4 PE=1 SV=1                              | -0,1299755   | 0,585457 |
| Q00610 | Clathrin heavy chain 1 OS=Homo sapiens OX=9606 GN=CLTC PE=1 SV=5                                                  | -0,02790531  | 0,585452 |
| O95628 | CCR4-NOT transcription complex subunit 4 OS=Homo sapiens OX=9606 GN=CNOT4 PE=1 SV=3                               | 0,21554237   | 0,584858 |
| Q8XO1  | SURP and G-patch domain-containing protein 2 OS=Homo sapiens OX=9606 GN=SUGP2 PE=1 SV=2                           | 0,255091038  | 0,584168 |
| Q96J84 | Kin of IRRE-like protein 1 OS=Homo sapiens OX=9606 GN=KIRREL1 PE=1 SV=2                                           | 0,129523967  | 0,58316  |
| Q63HR2 | Tensin-2 OS=Homo sapiens OX=9606 GN=TNS2 PE=1 SV=2                                                                | -0,254640648 | 0,583116 |
| Q15427 | Splicing factor 3B subunit 4 OS=Homo sapiens OX=9606 GN=SF3B4 PE=1 SV=1                                           | 0,129483585  | 0,582955 |
| O14817 | Tetraspanin-4 OS=Homo sapiens OX=9606 GN=TSPAN4 PE=1 SV=1                                                         | 0,254417827  | 0,582595 |
| Q96A72 | Protein mago nashi homolog 2 OS=Homo sapiens OX=9606 GN=MAGOHB PE=1 SV=1                                          | -0,083978832 | 0,581628 |
| P26293 | Growth factor receptor-bound protein 2 OS=Homo sapiens OX=9606 GN=GRB2 PE=1 SV=1                                  | 0,087631472  | 0,581457 |
| Q8T6B3 | Alpha-protein kinase 2 OS=Homo sapiens OX=9606 GN=ALPK2 PE=2 SV=3                                                 | -0,179305676 | 0,580309 |
| O15042 | U2 snRNP-associated SURP motif-containing protein OS=Homo sapiens OX=9606 GN=U2SURP PE=1 SV=2                     | 0,147777511  | 0,580147 |
| Q8WWM9 | Cytoglobin OS=Homo sapiens OX=9606 GN=CYGB PE=1 SV=1                                                              | -0,147435428 | 0,578646 |
| O43242 | 26S proteasome non-ATPase regulatory subunit 3 OS=Homo sapiens OX=9606 GN=PSMD3 PE=1 SV=2                         | -0,057725896 | 0,578604 |
| P47224 | Guanine nucleotide exchange factor MSS4 OS=Homo sapiens OX=9606 GN=RABIF PE=1 SV=2                                | -0,252166604 | 0,577334 |
| P78330 | Phosphoserine phosphatase OS=Homo sapiens OX=9606 GN=PSPH PE=1 SV=2                                               | -0,105786363 | 0,577053 |
| Q12899 | Tripartite motif-containing protein 26 OS=Homo sapiens OX=9606 GN=TRIM26 PE=1 SV=1                                | -0,251846866 | 0,576586 |
| Q14699 | Raftlin OS=Homo sapiens OX=9606 GN=RFTN1 PE=1 SV=4                                                                | 0,067778764  | 0,575718 |
| Q13561 | Dynactin subunit 2 OS=Homo sapiens OX=9606 GN=DCTN2 PE=1 SV=4                                                     | 0,06028794   | 0,574807 |
| Q659C4 | La-related protein 1B OS=Homo sapiens OX=9606 GN=LARP1B PE=1 SV=2                                                 | -0,031401553 | 0,572421 |
| Q96AQ6 | Pre-B-cell leukemia transcription factor-interacting protein 1 OS=Homo sapiens OX=9606 GN=PBXIP1 PE=1 SV=1        | 0,176682813  | 0,571013 |
| Q08380 | Galectin-3-binding protein OS=Homo sapiens OX=9606 GN=LGALS3BP PE=1 SV=1                                          | -0,145640221 | 0,570775 |
| Q8IZL8 | Proline-, glutamic acid- and leucine-rich protein 1 OS=Homo sapiens OX=9606 GN=PRLP1 PE=1 SV=2                    | 0,145436036  | 0,569881 |
| Q8IZP0 | Abi interactor 1 OS=Homo sapiens OX=9606 GN=ABI1 PE=1 SV=4                                                        | -0,104591093 | 0,569639 |
| P16989 | Y-box-binding protein 3 OS=Homo sapiens OX=9606 GN=YBX3 PE=1 SV=4                                                 | 0,091078583  | 0,569452 |
| P38117 | Electron transfer flavoprotein subunit beta OS=Homo sapiens OX=9606 GN=ETFBF PE=1 SV=3                            | 0,081772381  | 0,569439 |
| Q8WWH5 | Probable tRNA pseudouridine synthase 1 OS=Homo sapiens OX=9606 GN=TRUB1 PE=1 SV=1                                 | -0,248455092 | 0,568651 |
| Q9UI26 | Importin-11 OS=Homo sapiens OX=9606 GN=IPO11 PE=1 SV=1                                                            | -0,175891557 | 0,568211 |
| Q9BUK6 | Protein misato homolog 1 OS=Homo sapiens OX=9606 GN=MSTO1 PE=1 SV=1                                               | -0,175875767 | 0,568155 |
| Q76031 | ATP-dependent Clp protease ATP-binding subunit clpX-like, mitochondrial OS=Homo sapiens OX=9606 GN=CLPX PE=1 SV=2 | 0,14500203   | 0,567981 |
| Q5W0V3 | Protein FAM160B1 OS=Homo sapiens OX=9606 GN=FAM160B1 PE=1 SV=1                                                    | 0,069256454  | 0,567762 |
| Q9Y3Z3 | Deoxynucleoside triphosphate triphosphohydrolase SAMHD1 OS=Homo sapiens OX=9606 GN=SAMHD1 PE=1 SV=2               | -0,175722414 | 0,567613 |
| Q02978 | Mitochondrial 2-oxoglutarate/malate carrier protein OS=Homo sapiens OX=9606 GN=SLC25A11 PE=1 SV=3                 | 0,081518271  | 0,567414 |
| P49327 | Fatty acid synthase OS=Homo sapiens OX=9606 GN=FASN PE=1 SV=3                                                     | -0,027753602 | 0,567244 |
| O14545 | TRAF-type zinc finger domain-containing protein 1 OS=Homo sapiens OX=9606 GN=TRAFD1 PE=1 SV=1                     | -0,144763235 | 0,566936 |
| P09429 | High mobility group protein B1 OS=Homo sapiens OX=9606 GN=HMGB1 PE=1 SV=3                                         | 0,090522183  | 0,565942 |
| Q86VN1 | Vacuolar protein-sorting-associated protein 36 OS=Homo sapiens OX=9606 GN=VPS36 PE=1 SV=1                         | 0,458442197  | 0,565324 |
| Q9UN70 | Protocadherin gamma-C3 OS=Homo sapiens OX=9606 GN=PCDHGC3 PE=1 SV=1                                               | -0,144083896 | 0,565282 |
| Q96TC7 | Regulator of microtubule dynamics protein 3 OS=Homo sapiens OX=9606 GN=RMDN3 PE=1 SV=2                            | -0,125765485 | 0,564106 |
| Q7L5D6 | Golgi to ER traffic protein 4 homolog OS=Homo sapiens OX=9606 GN=GET4 PE=1 SV=1                                   | 0,246457439  | 0,563974 |
| P06493 | Cyclin-dependent kinase 1 OS=Homo sapiens OX=9606 GN=CDK1 PE=1 SV=3                                               | 0,143984521  | 0,563531 |
| Q15021 | Condensin complex subunit 1 OS=Homo sapiens OX=9606 GN=NCAPD2 PE=1 SV=3                                           | 0,096190993  | 0,563265 |
| P20042 | Eukaryotic translation initiation factor 2 subunit 2 OS=Homo sapiens OX=9606 GN=EIF2S2 PE=1 SV=2                  | 0,056326463  | 0,562493 |
| P52948 | Nuclear pore complex protein Nup98-Nup96 OS=Homo sapiens OX=9606 GN=NUP98 PE=1 SV=4                               | -0,112788636 | 0,562242 |
| Q96PU8 | Protein quaking OS=Homo sapiens OX=9606 GN=QKI PE=1 SV=1                                                          | -0,143644052 | 0,562043 |
| Q75340 | Programmed cell death protein 6 OS=Homo sapiens OX=9606 GN=PDCC6 PE=1 SV=1                                        | 0,103294775  | 0,561662 |
| Q14671 | Pumilio homolog 1 OS=Homo sapiens OX=9606 GN=PUM1 PE=1 SV=3                                                       | -0,143527624 | 0,561534 |
| O14561 | Acyl carrier protein, mitochondrial OS=Homo sapiens OX=9606 GN=NDUFAB1 PE=1 SV=3                                  | 0,173961111  | 0,561383 |
| Q9Y6W5 | Wiskott-Aldrich syndrome protein family member 2 OS=Homo sapiens OX=9606 GN=WASF2 PE=1 SV=3                       | -0,125210086 | 0,5613   |
| Q13563 | Polycystin-2 OS=Homo sapiens OX=9606 GN=PKD2 PE=1 SV=3                                                            | -0,245257316 | 0,561163 |
| Q9ULF5 | Zinc transporter ZIP10 OS=Homo sapiens OX=9606 GN=SLC39A10 PE=1 SV=2                                              | -0,17373922  | 0,560598 |
| Q96AC1 | Fermitin family homolog 2 OS=Homo sapiens OX=9606 GN=FERMT2 PE=1 SV=1                                             | -0,044932141 | 0,560393 |
| P01344 | Insulin-like growth factor II OS=Homo sapiens OX=9606 GN=IGF2 PE=1 SV=1                                           | -0,244806063 | 0,560233 |
| Q15044 | SLIT-ROBO Rho GTPase-activating protein 2 OS=Homo sapiens OX=9606 GN=SRGAP2 PE=1 SV=3                             | -0,244639383 | 0,559715 |
| Q9UMS4 | Pre-mRNA-processing factor 19 OS=Homo sapiens OX=9606 GN=PRPF19 PE=1 SV=1                                         | -0,076866804 | 0,55932  |
| P49588 | Alanine-tRNA ligase, cytoplasmic OS=Homo sapiens OX=9606 GN=AAARS PE=1 SV=2                                       | -0,044850542 | 0,559223 |
| Q99590 | Protein SCAF11 OS=Homo sapiens OX=9606 GN=SCAF11 PE=1 SV=2                                                        | 0,243789793  | 0,557724 |
| P21964 | Catechol O-methyltransferase OS=Homo sapiens OX=9606 GN=COMT PE=1 SV=2                                            | -0,068178443 | 0,557641 |
| Q9H6B4 | CXADR-like membrane protein OS=Homo sapiens OX=9606 GN=CLMP PE=1 SV=1                                             | 0,124068623  | 0,555541 |
| Q99470 | Stromal cell-derived factor 2 OS=Homo sapiens OX=9606 GN=SDF2 PE=1 SV=2                                           | 0,24265832   | 0,555071 |
| Q9BTT0 | Acidic leucine-rich nuclear phosphoprotein 32 family member E OS=Homo sapiens OX=9606 GN=ANP32E PE=1 SV=1         | -0,242457132 | 0,554599 |
| Q96MWS | Conserved oligomeric Golgi complex subunit 8 OS=Homo sapiens OX=9606 GN=COG8 PE=1 SV=2                            | 0,171976988  | 0,554373 |

|        |                                                                                                                         |              |          |
|--------|-------------------------------------------------------------------------------------------------------------------------|--------------|----------|
| P11117 | Lysosomal acid phosphatase OS=Homo sapiens OX=9606 GN=ACP2 PE=1 SV=3                                                    | -0,10207602  | 0,554102 |
| O43592 | Exportin-T OS=Homo sapiens OX=9606 GN=XPT PE=1 SV=2                                                                     | 0,055586962  | 0,554022 |
| Q99755 | Phosphatidylinositol 4-phosphate 5-kinase type-1 alpha OS=Homo sapiens OX=9606 GN=PIPSK1A PE=1 SV=1                     | -0,171854896 | 0,553942 |
| Q93556 | Protein farnesyltransferase subunit beta OS=Homo sapiens OX=9606 GN=FNTB PE=1 SV=1                                      | 0,242101137  | 0,553764 |
| Q9Y3Y2 | Chromatin target of PRMT1 protein OS=Homo sapiens OX=9606 GN=CHTOP PE=1 SV=2                                            | 0,241895548  | 0,553282 |
| P46063 | ATP-dependent DNA helicase Q1 OS=Homo sapiens OX=9606 GN=RECQL PE=1 SV=3                                                | -0,054267344 | 0,553282 |
| Q9NYU2 | UDP-glucose:glycoprotein glucosyltransferase 1 OS=Homo sapiens OX=9606 GN=UGGT1 PE=1 SV=3                               | 0,0414186    | 0,552935 |
| O95379 | Tumor necrosis factor alpha-induced protein 8 OS=Homo sapiens OX=9606 GN=TNFAIP8 PE=1 SV=1                              | -0,141507007 | 0,552718 |
| Q96G28 | Cilia- and flagella-associated protein 36 OS=Homo sapiens OX=9606 GN=CFAP36 PE=1 SV=2                                   | 0,241601494  | 0,552593 |
| Q8X1X2 | Mitochondrial Rho GTPase 1 OS=Homo sapiens OX=9606 GN=RHOT1 PE=1 SV=2                                                   | -0,241503696 | 0,552363 |
| Q14353 | Guanidinoacetate N-methyltransferase OS=Homo sapiens OX=9606 GN=GAMT PE=1 SV=1                                          | -0,240250157 | 0,549423 |
| Q96J96 | Mannose-1-phosphate guanyltransferase alpha OS=Homo sapiens OX=9606 GN=GMPPA PE=1 SV=1                                  | 0,079236236  | 0,549299 |
| Q96GG9 | DCN1-like protein 1 OS=Homo sapiens OX=9606 GN=DCUN1D1 PE=1 SV=1                                                        | -0,110172313 | 0,54751  |
| P09211 | Glutathione S-transferase P OS=Homo sapiens OX=9606 GN=GSTP1 PE=1 SV=2                                                  | 0,067010572  | 0,546721 |
| P48444 | Coatomer subunit delta OS=Homo sapiens OX=9606 GN=ARCN1 PE=1 SV=1                                                       | 0,050391164  | 0,546216 |
| P60900 | Proteasome subunit alpha type-6 OS=Homo sapiens OX=9606 GN=PSMA6 PE=1 SV=1                                              | -0,075217337 | 0,545627 |
| P30711 | Glutathione S-transferase theta-1 OS=Homo sapiens OX=9606 GN=GSTT1 PE=1 SV=4                                            | -0,238575614 | 0,545493 |
| Q9NUL3 | Double-stranded RNA-binding protein Staufen homolog 2 OS=Homo sapiens OX=9606 GN=STAU2 PE=1 SV=2                        | -0,238545173 | 0,545421 |
| O00743 | Serine/threonine-protein phosphatase 6 catalytic subunit OS=Homo sapiens OX=9606 GN=PPP6C PE=1 SV=1                     | -0,078625383 | 0,544471 |
| Q9NRX4 | 14 kDa phosphohistidine phosphatase OS=Homo sapiens OX=9606 GN=PHPT1 PE=1 SV=1                                          | -0,121846189 | 0,544358 |
| O00154 | Cytosolic acyl coenzyme A thioester hydrolase OS=Homo sapiens OX=9606 GN=ACOT7 PE=1 SV=3                                | -0,082643511 | 0,543806 |
| Q9HB11 | Beta-parvin OS=Homo sapiens OX=9606 GN=PARVB PE=1 SV=1                                                                  | -0,168927735 | 0,54362  |
| Q13107 | Ubiquitin carboxyl-terminal hydrolase 4 OS=Homo sapiens OX=9606 GN=USP4 PE=1 SV=3                                       | -0,121592077 | 0,543082 |
| Q42285 | Exosome RNA helicase MTR4 OS=Homo sapiens OX=9606 GN=MTREX PE=1 SV=3                                                    | 0,092937714  | 0,541652 |
| Q8WIJ2 | GRIP and coiled-coil domain-containing protein 2 OS=Homo sapiens OX=9606 GN=GCCC2 PE=1 SV=4                             | 0,138812571  | 0,540955 |
| O75084 | Frizzedl-7 OS=Homo sapiens OX=9606 GN=FZD7 PE=1 SV=2                                                                    | 0,236634607  | 0,540935 |
| P01112 | GTPase HRas OS=Homo sapiens OX=9606 GN=HRAS PE=1 SV=1                                                                   | -0,236315051 | 0,540185 |
| Q9UJ41 | Rab5 GDP/GTP exchange factor OS=Homo sapiens OX=9606 GN=RABGEF1 PE=1 SV=3                                               | -0,108851431 | 0,540101 |
| Q13200 | 26S proteasome non-ATPase regulatory subunit 2 OS=Homo sapiens OX=9606 GN=PSMD2 PE=1 SV=3                               | -0,039522075 | 0,539468 |
| Q14677 | Clathrin interactor 1 OS=Homo sapiens OX=9606 GN=CLINT1 PE=1 SV=1                                                       | 0,071379803  | 0,539358 |
| Q8IX05 | CD302 antigen OS=Homo sapiens OX=9606 GN=CD302 PE=1 SV=1                                                                | 0,141113684  | 0,538667 |
| P05387 | 60S acidic ribosomal protein P2 OS=Homo sapiens OX=9606 GN=RPLP2 PE=1 SV=1                                              | -0,108555689 | 0,538444 |
| Q00535 | Cyclin-dependent-like kinase 5 OS=Homo sapiens OX=9606 GN=CDK5 PE=1 SV=3                                                | 0,120562692  | 0,537918 |
| O94888 | UBX domain-containing protein 7 OS=Homo sapiens OX=9606 GN=UBXN7 PE=1 SV=2                                              | 0,235008743  | 0,537116 |
| Q15678 | Threonine-protein phosphatase non-receptor type 14 OS=Homo sapiens OX=9606 GN=PTPN14 PE=1 SV=2                          | 0,167778797  | 0,536055 |
| P18615 | Negative elongation factor E OS=Homo sapiens OX=9606 GN=NELFE PE=1 SV=3                                                 | -0,166750639 | 0,535955 |
| Q9NZD8 | Maspardin OS=Homo sapiens OX=9606 GN=SPG21 PE=1 SV=1                                                                    | 0,293037668  | 0,535334 |
| Q15397 | Pumilio homolog 3 OS=Homo sapiens OX=9606 GN=PUM3 PE=1 SV=3                                                             | 0,233786492  | 0,534244 |
| Q9Y3F4 | Serine-threonine kinase receptor-associated protein OS=Homo sapiens OX=9606 GN=STRAP PE=1 SV=1                          | 0,061479569  | 0,533786 |
| P54725 | UV excision repair protein RAD23 homolog A OS=Homo sapiens OX=9606 GN=RAD23A PE=1 SV=1                                  | -0,098718135 | 0,533492 |
| Q9NS86 | LanC-like protein 2 OS=Homo sapiens OX=9606 GN=LANCL2 PE=1 SV=1                                                         | -0,107658084 | 0,533423 |
| Q9H6T3 | RNA polymerase II-associated protein 3 OS=Homo sapiens OX=9606 GN=RPAP3 PE=1 SV=2                                       | 0,233157069  | 0,532765 |
| Q71775 | EPM2A-interacting protein 1 OS=Homo sapiens OX=9606 GN=EPM2AIP1 PE=1 SV=1                                               | 0,211249033  | 0,53154  |
| P67870 | Casein kinase II subunit beta OS=Homo sapiens OX=9606 GN=CSNK2B PE=1 SV=1                                               | -0,107052141 | 0,530038 |
| Q9P266 | Junctinal protein associated with coronary artery disease OS=Homo sapiens OX=9606 GN=JCAD PE=1 SV=3                     | 0,231962273  | 0,529956 |
| Q9UG01 | Intraflagellar transport protein 172 homolog OS=Homo sapiens OX=9606 GN=IFT172 PE=1 SV=2                                | 0,231655094  | 0,529234 |
| Q96I18 | Leucine-rich repeat and calponin homology domain-containing protein 3 OS=Homo sapiens OX=9606 GN=LRCH3 PE=1 SV=2        | -0,231166202 | 0,528084 |
| O96008 | Mitochondrial import receptor TOM40 homolog OS=Homo sapiens OX=9606 GN=TOMM40 PE=1 SV=1                                 | -0,106631652 | 0,527692 |
| Q5EB52 | Mesoderm-specific transcript homolog protein OS=Homo sapiens OX=9606 GN=MEST PE=2 SV=2                                  | 0,118501682  | 0,527604 |
| O00178 | GTP-binding protein 1 OS=Homo sapiens OX=9606 GN=GTPBP1 PE=1 SV=3                                                       | -0,164229179 | 0,527094 |
| P60468 | Protein transport protein Sec61 subunit beta OS=Homo sapiens OX=9606 GN=SEC61B PE=1 SV=2                                | 0,135485238  | 0,526572 |
| Q9Y230 | RuvB-like 2 OS=Homo sapiens OX=9606 GN=RUVBL2 PE=1 SV=3                                                                 | 0,058957893  | 0,526386 |
| Q9H492 | Microtubule-associated proteins 1A/1B light chain 3A OS=Homo sapiens OX=9606 GN=MAP1LC3A PE=1 SV=2                      | -0,163961088 | 0,526152 |
| Q9NRN7 | L-aminoadipate-semialdehyde dehydrogenase-phosphopantetheinyl transferase OS=Homo sapiens OX=9606 GN=AASDHPPT PE=1 SV=2 | -0,230248243 | 0,525925 |
| P0DN79 | Cystathionine beta-synthase-like protein OS=Homo sapiens OX=9606 GN=CBSL PE=1 SV=1                                      | 0,090405828  | 0,524952 |
| P56385 | ATP synthase subunit e, mitochondrial OS=Homo sapiens OX=9606 GN=ATP5ME PE=1 SV=2                                       | -0,134934859 | 0,524192 |
| P09012 | U1 small nuclear ribonucleoprotein A OS=Homo sapiens OX=9606 GN=SNRPA PE=1 SV=3                                         | 0,105973107  | 0,524021 |
| P37198 | Nuclear pore glycoprotein p62 OS=Homo sapiens OX=9606 GN=NUP62 PE=1 SV=3                                                | -0,117712032 | 0,523662 |
| Q15654 | Thyroid receptor-interacting protein 6 OS=Homo sapiens OX=9606 GN=TRIP6 PE=1 SV=3                                       | -0,069533615 | 0,523494 |
| Q8WXX5 | DnaJ homolog subfamily C member 9 OS=Homo sapiens OX=9606 GN=DNAJC9 PE=1 SV=1                                           | -0,1176523   | 0,523364 |
| P10301 | Ras-related protein R-Ras OS=Homo sapiens OX=9606 GN=RRAS PE=1 SV=1                                                     | 0,084524207  | 0,523058 |
| P61289 | Proteasome activator complex subunit 3 OS=Homo sapiens OX=9606 GN=PSME3 PE=1 SV=1                                       | -0,0758627   | 0,522751 |
| Q9Y524 | Heme-binding protein 2 OS=Homo sapiens OX=9606 GN=HEBP2 PE=1 SV=1                                                       | -0,117508609 | 0,522648 |
| Q9BTC0 | Death-inducer obliterator 1 OS=Homo sapiens OX=9606 GN=DIDO1 PE=1 SV=5                                                  | 0,162849886  | 0,522253 |
| Q9Y639 | Neuroplastin OS=Homo sapiens OX=9606 GN=NPTN PE=1 SV=2                                                                  | 0,117429361  | 0,522253 |
| Q87C20 | Cancer-associated gene 1 protein OS=Homo sapiens OX=9606 GN=CAGE1 PE=1 SV=2                                             | -0,419397832 | 0,522249 |
| P57740 | Nuclear pore complex protein Nup107 OS=Homo sapiens OX=9606 GN=NUP107 PE=1 SV=1                                         | 0,10563351   | 0,522129 |
| Q969G5 | Caveolae-associated protein 3 OS=Homo sapiens OX=9606 GN=CAVIN3 PE=1 SV=3                                               | -0,084224894 | 0,520959 |
| Q9Y520 | Protein PRR2C OS=Homo sapiens OX=9606 GN=PRR2C PE=1 SV=4                                                                | -0,062101143 | 0,520881 |
| Q7LG56 | Ribonucleoside-diphosphate reductase subunit M2 B OS=Homo sapiens OX=9606 GN=RRM2B PE=1 SV=1                            | 0,134080961  | 0,520503 |
| P46776 | 60S ribosomal protein L27a OS=Homo sapiens OX=9606 GN=RPL27A PE=1 SV=2                                                  | -0,133906744 | 0,519751 |
| Q99436 | Proteasome subunit beta type-7 OS=Homo sapiens OX=9606 GN=PSMB7 PE=1 SV=1                                               | -0,071971054 | 0,518893 |
| Q9NR09 | Baculoviral IAP repeat-containing protein 6 OS=Homo sapiens OX=9606 GN=BIRC6 PE=1 SV=2                                  | 0,161732625  | 0,518335 |
| P35625 | Metalloproteinase inhibitor 3 OS=Homo sapiens OX=9606 GN=TIMP3 PE=1 SV=2                                                | 0,08378524   | 0,517879 |
| P12821 | Angiotensin-converting enzyme OS=Homo sapiens OX=9606 GN=ACE PE=1 SV=1                                                  | -0,226027901 | 0,515995 |
| P62753 | 40S ribosomal protein S6 OS=Homo sapiens OX=9606 GN=RPS6 PE=1 SV=1                                                      | 0,083401414  | 0,515193 |
| Q53FT3 | Protein Hikeshi OS=Homo sapiens OX=9606 GN=HIKESHI PE=1 SV=2                                                            | -0,225604769 | 0,514998 |
| Q5BJH7 | Protein YIF1B OS=Homo sapiens OX=9606 GN=YIF1B PE=1 SV=1                                                                | -0,160569536 | 0,514261 |
| Q9C0G0 | Zinc finger protein 407 OS=Homo sapiens OX=9606 GN=ZNF407 PE=1 SV=2                                                     | 0,215534473  | 0,513921 |
| Q96DV4 | 39S ribosomal protein L38, mitochondrial OS=Homo sapiens OX=9606 GN=MRPL38 PE=1 SV=2                                    | -0,160361025 | 0,51353  |
| Q9P035 | Very-long-chain (3R)-3-hydroxyacyl-CoA dehydratase 3 OS=Homo sapiens OX=9606 GN=HACD3 PE=1 SV=2                         | 0,095369751  | 0,513094 |
| P25786 | Proteasome subunit alpha type-1 OS=Homo sapiens OX=9606 GN=PSMA1 PE=1 SV=1                                              | 0,061270759  | 0,512963 |
| Q8N122 | Regulatory-associated protein of mTOR OS=Homo sapiens OX=9606 GN=RPOTR PE=1 SV=1                                        | 0,224507454  | 0,512415 |
| P08579 | U2 small nuclear ribonucleoprotein B'' OS=Homo sapiens OX=9606 GN=SNRBP2 PE=1 SV=1                                      | -0,132127128 | 0,512077 |
| P00167 | Cytochrome b5 OS=Homo sapiens OX=9606 GN=CYB5A PE=1 SV=2                                                                | -0,103596092 | 0,51081  |
| O15511 | Actin-related protein 2/3 complex subunit 5 OS=Homo sapiens OX=9606 GN=ARPC5 PE=1 SV=3                                  | 0,088216574  | 0,510596 |
| O43665 | Regulator of G-protein signaling 10 OS=Homo sapiens OX=9606 GN=RGSI10 PE=1 SV=3                                         | 0,223264724  | 0,509488 |
| P09493 | Tropomyosin alpha-1 chain OS=Homo sapiens OX=9606 GN=TPM1 PE=1 SV=2                                                     | -0,055711358 | 0,509479 |
| Q75643 | U5 small nuclear ribonucleoprotein 200 kDa helicase OS=Homo sapiens OX=9606 GN=SNRNP200 PE=1 SV=2                       | -0,044812541 | 0,509154 |
| Q9NXC5 | GATOR complex protein MIOS OS=Homo sapiens OX=9606 GN=MIOS PE=1 SV=2                                                    | 0,222941759  | 0,508727 |
| Q13144 | Translation initiation factor eIF-2B subunit epsilon OS=Homo sapiens OX=9606 GN=EIF2B5 PE=1 SV=3                        | 0,114483657  | 0,5076   |
| P51812 | Ribosomal protein S6 kinase alpha-3 OS=Homo sapiens OX=9606 GN=RPS6KA3 PE=1 SV=1                                        | 0,11445309   | 0,507448 |
| P54727 | UV excision repair protein RAD23 homolog B OS=Homo sapiens OX=9606 GN=RAD23B PE=1 SV=1                                  | -0,07753413  | 0,507417 |
| A5D8V6 | Vacuolar protein sorting-associated protein 37C OS=Homo sapiens OX=9606 GN=VPS37C PE=1 SV=2                             | -0,222203976 | 0,506989 |
| Q6DKJ4 | Nucleoredoxin OS=Homo sapiens OX=9606 GN=NXN PE=1 SV=2                                                                  | -0,073753808 | 0,506296 |
| Q9Y6R1 | Electrogenic sodium bicarbonate cotransporter 1 OS=Homo sapiens OX=9606 GN=SLC4A4 PE=1 SV=1                             | 0,158214833  | 0,506022 |
| Q8TD19 | Serine/threonine-protein kinase Nek9 OS=Homo sapiens OX=9606 GN=NEK9 PE=1 SV=2                                          | -0,070277864 | 0,505062 |
| O43615 | Mitochondrial import inner membrane translocase subunit TIM44 OS=Homo sapiens OX=9606 GN=TIMM44 PE=1 SV=2               | 0,102432024  | 0,504363 |

|        |                                                                                                                           |              |          |
|--------|---------------------------------------------------------------------------------------------------------------------------|--------------|----------|
| Q96D71 | RalBP1-associated Eps domain-containing protein 1 OS=Homo sapiens OX=9606 GN=REPS1 PE=1 SV=3                              | -0,220676551 | 0,50339  |
| Q9BU89 | Deoxyhypusine hydroxylase OS=Homo sapiens OX=9606 GN=DOHH PE=1 SV=1                                                       | -0,113500584 | 0,502726 |
| P55735 | Protein SEC13 homolog OS=Homo sapiens OX=9606 GN=SEC13 PE=1 SV=3                                                          | -0,0581663   | 0,501162 |
| P07197 | Neurofilament medium polypeptide OS=Homo sapiens OX=9606 GN=NEFM PE=1 SV=3                                                | 0,219230988  | 0,499983 |
| P61923 | Cootamer subunit zeta-1 OS=Homo sapiens OX=9606 GN=COPZ1 PE=1 SV=1                                                        | 0,129287154  | 0,499668 |
| P08237 | ATP-dependent 6-phosphofructokinase, muscle type OS=Homo sapiens OX=9606 GN=PFKM PE=1 SV=2                                | -0,086537631 | 0,499641 |
| Q9BR58 | La-related protein 6 OS=Homo sapiens OX=9606 GN=LARP6 PE=1 SV=1                                                           | -0,21902133  | 0,499489 |
| P10620 | Microsomal glutathione S-transferase 1 OS=Homo sapiens OX=9606 GN=MGST1 PE=1 SV=1                                         | 0,15632022   | 0,499404 |
| P62341 | Thioredoxin reductase-like selenoprotein T OS=Homo sapiens OX=9606 GN=SELENOT PE=1 SV=2                                   | 0,218837332  | 0,499056 |
| Q13439 | Golgin subfamily A member 4 OS=Homo sapiens OX=9606 GN=GOLGA4 PE=1 SV=1                                                   | 0,061829766  | 0,498857 |
| Q15046 | Lysine-tRNA ligase OS=Homo sapiens OX=9606 GN=KARS PE=1 SV=3                                                              | -0,046535328 | 0,498774 |
| O14562 | Ubiquitin domain-containing protein UBF1 OS=Homo sapiens OX=9606 GN=UBFD1 PE=1 SV=2                                       | 0,128989156  | 0,498589 |
| P50225 | Sulfotransferase 1A1 OS=Homo sapiens OX=9606 GN=SULT1A1 PE=1 SV=3                                                         | -0,386696116 | 0,49844  |
| Q8IX56 | Paralemmin-2 OS=Homo sapiens OX=9606 GN=PALM2 PE=1 SV=3                                                                   | 0,218517508  | 0,498302 |
| Q9H267 | Vacuolar protein sorting-associated protein 33B OS=Homo sapiens OX=9606 GN=VPS33B PE=1 SV=2                               | -0,112604809 | 0,498291 |
| P30043 | Flavin reductase (NADPH) OS=Homo sapiens OX=9606 GN=BLVRB PE=1 SV=3                                                       | -0,092837759 | 0,497772 |
| Q9UUI7 | GTP:AMP phosphotransferase AK3, mitochondrial OS=Homo sapiens OX=9606 GN=AK3 PE=1 SV=4                                    | 0,12878137   | 0,497698 |
| P40121 | Macrophage-capping protein OS=Homo sapiens OX=9606 GN=CAPG PE=1 SV=2                                                      | 0,072576021  | 0,497154 |
| O14744 | Protein arginine N-methyltransferase 5 OS=Homo sapiens OX=9606 GN=PRMT5 PE=1 SV=4                                         | 0,059545108  | 0,49659  |
| P07954 | Fumarate hydratase, mitochondrial OS=Homo sapiens OX=9606 GN=FB PE=1 SV=3                                                 | 0,056012602  | 0,496579 |
| P16234 | Platelet-derived growth factor receptor alpha OS=Homo sapiens OX=9606 GN=PDGFR PE=1 SV=1                                  | 0,128493483  | 0,496463 |
| P63098 | Calcineurin subunit B type 1 OS=Homo sapiens OX=9606 GN=PPP3R1 PE=1 SV=2                                                  | 0,217533976  | 0,495983 |
| Q16864 | V-type proton ATPase subunit F OS=Homo sapiens OX=9606 GN=ATP6V1F PE=1 SV=2                                               | -0,155298346 | 0,495838 |
| Q9UPQ0 | LIM and calponin homology domains-containing protein 1 OS=Homo sapiens OX=9606 GN=LIMCH1 PE=1 SV=4                        | 0,048214857  | 0,495633 |
| P31937 | 3-hydroxyisobutyrate dehydrogenase, mitochondrial OS=Homo sapiens OX=9606 GN=HIBADH PE=1 SV=2                             | 0,076143944  | 0,495555 |
| P28370 | Probable global transcription activator SNF2L1 OS=Homo sapiens OX=9606 GN=SMARCA1 PE=1 SV=2                               | -0,217344769 | 0,495537 |
| P35250 | Replication factor C subunit 2 OS=Homo sapiens OX=9606 GN=RFC2 PE=1 SV=3                                                  | -0,217027807 | 0,49479  |
| O75367 | Core histone macro-H2A.1 OS=Homo sapiens OX=9606 GN=H2AFY PE=1 SV=4                                                       | 0,076038707  | 0,494781 |
| Q9BX68 | Histidine triad nucleotide-binding protein 2, mitochondrial OS=Homo sapiens OX=9606 GN=HINT2 PE=1 SV=1                    | -0,111893973 | 0,494778 |
| Q15746 | Myosin light chain kinase, smooth muscle OS=Homo sapiens OX=9606 GN=MYLK PE=1 SV=4                                        | 0,068940854  | 0,494196 |
| Q9NV59 | Pyridoxine-5'-phosphate oxidase OS=Homo sapiens OX=9606 GN=PNPO PE=1 SV=1                                                 | -0,127739008 | 0,493231 |
| Q53QV2 | Protein LBH OS=Homo sapiens OX=9606 GN=LBH PE=1 SV=1                                                                      | 0,216316641  | 0,493113 |
| Q9BWJ5 | Splicing factor 3B subunit 5 OS=Homo sapiens OX=9606 GN=SF3B5 PE=1 SV=1                                                   | -0,154503419 | 0,493067 |
| P05121 | Plasminogen activator inhibitor 1 OS=Homo sapiens OX=9606 GN=SERPINE1 PE=1 SV=1                                           | 0,054077432  | 0,492545 |
| P18621 | 60S ribosomal protein L17 OS=Homo sapiens OX=9606 GN=RPL17 PE=1 SV=3                                                      | 0,085375827  | 0,492087 |
| ASYKK6 | CCR4-NOT transcription complex subunit 1 OS=Homo sapiens OX=9606 GN=CNOT1 PE=1 SV=2                                       | -0,065790663 | 0,491641 |
| P09874 | Poly [ADP-ribose] polymerase 1 OS=Homo sapiens OX=9606 GN=PARP1 PE=1 SV=4                                                 | -0,060995424 | 0,491237 |
| P41227 | N-alpha-acetyltransferase 10 OS=Homo sapiens OX=9606 GN=NAA10 PE=1 SV=1                                                   | -0,091604483 | 0,490342 |
| Q9NWU2 | Glucose-induced degradation protein 8 homolog OS=Homo sapiens OX=9606 GN=GD8 PE=1 SV=1                                    | -0,110930412 | 0,490021 |
| P62249 | 40S ribosomal protein S16 OS=Homo sapiens OX=9606 GN=RPS16 PE=1 SV=2                                                      | 0,091540753  | 0,489958 |
| P61960 | Ubiquitin-fold modifier 1 OS=Homo sapiens OX=9606 GN=UFM1 PE=1 SV=1                                                       | -0,1268469   | 0,489413 |
| O60231 | Pre-mRNA-splicing factor ATP-dependent RNA helicase DHX16 OS=Homo sapiens OX=9606 GN=DHX16 PE=1 SV=2                      | -0,214710031 | 0,489324 |
| Q3V672 | Girdin OS=Homo sapiens OX=9606 GN=CCDC88A PE=1 SV=2                                                                       | -0,21459506  | 0,489052 |
| P29558 | RNA-binding motif, single-stranded-interacting protein 1 OS=Homo sapiens OX=9606 GN=RBMS1 PE=1 SV=3                       | -0,214561271 | 0,488973 |
| Q8NH99 | Atlastin-2 OS=Homo sapiens OX=9606 GN=ATL2 PE=1 SV=2                                                                      | -0,21437843  | 0,488541 |
| Q9HBH5 | Retinol dehydrogenase 14 OS=Homo sapiens OX=9606 GN=RDH14 PE=1 SV=1                                                       | 0,214339151  | 0,488449 |
| P28288 | ATP-binding cassette sub-family D member 3 OS=Homo sapiens OX=9606 GN=ABCD3 PE=1 SV=1                                     | 0,079374328  | 0,487181 |
| Q9H993 | Damage-control phosphatase ARMT1 OS=Homo sapiens OX=9606 GN=ARMT1 PE=1 SV=1                                               | -0,110248273 | 0,486659 |
| P62244 | 40S ribosomal protein S15a OS=Homo sapiens OX=9606 GN=RPS15A PE=1 SV=2                                                    | -0,090969994 | 0,486527 |
| Q9BX40 | Protein LSM14 homolog B OS=Homo sapiens OX=9606 GN=LSM14B PE=1 SV=1                                                       | 0,152368074  | 0,48563  |
| Q9JB82 | Conserved oligomeric Golgi complex subunit 3 OS=Homo sapiens OX=9606 GN=COG3 PE=1 SV=3                                    | -0,152341833 | 0,485538 |
| Q9NXF1 | Testis-expressed protein 10 OS=Homo sapiens OX=9606 GN=TEX10 PE=1 SV=2                                                    | -0,152279637 | 0,485322 |
| Q96B26 | Exosome complex component RRP43 OS=Homo sapiens OX=9606 GN=EXOSC8 PE=1 SV=1                                               | 0,152250385  | 0,48522  |
| Q99805 | Transmembrane 9 superfamily member 2 OS=Homo sapiens OX=9606 GN=TM9SF2 PE=1 SV=1                                          | -0,078839192 | 0,483482 |
| O14880 | Microsomal glutathione S-transferase 3 OS=Homo sapiens OX=9606 GN=MGST3 PE=1 SV=1                                         | 0,098604239  | 0,483271 |
| P08574 | Cytochrome c1, heme protein, mitochondrial OS=Homo sapiens OX=9606 GN=CYC1 PE=1 SV=3                                      | -0,098449088 | 0,482242 |
| P52597 | Heterogeneous nuclear ribonucleoprotein F OS=Homo sapiens OX=9606 GN=HNRNPF PE=1 SV=3                                     | 0,0743458    | 0,482369 |
| Q96CM8 | AcyL-CoA synthetase family member 2, mitochondrial OS=Homo sapiens OX=9606 GN=ACSF2 PE=1 SV=2                             | 0,150825261  | 0,480265 |
| Q8WI9V | MAL gene-associated protein OS=Homo sapiens OX=9606 GN=MGA PE=1 SV=4                                                      | 0,150557631  | 0,479335 |
| Q9NQW7 | Xaa-Pro aminopeptidase 1 OS=Homo sapiens OX=9606 GN=XPNPEP1 PE=1 SV=3                                                     | 0,054280987  | 0,479228 |
| P55072 | Transitional endoplasmic reticulum ATPase OS=Homo sapiens OX=9606 GN=VCP PE=1 SV=4                                        | 0,028430029  | 0,47907  |
| P49459 | Ubiquitin-conjugating enzyme E2 A OS=Homo sapiens OX=9606 GN=UBE2A PE=1 SV=2                                              | -0,17365719  | 0,478743 |
| Q727G0 | Target of Nesh-SH3 OS=Homo sapiens OX=9606 GN=ABI3BP PE=1 SV=1                                                            | 0,124347938  | 0,478741 |
| Q8N1B4 | Vacuolar protein sorting-associated protein 52 homolog OS=Homo sapiens OX=9606 GN=VPS52 PE=1 SV=1                         | 0,23884056   | 0,4787   |
| Q6NVY1 | 3-hydroxyisobutyryl-CoA hydrolase, mitochondrial OS=Homo sapiens OX=9606 GN=HIBCH PE=1 SV=2                               | -0,097516316 | 0,477307 |
| Q9NVJ2 | ADP-ribosylation factor-like protein 8B OS=Homo sapiens OX=9606 GN=ARL8B PE=1 SV=1                                        | -0,209446463 | 0,476904 |
| P20618 | Proteasome subunit beta type-1 OS=Homo sapiens OX=9606 GN=PSMB1 PE=1 SV=2                                                 | 0,063867185  | 0,475434 |
| Q9ULH0 | Kinase D-interacting substrate of 220 kDa OS=Homo sapiens OX=9606 GN=KIDINS220 PE=1 SV=3                                  | -0,208339292 | 0,474291 |
| Q9NZ23 | Charged multivesicular body protein 5 OS=Homo sapiens OX=9606 GN=CHMP5 PE=1 SV=1                                          | -0,123124305 | 0,473529 |
| Q92747 | Actin-related protein 2/3 complex subunit 1A OS=Homo sapiens OX=9606 GN=ARPC1A PE=2 SV=2                                  | 0,057088573  | 0,473476 |
| P42338 | Phosphatidylinositol 4,5-bisphosphate 3-kinase catalytic subunit beta isoform OS=Homo sapiens OX=9606 GN=PIK3CB PE=1 SV=1 | 0,650768388  | 0,472489 |
| Q14157 | Ubiquitin-associated protein 2-like OS=Homo sapiens OX=9606 GN=UBAP2L PE=1 SV=2                                           | -0,049477945 | 0,4722   |
| P56192 | Methionine-tRNA ligase, cytoplasmic OS=Homo sapiens OX=9606 GN=MARS PE=1 SV=2                                             | 0,045238192  | 0,472173 |
| Q08AD1 | Calmodulin-regulated spectrin-associated protein 2 OS=Homo sapiens OX=9606 GN=CAMSAP2 PE=1 SV=3                           | -0,148416925 | 0,471903 |
| O95168 | NADH dehydrogenase [ubiquinone] 1 beta subcomplex subunit 4 OS=Homo sapiens OX=9606 GN=NDUFB4 PE=1 SV=3                   | -0,207178321 | 0,47155  |
| Q8NFH5 | Nucleoporin NUP35 OS=Homo sapiens OX=9606 GN=NUP35 PE=1 SV=1                                                              | -0,25726871  | 0,470555 |
| P69905 | Hemoglobin subunit alpha OS=Homo sapiens OX=9606 GN=HBA1 PE=1 SV=2                                                        | 0,287608576  | 0,470517 |
| Q9UM50 | NFU1 iron-sulfur cluster scaffold homolog, mitochondrial OS=Homo sapiens OX=9606 GN=NFU1 PE=1 SV=2                        | -0,206670339 | 0,470351 |
| P23141 | Liver carboxylesterase 1 OS=Homo sapiens OX=9606 GN=CES1 PE=1 SV=2                                                        | -0,072698077 | 0,470348 |
| Q15262 | Receptor-type tyrosine-phosphatase kappa OS=Homo sapiens OX=9606 GN=PTPRK PE=1 SV=2                                       | -0,206565316 | 0,470103 |
| P78560 | Death domain-containing protein CRADD OS=Homo sapiens OX=9606 GN=CRADD PE=1 SV=1                                          | -0,20654801  | 0,470062 |
| Q05209 | Tyrosine-protein phosphatase non-receptor type 12 OS=Homo sapiens OX=9606 GN=PTPN12 PE=1 SV=3                             | -0,088148758 | 0,469632 |
| P32322 | Pyrrrole-5-carboxylate reductase 1, mitochondrial OS=Homo sapiens OX=9606 GN=PYCR1 PE=1 SV=2                              | 0,068955306  | 0,469261 |
| P19525 | Interferon-induced, double-stranded RNA-activated protein kinase OS=Homo sapiens OX=9606 GN=EIF2AK2 PE=1 SV=2             | -0,063059618 | 0,468662 |
| Q8NE86 | Calcium uniporter protein, mitochondrial OS=Homo sapiens OX=9606 GN=MCU PE=1 SV=1                                         | -0,106461013 | 0,468062 |
| Q8WUP2 | Filamin-binding LIM protein 1 OS=Homo sapiens OX=9606 GN=FBLLIM1 PE=1 SV=2                                                | 0,065693111  | 0,468002 |
| Q15631 | Translin OS=Homo sapiens OX=9606 GN=TSN PE=1 SV=1                                                                         | 0,087820784  | 0,467676 |
| Q15369 | Elongin-C OS=Homo sapiens OX=9606 GN=ELOC PE=1 SV=1                                                                       | 0,095705439  | 0,467408 |
| P11172 | Uridine 5'-monophosphate synthase OS=Homo sapiens OX=9606 GN=UMPS PE=1 SV=1                                               | -0,072239137 | 0,467401 |
| P30049 | ATP synthase subunit delta, mitochondrial OS=Homo sapiens OX=9606 GN=ATP5F1D PE=1 SV=2                                    | -0,204506225 | 0,465241 |
| A1X283 | SH3 and PX domain-containing protein 2B OS=Homo sapiens OX=9606 GN=SH3PKD2B PE=1 SV=3                                     | -0,071959369 | 0,464978 |
| Q96FV2 | Secernin-2 OS=Homo sapiens OX=9606 GN=SCRN2 PE=1 SV=3                                                                     | -0,121064266 | 0,464773 |
| O43292 | Glycosylphosphatidylinositol anchor attachment 1 protein OS=Homo sapiens OX=9606 GN=GPA1 PE=1 SV=3                        | -0,204131921 | 0,464357 |
| P20337 | Ras-related protein Rab-3B OS=Homo sapiens OX=9606 GN=RAB3B PE=1 SV=2                                                     | 0,068311008  | 0,464332 |
| P61009 | Signal peptidase complex subunit 3 OS=Homo sapiens OX=9606 GN=SPCS3 PE=1 SV=1                                             | -0,146214067 | 0,464269 |
| O15397 | Importin-8 OS=Homo sapiens OX=9606 GN=IPO8 PE=1 SV=2                                                                      | 0,146160563  | 0,464084 |
| Q9GZV8 | Mitochondrial fission factor OS=Homo sapiens OX=9606 GN=MFF PE=1 SV=1                                                     | 0,120697341  | 0,463216 |
| O75970 | Multiple PDZ domain protein OS=Homo sapiens OX=9606 GN=MPDZ PE=1 SV=2                                                     | 0,203614777  | 0,463136 |

|         |                                                                                                               |              |          |
|---------|---------------------------------------------------------------------------------------------------------------|--------------|----------|
| P05386  | 60S acidic ribosomal protein P1 OS=Homo sapiens OX=9606 GN=RPLP1 PE=1 SV=1                                    | -0,145222659 | 0,460839 |
| Q9BY44  | Eukaryotic translation initiation factor 2A OS=Homo sapiens OX=9606 GN=EIF2A PE=1 SV=3                        | -0,05750127  | 0,459588 |
| Q15056  | Eukaryotic translation initiation factor 4H OS=Homo sapiens OX=9606 GN=EIF4H PE=1 SV=5                        | -0,071157257 | 0,45916  |
| P07737  | Pylorin-1 OS=Homo sapiens OX=9606 GN=PFN1 PE=1 SV=2                                                           | 0,05953916   | 0,458959 |
| Q14249  | Endonuclease G, mitochondrial OS=Homo sapiens OX=9606 GN=ENDOG PE=1 SV=4                                      | -0,201566692 | 0,458299 |
| Q14444  | Caprin-1 OS=Homo sapiens OX=9606 GN=CAPRIN1 PE=1 SV=2                                                         | 0,059450417  | 0,45819  |
| P02461  | Collagen alpha-1(III) chain OS=Homo sapiens OX=9606 GN=COL3A1 PE=1 SV=4                                       | 0,049399231  | 0,458172 |
| P49441  | Inositol polyphosphate 1-phosphatase OS=Homo sapiens OX=9606 GN=INPP1 PE=1 SV=1                               | -0,144293993 | 0,457627 |
| Q8IW50  | PHD finger protein 6 OS=Homo sapiens OX=9606 GN=PHF6 PE=1 SV=1                                                | 0,201197257  | 0,457426 |
| Q9NVV4  | Poly(A) RNA polymerase, mitochondrial OS=Homo sapiens OX=9606 GN=MTPAP PE=1 SV=1                              | -0,20111282  | 0,457227 |
| Q12805  | EGF-containing fibulin-like extracellular matrix protein 1 OS=Homo sapiens OX=9606 GN=EFEMP1 PE=1 SV=2        | 0,119076797  | 0,456349 |
| Q15643  | Thyroid receptor-interacting protein 11 OS=Homo sapiens OX=9606 GN=TRIP11 PE=1 SV=3                           | -0,059168099 | 0,455743 |
| Q9UBU9  | Nuclear RNA export factor 1 OS=Homo sapiens OX=9606 GN=NXF1 PE=1 SV=1                                         | 0,143127936  | 0,453599 |
| Q9NRG9  | Aladin OS=Homo sapiens OX=9606 GN=AAAS PE=1 SV=1                                                              | 0,142565209  | 0,451656 |
| P19320  | Vascular cell adhesion protein 1 OS=Homo sapiens OX=9606 GN=VCAM1 PE=1 SV=1                                   | -0,066645064 | 0,451632 |
| P22102  | Trifunctional purine biosynthetic protein adenosine-3 OS=Homo sapiens OX=9606 GN=GART PE=1 SV=1               | -0,041771729 | 0,451164 |
| Q6B7W6  | GRB10-interacting GYF protein 2 OS=Homo sapiens OX=9606 GN=GIYF2 PE=1 SV=1                                    | 0,06085612   | 0,450285 |
| P51805  | Plexin-A3 OS=Homo sapiens OX=9606 GN=PLXNA3 PE=1 SV=2                                                         | -0,117466762 | 0,449542 |
| Q8N6R0  | eEF1A lysine and N-terminal methyltransferase OS=Homo sapiens OX=9606 GN=EEF1AKNMT PE=1 SV=1                  | -0,19753699  | 0,44878  |
| Q9HCUS  | Prolactin regulatory element-binding protein OS=Homo sapiens OX=9606 GN=PREB PE=1 SV=2                        | 0,092180157  | 0,448243 |
| O14530  | Thioredoxin domain-containing protein 9 OS=Homo sapiens OX=9606 GN=TXNDC9 PE=1 SV=2                           | -0,102388733 | 0,448204 |
| Q9UIQ6  | Leucyl-cystinyl aminopeptidase OS=Homo sapiens OX=9606 GN=LNPEP PE=1 SV=3                                     | 0,066171857  | 0,448038 |
| Q9H8S9  | MOB kinase activator 1A OS=Homo sapiens OX=9606 GN=MOB1A PE=1 SV=4                                            | 0,084511384  | 0,448015 |
| Q76024  | Wolframin OS=Homo sapiens OX=9606 GN=WFS1 PE=1 SV=2                                                           | -0,102301641 | 0,44778  |
| Q9HCC0  | Methylcrotonoyl-CoA carboxylase beta chain, mitochondrial OS=Homo sapiens OX=9606 GN=MCCC2 PE=1 SV=1          | -0,102200487 | 0,447289 |
| Q13685  | Angio-associated migratory cell protein OS=Homo sapiens OX=9606 GN=AAMP PE=1 SV=2                             | 0,09197184   | 0,447115 |
| P51665  | 26S proteasome non-ATPase regulatory subunit 7 OS=Homo sapiens OX=9606 GN=PSMD7 PE=1 SV=2                     | 0,066030699  | 0,446966 |
| P43378  | Tyrosine-protein phosphatase non-receptor type 9 OS=Homo sapiens OX=9606 GN=PTPN9 PE=1 SV=1                   | 0,141146157  | 0,446762 |
| O95248  | Myotubularin-related protein 5 OS=Homo sapiens OX=9606 GN=SBF1 PE=1 SV=4                                      | -0,116719897 | 0,44639  |
| Q3VE7   | Rab-like protein 6 OS=Homo sapiens OX=9606 GN=RABL6 PE=1 SV=2                                                 | 0,116719032  | 0,446386 |
| Q07954  | Prolow-density lipoprotein receptor-related protein 1 OS=Homo sapiens OX=9606 GN=LRP1 PE=1 SV=2               | -0,020124946 | 0,445763 |
| O00560  | Syntenin-1 OS=Homo sapiens OX=9606 GN=SDCBP PE=1 SV=1                                                         | 0,116506066  | 0,445488 |
| Q14672  | Disintegrin and metalloproteinase domain-containing protein 10 OS=Homo sapiens OX=9606 GN=ADAM10 PE=1 SV=1    | -0,140664662 | 0,445103 |
| Q15750  | TGF-beta-activated kinase 1 and MAP3K7-binding protein 1 OS=Homo sapiens OX=9606 GN=TAB1 PE=1 SV=1            | -0,195735503 | 0,444523 |
| O43166  | Signal-induced proliferation-associated 1-like protein 1 OS=Homo sapiens OX=9606 GN=SIPALL1 PE=1 SV=4         | 0,06559557   | 0,443667 |
| O00629  | Importin subunit alpha-3 OS=Homo sapiens OX=9606 GN=KPNA4 PE=1 SV=1                                           | 0,065524303  | 0,443127 |
| Q86V85  | Integral membrane protein GPR180 OS=Homo sapiens OX=9606 GN=GPR180 PE=2 SV=1                                  | 0,173098242  | 0,442592 |
| Q13885  | Tubulin beta-2A chain OS=Homo sapiens OX=9606 GN=TUBB2A PE=1 SV=1                                             | 0,035975842  | 0,442572 |
| Q9GZT6  | Coiled-coil domain-containing protein 90B, mitochondrial OS=Homo sapiens OX=9606 GN=CCDC90B PE=1 SV=2         | 0,164530753  | 0,442315 |
| Q06265  | Exosome complex component RRP45 OS=Homo sapiens OX=9606 GN=EXOSC9 PE=1 SV=3                                   | -0,194275738 | 0,441074 |
| Q969E4  | Transcription elongation factor A protein-like 3 OS=Homo sapiens OX=9606 GN=TCEAL3 PE=1 SV=1                  | 0,194208422  | 0,440915 |
| Q01432  | AMP deaminase 3 OS=Homo sapiens OX=9606 GN=AMPD3 PE=1 SV=1                                                    | 0,194008742  | 0,440444 |
| Q15029  | 116 kDa U5 small nuclear ribonucleoprotein component OS=Homo sapiens OX=9606 GN=EFUD2 PE=1 SV=1               | -0,046446583 | 0,439745 |
| Q13614  | Myotubularin-related protein 2 OS=Homo sapiens OX=9606 GN=MTMR2 PE=1 SV=4                                     | -0,30246454  | 0,439454 |
| Q9H2U2  | Inorganic pyrophosphatase 2, mitochondrial OS=Homo sapiens OX=9606 GN=PPA2 PE=1 SV=2                          | 0,06835022   | 0,438913 |
| P54289  | Voltage-dependent calcium channel subunit alpha-2/delta-1 OS=Homo sapiens OX=9606 GN=CACNA2D1 PE=1 SV=3       | -0,062029963 | 0,438803 |
| Q92552  | 28S ribosomal protein S27, mitochondrial OS=Homo sapiens OX=9606 GN=MRPS27 PE=1 SV=3                          | 0,193207356  | 0,43855  |
| P28482  | Mitogen-activated protein kinase 1 OS=Homo sapiens OX=9606 GN=MAPK1 PE=1 SV=3                                 | 0,055146895  | 0,438504 |
| Q9HCJ1  | Progressive ankylosis protein homolog OS=Homo sapiens OX=9606 GN=ANKH PE=1 SV=2                               | -0,193158709 | 0,438435 |
| P62913  | 60S ribosomal protein L11 OS=Homo sapiens OX=9606 GN=RPL11 PE=1 SV=2                                          | 0,114818843  | 0,43838  |
| Q15286  | Ras-related protein Rab-35 OS=Homo sapiens OX=9606 GN=RAB35 PE=1 SV=1                                         | 0,090341106  | 0,438302 |
| Q86X24  | Spermatogenesis-associated serine-rich protein 2 OS=Homo sapiens OX=9606 GN=SPATS2 PE=1 SV=1                  | -0,106818572 | 0,437855 |
| O15498  | Synaptobrevin homolog YKT6 OS=Homo sapiens OX=9606 GN=YKT6 PE=1 SV=1                                          | 0,076907429  | 0,437702 |
| Q14139  | Ubiquitin conjugation factor E4 A OS=Homo sapiens OX=9606 GN=UBE4A PE=1 SV=2                                  | 0,138458251  | 0,437508 |
| O43768  | Alpha-endosulfine OS=Homo sapiens OX=9606 GN=ENSA PE=1 SV=1                                                   | -0,11456741  | 0,437323 |
| O76041  | Neuletulle OS=Homo sapiens OX=9606 GN=NEBL PE=1 SV=1                                                          | 0,353895635  | 0,4367   |
| P09619  | Platelet-derived growth factor receptor beta OS=Homo sapiens OX=9606 GN=PDGFRB PE=1 SV=1                      | 0,047277191  | 0,436106 |
| Q15067  | Peroxisomal acyl-coenzyme A oxidase 1 OS=Homo sapiens OX=9606 GN=ACOX1 PE=1 SV=3                              | 0,064488612  | 0,435295 |
| P62256  | Ubiquitin-conjugating enzyme E2 H OS=Homo sapiens OX=9606 GN=UBE2H PE=1 SV=1                                  | -0,112576241 | 0,435003 |
| P38646  | Stress-70 protein, mitochondrial OS=Homo sapiens OX=9606 GN=HSPA9 PE=1 SV=2                                   | 0,037630147  | 0,434289 |
| Q96125  | Splicing factor 45 OS=Homo sapiens OX=9606 GN=RBM17 PE=1 SV=1                                                 | 0,191229097  | 0,433876 |
| A8MWD9  | Putative small nuclear ribonucleoprotein G-like protein 15 OS=Homo sapiens OX=9606 GN=SNRPGP15 PE=5 SV=2      | -0,136971063 | 0,432397 |
| Q14644  | Ras GTPase-activating protein 3 OS=Homo sapiens OX=9606 GN=RASA3 PE=1 SV=3                                    | -0,136942649 | 0,4323   |
| P54577  | Tyrosine--tRNA ligase, cytoplasmic OS=Homo sapiens OX=9606 GN=YARS PE=1 SV=4                                  | -0,038760212 | 0,432142 |
| Q9NSK0  | Kinesin light chain 4 OS=Homo sapiens OX=9606 GN=KLC4 PE=1 SV=3                                               | 0,089179851  | 0,432004 |
| Q9UPU5  | Ubiquitin carboxyl-terminal hydrolase 24 OS=Homo sapiens OX=9606 GN=USP24 PE=1 SV=3                           | 0,113185587  | 0,431516 |
| Q72381  | Neuronal growth regulator 1 OS=Homo sapiens OX=9606 GN=NEGR1 PE=1 SV=3                                        | -0,098913246 | 0,431369 |
| P09601  | Heme oxygenase 1 OS=Homo sapiens OX=9606 GN=HMBOX1 PE=1 SV=1                                                  | -0,058557031 | 0,431264 |
| P23921  | Ribonucleoside-diphosphate reductase large subunit OS=Homo sapiens OX=9606 GN=RRM1 PE=1 SV=1                  | 0,058536601  | 0,431096 |
| P16298  | #N/D                                                                                                          | 0,09870433   | 0,43036  |
| Q96BP3  | Peptidylprolyl isomerase domain and WD repeat-containing protein 1 OS=Homo sapiens OX=9606 GN=PPWD1 PE=1 SV=1 | -0,305105155 | 0,430217 |
| Q9NWN25 | Uridine-cytidine kinase-like 1 OS=Homo sapiens OX=9606 GN=UCKL1 PE=1 SV=2                                     | 0,043636204  | 0,429622 |
| Q8IY67  | Ribonucleoprotein PTB-binding 1 OS=Homo sapiens OX=9606 GN=RAVER1 PE=1 SV=1                                   | 0,215674866  | 0,429339 |
| Q9NYP7  | Elongation of very long chain fatty acids protein 5 OS=Homo sapiens OX=9606 GN=ELOVL5 PE=1 SV=1               | -0,082370411 | 0,428705 |
| P04114  | Apolipoprotein B-100 OS=Homo sapiens OX=9606 GN=APOB PE=1 SV=2                                                | -0,088536683 | 0,428585 |
| Q9H9H4  | Vacuolar protein sorting-associated protein 37B OS=Homo sapiens OX=9606 GN=VPS37B PE=1 SV=1                   | 0,13475131   | 0,424782 |
| P18084  | Integrin beta-5 OS=Homo sapiens OX=9606 GN=ITGB5 PE=1 SV=1                                                    | 0,042897672  | 0,4239   |
| O95260  | Arginyl-tRNA--protein transferase 1 OS=Homo sapiens OX=9606 GN=ATE1 PE=1 SV=2                                 | -0,186975783 | 0,423826 |
| Q96T88  | E3 ubiquitin-protein ligase UHRF1 OS=Homo sapiens OX=9606 GN=UHRF1 PE=1 SV=1                                  | 0,134436678  | 0,423704 |
| Q12849  | G-rich sequence factor 1 OS=Homo sapiens OX=9606 GN=GRSF1 PE=1 SV=3                                           | -0,069929658 | 0,422709 |
| Q13442  | 28 kDa heat- and acid-stable phosphoprotein OS=Homo sapiens OX=9606 GN=PDAP1 PE=1 SV=1                        | -0,096955636 | 0,421933 |
| Q8N7R7  | Cyclin-Y-like protein 1 OS=Homo sapiens OX=9606 GN=CCNYL1 PE=1 SV=2                                           | 0,18611169   | 0,421784 |
| P51159  | Ras-related protein Rab-27A OS=Homo sapiens OX=9606 GN=RAB27A PE=1 SV=3                                       | 0,074560284  | 0,421543 |
| P78406  | mRNA export factor OS=Homo sapiens OX=9606 GN=RAE1 PE=1 SV=1                                                  | -0,096853624 | 0,421442 |
| Q8WX92  | Negative elongation factor B OS=Homo sapiens OX=9606 GN=NELFB PE=1 SV=1                                       | 0,185540226  | 0,420434 |
| P22570  | NADPH:adrenodoxin oxidoreductase, mitochondrial OS=Homo sapiens OX=9606 GN=FDXR PE=1 SV=3                     | -0,185464869 | 0,420256 |
| Q96I99  | Succinate--CoA ligase [GDP-forming] subunit beta, mitochondrial OS=Homo sapiens OX=9606 GN=SUCLG2 PE=1 SV=2   | -0,065728366 | 0,420159 |
| P05023  | Sodium/potassium-transporting ATPase subunit alpha-1 OS=Homo sapiens OX=9606 GN=ATP1A1 PE=1 SV=1              | -0,038445807 | 0,419706 |
| P28062  | Proteasome subunit beta type-8 OS=Homo sapiens OX=9606 GN=PSMB8 PE=1 SV=3                                     | 0,185035229  | 0,419241 |
| O75462  | Cytokine receptor-like factor 1 OS=Homo sapiens OX=9606 GN=CRLF1 PE=1 SV=1                                    | 0,185025331  | 0,419217 |
| O43172  | U4/U6 small nuclear ribonucleoprotein Prp4 OS=Homo sapiens OX=9606 GN=PRPF4 PE=1 SV=2                         | -0,086781112 | 0,419167 |
| P21283  | V-type proton ATPase subunit C 1 OS=Homo sapiens OX=9606 GN=ATP6V1C1 PE=1 SV=4                                | 0,069311629  | 0,418551 |
| Q9P2R3  | Rab-nuclein-5 OS=Homo sapiens OX=9606 GN=ANKFY1 PE=1 SV=2                                                     | 0,065466638  | 0,418295 |
| Q15847  | Adipogenesis regulatory factor OS=Homo sapiens OX=9606 GN=ADIRF PE=1 SV=1                                     | -0,109999603 | 0,418173 |
| Q9Y551  | Transient receptor potential cation channel subfamily V member 2 OS=Homo sapiens OX=9606 GN=TRPV2 PE=1 SV=1   | -0,065313442 | 0,417205 |
| Q9BS40  | Latexin OS=Homo sapiens OX=9606 GN=LXN PE=1 SV=2                                                              | -0,184096493 | 0,417023 |
| P57764  | Gasdermin-D OS=Homo sapiens OX=9606 GN=GSDMD PE=1 SV=1                                                        | 0,0959071    | 0,416893 |
| Q96N67  | Dedicator of cytokinesis protein 7 OS=Homo sapiens OX=9606 GN=DOCK7 PE=1 SV=4                                 | -0,049120754 | 0,414346 |

|        |                                                                                                                                |              |          |
|--------|--------------------------------------------------------------------------------------------------------------------------------|--------------|----------|
| P39748 | Flap endonuclease 1 OS=Homo sapiens OX=9606 GN=FEN1 PE=1 SV=1                                                                  | 0,131671916  | 0,414244 |
| Q9H624 | Ran-binding protein 3 OS=Homo sapiens OX=9606 GN=RANBP3 PE=1 SV=1                                                              | 0,085831663  | 0,414089 |
| Q9NP79 | Vacuolar protein sorting-associated protein VTA1 homolog OS=Homo sapiens OX=9606 GN=VTA1 PE=1 SV=1                             | 0,068601856  | 0,413784 |
| O95674 | Phosphatidate cytidyltransferase 2 OS=Homo sapiens OX=9606 GN=CDS2 PE=1 SV=1                                                   | -0,43385045  | 0,412805 |
| Q96J66 | Syndetin OS=Homo sapiens OX=9606 GN=VPS50 PE=1 SV=3                                                                            | 0,13098609   | 0,411901 |
| Q8NEW0 | Zinc transporter 7 OS=Homo sapiens OX=9606 GN=SLC30A7 PE=2 SV=1                                                                | -0,181896167 | 0,411824 |
| P83916 | Chromobox protein homolog 1 OS=Homo sapiens OX=9606 GN=CBX1 PE=1 SV=1                                                          | 0,18178946   | 0,411572 |
| Q99523 | Sortilin OS=Homo sapiens OX=9606 GN=SORT1 PE=1 SV=3                                                                            | -0,108293745 | 0,411054 |
| Q53HC0 | Coiled-coil domain-containing protein 92 OS=Homo sapiens OX=9606 GN=CCDC92 PE=1 SV=2                                           | -0,250778142 | 0,410954 |
| O95447 | Lebercilin-like protein OS=Homo sapiens OX=9606 GN=LCA5L PE=1 SV=1                                                             | 0,692618124  | 0,410722 |
| Q9GZZ1 | N-alpha-acetyltransferase 50 OS=Homo sapiens OX=9606 GN=NAA50 PE=1 SV=1                                                        | -0,130570949 | 0,410484 |
| P12081 | Histidine-tRNA ligase, cytoplasmic OS=Homo sapiens OX=9606 GN=HARS PE=1 SV=2                                                   | -0,042634034 | 0,410384 |
| O14495 | Phospholipid phosphatase 3 OS=Homo sapiens OX=9606 GN=PLPP3 PE=1 SV=1                                                          | -0,072516437 | 0,409975 |
| P53367 | Arfaptin-1 OS=Homo sapiens OX=9606 GN=ARFIP1 PE=1 SV=2                                                                         | -0,07245011  | 0,409558 |
| P45973 | Chromobox protein homolog 5 OS=Homo sapiens OX=9606 GN=CBX5 PE=1 SV=1                                                          | 0,130019504  | 0,408602 |
| P15502 | Elastin OS=Homo sapiens OX=9606 GN=ELN PE=1 SV=4                                                                               | -0,067788781 | 0,408336 |
| P18077 | 60S ribosomal protein L35a OS=Homo sapiens OX=9606 GN=RPL35A PE=1 SV=2                                                         | 0,084721693  | 0,408165 |
| O75150 | E3 ubiquitin-protein ligase BRE1B OS=Homo sapiens OX=9606 GN=RNFA40 PE=1 SV=5                                                  | -0,180244056 | 0,407921 |
| O95400 | CD2 antigen cytoplasmic tail-binding protein 2 OS=Homo sapiens OX=9606 GN=CD2BP2 PE=1 SV=1                                     | -0,129817843 | 0,407914 |
| Q96IX5 | ATP synthase membrane subunit DAPIT, mitochondrial OS=Homo sapiens OX=9606 GN=ATP5MD PE=1 SV=1                                 | -0,071075341 | 0,407735 |
| P52701 | DNA mismatch repair protein Msh6 OS=Homo sapiens OX=9606 GN=MSH6 PE=1 SV=2                                                     | 0,107327012  | 0,407028 |
| P16152 | Carbonyl reductase [NADPH] 1 OS=Homo sapiens OX=9606 GN=CBR1 PE=1 SV=3                                                         | -0,053277204 | 0,405289 |
| Q8TCE6 | Protein FAM45A OS=Homo sapiens OX=9606 GN=FAM45A PE=2 SV=1                                                                     | -0,178929793 | 0,404817 |
| Q6P158 | Putative ATP-dependent RNA helicase DHX57 OS=Homo sapiens OX=9606 GN=DHX57 PE=1 SV=2                                           | -0,178854414 | 0,404639 |
| Q8X655 | Histone-arginine methyltransferase CARM1 OS=Homo sapiens OX=9606 GN=CARM1 PE=1 SV=3                                            | -0,067175092 | 0,404232 |
| Q9Y315 | Deoxyribose-phosphate aldolase OS=Homo sapiens OX=9606 GN=DERA PE=1 SV=2                                                       | -0,10626737  | 0,402621 |
| Q92633 | Lysophosphatidic acid receptor 1 OS=Homo sapiens OX=9606 GN=LPAR1 PE=1 SV=3                                                    | 0,177839379  | 0,402241 |
| P56182 | Ribosomal RNA processing protein 1 homolog A OS=Homo sapiens OX=9606 GN=RRP1 PE=1 SV=1                                         | -0,177792651 | 0,402131 |
| Q96EK7 | Constitutive coactivator of peroxisome proliferator-activated receptor gamma OS=Homo sapiens OX=9606 GN=FAM120B PE=1 SV=1      | -0,177345236 | 0,401074 |
| P29320 | Ephrin type-A receptor 3 OS=Homo sapiens OX=9606 GN=EPHA3 PE=1 SV=2                                                            | -0,377302765 | 0,400509 |
| Q8TB52 | F-box only protein 30 OS=Homo sapiens OX=9606 GN=FBXO30 PE=1 SV=3                                                              | -0,127402236 | 0,399683 |
| Q8NCW5 | NAD(P)H-hydrate epimerase OS=Homo sapiens OX=9606 GN=NAXE PE=1 SV=2                                                            | 0,092300977  | 0,399633 |
| Q96NY7 | HLAD intracellular channel protein 6 OS=Homo sapiens OX=9606 GN=CLIC6 PE=2 SV=3                                                | 0,24327122   | 0,399598 |
| O75884 | Putative hydrolase RBBP9 OS=Homo sapiens OX=9606 GN=RBBP9 PE=1 SV=2                                                            | 0,176061822  | 0,398043 |
| P07305 | Histone H1.0 OS=Homo sapiens OX=9606 GN=H1FO PE=1 SV=3                                                                         | -0,126733862 | 0,39741  |
| Q8TDY4 | Arf-GAP with SH3 domain, ANK repeat and PH domain-containing protein 3 OS=Homo sapiens OX=9606 GN=ASAP3 PE=1 SV=1              | 0,175532324  | 0,396793 |
| Q16890 | Tumor protein D53 OS=Homo sapiens OX=9606 GN=TPD52L1 PE=1 SV=1                                                                 | -0,12650347  | 0,396626 |
| Q99643 | Succinate dehydrogenase cytochrome b560 subunit, mitochondrial OS=Homo sapiens OX=9606 GN=SDHC PE=1 SV=1                       | 0,175448535  | 0,396595 |
| Q92597 | Protein NDRG1 OS=Homo sapiens OX=9606 GN=NDRG1 PE=1 SV=1                                                                       | 0,062372881  | 0,396378 |
| P61586 | Transforming protein RhoA OS=Homo sapiens OX=9606 GN=RHOA PE=1 SV=1                                                            | -0,104732659 | 0,396251 |
| P62318 | Small nuclear ribonucleoprotein Sm D3 OS=Homo sapiens OX=9606 GN=SNRPD3 PE=1 SV=1                                              | -0,104687775 | 0,396065 |
| Q8IX11 | Mitochondrial Rho GTPase 2 OS=Homo sapiens OX=9606 GN=RHOT2 PE=1 SV=2                                                          | 0,175023998  | 0,395592 |
| Q9BV44 | Tyrosine domain-containing protein 3 OS=Homo sapiens OX=9606 GN=THUMPD3 PE=1 SV=1                                              | 0,174876423  | 0,395244 |
| Q13938 | Calcyphosin OS=Homo sapiens OX=9606 GN=CAPS PE=1 SV=2                                                                          | -0,174623307 | 0,394646 |
| P12931 | Proto-oncogene tyrosine-protein kinase Src OS=Homo sapiens OX=9606 GN=SRC PE=1 SV=3                                            | -0,174590186 | 0,394568 |
| Q72610 | E3 ubiquitin-protein ligase SH3RF1 OS=Homo sapiens OX=9606 GN=SH3RF1 PE=1 SV=2                                                 | 0,174436494  | 0,394205 |
| P62314 | Small nuclear ribonucleoprotein Sm D1 OS=Homo sapiens OX=9606 GN=SNRPD1 PE=1 SV=1                                              | 0,125699004  | 0,393895 |
| Q71386 | Hsp90 co-chaperone Cdc37-like 1 OS=Homo sapiens OX=9606 GN=CDC37L1 PE=1 SV=1                                                   | -0,174238561 | 0,393738 |
| Q9HC86 | Spondin-1 OS=Homo sapiens OX=9606 GN=SPON1 PE=1 SV=2                                                                           | -0,174193803 | 0,393632 |
| O15056 | Synaptojanin-2 OS=Homo sapiens OX=9606 GN=SYNJ2 PE=1 SV=3                                                                      | -0,081965662 | 0,393518 |
| P78324 | Tyrosine-protein phosphatase non-receptor type substrate 1 OS=Homo sapiens OX=9606 GN=SIRPA PE=1 SV=2                          | 0,104600756  | 0,393467 |
| O95208 | Epsin-2 OS=Homo sapiens OX=9606 GN=EPN2 PE=1 SV=3                                                                              | 0,125305128  | 0,392554 |
| Q9BZL4 | Protein phosphatase 1 regulatory subunit 12C OS=Homo sapiens OX=9606 GN=PPP1R12C PE=1 SV=1                                     | -0,125191738 | 0,392169 |
| Q9UK55 | Protein Z-dependent protease inhibitor OS=Homo sapiens OX=9606 GN=SERPINA10 PE=1 SV=1                                          | -0,213660251 | 0,391984 |
| O94901 | SUN domain-containing protein 1 OS=Homo sapiens OX=9606 GN=SUN1 PE=1 SV=3                                                      | -0,125100778 | 0,391866 |
| Q8NBL1 | Protein O-glucosyltransferase 1 OS=Homo sapiens OX=9606 GN=POGLUT1 PE=1 SV=1                                                   | -0,173334473 | 0,391603 |
| Q15404 | Ras suppressor protein 1 OS=Homo sapiens OX=9606 GN=RSU1 PE=1 SV=3                                                             | -0,05585556  | 0,390413 |
| Q14247 | Src substrate cortactin OS=Homo sapiens OX=9606 GN=CTTN PE=1 SV=2                                                              | 0,03669987   | 0,390331 |
| P46734 | Dual specificity mitogen-activated protein kinase kinase 3 OS=Homo sapiens OX=9606 GN=MAP2K3 PE=1 SV=2                         | -0,058471702 | 0,390318 |
| Q16134 | Electron transfer flavoprotein-ubiquinone oxidoreductase, mitochondrial OS=Homo sapiens OX=9606 GN=ETFDFH PE=1 SV=2            | 0,172334403  | 0,389242 |
| O43432 | Eukaryotic translation initiation factor 4 gamma 3 OS=Homo sapiens OX=9606 GN=EIF4G3 PE=1 SV=2                                 | 0,043824549  | 0,389053 |
| Q9BZF1 | Oxysterol-binding protein-related protein 8 OS=Homo sapiens OX=9606 GN=OSBPL8 PE=1 SV=3                                        | -0,068877945 | 0,387245 |
| Q9H3Q1 | Cdc42 effector protein 4 OS=Homo sapiens OX=9606 GN=CDC42EP4 PE=1 SV=1                                                         | -0,214900971 | 0,386806 |
| Q9Y379 | Nucleolar complex protein 2 homolog OS=Homo sapiens OX=9606 GN=NOC2L PE=1 SV=4                                                 | -0,12344483  | 0,386242 |
| Q9H4G0 | Band 4.1-like protein 1 OS=Homo sapiens OX=9606 GN=EPB41L1 PE=1 SV=2                                                           | -0,123093109 | 0,38505  |
| Q9H223 | EH domain-containing protein 4 OS=Homo sapiens OX=9606 GN=EHD4 PE=1 SV=1                                                       | 0,042240276  | 0,384597 |
| Q765P7 | Protein MTSS2 OS=Homo sapiens OX=9606 GN=MTSS2 PE=1 SV=1                                                                       | -0,170359709 | 0,384581 |
| Q9NVG8 | TBC1 domain family member 13 OS=Homo sapiens OX=9606 GN=TBC1D13 PE=1 SV=3                                                      | -0,080214143 | 0,384255 |
| O00160 | Unconventional myosin-Ib OS=Homo sapiens OX=9606 GN=MYO1F PE=1 SV=3                                                            | -0,623378301 | 0,384129 |
| P30153 | Serine/threonine-protein phosphatase 2A 65 kDa regulatory subunit A alpha isoform OS=Homo sapiens OX=9606 GN=PPP2R1A PE=1 SV=1 | -0,040173257 | 0,384106 |
| Q9NQ29 | Putative RNA-binding protein Luc7-like 1 OS=Homo sapiens OX=9606 GN=LUC7L PE=1 SV=1                                            | -0,10175462  | 0,383932 |
| P35244 | Replication protein A 14 kDa subunit OS=Homo sapiens OX=9606 GN=RPA3 PE=1 SV=1                                                 | -0,088978558 | 0,383834 |
| Q99538 | Legumain OS=Homo sapiens OX=9606 GN=LGMN PE=1 SV=1                                                                             | 0,122659744  | 0,383582 |
| Q8N766 | ER membrane protein complex subunit 1 OS=Homo sapiens OX=9606 GN=EMC1 PE=1 SV=1                                                | 0,04208729   | 0,383052 |
| Q66PJ3 | ADP-ribosylation factor-like protein 6-interacting protein 4 OS=Homo sapiens OX=9606 GN=ARL6IP4 PE=1 SV=2                      | 0,169709516  | 0,383047 |
| P42336 | Phosphatidylinositol 4,5-bisphosphate 3-kinase catalytic subunit alpha isoform OS=Homo sapiens OX=9606 GN=PIK3CA PE=1 SV=2     | -0,169616322 | 0,382827 |
| Q9VB86 | N-terminal Xaa-Pro-Lys N-methyltransferase 1 OS=Homo sapiens OX=9606 GN=NTMT1 PE=1 SV=3                                        | 0,088702254  | 0,382525 |
| Q14694 | Ubiquitin carboxyl-terminal hydrolase 10 OS=Homo sapiens OX=9606 GN=USP10 PE=1 SV=2                                            | 0,057405741  | 0,382443 |
| P08754 | Guanine nucleotide-binding protein G(i) subunit alpha OS=Homo sapiens OX=9606 GN=GNAI3 PE=1 SV=3                               | 0,088677575  | 0,382408 |
| Q9NQ51 | Cell death regulator Aven OS=Homo sapiens OX=9606 GN=AVEN PE=1 SV=1                                                            | -0,169416124 | 0,382354 |
| P20340 | Ras-related protein Rab-6A OS=Homo sapiens OX=9606 GN=RAB6A PE=1 SV=3                                                          | 0,122182641  | 0,381966 |
| Q92974 | Rho guanine nucleotide exchange factor 2 OS=Homo sapiens OX=9606 GN=ARHGEF2 PE=1 SV=4                                          | 0,048722746  | 0,381964 |
| Q86Y56 | Ras-related protein Rab-43 OS=Homo sapiens OX=9606 GN=RAB43 PE=1 SV=1                                                          | -0,117616627 | 0,381712 |
| Q9Y241 | HIG1 domain family member 1A, mitochondrial OS=Homo sapiens OX=9606 GN=HIGD1A PE=1 SV=1                                        | -0,168967054 | 0,381294 |
| Q9UI32 | Glutaminase liver isoform, mitochondrial OS=Homo sapiens OX=9606 GN=GLS2 PE=1 SV=2                                             | 0,168904553  | 0,381147 |
| Q8N6G6 | ADAMTS-like protein 1 OS=Homo sapiens OX=9606 GN=ADAMTSL1 PE=1 SV=4                                                            | 0,186163542  | 0,379883 |
| O60645 | EXOC3 complex component 3 OS=Homo sapiens OX=9606 GN=EXOC3 PE=1 SV=3                                                           | 0,079377556  | 0,379843 |
| P09622 | Dihydropyridol dehydrogenase, mitochondrial OS=Homo sapiens OX=9606 GN=DLD PE=1 SV=2                                           | -0,056919551 | 0,378861 |
| Q07092 | Collagen alpha-1(XVI) chain OS=Homo sapiens OX=9606 GN=COL16A1 PE=1 SV=2                                                       | -0,167917246 | 0,378817 |
| P23284 | Peptidyl-prolyl cis-trans isomerase B OS=Homo sapiens OX=9606 GN=PPIB PE=1 SV=2                                                | -0,043977881 | 0,378649 |
| O43920 | NADH dehydrogenase [ubiquinone] iron-sulfur protein 5 OS=Homo sapiens OX=9606 GN=NDUFS5 PE=1 SV=3                              | 0,100176332  | 0,377425 |
| O00622 | CCN family member 1 OS=Homo sapiens OX=9606 GN=CCN1 PE=1 SV=1                                                                  | -0,045123663 | 0,377033 |
| O00400 | Acetyl-coenzyme A transporter 1 OS=Homo sapiens OX=9606 GN=SLC33A1 PE=1 SV=1                                                   | 0,120647066  | 0,376772 |
| Q9NZN3 | #N/D                                                                                                                           | 0,06718904   | 0,376771 |
| O00151 | PDZ and LIM domain protein 1 OS=Homo sapiens OX=9606 GN=PDLLIM1 PE=1 SV=4                                                      | -0,04981976  | 0,376201 |
| Q8NFF5 | FAD synthase OS=Homo sapiens OX=9606 GN=FLAD1 PE=1 SV=1                                                                        | 0,292466663  | 0,375567 |
| P14324 | Farnesyl pyrophosphate synthase OS=Homo sapiens OX=9606 GN=FDPS PE=1 SV=4                                                      | -0,099664872 | 0,37532  |
| Q9HCE1 | Helicase MOV-10 OS=Homo sapiens OX=9606 GN=MOV10 PE=1 SV=2                                                                     | 0,066884402  | 0,374886 |

|        |                                                                                                                         |              |          |
|--------|-------------------------------------------------------------------------------------------------------------------------|--------------|----------|
| O95865 | N(G),N(G)-dimethylarginine dimethylaminohydrolase 2 OS=Homo sapiens OX=9606 GN=DDAH2 PE=1 SV=1                          | -0,05637782  | 0,374876 |
| Q6P587 | Acylpyruvate FAHD1, mitochondrial OS=Homo sapiens OX=9606 GN=FAHD1 PE=1 SV=2                                            | 0,120070532  | 0,374824 |
| Q75821 | Eukaryotic translation initiation factor 3 subunit G OS=Homo sapiens OX=9606 GN=EIF3G PE=1 SV=2                         | 0,051512477  | 0,373967 |
| Q96K85 | Lymphokine-activated killer T-cell-originated protein kinase OS=Homo sapiens OX=9606 GN=PBK PE=1 SV=3                   | 0,086845626  | 0,373744 |
| Q9Y4K4 | Mitogen-activated protein kinase kinase kinase 5 OS=Homo sapiens OX=9606 GN=MAP4K5 PE=1 SV=2                            | 0,062450091  | 0,372881 |
| Q15637 | Splicing factor 1 OS=Homo sapiens OX=9606 GN=SF1 PE=1 SV=4                                                              | 0,056058805  | 0,372533 |
| P09972 | Fructose-bisphosphate aldolase C OS=Homo sapiens OX=9606 GN=ALDOC PE=1 SV=2                                             | -0,165236152 | 0,372493 |
| Q9H583 | HEAT repeat-containing protein 1 OS=Homo sapiens OX=9606 GN=HEATR1 PE=1 SV=3                                            | 0,119316367  | 0,372277 |
| Q5VTL8 | Pre-mRNA-splicing factor 3B8 OS=Homo sapiens OX=9606 GN=PRPF3B PE=1 SV=1                                                | -0,134082668 | 0,372191 |
| Q6IQ22 | Ras-related protein Rab-12 OS=Homo sapiens OX=9606 GN=RAB12 PE=1 SV=3                                                   | -0,164939744 | 0,371794 |
| O15400 | Syntaxin-7 OS=Homo sapiens OX=9606 GN=STX7 PE=1 SV=4                                                                    | -0,066201561 | 0,370669 |
| Q9NRG4 | N-lysine methyltransferase SMYD2 OS=Homo sapiens OX=9606 GN=SMYD2 PE=1 SV=2                                             | -0,164389426 | 0,370496 |
| Q16775 | Hydroxyacylglutathione hydrolase, mitochondrial OS=Homo sapiens OX=9606 GN=HAGH PE=1 SV=2                               | 0,077475248  | 0,369882 |
| Q9UN52 | COP9 signalosome complex subunit 3 OS=Homo sapiens OX=9606 GN=COPS3 PE=1 SV=3                                           | 0,055657712  | 0,36959  |
| Q8NDA8 | Maestro heat-like repeat-containing protein family member 1 OS=Homo sapiens OX=9606 GN=MROH1 PE=2 SV=3                  | -0,163823213 | 0,36916  |
| P09001 | 39S ribosomal protein L3, mitochondrial OS=Homo sapiens OX=9606 GN=MRPL3 PE=1 SV=1                                      | 0,118295976  | 0,368834 |
| Q9UBF2 | Cootamer subunit gamma-2 OS=Homo sapiens OX=9606 GN=COPG2 PE=1 SV=1                                                     | -0,085737688 | 0,368519 |
| Q9NZJ4 | Sacsin OS=Homo sapiens OX=9606 GN=SACS PE=1 SV=2                                                                        | -0,16342318  | 0,368217 |
| Q8WVY7 | Ubiquitin-like domain-containing CTD phosphatase 1 OS=Homo sapiens OX=9606 GN=UBLCP1 PE=1 SV=2                          | -0,085655256 | 0,368131 |
| Q9UHX1 | Poly(U)-binding-splicing factor PUF60 OS=Homo sapiens OX=9606 GN=PUF60 PE=1 SV=1                                        | 0,058289874  | 0,367776 |
| P22059 | Oxysterol-binding protein 1 OS=Homo sapiens OX=9606 GN=OSBP PE=1 SV=1                                                   | -0,061655278 | 0,36765  |
| Q00267 | Transcription elongation factor SPT5 OS=Homo sapiens OX=9606 GN=SUPT5H PE=1 SV=1                                        | 0,070665794  | 0,367439 |
| Q9Y2Q3 | Glutathione S-transferase kappa 1 OS=Homo sapiens OX=9606 GN=GSTK1 PE=1 SV=3                                            | 0,061543862  | 0,366918 |
| P61225 | Ras-related protein Rap-2b OS=Homo sapiens OX=9606 GN=RAP2B PE=1 SV=1                                                   | 0,16237933   | 0,365756 |
| Q9C0C2 | 182 kDa tankyrase-1-binding protein OS=Homo sapiens OX=9606 GN=TNKS1BP1 PE=1 SV=4                                       | 0,030283151  | 0,365214 |
| P39656 | Dolichyl-diphosphooligosaccharide-protein glycosyltransferase 48 kDa subunit OS=Homo sapiens OX=9606 GN=DDOST PE=1 SV=4 | 0,048459383  | 0,364862 |
| P22234 | Multifunctional protein ADE2 OS=Homo sapiens OX=9606 GN=PAICS PE=1 SV=3                                                 | -0,045197078 | 0,364802 |
| Q8TCS8 | Polyribonucleotide nucleotidyltransferase 1, mitochondrial OS=Homo sapiens OX=9606 GN=PNPT1 PE=1 SV=2                   | -0,117042546 | 0,364611 |
| Q9BRR6 | ADP-dependent glucokinase OS=Homo sapiens OX=9606 GN=ADPGK PE=1 SV=1                                                    | -0,084884416 | 0,364502 |
| O95793 | Double-stranded RNA-binding protein Staufens homolog 1 OS=Homo sapiens OX=9606 GN=STAU1 PE=1 SV=2                       | 0,057713091  | 0,363765 |
| A0AVT1 | Ubiquitin-like modifier-activating enzyme 6 OS=Homo sapiens OX=9606 GN=UBA6 PE=1 SV=1                                   | 0,032626319  | 0,363635 |
| P51149 | Ras-related protein Rab-7a OS=Homo sapiens OX=9606 GN=RAB7A PE=1 SV=1                                                   | -0,052316742 | 0,363147 |
| Q9NXR1 | #N/D                                                                                                                    | 0,081179962  | 0,361846 |
| Q9H1E5 | Thioredoxin-related transmembrane protein 4 OS=Homo sapiens OX=9606 GN=TMX4 PE=1 SV=1                                   | -0,160538456 | 0,361477 |
| P51114 | Fragile X mental retardation syndrome-related protein 1 OS=Homo sapiens OX=9606 GN=FXR1 PE=1 SV=3                       | 0,040894503  | 0,361231 |
| Q9BW91 | ADP-ribose pyrophosphatase, mitochondrial OS=Homo sapiens OX=9606 GN=NUDT9 PE=1 SV=1                                    | 0,115847502  | 0,360589 |
| Q15125 | 3-beta-hydroxysteroid-Delta(8),Delta(7)-isomerase OS=Homo sapiens OX=9606 GN=EBP PE=1 SV=3                              | -0,115839714 | 0,360563 |
| O15126 | Secretory carrier-associated membrane protein 1 OS=Homo sapiens OX=9606 GN=SCAMP1 PE=1 SV=2                             | -0,095884254 | 0,359811 |
| P62136 | Serine/threonine-protein phosphatase PP1-alpha catalytic subunit OS=Homo sapiens OX=9606 GN=PPP1CA PE=1 SV=1            | 0,041968901  | 0,359567 |
| Q5ZPR3 | CD276 antigen OS=Homo sapiens OX=9606 GN=CD276 PE=1 SV=1                                                                | -0,075353831 | 0,358739 |
| P05186 | Alkaline phosphatase, tissue-nonspecific isozyme OS=Homo sapiens OX=9606 GN=ALPL PE=1 SV=4                              | -0,095533344 | 0,358377 |
| P07585 | #N/D                                                                                                                    | 0,189157006  | 0,357873 |
| P14868 | Aspartate--tRNA ligase, cytoplasmic OS=Homo sapiens OX=9606 GN=DARS PE=1 SV=2                                           | 0,032156677  | 0,357855 |
| Q9Y6M7 | Sodium bicarbonate cotransporter 3 OS=Homo sapiens OX=9606 GN=SLC4A7 PE=1 SV=2                                          | -0,083452333 | 0,357776 |
| Q9NRY6 | Phospholipid scramblase 3 OS=Homo sapiens OX=9606 GN=PLSCR3 PE=1 SV=2                                                   | 0,114941848  | 0,357545 |
| P33240 | Cleavage stimulation factor subunit 2 OS=Homo sapiens OX=9606 GN=CSTF2 PE=1 SV=1                                        | 0,068882819  | 0,357262 |
| Q86X76 | Deaminated glutathione amidase OS=Homo sapiens OX=9606 GN=NIT1 PE=1 SV=2                                                | -0,08325447  | 0,356848 |
| Q6NUM9 | All-trans-retinol 13,14-reductase OS=Homo sapiens OX=9606 GN=RETSAT PE=1 SV=2                                           | 0,068764684  | 0,356589 |
| Q9UNH7 | Sorting nexin-6 OS=Homo sapiens OX=9606 GN=SNX6 PE=1 SV=1                                                               | -0,04280992  | 0,355728 |
| Q7UIM5 | 40S ribosomal protein S27-like OS=Homo sapiens OX=9606 GN=RPS27L PE=1 SV=3                                              | 0,114301309  | 0,355393 |
| Q5VY54 | Mesenteric estrogen-dependent adipogenesis protein OS=Homo sapiens OX=9606 GN=MEDAG PE=2 SV=1                           | -0,09437517  | 0,353646 |
| P40925 | Malate dehydrogenase, cytoplasmic OS=Homo sapiens OX=9606 GN=MDH1 PE=1 SV=4                                             | -0,047007209 | 0,352825 |
| P62910 | 60S ribosomal protein L32 OS=Homo sapiens OX=9606 GN=RPL32 PE=1 SV=2                                                    | 0,067993347  | 0,352202 |
| Q96GX9 | Methylthioribulose-1-phosphate dehydratase OS=Homo sapiens OX=9606 GN=APIP PE=1 SV=1                                    | 0,158218609  | 0,351098 |
| P61077 | Ubiquitin-conjugating enzyme E2 D3 OS=Homo sapiens OX=9606 GN=UBE2D3 PE=1 SV=1                                          | 0,112995059  | 0,351011 |
| O00541 | Pescadillo homolog OS=Homo sapiens OX=9606 GN=PES1 PE=1 SV=1                                                            | 0,112822399  | 0,350432 |
| POCG08 | Golgi pH regulator B OS=Homo sapiens OX=9606 GN=GPR89B PE=1 SV=1                                                        | -0,112800403 | 0,350358 |
| Q9P2W9 | Syntaxin-18 OS=Homo sapiens OX=9606 GN=STX18 PE=1 SV=1                                                                  | -0,155635765 | 0,349869 |
| Q08752 | Peptidyl-prolyl cis-trans isomerase D OS=Homo sapiens OX=9606 GN=PPID PE=1 SV=3                                         | 0,093444599  | 0,349852 |
| Q9NRN5 | Olfactomedin-like protein 3 OS=Homo sapiens OX=9606 GN=OLFML3 PE=2 SV=1                                                 | 0,185337247  | 0,349807 |
| Q08J23 | tRNA (cytosine(34)-C(5))-methyltransferase OS=Homo sapiens OX=9606 GN=NSUN2 PE=1 SV=2                                   | 0,058920447  | 0,349746 |
| Q9Y6D6 | Brefeldin A-inhibited guanine nucleotide-exchange protein 1 OS=Homo sapiens OX=9606 GN=ARFGEF1 PE=1 SV=2                | -0,093361833 | 0,349515 |
| P22307 | Non-specific lipid-transfer protein OS=Homo sapiens OX=9606 GN=SCP2 PE=1 SV=2                                           | 0,048388655  | 0,349033 |
| POC055 | Histone H2A.Z OS=Homo sapiens OX=9606 GN=H2AFZ PE=1 SV=2                                                                | 0,081509291  | 0,34868  |
| Q13085 | Acetyl-CoA carboxylase 1 OS=Homo sapiens OX=9606 GN=ACACA PE=1 SV=2                                                     | 0,081496274  | 0,348619 |
| O60486 | Pyrroline-C1 OS=Homo sapiens OX=9606 GN=PLXNC1 PE=1 SV=1                                                                | 0,154272043  | 0,346659 |
| Q53H96 | Pteridine-5-carboxylate reductase 3 OS=Homo sapiens OX=9606 GN=PYCR3 PE=1 SV=3                                          | -0,154240676 | 0,346585 |
| P36639 | 7,8-dihydro-8-oxoguanine triphosphatase OS=Homo sapiens OX=9606 GN=NUDT1 PE=1 SV=3                                      | 0,111609575  | 0,346369 |
| Q16513 | Serine/threonine-protein kinase N2 OS=Homo sapiens OX=9606 GN=PKN2 PE=1 SV=1                                            | 0,06696273   | 0,346353 |
| P05141 | ADP/ATP translocase 2 OS=Homo sapiens OX=9606 GN=SLC25A5 PE=1 SV=7                                                      | 0,06693992   | 0,346224 |
| Q9UMR2 | ATP-dependent RNA helicase DDX19B OS=Homo sapiens OX=9606 GN=DDX19B PE=1 SV=1                                           | 0,044536515  | 0,345898 |
| Q9P283 | Semaphorin-5B OS=Homo sapiens OX=9606 GN=SEMA5B PE=2 SV=4                                                               | 0,153867502  | 0,345706 |
| Q658Y4 | Protein FAM91A1 OS=Homo sapiens OX=9606 GN=FAM91A1 PE=1 SV=3                                                            | -0,092362291 | 0,345446 |
| Q5JRA6 | Transport and Golgi organization protein 1 homolog OS=Homo sapiens OX=9606 GN=MIA3 PE=1 SV=1                            | 0,05498876   | 0,344922 |
| O76021 | Ribosomal L1 domain-containing protein 1 OS=Homo sapiens OX=9606 GN=RSL1D1 PE=1 SV=3                                    | 0,047837466  | 0,344665 |
| Q15019 | Septin-2 OS=Homo sapiens OX=9606 GN=SEPTIN2 PE=1 SV=1                                                                   | -0,040317094 | 0,344007 |
| P11233 | Ras-related protein Ral-A OS=Homo sapiens OX=9606 GN=RALA PE=1 SV=1                                                     | 0,080470436  | 0,343831 |
| Q96C19 | EF-hand domain-containing protein D2 OS=Homo sapiens OX=9606 GN=EFHD2 PE=1 SV=1                                         | 0,057947316  | 0,343411 |
| P08066 | 40S ribosomal protein S20 OS=Homo sapiens OX=9606 GN=RPS20 PE=1 SV=1                                                    | 0,091818025  | 0,343233 |
| P53041 | Serine/threonine-protein phosphatase 5 OS=Homo sapiens OX=9606 GN=PPP5C PE=1 SV=1                                       | -0,049693874 | 0,343116 |
| Q9BXJ4 | Complement C1q tumor necrosis factor-related protein 3 OS=Homo sapiens OX=9606 GN=C1QTNF3 PE=1 SV=1                     | 0,152559781  | 0,342629 |
| Q9H1B7 | #N/D                                                                                                                    | -0,35987303  | 0,342427 |
| Q6ZMT4 | Lysine-specific demethylase 7A OS=Homo sapiens OX=9606 GN=KDM7A PE=1 SV=2                                               | 0,35202097   | 0,342337 |
| Q8TAE6 | Protein phosphatase 1 regulatory subunit 14C OS=Homo sapiens OX=9606 GN=PPP1R14C PE=1 SV=3                              | -0,15238777  | 0,342225 |
| Q13201 | Multimerin-1 OS=Homo sapiens OX=9606 GN=MMRN1 PE=1 SV=3                                                                 | 0,180374942  | 0,342059 |
| Q9NXR7 | BRISC and BRCA1-A complex member 2 OS=Homo sapiens OX=9606 GN=BABAM2 PE=1 SV=2                                          | 0,110309427  | 0,342019 |
| Q99614 | Tetrapeptide repeat protein 1 OS=Homo sapiens OX=9606 GN=TTCT1 PE=1 SV=1                                                | 0,066126486  | 0,341619 |
| Q9BV22 | Guanine nucleotide-binding protein-like 3 OS=Homo sapiens OX=9606 GN=GNL3 PE=1 SV=2                                     | 0,079858292  | 0,340979 |
| Q9BRG1 | Vacuolar protein-sorting-associated protein 25 OS=Homo sapiens OX=9606 GN=VPS25 PE=1 SV=1                               | -0,0798084   | 0,340746 |
| Q5BKZ1 | DBIR complex subunit ZNF326 OS=Homo sapiens OX=9606 GN=ZNF326 PE=1 SV=2                                                 | 0,091148753  | 0,340515 |
| P82909 | 28S ribosomal protein S36, mitochondrial OS=Homo sapiens OX=9606 GN=MRPS36 PE=1 SV=2                                    | -0,151503549 | 0,340145 |
| Q13948 | Protein CASP OS=Homo sapiens OX=9606 GN=CUX1 PE=1 SV=2                                                                  | 0,109729081  | 0,340079 |
| P56945 | Breast cancer anti-estrogen resistance protein 1 OS=Homo sapiens OX=9606 GN=BCAR1 PE=1 SV=2                             | -0,051604092 | 0,340076 |
| P17174 | Aspartate aminotransferase, cytoplasmic OS=Homo sapiens OX=9606 GN=GOT1 PE=1 SV=3                                       | 0,041047995  | 0,339648 |
| P18859 | ATP synthase-coupling factor 6, mitochondrial OS=Homo sapiens OX=9606 GN=ATP5PF PE=1 SV=1                               | -0,071652831 | 0,339496 |
| Q9P0J1 | [Pyruvate dehydrogenase [acetyl-transferring]]-phosphatase 1, mitochondrial OS=Homo sapiens OX=9606 GN=PDP1 PE=1 SV=3   | -0,151136479 | 0,339281 |
| Q96EY1 | DnaJ homolog subfamily A member 3, mitochondrial OS=Homo sapiens OX=9606 GN=DNAJA3 PE=1 SV=2                            | -0,109474215 | 0,339228 |
| Q9UNX3 | 60S ribosomal protein L26-like 1 OS=Homo sapiens OX=9606 GN=RPL26L1 PE=1 SV=1                                           | -0,066765743 | 0,338823 |

|         |                                                                                                                  |               |          |
|---------|------------------------------------------------------------------------------------------------------------------|---------------|----------|
| Q9UIF9  | Bromodomain adjacent to zinc finger domain protein 2A OS=Homo sapiens OX=9606 GN=BAZZA PE=1 SV=4                 | -0,34707914   | 0,338352 |
| Q8WYA6  | Beta-catenin-like protein 1 OS=Homo sapiens OX=9606 GN=CTNNB1 PE=1 SV=1                                          | 0,150690874   | 0,338233 |
| P62266  | 40S ribosomal protein S23 OS=Homo sapiens OX=9606 GN=RPS23 PE=1 SV=3                                             | 0,078992843   | 0,336951 |
| P54886  | Delta-1-pyrroline-5-carboxylate synthase OS=Homo sapiens OX=9606 GN=ALDH18A1 PE=1 SV=2                           | -0,032693916  | 0,336276 |
| Q8NFP1  | Nesprin-1 OS=Homo sapiens OX=9606 GN=SYNE1 PE=1 SV=4                                                             | 0,026936191   | 0,336091 |
| P53384  | Cytosolic Fe-S cluster assembly factor NUBP1 OS=Homo sapiens OX=9606 GN=NUBP1 PE=1 SV=2                          | -0,07097708   | 0,336    |
| Q5T447  | E3 ubiquitin-protein ligase HECTD3 OS=Homo sapiens OX=9606 GN=HECTD3 PE=1 SV=1                                   | 0,149427123   | 0,335262 |
| A2RRP1  | Neuroblastoma-amplified sequence OS=Homo sapiens OX=9606 GN=NBAS PE=1 SV=2                                       | 0,044835593   | 0,334952 |
| Q13126  | S-methyl-5'-thioadenosine phosphorylase OS=Homo sapiens OX=9606 GN=MTAP PE=1 SV=2                                | -0,050813119  | 0,334364 |
| Q96I20  | PRKC apoptosis WT1 regulator protein OS=Homo sapiens OX=9606 GN=PAWR PE=1 SV=1                                   | 0,053374455   | 0,333834 |
| Q9BRZ2  | E3 ubiquitin-protein ligase TRIM56 OS=Homo sapiens OX=9606 GN=TRIM56 PE=1 SV=3                                   | -0,025779433  | 0,333399 |
| Q12768  | WASH complex subunit 5 OS=Homo sapiens OX=9606 GN=WASHC5 PE=1 SV=1                                               | 0,050676157   | 0,333376 |
| P05156  | Complement factor I OS=Homo sapiens OX=9606 GN=CFI PE=1 SV=2                                                     | 0,107505444   | 0,332266 |
| O75352  | Mannose-P-dolichol utilization defect 1 protein OS=Homo sapiens OX=9606 GN=MPDU1 PE=1 SV=2                       | -0,089194944  | 0,332596 |
| O75348  | V-type proton ATPase subunit G 1 OS=Homo sapiens OX=9606 GN=ATP6V1G1 PE=1 SV=3                                   | -0,089104163  | 0,332229 |
| Q9NZI8  | #N/D                                                                                                             | -0,056415429  | 0,332095 |
| Q00059  | Transcription factor A, mitochondrial OS=Homo sapiens OX=9606 GN=TFAM PE=1 SV=1                                  | 0,147964768   | 0,331825 |
| Q9Y5L4  | Mitochondrial import inner membrane translocase subunit Tim13 OS=Homo sapiens OX=9606 GN=TIMM13 PE=1 SV=1        | -0,147839546  | 0,33153  |
| Q9UI09  | NADH dehydrogenase [ubiquinone] 1 alpha subcomplex subunit 12 OS=Homo sapiens OX=9606 GN=NDUFA12 PE=1 SV=1       | -0,147741637  | 0,3313   |
| Q9H089  | Large subunit GTPase 1 homolog OS=Homo sapiens OX=9606 GN=LSG1 PE=1 SV=2                                         | 0,147532854   | 0,33081  |
| P11766  | Alcohol dehydrogenase class-3 OS=Homo sapiens OX=9606 GN=ADH5 PE=1 SV=4                                          | 0,044274201   | 0,330357 |
| O75688  | Protein phosphatase 1B OS=Homo sapiens OX=9606 GN=PPM1B PE=1 SV=1                                                | -0,137041244  | 0,330157 |
| Q15121  | Astrocytic phosphoprotein PEA-15 OS=Homo sapiens OX=9606 GN=PEA15 PE=1 SV=2                                      | -0,064079023  | 0,33007  |
| Q8WUUA2 | Peptidyl-prolyl cis-trans isomerase-like 4 OS=Homo sapiens OX=9606 GN=PPIL4 PE=1 SV=1                            | 0,147185034   | 0,329993 |
| P27361  | Mitogen-activated protein kinase 3 OS=Homo sapiens OX=9606 GN=MAPK3 PE=1 SV=4                                    | -0,047933678  | 0,329852 |
| Q9P2D3  | HEAT repeat-containing protein 5B OS=Homo sapiens OX=9606 GN=HEATR5B PE=1 SV=2                                   | -0,106489375  | 0,329276 |
| Q86X13  | Ankyrin repeat and LEM domain-containing protein 2 OS=Homo sapiens OX=9606 GN=ANKLE2 PE=1 SV=4                   | -0,063818428  | 0,328605 |
| P37108  | Signal recognition particle 14 kDa protein OS=Homo sapiens OX=9606 GN=SRP14 PE=1 SV=2                            | 0,077157488   | 0,328434 |
| Q9P0V9  | Septin-10 OS=Homo sapiens OX=9606 GN=SEPTIN10 PE=1 SV=2                                                          | -0,087859854  | 0,327199 |
| Q9UIY1  | Heat shock protein beta-8 OS=Homo sapiens OX=9606 GN=HSPB8 PE=1 SV=1                                             | 0,087748799   | 0,327151 |
| Q724F1  | Low-density lipoprotein receptor-related protein 10 OS=Homo sapiens OX=9606 GN=LRP10 PE=1 SV=2                   | -0,148960874  | 0,326537 |
| Q9H7Z6  | Histone acetyltransferase KAT8 OS=Homo sapiens OX=9606 GN=KAT8 PE=1 SV=2                                         | 0,145696178   | 0,326495 |
| O60488  | Long-chain-fatty-acid-CoA ligase 4 OS=Homo sapiens OX=9606 GN=ACSL4 PE=1 SV=2                                    | 0,055284018   | 0,326167 |
| Q14155  | Rho guanine nucleotide exchange factor 7 OS=Homo sapiens OX=9606 GN=ARHGEF7 PE=1 SV=2                            | 0,076355005   | 0,32472  |
| Q9UBB4  | Ataxin-10 OS=Homo sapiens OX=9606 GN=ATXN10 PE=1 SV=1                                                            | -0,0471139565 | 0,323876 |
| Q8WUD1  | Ras-related protein Rab-2B OS=Homo sapiens OX=9606 GN=RAB2B PE=1 SV=1                                            | -0,062883828  | 0,323357 |
| Q12797  | Aspartyl/asparaginyl beta-hydroxylase OS=Homo sapiens OX=9606 GN=ASPH PE=1 SV=3                                  | 0,038012729   | 0,322494 |
| Q6GMV3  | Putative peptidyl-tRNA hydrolase PTRHD1 OS=Homo sapiens OX=9606 GN=PTRHD1 PE=1 SV=1                              | -0,14389282   | 0,322661 |
| Q9B0B6  | Vitamin K epoxide reductase complex subunit 1 OS=Homo sapiens OX=9606 GN=VKORC1 PE=1 SV=1                        | 0,104153934   | 0,321512 |
| P62847  | 40S ribosomal protein S24 OS=Homo sapiens OX=9606 GN=RPS24 PE=1 SV=1                                             | -0,075614014  | 0,321295 |
| O75506  | Heat shock factor-binding protein 1 OS=Homo sapiens OX=9606 GN=HSBP1 PE=1 SV=1                                   | -0,086363057  | 0,321162 |
| Q9NVL9  | Tropomodulin-3 OS=Homo sapiens OX=9606 GN=TMOD3 PE=1 SV=1                                                        | 0,041596997   | 0,320941 |
| Q13445  | Transmembrane emp24 domain-containing protein 1 OS=Homo sapiens OX=9606 GN=TMED1 PE=1 SV=1                       | -0,103919368  | 0,320733 |
| Q99729  | Heterogeneous nuclear ribonucleoprotein A/B OS=Homo sapiens OX=9606 GN=HNRNPAB PE=1 SV=2                         | 0,067938378   | 0,320347 |
| Q8TDJ6  | DmX-like protein 2 OS=Homo sapiens OX=9606 GN=DMXL2 PE=1 SV=2                                                    | -0,228716288  | 0,320313 |
| Q9Y3Q8  | TSC22 domain family protein 4 OS=Homo sapiens OX=9606 GN=TSC22D4 PE=1 SV=2                                       | 0,143039834   | 0,320259 |
| P51784  | Ubiquitin carboxyl-terminal hydrolase 11 OS=Homo sapiens OX=9606 GN=USP11 PE=1 SV=3                              | 0,103744272   | 0,320152 |
| Q9BTY7  | Protein HGH1 homolog OS=Homo sapiens OX=9606 GN=HGH1 PE=1 SV=1                                                   | 0,140198914   | 0,319143 |
| Q9NSY0  | Nuclear receptor-binding protein 2 OS=Homo sapiens OX=9606 GN=NRBP2 PE=1 SV=2                                    | 0,089950115   | 0,31883  |
| Q965T2  | Protein IWS1 homolog OS=Homo sapiens OX=9606 GN=IWS1 PE=1 SV=2                                                   | -0,103287776  | 0,318638 |
| Q724G1  | COMM domain-containing protein 6 OS=Homo sapiens OX=9606 GN=COMM6D PE=1 SV=1                                     | 0,142292658   | 0,318506 |
| Q96R17  | Gamma-tubulin complex component 6 OS=Homo sapiens OX=9606 GN=TUBGCP6 PE=1 SV=3                                   | 0,318291295   | 0,3185   |
| P63220  | 40S ribosomal protein S21 OS=Homo sapiens OX=9606 GN=RPS21 PE=1 SV=1                                             | 0,057341766   | 0,316664 |
| Q12TAL8 | Glutamine-rich protein 1 OS=Homo sapiens OX=9606 GN=QRICH1 PE=1 SV=1                                             | -0,141505133  | 0,316659 |
| P04406  | Glyceraldehyde-3-phosphate dehydrogenase OS=Homo sapiens OX=9606 GN=GAPDH PE=1 SV=3                              | 0,030247318   | 0,315389 |
| O75400  | Pre-mRNA-processing factor 40 homolog A OS=Homo sapiens OX=9606 GN=PRP40A PE=1 SV=2                              | -0,074329312  | 0,31537  |
| P62736  | Actin, aortic smooth muscle OS=Homo sapiens OX=9606 GN=ACTA2 PE=1 SV=1                                           | 0,140942228   | 0,315338 |
| P24844  | Myosin regulatory light polypeptide 9 OS=Homo sapiens OX=9606 GN=MYL9 PE=1 SV=4                                  | 0,039528353   | 0,314869 |
| P36873  | Serine/threonine-protein phosphatase PP1-gamma catalytic subunit OS=Homo sapiens OX=9606 GN=PPP1CC PE=1 SV=1     | -0,102141709  | 0,314839 |
| Q7L7X3  | Serine/threonine-protein kinase TAO1 OS=Homo sapiens OX=9606 GN=TAOK1 PE=1 SV=1                                  | 0,084537076   | 0,313818 |
| Q9NYY8  | FAST kinase domain-containing protein 2, mitochondrial OS=Homo sapiens OX=9606 GN=FASTKD2 PE=1 SV=1              | -0,206387133  | 0,313445 |
| Q6XZF7  | Dynamin-binding protein OS=Homo sapiens OX=9606 GN=DNMBP PE=1 SV=1                                               | -0,140108079  | 0,313383 |
| P49840  | Glycogen synthase kinase-3 alpha OS=Homo sapiens OX=9606 GN=GSK3A PE=1 SV=2                                      | -0,084377823  | 0,313179 |
| P82094  | TATA element modulatory factor OS=Homo sapiens OX=9606 GN=TMF1 PE=1 SV=2                                         | 0,066355686   | 0,312237 |
| Q9UPN3  | Microtubule-actin cross-linking factor 1, isoforms 1/2/3/5 OS=Homo sapiens OX=9606 GN=MACF1 PE=1 SV=4            | 0,021474963   | 0,312024 |
| Q13336  | Urea transporter 1 OS=Homo sapiens OX=9606 GN=SLC14A1 PE=1 SV=2                                                  | 0,139225043   | 0,311313 |
| Q6YHU6  | Thyroid adenoma-associated protein OS=Homo sapiens OX=9606 GN=THADA PE=1 SV=1                                    | -0,0734417    | 0,311286 |
| Q12904  | Aminoacyl tRNA synthase complex-interacting multifunctional protein 1 OS=Homo sapiens OX=9606 GN=AIMP1 PE=1 SV=2 | 0,052829671   | 0,3104   |
| Q9Y263  | Phospholipase A-2-activating protein OS=Homo sapiens OX=9606 GN=PLAA PE=1 SV=2                                   | 0,036683449   | 0,310187 |
| Q9Y6R0  | Numb-like protein OS=Homo sapiens OX=9606 GN=NUMBL PE=1 SV=1                                                     | -0,22933951   | 0,309923 |
| P53680  | AP-2 complex subunit sigma OS=Homo sapiens OX=9606 GN=AP2S1 PE=1 SV=2                                            | -0,083500615  | 0,30966  |
| Q8YR5   | G-protein-signaling modulator 1 OS=Homo sapiens OX=9606 GN=GSPM1 PE=1 SV=2                                       | -0,13831544   | 0,309181 |
| P13798  | Acylamino-acid-releasing enzyme OS=Homo sapiens OX=9606 GN=APEH PE=1 SV=4                                        | -0,038841845  | 0,308904 |
| P00966  | Argininosuccinate synthase OS=Homo sapiens OX=9606 GN=ASS1 PE=1 SV=2                                             | -0,038803389  | 0,30857  |
| P54920  | Alpha-soluble NSF attachment protein OS=Homo sapiens OX=9606 GN=NAPA PE=1 SV=3                                   | 0,043234347   | 0,308533 |
| Q12772  | Sterol regulatory element-binding protein 2 OS=Homo sapiens OX=9606 GN=SREBF2 PE=1 SV=2                          | 0,473875629   | 0,308176 |
| Q43639  | Cytoplasmic protein NCK2 OS=Homo sapiens OX=9606 GN=NCK2 PE=1 SV=2                                               | -0,23889105   | 0,307768 |
| Q7RTV0  | PHD finger-like domain-containing protein 5A OS=Homo sapiens OX=9606 GN=PHF5A PE=1 SV=1                          | -0,072604278  | 0,307439 |
| P49366  | Deoxyhypusine synthase OS=Homo sapiens OX=9606 GN=DHPS PE=1 SV=1                                                 | -0,137495993  | 0,307261 |
| P36954  | DNA-directed RNA polymerase II subunit RPB9 OS=Homo sapiens OX=9606 GN=POLR2I PE=1 SV=1                          | 0,137460892   | 0,307179 |
| Q00688  | Peptidyl-prolyl cis-trans isomerase FKBP3 OS=Homo sapiens OX=9606 GN=FKBP3 PE=1 SV=1                             | 0,055757706   | 0,30715  |
| P30626  | Sorcin OS=Homo sapiens OX=9606 GN=SRI PE=1 SV=1                                                                  | 0,052264657   | 0,306787 |
| P83436  | Conserved oligomeric Golgi complex subunit 7 OS=Homo sapiens OX=9606 GN=COG7 PE=1 SV=1                           | -0,065118807  | 0,305921 |
| Q9H3P7  | Golgi resident protein GCP60 OS=Homo sapiens OX=9606 GN=ACBD3 PE=1 SV=4                                          | -0,041261554  | 0,305407 |
| Q14683  | Structural maintenance of chromosomes protein 1A OS=Homo sapiens OX=9606 GN=SMC1A PE=1 SV=2                      | 0,072161526   | 0,305487 |
| P20810  | Calpastatin OS=Homo sapiens OX=9606 GN=CAST PE=1 SV=4                                                            | 0,036136304   | 0,305143 |
| P52565  | Rho GDP-dissociation inhibitor 1 OS=Homo sapiens OX=9606 GN=ARHGDI1 PE=1 SV=3                                    | -0,041151941  | 0,304985 |
| Q07738  | Bisphosphoglycerate mutase OS=Homo sapiens OX=9606 GN=BPGM PE=1 SV=2                                             | -0,05537508   | 0,304858 |
| Q15164  | Transcription intermediary factor 1-alpha OS=Homo sapiens OX=9606 GN=TRIM24 PE=1 SV=3                            | -0,173070245  | 0,303893 |
| Q16082  | Heat shock protein beta-2 OS=Homo sapiens OX=9606 GN=HSPB2 PE=1 SV=2                                             | -0,13571382   | 0,303088 |
| Q8N3D4  | EH domain-binding protein 1-like protein 1 OS=Homo sapiens OX=9606 GN=EHPB1L1 PE=1 SV=2                          | 0,044244917   | 0,302238 |
| Q16832  | Discoidin domain-containing receptor 2 OS=Homo sapiens OX=9606 GN=DDR2 PE=1 SV=2                                 | 0,081585222   | 0,301993 |
| P12236  | ADP/ATP translocase 3 OS=Homo sapiens OX=9606 GN=SLC25A6 PE=1 SV=4                                               | 0,03387848    | 0,30177  |
| Q9BVA1  | Tubulin beta-2B chain OS=Homo sapiens OX=9606 GN=TUBB2B PE=1 SV=1                                                | -0,088201731  | 0,301556 |
| P06132  | Uroporphyrinogen decarboxylase OS=Homo sapiens OX=9606 GN=UROD PE=1 SV=2                                         | -0,048584726  | 0,301276 |
| P30419  | Glycylpeptide N-tetradecanoyltransferase 1 OS=Homo sapiens OX=9606 GN=NMT1 PE=1 SV=2                             | -0,051396181  | 0,301246 |
| Q9UI15  | Transgelin-3 OS=Homo sapiens OX=9606 GN=TAGLN3 PE=1 SV=2                                                         | 0,081174855   | 0,300354 |
| O15344  | E3 ubiquitin-protein ligase Midline-1 OS=Homo sapiens OX=9606 GN=MID1 PE=1 SV=1                                  | 0,058746996   | 0,300281 |

|        |                                                                                                                              |              |          |
|--------|------------------------------------------------------------------------------------------------------------------------------|--------------|----------|
| Q9NSC5 | Homer protein homolog 3 OS=Homo sapiens OX=9606 GN=HOMER3 PE=1 SV=2                                                          | 0,070883298  | 0,299554 |
| P50914 | 60S ribosomal protein L14 OS=Homo sapiens OX=9606 GN=RPL14 PE=1 SV=4                                                         | -0,097457342 | 0,299366 |
| Q14980 | Nuclear mitotic apparatus protein 1 OS=Homo sapiens OX=9606 GN=NUMA1 PE=1 SV=2                                               | 0,031241078  | 0,298739 |
| Q13435 | Splicing factor 3B subunit 2 OS=Homo sapiens OX=9606 GN=SF3B2 PE=1 SV=2                                                      | -0,037545298 | 0,297686 |
| Q9BXRO | Queuine tRNA-ribosyltransferase catalytic subunit 1 OS=Homo sapiens OX=9606 GN=QTRT1 PE=1 SV=3                               | -0,133310117 | 0,297463 |
| P55290 | Cadherin-13 OS=Homo sapiens OX=9606 GN=CDH13 PE=1 SV=1                                                                       | 0,070419362  | 0,297433 |
| Q03701 | CCAAT/enhancer-binding protein zeta OS=Homo sapiens OX=9606 GN=CEBPZ PE=1 SV=3                                               | -0,133185682 | 0,297172 |
| Q96GA7 | Serine dehydratase-like OS=Homo sapiens OX=9606 GN=SDSL PE=1 SV=1                                                            | -0,080321061 | 0,296947 |
| O94966 | Ubiquitin carboxyl-terminal hydrolase 19 OS=Homo sapiens OX=9606 GN=USP19 PE=1 SV=2                                          | -0,046391645 | 0,296741 |
| Q7ZSR6 | Amyloid beta A4 precursor protein-binding family B member 1-interacting protein OS=Homo sapiens OX=9606 GN=APBB1IP PE=1 SV=1 | 0,318485376  | 0,296178 |
| Q9H008 | Phosphorylase phosphohistidine inorganic pyrophosphate phosphatase OS=Homo sapiens OX=9606 GN=LHPP PE=1 SV=2                 | -0,132718957 | 0,296081 |
| P78504 | Protein jagged-1 OS=Homo sapiens OX=9606 GN=JAG1 PE=1 SV=3                                                                   | -0,132435582 | 0,295418 |
| Q02809 | Procollagen-lysine,2-oxoglutarate 5-dioxygenase 1 OS=Homo sapiens OX=9606 GN=PLOD1 PE=1 SV=2                                 | -0,026548554 | 0,295404 |
| Q96EY8 | Corrinoid adenosyltransferase OS=Homo sapiens OX=9606 GN=MMAB PE=1 SV=1                                                      | 0,108874695  | 0,293285 |
| O60869 | Endothelial differentiation-related factor 1 OS=Homo sapiens OX=9606 GN=EDF1 PE=1 SV=1                                       | 0,062596033  | 0,293094 |
| Q12965 | Unconventional myosin-Ie OS=Homo sapiens OX=9606 GN=MYO1E PE=1 SV=2                                                          | -0,032151748 | 0,292959 |
| O43719 | HIV Tat-specific factor 1 OS=Homo sapiens OX=9606 GN=HTATSF1 PE=1 SV=1                                                       | -0,095385902 | 0,292552 |
| P36969 | Phospholipid hydroperoxide glutathione peroxidase OS=Homo sapiens OX=9606 GN=GPX4 PE=1 SV=3                                  | -0,130836015 | 0,291679 |
| Q15714 | TSC22 domain family protein 1 OS=Homo sapiens OX=9606 GN=TSC22D1 PE=1 SV=3                                                   | 0,037461812  | 0,290592 |
| P56211 | cAMP-regulated phosphoprotein 19 OS=Homo sapiens OX=9606 GN=ARPP19 PE=1 SV=2                                                 | 0,094750234  | 0,290464 |
| P22061 | Protein-L-isoaspartate(D-aspartate) O-methyltransferase OS=Homo sapiens OX=9606 GN=PCMT1 PE=1 SV=4                           | 0,044610115  | 0,290111 |
| O43852 | Calumenin OS=Homo sapiens OX=9606 GN=CALU PE=1 SV=2                                                                          | -0,031826421 | 0,289738 |
| P33991 | DNA replication licensing factor MCM4 OS=Homo sapiens OX=9606 GN=MCM4 PE=1 SV=5                                              | -0,046859998 | 0,289678 |
| Q9H777 | Zinc phosphodiesterase ELAC protein 1 OS=Homo sapiens OX=9606 GN=ELAC1 PE=1 SV=2                                             | 0,173144974  | 0,288838 |
| O43488 | Aflatoxin B1 aldehyde reductase member 2 OS=Homo sapiens OX=9606 GN=AKR7A2 PE=1 SV=3                                         | -0,049392816 | 0,288521 |
| Q5BJH2 | Transmembrane protein 128 OS=Homo sapiens OX=9606 GN=TMEM128 PE=1 SV=2                                                       | -0,128798141 | 0,286919 |
| P47755 | F-actin-capping protein subunit alpha-2 OS=Homo sapiens OX=9606 GN=CAPZA2 PE=1 SV=3                                          | 0,042158936  | 0,286788 |
| Q92621 | Nuclear pore complex protein Nup205 OS=Homo sapiens OX=9606 GN=NUP205 PE=1 SV=3                                              | -0,04636344  | 0,286351 |
| P30622 | CAP-Gly domain-containing linker protein 1 OS=Homo sapiens OX=9606 GN=CLIP1 PE=1 SV=2                                        | -0,029981027 | 0,285666 |
| P36871 | Phosphoglucomutase-1 OS=Homo sapiens OX=9606 GN=PGM1 PE=1 SV=3                                                               | -0,028549141 | 0,283729 |
| Q96AN5 | Transmembrane protein 143 OS=Homo sapiens OX=9606 GN=TMEM143 PE=2 SV=1                                                       | 0,127382321  | 0,283614 |
| Q03405 | Urokinase plasminogen activator surface receptor OS=Homo sapiens OX=9606 GN=PLAUR PE=1 SV=1                                  | -0,067124573 | 0,282429 |
| Q13444 | Disintegrin and metalloproteinase domain-containing protein 15 OS=Homo sapiens OX=9606 GN=ADAM15 PE=1 SV=4                   | 0,126691176  | 0,282002 |
| O95479 | GDH/6PGL endoplasmic bifunctional protein OS=Homo sapiens OX=9606 GN=H6PD PE=1 SV=2                                          | 0,036899903  | 0,281689 |
| Q16763 | Ubiquitin-conjugating enzyme E2 S OS=Homo sapiens OX=9606 GN=UBE2S PE=1 SV=2                                                 | 0,119056431  | 0,281251 |
| P49821 | NADH dehydrogenase [ubiquinone] flavoprotein 1, mitochondrial OS=Homo sapiens OX=9606 GN=NDUFV1 PE=1 SV=4                    | 0,066811912  | 0,281011 |
| Q9H814 | Phosphorylated adapter RNA export protein OS=Homo sapiens OX=9606 GN=PHAX PE=1 SV=1                                          | 0,086675133  | 0,280849 |
| Q99622 | Protein C10 OS=Homo sapiens OX=9606 GN=C10orf57 PE=1 SV=1                                                                    | -0,060106441 | 0,280511 |
| P08631 | Tyrosine-protein kinase HCK OS=Homo sapiens OX=9606 GN=HCK PE=1 SV=5                                                         | -0,017404726 | 0,280201 |
| P40818 | Ubiquitin carboxyl-terminal hydrolase 8 OS=Homo sapiens OX=9606 GN=USP8 PE=1 SV=1                                            | 0,05997716   | 0,27986  |
| Q15126 | Phosphomevalonate kinase OS=Homo sapiens OX=9606 GN=PMVK PE=1 SV=3                                                           | -0,055030142 | 0,279761 |
| Q8NCM8 | Cytoplasmic dynein 2 heavy chain 1 OS=Homo sapiens OX=9606 GN=DYNC2H1 PE=1 SV=4                                              | 0,125724514  | 0,279747 |
| Q96Q11 | CCA TRNA nucleotidyltransferase 1, mitochondrial OS=Homo sapiens OX=9606 GN=TRNT1 PE=1 SV=2                                  | -0,091429733 | 0,279585 |
| Q9H773 | dCTP pyrophosphatase 1 OS=Homo sapiens OX=9606 GN=DCTPP1 PE=1 SV=1                                                           | 0,091360698  | 0,279359 |
| Q8IWE4 | DCN1-like protein 3 OS=Homo sapiens OX=9606 GN=DCUN1D3 PE=1 SV=1                                                             | -0,075819125 | 0,279063 |
| Q9H1H9 | Kinesin-like protein KIF13A OS=Homo sapiens OX=9606 GN=KIF13A PE=1 SV=2                                                      | -0,125146236 | 0,278399 |
| Q9NZQ7 | Programmed cell death 1 ligand 1 OS=Homo sapiens OX=9606 GN=CD274 PE=1 SV=1                                                  | 0,499618671  | 0,278289 |
| P17812 | CTP synthase 1 OS=Homo sapiens OX=9606 GN=CTPS1 PE=1 SV=2                                                                    | -0,030630582 | 0,277944 |
| Q8WU79 | Stromal membrane-associated protein 2 OS=Homo sapiens OX=9606 GN=SMAP2 PE=1 SV=1                                             | -0,090841914 | 0,277664 |
| P50750 | Cyclin-dependent kinase 9 OS=Homo sapiens OX=9606 GN=CDK9 PE=1 SV=3                                                          | 0,124619983  | 0,277172 |
| P03891 | NADH-ubiquinone oxidoreductase chain 2 OS=Homo sapiens OX=9606 GN=MT-ND2 PE=1 SV=2                                           | 0,124153627  | 0,276085 |
| Q6YN16 | Hydroxysteroid dehydrogenase-like protein 2 OS=Homo sapiens OX=9606 GN=HSDL2 PE=1 SV=1                                       | 0,042605447  | 0,276013 |
| Q9Y5A7 | NEEDS ultimate buster 1 OS=Homo sapiens OX=9606 GN=NUB1 PE=1 SV=2                                                            | -0,090304953 | 0,27591  |
| Q6N212 | Caveolae-associated protein 1 OS=Homo sapiens OX=9606 GN=CAVIN1 PE=1 SV=1                                                    | 0,033924777  | 0,275909 |
| Q9BYV8 | Centrosomal protein of 41 kDa OS=Homo sapiens OX=9606 GN=CEP41 PE=1 SV=1                                                     | -0,124068813 | 0,275887 |
| O96019 | Actin-like protein 6A OS=Homo sapiens OX=9606 GN=ACTL6A PE=1 SV=1                                                            | 0,050492427  | 0,275835 |
| Q5M1Z7 | Serine/threonine-protein phosphatase 4 regulatory subunit 3B OS=Homo sapiens OX=9606 GN=PPP4R3B PE=1 SV=2                    | -0,252234243 | 0,275243 |
| Q14653 | Golgi SNAP receptor complex member 2 OS=Homo sapiens OX=9606 GN=GOSR2 PE=1 SV=2                                              | -0,074520569 | 0,273931 |
| Q9NY33 | Dipeptidyl peptidase 3 OS=Homo sapiens OX=9606 GN=PPP3 PE=1 SV=2                                                             | -0,030971446 | 0,273757 |
| Q9NRX1 | RNA-binding protein PNO1 OS=Homo sapiens OX=9606 GN=PNO1 PE=1 SV=1                                                           | 0,08960933   | 0,27364  |
| Q92805 | Golgin subfamily A member 1 OS=Homo sapiens OX=9606 GN=GOLGA1 PE=1 SV=3                                                      | 0,089494638  | 0,273266 |
| Q9NR46 | Endophilin-B2 OS=Homo sapiens OX=9606 GN=SH3GLB2 PE=1 SV=1                                                                   | 0,089439439  | 0,273086 |
| P08865 | 40S ribosomal protein SA OS=Homo sapiens OX=9606 GN=RPSA PE=1 SV=4                                                           | 0,03355294   | 0,272637 |
| Q96EK9 | Protein KTI12 homolog OS=Homo sapiens OX=9606 GN=KTI12 PE=1 SV=1                                                             | -0,124248627 | 0,271542 |
| Q16647 | Prostacyclin synthase OS=Homo sapiens OX=9606 GN=PTGIS PE=1 SV=1                                                             | -0,064642307 | 0,271193 |
| P48556 | 26S proteasome non-ATPase regulatory subunit 8 OS=Homo sapiens OX=9606 GN=PSMD8 PE=1 SV=2                                    | -0,046638599 | 0,271156 |
| P17301 | Integrin alpha-2 OS=Homo sapiens OX=9606 GN=ITGA2 PE=1 SV=1                                                                  | 0,122017316  | 0,271109 |
| Q9NP16 | RNA-decapping enzyme 1A OS=Homo sapiens OX=9606 GN=DCP1A PE=1 SV=3                                                           | 0,121845573  | 0,270709 |
| Q5T2E6 | Armadillo-like helical domain-containing protein 3 OS=Homo sapiens OX=9606 GN=ARMH3 PE=1 SV=1                                | 0,073639317  | 0,270454 |
| Q05519 | Serine/arginine-rich splicing factor 11 OS=Homo sapiens OX=9606 GN=SRSF11 PE=1 SV=1                                          | -0,064448014 | 0,270316 |
| Q0VG06 | Fanconi anemia core complex-associated protein 100 OS=Homo sapiens OX=9606 GN=FAAP100 PE=1 SV=3                              | 0,12117268   | 0,269143 |
| P50416 | Carnitine O-palmitoyltransferase 1, liver isoform OS=Homo sapiens OX=9606 GN=CPT1A PE=1 SV=2                                 | 0,04370821   | 0,268654 |
| P05556 | Integrin beta-1 OS=Homo sapiens OX=9606 GN=ITGB1 PE=1 SV=2                                                                   | 0,024733262  | 0,268642 |
| Q9H788 | SH2 domain-containing protein 4A OS=Homo sapiens OX=9606 GN=SH2D4A PE=1 SV=1                                                 | 0,064031472  | 0,268437 |
| Q8IU85 | Calcium/calmodulin-dependent protein kinase type 1D OS=Homo sapiens OX=9606 GN=CAMK1D PE=1 SV=1                              | -0,087755596 | 0,2676   |
| P31930 | Cytochrome b-c1 complex subunit 1, mitochondrial OS=Homo sapiens OX=9606 GN=LUCRC1 PE=1 SV=3                                 | -0,034984831 | 0,265906 |
| Q75915 | PRA1 family protein 3 OS=Homo sapiens OX=9606 GN=ARL6IP5 PE=1 SV=1                                                           | 0,048782339  | 0,265768 |
| O00762 | Ubiquitin-conjugating enzyme E2 C OS=Homo sapiens OX=9606 GN=UBE2C PE=1 SV=1                                                 | -0,087010101 | 0,265175 |
| Q9UMX0 | Ubiquitin-1 OS=Homo sapiens OX=9606 GN=UBQLN1 PE=1 SV=2                                                                      | 0,041052475  | 0,26516  |
| Q9Y6A9 | Signal peptidase complex subunit 1 OS=Homo sapiens OX=9606 GN=SPCS1 PE=1 SV=4                                                | 0,119426133  | 0,26508  |
| P28340 | DNA polymerase delta catalytic subunit OS=Homo sapiens OX=9606 GN=POLD1 PE=1 SV=2                                            | -0,086586264 | 0,264928 |
| Q14254 | Flotillin-2 OS=Homo sapiens OX=9606 GN=FLOT2 PE=1 SV=2                                                                       | 0,045595089  | 0,264616 |
| P49755 | Transmembrane emp24 domain-containing protein 10 OS=Homo sapiens OX=9606 GN=TMED10 PE=1 SV=2                                 | 0,052246096  | 0,264523 |
| O75489 | NADH dehydrogenase [ubiquinone] iron-sulfur protein 3, mitochondrial OS=Homo sapiens OX=9606 GN=NDUFS3 PE=1 SV=1             | -0,063116955 | 0,264318 |
| P84098 | 60S ribosomal protein L19 OS=Homo sapiens OX=9606 GN=RPL19 PE=1 SV=1                                                         | 0,056764429  | 0,263738 |
| P42166 | Lamina-associated polypeptide 2, isoform alpha OS=Homo sapiens OX=9606 GN=TMPO PE=1 SV=2                                     | 0,045448528  | 0,263699 |
| O43731 | ER lumen protein-retaining receptor 3 OS=Homo sapiens OX=9606 GN=KDELR3 PE=2 SV=1                                            | 0,118446219  | 0,262802 |
| Q75438 | NADH dehydrogenase [ubiquinone] 1 beta subcomplex subunit 1 OS=Homo sapiens OX=9606 GN=NDUFB1 PE=1 SV=1                      | -0,118388327 | 0,262668 |
| Q9NVD7 | Alpha-parvin OS=Homo sapiens OX=9606 GN=PARVA PE=1 SV=1                                                                      | 0,045231397  | 0,262342 |
| Q9Y2D5 | A-kinase anchor protein 2 OS=Homo sapiens OX=9606 GN=AKAP2 PE=1 SV=3                                                         | -0,028351123 | 0,262333 |
| P40938 | Replication factor C subunit 3 OS=Homo sapiens OX=9606 GN=RFC3 PE=1 SV=2                                                     | -0,118198262 | 0,262226 |
| Q9UBL3 | Set1/Ash2 histone methyltransferase complex subunit ASH2 OS=Homo sapiens OX=9606 GN=ASH2L PE=1 SV=1                          | 0,062606043  | 0,26202  |
| O60506 | Heterogeneous nuclear ribonucleoprotein Q OS=Homo sapiens OX=9606 GN=SYNCRIP PE=1 SV=2                                       | -0,032329047 | 0,261908 |
| Q13617 | Cullin-2 OS=Homo sapiens OX=9606 GN=CUL2 PE=1 SV=2                                                                           | 0,040530536  | 0,261526 |
| Q5JTJ3 | Cytochrome c oxidase assembly factor 6 homolog OS=Homo sapiens OX=9606 GN=COA6 PE=1 SV=1                                     | 0,117765231  | 0,261122 |
| Q60228 | Eukaryotic translation initiation factor 3 subunit E OS=Homo sapiens OX=9606 GN=EIF3E PE=1 SV=1                              | -0,030437968 | 0,261104 |
| Q9H7C4 | Syncoilin OS=Homo sapiens OX=9606 GN=SYNC PE=1 SV=3                                                                          | 0,04038111   | 0,260487 |
| P11279 | Lysosome-associated membrane glycoprotein 1 OS=Homo sapiens OX=9606 GN=LAMP1 PE=1 SV=3                                       | -0,056065407 | 0,260247 |

|            |                                                                                                                                  |              |          |
|------------|----------------------------------------------------------------------------------------------------------------------------------|--------------|----------|
| Q6ZRP7     | Sulfhydryl oxidase 2 OS=Homo sapiens OX=9606 GN=QSOX2 PE=1 SV=3                                                                  | -0,11727846  | 0,260089 |
| P19634     | Sodium/hydrogen exchanger 1 OS=Homo sapiens OX=9606 GN=SLC9A1 PE=1 SV=2                                                          | -0,116293399 | 0,257802 |
| P48060     | Gioma pathogenesis-related protein 1 OS=Homo sapiens OX=9606 GN=GLIPR1 PE=1 SV=3                                                 | -0,084722634 | 0,257748 |
| Q8IU7      | Armadiello repeat-containing protein 8 OS=Homo sapiens OX=9606 GN=ARMC8 PE=1 SV=2                                                | -0,116046855 | 0,257229 |
| P43487     | Ran-specific GTPase-activating protein OS=Homo sapiens OX=9606 GN=RANBP1 PE=1 SV=1                                               | 0,050900289  | 0,257198 |
| P82932     | 28S ribosomal protein S6, mitochondrial OS=Homo sapiens OX=9606 GN=MRPS6 PE=1 SV=3                                               | -0,084414995 | 0,256751 |
| P55011     | Solute carrier family 12 member 2 OS=Homo sapiens OX=9606 GN=SLC12A2 PE=1 SV=1                                                   | 0,084395685  | 0,256689 |
| A8K2U0     | Alpha-2-macroglobulin-like protein 1 OS=Homo sapiens OX=9606 GN=A2ML1 PE=1 SV=3                                                  | -0,115808754 | 0,256676 |
| Q15642     | Cdc42-interacting protein 4 OS=Homo sapiens OX=9606 GN=TRIP10 PE=1 SV=3                                                          | 0,070114123  | 0,256601 |
| P62280     | 40S ribosomal protein S11 OS=Homo sapiens OX=9606 GN=RPS11 PE=1 SV=3                                                             | -0,037994358 | 0,256298 |
| O75083     | WD repeat-containing protein 1 OS=Homo sapiens OX=9606 GN=WDR1 PE=1 SV=4                                                         | -0,024492418 | 0,255915 |
| P53004     | Biliverdin reductase A OS=Homo sapiens OX=9606 GN=BLVRA PE=1 SV=2                                                                | 0,041767577  | 0,255282 |
| Q9NP72     | Ras-related protein Rab-18 OS=Homo sapiens OX=9606 GN=RAB18 PE=1 SV=1                                                            | 0,047078714  | 0,255788 |
| Q9NRF9     | DNA polymerase epsilon subunit 3 OS=Homo sapiens OX=9606 GN=POLE3 PE=1 SV=1                                                      | -0,115421994 | 0,255779 |
| Q9NTK5     | Obg-like ATPase 1 OS=Homo sapiens OX=9606 GN=OLA1 PE=1 SV=2                                                                      | 0,033686812  | 0,255282 |
| Q8IWX8     | Calcium homeostasis endoplasmic reticulum protein OS=Homo sapiens OX=9606 GN=CHERP PE=1 SV=3                                     | -0,115125349 | 0,255033 |
| P60903     | Protein S100-A10 OS=Homo sapiens OX=9606 GN=S100A10 PE=1 SV=2                                                                    | 0,050501588  | 0,255033 |
| P23381     | Tryptophan-tRNA ligase, cytoplasmic OS=Homo sapiens OX=9606 GN=WARS PE=1 SV=2                                                    | -0,02969635  | 0,254252 |
| Q9NQT8     | Kinesin-like protein KIF13B OS=Homo sapiens OX=9606 GN=KIF13B PE=1 SV=2                                                          | 0,015978856  | 0,253849 |
| Q96TA1     | Niban-like protein 1 OS=Homo sapiens OX=9606 GN=FAM129B PE=1 SV=3                                                                | 0,02270591   | 0,253792 |
| P06730     | Eukaryotic translation initiation factor 4E OS=Homo sapiens OX=9606 GN=EIF4E PE=1 SV=2                                           | 0,050157621  | 0,253167 |
| Q0QR29     | FBAR domain only protein 2 OS=Homo sapiens OX=9606 GN=FCHO2 PE=1 SV=2                                                            | 0,083067988  | 0,252339 |
| O60503     | Adenylate cyclase type 9 OS=Homo sapiens OX=9606 GN=ADCY9 PE=1 SV=4                                                              | -0,113915281 | 0,252283 |
| Q16222     | UDP-N-acetylhexosamine pyrophosphorylase OS=Homo sapiens OX=9606 GN=UAP1 PE=1 SV=3                                               | -0,026707933 | 0,252097 |
| Q15042     | Rab3 GTPase-activating protein catalytic subunit OS=Homo sapiens OX=9606 GN=RAB3GAP1 PE=1 SV=3                                   | 0,030211442  | 0,251343 |
| Q99627     | COP9 signalosome complex subunit 8 OS=Homo sapiens OX=9606 GN=COP58 PE=1 SV=1                                                    | 0,068629298  | 0,250791 |
| Q12788     | Transducin beta-like protein 3 OS=Homo sapiens OX=9606 GN=TL3 PE=1 SV=2                                                          | -0,082289636 | 0,249874 |
| Q6PD62     | RNA polymerase-associated protein CTR9 homolog OS=Homo sapiens OX=9606 GN=CTR9 PE=1 SV=1                                         | 0,096844075  | 0,249    |
| Q7RTPE     | [F-actin]-monooxygenase MICAL3 OS=Homo sapiens OX=9606 GN=MICAL3 PE=1 SV=2                                                       | -0,06811417  | 0,248779 |
| Q6ZS25     | #N/D                                                                                                                             | 0,027999307  | 0,248041 |
| O76074     | cGMP-specific 3',5'-cyclic phosphodiesterase OS=Homo sapiens OX=9606 GN=PDE5A PE=1 SV=2                                          | -0,111872983 | 0,24755  |
| Q12996     | Cleavage stimulation factor subunit 3 OS=Homo sapiens OX=9606 GN=CSTF3 PE=1 SV=1                                                 | 0,059151998  | 0,246551 |
| P30520     | Adenylosuccinate synthetase isozyme 2 OS=Homo sapiens OX=9606 GN=ADSS PE=1 SV=3                                                  | 0,036550204  | 0,245836 |
| O94851     | [F-actin]-monooxygenase MICAL2 OS=Homo sapiens OX=9606 GN=MICAL2 PE=1 SV=1                                                       | 0,032468819  | 0,245367 |
| Q9Y6E0     | Serine/threonine-protein kinase 24 OS=Homo sapiens OX=9606 GN=STK24 PE=1 SV=1                                                    | 0,053047456  | 0,245242 |
| P46940     | Ras GTPase-activating-like protein IQGAP1 OS=Homo sapiens OX=9606 GN=IQGAP1 PE=1 SV=1                                            | 0,013918065  | 0,245059 |
| Q9UI14     | Prenylated Rab acceptor protein 1 OS=Homo sapiens OX=9606 GN=RABAC1 PE=1 SV=1                                                    | -0,110748638 | 0,244946 |
| Q10UKG1    | DCC-interacting protein 13-alpha OS=Homo sapiens OX=9606 GN=APPL1 PE=1 SV=1                                                      | 0,06708908   | 0,244781 |
| Q8N129     | Protein canopy homolog 4 OS=Homo sapiens OX=9606 GN=CNPY4 PE=2 SV=1                                                              | 0,110423155  | 0,244193 |
| Q8TED1     | Probable glutathione peroxidase 8 OS=Homo sapiens OX=9606 GN=GPX8 PE=1 SV=2                                                      | 0,048429689  | 0,243821 |
| Q9NRL3     | Striatin-4 OS=Homo sapiens OX=9606 GN=STRN4 PE=1 SV=2                                                                            | -0,080390976 | 0,243746 |
| P02794     | Ferritin heavy chain OS=Homo sapiens OX=9606 GN=FTH1 PE=1 SV=2                                                                   | 0,066800679  | 0,243658 |
| Q9P287     | BRCA2 and CDKN1A-interacting protein OS=Homo sapiens OX=9606 GN=BCCIP PE=1 SV=1                                                  | -0,110041811 | 0,24331  |
| P23142     | Fibulin-1 OS=Homo sapiens OX=9606 GN=FBLN1 PE=1 SV=4                                                                             | 0,033377376  | 0,243182 |
| P78362     | #N/D                                                                                                                             | -0,114720685 | 0,242644 |
| Q8WUW1     | Protein BRICK1 OS=Homo sapiens OX=9606 GN=BRK1 PE=1 SV=1                                                                         | -0,052444431 | 0,242257 |
| Q16658     | Fascin OS=Homo sapiens OX=9606 GN=FSCN1 PE=1 SV=3                                                                                | -0,023258221 | 0,242067 |
| P41091     | Eukaryotic translation initiation factor 2 subunit 3 OS=Homo sapiens OX=9606 GN=EIF2S3 PE=1 SV=3                                 | -0,026942697 | 0,242024 |
| P49721     | Proteasome subunit beta type-2 OS=Homo sapiens OX=9606 GN=PSMB2 PE=1 SV=1                                                        | -0,037644086 | 0,241552 |
| Q9Y3B2     | Exosome complex component CSL4 OS=Homo sapiens OX=9606 GN=EXOSC1 PE=1 SV=1                                                       | -0,079593466 | 0,241176 |
| Q92541     | RNA polymerase-associated protein RTF1 homolog OS=Homo sapiens OX=9606 GN=RTF1 PE=1 SV=4                                         | -0,051388695 | 0,240774 |
| Q92882     | Osteoclast-stimulating factor 1 OS=Homo sapiens OX=9606 GN=OSTF1 PE=1 SV=2                                                       | 0,057759158  | 0,240346 |
| Q16610     | Extracellular matrix protein 1 OS=Homo sapiens OX=9606 GN=ECM1 PE=1 SV=2                                                         | -0,108665784 | 0,240127 |
| Q9P2K8     | eIF-2-alpha kinase GCN2 OS=Homo sapiens OX=9606 GN=EIF2AK4 PE=1 SV=3                                                             | 0,108662812  | 0,24012  |
| Q13257     | Mitotic spindle assembly checkpoint protein MAD2A OS=Homo sapiens OX=9606 GN=MAD2L1 PE=1 SV=1                                    | 0,108436624  | 0,239597 |
| P29401     | Transketolase OS=Homo sapiens OX=9606 GN=TKT PE=1 SV=3                                                                           | -0,020853995 | 0,239404 |
| Q96E15     | Transcription elongation factor A protein-like 4 OS=Homo sapiens OX=9606 GN=TCEAL4 PE=1 SV=2                                     | -0,108327092 | 0,239344 |
| Q72422     | SUZ domain-containing protein 1 OS=Homo sapiens OX=9606 GN=SZRD1 PE=1 SV=1                                                       | -0,108193721 | 0,239036 |
| Q96920     | FAST kinase domain-containing protein 4 OS=Homo sapiens OX=9606 GN=TBRG4 PE=1 SV=1                                               | -0,078903664 | 0,238956 |
| Q13449     | Limbic system-associated membrane protein OS=Homo sapiens OX=9606 GN=LSAMP PE=1 SV=2                                             | 0,078577891  | 0,237909 |
| Q8IWW8     | E3 ubiquitin-protein ligase UBR2 OS=Homo sapiens OX=9606 GN=UBR2 PE=1 SV=1                                                       | -0,095872214 | 0,236392 |
| Q13526     | Peptidyl-prolyl cis-trans isomerase NIMA-interacting 1 OS=Homo sapiens OX=9606 GN=PIN1 PE=1 SV=1                                 | 0,064891255  | 0,236235 |
| Q9UQN3     | Charged multivesicular body protein 2b OS=Homo sapiens OX=9606 GN=CHMP2B PE=1 SV=1                                               | -0,106823454 | 0,235869 |
| Q14318     | Peptidyl-prolyl cis-trans isomerase FKBP8 OS=Homo sapiens OX=9606 GN=FKBP8 PE=1 SV=2                                             | 0,038689766  | 0,235637 |
| P04732     | Metallothionein-1E OS=Homo sapiens OX=9606 GN=MT1E PE=1 SV=1                                                                     | 0,106717012  | 0,235623 |
| P56199     | Integrin alpha-1 OS=Homo sapiens OX=9606 GN=ITGA1 PE=1 SV=2                                                                      | -0,077864945 | 0,235617 |
| P62330     | ADP-ribosylation factor 6 OS=Homo sapiens OX=9606 GN=ARF6 PE=1 SV=2                                                              | 0,051031222  | 0,23528  |
| P09936     | Ubiquitin carboxyl-terminal hydrolase isozyme L1 OS=Homo sapiens OX=9606 GN=UCHL1 PE=1 SV=2                                      | -0,038592356 | 0,235002 |
| P60484     | Phosphatidylinositol 3,4,5-trisphosphate 3-phosphatase and dual-specificity protein phosphatase PTEN OS=Homo sapiens OX=9606 GN= | 0,106427939  | 0,234956 |
| Q8N3P4     | Vacuolar protein sorting-associated protein 8 homolog OS=Homo sapiens OX=9606 GN=VPS8 PE=1 SV=3                                  | 0,106329533  | 0,234728 |
| P61966     | AP-1 complex subunit sigma-1A OS=Homo sapiens OX=9606 GN=AP1S1 PE=1 SV=1                                                         | -0,05638696  | 0,23425  |
| Q9UJW0     | Dynactin subunit 4 OS=Homo sapiens OX=9606 GN=DCTN4 PE=1 SV=1                                                                    | -0,036541822 | 0,233979 |
| P15924     | Desmoplakin OS=Homo sapiens OX=9606 GN=DSP PE=1 SV=3                                                                             | 0,011433706  | 0,233734 |
| Q16644     | MAP kinase-activated protein kinase 3 OS=Homo sapiens OX=9606 GN=MAPKAPK3 PE=1 SV=1                                              | 0,102814635  | 0,233713 |
| Q13895     | Bystin OS=Homo sapiens OX=9606 GN=BYSL PE=1 SV=3                                                                                 | 0,077184104  | 0,233431 |
| Q9ULT8     | E3 ubiquitin-protein ligase HECTD1 OS=Homo sapiens OX=9606 GN=HECTD1 PE=1 SV=3                                                   | 0,03212626   | 0,23342  |
| Q9P059     | Transmembrane protein 14C OS=Homo sapiens OX=9606 GN=TMEM14C PE=1 SV=1                                                           | 0,105228019  | 0,232185 |
| Q17RY0     | #N/D                                                                                                                             | -0,108667734 | 0,231903 |
| Q53G59     | U4/U6.U5 tri-snRNP-associated protein 2 OS=Homo sapiens OX=9606 GN=USP39 PE=1 SV=2                                               | -0,05581908  | 0,231733 |
| 000401     | Neural Wiskott-Aldrich syndrome protein OS=Homo sapiens OX=9606 GN=WASL PE=1 SV=2                                                | 0,076559961  | 0,231429 |
| Q9UM00     | Calcium load-activated calcium channel OS=Homo sapiens OX=9606 GN=TMCO1 PE=1 SV=2                                                | 0,063562731  | 0,231085 |
| Q9NVH1     | DnaJ homolog subfamily C member 11 OS=Homo sapiens OX=9606 GN=DNAJC11 PE=1 SV=2                                                  | -0,055631997 | 0,230905 |
| P26358     | DNA (cytosine-5)-methyltransferase 1 OS=Homo sapiens OX=9606 GN=DNMT1 PE=1 SV=2                                                  | -0,045866653 | 0,230038 |
| Q9BZ25     | Apoptosis inhibitor 5 OS=Homo sapiens OX=9606 GN=API5 PE=1 SV=3                                                                  | -0,042634394 | 0,22999  |
| P84095     | Rho-related GTP-binding protein RhoG OS=Homo sapiens OX=9606 GN=RHO G PE=1 SV=1                                                  | -0,049953974 | 0,229978 |
| Q9NR56     | Muscleblind-like protein 1 OS=Homo sapiens OX=9606 GN=MBNL1 PE=1 SV=2                                                            | 0,045795334  | 0,229656 |
| P21912     | Succinate dehydrogenase [ubiquinone] iron-sulfur subunit, mitochondrial OS=Homo sapiens OX=9606 GN=SDHB PE=1 SV=3                | -0,039852145 | 0,229009 |
| Q9HBL0     | Tensin-1 OS=Homo sapiens OX=9606 GN=TNS1 PE=1 SV=2                                                                               | -0,018656736 | 0,228933 |
| Q9NQG5     | Regulation of nuclear pre-mRNA domain-containing protein 1B OS=Homo sapiens OX=9606 GN=RPRD1B PE=1 SV=1                          | -0,075736347 | 0,228789 |
| P62851     | 40S ribosomal protein S25 OS=Homo sapiens OX=9606 GN=RPS25 PE=1 SV=1                                                             | 0,075723435  | 0,228748 |
| Q5H9R7     | Serine/threonine-protein phosphatase 6 regulatory subunit 3 OS=Homo sapiens OX=9606 GN=PPP6R3 PE=1 SV=2                          | -0,045595711 | 0,228587 |
| Q9Y7B2     | Ribosome production factor 2 homolog OS=Homo sapiens OX=9606 GN=RPF2 PE=1 SV=2                                                   | -0,103590308 | 0,228408 |
| Q9Y2U8     | Inner nuclear membrane protein Man1 OS=Homo sapiens OX=9606 GN=LEM3 PE=1 SV=2                                                    | -0,130823539 | 0,228155 |
| Q8TB61     | Adenosine 3'-phospho 5'-phosphosulfate transporter 1 OS=Homo sapiens OX=9606 GN=SLC35B2 PE=1 SV=1                                | -0,054961008 | 0,227936 |
| A0A1B0GUX0 | Protein ATP6V1FNB OS=Homo sapiens OX=9606 GN=ATP6V1FNB PE=4 SV=1                                                                 | 0,329929651  | 0,227756 |
| Q14790     | Caspase-8 OS=Homo sapiens OX=9606 GN=CASP8 PE=1 SV=1                                                                             | -0,103313128 | 0,227768 |
| O15173     | Membrane-associated progesterone receptor component 2 OS=Homo sapiens OX=9606 GN=PGRMC2 PE=1 SV=1                                | 0,045419656  | 0,227644 |
| Q9HGK4     | Optic atrophy 3 protein OS=Homo sapiens OX=9606 GN=OPA3 PE=1 SV=1                                                                | -0,102973571 | 0,226986 |

|        |                                                                                                                               |              |          |
|--------|-------------------------------------------------------------------------------------------------------------------------------|--------------|----------|
| Q9H490 | Phosphatidylinositol glycan anchor biosynthesis class U protein OS=Homo sapiens OX=9606 GN=PIGU PE=1 SV=3                     | 0,102967598  | 0,226972 |
| O15228 | Dihydroxyacetone phosphate acyltransferase OS=Homo sapiens OX=9606 GN=GNPAT PE=1 SV=1                                         | 0,075133983  | 0,22686  |
| P35573 | Glycogen debranching enzyme OS=Homo sapiens OX=9606 GN=AGL PE=1 SV=3                                                          | 0,102803538  | 0,226594 |
| Q01628 | Interferon-induced transmembrane protein 3 OS=Homo sapiens OX=9606 GN=IFITM3 PE=1 SV=2                                        | -0,102640024 | 0,226217 |
| Q14764 | Major vault protein OS=Homo sapiens OX=9606 GN=MVP PE=1 SV=4                                                                  | 0,017759369  | 0,226074 |
| P13987 | CD59 glycoprotein OS=Homo sapiens OX=9606 GN=CD59 PE=1 SV=1                                                                   | 0,062220781  | 0,225895 |
| Q07812 | Apoptosis regulator BAX OS=Homo sapiens OX=9606 GN=BAX PE=1 SV=1                                                              | -0,045087981 | 0,22587  |
| Q96PC5 | Melanoma inhibitory activity protein 2 OS=Homo sapiens OX=9606 GN=MIA2 PE=1 SV=4                                              | -0,102340831 | 0,225528 |
| Q6V288 | Beta-1,3-glucosyltransferase OS=Homo sapiens OX=9606 GN=B3GLCT PE=1 SV=2                                                      | -0,102303913 | 0,225443 |
| P23528 | Cofilin-1 OS=Homo sapiens OX=9606 GN=CFL1 PE=1 SV=3                                                                           | 0,028999785  | 0,225328 |
| Q9P1T7 | MyoD family inhibitor domain-containing protein OS=Homo sapiens OX=9606 GN=MDFC PE=1 SV=2                                     | 0,102254085  | 0,225328 |
| P52815 | 39S ribosomal protein L12, mitochondrial OS=Homo sapiens OX=9606 GN=MRPL12 PE=1 SV=2                                          | -0,101956556 | 0,224642 |
| P61247 | 40S ribosomal protein S3a OS=Homo sapiens OX=9606 GN=RPS3A PE=1 SV=2                                                          | 0,025130467  | 0,224622 |
| P00846 | ATP synthase subunit a OS=Homo sapiens OX=9606 GN=MT-ATP6 PE=1 SV=1                                                           | -0,101891657 | 0,224493 |
| Q13017 | Rho GTPase-activating protein 5 OS=Homo sapiens OX=9606 GN=ARHGAP5 PE=1 SV=2                                                  | -0,061724017 | 0,223978 |
| Q14974 | Importin subunit beta-1 OS=Homo sapiens OX=9606 GN=KPMB1 PE=1 SV=2                                                            | 0,019009192  | 0,223633 |
| Q96PE2 | Rho guanine nucleotide exchange factor 17 OS=Homo sapiens OX=9606 GN=ARHGEF17 PE=1 SV=1                                       | -0,033418483 | 0,223344 |
| P49736 | DNA replication licensing factor MCM2 OS=Homo sapiens OX=9606 GN=MCM2 PE=1 SV=4                                               | 0,036726449  | 0,222873 |
| Q9IUK3 | Protein mono-ADP-ribosyltransferase PARP4 OS=Homo sapiens OX=9606 GN=PARP4 PE=1 SV=3                                          | 0,033311078  | 0,222578 |
| Q99650 | Oncostatin-M-specific receptor subunit beta OS=Homo sapiens OX=9606 GN=OSMR PE=1 SV=1                                         | 0,101015577  | 0,222476 |
| Q9BXV9 | EKC/KEOPS complex subunit GON7 OS=Homo sapiens OX=9606 GN=GON7 PE=1 SV=2                                                      | -0,100916791 | 0,222248 |
| P62191 | 26S proteasome regulatory subunit 4 OS=Homo sapiens OX=9606 GN=PSMC1 PE=1 SV=1                                                | 0,027708375  | 0,221942 |
| P18440 | Arylamine N-acetyltransferase 1 OS=Homo sapiens OX=9606 GN=NAT1 PE=1 SV=2                                                     | 0,100664188  | 0,221667 |
| P52732 | Kinesin-like protein KIF11 OS=Homo sapiens OX=9606 GN=KIF11 PE=1 SV=2                                                         | -0,100429379 | 0,221126 |
| P50213 | Isochorate dehydrogenase [NAD] subunit alpha, mitochondrial OS=Homo sapiens OX=9606 GN=IDH3A PE=1 SV=1                        | 0,041081535  | 0,221057 |
| Q9BWU0 | Kanadaplin OS=Homo sapiens OX=9606 GN=SLC4A1AP PE=1 SV=1                                                                      | -0,100334598 | 0,220908 |
| Q14118 | Dystroglycan OS=Homo sapiens OX=9606 GN=DAG1 PE=1 SV=2                                                                        | 0,044088114  | 0,220531 |
| Q9BX67 | Junctional adhesion molecule C OS=Homo sapiens OX=9606 GN=JAM3 PE=1 SV=1                                                      | 0,077029458  | 0,219686 |
| Q9NXW2 | DnaJ homolog subfamily B member 12 OS=Homo sapiens OX=9606 GN=DNAJB12 PE=1 SV=5                                               | -0,072743292 | 0,219221 |
| Q9V265 | RuvB-like 1 OS=Homo sapiens OX=9606 GN=RUVBL1 PE=1 SV=1                                                                       | 0,032807186  | 0,218986 |
| P49773 | Histidine triad nucleotide-binding protein 1 OS=Homo sapiens OX=9606 GN=HINT1 PE=1 SV=2                                       | 0,047677811  | 0,218821 |
| Q13177 | Serine/threonine-protein kinase PAK 2 OS=Homo sapiens OX=9606 GN=PAK2 PE=1 SV=3                                               | 0,025133169  | 0,218709 |
| T20742 | Pregnancy zone protein OS=Homo sapiens OX=9606 GN=PZP PE=1 SV=4                                                               | 0,099358976  | 0,218664 |
| Q15428 | Splicing factor 3A subunit 2 OS=Homo sapiens OX=9606 GN=SF3A2 PE=1 SV=2                                                       | 0,052610752  | 0,217571 |
| Q09161 | Nuclear cap-binding protein subunit 1 OS=Homo sapiens OX=9606 GN=NCBP1 PE=1 SV=1                                              | 0,035855015  | 0,217236 |
| Q9NZ56 | Formin-2 OS=Homo sapiens OX=9606 GN=FMN2 PE=1 SV=4                                                                            | -0,098683156 | 0,217111 |
| Q8TDN6 | Ribosome biogenesis protein BRX1 homolog OS=Homo sapiens OX=9606 GN=BRX1 PE=1 SV=2                                            | -0,072005373 | 0,216869 |
| Q9V5N5 | Methyltransferase N6AMT1 OS=Homo sapiens OX=9606 GN=N6AMT1 PE=1 SV=4                                                          | 0,068071862  | 0,21637  |
| Q865F2 | N-acetylgalactosaminyltransferase 7 OS=Homo sapiens OX=9606 GN=GALNT7 PE=1 SV=1                                               | 0,040242362  | 0,216247 |
| P13716 | Delta-aminolevulinic acid dehydratase OS=Homo sapiens OX=9606 GN=ALAD PE=1 SV=1                                               | -0,047053927 | 0,215774 |
| Q9NX40 | OCIA domain-containing protein 1 OS=Homo sapiens OX=9606 GN=OCIAD1 PE=1 SV=1                                                  | -0,039934374 | 0,214484 |
| Q9NSE4 | Isoleucine-tRNA ligase, mitochondrial OS=Homo sapiens OX=9606 GN=IARS2 PE=1 SV=2                                              | -0,027633559 | 0,214013 |
| P32119 | Peroxisome oxidin-2 OS=Homo sapiens OX=9606 GN=PRDX2 PE=1 SV=5                                                                | -0,033609146 | 0,213978 |
| O60725 | Protein-S-isoprenylcysteine O-methyltransferase OS=Homo sapiens OX=9606 GN=ICMT PE=1 SV=1                                     | 0,096999487  | 0,213242 |
| Q95084 | Serine protease 23 OS=Homo sapiens OX=9606 GN=PRSS23 PE=1 SV=1                                                                | -0,096995341 | 0,213232 |
| Q13505 | Metaxin-1 OS=Homo sapiens OX=9606 GN=MTX1 PE=1 SV=3                                                                           | -0,070760267 | 0,212904 |
| Q13148 | TAR DNA-binding protein 43 OS=Homo sapiens OX=9606 GN=TARDBP PE=1 SV=1                                                        | -0,037097977 | 0,212166 |
| Q9Y5A9 | YTH domain-containing family protein 2 OS=Homo sapiens OX=9606 GN=YTHDF2 PE=1 SV=2                                            | 0,046267074  | 0,211938 |
| O95299 | NADH dehydrogenase [ubiquinone] 1 alpha subcomplex subunit 10, mitochondrial OS=Homo sapiens OX=9606 GN=NDUFA10 PE=1 SV=5     | -0,058508227 | 0,211606 |
| Q75351 | Vacuolar protein sorting-associated protein 4B OS=Homo sapiens OX=9606 GN=VPS4B PE=1 SV=2                                     | 0,051227076  | 0,211494 |
| Q62M10 | Protein phosphatase 1 regulatory subunit 21 OS=Homo sapiens OX=9606 GN=PPP1R21 PE=1 SV=1                                      | 0,127507582  | 0,211078 |
| P08621 | U1 small nuclear ribonucleoprotein 70 kDa OS=Homo sapiens OX=9606 GN=SNRNP70 PE=1 SV=2                                        | -0,030365951 | 0,210886 |
| Q5VY58 | Terminal uridylyltransferase 7 OS=Homo sapiens OX=9606 GN=TUT7 PE=1 SV=1                                                      | 0,105662524  | 0,210267 |
| Q96Q42 | Alsin OS=Homo sapiens OX=9606 GN=ALS2 PE=1 SV=2                                                                               | -0,106259531 | 0,210109 |
| Q14141 | Septin-6 OS=Homo sapiens OX=9606 GN=SEPTIN6 PE=1 SV=4                                                                         | 0,050747989  | 0,209394 |
| Q15435 | Protein phosphatase 1 regulatory subunit 7 OS=Homo sapiens OX=9606 GN=PPP1R7 PE=1 SV=1                                        | -0,026977714 | 0,208606 |
| Q8IXT5 | RNA-binding protein 12B OS=Homo sapiens OX=9606 GN=RBM12B PE=1 SV=2                                                           | -0,098675777 | 0,208299 |
| O95999 | B-cell lymphoma/leukemia 10 OS=Homo sapiens OX=9606 GN=BCL10 PE=1 SV=1                                                        | 0,050475601  | 0,208202 |
| Q9HOA0 | RNA cytidine acetyltransferase OS=Homo sapiens OX=9606 GN=NAT10 PE=1 SV=2                                                     | 0,034450523  | 0,208185 |
| Q92922 | SWI/SNF complex subunit SMARCC1 OS=Homo sapiens OX=9606 GN=SMARCC1 PE=1 SV=3                                                  | -0,058960923 | 0,208167 |
| Q92503 | SEC14-like protein 1 OS=Homo sapiens OX=9606 GN=SEC14L1 PE=1 SV=2                                                             | 0,091781518  | 0,207365 |
| Q8NE35 | Cytoplasmic polyadenylation element-binding protein 3 OS=Homo sapiens OX=9606 GN=CPEB3 PE=1 SV=2                              | 0,067923235  | 0,207107 |
| Q96F24 | Nuclear receptor-binding factor 2 OS=Homo sapiens OX=9606 GN=NRBF2 PE=1 SV=1                                                  | -0,094238056 | 0,206907 |
| P48426 | Phosphatidylinositol 5-phosphate 4-kinase type-2 alpha OS=Homo sapiens OX=9606 GN=PIP4K2A PE=1 SV=2                           | -0,041473089 | 0,206638 |
| Q6UW02 | Cytochrome P450 20A1 OS=Homo sapiens OX=9606 GN=CYP20A1 PE=1 SV=1                                                             | -0,050079505 | 0,206468 |
| Q9NX14 | NADH dehydrogenase [ubiquinone] 1 beta subcomplex subunit 11, mitochondrial OS=Homo sapiens OX=9606 GN=NDUFB11 PE=1 SV=1      | 0,094040857  | 0,206455 |
| Q14152 | Eukaryotic translation initiation factor 3 subunit A OS=Homo sapiens OX=9606 GN=EIF3A PE=1 SV=1                               | 0,014295869  | 0,205399 |
| P35240 | Merlin OS=Homo sapiens OX=9606 GN=NF2 PE=1 SV=1                                                                               | 0,09357245   | 0,205381 |
| Q9UP78 | Zinc finger CCH domain-containing protein 4 OS=Homo sapiens OX=9606 GN=ZC3H4 PE=1 SV=3                                        | -0,093324904 | 0,204814 |
| Q9H0C8 | Integrin-linked kinase-associated serine/threonine phosphatase 2C OS=Homo sapiens OX=9606 GN=ILKAP PE=1 SV=1                  | -0,068080955 | 0,204397 |
| Q15904 | V-type proton ATPase subunit S1 OS=Homo sapiens OX=9606 GN=ATP6A1 PE=1 SV=2                                                   | -0,068054972 | 0,204315 |
| P18583 | Protein SON OS=Homo sapiens OX=9606 GN=SON PE=1 SV=4                                                                          | -0,049570367 | 0,204243 |
| P13984 | General transcription factor IIF subunit 2 OS=Homo sapiens OX=9606 GN=GTF2F2 PE=1 SV=2                                        | 0,092662247  | 0,203297 |
| P62333 | 26S proteasome regulatory subunit 10B OS=Homo sapiens OX=9606 GN=PSMC6 PE=1 SV=1                                              | -0,024758308 | 0,203143 |
| P55268 | Laminin subunit beta-2 OS=Homo sapiens OX=9606 GN=LAMB2 PE=1 SV=2                                                             | 0,024722823  | 0,202833 |
| Q96BN8 | Ubiquitin thioesterase otulin OS=Homo sapiens OX=9606 GN=OTULIN PE=1 SV=3                                                     | -0,067225574 | 0,201689 |
| Q12802 | A-kinase anchor protein 13 OS=Homo sapiens OX=9606 GN=AKAP13 PE=1 SV=2                                                        | -0,091835038 | 0,201403 |
| Q92692 | Nectin-2 OS=Homo sapiens OX=9606 GN=NECTIN2 PE=1 SV=1                                                                         | 0,055791629  | 0,201213 |
| Q43314 | Inositol hexakisphosphate and diphosphoinositol-pentakisphosphate kinase 2 OS=Homo sapiens OX=9606 GN=PIPK2 PE=1 SV=3         | -0,048837702 | 0,201045 |
| P35268 | 60S ribosomal protein L22 OS=Homo sapiens OX=9606 GN=RPL22 PE=1 SV=2                                                          | 0,04400977   | 0,200976 |
| O75964 | ATP synthase subunit g, mitochondrial OS=Homo sapiens OX=9606 GN=ATP5MG PE=1 SV=3                                             | 0,066913433  | 0,2007   |
| Q9BTE1 | Dynactin subunit 5 OS=Homo sapiens OX=9606 GN=DCTN5 PE=1 SV=1                                                                 | 0,055607801  | 0,200509 |
| P52895 | Aldo-keto reductase family 1 member C2 OS=Homo sapiens OX=9606 GN=AKR1C2 PE=1 SV=3                                            | -0,035130984 | 0,200228 |
| Q9V285 | Phenylalanine-tRNA ligase alpha subunit OS=Homo sapiens OX=9606 GN=FARSA PE=1 SV=3                                            | -0,025952143 | 0,200183 |
| O96G3  | SWI/SNF-related matrix-associated actin-dependent regulator of chromatin subfamily E member 1 OS=Homo sapiens OX=9606 GN=SMR1 | 0,048633096  | 0,200152 |
| Q4VC31 | Coiled-coil domain-containing protein 58 OS=Homo sapiens OX=9606 GN=CCDC58 PE=1 SV=1                                          | -0,091169203 | 0,199888 |
| Q8ND24 | RING finger protein 214 OS=Homo sapiens OX=9606 GN=RF214 PE=1 SV=2                                                            | 0,055139877  | 0,198727 |
| Q5JTH9 | RRP12-like protein OS=Homo sapiens OX=9606 GN=RRP12 PE=1 SV=2                                                                 | 0,034820208  | 0,198349 |
| O96007 | Molybdopterin synthase catalytic subunit OS=Homo sapiens OX=9606 GN=MOCS2 PE=1 SV=1                                           | 0,090445157  | 0,198224 |
| P13674 | Prolyl 4-hydroxylase subunit alpha-1 OS=Homo sapiens OX=9606 GN=P4HA1 PE=1 SV=2                                               | -0,022336421 | 0,198112 |
| P51153 | Ras-related protein Rab-13 OS=Homo sapiens OX=9606 GN=RAB13 PE=1 SV=1                                                         | -0,09009239  | 0,197418 |
| Q9V572 | Receptor-interacting serine/threonine-protein kinase 3 OS=Homo sapiens OX=9606 GN=RIPK3 PE=1 SV=2                             | -0,090032776 | 0,197281 |
| Q9H8Y8 | Golgi reassembly-stacking protein 2 OS=Homo sapiens OX=9606 GN=GORASP2 PE=1 SV=3                                              | 0,032733545  | 0,197181 |
| Q9BVK6 | Transmembrane emp24 domain-containing protein 9 OS=Homo sapiens OX=9606 GN=TMED9 PE=1 SV=2                                    | -0,047872177 | 0,196838 |
| P51148 | Ras-related protein Rab-5C OS=Homo sapiens OX=9606 GN=RAB5C PE=1 SV=2                                                         | 0,032585101  | 0,196233 |
| P60660 | Myosin light polypeptide 6 OS=Homo sapiens OX=9606 GN=MYL6 PE=1 SV=2                                                          | -0,027129186 | 0,194933 |
| O43924 | Retinal rod rhodopsin-sensitive cGMP 3',5'-cyclic phosphodiesterase subunit delta OS=Homo sapiens OX=9606 GN=PDE6D PE=1 SV=1  | -0,088772368 | 0,194402 |
| Q15007 | Pre-mRNA-splicing regulator WTAP OS=Homo sapiens OX=9606 GN=WTAP PE=1 SV=2                                                    | -0,0647943   | 0,194006 |

|        |                                                                                                                              |              |          |
|--------|------------------------------------------------------------------------------------------------------------------------------|--------------|----------|
| Q6UWEO | E3 ubiquitin-protein ligase LRSAM1 OS=Homo sapiens OX=9606 GN=LRSAM1 PE=1 SV=1                                               | 0,088552439  | 0,1939   |
| Q9BTE7 | DCN1-like protein 5 OS=Homo sapiens OX=9606 GN=DCN1D5 PE=1 SV=1                                                              | -0,09324418  | 0,193508 |
| Q13362 | Serine/threonine-protein phosphatase 2A 56 kDa regulatory subunit gamma isoform OS=Homo sapiens OX=9606 GN=PPP2R5C PE=1 SV=1 | 0,053711664  | 0,193291 |
| Q865X6 | Glutaredoxin-related protein 5, mitochondrial OS=Homo sapiens OX=9606 GN=GLRX5 PE=1 SV=2                                     | -0,088205408 | 0,193108 |
| Q99567 | Nuclear pore complex protein Nup88 OS=Homo sapiens OX=9606 GN=NUP88 PE=1 SV=2                                                | 0,053652194  | 0,193065 |
| Q8NFF4 | Nucleoporin Nup37 OS=Homo sapiens OX=9606 GN=NUP37 PE=1 SV=1                                                                 | -0,064471754 | 0,192989 |
| Q9HAV7 | GrpE protein homolog 1, mitochondrial OS=Homo sapiens OX=9606 GN=GRPEL1 PE=1 SV=2                                            | -0,038884395 | 0,192985 |
| Q92504 | Zinc transporter SLC39A7 OS=Homo sapiens OX=9606 GN=SLC39A7 PE=1 SV=2                                                        | 0,064205524  | 0,19215  |
| P53985 | Monocarboxylate transporter 1 OS=Homo sapiens OX=9606 GN=SLC16A1 PE=1 SV=3                                                   | -0,053274825 | 0,191632 |
| Q9NWB6 | Arginine and glutamate-rich protein 1 OS=Homo sapiens OX=9606 GN=ARGL1 PE=1 SV=1                                             | 0,030536003  | 0,191519 |
| Q01844 | RNA-binding protein EWS OS=Homo sapiens OX=9606 GN=EWSR1 PE=1 SV=1                                                           | 0,063836056  | 0,190986 |
| P62829 | 60S ribosomal protein L23 OS=Homo sapiens OX=9606 GN=RPL23 PE=1 SV=1                                                         | 0,038422554  | 0,190559 |
| P42025 | Beta-centractin OS=Homo sapiens OX=9606 GN=ACTR1B PE=1 SV=1                                                                  | -0,063133394 | 0,188774 |
| P68871 | Hemoglobin subunit beta OS=Homo sapiens OX=9606 GN=HBB PE=1 SV=2                                                             | -0,086027723 | 0,188141 |
| Q96RE7 | Nucleus accumbens-associated protein 1 OS=Homo sapiens OX=9606 GN=NACC1 PE=1 SV=1                                            | 0,06291031   | 0,188072 |
| P14635 | G2/mitotic-specific cyclin-B1 OS=Homo sapiens OX=9606 GN=CCNB1 PE=1 SV=1                                                     | 0,085986399  | 0,188047 |
| P21359 | Neurofibromin OS=Homo sapiens OX=9606 GN=NF1 PE=1 SV=2                                                                       | -0,085940905 | 0,187943 |
| Q9Y3E5 | Peptidyl-tRNA hydrolase 2, mitochondrial OS=Homo sapiens OX=9606 GN=PTRH2 PE=1 SV=1                                          | -0,052290619 | 0,187897 |
| Q2M2I8 | AP2-associated protein kinase 1 OS=Homo sapiens OX=9606 GN=AAK1 PE=1 SV=3                                                    | 0,033062547  | 0,187758 |
| Q03113 | #N/D                                                                                                                         | -0,031353606 | 0,187744 |
| Q6P179 | Endoplasmic reticulum aminopeptidase 2 OS=Homo sapiens OX=9606 GN=ERAP2 PE=1 SV=2                                            | -0,035149411 | 0,187316 |
| P31949 | Protein S100-A11 OS=Homo sapiens OX=9606 GN=S100A11 PE=1 SV=2                                                                | -0,035149013 | 0,187314 |
| P51688 | N-sulphoglucosamine sulphohydrolase OS=Homo sapiens OX=9606 GN=SGSH PE=1 SV=1                                                | 0,16402561   | 0,187199 |
| Q9H3N1 | Thioredoxin-related transmembrane protein 1 OS=Homo sapiens OX=9606 GN=TMX1 PE=1 SV=1                                        | 0,041094098  | 0,18691  |
| P54852 | Epithelial membrane protein 3 OS=Homo sapiens OX=9606 GN=EMP3 PE=1 SV=1                                                      | 0,062386688  | 0,186426 |
| P22033 | Methylmalonyl-CoA mutase, mitochondrial OS=Homo sapiens OX=9606 GN=MMUT PE=1 SV=4                                            | -0,04526109  | 0,185507 |
| Q13795 | ADP-ribosylation factor-related protein 1 OS=Homo sapiens OX=9606 GN=ARFR1 PE=1 SV=1                                         | -0,061851705 | 0,184745 |
| P08559 | Pyruvate dehydrogenase E1 component subunit alpha, somatic form, mitochondrial OS=Homo sapiens OX=9606 GN=PDHA1 PE=1 SV=3    | -0,025702667 | 0,184094 |
| Q9Y276 | Mitochondrial chaperone BCS1 OS=Homo sapiens OX=9606 GN=BCS1L PE=1 SV=1                                                      | 0,084188258  | 0,183952 |
| Q9Y237 | Peptidyl-prolyl cis-trans isomerase NIMA-interacting 4 OS=Homo sapiens OX=9606 GN=PIN4 PE=1 SV=1                             | 0,083896866  | 0,183288 |
| P61326 | Protein mago nashi homolog OS=Homo sapiens OX=9606 GN=MAGOH PE=1 SV=1                                                        | -0,040184144 | 0,182542 |
| Q95159 | Zinc finger protein-like 1 OS=Homo sapiens OX=9606 GN=ZFPL1 PE=1 SV=2                                                        | 0,044489242  | 0,182171 |
| Q96XC2 | BTB/POZ domain-containing protein KCTD12 OS=Homo sapiens OX=9606 GN=KCTD12 PE=1 SV=1                                         | 0,021701425  | 0,181952 |
| Q27BA0 | Kelch-like protein 40 OS=Homo sapiens OX=9606 GN=KLHL40 PE=1 SV=2                                                            | 0,074583352  | 0,181861 |
| P98175 | RNA-binding protein 10 OS=Homo sapiens OX=9606 GN=RBM10 PE=1 SV=3                                                            | -0,050203107 | 0,18     |
| Q9Y5J7 | Mitochondrial import inner membrane translocase subunit Tim9 OS=Homo sapiens OX=9606 GN=TIMM9 PE=1 SV=1                      | 0,0603349    | 0,179987 |
| Q9UJ14 | Glutathione hydrolase 7 OS=Homo sapiens OX=9606 GN=GGT7 PE=1 SV=2                                                            | -0,08223502  | 0,179509 |
| Q9UNDD | Glycolipid transfer protein OS=Homo sapiens OX=9606 GN=GLTP PE=1 SV=3                                                        | -0,043602932 | 0,178347 |
| Q8WVPS | Protein ELYS OS=Homo sapiens OX=9606 GN=AHCTF1 PE=1 SV=3                                                                     | 0,02540819   | 0,17804  |
| P51668 | Ubiquitin-conjugating enzyme E2 D1 OS=Homo sapiens OX=9606 GN=UBE2D1 PE=1 SV=1                                               | 0,059650604  | 0,177844 |
| Q724Q2 | HEAT repeat-containing protein 3 OS=Homo sapiens OX=9606 GN=HEATR3 PE=1 SV=2                                                 | -0,059613819 | 0,177728 |
| Q96AX1 | Vacuolar protein sorting-associated protein 33A OS=Homo sapiens OX=9606 GN=VPS33A PE=1 SV=1                                  | 0,043410897  | 0,177519 |
| Q9NT62 | Ubiquitin-like-conjugating enzyme ATG3 OS=Homo sapiens OX=9606 GN=ATG3 PE=1 SV=1                                             | -0,038962616 | 0,176694 |
| Q05707 | Collagen alpha-1(XIV) chain OS=Homo sapiens OX=9606 GN=COL14A1 PE=1 SV=3                                                     | 0,035743904  | 0,176556 |
| Q9HCD5 | Nuclear receptor coactivator 5 OS=Homo sapiens OX=9606 GN=NCOA5 PE=1 SV=2                                                    | 0,080830445  | 0,176319 |
| Q9NLZ4 | Hsp70-binding protein 1 OS=Homo sapiens OX=9606 GN=HSPBP1 PE=1 SV=2                                                          | 0,038789234  | 0,175865 |
| Q9UNL2 | Translocin-associated protein subunit gamma OS=Homo sapiens OX=9606 GN=SSR3 PE=1 SV=1                                        | 0,080599264  | 0,175795 |
| P21926 | CD9 antigen OS=Homo sapiens OX=9606 GN=CD9 PE=1 SV=4                                                                         | 0,048763065  | 0,174571 |
| Q04941 | Proteolipid protein 2 OS=Homo sapiens OX=9606 GN=PLP2 PE=1 SV=1                                                              | -0,080022157 | 0,174485 |
| P08758 | Annexin A5 OS=Homo sapiens OX=9606 GN=ANXA5 PE=1 SV=2                                                                        | 0,017326407  | 0,173492 |
| Q9NR19 | Acetyl-coenzyme A synthetase, cytoplasmic OS=Homo sapiens OX=9606 GN=ACSS2 PE=1 SV=1                                         | -0,079446108 | 0,173178 |
| Q8TD26 | Chromodomain-helicase-DNA-binding protein 6 OS=Homo sapiens OX=9606 GN=CHD6 PE=1 SV=4                                        | 0,079255113  | 0,172745 |
| Q9H061 | Transmembrane protein 126A OS=Homo sapiens OX=9606 GN=TMEM126A PE=1 SV=1                                                     | -0,079032147 | 0,172224 |
| Q9NPF7 | RNA polymerase II subunit A C-terminal domain phosphatase SSU72 OS=Homo sapiens OX=9606 GN=SSU72 PE=1 SV=1                   | 0,057788189  | 0,172022 |
| P61353 | 60S ribosomal protein L27 OS=Homo sapiens OX=9606 GN=RPL27 PE=1 SV=2                                                         | 0,034757285  | 0,171518 |
| Q06210 | Glutamine-fructose-6-phosphate aminotransferase [isomerizing] 1 OS=Homo sapiens OX=9606 GN=GFPT1 PE=1 SV=3                   | 0,014021274  | 0,171334 |
| Q96AM1 | Mas-related G-protein coupled receptor member F OS=Homo sapiens OX=9606 GN=MRGPRF PE=2 SV=1                                  | -0,078630866 | 0,17133  |
| Q5VZE5 | N-alpha-acetyltransferase 35, NatC auxiliary subunit OS=Homo sapiens OX=9606 GN=NAA35 PE=1 SV=1                              | -0,078611217 | 0,171286 |
| P31040 | Succinate dehydrogenase [ubiquinone] flavoprotein subunit, mitochondrial OS=Homo sapiens OX=9606 GN=SDHA PE=1 SV=2           | -0,023145088 | 0,171176 |
| P63165 | Small ubiquitin-related modifier 1 OS=Homo sapiens OX=9606 GN=SUMO1 PE=1 SV=1                                                | 0,047493028  | 0,169795 |
| Q75794 | Cell division cycle protein 123 homolog OS=Homo sapiens OX=9606 GN=CD123 PE=1 SV=1                                           | 0,13873199   | 0,169012 |
| Q96EU7 | C1GALT1-specific chaperone 1 OS=Homo sapiens OX=9606 GN=C1GALT1C1 PE=1 SV=1                                                  | 0,077239079  | 0,168178 |
| Q9ULC3 | Ras-related protein Rab-23 OS=Homo sapiens OX=9606 GN=RAB23 PE=1 SV=1                                                        | -0,037164158 | 0,168118 |
| Q75312 | Zinc finger protein ZPR1 OS=Homo sapiens OX=9606 GN=ZPR1 PE=1 SV=1                                                           | -0,031632319 | 0,167601 |
| Q9UJF2 | Ras GTPase-activating protein nGAP OS=Homo sapiens OX=9606 GN=RASAL2 PE=1 SV=2                                               | 0,04677926   | 0,167117 |
| P39019 | 40S ribosomal protein S19 OS=Homo sapiens OX=9606 GN=RPS19 PE=1 SV=2                                                         | -0,029526097 | 0,166635 |
| O00148 | ATP-dependent RNA helicase DDX39A OS=Homo sapiens OX=9606 GN=DDX39A PE=1 SV=2                                                | -0,021693318 | 0,165625 |
| P30085 | UMP-CMP kinase OS=Homo sapiens OX=9606 GN=CMPK1 PE=1 SV=3                                                                    | -0,025166524 | 0,165359 |
| Q9Y3D8 | Adenylate kinase isoenzyme 6 OS=Homo sapiens OX=9606 GN=AK6 PE=1 SV=1                                                        | -0,075797011 | 0,164916 |
| O14656 | Torsin-1A OS=Homo sapiens OX=9606 GN=TOR1A PE=1 SV=1                                                                         | -0,03348336  | 0,164821 |
| Q9NX58 | Cell growth-regulating nucleolar protein OS=Homo sapiens OX=9606 GN=LYAR PE=1 SV=2                                           | 0,055239707  | 0,164082 |
| Q9H3K6 | Bola-like protein 2 OS=Homo sapiens OX=9606 GN=BOLA2 PE=1 SV=1                                                               | 0,040215705  | 0,163804 |
| P48681 | Nestin OS=Homo sapiens OX=9606 GN=NES PE=1 SV=2                                                                              | 0,03325034   | 0,163615 |
| Q9Y5P6 | Mannose-1-phosphate guanylyltransferase beta OS=Homo sapiens OX=9606 GN=GMPPB PE=1 SV=2                                      | 0,033246146  | 0,163594 |
| Q9UHD9 | Ubiquitin-2 OS=Homo sapiens OX=9606 GN=UBQLN2 PE=1 SV=2                                                                      | 0,045737248  | 0,163213 |
| Q9BSH4 | Translational activator of cytochrome c oxidase 1 OS=Homo sapiens OX=9606 GN=TACO1 PE=1 SV=1                                 | -0,045641216 | 0,162853 |
| Q96C86 | m7GpppX diphosphatase OS=Homo sapiens OX=9606 GN=DCPS PE=1 SV=2                                                              | 0,045605119  | 0,162718 |
| P56537 | Eukaryotic translation initiation factor 6 OS=Homo sapiens OX=9606 GN=EIF6 PE=1 SV=1                                         | -0,027252408 | 0,162494 |
| Q96G23 | Ceramide synthase 2 OS=Homo sapiens OX=9606 GN=CERS2 PE=1 SV=1                                                               | 0,054708267  | 0,16243  |
| O511M5 | FK506-binding protein 15 OS=Homo sapiens OX=9606 GN=FKBP15 PE=1 SV=2                                                         | -0,024678553 | 0,161995 |
| P31321 | cAMP-dependent protein kinase type I-beta regulatory subunit OS=Homo sapiens OX=9606 GN=PRKAR1B PE=1 SV=4                    | -0,263128397 | 0,161769 |
| Q96974 | Ubiquitin-conjugating enzyme E2 E3 OS=Homo sapiens OX=9606 GN=UBE2E3 PE=1 SV=1                                               | -0,074386561 | 0,161729 |
| Q9GZ53 | WD repeat-containing protein 61 OS=Homo sapiens OX=9606 GN=WDR61 PE=1 SV=1                                                   | 0,030486709  | 0,161226 |
| P12235 | ADP/ATP translocase 1 OS=Homo sapiens OX=9606 GN=SLC25A4 PE=1 SV=4                                                           | 0,044809188  | 0,159743 |
| Q07020 | 60S ribosomal protein L18 OS=Homo sapiens OX=9606 GN=RPL18 PE=1 SV=2                                                         | 0,035310495  | 0,159321 |
| Q9ULG6 | Cell cycle progression protein 1 OS=Homo sapiens OX=9606 GN=CCPG1 PE=1 SV=3                                                  | 0,044657476  | 0,159176 |
| Q99447 | Ethanolamine-phosphate cytidylyltransferase OS=Homo sapiens OX=9606 GN=PCYT2 PE=1 SV=1                                       | -0,030093826 | 0,159045 |
| Q9P1F3 | Costars family protein ABRACL OS=Homo sapiens OX=9606 GN=ABRACL PE=1 SV=1                                                    | 0,073094799  | 0,158813 |
| Q6ZXV5 | Protein O-mannosyl-transferase TMTC3 OS=Homo sapiens OX=9606 GN=TMTC3 PE=1 SV=2                                              | -0,030049332 | 0,158798 |
| O60341 | Lysine-specific histone demethylase 1A OS=Homo sapiens OX=9606 GN=KDM1A PE=1 SV=2                                            | 0,053077168  | 0,157369 |
| P29353 | SHC-transforming protein 1 OS=Homo sapiens OX=9606 GN=SHC1 PE=1 SV=4                                                         | 0,044172402  | 0,157365 |
| Q9HOW9 | Ester hydrolase C11orf54 OS=Homo sapiens OX=9606 GN=C11orf54 PE=1 SV=1                                                       | -0,072122237 | 0,15662  |
| P55210 | Caspase-7 OS=Homo sapiens OX=9606 GN=CASP7 PE=1 SV=1                                                                         | -0,038416094 | 0,156125 |
| Q9BQK8 | Phosphatidate phosphatase LPIN3 OS=Homo sapiens OX=9606 GN=LPIN3 PE=1 SV=3                                                   | 0,071859027  | 0,156026 |
| O60547 | GDP-mannose 4,6 dehydratase OS=Homo sapiens OX=9606 GN=GMDS PE=1 SV=1                                                        | 0,034604326  | 0,155981 |
| Q6NYC8 | Phostensin OS=Homo sapiens OX=9606 GN=PPP1R18 PE=1 SV=1                                                                      | 0,018257513  | 0,155946 |
| Q15773 | Myeloid leukemia factor 2 OS=Homo sapiens OX=9606 GN=MLF2 PE=1 SV=1                                                          | -0,07749807  | 0,155724 |
| P62750 | 60S ribosomal protein L23a OS=Homo sapiens OX=9606 GN=RPL23A PE=1 SV=1                                                       | 0,02948077   | 0,155647 |

|        |                                                                                                                              |              |          |
|--------|------------------------------------------------------------------------------------------------------------------------------|--------------|----------|
| O43813 | Glutathione S-transferase LANCL1 OS=Homo sapiens OX=9606 GN=LANCL1 PE=1 SV=1                                                 | 0,031702485  | 0,15563  |
| Q9Y3E0 | Vesicle transport protein GOT1B OS=Homo sapiens OX=9606 GN=GOLT1B PE=1 SV=1                                                  | 0,052391915  | 0,155246 |
| O00625 | Pirin OS=Homo sapiens OX=9606 GN=PIR PE=1 SV=1                                                                               | 0,071193859  | 0,154528 |
| Q10471 | Polypeptide N-acetylgalactosaminyltransferase 2 OS=Homo sapiens OX=9606 GN=GALNT2 PE=1 SV=1                                  | 0,017628152  | 0,154316 |
| Q92572 | AP-3 complex subunit sigma-1 OS=Homo sapiens OX=9606 GN=AP3S1 PE=1 SV=1                                                      | -0,037956598 | 0,154169 |
| Q9H9Q2 | COP9 signalosome complex subunit 7b OS=Homo sapiens OX=9606 GN=COP57B PE=1 SV=1                                              | -0,052030986 | 0,154129 |
| Q9NZ32 | Actin-related protein 10 OS=Homo sapiens OX=9606 GN=ACTR10 PE=1 SV=1                                                         | 0,024528796  | 0,153405 |
| P63172 | Dynein light chain Tctex-type 1 OS=Homo sapiens OX=9606 GN=DYNLT1 PE=1 SV=1                                                  | 0,037733154  | 0,153219 |
| Q05087 | Cdc42 effector protein 1 OS=Homo sapiens OX=9606 GN=CDC42EP1 PE=1 SV=1                                                       | 0,037656631  | 0,152893 |
| Q8ND11 | EH domain-binding protein 1 OS=Homo sapiens OX=9606 GN=EHP1 PE=1 SV=3                                                        | 0,02570095   | 0,152797 |
| Q9NW68 | BSD domain-containing protein 1 OS=Homo sapiens OX=9606 GN=BSDC1 PE=1 SV=1                                                   | 0,070377925  | 0,152691 |
| P84090 | Enhancer of rudimentary homolog OS=Homo sapiens OX=9606 GN=ERH PE=1 SV=1                                                     | -0,051564788 | 0,152687 |
| O95169 | NADH dehydrogenase [ubiquinone] 1 beta subcomplex subunit 8, mitochondrial OS=Homo sapiens OX=9606 GN=NDUFB8 PE=1 SV=1       | -0,020539573 | 0,152236 |
| Q92925 | SWI/SNF-related matrix-associated actin-dependent regulator of chromatin subfamily D member 2 OS=Homo sapiens OX=9606 GN=SM/ | -0,051377132 | 0,152107 |
| Q9UFG5 | UPF0449 protein C19orf25 OS=Homo sapiens OX=9606 GN=C19orf25 PE=1 SV=2                                                       | -0,094898309 | 0,152098 |
| P55795 | Heterogeneous nuclear ribonucleoprotein H2 OS=Homo sapiens OX=9606 GN=HNRNP2 PE=1 SV=1                                       | 0,033730967  | 0,151858 |
| Q9P2X0 | Dolichol-phosphate mannosyltransferase subunit 3 OS=Homo sapiens OX=9606 GN=DPM3 PE=1 SV=2                                   | -0,074109131 | 0,15179  |
| Q86U42 | Polyadenylate-binding protein 2 OS=Homo sapiens OX=9606 GN=PABPN1 PE=1 SV=3                                                  | 0,033645401  | 0,151455 |
| Q2M1P5 | Kinesin-like protein KIF7 OS=Homo sapiens OX=9606 GN=KIF7 PE=1 SV=2                                                          | -0,069728978 | 0,15123  |
| Q96L92 | Sorting nexin-27 OS=Homo sapiens OX=9606 GN=SNX27 PE=1 SV=2                                                                  | -0,069556757 | 0,150843 |
| Q96JN8 | Neutralized-like protein 4 OS=Homo sapiens OX=9606 GN=NEURL4 PE=1 SV=2                                                       | 0,069548158  | 0,150824 |
| P55196 | Afadin OS=Homo sapiens OX=9606 GN=AFDN PE=1 SV=3                                                                             | 0,050908795  | 0,15066  |
| P09038 | Fibroblast growth factor 2 OS=Homo sapiens OX=9606 GN=FGF2 PE=1 SV=3                                                         | -0,042342415 | 0,15055  |
| P22090 | 40S ribosomal protein S4, Y isoform 1 OS=Homo sapiens OX=9606 GN=RPS4Y1 PE=1 SV=2                                            | -0,022931878 | 0,149985 |
| Q16363 | Laminin subunit alpha-4 OS=Homo sapiens OX=9606 GN=LAMA4 PE=1 SV=4                                                           | 0,069154385  | 0,149938 |
| Q15382 | GTP-binding protein Rheb OS=Homo sapiens OX=9606 GN=RHEB PE=1 SV=1                                                           | -0,030501871 | 0,14946  |
| P00491 | Purine nucleoside phosphorylase OS=Homo sapiens OX=9606 GN=PNP PE=1 SV=2                                                     | -0,017998444 | 0,149433 |
| Q14696 | LRP chaperone MESD OS=Homo sapiens OX=9606 GN=MESD PE=1 SV=2                                                                 | -0,028094573 | 0,147988 |
| P02545 | Prelamin-A/C OS=Homo sapiens OX=9606 GN=LMNA PE=1 SV=1                                                                       | 0,010087689  | 0,147671 |
| Q9Y5Q0 | Fatty acid desaturase 3 OS=Homo sapiens OX=9606 GN=FADS3 PE=1 SV=1                                                           | 0,036243472  | 0,146896 |
| P10155 | 60 kDa SS-A/Ro ribonucleoprotein OS=Homo sapiens OX=9606 GN=RO60 PE=1 SV=2                                                   | 0,021517361  | 0,14661  |
| Q7L2E3 | ATP-dependent RNA helicase DHX30 OS=Homo sapiens OX=9606 GN=DHX30 PE=1 SV=1                                                  | 0,029926877  | 0,146513 |
| Q969N2 | GPL transamidase component PIG-T OS=Homo sapiens OX=9606 GN=PIGT PE=1 SV=1                                                   | 0,032457608  | 0,145865 |
| O60504 | Vinexin OS=Homo sapiens OX=9606 GN=SORBS3 PE=1 SV=2                                                                          | -0,032456648 | 0,145861 |
| Q9HAV4 | Exportin-5 OS=Homo sapiens OX=9606 GN=XPO5 PE=1 SV=1                                                                         | 0,03236768   | 0,145443 |
| Q9UBI1 | COMM domain-containing protein 3 OS=Homo sapiens OX=9606 GN=COMM3 PE=1 SV=1                                                  | -0,040836017 | 0,144959 |
| Q6UXN9 | WD repeat-containing protein 82 OS=Homo sapiens OX=9606 GN=WDR82 PE=1 SV=1                                                   | 0,048759896  | 0,144033 |
| P04350 | #N/D                                                                                                                         | -0,031966291 | 0,143558 |
| Q9Y3L5 | Ras-related protein Rap-2c OS=Homo sapiens OX=9606 GN=RAP2C PE=1 SV=1                                                        | -0,111573028 | 0,143163 |
| Q8N138 | ORM1-like protein 3 OS=Homo sapiens OX=9606 GN=ORMDL3 PE=1 SV=1                                                              | -0,066070658 | 0,143014 |
| O14602 | Eukaryotic translation initiation factor 1A, Y-chromosomal OS=Homo sapiens OX=9606 GN=EIF1AY PE=1 SV=4                       | -0,061760401 | 0,142652 |
| Q9BV12 | Nucleoporin p58/p45 OS=Homo sapiens OX=9606 GN=NUP58 PE=1 SV=1                                                               | -0,065768393 | 0,142336 |
| Q5PRF9 | Protein Smaug homolog 2 OS=Homo sapiens OX=9606 GN=SAMD4B PE=1 SV=1                                                          | -0,088131874 | 0,142186 |
| Q99471 | Prefoldin subunit 5 OS=Homo sapiens OX=9606 GN=PFDN5 PE=1 SV=2                                                               | 0,025299035  | 0,141714 |
| O60333 | Kinesin-like protein KIF1B OS=Homo sapiens OX=9606 GN=KIF1B PE=1 SV=5                                                        | 0,047521692  | 0,140225 |
| Q9H7D7 | WD repeat-containing protein 26 OS=Homo sapiens OX=9606 GN=WDR26 PE=1 SV=3                                                   | 0,047402793  | 0,13986  |
| Q9Y2A7 | Nck-associated protein 1 OS=Homo sapiens OX=9606 GN=NCKAP1 PE=1 SV=1                                                         | -0,015662813 | 0,1398   |
| Q86UE4 | Protein LYRIC OS=Homo sapiens OX=9606 GN=MTDH PE=1 SV=2                                                                      | 0,018443955  | 0,139712 |
| Q9BZE1 | 39S ribosomal protein L37, mitochondrial OS=Homo sapiens OX=9606 GN=MRPL37 PE=1 SV=2                                         | -0,031121976 | 0,139601 |
| Q6KCM7 | Calcium-binding mitochondrial carrier protein ScaMC-2 OS=Homo sapiens OX=9606 GN=SLC25A25 PE=1 SV=1                          | -0,203943299 | 0,139572 |
| Q85U86 | Protein polybromo-1 OS=Homo sapiens OX=9606 GN=PBRM1 PE=1 SV=1                                                               | 0,075501812  | 0,139418 |
| Q9UDT6 | CAP-Gly domain-containing linker protein 2 OS=Homo sapiens OX=9606 GN=CLIP2 PE=1 SV=1                                        | 0,028439896  | 0,138915 |
| Q9BQ39 | ATP-dependent RNA helicase DDX50 OS=Homo sapiens OX=9606 GN=DDX50 PE=1 SV=1                                                  | 0,034318408  | 0,138758 |
| P52292 | Importin subunit alpha-1 OS=Homo sapiens OX=9606 GN=KPNA2 PE=1 SV=1                                                          | 0,019624222  | 0,138646 |
| P23497 | Nuclear autoantigen Sp-100 OS=Homo sapiens OX=9606 GN=SP100 PE=1 SV=3                                                        | -0,023404756 | 0,138546 |
| Q8N6M0 | Deubiquitinase OTUD6B OS=Homo sapiens OX=9606 GN=OTUD6B PE=1 SV=1                                                            | -0,119703355 | 0,138523 |
| P24390 | ER lumen protein-retaining receptor 1 OS=Homo sapiens OX=9606 GN=KDEL1 PE=1 SV=1                                             | -0,046758671 | 0,137883 |
| Q676U5 | Autophagy-related protein 16-1 OS=Homo sapiens OX=9606 GN=ATG16L1 PE=1 SV=2                                                  | 0,063740399  | 0,137794 |
| P28039 | Acyloxyacyl hydrolase OS=Homo sapiens OX=9606 GN=AOAH PE=1 SV=1                                                              | -0,063728424 | 0,137768 |
| P82933 | 28S ribosomal protein S9, mitochondrial OS=Homo sapiens OX=9606 GN=MRPS9 PE=1 SV=2                                           | 0,03877683   | 0,137343 |
| O75934 | Pre-mRNA-splicing factor SPF27 OS=Homo sapiens OX=9606 GN=BCAS2 PE=1 SV=1                                                    | -0,046570532 | 0,137305 |
| Q8IW76 | Volume-regulated anion channel subunit LRRC8A OS=Homo sapiens OX=9606 GN=LRRC8A PE=1 SV=1                                    | -0,05619892  | 0,137111 |
| Q9UI30 | Multifunctional methyltransferase subunit TRM112-like protein OS=Homo sapiens OX=9606 GN=TRMT112 PE=1 SV=1                   | -0,046487368 | 0,13705  |
| P17661 | Desmin OS=Homo sapiens OX=9606 GN=DES PE=1 SV=3                                                                              | 0,03868884   | 0,137018 |
| Q9Y3C8 | Ubiquitin-fold modifier-conjugating enzyme 1 OS=Homo sapiens OX=9606 GN=UFC1 PE=1 SV=3                                       | -0,046379243 | 0,136719 |
| Q14CX7 | N-alpha-acetyltransferase 25, NatB auxiliary subunit OS=Homo sapiens OX=9606 GN=NAA25 PE=1 SV=1                              | -0,04635215  | 0,136635 |
| P62942 | Peptidyl-prolyl cis-trans isomerase FKBP1A OS=Homo sapiens OX=9606 GN=FKBP1A PE=1 SV=2                                       | 0,030393317  | 0,136192 |
| Q93052 | Lipoma-preferred partner OS=Homo sapiens OX=9606 GN=LPP PE=1 SV=1                                                            | 0,01857747   | 0,135933 |
| Q8IYM9 | E3 ubiquitin-protein ligase TRIM22 OS=Homo sapiens OX=9606 GN=TRIM22 PE=1 SV=1                                               | 0,062859566  | 0,135824 |
| P61106 | Ras-related protein Rab-14 OS=Homo sapiens OX=9606 GN=RAB14 PE=1 SV=4                                                        | -0,019232463 | 0,135757 |
| P0C7V7 | #N/D                                                                                                                         | -0,101598438 | 0,134863 |
| Q8TE73 | Dynein heavy chain 5, axonemal OS=Homo sapiens OX=9606 GN=DNAH5 PE=1 SV=3                                                    | 0,062372454  | 0,134736 |
| Q8NFW8 | N-acylneuraminate cytidyltransferase OS=Homo sapiens OX=9606 GN=CMAS PE=1 SV=2                                               | 0,062227327  | 0,134411 |
| Q66K14 | TBC1 domain family member 9B OS=Homo sapiens OX=9606 GN=TBC1D9B PE=1 SV=3                                                    | -0,062133488 | 0,134202 |
| P16104 | Histone H2AX OS=Homo sapiens OX=9606 GN=H2AFX PE=1 SV=2                                                                      | -0,062059055 | 0,134035 |
| Q13423 | NAD(P) transhydrogenase, mitochondrial OS=Homo sapiens OX=9606 GN=NNT PE=1 SV=3                                              | -0,015016244 | 0,13378  |
| Q86U11 | Pleckstrin homology-like domain family B member 1 OS=Homo sapiens OX=9606 GN=PHLDB1 PE=1 SV=1                                | -0,022478593 | 0,132831 |
| O43663 | Protein regulator of cytokinesis 1 OS=Homo sapiens OX=9606 GN=PRC1 PE=1 SV=2                                                 | -0,044911379 | 0,132222 |
| Q9NR45 | Sialic acid synthase OS=Homo sapiens OX=9606 GN=NANS PE=1 SV=2                                                               | -0,021260514 | 0,132105 |
| P16401 | Histone H1.5 OS=Homo sapiens OX=9606 GN=HIST1H1B PE=1 SV=3                                                                   | 0,022314564  | 0,13182  |
| Q7Z3U7 | Protein MON2 homolog OS=Homo sapiens OX=9606 GN=MON2 PE=1 SV=3                                                               | 0,025086278  | 0,131482 |
| P01210 | Proenkephalin-A OS=Homo sapiens OX=9606 GN=PENK PE=1 SV=1                                                                    | -0,080218447 | 0,131276 |
| O00442 | RNA 3'-terminal phosphate cyclase OS=Homo sapiens OX=9606 GN=RTCA PE=1 SV=1                                                  | 0,044600758  | 0,131272 |
| Q93050 | V-type proton ATPase 116 kDa subunit a isoform 1 OS=Homo sapiens OX=9606 GN=ATP6V0A1 PE=1 SV=3                               | -0,032476747 | 0,131008 |
| Q57457 | E3 ubiquitin-protein ligase UBR4 OS=Homo sapiens OX=9606 GN=UBR4 PE=1 SV=1                                                   | -0,008280719 | 0,13065  |
| P36405 | ADP-ribosylation factor-like protein 3 OS=Homo sapiens OX=9606 GN=ARL3 PE=1 SV=2                                             | -0,023402488 | 0,130648 |
| Q9UJ70 | N-acetyl-D-glucosamine kinase OS=Homo sapiens OX=9606 GN=NAGK PE=1 SV=4                                                      | -0,017870002 | 0,130538 |
| O95372 | Acyl-protein thioesterase 2 OS=Homo sapiens OX=9606 GN=LYPLA2 PE=1 SV=1                                                      | 0,029167267  | 0,130473 |
| Q14C86 | GTPase-activating protein and VPS9 domain-containing protein 1 OS=Homo sapiens OX=9606 GN=GAPVD1 PE=1 SV=2                   | -0,026680067 | 0,129966 |
| O15530 | 3-phosphoinositide-dependent protein kinase 1 OS=Homo sapiens OX=9606 GN=PKP1 PE=1 SV=1                                      | -0,060154117 | 0,129783 |
| Q8IX12 | Cell division cycle and apoptosis regulator protein 1 OS=Homo sapiens OX=9606 GN=CCAR1 PE=1 SV=2                             | -0,024704698 | 0,129399 |
| Q76061 | Stanniocalcin-2 OS=Homo sapiens OX=9606 GN=STC2 PE=1 SV=1                                                                    | -0,03657267  | 0,129226 |
| Q92905 | COP9 signalosome complex subunit 5 OS=Homo sapiens OX=9606 GN=COP55 PE=1 SV=4                                                | -0,019871416 | 0,129141 |
| Q15392 | Delta(24)-sterol reductase OS=Homo sapiens OX=9606 GN=DHCR24 PE=1 SV=2                                                       | -0,043524383 | 0,127983 |
| P50395 | Rab GDP dissociation inhibitor beta OS=Homo sapiens OX=9606 GN=GDII2 PE=1 SV=2                                               | 0,013423799  | 0,127426 |
| Q86V81 | THO complex subunit 4 OS=Homo sapiens OX=9606 GN=ALYREF PE=1 SV=3                                                            | 0,024264612  | 0,127001 |
| Q9BUT1 | 3-hydroxybutyrate dehydrogenase type 2 OS=Homo sapiens OX=9606 GN=BDH2 PE=1 SV=2                                             | -0,031453686 | 0,126717 |
| Q96559 | Ran-binding protein 9 OS=Homo sapiens OX=9606 GN=RBPN9 PE=1 SV=1                                                             | 0,031436891  | 0,126647 |

|        |                                                                                                             |              |          |
|--------|-------------------------------------------------------------------------------------------------------------|--------------|----------|
| Q9BVJ6 | U3 small nucleolar RNA-associated protein 14 homolog A OS=Homo sapiens OX=9606 GN=UTP14A PE=1 SV=1          | 0,031367443  | 0,126356 |
| Q9Y2S7 | Polymerase delta-interacting protein 2 OS=Homo sapiens OX=9606 GN=POLDIP2 PE=1 SV=1                         | -0,058410896 | 0,125899 |
| Q9UJZ1 | Stomatin-like protein 2, mitochondrial OS=Homo sapiens OX=9606 GN=STOML2 PE=1 SV=1                          | 0,021312519  | 0,125662 |
| P11047 | Laminin subunit gamma-1 OS=Homo sapiens OX=9606 GN=LAMC1 PE=1 SV=3                                          | -0,010839309 | 0,125541 |
| P98194 | Calcium-transporting ATPase type 2C member 1 OS=Homo sapiens OX=9606 GN=ATP2C1 PE=1 SV=3                    | 0,031166668  | 0,125306 |
| Q12841 | Follistatin-related protein 1 OS=Homo sapiens OX=9606 GN=FSTL1 PE=1 SV=1                                    | -0,017809173 | 0,125305 |
| Q9BRJ6 | Uncharacterized protein C7orf50 OS=Homo sapiens OX=9606 GN=C7orf50 PE=1 SV=1                                | -0,035386053 | 0,124872 |
| Q6NUP7 | Serine/threonine-protein phosphatase 4 regulatory subunit 4 OS=Homo sapiens OX=9606 GN=PPP4R4 PE=1 SV=1     | 0,281385438  | 0,124772 |
| Q9UKD2 | mRNA turnover protein 4 homolog OS=Homo sapiens OX=9606 GN=MRTO4 PE=1 SV=2                                  | -0,057892843 | 0,124746 |
| Q9UBN7 | Histone deacetylase 6 OS=Homo sapiens OX=9606 GN=HDAC6 PE=1 SV=2                                            | 0,057827079  | 0,124599 |
| P24385 | G1/S-specific cyclin-D1 OS=Homo sapiens OX=9606 GN=CCND1 PE=1 SV=1                                          | -0,057673986 | 0,124259 |
| Q9BZV1 | UBX domain-containing protein 6 OS=Homo sapiens OX=9606 GN=UBXN6 PE=1 SV=1                                  | 0,027787939  | 0,124061 |
| Q5SWX8 | Protein odr-4 homolog OS=Homo sapiens OX=9606 GN=ODR4 PE=1 SV=1                                             | -0,033644304 | 0,124054 |
| Q53GQ0 | Very-long-chain 3-oxoacyl-CoA reductase OS=Homo sapiens OX=9606 GN=HSD17B12 PE=1 SV=2                       | 0,019971221  | 0,123775 |
| Q13283 | Ras GTPase-activating protein-binding protein 1 OS=Homo sapiens OX=9606 GN=G3BP1 PE=1 SV=1                  | -0,017597873 | 0,123759 |
| Q05639 | #N/D                                                                                                        | 0,019047419  | 0,123573 |
| Q9UBG0 | C-type mannose receptor 2 OS=Homo sapiens OX=9606 GN=MRC2 PE=1 SV=2                                         | 0,011833894  | 0,123114 |
| Q9UNP9 | Peptidyl-prolyl cis-trans isomerase E OS=Homo sapiens OX=9606 GN=PPIE PE=1 SV=1                             | 0,101467535  | 0,123052 |
| Q9Y6D5 | Brefeldin A-inhibited guanine nucleotide-exchange protein 2 OS=Homo sapiens OX=9606 GN=ARFGEP2 PE=1 SV=3    | -0,019857489 | 0,123042 |
| P08962 | CD63 antigen OS=Homo sapiens OX=9606 GN=CD63 PE=1 SV=2                                                      | -0,056940444 | 0,122627 |
| Q75663 | TIP41-like protein OS=Homo sapiens OX=9606 GN=TIPRL PE=1 SV=2                                               | 0,021859615  | 0,121699 |
| Q9BT08 | RNA-binding protein 42 OS=Homo sapiens OX=9606 GN=RBM42 PE=1 SV=1                                           | -0,056394495 | 0,121414 |
| Q96A33 | Coiled-coil domain-containing protein 47 OS=Homo sapiens OX=9606 GN=CCDC47 PE=1 SV=1                        | -0,015605605 | 0,121284 |
| Q9Y3U8 | 60S ribosomal protein L36 OS=Homo sapiens OX=9606 GN=RPL36 PE=1 SV=3                                        | -0,02711952  | 0,120962 |
| Q13884 | Beta-1-syntrophin OS=Homo sapiens OX=9606 GN=SNTP1 PE=1 SV=3                                                | -0,029985063 | 0,120576 |
| Q9ZUJ1 | Leucine-rich repeat transmembrane protein FLRT1 OS=Homo sapiens OX=9606 GN=FLRT1 PE=1 SV=3                  | -0,11877811  | 0,120449 |
| Q9UGP8 | Translocation protein SEC63 homolog OS=Homo sapiens OX=9606 GN=SEC63 PE=1 SV=2                              | 0,015967834  | 0,120228 |
| O15439 | Multidrug resistance-associated protein 4 OS=Homo sapiens OX=9606 GN=ABCC4 PE=1 SV=3                        | 0,040836085  | 0,119795 |
| Q9BQ52 | Zinc phosphodiesterase ELAC protein 2 OS=Homo sapiens OX=9606 GN=ELAC2 PE=1 SV=2                            | 0,115671786  | 0,119617 |
| P36543 | V-type proton ATPase subunit E 1 OS=Homo sapiens OX=9606 GN=ATP6V1E1 PE=1 SV=1                              | -0,021468019 | 0,119435 |
| P05091 | Aldehyde dehydrogenase, mitochondrial OS=Homo sapiens OX=9606 GN=ALDH2 PE=1 SV=2                            | 0,020293304  | 0,119422 |
| Q01650 | Large neutral amino acids transporter small subunit 1 OS=Homo sapiens OX=9606 GN=SLC7A5 PE=1 SV=2           | 0,055016483  | 0,118354 |
| Q81WV7 | E3 ubiquitin-protein ligase UBR1 OS=Homo sapiens OX=9606 GN=UBR1 PE=1 SV=1                                  | -0,040317557 | 0,118219 |
| Q03169 | Tumor necrosis factor alpha-induced protein 2 OS=Homo sapiens OX=9606 GN=TNFAIP2 PE=2 SV=2                  | 0,054929817  | 0,118161 |
| P47813 | #N/D                                                                                                        | 0,040275109  | 0,118091 |
| Q9Y2W1 | Thyroid hormone receptor-associated protein 3 OS=Homo sapiens OX=9606 GN=THRAP3 PE=1 SV=2                   | -0,016813322 | 0,118031 |
| Q9UDR5 | Alpha-aminoacidic semialdehyde synthase, mitochondrial OS=Homo sapiens OX=9606 GN=AASS PE=1 SV=1            | -0,054822004 | 0,117922 |
| Q6DN90 | IQ motif and SEC7 domain-containing protein 1 OS=Homo sapiens OX=9606 GN=IQSEC1 PE=1 SV=1                   | -0,033354687 | 0,117442 |
| P48047 | ATP synthase subunit O, mitochondrial OS=Homo sapiens OX=9606 GN=ATP5PO PE=1 SV=1                           | 0,018910314  | 0,116951 |
| Q9HCU0 | Endosialin OS=Homo sapiens OX=9606 GN=CD248 PE=1 SV=1                                                       | -0,016060556 | 0,116821 |
| O00506 | Serine/threonine-protein kinase 25 OS=Homo sapiens OX=9606 GN=STK25 PE=1 SV=1                               | 0,024040756  | 0,116631 |
| Q9NZT2 | Opioid growth factor receptor OS=Homo sapiens OX=9606 GN=OGFR PE=1 SV=3                                     | -0,032987749 | 0,116103 |
| P55285 | Cadherin-6 OS=Homo sapiens OX=9606 GN=CDH6 PE=1 SV=1                                                        | -0,028769178 | 0,115508 |
| Q6EMB2 | Tubulin polyglutamylase TTL5 OS=Homo sapiens OX=9606 GN=TTL5 PE=1 SV=3                                      | 0,068688844  | 0,115318 |
| Q9Y3B4 | Splicing factor 3B subunit 6 OS=Homo sapiens OX=9606 GN=SF3B6 PE=1 SV=1                                     | -0,039330367 | 0,115224 |
| Q9V6N5 | Sulfide:quinone oxidoreductase, mitochondrial OS=Homo sapiens OX=9606 GN=SQOR PE=1 SV=1                     | -0,015315001 | 0,115129 |
| P31150 | Rub GDP dissociation inhibitor alpha OS=Homo sapiens OX=9606 GN=GD1I PE=1 SV=2                              | 0,011681499  | 0,114879 |
| O60524 | Nuclear export mediator factor NEMF OS=Homo sapiens OX=9606 GN=NEMF PE=1 SV=4                               | 0,3155544    | 0,114819 |
| Q9BYG3 | MKI67 FHA domain-interacting nucleolar phosphoprotein OS=Homo sapiens OX=9606 GN=NIFK PE=1 SV=1             | 0,028562516  | 0,114649 |
| P19784 | Casein kinase II subunit alpha' OS=Homo sapiens OX=9606 GN=CSNK2A2 PE=1 SV=1                                | -0,025581968 | 0,113855 |
| Q00537 | Cyclin-dependent kinase 17 OS=Homo sapiens OX=9606 GN=CDK17 PE=1 SV=2                                       | -0,052855687 | 0,113849 |
| Q15008 | 26S proteasome non-ATPase regulatory subunit 6 OS=Homo sapiens OX=9606 GN=P5MD6 PE=1 SV=1                   | 0,014239371  | 0,11371  |
| Q8NFP9 | Neurobeachin OS=Homo sapiens OX=9606 GN=NBEA PE=1 SV=3                                                      | -0,05257555  | 0,112943 |
| P53007 | Tricarboxylate transport protein, mitochondrial OS=Homo sapiens OX=9606 GN=SLC25A1 PE=1 SV=2                | 0,032035278  | 0,112633 |
| P67775 | Serine/threonine phosphatase 2A catalytic subunit alpha isoform OS=Homo sapiens OX=9606 GN=PPP2CA PE=1 SV=1 | 0,052269519  | 0,112266 |
| Q9H845 | Acyl-CoA dehydrogenase family member 9, mitochondrial OS=Homo sapiens OX=9606 GN=ACAD9 PE=1 SV=1            | -0,022915704 | 0,110978 |
| P22695 | Cytochrome b-c1 complex subunit 2, mitochondrial OS=Homo sapiens OX=9606 GN=UQCRC2 PE=1 SV=3                | -0,014769314 | 0,110878 |
| P30260 | Cell division cycle protein 27 homolog OS=Homo sapiens OX=9606 GN=CDC27 PE=1 SV=2                           | -0,037816676 | 0,11064  |
| P14923 | #N/D                                                                                                        | -0,03144881  | 0,1105   |
| Q9H6Y2 | WD repeat-containing protein 55 OS=Homo sapiens OX=9606 GN=WDR55 PE=1 SV=2                                  | -0,03163283  | 0,109599 |
| Q9H254 | Spectrin beta chain, non-erythrocytic 4 OS=Homo sapiens OX=9606 GN=SPTBN4 PE=1 SV=2                         | -0,037405135 | 0,109396 |
| Q2TAY7 | WD40 repeat-containing protein SMU1 OS=Homo sapiens OX=9606 GN=SMU1 PE=1 SV=2                               | 0,022408362  | 0,108435 |
| Q6PCB7 | Long-chain fatty acid transport protein 1 OS=Homo sapiens OX=9606 GN=SLC27A1 PE=1 SV=1                      | 0,027023513  | 0,108259 |
| Q15345 | Leucine-rich repeat-containing protein 41 OS=Homo sapiens OX=9606 GN=LRRCA1 PE=1 SV=3                       | -0,050311882 | 0,107938 |
| Q9NVH0 | Exonuclease 3'-5' domain-containing protein 2 OS=Homo sapiens OX=9606 GN=EXO2 PE=1 SV=2                     | 0,05012643   | 0,107528 |
| Q9Y3E7 | Charged multivesicular body protein 3 OS=Homo sapiens OX=9606 GN=CHMP3 PE=1 SV=3                            | 0,024200926  | 0,107497 |
| Q969E8 | Pre-rRNA-processing protein TSR2 homolog OS=Homo sapiens OX=9606 GN=TSR2 PE=1 SV=1                          | 0,055803604  | 0,107401 |
| Q9P299 | Coatomer subunit zeta-2 OS=Homo sapiens OX=9606 GN=COP2 PE=2 SV=1                                           | -0,030457063 | 0,106898 |
| Q86VV6 | Stimulator of interferon genes protein OS=Homo sapiens OX=9606 GN=TMEM173 PE=1 SV=1                         | 0,030339011  | 0,10647  |
| Q86TX2 | Acyl-coenzyme A thioesterase 1 OS=Homo sapiens OX=9606 GN=ACOT1 PE=1 SV=1                                   | -0,018162869 | 0,106453 |
| Q9B709 | Protein canopy homolog 3 OS=Homo sapiens OX=9606 GN=CNPY3 PE=1 SV=1                                         | -0,023785743 | 0,105591 |
| Q9BVC6 | Transmembrane protein 109 OS=Homo sapiens OX=9606 GN=TMEM109 PE=1 SV=1                                      | 0,036143753  | 0,105588 |
| P62861 | 40S ribosomal protein S30 OS=Homo sapiens OX=9606 GN=FAU PE=1 SV=1                                          | -0,049110755 | 0,105287 |
| P14678 | Small nuclear ribonucleoprotein-associated proteins B and B' OS=Homo sapiens OX=9606 GN=SNRNP PE=1 SV=2     | -0,021741606 | 0,1051   |
| P98082 | Disabled homolog 2 OS=Homo sapiens OX=9606 GN=DAB2 PE=1 SV=3                                                | 0,014903491  | 0,104169 |
| P80303 | Nucleobindin-2 OS=Homo sapiens OX=9606 GN=NUCB2 PE=1 SV=3                                                   | 0,01347076   | 0,104129 |
| Q60749 | Sorting nexin-2 OS=Homo sapiens OX=9606 GN=SNX2 PE=1 SV=2                                                   | -0,015439402 | 0,10381  |
| Q92930 | Ras-related protein Rab-8B OS=Homo sapiens OX=9606 GN=RAB8B PE=1 SV=2                                       | -0,04838909  | 0,103695 |
| Q9BX95 | Sphingosine-1-phosphate phosphatase 1 OS=Homo sapiens OX=9606 GN=SGPP1 PE=1 SV=2                            | -0,048111818 | 0,103084 |
| Q75695 | Protein XRP2 OS=Homo sapiens OX=9606 GN=RP2 PE=1 SV=4                                                       | -0,025750168 | 0,10299  |
| Q9Y5Y2 | Cytosolic Fe-S cluster assembly factor NUBP2 OS=Homo sapiens OX=9606 GN=NUBP2 PE=1 SV=1                     | 0,021136268  | 0,102077 |
| P63173 | 60S ribosomal protein L38 OS=Homo sapiens OX=9606 GN=RPL38 PE=1 SV=2                                        | 0,047456396  | 0,10164  |
| O95336 | 6-phosphogluconolactonase OS=Homo sapiens OX=9606 GN=PGLS PE=1 SV=2                                         | -0,014545193 | 0,101582 |
| Q9Y3C1 | Nucleolar protein 16 OS=Homo sapiens OX=9606 GN=NOP16 PE=1 SV=2                                             | -0,020939976 | 0,101537 |
| P53621 | Coatomer subunit alpha OS=Homo sapiens OX=9606 GN=COPA PE=1 SV=2                                            | 0,00669049   | 0,101445 |
| Q07889 | Son of sevenless homolog 1 OS=Homo sapiens OX=9606 GN=SO51 PE=1 SV=1                                        | 0,095908821  | 0,100817 |
| Q53H12 | Acylglycerol kinase, mitochondrial OS=Homo sapiens OX=9606 GN=AGK PE=1 SV=2                                 | 0,025220848  | 0,100805 |
| Q16186 | Proteasomal ubiquitin receptor ADRM1 OS=Homo sapiens OX=9606 GN=ADRM1 PE=1 SV=2                             | -0,020799239 | 0,100396 |
| P07919 | Cytochrome b-c1 complex subunit 6, mitochondrial OS=Homo sapiens OX=9606 GN=UQCRC1 PE=1 SV=2                | 0,046511582  | 0,099561 |
| Q75487 | Glypican-4 OS=Homo sapiens OX=9606 GN=GPC4 PE=1 SV=4                                                        | 0,019168858  | 0,099475 |
| Q9BRA2 | Thioredoxin domain-containing protein 17 OS=Homo sapiens OX=9606 GN=TXNDC17 PE=1 SV=1                       | 0,024843035  | 0,099247 |
| Q15942 | Zyxin OS=Homo sapiens OX=9606 GN=ZYX PE=1 SV=1                                                              | 0,01247363   | 0,099152 |
| Q96C01 | Protein FAM136A OS=Homo sapiens OX=9606 GN=FAM136A PE=1 SV=1                                                | -0,046294421 | 0,099083 |
| Q16204 | Eukaryotic translation initiation factor 6 OS=Homo sapiens OX=9606 GN=CCDC6 PE=1 SV=2                       | -0,017840939 | 0,098612 |
| P41214 | Eukaryotic translation initiation factor 2D OS=Homo sapiens OX=9606 GN=EIF2D PE=1 SV=3                      | -0,024342978 | 0,097187 |
| Q96A79 | Ribulose-phosphate 3-epimerase OS=Homo sapiens OX=9606 GN=RPE PE=1 SV=1                                     | 0,04536622   | 0,097042 |
| P30837 | Aldehyde dehydrogenase X, mitochondrial OS=Homo sapiens OX=9606 GN=ALDH1B1 PE=1 SV=3                        | -0,016590828 | 0,096948 |
| P08708 | 40S ribosomal protein S17 OS=Homo sapiens OX=9606 GN=RPS17 PE=1 SV=2                                        | -0,018693993 | 0,096933 |

|         |                                                                                                                      |              |          |
|---------|----------------------------------------------------------------------------------------------------------------------|--------------|----------|
| Q9Y2Q5  | Regulator complex protein LAMTOR2 OS=Homo sapiens OX=9606 GN=LAMTOR2 PE=1 SV=1                                       | -0,033259231 | 0,09691  |
| Q9H1Y0  | Autophagy protein 5 OS=Homo sapiens OX=9606 GN=ATG5 PE=1 SV=2                                                        | 0,033252827  | 0,096891 |
| P23786  | Carnitine O-palmitoyltransferase 2, mitochondrial OS=Homo sapiens OX=9606 GN=CPT2 PE=1 SV=2                          | 0,045224979  | 0,096732 |
| O43684  | Mitotic checkpoint protein BUB3 OS=Homo sapiens OX=9606 GN=BUB3 PE=1 SV=1                                            | 0,017490479  | 0,096614 |
| Q8NB37  | Glutamine amidotransferase-like class 1 domain-containing protein 1 OS=Homo sapiens OX=9606 GN=GATD1 PE=1 SV=1       | 0,045120094  | 0,096502 |
| O95361  | Tripartite motif-containing protein 16 OS=Homo sapiens OX=9606 GN=TRIM16 PE=1 SV=3                                   | 0,044665288  | 0,095503 |
| P57772  | Selenocysteine-specific elongation factor OS=Homo sapiens OX=9606 GN=EEFSEK PE=1 SV=4                                | 0,065911895  | 0,094932 |
| P51572  | B-cell receptor-associated protein 31 OS=Homo sapiens OX=9606 GN=BCAP31 PE=1 SV=3                                    | -0,017083962 | 0,094299 |
| Q40926  | Malate dehydrogenase, mitochondrial OS=Homo sapiens OX=9606 GN=MDH2 PE=1 SV=3                                        | 0,012612505  | 0,094187 |
| Q9BRT2  | Ubiquinol-cytochrome-c reductase complex assembly factor 2 OS=Homo sapiens OX=9606 GN=UQC22 PE=1 SV=1                | 0,01392173   | 0,093859 |
| Q92629  | Delta-sarcoglycan OS=Homo sapiens OX=9606 GN=SGCD PE=1 SV=2                                                          | 0,032200669  | 0,093736 |
| Q969Q0  | 60S ribosomal protein L36A-like OS=Homo sapiens OX=9606 GN=RPL36AL PE=1 SV=3                                         | -0,03218051  | 0,093676 |
| P16333  | Cytoplasmic protein NCK1 OS=Homo sapiens OX=9606 GN=NCK1 PE=1 SV=1                                                   | -0,021179281 | 0,09367  |
| P11908  | Ribose-phosphate pyrophosphokinase 2 OS=Homo sapiens OX=9606 GN=PRPS2 PE=1 SV=2                                      | -0,014537474 | 0,093425 |
| Q9H0E2  | Toll-interacting protein OS=Homo sapiens OX=9606 GN=TOLLIP PE=1 SV=1                                                 | -0,02665893  | 0,093174 |
| P52209  | 6-phosphogluconate dehydrogenase, decarboxylating OS=Homo sapiens OX=9606 GN=PGD PE=1 SV=3                           | -0,010107503 | 0,092947 |
| P84085  | ADP-ribosylation factor 5 OS=Homo sapiens OX=9606 GN=ARF5 PE=1 SV=2                                                  | 0,020836591  | 0,092109 |
| O96033  | Molybdopterin synthase sulfur carrier subunit OS=Homo sapiens OX=9606 GN=MOC52 PE=1 SV=1                             | 0,031652758  | 0,092095 |
| Q15102  | Platelet-activating factor acetylhydrolase IB subunit gamma OS=Homo sapiens OX=9606 GN=PAFAH1B3 PE=1 SV=1            | -0,031546197 | 0,091777 |
| Q9UNN8  | Endothelial protein C receptor OS=Homo sapiens OX=9606 GN=PROCR PE=1 SV=1                                            | 0,031234015  | 0,090843 |
| Q9H9B4  | Sideroflexin-1 OS=Homo sapiens OX=9606 GN=SFNX1 PE=1 SV=4                                                            | -0,017529269 | 0,090715 |
| Q29R7   | Sister chromatid cohesion protein PDS5 homolog A OS=Homo sapiens OX=9606 GN=PDS5A PE=1 SV=1                          | 0,02591602   | 0,090503 |
| P09488  | Glutathione S-transferase Mu 1 OS=Homo sapiens OX=9606 GN=GSTM1 PE=1 SV=3                                            | 0,022496389  | 0,089602 |
| Q92696  | Geranylgeranyl transferase type-2 subunit alpha OS=Homo sapiens OX=9606 GN=RABGGTA PE=1 SV=2                         | 0,016231188  | 0,089454 |
| P78347  | General transcription factor II-I OS=Homo sapiens OX=9606 GN=GTF2I PE=1 SV=2                                         | 0,011993056  | 0,089425 |
| Q9H1I8  | Activating signal integrator 1 complex subunit 2 OS=Homo sapiens OX=9606 GN=ASCC2 PE=1 SV=3                          | 0,025553513  | 0,089201 |
| Q99720  | Sigma non-opioid intracellular receptor 1 OS=Homo sapiens OX=9606 GN=SIGMAR1 PE=1 SV=1                               | -0,086063112 | 0,08917  |
| O95819  | Mitogen-activated protein kinase kinase kinase 4 OS=Homo sapiens OX=9606 GN=MAP4K4 PE=1 SV=2                         | -0,011233728 | 0,089007 |
| P12109  | Collagen alpha-1(VI) chain OS=Homo sapiens OX=9606 GN=COL6A1 PE=1 SV=3                                               | -0,007468745 | 0,088952 |
| Q6PJ77  | Zinc finger CCH domain-containing protein 14 OS=Homo sapiens OX=9606 GN=CZCH14 PE=1 SV=1                             | -0,030558419 | 0,088823 |
| O95487  | Protein transport protein Sec24B OS=Homo sapiens OX=9606 GN=SEC24B PE=1 SV=2                                         | -0,015976119 | 0,088008 |
| P48729  | Casein kinase I isoform alpha OS=Homo sapiens OX=9606 GN=CSNK1A1 PE=1 SV=2                                           | 0,02199888   | 0,087564 |
| L0R6Q1  | SLC35A4 upstream open reading frame protein OS=Homo sapiens OX=9606 GN=SLC35A4 PE=3 SV=1                             | -0,041024934 | 0,087526 |
| Q96566  | Chloride channel CLIC-like protein 1 OS=Homo sapiens OX=9606 GN=CLCC1 PE=1 SV=1                                      | 0,018138579  | 0,087189 |
| Q72417  | LIM and senescent cell antigen-like-containing domain protein 2 OS=Homo sapiens OX=9606 GN=LIMS2 PE=1 SV=1           | 0,021764927  | 0,086607 |
| P05455  | Lupus La protein OS=Homo sapiens OX=9606 GN=SSB PE=1 SV=2                                                            | 0,010347187  | 0,086482 |
| Q8NB14  | Golgi membrane protein 1 OS=Homo sapiens OX=9606 GN=GOLM1 PE=1 SV=1                                                  | -0,02474068  | 0,086285 |
| Q96FW1  | Ubiquitin thioesterase OTUB1 OS=Homo sapiens OX=9606 GN=OTUB1 PE=1 SV=2                                              | -0,012807988 | 0,085862 |
| Q9Y223  | Bifunctional UDP-N-acetylglucosamine 2-epimerase/N-acetylmannosamine kinase OS=Homo sapiens OX=9606 GN=GNE PE=1 SV=1 | -0,016459878 | 0,085027 |
| Q9Y6M9  | NADH dehydrogenase [ubiquinone] 1 beta subcomplex subunit 9 OS=Homo sapiens OX=9606 GN=NDUF9 PE=1 SV=3               | 0,074352355  | 0,084342 |
| Q9HA72  | Calcium homeostasis modulator protein 2 OS=Homo sapiens OX=9606 GN=CALHM2 PE=2 SV=1                                  | -0,039449549 | 0,084083 |
| P23526  | Adenosylhomocysteinase OS=Homo sapiens OX=9606 GN=AHCY PE=1 SV=4                                                     | -0,012054166 | 0,083706 |
| O15121  | Sphenolipid delta(4)-desaturase DES1 OS=Homo sapiens OX=9606 GN=DEGS1 PE=1 SV=1                                      | 0,039209349  | 0,083559 |
| Q96QC0  | Serine/threonine-protein phosphatase 1 regulatory subunit 10 OS=Homo sapiens OX=9606 GN=PPP1R10 PE=1 SV=1            | 0,039119738  | 0,083363 |
| P75592  | E3 ubiquitin-protein ligase MYCBP2 OS=Homo sapiens OX=9606 GN=MYCBP2 PE=1 SV=4                                       | -0,038609935 | 0,082251 |
| P30613  | Pyruvate kinase PKLR OS=Homo sapiens OX=9606 GN=PKLR PE=1 SV=2                                                       | 0,025660145  | 0,082228 |
| Q9ULH1  | Arf-GAP with SH3 domain, ANK repeat and PH domain-containing protein 1 OS=Homo sapiens OX=9606 GN=ASAP1 PE=1 SV=4    | -0,023592927 | 0,082177 |
| Q15370  | Elongin-B OS=Homo sapiens OX=9606 GN=ELOB PE=1 SV=1                                                                  | -0,017108548 | 0,082105 |
| Q00765  | Receptor expression-enhancing protein 5 OS=Homo sapiens OX=9606 GN=REEP5 PE=1 SV=3                                   | -0,017057365 | 0,081853 |
| Q3KQV9  | UDP-N-acetylhexosamine pyrophosphorylase-like protein 1 OS=Homo sapiens OX=9606 GN=UAP1L1 PE=1 SV=2                  | -0,020548749 | 0,081639 |
| P48507  | Glutamate--cysteine ligase regulatory subunit OS=Homo sapiens OX=9606 GN=GCLM PE=1 SV=1                              | 0,018386966  | 0,080995 |
| P29992  | Guanine nucleotide-binding protein subunit alpha-11 OS=Homo sapiens OX=9606 GN=GNA11 PE=1 SV=2                       | 0,013900703  | 0,080811 |
| Q9NZB2  | Constitutive coactivator of PPAR-gamma-like protein 1 OS=Homo sapiens OX=9606 GN=FAM120A PE=1 SV=2                   | -0,00811365  | 0,080395 |
| Q8N4B5  | Proline-rich protein 18 OS=Homo sapiens OX=9606 GN=PRR18 PE=2 SV=2                                                   | -0,050336529 | 0,079948 |
| Q99541  | Piripilin-2 OS=Homo sapiens OX=9606 GN=PLIN2 PE=1 SV=2                                                               | 0,037482883  | 0,079794 |
| O43747  | AP-1 complex subunit gamma-1 OS=Homo sapiens OX=9606 GN=AP1G1 PE=1 SV=5                                              | -0,009566402 | 0,079784 |
| P49841  | Glycogen synthase kinase-3 beta OS=Homo sapiens OX=9606 GN=GSK3B PE=1 SV=2                                           | -0,027509467 | 0,079739 |
| P47985  | Cytochrome b-c1 complex subunit Rieske, mitochondrial OS=Homo sapiens OX=9606 GN=UQCRCF1 PE=1 SV=2                   | -0,013035405 | 0,079672 |
| P00441  | Superoxide dismutase [Cu-Zn] OS=Homo sapiens OX=9606 GN=SOD1 PE=1 SV=2                                               | -0,020054281 | 0,079624 |
| P62873  | Guanine nucleotide-binding protein G(I)/G(S)/G(T) subunit beta-1 OS=Homo sapiens OX=9606 GN=GNB1 PE=1 SV=3           | -0,014481175 | 0,079557 |
| P10768  | S-formylglutathione hydrolase OS=Homo sapiens OX=9606 GN=ESD PE=1 SV=2                                               | 0,011468387  | 0,079531 |
| Q14166  | Tubulin--tyrosine ligase-like protein 12 OS=Homo sapiens OX=9606 GN=TLL12 PE=1 SV=2                                  | 0,011019053  | 0,079197 |
| Q96MWS1 | Coiled-coil domain-containing protein 43 OS=Homo sapiens OX=9606 GN=CDC43 PE=1 SV=2                                  | 0,027324483  | 0,079189 |
| Q96J17  | Protein disulfide-isomerase TMX3 OS=Homo sapiens OX=9606 GN=TMX3 PE=1 SV=1                                           | 0,011386591  | 0,078949 |
| Q75940  | Survival of motor neuron-related-splicing factor 30 OS=Homo sapiens OX=9606 GN=SMNDC1 PE=1 SV=1                      | -0,027194828 | 0,078804 |
| Q727A4  | PX domain-containing protein kinase-like protein OS=Homo sapiens OX=9606 GN=PKX PE=1 SV=1                            | -0,027172081 | 0,078737 |
| Q96EP0  | E3 ubiquitin-protein ligase RNF31 OS=Homo sapiens OX=9606 GN=RNF31 PE=1 SV=1                                         | -0,028274568 | 0,078209 |
| Q9Y262  | Eukaryotic translation initiation factor 3 subunit L OS=Homo sapiens OX=9606 GN=EIF3L PE=1 SV=1                      | -0,007891955 | 0,078142 |
| Q99996  | A-kinase anchor protein 9 OS=Homo sapiens OX=9606 GN=AKAP9 PE=1 SV=4                                                 | -0,036300401 | 0,077722 |
| Q9P210  | Cleavage and polyadenylation specificity factor subunit 2 OS=Homo sapiens OX=9606 GN=CPSF2 PE=1 SV=2                 | -0,036251621 | 0,077114 |
| Q96A74  | Tetrapeptide repeat protein 28 OS=Homo sapiens OX=9606 GN=TT28 PE=1 SV=4                                             | 0,15335642   | 0,075826 |
| Q5VW32  | BRO1 domain-containing protein BROX OS=Homo sapiens OX=9606 GN=BROX PE=1 SV=1                                        | -0,021737375 | 0,075543 |
| Q9P0V3  | SH3 domain-binding protein 4 OS=Homo sapiens OX=9606 GN=SH3BP4 PE=1 SV=1                                             | -0,009696067 | 0,074236 |
| P55265  | Double-stranded RNA-specific adenosine deaminase OS=Homo sapiens OX=9606 GN=ADAR PE=1 SV=4                           | 0,01071327   | 0,074166 |
| P61964  | WD repeat-containing protein 5 OS=Homo sapiens OX=9606 GN=WDR5 PE=1 SV=1                                             | -0,055989667 | 0,074065 |
| Q9NYL2  | Mitogen-activated protein kinase kinase kinase 20 OS=Homo sapiens OX=9606 GN=MAP3K20 PE=1 SV=3                       | -0,034745034 | 0,073884 |
| Q8NE22  | Vacuolar protein sorting-associated protein 37A OS=Homo sapiens OX=9606 GN=VPS37A PE=1 SV=1                          | 0,01659031   | 0,072892 |
| Q96PZ0  | Pseudouridylate synthase 7 homolog OS=Homo sapiens OX=9606 GN=PUS7 PE=1 SV=2                                         | 0,031613458  | 0,072741 |
| Q8WV99  | AN1-type zinc finger protein 2B OS=Homo sapiens OX=9606 GN=ZFAND2B PE=1 SV=1                                         | -0,033112202 | 0,070297 |
| P29144  | Tripeptidyl-peptidase 2 OS=Homo sapiens OX=9606 GN=TPP2 PE=1 SV=4                                                    | 0,008024447  | 0,070057 |
| Q9UKJ9  | ADP-sugar pyrophosphatase OS=Homo sapiens OX=9606 GN=NUDT5 PE=1 SV=1                                                 | 0,015950424  | 0,070015 |
| Q9UH7   | Enolase-phosphatase E1 OS=Homo sapiens OX=9606 GN=ENOPH1 PE=1 SV=1                                                   | -0,024175726 | 0,069861 |
| Q14697  | Neutral alpha-glucosidase AB OS=Homo sapiens OX=9606 GN=GANAB PE=1 SV=3                                              | -0,005421195 | 0,069618 |
| Q08722  | Leukocyte surface antigen CD47 OS=Homo sapiens OX=9606 GN=CD47 PE=1 SV=1                                             | 0,024081273  | 0,069582 |
| Q14978  | Nucleolar and coiled-body phosphoprotein 1 OS=Homo sapiens OX=9606 GN=NOLC1 PE=1 SV=2                                | -0,03272938  | 0,069454 |
| Q96BM9  | #N/D                                                                                                                 | -0,017461761 | 0,069098 |
| Q5SW79  | Centrosomal protein of 170 kDa OS=Homo sapiens OX=9606 GN=CEP170 PE=1 SV=1                                           | 0,009631865  | 0,068999 |
| P05230  | Fibroblast growth factor 1 OS=Homo sapiens OX=9606 GN=FGF1 PE=1 SV=1                                                 | 0,019864349  | 0,0689   |
| Q92614  | Unconventional myosin-XVIIIa OS=Homo sapiens OX=9606 GN=MYO18A PE=1 SV=3                                             | 0,023722901  | 0,068524 |
| Q13347  | Eukaryotic translation initiation factor 3 subunit I OS=Homo sapiens OX=9606 GN=EIF3I PE=1 SV=1                      | 0,009243854  | 0,06846  |
| Q9NRX5  | Serine incorporator 1 OS=Homo sapiens OX=9606 GN=SERINC1 PE=1 SV=1                                                   | 0,032240666  | 0,068409 |
| Q93034  | Cullin-5 OS=Homo sapiens OX=9606 GN=CUL5 PE=1 SV=4                                                                   | -0,011055687 | 0,067302 |
| Q14566  | DNA replication licensing factor MCM6 OS=Homo sapiens OX=9606 GN=MCM6 PE=1 SV=1                                      | -0,009387647 | 0,06721  |
| Q96GK7  | Fumarylacetoacetate hydrolase domain-containing protein 2A OS=Homo sapiens OX=9606 GN=FAHD2A PE=1 SV=1               | -0,023269114 | 0,067185 |
| Q9BW62  | Katanin p60 ATPase-containing subunit A-like 1 OS=Homo sapiens OX=9606 GN=KATNAL1 PE=1 SV=1                          | 0,025555618  | 0,067005 |
| Q95210  | Starch-binding domain-containing protein 1 OS=Homo sapiens OX=9606 GN=STBD1 PE=1 SV=1                                | 0,019317935  | 0,066963 |
| Q95104  | SR-related and CTD-associated factor 4 OS=Homo sapiens OX=9606 GN=SCAF4 PE=1 SV=3                                    | 0,031554563  | 0,066924 |
| Q9NUQ8  | ATP-binding cassette sub-family F member 3 OS=Homo sapiens OX=9606 GN=ABCF3 PE=1 SV=2                                | -0,014006916 | 0,066892 |

|         |                                                                                                                     |              |          |
|---------|---------------------------------------------------------------------------------------------------------------------|--------------|----------|
| Q5J5Z5  | Protein PRRC2B OS=Homo sapiens OX=9606 GN=PRRC2B PE=1 SV=2                                                          | -0,02311691  | 0,066736 |
| P17980  | 26S proteasome regulatory subunit 6A OS=Homo sapiens OX=9606 GN=PSM3C PE=1 SV=3                                     | 0,008025321  | 0,066646 |
| Q86S22  | Trafficking protein particle complex subunit 6B OS=Homo sapiens OX=9606 GN=TRAPP6B PE=1 SV=1                        | 0,022914569  | 0,06614  |
| Q9Y333  | U6 snRNA-associated Sm-like protein Lsm2 OS=Homo sapiens OX=9606 GN=LSM2 PE=1 SV=1                                  | 0,022861932  | 0,065985 |
| P50613  | Cyclin-dependent kinase 7 OS=Homo sapiens OX=9606 GN=CDK7 PE=1 SV=1                                                 | -0,031050032 | 0,065833 |
| Q9UKX7  | Nuclear pore complex protein Nup50 OS=Homo sapiens OX=9606 GN=NUP50 PE=1 SV=2                                       | -0,016465547 | 0,065072 |
| Q99439  | Calponin-2 OS=Homo sapiens OX=9606 GN=CNN2 PE=1 SV=4                                                                | -0,009069188 | 0,064881 |
| Q96A49  | Synapse-associated protein 1 OS=Homo sapiens OX=9606 GN=SYAP1 PE=1 SV=1                                             | 0,012559383  | 0,064449 |
| Q7L0V3  | tRNA methyltransferase 10 homolog C OS=Homo sapiens OX=9606 GN=TRMT10C PE=1 SV=2                                    | 0,018427657  | 0,063813 |
| P14317  | Hematopoietic lineage cell-specific protein OS=Homo sapiens OX=9606 GN=HCLS1 PE=1 SV=3                              | -0,016612923 | 0,063713 |
| Q9UBB5  | Methyl-CpG-binding domain protein 2 OS=Homo sapiens OX=9606 GN=MBD2 PE=1 SV=1                                       | -0,010515636 | 0,06334  |
| O00483  | Cytochrome c oxidase subunit NDUFA4 OS=Homo sapiens OX=9606 GN=NDUFA4 PE=1 SV=1                                     | -0,029842496 | 0,063224 |
| P14406  | Cytochrome c oxidase subunit 7A2, mitochondrial OS=Homo sapiens OX=9606 GN=COX7A2 PE=1 SV=1                         | 0,029643498  | 0,062794 |
| Q96K17  | Transcription factor BTF3 homolog 4 OS=Homo sapiens OX=9606 GN=BTF3L4 PE=1 SV=1                                     | 0,018137964  | 0,062789 |
| Q9Y673  | Dolichyl-phosphate beta-glucosyltransferase OS=Homo sapiens OX=9606 GN=ALG5 PE=1 SV=1                               | -0,02162783  | 0,062351 |
| Q9Y4E1  | #N/D                                                                                                                | 0,008697849  | 0,062169 |
| Q5VTR2  | E3 ubiquitin-protein ligase BRE1A OS=Homo sapiens OX=9606 GN=RNF20 PE=1 SV=2                                        | -0,02930302  | 0,062059 |
| Q9Y3D0  | Cytosolic iron-sulfur assembly component 2B OS=Homo sapiens OX=9606 GN=CIA2B PE=1 SV=1                              | -0,029249973 | 0,061945 |
| P60842  | Eukaryotic initiation factor 4A-I OS=Homo sapiens OX=9606 GN=EIF4A1 PE=1 SV=1                                       | -0,006061797 | 0,061837 |
| Q99584  | Protein S100-A13 OS=Homo sapiens OX=9606 GN=S100A13 PE=1 SV=1                                                       | 0,017853668  | 0,061785 |
| Q9ULW0  | Targeting protein for Xklp2 OS=Homo sapiens OX=9606 GN=TPX2 PE=1 SV=2                                               | -0,029011225 | 0,06143  |
| P49023  | Paxillin OS=Homo sapiens OX=9606 GN=PXN PE=1 SV=3                                                                   | 0,008573409  | 0,061261 |
| P55854  | Small ubiquitin-related modifier 3 OS=Homo sapiens OX=9606 GN=SUMO3 PE=1 SV=2                                       | 0,028744303  | 0,060854 |
| Q95197  | Reticulon-3 OS=Homo sapiens OX=9606 GN=RTN3 PE=1 SV=2                                                               | -0,021082308 | 0,060748 |
| Q9BZK7  | F-box-like/WD repeat-containing protein TBL1XR1 OS=Homo sapiens OX=9606 GN=TBL1XR1 PE=1 SV=1                        | 0,0108884    | 0,05943  |
| Q9UBC5  | Unconventional myosin-Ia OS=Homo sapiens OX=9606 GN=MYO1A PE=1 SV=1                                                 | 0,015064456  | 0,059426 |
| Q92791  | Endoplasmic reticulum protein SC65 OS=Homo sapiens OX=9606 GN=P3H4 PE=1 SV=1                                        | 0,008938276  | 0,059242 |
| Q9Y2X7  | ARF GTPase-activating protein GIT1 OS=Homo sapiens OX=9606 GN=GIT1 PE=1 SV=2                                        | -0,017920732 | 0,059084 |
| Q9NRW1  | #N/D                                                                                                                | 0,02051528   | 0,059083 |
| Q96KC8  | Dnaj homolog subfamily C member 1 OS=Homo sapiens OX=9606 GN=DNAJC1 PE=1 SV=1                                       | 0,011515765  | 0,058989 |
| P05109  | Protein S100-A8 OS=Homo sapiens OX=9606 GN=S100A8 PE=1 SV=1                                                         | -0,027838577 | 0,058902 |
| P35555  | Fibrillin-1 OS=Homo sapiens OX=9606 GN=FBN1 PE=1 SV=4                                                               | -0,004201424 | 0,058736 |
| Q9P2E3  | NF1-type zinc finger-containing protein 1 OS=Homo sapiens OX=9606 GN=ZNF1 PE=2 SV=2                                 | 0,040328769  | 0,058623 |
| Q9BU23  | Lipase maturation factor 2 OS=Homo sapiens OX=9606 GN=LMF2 PE=1 SV=2                                                | -0,009589719 | 0,058204 |
| Q96FZ7  | Charged multivesicular body protein 6 OS=Homo sapiens OX=9606 GN=CHMP6 PE=1 SV=3                                    | -0,027464792 | 0,058097 |
| Q9Y411  | Unconventional myosin-Va OS=Homo sapiens OX=9606 GN=MYO5A PE=1 SV=2                                                 | -0,010044328 | 0,057961 |
| Q9HCN8  | Stromal cell-derived factor 2-like protein 1 OS=Homo sapiens OX=9606 GN=SDFL2L1 PE=1 SV=2                           | 0,027059447  | 0,057225 |
| Q99661  | Kinesin-like protein KIF2C OS=Homo sapiens OX=9606 GN=KIF2C PE=1 SV=2                                               | -0,03121503  | 0,057197 |
| O15031  | Plexin-B2 OS=Homo sapiens OX=9606 GN=PLXNB2 PE=1 SV=3                                                               | -0,007494596 | 0,05706  |
| O43818  | U3 small nuclear RNA-interacting protein 2 OS=Homo sapiens OX=9606 GN=RRP9 PE=1 SV=1                                | -0,019744347 | 0,056822 |
| O15427  | Monocarboxylate transporter 4 OS=Homo sapiens OX=9606 GN=SLC16A3 PE=1 SV=1                                          | 0,012950722  | 0,056601 |
| Q5CZ79  | Ankyrin repeat domain-containing protein 20B OS=Homo sapiens OX=9606 GN=ANKRD20A8 PE=2 SV=2                         | -0,110277957 | 0,056101 |
| P61962  | DBP1- and CUL4-associated factor 7 OS=Homo sapiens OX=9606 GN=DCAF7 PE=1 SV=1                                       | -0,019217373 | 0,055454 |
| O75534  | Cold shock domain-containing protein E1 OS=Homo sapiens OX=9606 GN=CSDE1 PE=1 SV=2                                  | 0,005783994  | 0,054724 |
| O75153  | Clustered mitochondria protein homolog OS=Homo sapiens OX=9606 GN=CLUH PE=1 SV=2                                    | -0,015827065 | 0,054646 |
| Q8N3J4  | Cohesin subunit SA-2 OS=Homo sapiens OX=9606 GN=STAG2 PE=1 SV=3                                                     | 0,105501658  | 0,054551 |
| Q86VI3  | Ras GTPase-activating-like protein IQGAP3 OS=Homo sapiens OX=9606 GN=IQGAP3 PE=1 SV=2                               | -0,012464713 | 0,054439 |
| Q8NB05  | ATPase family AAA domain-containing protein 1 OS=Homo sapiens OX=9606 GN=ATAD1 PE=1 SV=1                            | -0,018890653 | 0,054321 |
| P62491  | Ras-related protein Rab-11A OS=Homo sapiens OX=9606 GN=RAB11A PE=1 SV=3                                             | -0,008193929 | 0,054219 |
| P46736  | Lys-63-specific deubiquitinase BRCC36 OS=Homo sapiens OX=9606 GN=BRCC3 PE=1 SV=2                                    | 0,015681893  | 0,054136 |
| P31943  | Heterogeneous nuclear ribonucleoprotein H OS=Homo sapiens OX=9606 GN=HNRNPH1 PE=1 SV=4                              | -0,007867263 | 0,054107 |
| Q96CW1  | AP-2 complex subunit mu OS=Homo sapiens OX=9606 GN=AP2M1 PE=1 SV=2                                                  | -0,006704669 | 0,054004 |
| P00505  | Aspartate aminotransferase, mitochondrial OS=Homo sapiens OX=9606 GN=GOT2 PE=1 SV=3                                 | -0,010505445 | 0,05372  |
| Q9H1E3  | Nuclear ubiquitinous casein and cyclin-dependent kinase substrate 1 OS=Homo sapiens OX=9606 GN=NUCKS1 PE=1 SV=1     | 0,018584572  | 0,053426 |
| Q6ZW31  | Rho GTPase-activating protein SYDE1 OS=Homo sapiens OX=9606 GN=SYDE1 PE=1 SV=1                                      | 0,025147334  | 0,053115 |
| P13797  | Plasmin-3 OS=Homo sapiens OX=9606 GN=PLS3 PE=1 SV=4                                                                 | 0,004468966  | 0,052597 |
| Q4V328  | GRIP1-associated protein 1 OS=Homo sapiens OX=9606 GN=GRIPAP1 PE=1 SV=2                                             | -0,012039347 | 0,052548 |
| Q96SL4  | Glutathione peroxidase 7 OS=Homo sapiens OX=9606 GN=GPX7 PE=1 SV=1                                                  | -0,011990269 | 0,052323 |
| Q86S0Q  | Plectrokinin homology-like domain family B member 2 OS=Homo sapiens OX=9606 GN=PHLDB2 PE=1 SV=2                     | 0,018191087  | 0,052276 |
| Q9H1K1  | Iron-sulfur cluster assembly enzyme ISCU, mitochondrial OS=Homo sapiens OX=9606 GN=ISCU PE=1 SV=2                   | 0,024715791  | 0,052189 |
| O60437  | Periplakin OS=Homo sapiens OX=9606 GN=PPL PE=1 SV=4                                                                 | 0,011909782  | 0,052028 |
| Q9Y383  | Putative RNA-binding protein Luc7-like 2 OS=Homo sapiens OX=9606 GN=LUC7L2 PE=1 SV=2                                | 0,010916017  | 0,051876 |
| P61457  | Pterin-4-alpha-carbinolamine dehydratase OS=Homo sapiens OX=9606 GN=PCBD1 PE=1 SV=2                                 | -0,024506047 | 0,051739 |
| O60831  | PRA1 family protein 2 OS=Homo sapiens OX=9606 GN=PRAF2 PE=1 SV=1                                                    | 0,017970713  | 0,051632 |
| Q96IU4  | Protein ABHD14B OS=Homo sapiens OX=9606 GN=ABHD14B PE=1 SV=1                                                        | 0,01176048   | 0,05131  |
| O14773  | Tripeptidyl-peptidase 1 OS=Homo sapiens OX=9606 GN=TPP1 PE=1 SV=2                                                   | -0,017820673 | 0,051193 |
| P46060  | Ran GTPase-activating protein 1 OS=Homo sapiens OX=9606 GN=RANGAP1 PE=1 SV=1                                        | -0,006158671 | 0,05088  |
| Q101658 | Protein Dr1 OS=Homo sapiens OX=9606 GN=DR1 PE=1 SV=1                                                                | 0,014483851  | 0,049932 |
| O15145  | Actin-related protein 2/3 complex subunit 3 OS=Homo sapiens OX=9606 GN=ARPC3 PE=1 SV=3                              | -0,010512595 | 0,049927 |
| Q6YHK3  | CD109 antigen OS=Homo sapiens OX=9606 GN=CD109 PE=1 SV=2                                                            | -0,006570353 | 0,049905 |
| Q9Y3B9  | RRP15-like protein OS=Homo sapiens OX=9606 GN=RRP15 PE=1 SV=2                                                       | -0,026136649 | 0,049699 |
| Q9Y2E4  | Disco-interacting protein 2 homolog C OS=Homo sapiens OX=9606 GN=DIP2C PE=1 SV=2                                    | -0,034806013 | 0,049401 |
| Q05932  | Folypolylglutamate synthase, mitochondrial OS=Homo sapiens OX=9606 GN=FPGS PE=1 SV=3                                | 0,01302333   | 0,049228 |
| Q9BRP8  | Partner of Y14 and mago OS=Homo sapiens OX=9606 GN=PYM1 PE=1 SV=1                                                   | 0,011266216  | 0,049119 |
| P42356  | Phosphatidylinositol 4-kinase alpha OS=Homo sapiens OX=9606 GN=PI4KA PE=1 SV=4                                      | -0,016942704 | 0,048631 |
| Q9NQ48  | Leucine zipper transcription factor-like protein 1 OS=Homo sapiens OX=9606 GN=LZTF1L PE=1 SV=1                      | 0,014016286  | 0,048294 |
| Q9NRW7  | Vacuolar protein sorting-associated protein 45 OS=Homo sapiens OX=9606 GN=VPS45 PE=1 SV=1                           | -0,007948833 | 0,048084 |
| O43670  | BUB3-interacting and GLEBS motif-containing protein ZNF207 OS=Homo sapiens OX=9606 GN=ZNF207 PE=1 SV=1              | -0,016087595 | 0,046139 |
| Q8HWU6  | Extracellular sulfatase Sulf-1 OS=Homo sapiens OX=9606 GN=SULF1 PE=1 SV=1                                           | 0,011615528  | 0,045614 |
| Q96EY7  | Pentatricopeptide repeat domain-containing protein 3, mitochondrial OS=Homo sapiens OX=9606 GN=PTCD3 PE=1 SV=3      | 0,015900408  | 0,045595 |
| P33527  | Multidrug resistance-associated protein 1 OS=Homo sapiens OX=9606 GN=ABCC1 PE=1 SV=3                                | 0,005778254  | 0,045131 |
| Q8IVM0  | Coiled-coil domain-containing protein 50 OS=Homo sapiens OX=9606 GN=CCDC50 PE=1 SV=1                                | -0,007747228 | 0,045057 |
| P18031  | Tyrosine-protein phosphatase non-receptor type 1 OS=Homo sapiens OX=9606 GN=PTPN1 PE=1 SV=1                         | 0,008729322  | 0,044502 |
| P38159  | RNA-binding motif protein, X chromosome OS=Homo sapiens OX=9606 GN=RBMX PE=1 SV=3                                   | -0,006452791 | 0,044234 |
| Q9Y676  | 28S ribosomal protein S18b, mitochondrial OS=Homo sapiens OX=9606 GN=MRRPS18B PE=1 SV=1                             | 0,020969898  | 0,04417  |
| Q5VY43  | Platelet endothelial aggregation receptor 1 OS=Homo sapiens OX=9606 GN=PEAR1 PE=1 SV=1                              | 0,012455829  | 0,042841 |
| P43155  | Carnitine O-acetyltransferase OS=Homo sapiens OX=9606 GN=CRAT PE=1 SV=5                                             | -0,024920057 | 0,042466 |
| P22087  | rRNA 2'-O-methyltransferase fibrillarin OS=Homo sapiens OX=9606 GN=FBL PE=1 SV=2                                    | 0,009716375  | 0,042266 |
| P84022  | Mothers against decapentaplegic homolog 3 OS=Homo sapiens OX=9606 GN=SMAD3 PE=1 SV=1                                | 0,020041731  | 0,042188 |
| O95671  | Probable bifunctional dTTP/UTP pyrophosphatase/methyltransferase protein OS=Homo sapiens OX=9606 GN=ASMTL PE=1 SV=3 | 0,008213292  | 0,041835 |
| Q9H0A8  | COMM domain-containing protein 4 OS=Homo sapiens OX=9606 GN=COMM4 PE=1 SV=1                                         | 0,010634513  | 0,041708 |
| Q14435  | Polypectide N-acetylgalactosaminyltransferase 3 OS=Homo sapiens OX=9606 GN=GALNT3 PE=1 SV=2                         | -0,021591086 | 0,040742 |
| Q9NVX2  | Notchless protein homolog 1 OS=Homo sapiens OX=9606 GN=NLE1 PE=1 SV=4                                               | 0,019145384  | 0,040277 |
| Q13618  | Cullin-3 OS=Homo sapiens OX=9606 GN=CUL3 PE=1 SV=2                                                                  | -0,007000491 | 0,040159 |
| P08236  | Beta-glucuronidase OS=Homo sapiens OX=9606 GN=GUSB PE=1 SV=2                                                        | 0,008745144  | 0,039875 |
| Q15233  | Non-POU domain-containing octamer-binding protein OS=Homo sapiens OX=9606 GN=NONO PE=1 SV=4                         | 0,005205037  | 0,039396 |
| Q9UNX4  | WD repeat-containing protein 3 OS=Homo sapiens OX=9606 GN=WDR3 PE=1 SV=1                                            | -0,018610454 | 0,039138 |
| Q6VY07  | Phosphofurin acidic cluster sorting protein 1 OS=Homo sapiens OX=9606 GN=PACS1 PE=1 SV=2                            | 0,008911152  | 0,038717 |

|        |                                                                                                                                 |      |              |          |
|--------|---------------------------------------------------------------------------------------------------------------------------------|------|--------------|----------|
| Q0ZGT2 | Nexilin OS=Homo sapiens OX=9606 GN=NEXN PE=1 SV=1                                                                               |      | -0,005447859 | 0,038637 |
| Q04759 |                                                                                                                                 | #N/D | -0,010856596 | 0,038493 |
| Q72434 | Mitochondrial antiviral-signaling protein OS=Homo sapiens OX=9606 GN=MAVS PE=1 SV=2                                             |      | 0,007000338  | 0,037938 |
| P05166 | Propionyl-CoA carboxylase beta chain, mitochondrial OS=Homo sapiens OX=9606 GN=PCCB PE=1 SV=3                                   |      | -0,01792214  | 0,037673 |
| Q92878 | DNA repair protein RAD50 OS=Homo sapiens OX=9606 GN=RAD50 PE=1 SV=1                                                             |      | -0,010776931 | 0,036995 |
| Q96EP5 | DAZ-associated protein 1 OS=Homo sapiens OX=9606 GN=DAZAP1 PE=1 SV=1                                                            |      | 0,009311298  | 0,036455 |
| Q16698 | 2,4-dienoyl-CoA reductase, mitochondrial OS=Homo sapiens OX=9606 GN=DECR1 PE=1 SV=1                                             |      | 0,00621701   | 0,03561  |
| P61020 | Ras-related protein Rab-5B OS=Homo sapiens OX=9606 GN=RAB5B PE=1 SV=1                                                           |      | -0,012260066 | 0,035035 |
| Q03519 | Antigen peptide transporter 2 OS=Homo sapiens OX=9606 GN=TAP2 PE=1 SV=1                                                         |      | 0,012256238  | 0,035024 |
| Q06033 | Inter-alpha-trypsin inhibitor heavy chain H3 OS=Homo sapiens OX=9606 GN=ITH3 PE=1 SV=2                                          |      | 0,012105844  | 0,034589 |
| Q9H9E3 | Conserved oligomeric Golgi complex subunit 4 OS=Homo sapiens OX=9606 GN=COG4 PE=1 SV=3                                          |      | -0,009908275 | 0,033979 |
| Q13155 | Aminoacyl tRNA synthase complex-interacting multifunctional protein 2 OS=Homo sapiens OX=9606 GN=AIMP2 PE=1 SV=2                |      | 0,007066057  | 0,033375 |
| O15116 | U6 snRNA-associated Sm-like protein LSM1 OS=Homo sapiens OX=9606 GN=LSM1 PE=1 SV=1                                              |      | -0,011666832 | 0,033321 |
| Q15041 | ADP-ribosylation factor-like protein 6-interacting protein 1 OS=Homo sapiens OX=9606 GN=ARL6IP1 PE=1 SV=2                       |      | 0,015797424  | 0,033159 |
| P49643 | DNA primase large subunit OS=Homo sapiens OX=9606 GN=PRIM2 PE=1 SV=2                                                            |      | 0,015701341  | 0,032955 |
| P42574 | Caspase-3 OS=Homo sapiens OX=9606 GN=CASP3 PE=1 SV=2                                                                            |      | -0,006971697 | 0,032924 |
| Q32P44 | Echinoderm microtubule-associated protein-like 3 OS=Homo sapiens OX=9606 GN=EML3 PE=1 SV=1                                      |      | 0,011512427  | 0,032875 |
| Q9BRJ2 | 39S ribosomal protein L45, mitochondrial OS=Homo sapiens OX=9606 GN=MRPL45 PE=1 SV=2                                            |      | -0,021117462 | 0,032605 |
| Q8N1F7 | Nuclear pore complex protein Nup93 OS=Homo sapiens OX=9606 GN=NUP93 PE=1 SV=2                                                   |      | -0,004592359 | 0,032505 |
| O43837 | Isochorate dehydrogenase [NAD] subunit beta, mitochondrial OS=Homo sapiens OX=9606 GN=IDH3B PE=1 SV=2                           |      | 0,007373648  | 0,031965 |
| Q13619 | Cullin-4A OS=Homo sapiens OX=9606 GN=CUL4A PE=1 SV=3                                                                            |      | -0,005855476 | 0,031667 |
| Q14919 | Dr1-associated corepressor OS=Homo sapiens OX=9606 GN=DRAP1 PE=1 SV=3                                                           |      | -0,009087401 | 0,031134 |
| Q9YSKS | Ubiquitin carboxyl-terminal hydrolase isozyme L5 OS=Homo sapiens OX=9606 GN=UCHL5 PE=1 SV=3                                     |      | -0,008745729 | 0,029952 |
| P63104 | 14-3-3 protein zeta/delta OS=Homo sapiens OX=9606 GN=YWHAZ PE=1 SV=1                                                            |      | -0,003626286 | 0,029747 |
| Q92759 | General transcription factor IIH subunit 4 OS=Homo sapiens OX=9606 GN=GTF2H4 PE=1 SV=1                                          |      | 0,01418136   | 0,029734 |
| Q96JC1 | Vam6/Vps39-like protein OS=Homo sapiens OX=9606 GN=VPS39 PE=1 SV=2                                                              |      | 0,010339552  | 0,029493 |
| O00399 | Dynactin subunit 6 OS=Homo sapiens OX=9606 GN=DCTN6 PE=1 SV=1                                                                   |      | -0,010314198 | 0,02942  |
| Q9Y6I9 | Testis-expressed protein 264 OS=Homo sapiens OX=9606 GN=TEX264 PE=1 SV=1                                                        |      | 0,010145993  | 0,028935 |
| Q14376 | UDP-glucose 4-epimerase OS=Homo sapiens OX=9606 GN=GALE PE=1 SV=2                                                               |      | 0,010892072  | 0,028761 |
| P09382 | Galectin-1 OS=Homo sapiens OX=9606 GN=LGALS1 PE=1 SV=2                                                                          |      | 0,004784067  | 0,028753 |
| A6NIH7 | Protein unc-119 homolog B OS=Homo sapiens OX=9606 GN=UNC119B PE=1 SV=1                                                          |      | 0,013673376  | 0,028659 |
| Q00403 | Transcription initiation factor IIb OS=Homo sapiens OX=9606 GN=GTF2B PE=1 SV=1                                                  |      | 0,009936058  | 0,028331 |
| P49792 | E3 SUMO-protein ligase RanBP2 OS=Homo sapiens OX=9606 GN=RANBP2 PE=1 SV=2                                                       |      | -0,003953289 | 0,027937 |
| P23368 | NAD-dependent malic enzyme, mitochondrial OS=Homo sapiens OX=9606 GN=ME2 PE=1 SV=1                                              |      | -0,005042216 | 0,027228 |
| Q8WVVC | Dephospho-CoA kinase domain-containing protein OS=Homo sapiens OX=9606 GN=DCAKD PE=1 SV=1                                       |      | 0,012994146  | 0,027223 |
| Q96RF0 | Sorting nexin-18 OS=Homo sapiens OX=9606 GN=SNX18 PE=1 SV=2                                                                     |      | 0,007857544  | 0,026883 |
| Q92530 | Proteasome inhibitor PI31 subunit OS=Homo sapiens OX=9606 GN=PSMF1 PE=1 SV=2                                                    |      | 0,009400061  | 0,026789 |
| Q9Y6K9 | NF-kappa-B essential modulator OS=Homo sapiens OX=9606 GN=IKBKG PE=1 SV=2                                                       |      | 0,006839363  | 0,02669  |
| Q13683 | Integrin alpha-7 OS=Homo sapiens OX=9606 GN=ITGA7 PE=1 SV=3                                                                     |      | -0,005599721 | 0,026387 |
| P26373 | 60S ribosomal protein L13 OS=Homo sapiens OX=9606 GN=RPL13 PE=1 SV=4                                                            |      | 0,004604434  | 0,026291 |
| Q9UNNS | FAS-associated factor 1 OS=Homo sapiens OX=9606 GN=FAF1 PE=1 SV=2                                                               |      | 0,007604792  | 0,02601  |
| Q0VDG4 | Secernin-3 OS=Homo sapiens OX=9606 GN=SCRN3 PE=1 SV=1                                                                           |      | -0,012393896 | 0,025955 |
| O15347 | High mobility group protein B3 OS=Homo sapiens OX=9606 GN=HMGB3 PE=1 SV=4                                                       |      | -0,01347494  | 0,025709 |
| P61313 | 60S ribosomal protein L15 OS=Homo sapiens OX=9606 GN=RPL15 PE=1 SV=2                                                            |      | -0,00474422  | 0,025605 |
| Q9Y2R5 | 28S ribosomal protein S17, mitochondrial OS=Homo sapiens OX=9606 GN=MRPS17 PE=1 SV=1                                            |      | -0,01201906  | 0,025163 |
| Q4G0I3 | La-related protein 7 OS=Homo sapiens OX=9606 GN=LARP7 PE=1 SV=1                                                                 |      | 0,002112398  | 0,024998 |
| Q01629 | Interferon-induced transmembrane protein 2 OS=Homo sapiens OX=9606 GN=IFITM2 PE=1 SV=2                                          |      | 0,011765247  | 0,024628 |
| Q7L2H7 | Eukaryotic translation initiation factor 3 subunit M OS=Homo sapiens OX=9606 GN=EIF3M PE=1 SV=1                                 |      | 0,004271656  | 0,024375 |
| P05388 | 60S acidic ribosomal protein PO OS=Homo sapiens OX=9606 GN=RPLP0 PE=1 SV=1                                                      |      | -0,003540286 | 0,024105 |
| P50579 | Methionine aminopeptidase 2 OS=Homo sapiens OX=9606 GN=METAP2 PE=1 SV=1                                                         |      | 0,004760329  | 0,024103 |
| P49720 | Proteasome subunit beta type-3 OS=Homo sapiens OX=9606 GN=PSMB3 PE=1 SV=2                                                       |      | -0,00435043  | 0,023462 |
| P49902 | Cytosolic purine 5'-nucleotidase OS=Homo sapiens OX=9606 GN=NT5C2 PE=1 SV=1                                                     |      | 0,003860691  | 0,02316  |
| Q8TF05 | Serine/threonine-protein phosphatase 4 regulatory subunit 1 OS=Homo sapiens OX=9606 GN=PPP4R1 PE=1 SV=1                         |      | 0,003848299  | 0,023085 |
| O00159 | Unconventional myosin-Ic OS=Homo sapiens OX=9606 GN=MYO1C PE=1 SV=4                                                             |      | 0,001747777  | 0,022566 |
| Q15645 | Pachytene checkpoint protein 2 homolog OS=Homo sapiens OX=9606 GN=TRIP13 PE=1 SV=2                                              |      | -0,010435912 | 0,021825 |
| Q9UBQ7 | Glyoxylate reductase/hydroxypyruvate reductase OS=Homo sapiens OX=9606 GN=GRHPR PE=1 SV=1                                       |      | 0,003476782  | 0,021824 |
| Q8TBQ9 | Protein kish-A OS=Homo sapiens OX=9606 GN=TMEM167A PE=1 SV=1                                                                    |      | 0,010351394  | 0,021647 |
| Q9BVG4 | Protein PBDC1 OS=Homo sapiens OX=9606 GN=PBDC1 PE=1 SV=1                                                                        |      | -0,00387975  | 0,020906 |
| Q86W26 | NACHT, LRR and PYD domains-containing protein 10 OS=Homo sapiens OX=9606 GN=NLRP10 PE=1 SV=1                                    |      | 0,009682338  | 0,020238 |
| Q68E01 | Integrator complex subunit 3 OS=Homo sapiens OX=9606 GN=INTS3 PE=1 SV=1                                                         |      | 0,009591011  | 0,020046 |
| P36957 | Dihydropolyllysine-residue succinyltransferase component of 2-oxoglutarate dehydrogenase complex, mitochondrial OS=Homo sapiens |      | -0,003301633 | 0,019783 |
| Q8NFU7 | Methylcytosine dioxygenase TET1 OS=Homo sapiens OX=9606 GN=TET1 PE=1 SV=2                                                       |      | 0,016629944  | 0,019655 |
| Q5KXPO | MICOS complex subunit MIC13 OS=Homo sapiens OX=9606 GN=MICOS13 PE=1 SV=1                                                        |      | 0,009262519  | 0,019355 |
| P61019 | Ras-related protein Rab-2A OS=Homo sapiens OX=9606 GN=RAB2A PE=1 SV=1                                                           |      | 0,004411967  | 0,019043 |
| Q8VIL6 | Prolyl 3-hydroxylase 3 OS=Homo sapiens OX=9606 GN=P3H3 PE=1 SV=1                                                                |      | 0,002895375  | 0,018933 |
| Q5XP14 | E3 ubiquitin-protein ligase RNF123 OS=Homo sapiens OX=9606 GN=RNF123 PE=1 SV=1                                                  |      | 0,008948272  | 0,018694 |
| P62140 | Serine/threonine-protein phosphatase PP1-beta catalytic subunit OS=Homo sapiens OX=9606 GN=PPP1CB PE=1 SV=3                     |      | -0,004663907 | 0,018148 |
| Q8WU10 | Pyridine nucleotide-disulfide oxidoreductase domain-containing protein 1 OS=Homo sapiens OX=9606 GN=PYROXD1 PE=1 SV=1           |      | 0,008397011  | 0,017536 |
| P15151 | Poliiovirus receptor OS=Homo sapiens OX=9606 GN=PVR PE=1 SV=2                                                                   |      | -0,005072448 | 0,017298 |
| Q8TER5 | Rho guanine nucleotide exchange factor 40 OS=Homo sapiens OX=9606 GN=ARHGEF40 PE=1 SV=3                                         |      | -0,00439932  | 0,017112 |
| P35914 | Hydroxymethylglutaryl-CoA lyase, mitochondrial OS=Homo sapiens OX=9606 GN=HMGLCL PE=1 SV=2                                      |      | -0,004881569 | 0,016643 |
| Q14392 | Transforming growth factor beta activator LRRC32 OS=Homo sapiens OX=9606 GN=LRRC32 PE=1 SV=1                                    |      | -0,006638499 | 0,016313 |
| Q15208 | Serine/threonine-protein kinase 38 OS=Homo sapiens OX=9606 GN=STK38 PE=1 SV=1                                                   |      | -0,004718444 | 0,016084 |
| P46937 | Transcriptional coactivator YAP1 OS=Homo sapiens OX=9606 GN=YAP1 PE=1 SV=2                                                      |      | -0,002360777 | 0,01603  |
| Q5SW96 | Low density lipoprotein receptor adapter protein 1 OS=Homo sapiens OX=9606 GN=LDLRAP1 PE=1 SV=3                                 |      | -0,004500813 | 0,015338 |
| P22681 | E3 ubiquitin-protein ligase CBL OS=Homo sapiens OX=9606 GN=CBL PE=1 SV=2                                                        |      | 0,007319948  | 0,015275 |
| P46459 | Vesicle-fusing ATPase OS=Homo sapiens OX=9606 GN=NSF PE=1 SV=3                                                                  |      | -0,001527966 | 0,01454  |
| P61587 | Rho-related GTP-binding protein RhoE OS=Homo sapiens OX=9606 GN=RND3 PE=1 SV=1                                                  |      | 0,005108244  | 0,014498 |
| Q13190 | Syntaxin-5 OS=Homo sapiens OX=9606 GN=STX5 PE=1 SV=2                                                                            |      | 0,006719562  | 0,014016 |
| Q9H444 | Charged multivesicular body protein 4b OS=Homo sapiens OX=9606 GN=CHMP4B PE=1 SV=1                                              |      | -0,002736773 | 0,013809 |
| 060716 | Catenin delta-1 OS=Homo sapiens OX=9606 GN=CTNND1 PE=1 SV=1                                                                     |      | 0,001304998  | 0,013535 |
| O95777 | U6 snRNA-associated Sm-like protein LSM8 OS=Homo sapiens OX=9606 GN=LSM8 PE=1 SV=3                                              |      | -0,003952893 | 0,013463 |
| P04216 | Thy-1 membrane glycoprotein OS=Homo sapiens OX=9606 GN=THY1 PE=1 SV=2                                                           |      | 0,006414305  | 0,013377 |
| Q9P2J5 | Leucine-tRNA ligase, cytoplasmic OS=Homo sapiens OX=9606 GN=LARS PE=1 SV=2                                                      |      | 0,001247051  | 0,013338 |
| Q9H3U1 | Protein unc-45 homolog A OS=Homo sapiens OX=9606 GN=UNC45A PE=1 SV=1                                                            |      | 0,001890105  | 0,01329  |
| P53611 | Geranylgeranyl transferase type-2 subunit beta OS=Homo sapiens OX=9606 GN=RABGGTB PE=1 SV=2                                     |      | -0,006273429 | 0,013082 |
| P23470 | Receptor-type tyrosine-protein phosphatase gamma OS=Homo sapiens OX=9606 GN=PTPRG PE=1 SV=4                                     |      | 0,008514407  | 0,013018 |
| Q15814 | Tubulin-specific chaperone C OS=Homo sapiens OX=9606 GN=TBCC PE=1 SV=2                                                          |      | 0,00495457   | 0,012751 |
| Q99873 | Protein arginine N-methyltransferase 1 OS=Homo sapiens OX=9606 GN=PRMT1 PE=1 SV=3                                               |      | 0,001770383  | 0,012445 |
| Q9YSU8 | Mitochondrial pyruvate carrier 1 OS=Homo sapiens OX=9606 GN=MPC1 PE=1 SV=1                                                      |      | -0,005918363 | 0,012338 |
| Q8NFH3 | Nucleoporin Nup43 OS=Homo sapiens OX=9606 GN=NUP43 PE=1 SV=1                                                                    |      | 0,005845721  | 0,012186 |
| Q9UH8  | Fasciculation and elongation protein zeta-2 OS=Homo sapiens OX=9606 GN=FEZ2 PE=1 SV=2                                           |      | 0,005808775  | 0,012109 |
| Q15185 | Prostaglandin E synthase 3 OS=Homo sapiens OX=9606 GN=PTGES3 PE=1 SV=1                                                          |      | -0,002779267 | 0,011967 |
| Q16352 | Alpha-internexin OS=Homo sapiens OX=9606 GN=INA PE=1 SV=2                                                                       |      | -0,005671019 | 0,01182  |
| P61421 | V-type proton ATPase subunit d 1 OS=Homo sapiens OX=9606 GN=ATP6V0D1 PE=1 SV=1                                                  |      | 0,001839723  | 0,010991 |
| O00244 | Copper transport protein ATOX1 OS=Homo sapiens OX=9606 GN=ATOX1 PE=1 SV=1                                                       |      | 0,003851646  | 0,010918 |
| Q71D13 | Histone H3.2 OS=Homo sapiens OX=9606 GN=HIST2H3A PE=1 SV=3                                                                      |      | -0,005128138 | 0,010685 |
| Q99536 | Synaptic vesicle membrane protein VAT-1 homolog OS=Homo sapiens OX=9606 GN=VAT1 PE=1 SV=2                                       |      | 0,001421527  | 0,010655 |

|        |                                                                                                                   |              |          |
|--------|-------------------------------------------------------------------------------------------------------------------|--------------|----------|
| Q9BUQ8 | Probable ATP-dependent RNA helicase DDX23 OS=Homo sapiens OX=9606 GN=DDX23 PE=1 SV=3                              | -0,003675292 | 0,010416 |
| O43504 | Regulator complex protein LAMTOR5 OS=Homo sapiens OX=9606 GN=LAMTOR5 PE=1 SV=1                                    | 0,00267845   | 0,010395 |
| Q96EQ0 | Small glutamine-rich tetratricopeptide repeat-containing protein beta OS=Homo sapiens OX=9606 GN=SGTB PE=1 SV=1   | 0,002380789  | 0,010245 |
| O15212 | Prefoldin subunit 6 OS=Homo sapiens OX=9606 GN=PFDN6 PE=1 SV=1                                                    | -0,002897233 | 0,009855 |
| O43150 | Arf-GAP with SH3 domain, ANK repeat and PH domain-containing protein 2 OS=Homo sapiens OX=9606 GN=ASAP2 PE=1 SV=3 | -0,004712742 | 0,009816 |
| Q726E9 | E3 ubiquitin-protein ligase RBBP6 OS=Homo sapiens OX=9606 GN=RBBP6 PE=1 SV=1                                      | -0,004702986 | 0,009796 |
| O95297 | Myelin protein zero-like protein 1 OS=Homo sapiens OX=9606 GN=MPZL1 PE=1 SV=1                                     | 0,003292078  | 0,009327 |
| Q04656 | Copper-transporting ATPase 1 OS=Homo sapiens OX=9606 GN=ATP7A PE=1 SV=4                                           | 0,003825248  | 0,009157 |
| P29372 | DNA-3-methyladenine glycosylase OS=Homo sapiens OX=9606 GN=MPG PE=1 SV=3                                          | 0,004308981  | 0,008973 |
| Q9Y352 | Zinc finger protein 330 OS=Homo sapiens OX=9606 GN=ZNF330 PE=1 SV=1                                               | -0,004016768 | 0,008363 |
| Q9ULV4 | Coronin-1C OS=Homo sapiens OX=9606 GN=CORO1C PE=1 SV=1                                                            | 0,000948446  | 0,00811  |
| P15529 | Membrane cofactor protein OS=Homo sapiens OX=9606 GN=CD46 PE=1 SV=3                                               | 0,002793926  | 0,007912 |
| Q8N163 | Cell cycle and apoptosis regulator protein 2 OS=Homo sapiens OX=9606 GN=CCAR2 PE=1 SV=2                           | 0,001153917  | 0,007516 |
| Q9NP97 | Dynein light chain roadblock-type 1 OS=Homo sapiens OX=9606 GN=DYNLRB1 PE=1 SV=3                                  | 0,001538199  | 0,006611 |
| Q12982 | BCL2/adenovirus E1B 19 kDa protein-interacting protein 2 OS=Homo sapiens OX=9606 GN=BNIP2 PE=1 SV=1               | -0,003168199 | 0,006592 |
| Q8WWM7 | Ataxin-2-like protein OS=Homo sapiens OX=9606 GN=ATXN2L PE=1 SV=2                                                 | -0,000738718 | 0,006693 |
| Q13137 | Calcium-binding and coiled-coil domain-containing protein 2 OS=Homo sapiens OX=9606 GN=CALCOCO2 PE=1 SV=1         | 0,001607937  | 0,005559 |
| P14735 | Insulin-degrading enzyme OS=Homo sapiens OX=9606 GN=IDE PE=1 SV=4                                                 | 0,000963942  | 0,005465 |
| Q9UQ16 | Dynamin-3 OS=Homo sapiens OX=9606 GN=DNM3 PE=1 SV=4                                                               | 0,002424273  | 0,005041 |
| O95721 | Synaptosomal-associated protein 29 OS=Homo sapiens OX=9606 GN=SNAP29 PE=1 SV=1                                    | 0,001263405  | 0,004894 |
| O15118 | NPC intracellular cholesterol transporter 1 OS=Homo sapiens OX=9606 GN=NPC1 PE=1 SV=2                             | 0,001518402  | 0,004294 |
| P06748 | Nucleophosmin OS=Homo sapiens OX=9606 GN=NPM1 PE=1 SV=2                                                           | 0,000561381  | 0,003796 |
| Q96S97 | Myeloid-associated differentiation marker OS=Homo sapiens OX=9606 GN=MYADM PE=1 SV=2                              | -0,001089924 | 0,0037   |
| O14776 | Transcription elongation regulator 1 OS=Homo sapiens OX=9606 GN=TCERG1 PE=1 SV=2                                  | 0,001768201  | 0,003675 |
| P23919 | Thymidylate kinase OS=Homo sapiens OX=9606 GN=DTYMK PE=1 SV=4                                                     | -0,000932821 | 0,003166 |
| Q6F113 | Histone H2A type 2-A OS=Homo sapiens OX=9606 GN=HIST2H2AA3 PE=1 SV=3                                              | -0,001258233 | 0,002614 |
| P13073 | Cytochrome c oxidase subunit 4 isoform 1, mitochondrial OS=Homo sapiens OX=9606 GN=COX4I1 PE=1 SV=1               | 0,00050514   | 0,002168 |
| Q8IYS2 | Uncharacterized protein KIAA2013 OS=Homo sapiens OX=9606 GN=KIAA2013 PE=1 SV=1                                    | 0,001269259  | 0,001858 |
| Q8TED0 | U3 small nucleolar RNA-associated protein 15 homolog OS=Homo sapiens OX=9606 GN=UTP15 PE=1 SV=3                   | 0,000174614  | 0,001714 |
| Q9Y3A3 | MOB-like protein phocein OS=Homo sapiens OX=9606 GN=MOB4 PE=1 SV=1                                                | -0,000405425 | 0,001375 |
| Q8IUF8 | Ribosomal oxygenase 2 OS=Homo sapiens OX=9606 GN=RIOX2 PE=1 SV=1                                                  | -0,000546357 | 0,001135 |
| Q9UEW8 | STE20/SPS1-related proline-alanine-rich protein kinase OS=Homo sapiens OX=9606 GN=STK39 PE=1 SV=3                 | -0,000227589 | 0,000772 |
| P06865 | Beta-hexosaminidase subunit alpha OS=Homo sapiens OX=9606 GN=HEXA PE=1 SV=2                                       | 0,000162585  | 0,000629 |
| P35610 | Sterol O-acyltransferase 1 OS=Homo sapiens OX=9606 GN=SOAT1 PE=1 SV=3                                             | 0,000145795  | 0,000564 |
| P60033 | CD81 antigen OS=Homo sapiens OX=9606 GN=CD81 PE=1 SV=1                                                            | 0,00022074   | 0,000458 |
| Q9BWM7 | Sideroflexin-3 OS=Homo sapiens OX=9606 GN=SFN3 PE=1 SV=3                                                          | -5,60117E-05 | 0,000333 |
